# Supplementary material
Source: PubMed Central journal article supplement (PMC3494185)
Supplement: supp_M111.016592_mcp.M111.016592-1.pdf [file supp_M111.016592_mcp.M111.016592-1.pdf]

## Supplementary Figure S1

Fig. S1. The annotated spectra represented quantified proteins with single peptide identifications, including 136 proteins identified in whole proteome and 137 proteins identified in nuclear proteome.

# Whole proteome

| Protein No. | Leading protein name | Sequence                         | Mascot Score | Variable Modifications | SILAC State | Charge | m/z       |
|-------------|----------------------|----------------------------------|--------------|------------------------|-------------|--------|-----------|
| W-1         | splQ71DI3IH32_HUMAN  | FQSSAVMALQEASEAYLVGLFEDTNLCAIHAK | 135.45       | Unmodified             | Light       | 3      | 1171.9058 |

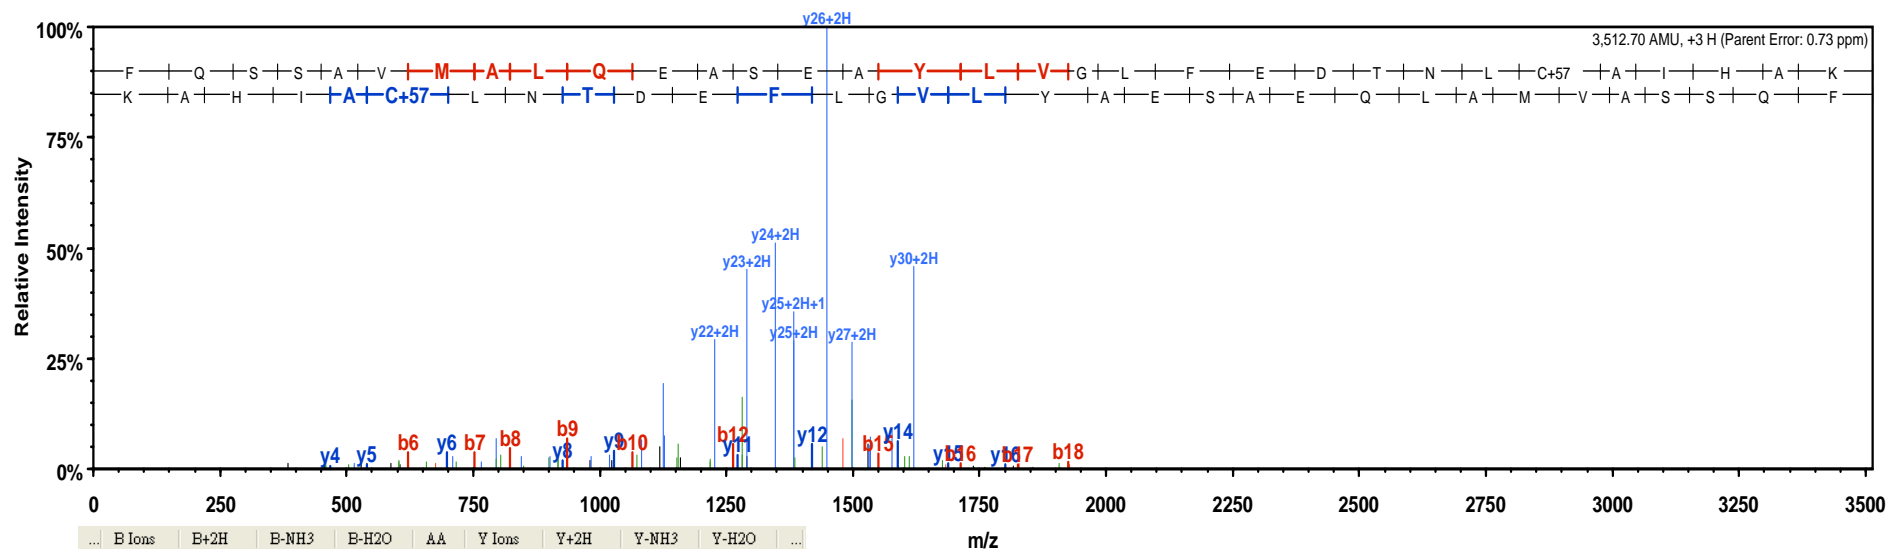

| ... | B Ions  | B+2H    | B-NH3   | B-H2O   | AA   | Y Ions  | Y+2H    | Y-NH3   | Y-H2O   | ... |
|-----|---------|---------|---------|---------|------|---------|---------|---------|---------|-----|
| 1   | 148.1   |         |         |         | F    | 3,513.7 | 1,757.4 | 3,496.7 | 3,495.7 | 32  |
| 2   | 276.1   |         | 259.1   |         | Q    | 3,366.6 | 1,683.8 | 3,349.6 | 3,348.6 | 31  |
| 3   | 363.2   |         | 346.1   | 345.2   | S    | 3,238.6 | 1,619.8 | 3,221.5 | 3,220.6 | 30  |
| 4   | 450.2   |         | 433.2   | 432.2   | S    | 3,151.5 | 1,576.3 | 3,134.5 | 3,133.5 | 29  |
| 5   | 521.2   |         | 504.2   | 503.2   | A    | 3,064.5 | 1,532.8 | 3,047.5 | 3,046.5 | 28  |
| 6   | 620.3   | 310.7   | 603.3   | 602.3   | V    | 2,993.5 | 1,497.2 | 2,976.4 | 2,975.5 | 27  |
| 7   | 751.3   | 376.2   | 734.3   | 733.3   | M    | 2,894.4 | 1,447.7 | 2,877.4 | 2,876.4 | 26  |
| 8   | 822.4   | 411.7   | 805.4   | 804.4   | A    | 2,763.4 | 1,382.2 | 2,746.3 | 2,745.4 | 25  |
| 9   | 935.5   | 468.2   | 918.4   | 917.5   | L    | 2,692.3 | 1,346.7 | 2,675.3 | 2,674.3 | 24  |
| 10  | 1,063.5 | 532.3   | 1,046.5 | 1,045.5 | Q    | 2,579.2 | 1,290.1 | 2,562.2 | 2,561.2 | 23  |
| 11  | 1,192.6 | 596.8   | 1,175.5 | 1,174.6 | E    | 2,451.2 | 1,226.1 | 2,434.2 | 2,433.2 | 22  |
| 12  | 1,263.6 | 632.3   | 1,246.6 | 1,245.6 | A    | 2,322.1 | 1,161.6 | 2,305.1 | 2,304.1 | 21  |
| 13  | 1,350.6 | 675.8   | 1,333.6 | 1,332.6 | S    | 2,251.1 | 1,126.1 | 2,234.1 | 2,233.1 | 20  |
| 14  | 1,479.7 | 740.3   | 1,462.7 | 1,461.7 | E    | 2,164.1 | 1,082.5 | 2,147.0 | 2,146.1 | 19  |
| 15  | 1,550.7 | 775.9   | 1,533.7 | 1,532.7 | A    | 2,035.0 | 1,018.0 | 2,018.0 | 2,017.0 | 18  |
| 16  | 1,713.8 | 857.4   | 1,696.8 | 1,695.8 | V    | 1,964.0 | 982.5   | 1,947.0 | 1,946.0 | 17  |
| 17  | 1,826.9 | 913.9   | 1,809.8 | 1,808.9 | L    | 1,800.9 | 901.0   | 1,783.9 | 1,782.9 | 16  |
| 18  | 1,925.9 | 963.5   | 1,908.9 | 1,907.9 | V    | 1,687.8 | 844.4   | 1,670.8 | 1,669.8 | 15  |
| 19  | 1,983.0 | 992.0   | 1,965.9 | 1,964.9 | G    | 1,588.8 | 794.9   | 1,571.8 | 1,570.8 | 14  |
| 20  | 2,096.0 | 1,048.5 | 2,079.0 | 2,078.0 | L    | 1,531.8 | 766.4   | 1,514.7 | 1,513.7 | 13  |
| 21  | 2,243.1 | 1,122.1 | 2,226.1 | 2,225.1 | F    | 1,418.7 | 709.8   | 1,401.6 | 1,400.7 | 12  |
| 22  | 2,372.1 | 1,186.6 | 2,355.1 | 2,354.1 | E    | 1,271.6 | 636.3   | 1,254.6 | 1,253.6 | 11  |
| 23  | 2,487.2 | 1,244.1 | 2,470.1 | 2,469.2 | D    | 1,142.6 | 571.8   | 1,125.5 | 1,124.6 | 10  |
| 24  | 2,588.2 | 1,294.6 | 2,571.2 | 2,570.2 | T    | 1,027.5 | 514.3   | 1,010.5 | 1,009.5 | 9   |
| 25  | 2,702.3 | 1,351.6 | 2,685.2 | 2,684.3 | N    | 926.5   | 463.7   | 909.5   |         | 8   |
| 26  | 2,815.3 | 1,408.2 | 2,798.3 | 2,797.3 | L    | 812.4   | 406.7   | 795.4   |         | 7   |
| 27  | 2,975.4 | 1,488.2 | 2,958.4 | 2,957.4 | C+57 | 699.4   | 350.2   | 682.3   |         | 6   |
| 28  | 3,046.4 | 1,523.7 | 3,029.4 | 3,028.4 | A    | 539.3   | 270.2   | 522.3   |         | 5   |
| 29  | 3,159.5 | 1,580.3 | 3,142.5 | 3,141.5 | I    | 468.3   | 234.7   | 451.3   |         | 4   |
| 30  | 3,296.6 | 1,648.8 | 3,279.5 | 3,278.5 | H    | 355.2   | 178.1   | 338.2   |         | 3   |
| 31  | 3,367.6 | 1,684.3 | 3,350.6 | 3,349.6 | A    | 218.1   |         | 201.1   |         | 2   |
| 32  | 3,513.7 | 1,757.4 | 3,496.7 | 3,495.7 | K    | 147.1   |         | 130.1   |         | 1   |

# Whole proteome

| Protein No. | Leading protein name  | Sequence                      | Mascot Score | Variable Modifications | SILAC State | Charge | m/z       |
|-------------|-----------------------|-------------------------------|--------------|------------------------|-------------|--------|-----------|
| W-2         | splQ6FI13IH2A2A_HUMAN | VGAGAPVYMAAVLEYLTAEILELAGNAAR | 127.84       | Unmodified             |             | 2      | 1467.2757 |

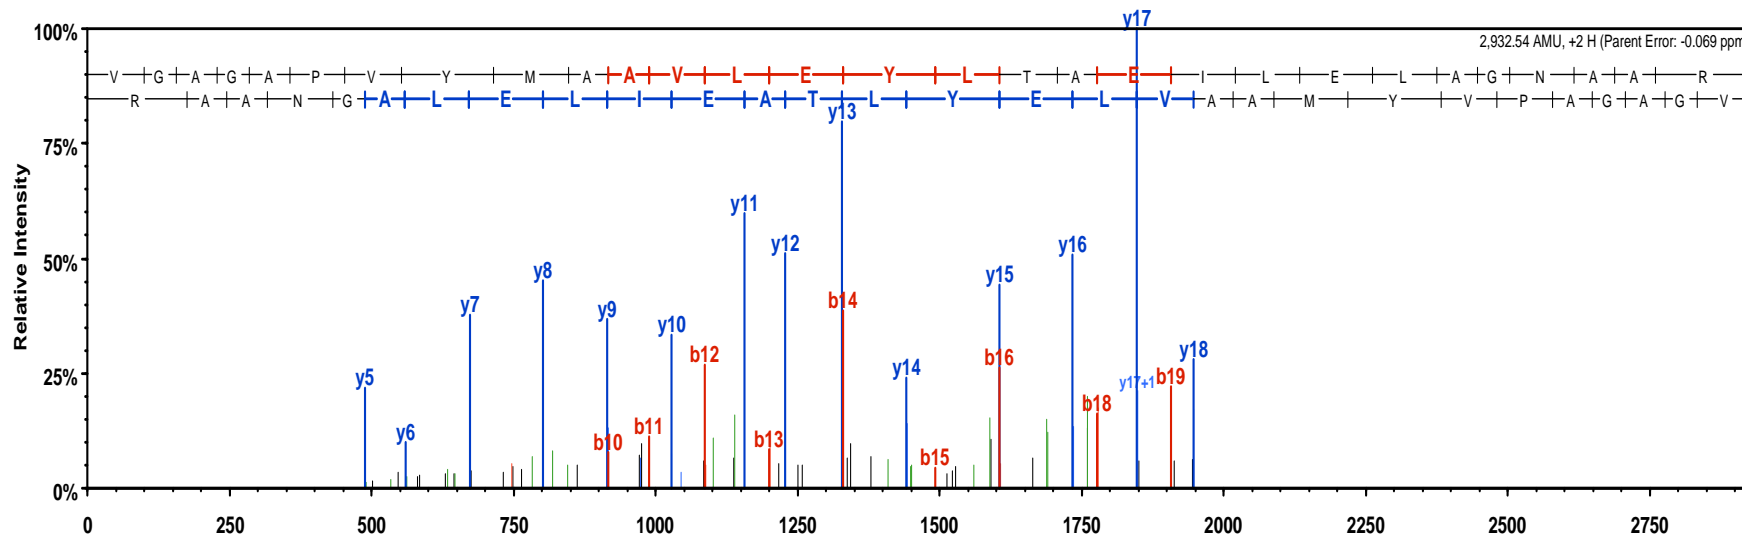

| ... | B Ions  | B+2H    | B-NH3   | E-H2O   | AA | Y Ions  | Y+2H    | Y-NH3   | Y-H2O   | ... |
|-----|---------|---------|---------|---------|----|---------|---------|---------|---------|-----|
| 1   | 100.1   |         |         |         | V  | 2,933.5 | 1,467.3 | 2,916.5 | 2,915.5 | 29  |
| 2   | 157.1   |         |         |         | G  | 2,834.5 | 1,417.7 | 2,817.4 | 2,816.5 | 28  |
| 3   | 228.1   |         |         |         | A  | 2,777.5 | 1,389.2 | 2,760.4 | 2,759.4 | 27  |
| 4   | 285.2   |         |         |         | G  | 2,706.4 | 1,353.7 | 2,689.4 | 2,688.4 | 26  |
| 5   | 356.2   |         |         |         | A  | 2,649.4 | 1,325.2 | 2,632.4 | 2,631.4 | 25  |
| 6   | 453.2   | 227.1   |         |         | P  | 2,578.4 | 1,289.7 | 2,561.3 | 2,560.3 | 24  |
| 7   | 552.3   | 276.7   |         |         | V  | 2,481.3 | 1,241.2 | 2,464.3 | 2,463.3 | 23  |
| 8   | 715.4   | 358.2   |         |         | V  | 2,382.2 | 1,191.6 | 2,365.2 | 2,364.2 | 22  |
| 9   | 846.4   | 423.7   |         |         | M  | 2,219.2 | 1,110.1 | 2,202.1 | 2,201.2 | 21  |
| 10  | 917.5   | 459.2   |         |         | A  | 2,088.1 | 1,044.6 | 2,071.1 | 2,070.1 | 20  |
| 11  | 988.5   | 494.7   |         |         | A  | 2,017.1 | 1,009.1 | 2,000.1 | 1,999.1 | 19  |
| 12  | 1,087.6 | 544.3   |         |         | V  | 1,946.1 | 973.5   | 1,929.0 | 1,928.0 | 18  |
| 13  | 1,200.6 | 600.8   |         |         | L  | 1,847.0 | 924.0   | 1,830.0 | 1,829.0 | 17  |
| 14  | 1,329.7 | 665.3   |         | 1,311.7 | E  | 1,733.9 | 867.5   | 1,716.9 | 1,715.9 | 16  |
| 15  | 1,492.8 | 746.9   |         | 1,474.7 | Y  | 1,604.9 | 802.9   | 1,587.8 | 1,586.9 | 15  |
| 16  | 1,605.8 | 803.4   |         | 1,587.8 | L  | 1,441.8 | 721.4   | 1,424.8 | 1,423.8 | 14  |
| 17  | 1,706.9 | 853.9   |         | 1,688.9 | T  | 1,328.7 | 664.9   | 1,311.7 | 1,310.7 | 13  |
| 18  | 1,777.9 | 889.5   |         | 1,759.9 | A  | 1,227.7 | 614.3   | 1,210.6 | 1,209.7 | 12  |
| 19  | 1,907.0 | 954.0   |         | 1,889.0 | E  | 1,156.6 | 578.8   | 1,139.6 | 1,138.6 | 11  |
| 20  | 2,020.0 | 1,010.5 |         | 2,002.0 | I  | 1,027.6 | 514.3   | 1,010.6 | 1,009.6 | 10  |
| 21  | 2,133.1 | 1,067.1 |         | 2,115.1 | L  | 914.5   | 457.8   | 897.5   | 896.5   | 9   |
| 22  | 2,262.2 | 1,131.6 |         | 2,244.2 | E  | 801.4   | 401.2   | 784.4   | 783.4   | 8   |
| 23  | 2,375.3 | 1,188.1 |         | 2,357.2 | L  | 672.4   | 336.7   | 655.4   |         | 7   |
| 24  | 2,446.3 | 1,223.7 |         | 2,428.3 | A  | 559.3   | 280.2   | 542.3   |         | 6   |
| 25  | 2,503.3 | 1,252.2 |         | 2,485.3 | G  | 488.3   |         | 471.2   |         | 5   |
| 26  | 2,617.4 | 1,309.2 | 2,600.3 | 2,599.3 | N  | 431.2   |         | 414.2   |         | 4   |
| 27  | 2,688.4 | 1,344.7 | 2,671.4 | 2,670.4 | A  | 317.2   |         | 300.2   |         | 3   |
| 28  | 2,759.4 | 1,380.2 | 2,742.4 | 2,741.4 | A  | 246.2   |         | 229.1   |         | 2   |
| 29  | 2,933.5 | 1,467.3 | 2,916.5 | 2,915.5 | R  | 175.1   |         | 158.1   |         | 1   |

# Whole proteome

| Protein No. | Leading protein name | Sequence                        | Mascot Score | Variable Modifications | SILAC State | Charge | m/z      |
|-------------|----------------------|---------------------------------|--------------|------------------------|-------------|--------|----------|
| W-2         | spIP84243IH33_HUMAN  | FQSAAGALQEASEAYLVGLFEDTNLCAIHAK | 114.78       | Unmodified             | Light       | 3      | 1146.573 |

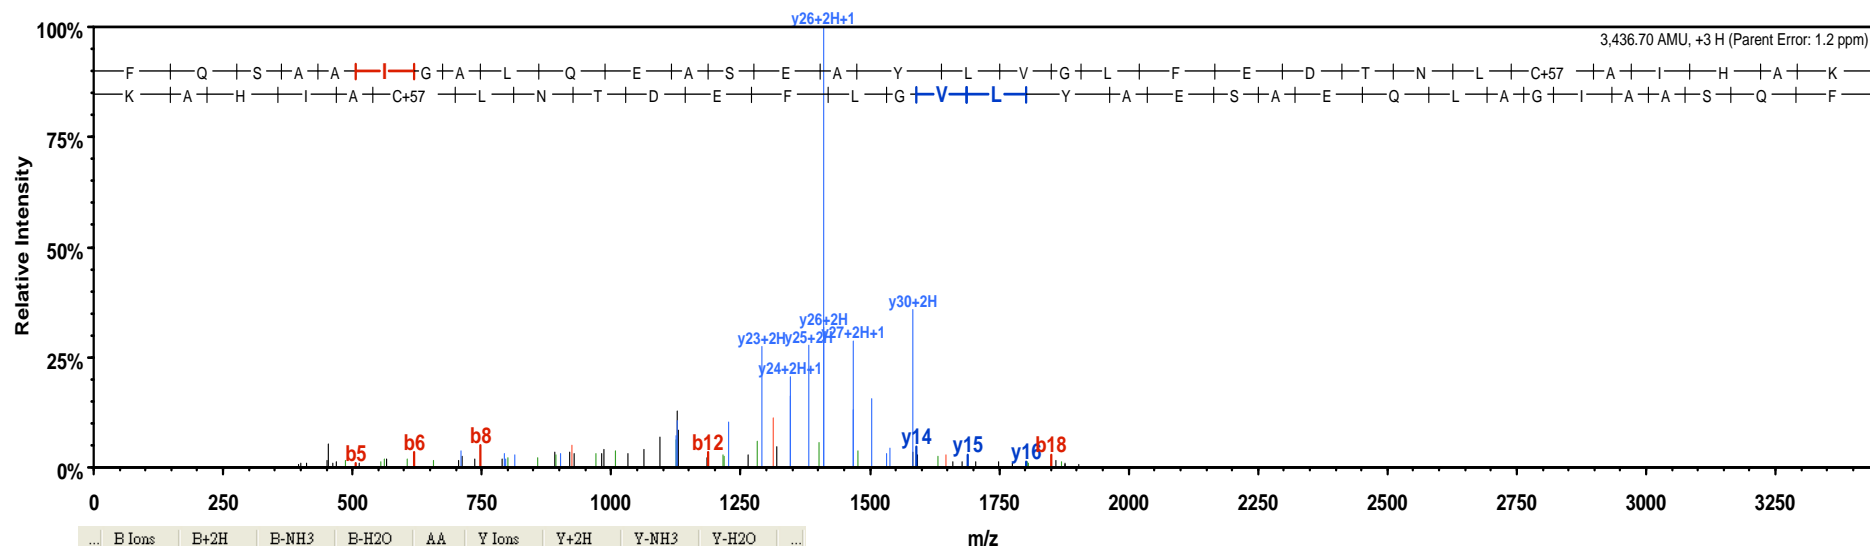

| ... | B Ions  | B+2H    | B-NH3   | B-H2O   | AA   | Y Ions  | Y+2H    | Y-NH3   | Y-H2O   | ... |
|-----|---------|---------|---------|---------|------|---------|---------|---------|---------|-----|
| 1   | 148.1   |         |         |         | F    | 3,437.7 | 1,719.4 | 3,420.7 | 3,419.7 | 32  |
| 2   | 276.1   |         | 259.1   |         | Q    | 3,290.6 | 1,645.8 | 3,273.6 | 3,272.6 | 31  |
| 3   | 363.2   |         | 346.1   | 345.2   | S    | 3,162.6 | 1,581.8 | 3,145.6 | 3,144.6 | 30  |
| 4   | 434.2   |         | 417.2   | 416.2   | A    | 3,075.5 | 1,538.3 | 3,058.5 | 3,057.5 | 29  |
| 5   | 505.2   |         | 488.2   | 487.2   | A    | 3,004.5 | 1,502.8 | 2,987.5 | 2,986.5 | 28  |
| 6   | 618.3   | 309.7   | 601.3   | 600.3   | I    | 2,933.5 | 1,467.2 | 2,916.4 | 2,915.5 | 27  |
| 7   | 675.3   | 338.2   | 658.3   | 657.3   | G    | 2,820.4 | 1,410.7 | 2,803.4 | 2,802.4 | 26  |
| 8   | 746.4   | 373.7   | 729.4   | 728.4   | A    | 2,763.4 | 1,382.2 | 2,746.3 | 2,745.4 | 25  |
| 9   | 859.5   | 430.2   | 842.4   | 841.5   | L    | 2,692.3 | 1,346.7 | 2,675.3 | 2,674.3 | 24  |
| 10  | 987.5   | 494.3   | 970.5   | 969.5   | Q    | 2,579.2 | 1,290.1 | 2,562.2 | 2,561.2 | 23  |
| 11  | 1,116.6 | 558.8   | 1,099.5 | 1,098.6 | E    | 2,451.2 | 1,226.1 | 2,434.2 | 2,433.2 | 22  |
| 12  | 1,187.6 | 594.3   | 1,170.6 | 1,169.6 | A    | 2,322.1 | 1,161.6 | 2,305.1 | 2,304.1 | 21  |
| 13  | 1,274.6 | 637.8   | 1,257.6 | 1,256.6 | S    | 2,251.1 | 1,126.1 | 2,234.1 | 2,233.1 | 20  |
| 14  | 1,403.7 | 702.3   | 1,386.7 | 1,385.7 | E    | 2,164.1 | 1,082.5 | 2,147.0 | 2,146.1 | 19  |
| 15  | 1,474.7 | 737.9   | 1,457.7 | 1,456.7 | A    | 2,035.0 | 1,018.0 | 2,018.0 | 2,017.0 | 18  |
| 16  | 1,637.8 | 819.4   | 1,620.8 | 1,619.8 | Y    | 1,964.0 | 982.5   | 1,947.0 | 1,946.0 | 17  |
| 17  | 1,750.9 | 875.9   | 1,733.8 | 1,732.9 | L    | 1,800.9 | 901.0   | 1,783.9 | 1,782.9 | 16  |
| 18  | 1,849.9 | 925.5   | 1,832.9 | 1,831.9 | V    | 1,687.8 | 844.4   | 1,670.8 | 1,669.8 | 15  |
| 19  | 1,907.0 | 954.0   | 1,889.9 | 1,888.9 | G    | 1,588.8 | 794.9   | 1,571.8 | 1,570.8 | 14  |
| 20  | 2,020.0 | 1,010.5 | 2,003.0 | 2,002.0 | L    | 1,531.8 | 766.4   | 1,514.7 | 1,513.7 | 13  |
| 21  | 2,167.1 | 1,084.1 | 2,150.1 | 2,149.1 | F    | 1,418.7 | 709.8   | 1,401.6 | 1,400.7 | 12  |
| 22  | 2,296.1 | 1,148.6 | 2,279.1 | 2,278.1 | E    | 1,271.6 | 636.3   | 1,254.6 | 1,253.6 | 11  |
| 23  | 2,411.2 | 1,206.1 | 2,394.1 | 2,393.2 | D    | 1,142.6 | 571.8   | 1,125.5 | 1,124.6 | 10  |
| 24  | 2,512.2 | 1,256.6 | 2,495.2 | 2,494.2 | T    | 1,027.5 | 514.3   | 1,010.5 | 1,009.5 | 9   |
| 25  | 2,626.3 | 1,313.6 | 2,609.2 | 2,608.3 | N    | 926.5   | 463.7   | 909.5   |         | 8   |
| 26  | 2,739.4 | 1,370.2 | 2,722.3 | 2,721.3 | L    | 812.4   | 406.7   | 795.4   |         | 7   |
| 27  | 2,899.4 | 1,450.2 | 2,882.4 | 2,881.4 | C+57 | 699.4   | 350.2   | 682.3   |         | 6   |
| 28  | 2,970.4 | 1,485.7 | 2,953.4 | 2,952.4 | A    | 539.3   | 270.2   | 522.3   |         | 5   |
| 29  | 3,083.5 | 1,542.3 | 3,066.5 | 3,065.5 | I    | 468.3   | 234.7   | 451.3   |         | 4   |
| 30  | 3,220.6 | 1,610.8 | 3,203.5 | 3,202.6 | H    | 355.2   | 178.1   | 338.2   |         | 3   |
| 31  | 3,291.6 | 1,646.3 | 3,274.6 | 3,273.6 | A    | 218.1   |         | 201.1   |         | 2   |
| 32  | 3,437.7 | 1,719.4 | 3,420.7 | 3,419.7 | K    | 147.1   |         | 130.1   |         | 1   |

# Whole proteome

| Protein No. | Leading protein name | Sequence             | Mascot Score | Variable Modifications | SILAC State | Charge | m/z       |
|-------------|----------------------|----------------------|--------------|------------------------|-------------|--------|-----------|
| W-3         | spIP08397IHEM3_HUMAN | GPQLAAQNGLISLANLLLSK | 111.92       | Unmodified             | Heavy       | 2      | 1011.0913 |

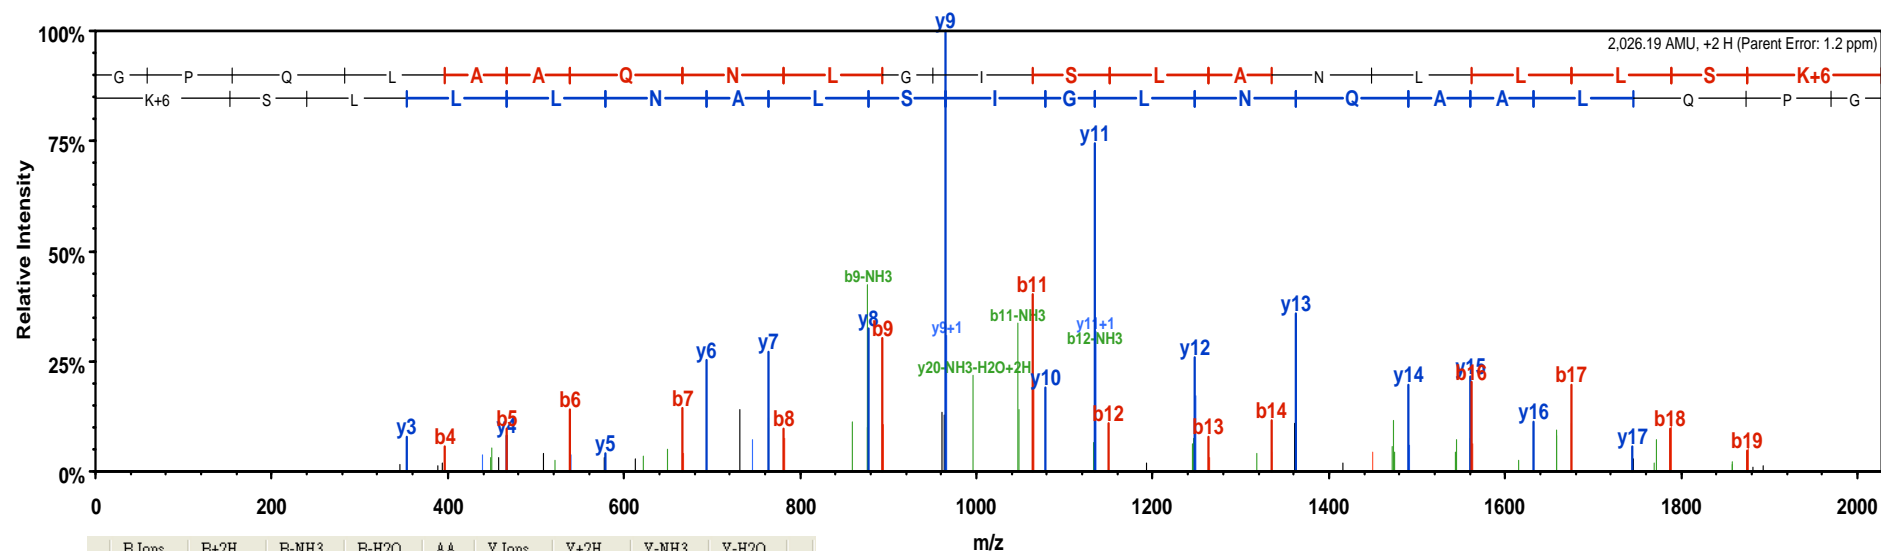

| ... | B Ions  | B+2H    | B-NH3   | B-H2O   | AA  | Y Ions  | Y+2H    | Y-NH3   | Y-H2O   | ... |
|-----|---------|---------|---------|---------|-----|---------|---------|---------|---------|-----|
| 1   | 58.0    |         |         |         | G   | 2,027.2 | 1,014.1 | 2,010.2 | 2,009.2 | 20  |
| 2   | 155.1   |         |         |         | P   | 1,970.2 | 985.6   | 1,953.1 | 1,952.2 | 19  |
| 3   | 283.1   |         | 266.1   |         | Q   | 1,873.1 | 937.1   | 1,856.1 | 1,855.1 | 18  |
| 4   | 396.2   |         | 379.2   |         | L   | 1,745.1 | 873.0   | 1,728.0 | 1,727.1 | 17  |
| 5   | 467.3   |         | 450.2   |         | A   | 1,632.0 | 816.5   | 1,615.0 | 1,614.0 | 16  |
| 6   | 538.3   | 269.7   | 521.3   |         | A   | 1,560.9 | 781.0   | 1,543.9 | 1,542.9 | 15  |
| 7   | 666.4   | 333.7   | 649.3   |         | Q   | 1,489.9 | 745.5   | 1,472.9 | 1,471.9 | 14  |
| 8   | 780.4   | 390.7   | 763.4   |         | N   | 1,361.8 | 681.4   | 1,344.8 | 1,343.8 | 13  |
| 9   | 893.5   | 447.2   | 876.5   |         | L   | 1,247.8 | 624.4   | 1,230.8 | 1,229.8 | 12  |
| 10  | 950.5   | 475.8   | 933.5   |         | G   | 1,134.7 | 567.9   | 1,117.7 | 1,116.7 | 11  |
| 11  | 1,063.6 | 532.3   | 1,046.6 |         | I   | 1,077.7 | 539.4   | 1,060.7 | 1,059.7 | 10  |
| 12  | 1,150.6 | 575.8   | 1,133.6 | 1,132.6 | S   | 964.6   | 482.8   | 947.6   | 946.6   | 9   |
| 13  | 1,263.7 | 632.4   | 1,246.7 | 1,245.7 | L   | 877.6   | 439.3   | 860.6   | 859.6   | 8   |
| 14  | 1,334.7 | 667.9   | 1,317.7 | 1,316.7 | A   | 764.5   | 382.8   | 747.5   | 746.5   | 7   |
| 15  | 1,448.8 | 724.9   | 1,431.8 | 1,430.8 | N   | 693.5   | 347.2   | 676.4   | 675.4   | 6   |
| 16  | 1,561.9 | 781.4   | 1,544.8 | 1,543.9 | L   | 579.4   |         | 562.4   | 561.4   | 5   |
| 17  | 1,675.0 | 838.0   | 1,657.9 | 1,656.9 | L   | 466.3   |         | 449.3   | 448.3   | 4   |
| 18  | 1,788.0 | 894.5   | 1,771.0 | 1,770.0 | L   | 353.2   |         | 336.2   | 335.2   | 3   |
| 19  | 1,875.1 | 938.0   | 1,858.0 | 1,857.1 | S   | 240.2   |         | 223.1   | 222.2   | 2   |
| 20  | 2,027.2 | 1,014.1 | 2,010.2 | 2,009.2 | K+6 | 153.1   |         | 136.1   |         | 1   |

# Whole proteome

| Protein No. | Leading protein name  | Sequence         | Mascot Score | Variable Modifications | SILAC State | Charge | m/z       |
|-------------|-----------------------|------------------|--------------|------------------------|-------------|--------|-----------|
| W-5         | splQ15836IVAMP3_HUMAN | LQQTQNQVDEVVDIMR | 111.61       | Unmodified             |             | 2      | 958.48074 |

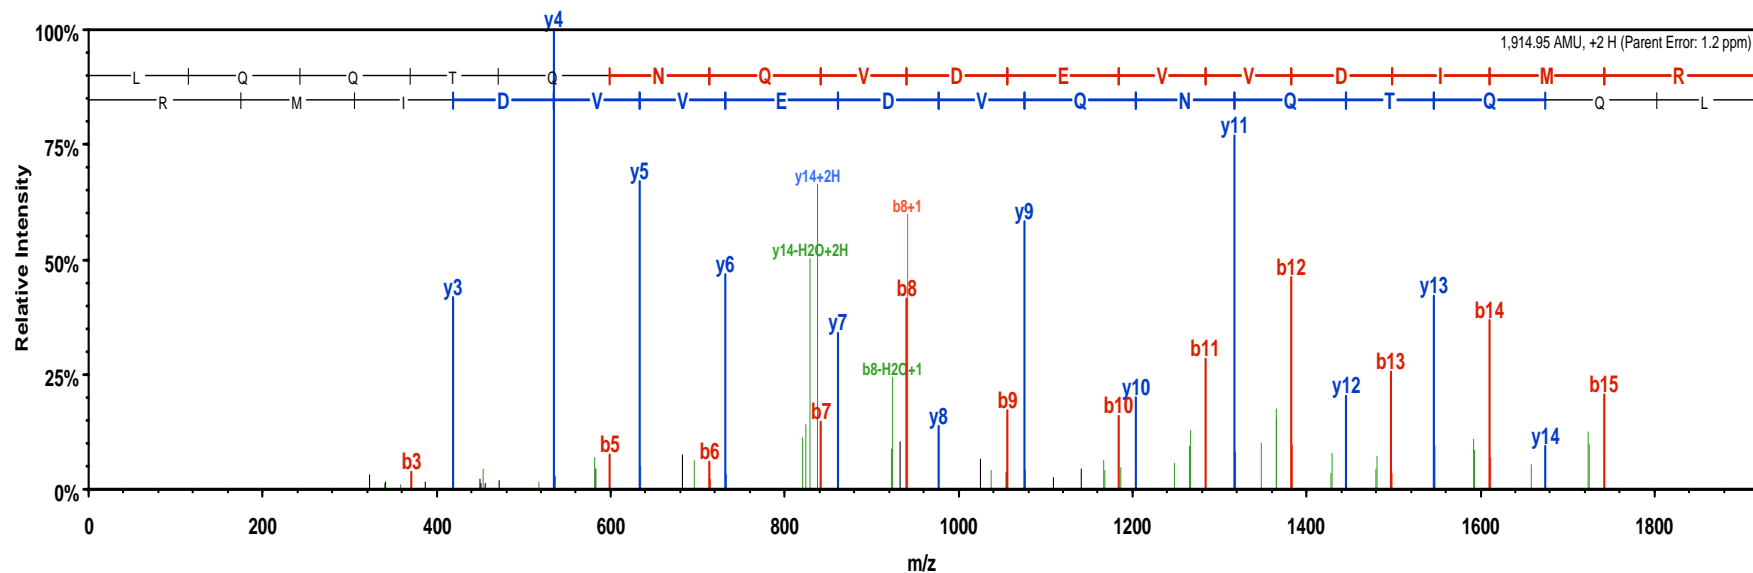

| ... | B Ions  | B+2H  | B-NH3   | E-H2O   | AA | Y Ions  | Y+2H  | Y-NH3   | Y-H2O   | ... |
|-----|---------|-------|---------|---------|----|---------|-------|---------|---------|-----|
| 1   | 114.1   |       |         |         | L  | 1,916.0 | 958.5 | 1,898.9 | 1,897.9 | 16  |
| 2   | 242.1   |       | 225.1   |         | Q  | 1,802.9 | 901.9 | 1,785.8 | 1,784.9 | 15  |
| 3   | 370.2   |       | 353.2   |         | Q  | 1,674.8 | 837.9 | 1,657.8 | 1,656.8 | 14  |
| 4   | 471.3   |       | 454.2   | 453.2   | T  | 1,546.8 | 773.9 | 1,529.7 | 1,528.7 | 13  |
| 5   | 599.3   |       | 582.3   | 581.3   | Q  | 1,445.7 | 723.4 | 1,428.7 | 1,427.7 | 12  |
| 6   | 713.4   | 357.2 | 696.3   | 695.3   | N  | 1,317.6 | 659.3 | 1,300.6 | 1,299.6 | 11  |
| 7   | 841.4   | 421.2 | 824.4   | 823.4   | Q  | 1,203.6 | 602.3 | 1,186.6 | 1,185.6 | 10  |
| 8   | 940.5   | 470.7 | 923.5   | 922.5   | V  | 1,075.5 | 538.3 | 1,058.5 | 1,057.5 | 9   |
| 9   | 1,055.5 | 528.3 | 1,038.5 | 1,037.5 | D  | 976.5   | 488.7 | 959.5   | 958.5   | 8   |
| 10  | 1,184.6 | 592.8 | 1,167.5 | 1,166.5 | E  | 861.5   | 431.2 | 844.4   | 843.4   | 7   |
| 11  | 1,283.6 | 642.3 | 1,266.6 | 1,265.6 | V  | 732.4   | 366.7 | 715.4   | 714.4   | 6   |
| 12  | 1,382.7 | 691.8 | 1,365.7 | 1,364.7 | V  | 633.3   |       | 616.3   | 615.3   | 5   |
| 13  | 1,497.7 | 749.4 | 1,480.7 | 1,479.7 | D  | 534.3   |       | 517.2   | 516.3   | 4   |
| 14  | 1,610.8 | 805.9 | 1,593.8 | 1,592.8 | I  | 419.2   |       | 402.2   |         | 3   |
| 15  | 1,741.8 | 871.4 | 1,724.8 | 1,723.8 | M  | 306.2   |       | 289.1   |         | 2   |
| 16  | 1,916.0 | 958.5 | 1,898.9 | 1,897.9 | R  | 175.1   |       | 158.1   |         | 1   |

# Whole proteome

| Protein No. | Leading protein name | Sequence                        | Mascot Score | Variable Modifications | SILAC State | Charge | m/z       |
|-------------|----------------------|---------------------------------|--------------|------------------------|-------------|--------|-----------|
| W-4         | sp Q13901 C1D_HUMAN  | AGEEINEDYPVEIHEYLAFENSIGAVDEMLK | 109.12       | Unmodified             | Light       | 3      | 1204.5627 |

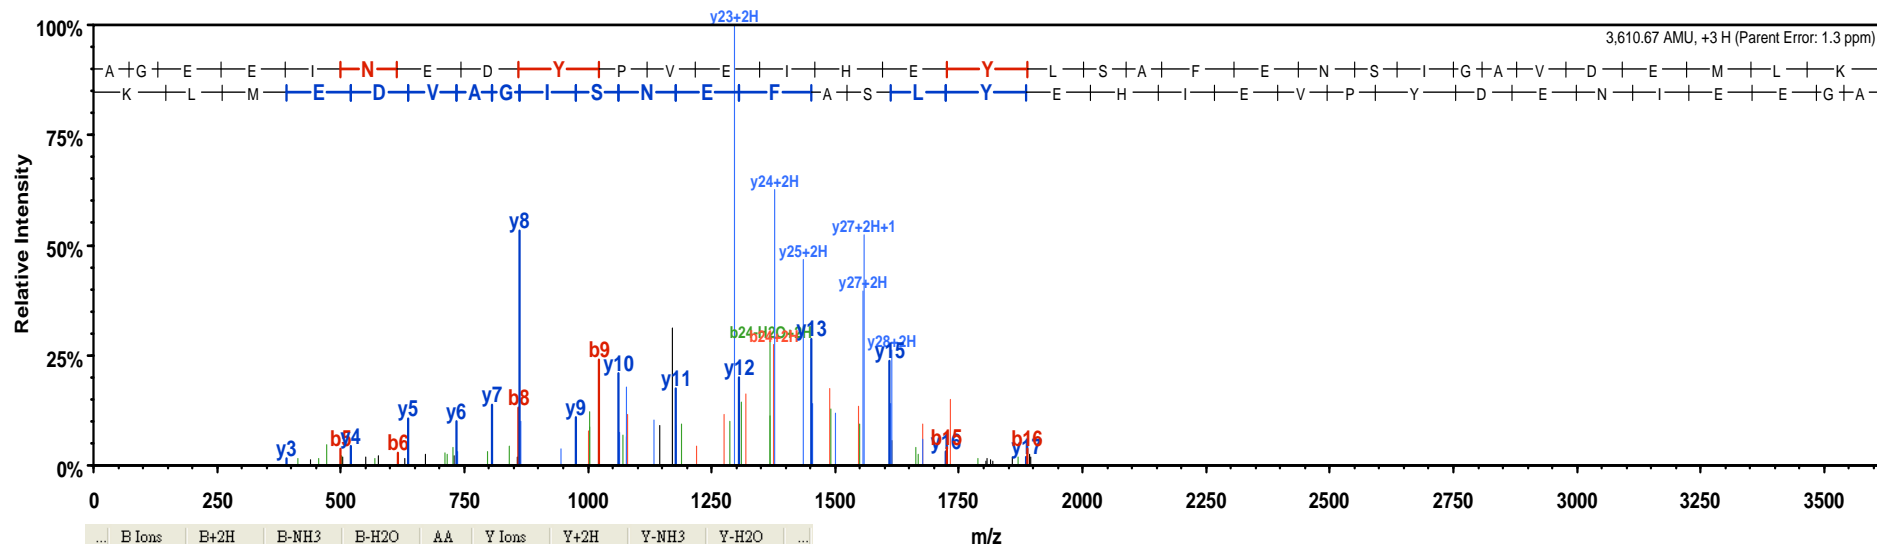

| ... | B Ions  | B+2H    | B-NH3   | B-H2O   | AA | Y Ions  | Y+2H    | Y-NH3   | Y-H2O   | ... |
|-----|---------|---------|---------|---------|----|---------|---------|---------|---------|-----|
| 1   | 72.0    |         |         |         | A  | 3,611.7 | 1,806.3 | 3,594.6 | 3,593.7 | 32  |
| 2   | 129.1   |         |         |         | G  | 3,540.6 | 1,770.8 | 3,523.6 | 3,522.6 | 31  |
| 3   | 258.1   |         |         | 240.1   | E  | 3,483.6 | 1,742.3 | 3,466.6 | 3,465.6 | 30  |
| 4   | 387.2   |         |         | 369.1   | E  | 3,354.6 | 1,677.8 | 3,337.5 | 3,336.6 | 29  |
| 5   | 500.2   |         |         | 482.2   | I  | 3,225.5 | 1,613.3 | 3,208.5 | 3,207.5 | 28  |
| 6   | 614.3   | 307.6   | 597.3   | 596.3   | N  | 3,112.4 | 1,556.7 | 3,095.4 | 3,094.4 | 27  |
| 7   | 743.3   | 372.2   | 726.3   | 725.3   | E  | 2,998.4 | 1,499.7 | 2,981.4 | 2,980.4 | 26  |
| 8   | 858.3   | 429.7   | 841.3   | 840.3   | D  | 2,869.4 | 1,435.2 | 2,852.3 | 2,851.3 | 25  |
| 9   | 1,021.4 | 511.2   | 1,004.4 | 1,003.4 | Y  | 2,754.3 | 1,377.7 | 2,737.3 | 2,736.3 | 24  |
| 10  | 1,118.5 | 559.7   | 1,101.4 | 1,100.5 | P  | 2,591.3 | 1,296.1 | 2,574.2 | 2,573.3 | 23  |
| 11  | 1,217.5 | 609.3   | 1,200.5 | 1,199.5 | V  | 2,494.2 | 1,247.6 | 2,477.2 | 2,476.2 | 22  |
| 12  | 1,346.6 | 673.8   | 1,329.5 | 1,328.6 | E  | 2,395.1 | 1,198.1 | 2,378.1 | 2,377.1 | 21  |
| 13  | 1,459.7 | 730.3   | 1,442.6 | 1,441.6 | I  | 2,266.1 | 1,133.6 | 2,249.1 | 2,248.1 | 20  |
| 14  | 1,596.7 | 798.9   | 1,579.7 | 1,578.7 | H  | 2,153.0 | 1,077.0 | 2,136.0 | 2,135.0 | 19  |
| 15  | 1,725.8 | 863.4   | 1,708.7 | 1,707.7 | E  | 2,016.0 | 1,008.5 | 1,998.9 | 1,998.0 | 18  |
| 16  | 1,888.8 | 944.9   | 1,871.8 | 1,870.8 | Y  | 1,886.9 | 944.0   | 1,869.9 | 1,868.9 | 17  |
| 17  | 2,001.9 | 1,001.5 | 1,984.9 | 1,983.9 | L  | 1,723.9 | 862.4   | 1,706.8 | 1,705.8 | 16  |
| 18  | 2,088.9 | 1,045.0 | 2,071.9 | 2,070.9 | S  | 1,610.8 | 805.9   | 1,593.7 | 1,592.8 | 15  |
| 19  | 2,160.0 | 1,080.5 | 2,143.0 | 2,142.0 | A  | 1,523.7 | 762.4   | 1,506.7 | 1,505.7 | 14  |
| 20  | 2,307.0 | 1,154.0 | 2,290.0 | 2,289.0 | F  | 1,452.7 | 726.9   | 1,435.7 | 1,434.7 | 13  |
| 21  | 2,436.1 | 1,218.5 | 2,419.1 | 2,418.1 | E  | 1,305.6 | 653.3   | 1,288.6 | 1,287.6 | 12  |
| 22  | 2,550.1 | 1,275.6 | 2,533.1 | 2,532.1 | N  | 1,176.6 | 588.8   | 1,159.6 | 1,158.6 | 11  |
| 23  | 2,637.2 | 1,319.1 | 2,620.1 | 2,619.2 | S  | 1,062.6 | 531.8   | 1,045.5 | 1,044.5 | 10  |
| 24  | 2,750.2 | 1,375.6 | 2,733.2 | 2,732.2 | I  | 975.5   | 488.3   | 958.5   | 957.5   | 9   |
| 25  | 2,807.3 | 1,404.1 | 2,790.2 | 2,789.3 | G  | 862.4   | 431.7   | 845.4   | 844.4   | 8   |
| 26  | 2,878.3 | 1,439.7 | 2,861.3 | 2,860.3 | A  | 805.4   | 403.2   | 788.4   | 787.4   | 7   |
| 27  | 2,977.4 | 1,489.2 | 2,960.3 | 2,959.4 | V  | 734.4   | 367.7   | 717.3   | 716.4   | 6   |
| 28  | 3,092.4 | 1,546.7 | 3,075.4 | 3,074.4 | D  | 635.3   |         | 618.3   | 617.3   | 5   |
| 29  | 3,221.4 | 1,611.2 | 3,204.4 | 3,203.4 | E  | 520.3   |         | 503.3   | 502.3   | 4   |
| 30  | 3,352.5 | 1,676.7 | 3,335.5 | 3,334.5 | M  | 391.2   |         | 374.2   |         | 3   |
| 31  | 3,465.6 | 1,733.3 | 3,448.5 | 3,447.6 | L  | 260.2   |         | 243.2   |         | 2   |
| 32  | 3,611.7 | 1,806.3 | 3,594.6 | 3,593.7 | K  | 147.1   |         | 130.1   |         | 1   |

# Whole proteome

| Protein No. | Leading protein name | Sequence               | Mascot Score | Variable Modifications | SILAC State | Charge | m/z       |
|-------------|----------------------|------------------------|--------------|------------------------|-------------|--------|-----------|
| W-7         | splP63167IDYL1_HUMAN | NADMSEEMQQDSVECATQALEK | 108.94       | Unmodified             | Heavy       | 2      | 1257.5251 |

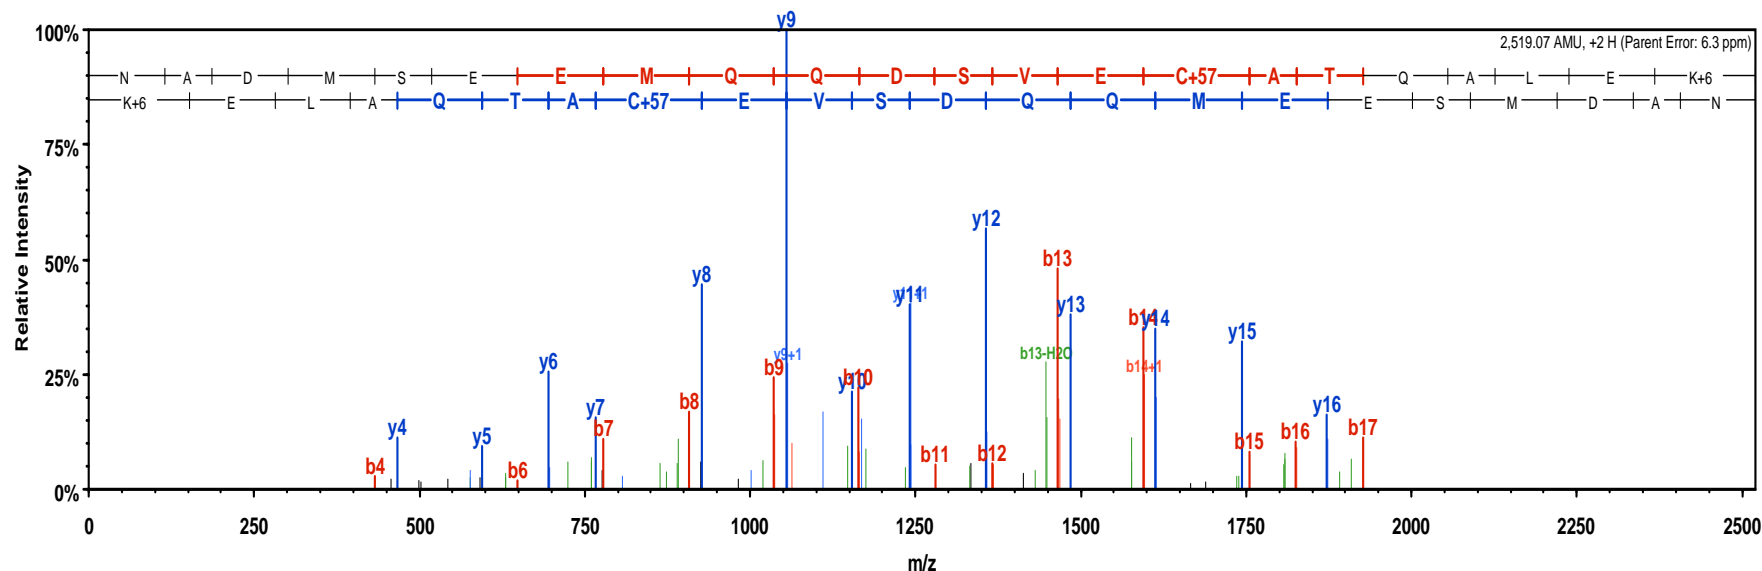

| ... | B Ions  | B+2H    | B-NH3   | B-H2O   | AA   | Y Ions  | Y+2H    | Y-NH3   | Y-H2O   | ... |
|-----|---------|---------|---------|---------|------|---------|---------|---------|---------|-----|
| 1   | 115.1   |         | 98.0    |         | N    | 2,520.1 | 1,260.5 | 2,503.0 | 2,502.1 | 22  |
| 2   | 186.1   |         | 169.1   |         | A    | 2,406.0 | 1,203.5 | 2,389.0 | 2,388.0 | 21  |
| 3   | 301.1   |         | 284.1   | 283.1   | D    | 2,335.0 | 1,168.0 | 2,318.0 | 2,317.0 | 20  |
| 4   | 432.2   |         | 415.1   | 414.1   | M    | 2,220.0 | 1,110.5 | 2,202.9 | 2,201.9 | 19  |
| 5   | 519.2   |         | 502.2   | 501.2   | S    | 2,088.9 | 1,045.0 | 2,071.9 | 2,070.9 | 18  |
| 6   | 648.2   | 324.6   | 631.2   | 630.2   | E    | 2,001.9 | 1,001.4 | 1,984.9 | 1,983.9 | 17  |
| 7   | 777.3   | 389.1   | 760.2   | 759.3   | E    | 1,872.8 | 936.9   | 1,855.8 | 1,854.8 | 16  |
| 8   | 908.3   | 454.7   | 891.3   | 890.3   | M    | 1,743.8 | 872.4   | 1,726.8 | 1,725.8 | 15  |
| 9   | 1,036.4 | 518.7   | 1,019.3 | 1,018.4 | Q    | 1,612.8 | 806.9   | 1,595.7 | 1,594.7 | 14  |
| 10  | 1,164.4 | 582.7   | 1,147.4 | 1,146.4 | Q    | 1,484.7 | 742.9   | 1,467.7 | 1,466.7 | 13  |
| 11  | 1,279.5 | 640.2   | 1,262.4 | 1,261.4 | D    | 1,356.6 | 678.8   | 1,339.6 | 1,338.6 | 12  |
| 12  | 1,366.5 | 683.7   | 1,349.5 | 1,348.5 | S    | 1,241.6 | 621.3   | 1,224.6 | 1,223.6 | 11  |
| 13  | 1,465.6 | 733.3   | 1,448.5 | 1,447.5 | V    | 1,154.6 | 577.8   | 1,137.6 | 1,136.6 | 10  |
| 14  | 1,594.6 | 797.8   | 1,577.6 | 1,576.6 | E    | 1,055.5 | 528.3   | 1,038.5 | 1,037.5 | 9   |
| 15  | 1,754.6 | 877.8   | 1,737.6 | 1,736.6 | C+57 | 926.5   | 463.7   | 909.4   | 908.5   | 8   |
| 16  | 1,825.7 | 913.3   | 1,808.6 | 1,807.7 | A    | 766.4   | 383.7   | 749.4   | 748.4   | 7   |
| 17  | 1,926.7 | 963.9   | 1,909.7 | 1,908.7 | T    | 695.4   | 348.2   | 678.4   | 677.4   | 6   |
| 18  | 2,054.8 | 1,027.9 | 2,037.7 | 2,036.8 | Q    | 594.4   |         | 577.3   | 576.3   | 5   |
| 19  | 2,125.8 | 1,063.4 | 2,108.8 | 2,107.8 | A    | 466.3   |         | 449.3   | 448.3   | 4   |
| 20  | 2,238.9 | 1,120.0 | 2,221.9 | 2,220.9 | L    | 395.3   |         | 378.2   | 377.2   | 3   |
| 21  | 2,367.9 | 1,184.5 | 2,350.9 | 2,349.9 | E    | 282.2   |         | 265.1   | 264.2   | 2   |
| 22  | 2,520.1 | 1,260.5 | 2,503.0 | 2,502.1 | K+6  | 153.1   |         | 136.1   |         | 1   |



# Whole proteome

| Protein No. | Leading protein name   | Sequence         | Mascot Score | Variable Modifications | SILAC State | Charge | m/z       |
|-------------|------------------------|------------------|--------------|------------------------|-------------|--------|-----------|
| W-5         | sp Q9NUIY8 TBC23_HUMAN | EVILTQESDSKEEVIK | 107.85       | Unmodified             | Light       | 2      | 923.98585 |

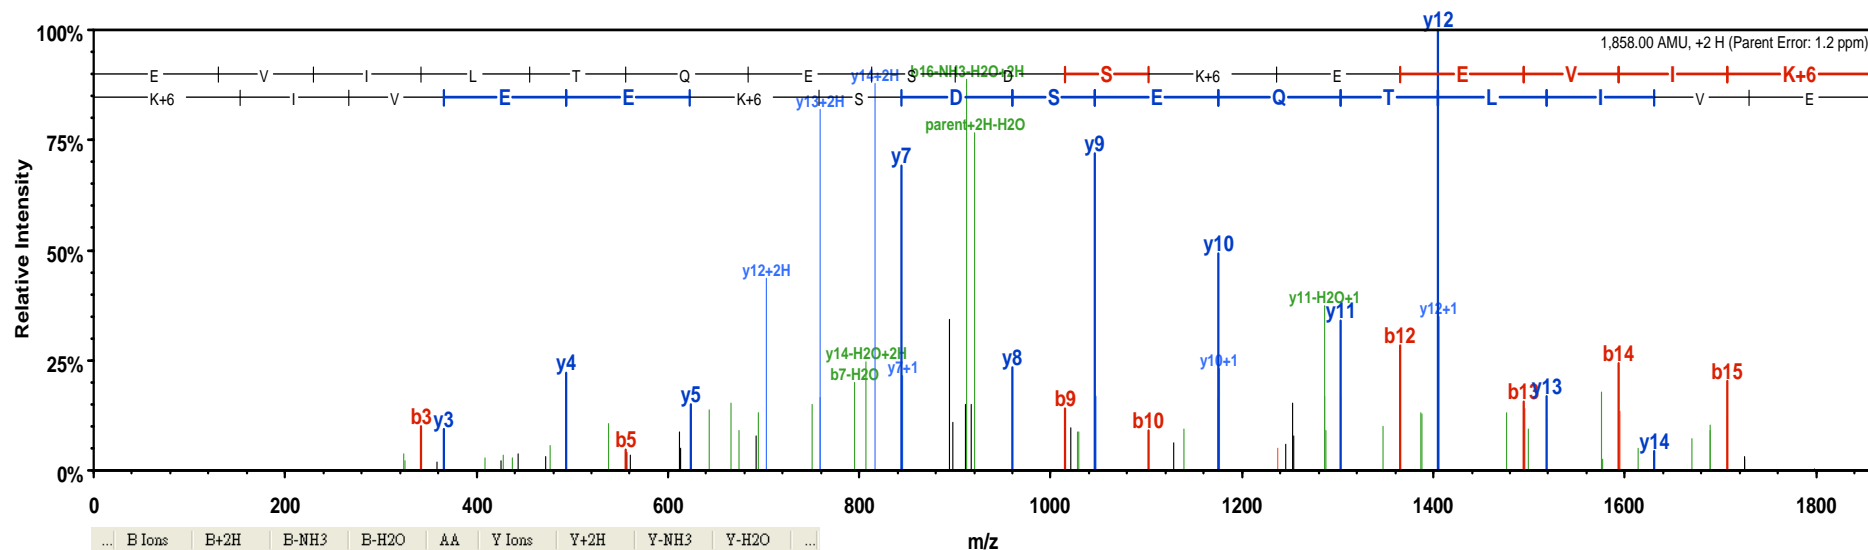

| ... | B Ions  | B+2H  | B-NH3   | B-H2O   | AA | Y Ions  | Y+2H  | Y-NH3   | Y-H2O   | ... |
|-----|---------|-------|---------|---------|----|---------|-------|---------|---------|-----|
| 1   | 130.0   |       |         | 112.0   | E  | 1,847.0 | 924.0 | 1,829.9 | 1,829.0 | 16  |
| 2   | 229.1   |       |         | 211.1   | V  | 1,717.9 | 859.5 | 1,700.9 | 1,699.9 | 15  |
| 3   | 342.2   |       |         | 324.2   | I  | 1,618.9 | 809.9 | 1,601.8 | 1,600.8 | 14  |
| 4   | 455.3   |       |         | 437.3   | L  | 1,505.8 | 753.4 | 1,488.7 | 1,487.8 | 13  |
| 5   | 556.3   |       |         | 538.3   | T  | 1,392.7 | 696.8 | 1,375.7 | 1,374.7 | 12  |
| 6   | 684.4   | 342.2 | 667.4   | 666.4   | Q  | 1,291.6 | 646.3 | 1,274.6 | 1,273.6 | 11  |
| 7   | 813.4   | 407.2 | 796.4   | 795.4   | E  | 1,163.6 | 582.3 | 1,146.6 | 1,145.6 | 10  |
| 8   | 900.5   | 450.7 | 883.4   | 882.5   | S  | 1,034.5 | 517.8 | 1,017.5 | 1,016.5 | 9   |
| 9   | 1,015.5 | 508.3 | 998.5   | 997.5   | D  | 947.5   | 474.3 | 930.5   | 929.5   | 8   |
| 10  | 1,102.5 | 551.8 | 1,085.5 | 1,084.5 | S  | 832.5   | 416.7 | 815.5   | 814.5   | 7   |
| 11  | 1,230.6 | 615.8 | 1,213.6 | 1,212.6 | K  | 745.4   | 373.2 | 728.4   | 727.4   | 6   |
| 12  | 1,359.7 | 680.3 | 1,342.6 | 1,341.7 | E  | 617.4   |       | 600.3   | 599.3   | 5   |
| 13  | 1,488.7 | 744.9 | 1,471.7 | 1,470.7 | E  | 488.3   |       | 471.3   | 470.3   | 4   |
| 14  | 1,587.8 | 794.4 | 1,570.7 | 1,569.8 | V  | 359.3   |       | 342.2   |         | 3   |
| 15  | 1,700.9 | 850.9 | 1,683.8 | 1,682.8 | I  | 260.2   |       | 243.2   |         | 2   |
| 16  | 1,847.0 | 924.0 | 1,829.9 | 1,829.0 | K  | 147.1   |       | 130.1   |         | 1   |

# Whole proteome

| Protein No. | Leading protein name | Sequence                      | Mascot Score | Variable Modifications   | SILAC State | Charge | m/z       |
|-------------|----------------------|-------------------------------|--------------|--------------------------|-------------|--------|-----------|
| W-6         | sp P40425 PBX2_HUMAN | QATEVLNEYFYSHLSNPYPSEEAKEELAK | 106.71       | Gln->pyro-Glu (N-term Q) | Light       | 3      | 1123.8648 |

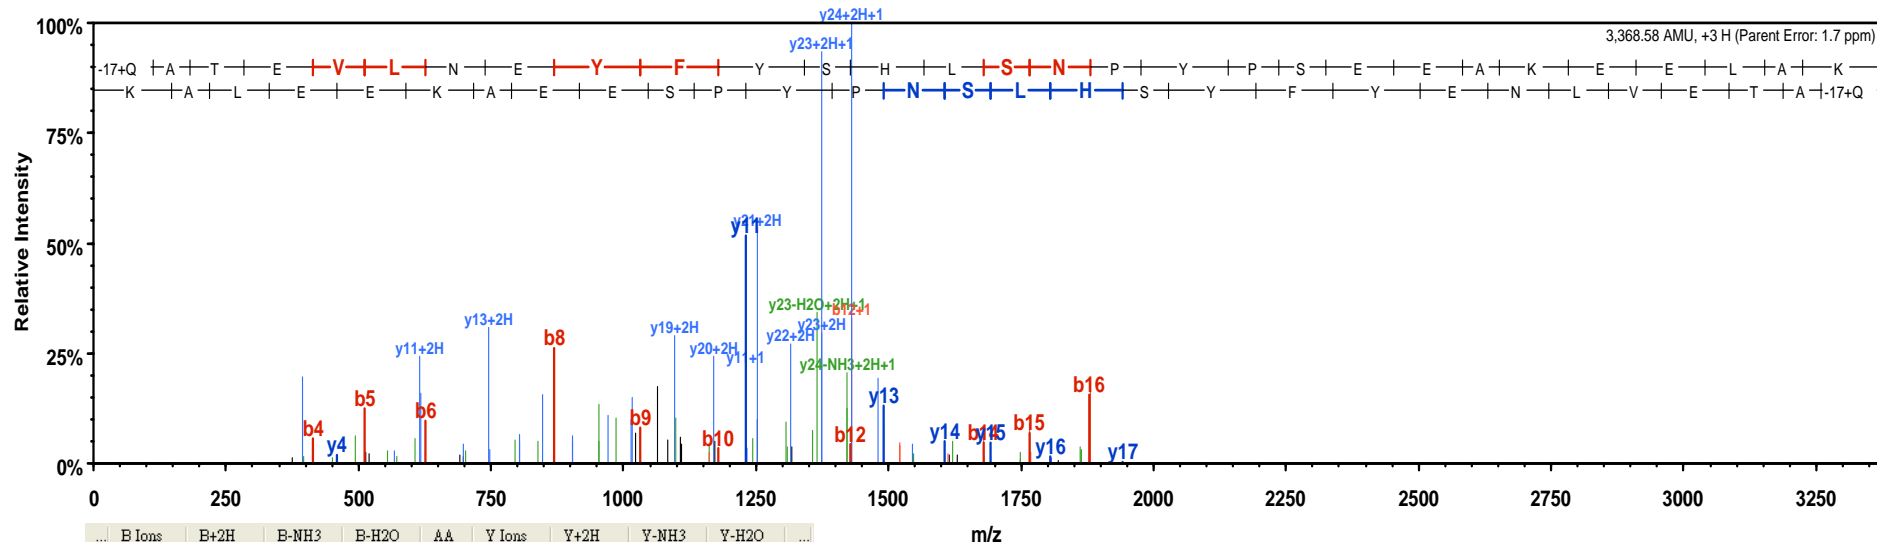

| ... | B Ions  | B+2H    | B-NH3   | B-H2O   | AA   | Y Ions  | Y+2H    | Y-NH3   | Y-H2O   | ... |
|-----|---------|---------|---------|---------|------|---------|---------|---------|---------|-----|
| 1   | 112.0   |         | 95.0    |         | Q-17 | 3,369.6 | 1,685.3 | 3,352.6 | 3,351.6 | 29  |
| 2   | 183.1   |         | 166.0   |         | A    | 3,258.5 | 1,629.8 | 3,241.5 | 3,240.5 | 28  |
| 3   | 284.1   |         | 267.1   | 266.1   | T    | 3,187.5 | 1,594.3 | 3,170.5 | 3,169.5 | 27  |
| 4   | 413.2   |         | 396.1   | 395.2   | E    | 3,086.5 | 1,543.7 | 3,069.4 | 3,068.5 | 26  |
| 5   | 512.2   |         | 495.2   | 494.2   | V    | 2,957.4 | 1,479.2 | 2,940.4 | 2,939.4 | 25  |
| 6   | 625.3   | 313.2   | 608.3   | 607.3   | L    | 2,858.4 | 1,429.7 | 2,841.3 | 2,840.3 | 24  |
| 7   | 739.4   | 370.2   | 722.3   | 721.4   | N    | 2,745.3 | 1,373.1 | 2,728.2 | 2,727.3 | 23  |
| 8   | 868.4   | 434.7   | 851.4   | 850.4   | E    | 2,631.2 | 1,316.1 | 2,614.2 | 2,613.2 | 22  |
| 9   | 1,031.5 | 516.2   | 1,014.4 | 1,013.5 | V    | 2,502.2 | 1,251.6 | 2,485.2 | 2,484.2 | 21  |
| 10  | 1,178.5 | 589.8   | 1,161.5 | 1,160.5 | F    | 2,339.1 | 1,170.1 | 2,322.1 | 2,321.1 | 20  |
| 11  | 1,341.6 | 671.3   | 1,324.6 | 1,323.6 | Y    | 2,192.1 | 1,096.5 | 2,175.0 | 2,174.0 | 19  |
| 12  | 1,428.6 | 714.8   | 1,411.6 | 1,410.6 | S    | 2,029.0 | 1,015.0 | 2,012.0 | 2,011.0 | 18  |
| 13  | 1,565.7 | 783.3   | 1,548.7 | 1,547.7 | H    | 1,942.0 | 971.5   | 1,924.9 | 1,923.9 | 17  |
| 14  | 1,678.8 | 839.9   | 1,661.7 | 1,660.8 | L    | 1,804.9 | 903.0   | 1,787.9 | 1,786.9 | 16  |
| 15  | 1,765.8 | 883.4   | 1,748.8 | 1,747.8 | S    | 1,691.8 | 846.4   | 1,674.8 | 1,673.8 | 15  |
| 16  | 1,879.8 | 940.4   | 1,862.8 | 1,861.8 | N    | 1,604.8 | 802.9   | 1,587.8 | 1,586.8 | 14  |
| 17  | 1,976.9 | 989.0   | 1,959.9 | 1,958.9 | P    | 1,490.7 | 745.9   | 1,473.7 | 1,472.7 | 13  |
| 18  | 2,140.0 | 1,070.5 | 2,122.9 | 2,122.0 | V    | 1,393.7 | 697.3   | 1,376.7 | 1,375.7 | 12  |
| 19  | 2,237.0 | 1,119.0 | 2,220.0 | 2,219.0 | P    | 1,230.6 | 615.8   | 1,213.6 | 1,212.6 | 11  |
| 20  | 2,324.1 | 1,162.5 | 2,307.0 | 2,306.0 | S    | 1,133.6 | 567.3   | 1,116.5 | 1,115.6 | 10  |
| 21  | 2,453.1 | 1,227.1 | 2,436.1 | 2,435.1 | E    | 1,046.5 | 523.8   | 1,029.5 | 1,028.5 | 9   |
| 22  | 2,582.1 | 1,291.6 | 2,565.1 | 2,564.1 | E    | 917.5   | 459.3   | 900.5   | 899.5   | 8   |
| 23  | 2,653.2 | 1,327.1 | 2,636.1 | 2,635.2 | A    | 788.5   | 394.7   | 771.4   | 770.4   | 7   |
| 24  | 2,781.3 | 1,391.1 | 2,764.2 | 2,763.3 | K    | 717.4   | 359.2   | 700.4   | 699.4   | 6   |
| 25  | 2,910.3 | 1,455.7 | 2,893.3 | 2,892.3 | E    | 589.3   |         | 572.3   | 571.3   | 5   |
| 26  | 3,039.4 | 1,520.2 | 3,022.3 | 3,021.3 | E    | 460.3   |         | 443.3   | 442.3   | 4   |
| 27  | 3,152.4 | 1,576.7 | 3,135.4 | 3,134.4 | L    | 331.2   |         | 314.2   |         | 3   |
| 28  | 3,223.5 | 1,612.2 | 3,206.4 | 3,205.4 | A    | 218.1   |         | 201.1   |         | 2   |
| 29  | 3,369.6 | 1,685.3 | 3,352.6 | 3,351.6 | K    | 147.1   |         | 130.1   |         | 1   |

# Whole proteome

| Protein No. | Leading protein name  | Sequence                  | Mascot Score | Variable Modifications | SILAC State | Charge | m/z       |
|-------------|-----------------------|---------------------------|--------------|------------------------|-------------|--------|-----------|
| W-7         | sp P41440 S19A1_HUMAN | VYNGAADAASTLLGAITSFAAGFVK | 106.7        | Unmodified             | Light       | 2      | 1208.1314 |

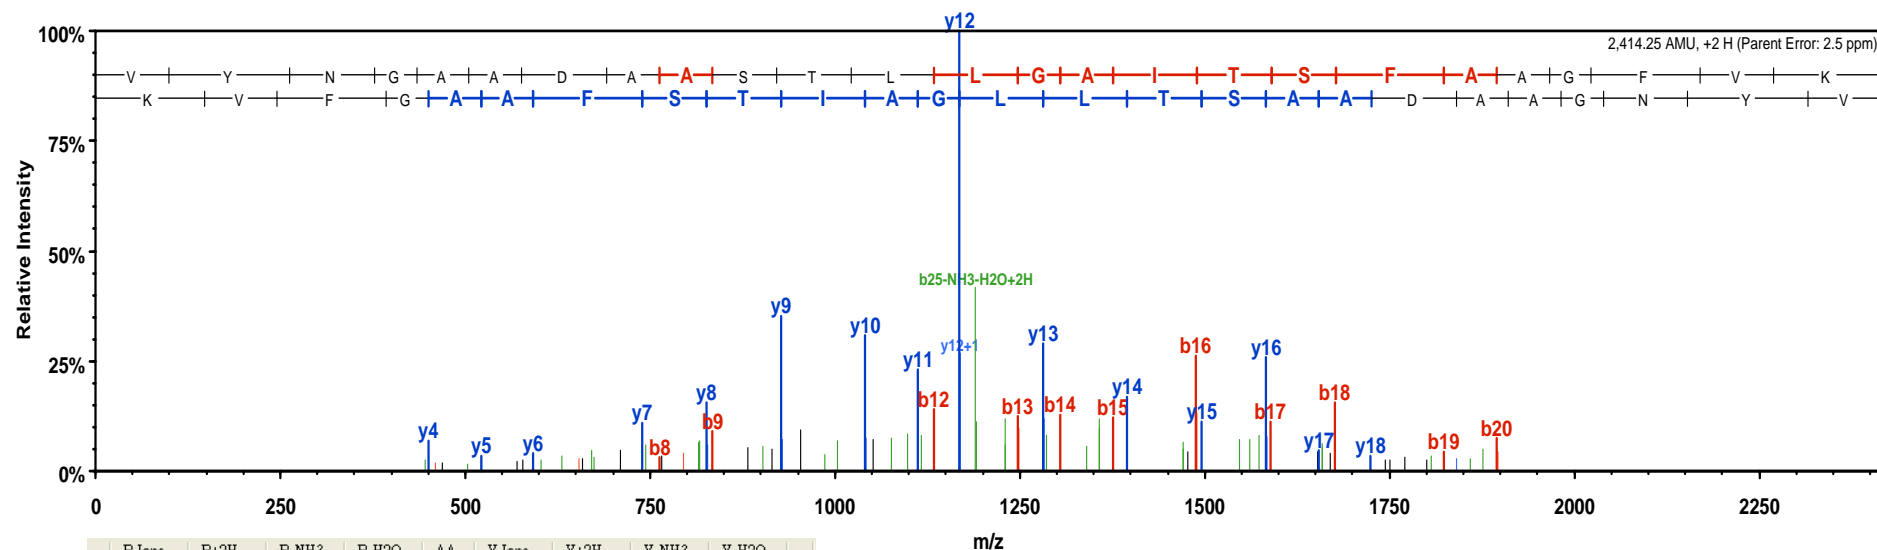

| ... | E Ions  | B+2H    | B-NH3   | B-H2O   | AA | Y Ions  | Y+2H    | Y-NH3   | Y-H2O   | ... |
|-----|---------|---------|---------|---------|----|---------|---------|---------|---------|-----|
| 1   | 100.1   |         |         |         | V  | 2,415.3 | 1,208.1 | 2,398.2 | 2,397.2 | 25  |
| 2   | 263.1   |         |         |         | Y  | 2,316.2 | 1,158.6 | 2,299.2 | 2,298.2 | 24  |
| 3   | 377.2   |         | 360.2   |         | N  | 2,153.1 | 1,077.1 | 2,136.1 | 2,135.1 | 23  |
| 4   | 434.2   |         | 417.2   |         | G  | 2,039.1 | 1,020.0 | 2,022.1 | 2,021.1 | 22  |
| 5   | 505.2   |         | 488.2   |         | A  | 1,982.1 | 991.5   | 1,965.0 | 1,964.0 | 21  |
| 6   | 576.3   | 288.6   | 559.3   |         | A  | 1,911.0 | 956.0   | 1,894.0 | 1,893.0 | 20  |
| 7   | 691.3   | 346.2   | 674.3   | 673.3   | D  | 1,840.0 | 920.5   | 1,823.0 | 1,822.0 | 19  |
| 8   | 762.3   | 381.7   | 745.3   | 744.3   | A  | 1,725.0 | 863.0   | 1,707.9 | 1,706.9 | 18  |
| 9   | 833.4   | 417.2   | 816.4   | 815.4   | A  | 1,653.9 | 827.5   | 1,636.9 | 1,635.9 | 17  |
| 10  | 920.4   | 460.7   | 903.4   | 902.4   | S  | 1,582.9 | 791.9   | 1,565.9 | 1,564.9 | 16  |
| 11  | 1,021.5 | 511.2   | 1,004.4 | 1,003.4 | T  | 1,495.9 | 748.4   | 1,478.8 | 1,477.8 | 15  |
| 12  | 1,134.5 | 567.8   | 1,117.5 | 1,116.5 | L  | 1,394.8 | 697.9   | 1,377.8 | 1,376.8 | 14  |
| 13  | 1,247.6 | 624.3   | 1,230.6 | 1,229.6 | L  | 1,281.7 | 641.4   | 1,264.7 | 1,263.7 | 13  |
| 14  | 1,304.6 | 652.8   | 1,287.6 | 1,286.6 | G  | 1,168.6 | 584.8   | 1,151.6 | 1,150.6 | 12  |
| 15  | 1,375.7 | 688.3   | 1,358.7 | 1,357.7 | A  | 1,111.6 | 556.3   | 1,094.6 | 1,093.6 | 11  |
| 16  | 1,488.8 | 744.9   | 1,471.7 | 1,470.8 | I  | 1,040.6 | 520.8   | 1,023.6 | 1,022.6 | 10  |
| 17  | 1,589.8 | 795.4   | 1,572.8 | 1,571.8 | T  | 927.5   | 464.3   | 910.5   | 909.5   | 9   |
| 18  | 1,676.8 | 838.9   | 1,659.8 | 1,658.8 | S  | 826.4   | 413.7   | 809.4   | 808.4   | 8   |
| 19  | 1,823.9 | 912.5   | 1,806.9 | 1,805.9 | F  | 739.4   | 370.2   | 722.4   |         | 7   |
| 20  | 1,895.0 | 948.0   | 1,877.9 | 1,876.9 | A  | 592.3   | 296.7   | 575.3   |         | 6   |
| 21  | 1,966.0 | 983.5   | 1,949.0 | 1,948.0 | A  | 521.3   |         | 504.3   |         | 5   |
| 22  | 2,023.0 | 1,012.0 | 2,006.0 | 2,005.0 | G  | 450.3   |         | 433.2   |         | 4   |
| 23  | 2,170.1 | 1,085.5 | 2,153.1 | 2,152.1 | F  | 393.2   |         | 376.2   |         | 3   |
| 24  | 2,269.1 | 1,135.1 | 2,252.1 | 2,251.1 | V  | 246.2   |         | 229.2   |         | 2   |
| 25  | 2,415.3 | 1,208.1 | 2,398.2 | 2,397.2 | K  | 147.1   |         | 130.1   |         | 1   |

# Whole proteome

| Protein No. | Leading protein name  | Sequence               | Mascot Score | Variable Modifications | SILAC State | Charge | m/z       |
|-------------|-----------------------|------------------------|--------------|------------------------|-------------|--------|-----------|
| W-8         | sp O60830 TI17B_HUMAN | GKEDPWNSITSGALTGAVLAAR | 103.67       | Unmodified             | Heavy       | 2      | 1107.5793 |

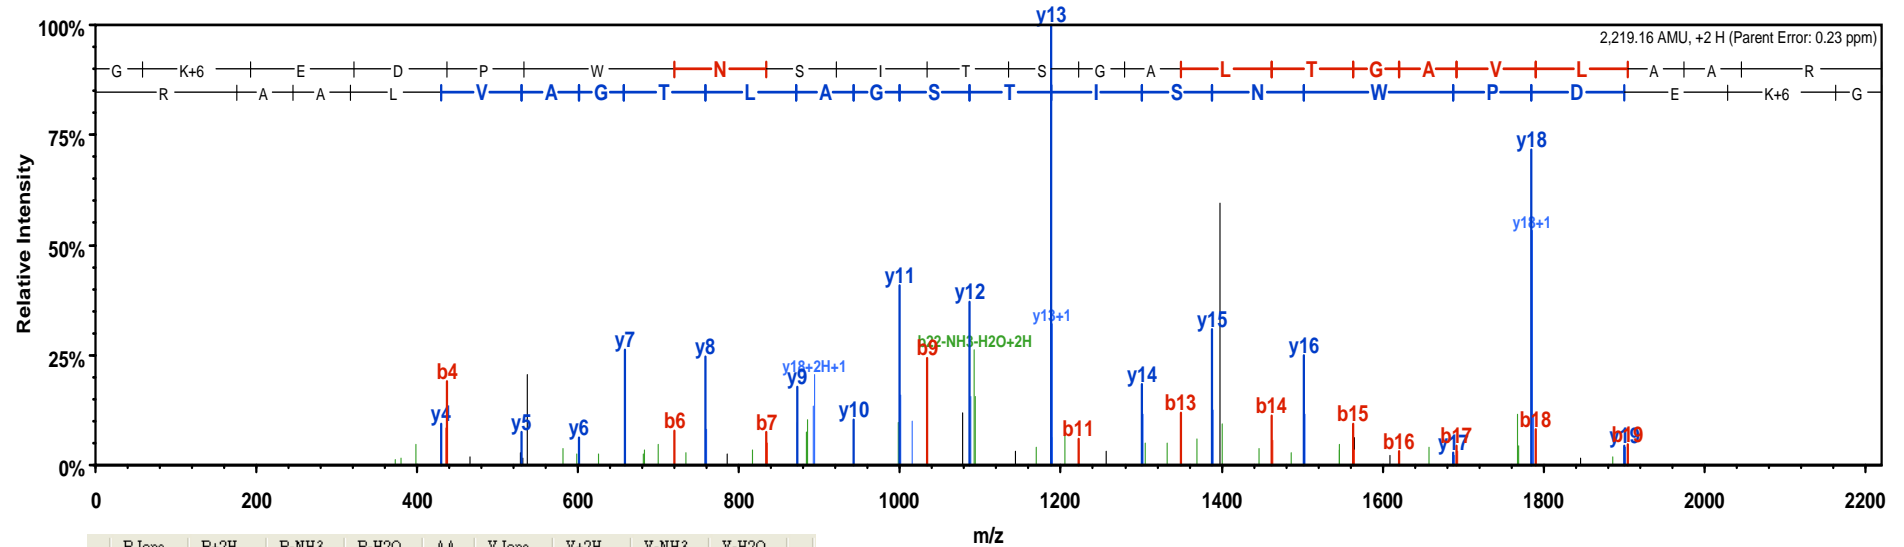

| ... | B Ions  | B+2H    | B-NH3   | B-H2O   | AA  | Y Ions  | Y+2H    | Y-NH3   | Y-H2O   | ... |
|-----|---------|---------|---------|---------|-----|---------|---------|---------|---------|-----|
| 1   | 58.0    |         |         |         | G   | 2,220.2 | 1,110.6 | 2,203.1 | 2,202.2 | 22  |
| 2   | 192.1   | 96.6    | 175.1   |         | K+6 | 2,163.2 | 1,082.1 | 2,146.1 | 2,145.1 | 21  |
| 3   | 321.2   | 161.1   | 304.2   | 303.2   | E   | 2,029.0 | 1,015.0 | 2,012.0 | 2,011.0 | 20  |
| 4   | 436.2   | 218.6   | 419.2   | 418.2   | D   | 1,900.0 | 950.5   | 1,883.0 | 1,882.0 | 19  |
| 5   | 533.3   | 267.1   | 516.2   | 515.3   | P   | 1,785.0 | 893.0   | 1,767.9 | 1,767.0 | 18  |
| 6   | 719.3   | 360.2   | 702.3   | 701.3   | W   | 1,687.9 | 844.5   | 1,670.9 | 1,669.9 | 17  |
| 7   | 833.4   | 417.2   | 816.4   | 815.4   | N   | 1,501.8 | 751.4   | 1,484.9 | 1,483.8 | 16  |
| 8   | 920.4   | 460.7   | 903.4   | 902.4   | S   | 1,387.8 | 694.4   | 1,370.8 | 1,369.8 | 15  |
| 9   | 1,033.5 | 517.3   | 1,016.5 | 1,015.5 | I   | 1,300.8 | 650.9   | 1,283.7 | 1,282.7 | 14  |
| 10  | 1,134.6 | 567.8   | 1,117.5 | 1,116.5 | T   | 1,187.7 | 594.3   | 1,170.6 | 1,169.7 | 13  |
| 11  | 1,221.6 | 611.3   | 1,204.6 | 1,203.6 | S   | 1,086.6 | 543.8   | 1,069.6 | 1,068.6 | 12  |
| 12  | 1,278.6 | 639.8   | 1,261.6 | 1,260.6 | G   | 999.6   | 500.3   | 982.6   | 981.6   | 11  |
| 13  | 1,349.6 | 675.3   | 1,332.6 | 1,331.6 | A   | 942.6   | 471.8   | 925.5   | 924.6   | 10  |
| 14  | 1,462.7 | 731.9   | 1,445.7 | 1,444.7 | L   | 871.5   | 436.3   | 854.5   | 853.5   | 9   |
| 15  | 1,563.8 | 782.4   | 1,546.7 | 1,545.8 | T   | 758.5   | 379.7   | 741.4   | 740.4   | 8   |
| 16  | 1,620.8 | 810.9   | 1,603.8 | 1,602.8 | G   | 657.4   | 329.2   | 640.4   |         | 7   |
| 17  | 1,691.8 | 846.4   | 1,674.8 | 1,673.8 | A   | 600.4   | 300.7   | 583.4   |         | 6   |
| 18  | 1,790.9 | 896.0   | 1,773.9 | 1,772.9 | V   | 529.3   |         | 512.3   |         | 5   |
| 19  | 1,904.0 | 952.5   | 1,887.0 | 1,886.0 | L   | 430.3   |         | 413.3   |         | 4   |
| 20  | 1,975.0 | 988.0   | 1,958.0 | 1,957.0 | A   | 317.2   |         | 300.2   |         | 3   |
| 21  | 2,046.1 | 1,023.5 | 2,029.0 | 2,028.0 | A   | 246.2   |         | 229.1   |         | 2   |
| 22  | 2,220.2 | 1,110.6 | 2,203.1 | 2,202.2 | R   | 175.1   |         | 158.1   |         | 1   |

# Whole proteome

| Protein No. | Leading protein name | Sequence      | Mascot Score | Variable Modifications | SILAC State | Charge | m/z       |
|-------------|----------------------|---------------|--------------|------------------------|-------------|--------|-----------|
| W-9         | spIP07305IH10_HUMAN  | YSDMIVAAIQAEK | 102.69       | Unmodified             | Heavy       | 2      | 719.86596 |

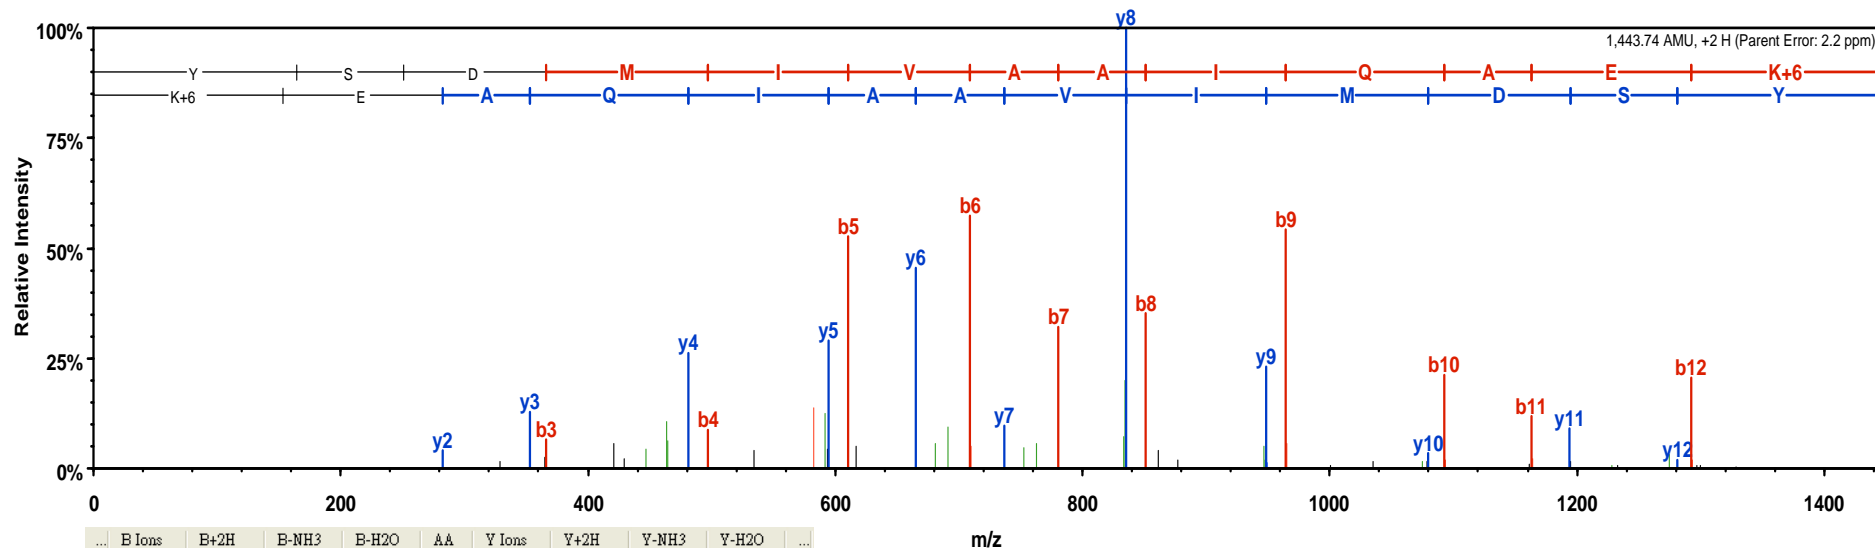

| ... | B Ions  | B+2H  | B-NH3   | B-H2O   | AA  | Y Ions  | Y+2H  | Y-NH3   | Y-H2O   | ... |
|-----|---------|-------|---------|---------|-----|---------|-------|---------|---------|-----|
| 1   | 164.1   |       |         |         | Y   | 1,444.7 | 722.9 | 1,427.7 | 1,426.7 | 13  |
| 2   | 251.1   |       |         | 233.1   | S   | 1,281.7 | 641.3 | 1,264.7 | 1,263.7 | 12  |
| 3   | 366.1   |       |         | 348.1   | D   | 1,194.6 | 597.8 | 1,177.6 | 1,176.6 | 11  |
| 4   | 497.2   |       |         | 479.2   | M   | 1,079.6 | 540.3 | 1,062.6 | 1,061.6 | 10  |
| 5   | 610.3   |       |         | 592.2   | I   | 948.6   | 474.8 | 931.6   | 930.6   | 9   |
| 6   | 709.3   | 355.2 |         | 691.3   | V   | 835.5   | 418.3 | 818.5   | 817.5   | 8   |
| 7   | 780.4   | 390.7 |         | 762.3   | A   | 736.4   | 368.7 | 719.4   | 718.4   | 7   |
| 8   | 851.4   | 426.2 |         | 833.4   | A   | 665.4   | 333.2 | 648.4   | 647.4   | 6   |
| 9   | 964.5   | 482.7 |         | 946.5   | I   | 594.4   |       | 577.3   | 576.3   | 5   |
| 10  | 1,092.5 | 546.8 | 1,075.5 | 1,074.5 | Q   | 481.3   |       | 464.2   | 463.3   | 4   |
| 11  | 1,163.6 | 582.3 | 1,146.6 | 1,145.6 | A   | 353.2   |       | 336.2   | 335.2   | 3   |
| 12  | 1,292.6 | 646.8 | 1,275.6 | 1,274.6 | E   | 282.2   |       | 265.1   | 264.2   | 2   |
| 13  | 1,444.7 | 722.9 | 1,427.7 | 1,426.7 | K+6 | 153.1   |       | 136.1   |         | 1   |

# Whole proteome

| Protein No. | Leading protein name | Sequence                         | Mascot Score | Variable Modifications | SILAC State | Charge | m/z       |
|-------------|----------------------|----------------------------------|--------------|------------------------|-------------|--------|-----------|
| W-10        | splP68431IH31_HUMAN  | FQSSAVMALQEACEAYLVGLFEDTNLCAIHAK | 102.32       | Unmodified             | Light       | 3      | 1196.2387 |

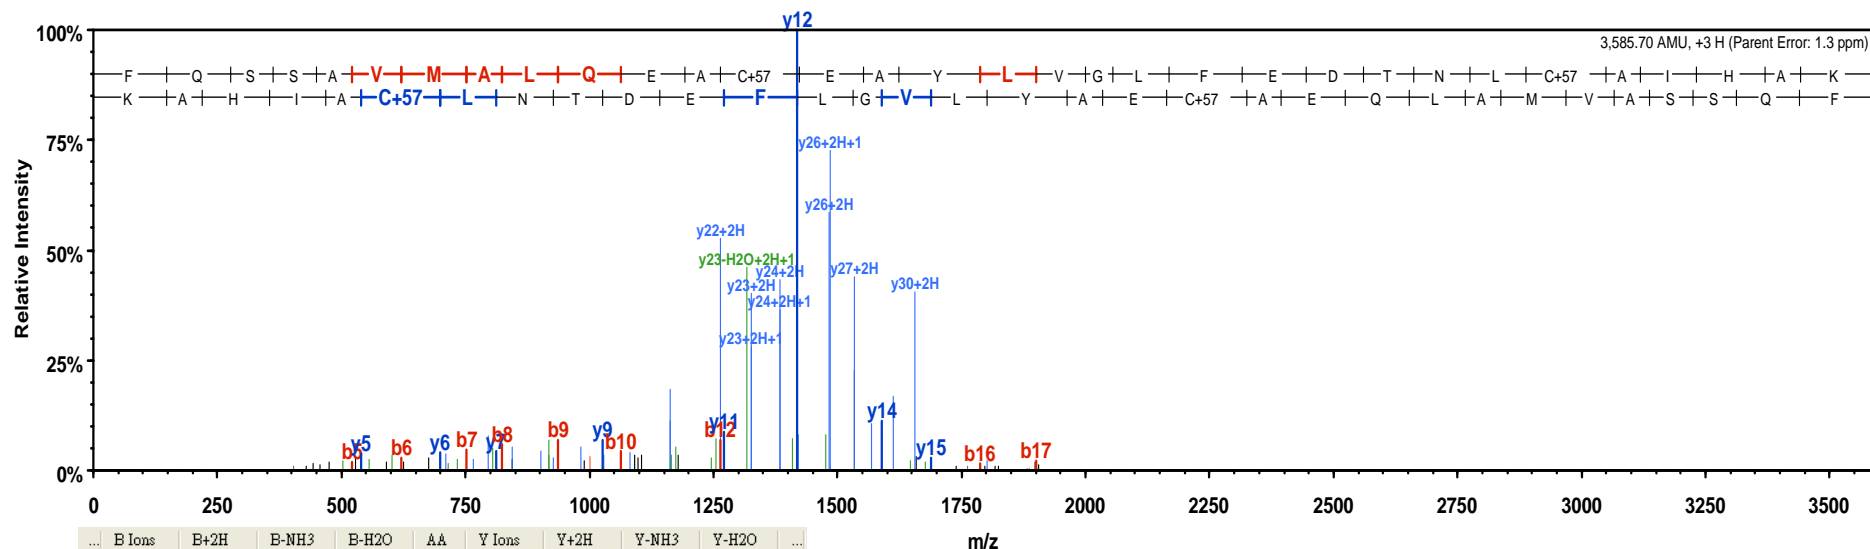

| ... | B Ions  | B+2H    | B-NH3   | B-H2O   | AA   | Y Ions  | Y+2H    | Y-NH3   | Y-H2O   | ... |
|-----|---------|---------|---------|---------|------|---------|---------|---------|---------|-----|
| 1   | 148.1   |         |         |         | F    | 3,586.7 | 1,793.9 | 3,569.7 | 3,568.7 | 32  |
| 2   | 276.1   |         | 259.1   |         | Q    | 3,439.6 | 1,720.3 | 3,422.6 | 3,421.6 | 31  |
| 3   | 363.2   |         | 346.1   | 345.2   | S    | 3,311.6 | 1,656.3 | 3,294.5 | 3,293.6 | 30  |
| 4   | 450.2   |         | 433.2   | 432.2   | S    | 3,224.5 | 1,612.8 | 3,207.5 | 3,206.5 | 29  |
| 5   | 521.2   |         | 504.2   | 503.2   | A    | 3,137.5 | 1,569.3 | 3,120.5 | 3,119.5 | 28  |
| 6   | 620.3   | 310.7   | 603.3   | 602.3   | V    | 3,066.5 | 1,533.7 | 3,049.4 | 3,048.5 | 27  |
| 7   | 751.3   | 376.2   | 734.3   | 733.3   | M    | 2,967.4 | 1,484.2 | 2,950.4 | 2,949.4 | 26  |
| 8   | 822.4   | 411.7   | 805.4   | 804.4   | A    | 2,836.4 | 1,418.7 | 2,819.3 | 2,818.4 | 25  |
| 9   | 935.5   | 468.2   | 918.4   | 917.5   | L    | 2,765.3 | 1,383.2 | 2,748.3 | 2,747.3 | 24  |
| 10  | 1,063.5 | 532.3   | 1,046.5 | 1,045.5 | Q    | 2,652.2 | 1,326.6 | 2,635.2 | 2,634.2 | 23  |
| 11  | 1,192.6 | 596.8   | 1,175.5 | 1,174.6 | E    | 2,524.2 | 1,262.6 | 2,507.2 | 2,506.2 | 22  |
| 12  | 1,263.6 | 632.3   | 1,246.6 | 1,245.6 | A    | 2,395.1 | 1,198.1 | 2,378.1 | 2,377.1 | 21  |
| 13  | 1,423.6 | 712.3   | 1,406.6 | 1,405.6 | C+57 | 2,324.1 | 1,162.6 | 2,307.1 | 2,306.1 | 20  |
| 14  | 1,552.7 | 776.8   | 1,535.7 | 1,534.7 | E    | 2,164.1 | 1,082.5 | 2,147.0 | 2,146.1 | 19  |
| 15  | 1,623.7 | 812.4   | 1,606.7 | 1,605.7 | A    | 2,035.0 | 1,018.0 | 2,018.0 | 2,017.0 | 18  |
| 16  | 1,786.8 | 893.9   | 1,769.8 | 1,768.8 | Y    | 1,964.0 | 982.5   | 1,947.0 | 1,946.0 | 17  |
| 17  | 1,899.9 | 950.4   | 1,882.8 | 1,881.9 | L    | 1,800.9 | 901.0   | 1,783.9 | 1,782.9 | 16  |
| 18  | 1,998.9 | 1,000.0 | 1,981.9 | 1,980.9 | V    | 1,687.8 | 844.4   | 1,670.8 | 1,669.8 | 15  |
| 19  | 2,056.0 | 1,028.5 | 2,038.9 | 2,037.9 | G    | 1,588.8 | 794.9   | 1,571.8 | 1,570.8 | 14  |
| 20  | 2,169.0 | 1,085.0 | 2,152.0 | 2,151.0 | L    | 1,531.8 | 766.4   | 1,514.7 | 1,513.7 | 13  |
| 21  | 2,316.1 | 1,158.6 | 2,299.1 | 2,298.1 | F    | 1,418.7 | 709.8   | 1,401.6 | 1,400.7 | 12  |
| 22  | 2,445.1 | 1,223.1 | 2,428.1 | 2,427.1 | E    | 1,271.6 | 636.3   | 1,254.6 | 1,253.6 | 11  |
| 23  | 2,560.2 | 1,280.6 | 2,543.1 | 2,542.2 | D    | 1,142.6 | 571.8   | 1,125.5 | 1,124.6 | 10  |
| 24  | 2,661.2 | 1,331.1 | 2,644.2 | 2,643.2 | T    | 1,027.5 | 514.3   | 1,010.5 | 1,009.5 | 9   |
| 25  | 2,775.3 | 1,388.1 | 2,758.2 | 2,757.3 | N    | 926.5   | 463.7   | 909.5   |         | 8   |
| 26  | 2,888.3 | 1,444.7 | 2,871.3 | 2,870.3 | L    | 812.4   | 406.7   | 795.4   |         | 7   |
| 27  | 3,048.4 | 1,524.7 | 3,031.4 | 3,030.4 | C+57 | 699.4   | 350.2   | 682.3   |         | 6   |
| 28  | 3,119.4 | 1,560.2 | 3,102.4 | 3,101.4 | A    | 539.3   | 270.2   | 522.3   |         | 5   |
| 29  | 3,232.5 | 1,616.8 | 3,215.5 | 3,214.5 | I    | 468.3   | 234.7   | 451.3   |         | 4   |
| 30  | 3,369.6 | 1,685.3 | 3,352.5 | 3,351.5 | H    | 355.2   | 178.1   | 338.2   |         | 3   |
| 31  | 3,440.6 | 1,720.8 | 3,423.6 | 3,422.6 | A    | 218.1   |         | 201.1   |         | 2   |
| 32  | 3,586.7 | 1,793.9 | 3,569.7 | 3,568.7 | K    | 147.1   |         | 130.1   |         | 1   |

# Whole proteome

| Protein No. | Leading protein name | Sequence           | Mascot Score | Variable Modifications  | SILAC State | Charge | m/z       |
|-------------|----------------------|--------------------|--------------|-------------------------|-------------|--------|-----------|
| W-14        | sp Q07352 TISB_HUMAN | TTTLVSATIFDLSEVLCK | 101.4        | Acetyl (Protein N-term) | Light       | 2      | 1020.5321 |

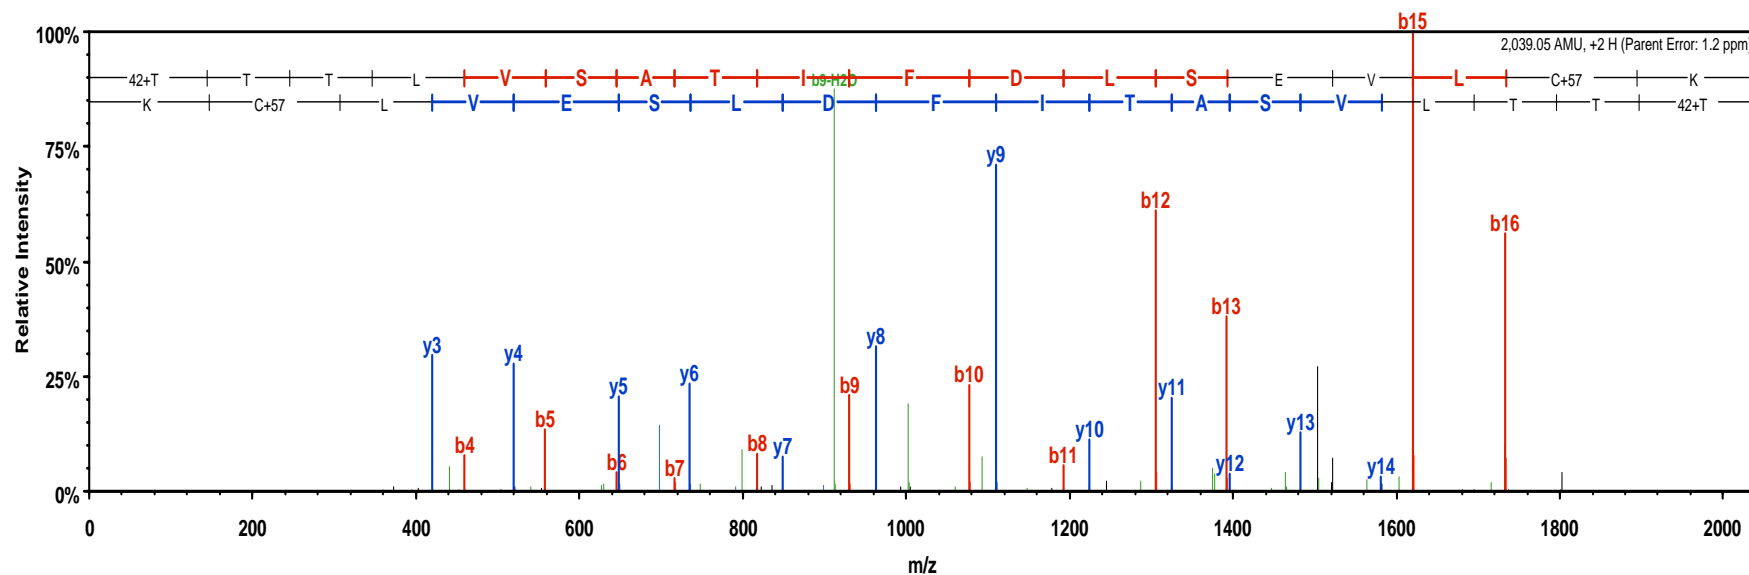

| ... | B Ions  | B+2H    | B-MH3   | B-H2O   | AA   | Y Ions  | Y+2H    | Y-NH3   | Y-H2O   | ... |
|-----|---------|---------|---------|---------|------|---------|---------|---------|---------|-----|
| 1   | 144.1   |         |         | 126.1   | T+42 | 2,040.1 | 1,020.5 | 2,023.0 | 2,022.0 | 18  |
| 2   | 245.1   |         |         | 227.1   | T    | 1,897.0 | 949.0   | 1,880.0 | 1,879.0 | 17  |
| 3   | 346.2   |         |         | 328.2   | T    | 1,796.0 | 898.5   | 1,778.9 | 1,777.9 | 16  |
| 4   | 459.2   |         |         | 441.2   | L    | 1,694.9 | 848.0   | 1,677.9 | 1,676.9 | 15  |
| 5   | 558.3   |         |         | 540.3   | V    | 1,581.8 | 791.4   | 1,564.8 | 1,563.8 | 14  |
| 6   | 645.3   | 323.2   |         | 627.3   | S    | 1,482.8 | 741.9   | 1,465.7 | 1,464.7 | 13  |
| 7   | 716.4   | 358.7   |         | 698.4   | A    | 1,395.7 | 698.4   | 1,378.7 | 1,377.7 | 12  |
| 8   | 817.4   | 409.2   |         | 799.4   | T    | 1,324.7 | 662.8   | 1,307.7 | 1,306.7 | 11  |
| 9   | 930.5   | 465.8   |         | 912.5   | I    | 1,223.6 | 612.3   | 1,206.6 | 1,205.6 | 10  |
| 10  | 1,077.6 | 539.3   |         | 1,059.6 | F    | 1,110.6 | 555.8   | 1,093.5 | 1,092.5 | 9   |
| 11  | 1,192.6 | 596.8   |         | 1,174.6 | D    | 963.5   | 482.2   | 946.5   | 945.5   | 8   |
| 12  | 1,305.7 | 653.4   |         | 1,287.7 | L    | 848.5   | 424.7   | 831.4   | 830.4   | 7   |
| 13  | 1,392.7 | 696.9   |         | 1,374.7 | S    | 735.4   | 368.2   | 718.3   | 717.4   | 6   |
| 14  | 1,521.8 | 761.4   |         | 1,503.8 | E    | 648.3   |         | 631.3   | 630.3   | 5   |
| 15  | 1,620.8 | 810.9   |         | 1,602.8 | V    | 519.3   |         | 502.3   |         | 4   |
| 16  | 1,733.9 | 867.5   |         | 1,715.9 | L    | 420.2   |         | 403.2   |         | 3   |
| 17  | 1,894.0 | 947.5   |         | 1,875.9 | C+57 | 307.1   |         | 290.1   |         | 2   |
| 18  | 2,040.1 | 1,020.5 | 2,023.0 | 2,022.0 | K    | 147.1   |         | 130.1   |         | 1   |

# Whole proteome

| Protein No. | Leading protein name  | Sequence           | Mascot Score | Variable Modifications | SILAC State | Charge | m/z      |
|-------------|-----------------------|--------------------|--------------|------------------------|-------------|--------|----------|
| W-11        | sp Q9NUG6 PDRG1_HUMAN | YLVEVEELAAEEVLADKR | 100.77       | Unmodified             | Light       | 2      | 1003.028 |

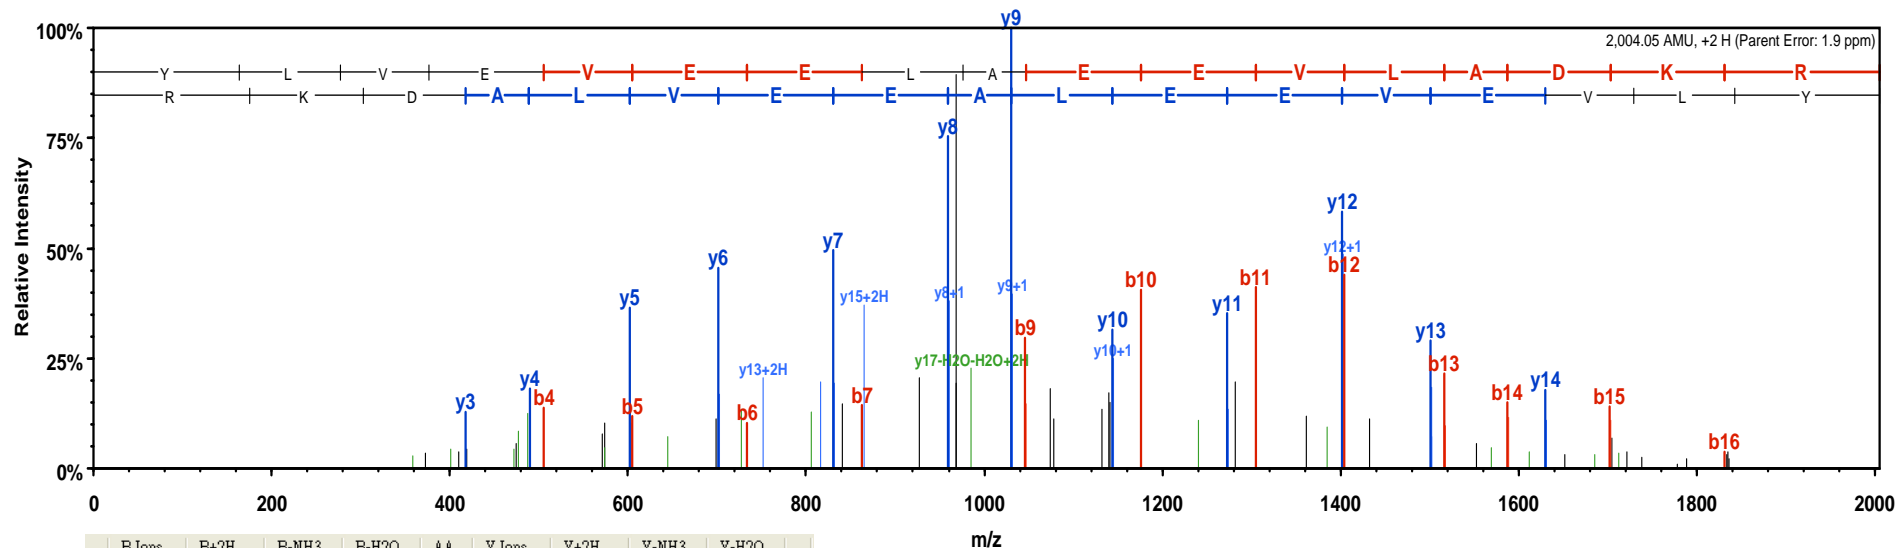

| ... | E Ions  | B+2H    | B-NH3   | B-H2O   | AA | Y Ions  | Y+2H    | Y-NH3   | Y-H2O   | ... |
|-----|---------|---------|---------|---------|----|---------|---------|---------|---------|-----|
| 1   | 164.1   |         |         |         | Y  | 2,005.0 | 1,003.0 | 1,988.0 | 1,987.0 | 17  |
| 2   | 277.2   |         |         |         | L  | 1,842.0 | 921.5   | 1,825.0 | 1,824.0 | 16  |
| 3   | 376.2   |         |         |         | V  | 1,728.9 | 865.0   | 1,711.9 | 1,710.9 | 15  |
| 4   | 505.3   |         |         | 487.3   | E  | 1,629.8 | 815.4   | 1,612.8 | 1,611.8 | 14  |
| 5   | 604.3   |         |         | 586.3   | V  | 1,500.8 | 750.9   | 1,483.8 | 1,482.8 | 13  |
| 6   | 733.4   | 367.2   |         | 715.4   | E  | 1,401.7 | 701.4   | 1,384.7 | 1,383.7 | 12  |
| 7   | 862.4   | 431.7   |         | 844.4   | E  | 1,272.7 | 636.8   | 1,255.7 | 1,254.7 | 11  |
| 8   | 975.5   | 488.3   |         | 957.5   | L  | 1,143.6 | 572.3   | 1,126.6 | 1,125.6 | 10  |
| 9   | 1,046.5 | 523.8   |         | 1,028.5 | A  | 1,030.6 | 515.8   | 1,013.5 | 1,012.5 | 9   |
| 10  | 1,175.6 | 588.3   |         | 1,157.6 | E  | 959.5   | 480.3   | 942.5   | 941.5   | 8   |
| 11  | 1,304.6 | 652.8   |         | 1,286.6 | E  | 830.5   | 415.7   | 813.4   | 812.5   | 7   |
| 12  | 1,403.7 | 702.4   |         | 1,385.7 | V  | 701.4   | 351.2   | 684.4   | 683.4   | 6   |
| 13  | 1,516.8 | 758.9   |         | 1,498.8 | L  | 602.4   | 301.7   | 585.3   | 584.4   | 5   |
| 14  | 1,587.8 | 794.4   |         | 1,569.8 | A  | 489.3   | 245.1   | 472.3   | 471.3   | 4   |
| 15  | 1,702.8 | 851.9   |         | 1,684.8 | D  | 418.2   | 209.6   | 401.2   | 400.2   | 3   |
| 16  | 1,830.9 | 916.0   | 1,813.9 | 1,812.9 | K  | 303.2   | 152.1   | 286.2   |         | 2   |
| 17  | 2,005.0 | 1,003.0 | 1,988.0 | 1,987.0 | R  | 175.1   |         | 158.1   |         | 1   |



# Whole proteome

| Protein No. | Leading protein name  | Sequence          | Mascot Score | Variable Modifications | SILAC State | Charge | m/z       |
|-------------|-----------------------|-------------------|--------------|------------------------|-------------|--------|-----------|
| W-12        | sp Q8TCD5 INT5C_HUMAN | TVVLGDLLIDDKDQTVR | 95.01        | Unmodified             | Light       | 2      | 886.49364 |

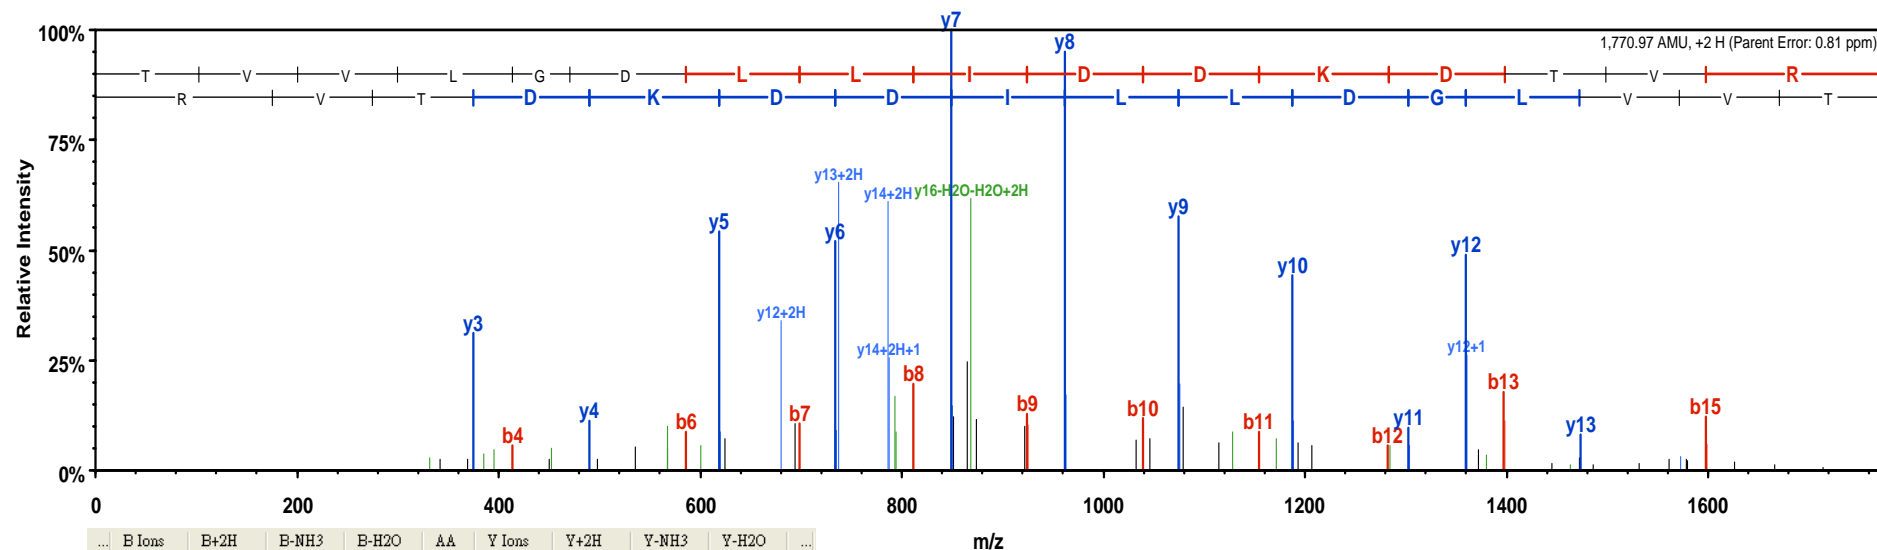

| ... | B Ions  | B+2H  | B-NH3   | B-H2O   | AA | Y Ions  | Y+2H  | Y-NH3   | Y-H2O   | ... |
|-----|---------|-------|---------|---------|----|---------|-------|---------|---------|-----|
| 1   | 102.1   |       |         | 94.0    | T  | 1,772.0 | 886.5 | 1,755.0 | 1,754.0 | 16  |
| 2   | 201.1   |       |         | 183.1   | V  | 1,670.9 | 836.0 | 1,653.9 | 1,652.9 | 15  |
| 3   | 300.2   |       |         | 282.2   | V  | 1,571.9 | 786.4 | 1,554.8 | 1,553.9 | 14  |
| 4   | 413.3   |       |         | 395.3   | L  | 1,472.8 | 736.9 | 1,455.8 | 1,454.8 | 13  |
| 5   | 470.3   |       |         | 452.3   | G  | 1,359.7 | 680.4 | 1,342.7 | 1,341.7 | 12  |
| 6   | 585.3   | 293.2 |         | 567.3   | D  | 1,302.7 | 651.8 | 1,285.7 | 1,284.7 | 11  |
| 7   | 698.4   | 349.7 |         | 680.4   | L  | 1,187.7 | 594.3 | 1,170.6 | 1,169.7 | 10  |
| 8   | 811.5   | 406.2 |         | 793.5   | L  | 1,074.6 | 537.8 | 1,057.6 | 1,056.6 | 9   |
| 9   | 924.6   | 462.8 |         | 906.6   | I  | 961.5   | 481.3 | 944.5   | 943.5   | 8   |
| 10  | 1,039.6 | 520.3 |         | 1,021.6 | D  | 848.4   | 424.7 | 831.4   | 830.4   | 7   |
| 11  | 1,154.6 | 577.8 |         | 1,136.6 | D  | 733.4   | 367.2 | 716.4   | 715.4   | 6   |
| 12  | 1,282.7 | 641.9 | 1,265.7 | 1,264.7 | K  | 618.4   | 309.7 | 601.3   | 600.3   | 5   |
| 13  | 1,397.8 | 699.4 | 1,380.7 | 1,379.7 | D  | 490.3   |       | 473.2   | 472.3   | 4   |
| 14  | 1,498.8 | 749.9 | 1,481.8 | 1,480.8 | T  | 375.2   |       | 358.2   | 357.2   | 3   |
| 15  | 1,597.9 | 799.4 | 1,580.8 | 1,579.9 | V  | 274.2   |       | 257.2   |         | 2   |
| 16  | 1,772.0 | 886.5 | 1,755.0 | 1,754.0 | R  | 175.1   |       | 158.1   |         | 1   |

# Whole proteome

| Protein No. | Leading protein name | Sequence         | Mascot Score | Variable Modifications | SILAC State | Charge | m/z       |
|-------------|----------------------|------------------|--------------|------------------------|-------------|--------|-----------|
| W-13        | splQ9Y5B8INDK7_HUMAN | TKYDNLHLEDLFIGNK | 94.65        | Unmodified             | Light       | 2      | 960.49672 |

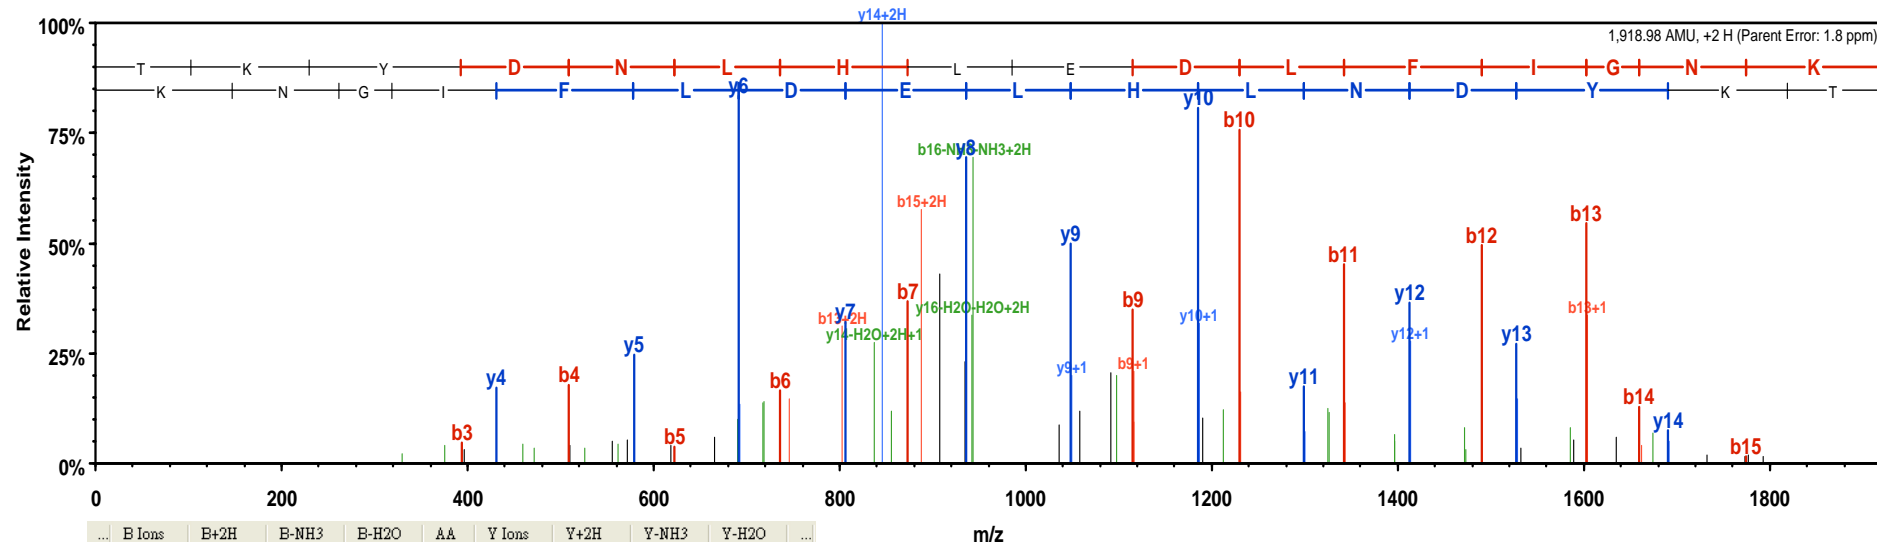

| ... | B Ions  | B+2H  | B-NH3   | B-H2O   | AA | Y Ions  | Y+2H  | Y-NH3   | Y-H2O   | ... |
|-----|---------|-------|---------|---------|----|---------|-------|---------|---------|-----|
| 1   | 102.1   |       |         | 94.0    | T  | 1,920.0 | 960.5 | 1,903.0 | 1,902.0 | 16  |
| 2   | 230.1   | 115.6 | 213.1   | 212.1   | K  | 1,818.9 | 910.0 | 1,801.9 | 1,800.9 | 15  |
| 3   | 393.2   | 197.1 | 376.2   | 375.2   | Y  | 1,690.8 | 845.9 | 1,673.8 | 1,672.8 | 14  |
| 4   | 508.2   | 254.6 | 491.2   | 490.2   | D  | 1,527.8 | 764.4 | 1,510.8 | 1,509.8 | 13  |
| 5   | 622.3   | 311.6 | 605.3   | 604.3   | N  | 1,412.8 | 706.9 | 1,395.7 | 1,394.7 | 12  |
| 6   | 735.4   | 368.2 | 718.3   | 717.4   | L  | 1,298.7 | 649.9 | 1,281.7 | 1,280.7 | 11  |
| 7   | 872.4   | 436.7 | 855.4   | 854.4   | H  | 1,185.6 | 593.3 | 1,168.6 | 1,167.6 | 10  |
| 8   | 985.5   | 493.3 | 968.5   | 967.5   | L  | 1,048.6 | 524.8 | 1,031.5 | 1,030.6 | 9   |
| 9   | 1,114.6 | 557.8 | 1,097.5 | 1,096.5 | E  | 935.5   | 468.2 | 918.5   | 917.5   | 8   |
| 10  | 1,229.6 | 615.3 | 1,212.6 | 1,211.6 | D  | 806.4   | 403.7 | 789.4   | 788.4   | 7   |
| 11  | 1,342.7 | 671.8 | 1,325.6 | 1,324.7 | L  | 691.4   | 346.2 | 674.4   |         | 6   |
| 12  | 1,489.7 | 745.4 | 1,472.7 | 1,471.7 | F  | 578.3   |       | 561.3   |         | 5   |
| 13  | 1,602.8 | 801.9 | 1,585.8 | 1,584.8 | I  | 431.3   |       | 414.2   |         | 4   |
| 14  | 1,659.8 | 830.4 | 1,642.8 | 1,641.8 | G  | 318.2   |       | 301.2   |         | 3   |
| 15  | 1,773.9 | 887.4 | 1,756.9 | 1,755.9 | N  | 261.2   |       | 244.1   |         | 2   |
| 16  | 1,920.0 | 960.5 | 1,903.0 | 1,902.0 | K  | 147.1   |       | 130.1   |         | 1   |

# Whole proteome

| Protein No. | Leading protein name | Sequence            | Mascot Score | Variable Modifications | SILAC State | Charge | m/z       |
|-------------|----------------------|---------------------|--------------|------------------------|-------------|--------|-----------|
| W-14        | sp P80297 MT1X_HUMAN | MDPNCSCSPVGCACAGSCK | 94.53        | Unmodified             | Heavy       | 2      | 1102.9014 |

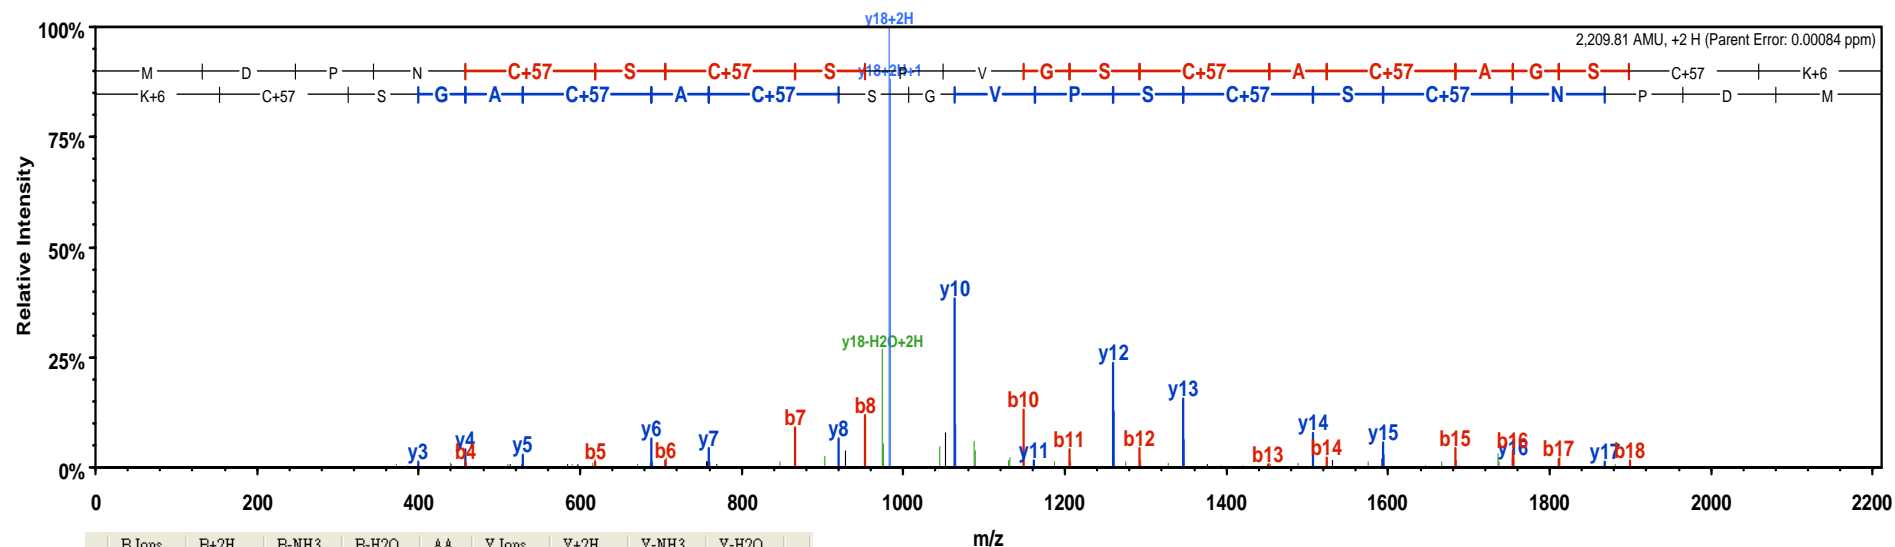

| ... | B Ions  | B+2H    | B-NH3   | B-H2O   | AA   | Y Ions  | Y+2H    | Y-NH3   | Y-H2O   | ... |
|-----|---------|---------|---------|---------|------|---------|---------|---------|---------|-----|
| 1   | 132.0   |         |         |         | M    | 2,210.8 | 1,105.9 | 2,193.8 | 2,192.8 | 20  |
| 2   | 247.1   |         |         | 229.1   | D    | 2,079.8 | 1,040.4 | 2,062.7 | 2,061.8 | 19  |
| 3   | 344.1   |         |         | 326.1   | P    | 1,964.7 | 982.9   | 1,947.7 | 1,946.7 | 18  |
| 4   | 458.2   |         | 441.1   | 440.2   | N    | 1,867.7 | 934.4   | 1,850.7 | 1,849.7 | 17  |
| 5   | 618.2   |         | 601.2   | 600.2   | C+57 | 1,753.7 | 877.3   | 1,736.6 | 1,735.6 | 16  |
| 6   | 705.2   | 353.1   | 688.2   | 687.2   | S    | 1,593.6 | 797.3   | 1,576.6 | 1,575.6 | 15  |
| 7   | 865.3   | 433.1   | 848.2   | 847.3   | C+57 | 1,506.6 | 753.8   | 1,489.6 | 1,488.6 | 14  |
| 8   | 952.3   | 476.7   | 935.3   | 934.3   | S    | 1,346.6 | 673.8   | 1,329.5 | 1,328.5 | 13  |
| 9   | 1,049.3 | 525.2   | 1,032.3 | 1,031.3 | P    | 1,259.5 | 630.3   | 1,242.5 | 1,241.5 | 12  |
| 10  | 1,148.4 | 574.7   | 1,131.4 | 1,130.4 | V    | 1,162.5 | 581.7   | 1,145.4 | 1,144.5 | 11  |
| 11  | 1,205.4 | 603.2   | 1,188.4 | 1,187.4 | G    | 1,063.4 | 532.2   | 1,046.4 | 1,045.4 | 10  |
| 12  | 1,292.5 | 646.7   | 1,275.4 | 1,274.5 | S    | 1,006.4 | 503.7   | 989.4   | 988.4   | 9   |
| 13  | 1,452.5 | 726.8   | 1,435.5 | 1,434.5 | C+57 | 919.4   | 460.2   | 902.3   | 901.3   | 8   |
| 14  | 1,523.5 | 762.3   | 1,506.5 | 1,505.5 | A    | 759.3   | 380.2   | 742.3   | 741.3   | 7   |
| 15  | 1,683.6 | 842.3   | 1,666.5 | 1,665.6 | C+57 | 688.3   | 344.6   | 671.3   | 670.3   | 6   |
| 16  | 1,754.6 | 877.8   | 1,737.6 | 1,736.6 | A    | 528.3   |         | 511.2   | 510.2   | 5   |
| 17  | 1,811.6 | 906.3   | 1,794.6 | 1,793.6 | G    | 457.2   |         | 440.2   | 439.2   | 4   |
| 18  | 1,898.7 | 949.8   | 1,881.6 | 1,880.6 | S    | 400.2   |         | 383.2   | 382.2   | 3   |
| 19  | 2,058.7 | 1,029.8 | 2,041.7 | 2,040.7 | C+57 | 313.2   |         | 296.1   |         | 2   |
| 20  | 2,210.8 | 1,105.9 | 2,193.8 | 2,192.8 | K+6  | 153.1   |         | 136.1   |         | 1   |

# Whole proteome

| Protein No. | Leading protein name | Sequence                      | Mascot Score | Variable Modifications | SILAC State | Charge | m/z       |
|-------------|----------------------|-------------------------------|--------------|------------------------|-------------|--------|-----------|
| W-15        | splQ969F9IHPS3_HUMAN | TEEGISNEISQLESDDFVICQKPLELLGK | 94.26        | Unmodified             | Light       | 3      | 1140.8957 |

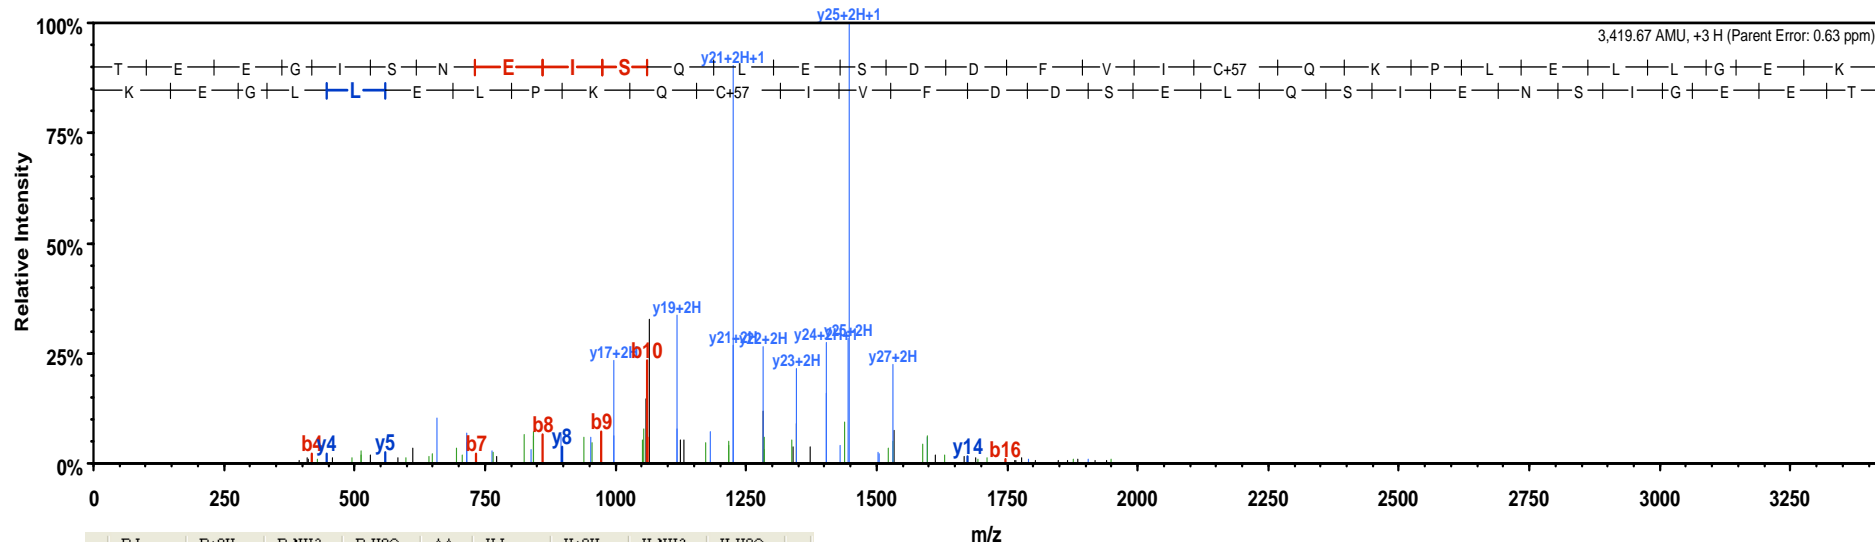

| ... | B Ions  | B+2H    | B-NH3   | B-H2O   | AA   | Y Ions  | Y+2H    | Y-NH3   | Y-H2O   | ... |
|-----|---------|---------|---------|---------|------|---------|---------|---------|---------|-----|
| 1   | 102.1   |         |         | 84.0    | T    | 3,420.7 | 1,710.8 | 3,403.6 | 3,402.7 | 30  |
| 2   | 231.1   |         |         | 213.1   | E    | 3,319.6 | 1,660.3 | 3,302.6 | 3,301.6 | 29  |
| 3   | 360.1   |         |         | 342.1   | E    | 3,190.6 | 1,595.8 | 3,173.6 | 3,172.6 | 28  |
| 4   | 417.2   |         |         | 399.2   | G    | 3,061.5 | 1,531.3 | 3,044.5 | 3,043.5 | 27  |
| 5   | 530.2   |         |         | 512.2   | I    | 3,004.5 | 1,502.8 | 2,987.5 | 2,986.5 | 26  |
| 6   | 617.3   | 309.1   |         | 599.3   | S    | 2,891.4 | 1,446.2 | 2,874.4 | 2,873.4 | 25  |
| 7   | 731.3   | 366.2   | 714.3   | 713.3   | N    | 2,804.4 | 1,402.7 | 2,787.4 | 2,786.4 | 24  |
| 8   | 860.4   | 430.7   | 843.3   | 842.4   | E    | 2,690.4 | 1,345.7 | 2,673.3 | 2,672.3 | 23  |
| 9   | 973.4   | 487.2   | 956.4   | 955.4   | I    | 2,561.3 | 1,281.2 | 2,544.3 | 2,543.3 | 22  |
| 10  | 1,060.5 | 530.7   | 1,043.5 | 1,042.5 | S    | 2,448.2 | 1,224.6 | 2,431.2 | 2,430.2 | 21  |
| 11  | 1,188.5 | 594.8   | 1,171.5 | 1,170.5 | Q    | 2,361.2 | 1,181.1 | 2,344.2 | 2,343.2 | 20  |
| 12  | 1,301.6 | 651.3   | 1,284.6 | 1,283.6 | L    | 2,233.1 | 1,117.1 | 2,216.1 | 2,215.1 | 19  |
| 13  | 1,430.7 | 715.8   | 1,413.6 | 1,412.7 | E    | 2,120.1 | 1,060.5 | 2,103.0 | 2,102.0 | 18  |
| 14  | 1,517.7 | 759.4   | 1,500.7 | 1,499.7 | S    | 1,991.0 | 996.0   | 1,974.0 | 1,973.0 | 17  |
| 15  | 1,632.7 | 816.9   | 1,615.7 | 1,614.7 | D    | 1,904.0 | 952.5   | 1,887.0 | 1,886.0 | 16  |
| 16  | 1,747.8 | 874.4   | 1,730.7 | 1,729.7 | D    | 1,789.0 | 895.0   | 1,771.9 | 1,770.9 | 15  |
| 17  | 1,894.8 | 947.9   | 1,877.8 | 1,876.8 | F    | 1,673.9 | 837.5   | 1,656.9 | 1,655.9 | 14  |
| 18  | 1,993.9 | 997.4   | 1,976.9 | 1,975.9 | V    | 1,526.9 | 763.9   | 1,509.8 | 1,508.9 | 13  |
| 19  | 2,107.0 | 1,054.0 | 2,089.9 | 2,089.0 | I    | 1,427.8 | 714.4   | 1,410.8 | 1,409.8 | 12  |
| 20  | 2,267.0 | 1,134.0 | 2,250.0 | 2,249.0 | C+57 | 1,314.7 | 657.9   | 1,297.7 | 1,296.7 | 11  |
| 21  | 2,395.1 | 1,198.0 | 2,378.0 | 2,377.1 | Q    | 1,154.7 | 577.8   | 1,137.7 | 1,136.7 | 10  |
| 22  | 2,523.2 | 1,262.1 | 2,506.1 | 2,505.1 | K    | 1,026.6 | 513.8   | 1,009.6 | 1,008.6 | 9   |
| 23  | 2,620.2 | 1,310.6 | 2,603.2 | 2,602.2 | P    | 898.5   | 449.8   | 881.5   | 880.5   | 8   |
| 24  | 2,733.3 | 1,367.1 | 2,716.3 | 2,715.3 | L    | 801.5   | 401.2   | 784.4   | 783.5   | 7   |
| 25  | 2,862.3 | 1,431.7 | 2,845.3 | 2,844.3 | E    | 688.4   | 344.7   | 671.4   | 670.4   | 6   |
| 26  | 2,975.4 | 1,488.2 | 2,958.4 | 2,957.4 | L    | 559.3   |         | 542.3   | 541.3   | 5   |
| 27  | 3,088.5 | 1,544.8 | 3,071.5 | 3,070.5 | L    | 446.3   |         | 429.2   | 428.3   | 4   |
| 28  | 3,145.5 | 1,573.3 | 3,128.5 | 3,127.5 | G    | 333.2   |         | 316.2   | 315.2   | 3   |
| 29  | 3,274.6 | 1,637.8 | 3,257.5 | 3,256.6 | E    | 276.2   |         | 259.1   | 258.1   | 2   |
| 30  | 3,420.7 | 1,710.8 | 3,403.6 | 3,402.7 | K    | 147.1   |         | 130.1   |         | 1   |

# Whole proteome

| Protein No. | Leading protein name  | Sequence     | Mascot Score | Variable Modifications | SILAC State | Charge | m/z       |
|-------------|-----------------------|--------------|--------------|------------------------|-------------|--------|-----------|
| W-16        | sp Q9Y3A6 TMED5_HUMAN | LEDILESINSIK | 94.24        | Unmodified             | Light       | 2      | 687.37976 |

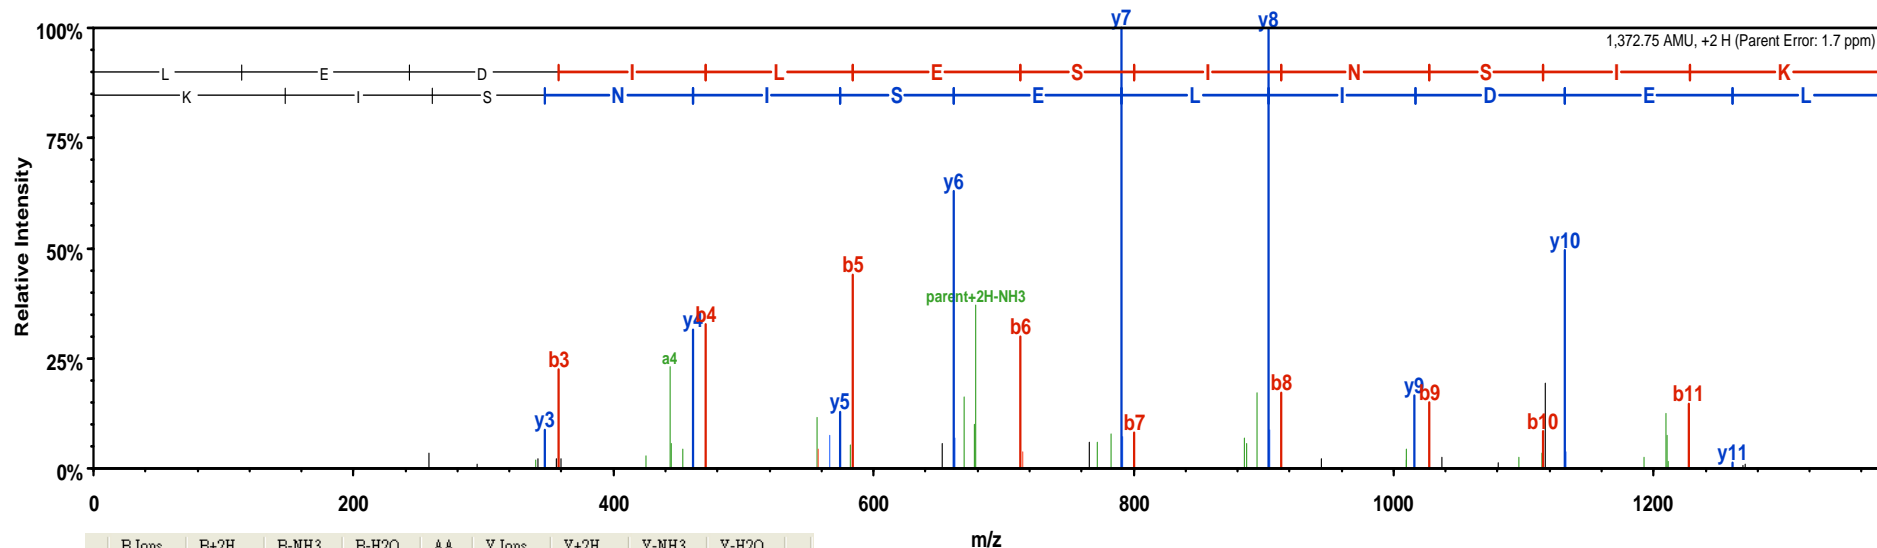

| ... | B Ions  | B+2H  | B-NH3   | B-H2O   | AA | Y Ions  | Y+2H  | Y-NH3   | Y-H2O   | ... |
|-----|---------|-------|---------|---------|----|---------|-------|---------|---------|-----|
| 1   | 114.1   |       |         |         | L  | 1,373.8 | 687.4 | 1,356.7 | 1,355.7 | 12  |
| 2   | 243.1   |       |         | 225.1   | E  | 1,260.7 | 630.8 | 1,243.6 | 1,242.7 | 11  |
| 3   | 358.2   |       |         | 340.2   | D  | 1,131.6 | 566.3 | 1,114.6 | 1,113.6 | 10  |
| 4   | 471.2   |       |         | 453.2   | I  | 1,016.6 | 508.8 | 999.6   | 998.6   | 9   |
| 5   | 584.3   |       |         | 566.3   | L  | 903.5   | 452.3 | 886.5   | 885.5   | 8   |
| 6   | 713.4   | 357.2 |         | 695.4   | E  | 790.4   | 395.7 | 773.4   | 772.4   | 7   |
| 7   | 800.4   | 400.7 |         | 782.4   | S  | 661.4   | 331.2 | 644.4   | 643.4   | 6   |
| 8   | 913.5   | 457.2 |         | 895.5   | I  | 574.4   |       | 557.3   | 556.3   | 5   |
| 9   | 1,027.5 | 514.3 | 1,010.5 | 1,009.5 | N  | 461.3   |       | 444.2   | 443.3   | 4   |
| 10  | 1,114.6 | 557.8 | 1,097.5 | 1,096.6 | S  | 347.2   |       | 330.2   | 329.2   | 3   |
| 11  | 1,227.6 | 614.3 | 1,210.6 | 1,209.6 | I  | 260.2   |       | 243.2   |         | 2   |
| 12  | 1,373.8 | 687.4 | 1,356.7 | 1,355.7 | K  | 147.1   |       | 130.1   |         | 1   |

# Whole proteome

| Protein No. | Leading protein name   | Sequence           | Mascot Score | Variable Modifications | SILAC State | Charge | m/z       |
|-------------|------------------------|--------------------|--------------|------------------------|-------------|--------|-----------|
| W-17        | sp Q9NUN5 ILMBD1_HUMAN | LENTEDIIEVEQHIQTIK | 93.9         | Unmodified             | Heavy       | 2      | 1084.5395 |

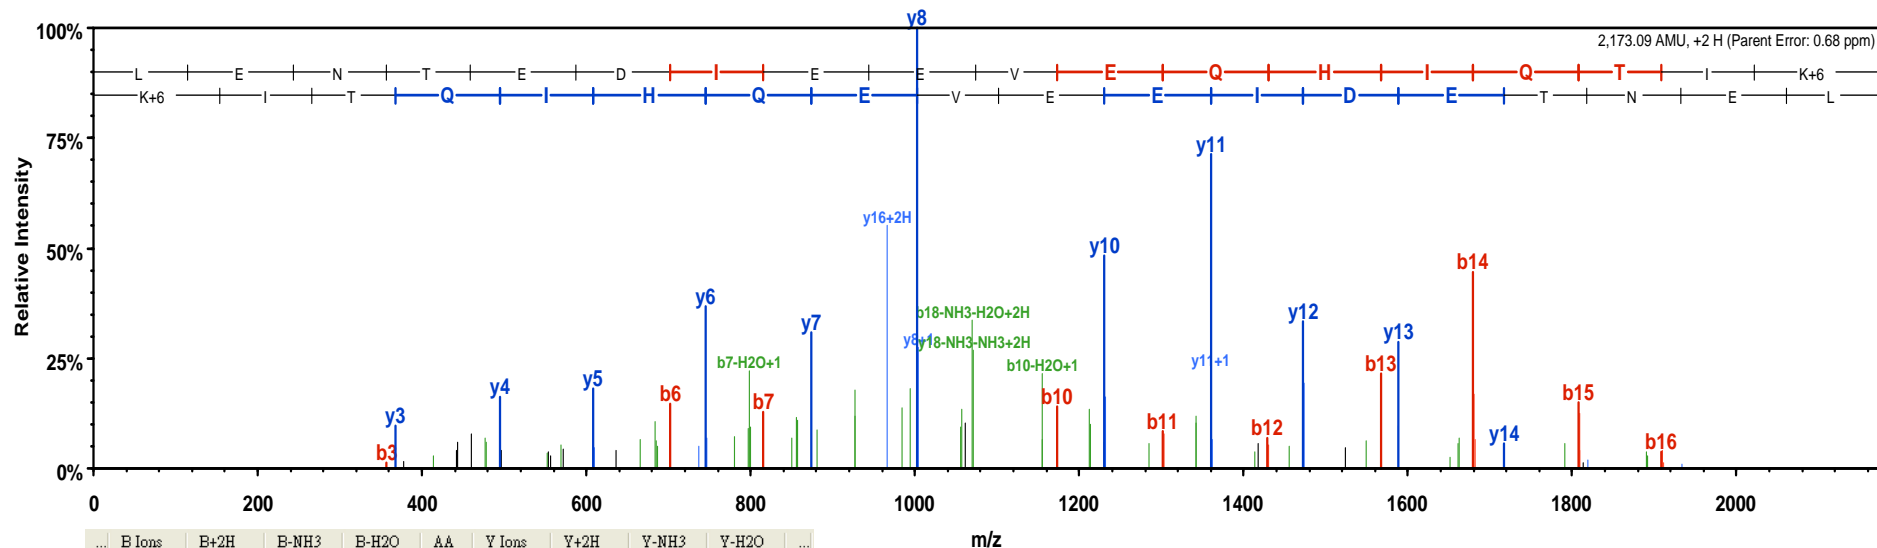

| ... | B Ions  | B+2H    | B-NH3   | B-H2O   | AA  | Y Ions  | Y+2H    | Y-NH3   | Y-H2O   | ... |
|-----|---------|---------|---------|---------|-----|---------|---------|---------|---------|-----|
| 1   | 114.1   |         |         |         | L   | 2,174.1 | 1,087.5 | 2,157.1 | 2,156.1 | 18  |
| 2   | 243.1   |         |         | 225.1   | E   | 2,061.0 | 1,031.0 | 2,044.0 | 2,043.0 | 17  |
| 3   | 357.2   |         | 340.2   | 339.2   | N   | 1,932.0 | 966.5   | 1,914.9 | 1,914.0 | 16  |
| 4   | 458.2   |         | 441.2   | 440.2   | T   | 1,817.9 | 909.5   | 1,800.9 | 1,799.9 | 15  |
| 5   | 587.3   |         | 570.2   | 569.3   | E   | 1,716.9 | 858.9   | 1,699.8 | 1,698.9 | 14  |
| 6   | 702.3   | 351.7   | 685.3   | 684.3   | D   | 1,587.8 | 794.4   | 1,570.8 | 1,569.8 | 13  |
| 7   | 815.4   | 408.2   | 798.4   | 797.4   | I   | 1,472.8 | 736.9   | 1,455.8 | 1,454.8 | 12  |
| 8   | 944.4   | 472.7   | 927.4   | 926.4   | E   | 1,359.7 | 680.4   | 1,342.7 | 1,341.7 | 11  |
| 9   | 1,073.5 | 537.2   | 1,056.4 | 1,055.5 | E   | 1,230.7 | 615.8   | 1,213.7 | 1,212.7 | 10  |
| 10  | 1,172.5 | 586.8   | 1,155.5 | 1,154.5 | V   | 1,101.6 | 551.3   | 1,084.6 | 1,083.6 | 9   |
| 11  | 1,301.6 | 651.3   | 1,284.5 | 1,283.6 | E   | 1,002.6 | 501.8   | 985.5   | 984.6   | 8   |
| 12  | 1,429.6 | 715.3   | 1,412.6 | 1,411.6 | Q   | 873.5   | 437.3   | 856.5   | 855.5   | 7   |
| 13  | 1,566.7 | 783.8   | 1,549.7 | 1,548.7 | H   | 745.5   | 373.2   | 728.4   | 727.5   | 6   |
| 14  | 1,679.8 | 840.4   | 1,662.7 | 1,661.8 | I   | 608.4   |         | 591.4   | 590.4   | 5   |
| 15  | 1,807.8 | 904.4   | 1,790.8 | 1,789.8 | Q   | 495.3   |         | 478.3   | 477.3   | 4   |
| 16  | 1,908.9 | 954.9   | 1,891.9 | 1,890.9 | T   | 367.3   |         | 350.2   | 349.3   | 3   |
| 17  | 2,022.0 | 1,011.5 | 2,004.9 | 2,004.0 | I   | 266.2   |         | 249.2   |         | 2   |
| 18  | 2,174.1 | 1,087.5 | 2,157.1 | 2,156.1 | K+6 | 153.1   |         | 136.1   |         | 1   |

# Whole proteome

| Protein No. | Leading protein name  | Sequence                         | Mascot Score | Variable Modifications | SILAC State | Charge | m/z       |
|-------------|-----------------------|----------------------------------|--------------|------------------------|-------------|--------|-----------|
| W-18        | sp P27449 IVATL_HUMAN | SGPEYASFFAVMGASAAMVFSALGAAAYGTAK | 93.89        | Unmodified             | Light       | 3      | 1010.8174 |

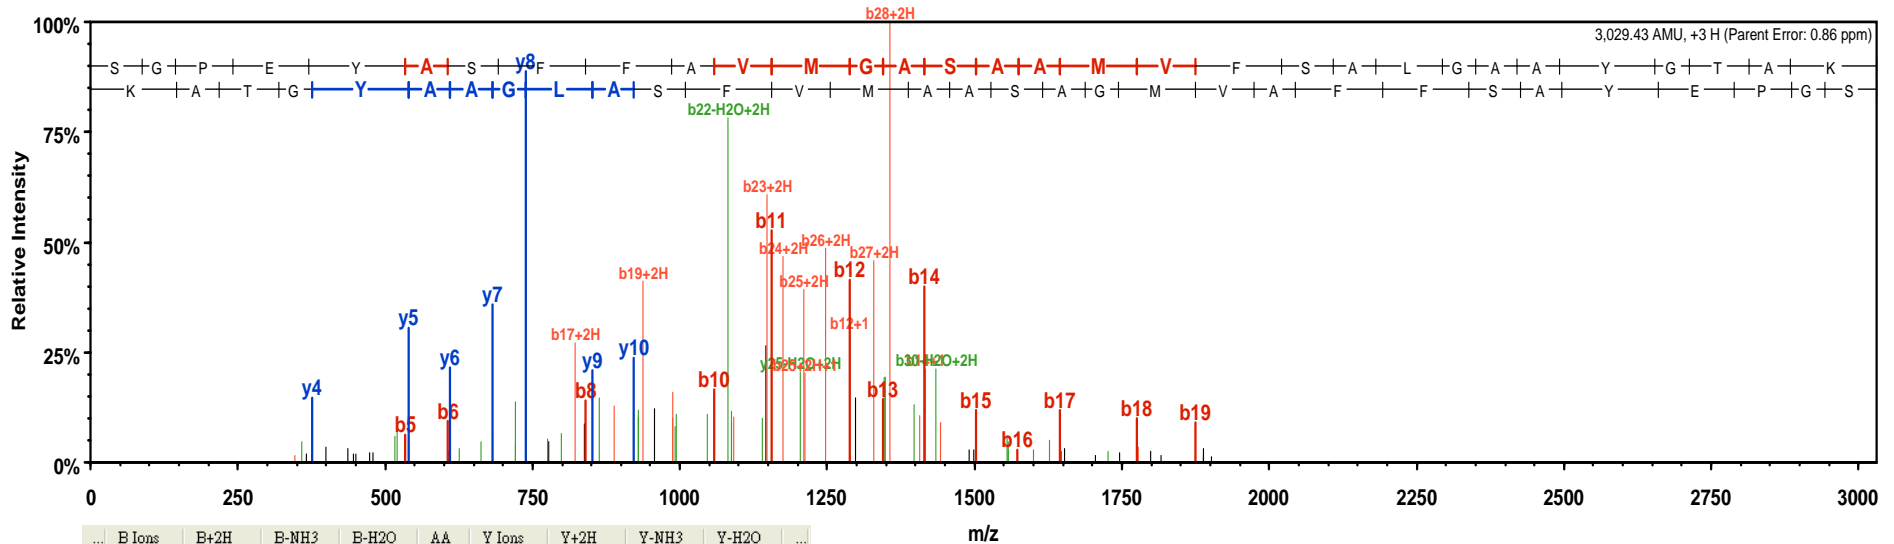

| ... | B Ions  | B+2H    | B-NH3   | B-H2O   | AA | Y Ions  | Y+2H    | Y-NH3   | Y-H2O   | ... |
|-----|---------|---------|---------|---------|----|---------|---------|---------|---------|-----|
| 1   | 88.0    |         |         | 70.0    | S  | 3,030.4 | 1,515.7 | 3,013.4 | 3,012.4 | 31  |
| 2   | 145.1   |         |         | 127.1   | G  | 2,943.4 | 1,472.2 | 2,926.4 | 2,925.4 | 30  |
| 3   | 242.1   |         |         | 224.1   | P  | 2,886.4 | 1,443.7 | 2,869.4 | 2,868.4 | 29  |
| 4   | 371.2   |         |         | 353.1   | E  | 2,789.3 | 1,395.2 | 2,772.3 | 2,771.3 | 28  |
| 5   | 534.2   |         |         | 516.2   | Y  | 2,660.3 | 1,330.6 | 2,643.3 | 2,642.3 | 27  |
| 6   | 605.3   | 303.1   |         | 587.2   | A  | 2,497.2 | 1,249.1 | 2,480.2 | 2,479.2 | 26  |
| 7   | 692.3   | 346.6   |         | 674.3   | S  | 2,426.2 | 1,213.6 | 2,409.2 | 2,408.2 | 25  |
| 8   | 839.4   | 420.2   |         | 821.3   | F  | 2,339.2 | 1,170.1 | 2,322.1 | 2,321.1 | 24  |
| 9   | 986.4   | 493.7   |         | 968.4   | F  | 2,192.1 | 1,096.5 | 2,175.1 | 2,174.1 | 23  |
| 10  | 1,057.5 | 529.2   |         | 1,039.5 | A  | 2,045.0 | 1,023.0 | 2,028.0 | 2,027.0 | 22  |
| 11  | 1,156.5 | 578.8   |         | 1,138.5 | V  | 1,974.0 | 987.5   | 1,957.0 | 1,956.0 | 21  |
| 12  | 1,287.6 | 644.3   |         | 1,269.6 | M  | 1,874.9 | 938.0   | 1,857.9 | 1,856.9 | 20  |
| 13  | 1,344.6 | 672.8   |         | 1,326.6 | G  | 1,743.9 | 872.4   | 1,726.8 | 1,725.9 | 19  |
| 14  | 1,415.6 | 708.3   |         | 1,397.6 | A  | 1,686.9 | 843.9   | 1,669.8 | 1,668.8 | 18  |
| 15  | 1,502.7 | 751.8   |         | 1,484.7 | S  | 1,615.8 | 808.4   | 1,598.8 | 1,597.8 | 17  |
| 16  | 1,573.7 | 787.4   |         | 1,555.7 | A  | 1,528.8 | 764.9   | 1,511.8 | 1,510.8 | 16  |
| 17  | 1,644.7 | 822.9   |         | 1,626.7 | A  | 1,457.7 | 729.4   | 1,440.7 | 1,439.7 | 15  |
| 18  | 1,775.8 | 888.4   |         | 1,757.8 | M  | 1,386.7 | 693.9   | 1,369.7 | 1,368.7 | 14  |
| 19  | 1,874.8 | 937.9   |         | 1,856.8 | V  | 1,255.7 | 628.3   | 1,238.6 | 1,237.7 | 13  |
| 20  | 2,021.9 | 1,011.5 |         | 2,003.9 | F  | 1,156.6 | 578.8   | 1,139.6 | 1,138.6 | 12  |
| 21  | 2,108.9 | 1,055.0 |         | 2,090.9 | S  | 1,009.5 | 505.3   | 992.5   | 991.5   | 11  |
| 22  | 2,180.0 | 1,090.5 |         | 2,162.0 | A  | 922.5   | 461.8   | 905.5   | 904.5   | 10  |
| 23  | 2,293.1 | 1,147.0 |         | 2,275.1 | L  | 851.5   | 426.2   | 834.4   | 833.5   | 9   |
| 24  | 2,350.1 | 1,175.5 |         | 2,332.1 | G  | 738.4   | 369.7   | 721.4   | 720.4   | 8   |
| 25  | 2,421.1 | 1,211.1 |         | 2,403.1 | A  | 681.4   | 341.2   | 664.3   | 663.3   | 7   |
| 26  | 2,492.2 | 1,246.6 |         | 2,474.2 | A  | 610.3   | 305.7   | 593.3   | 592.3   | 6   |
| 27  | 2,655.2 | 1,328.1 |         | 2,637.2 | V  | 539.3   |         | 522.3   | 521.3   | 5   |
| 28  | 2,712.2 | 1,356.6 |         | 2,694.2 | G  | 376.2   |         | 359.2   | 358.2   | 4   |
| 29  | 2,813.3 | 1,407.2 |         | 2,795.3 | T  | 319.2   |         | 302.2   | 301.2   | 3   |
| 30  | 2,884.3 | 1,442.7 |         | 2,866.3 | A  | 218.1   |         | 201.1   |         | 2   |
| 31  | 3,030.4 | 1,515.7 | 3,013.4 | 3,012.4 | K  | 147.1   |         | 130.1   |         | 1   |

# Whole proteome

| Protein No. | Leading protein name  | Sequence        | Mascot Score | Variable Modifications  | SILAC State | Charge | m/z       |
|-------------|-----------------------|-----------------|--------------|-------------------------|-------------|--------|-----------|
| W-19        | sp P06454 IPTMA_HUMAN | SDAAVDTSSSEITTK | 93.65        | Acetyl (Protein N-term) | Heavy       | 2      | 733.84648 |

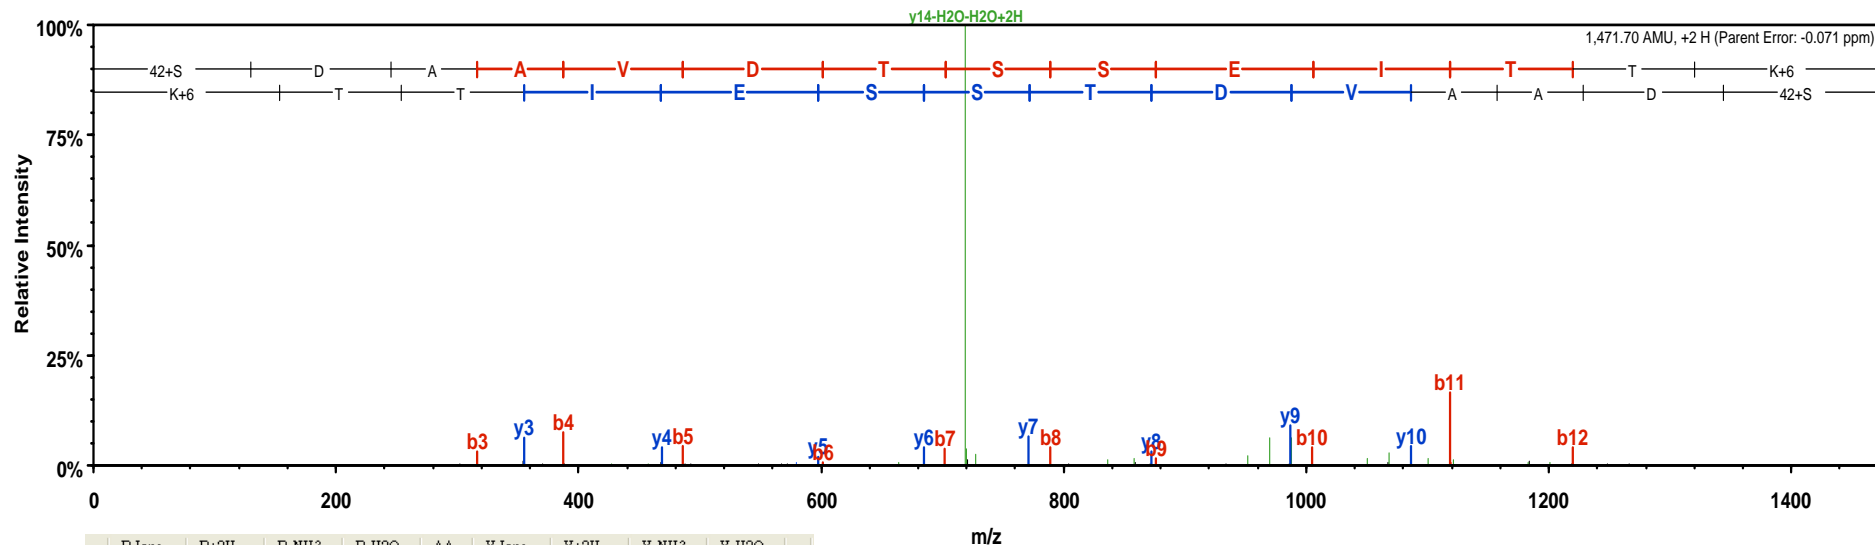

| ... | B Ions  | B+2H  | B-NH3   | B-H2O   | AA   | Y Ions  | Y+2H  | Y-NH3   | Y-H2O   | ... |
|-----|---------|-------|---------|---------|------|---------|-------|---------|---------|-----|
| 1   | 130.0   |       |         | 112.0   | S+42 | 1,472.7 | 736.9 | 1,455.7 | 1,454.7 | 14  |
| 2   | 245.1   |       |         | 227.1   | D    | 1,343.7 | 672.3 | 1,326.6 | 1,325.7 | 13  |
| 3   | 316.1   |       |         | 298.1   | A    | 1,228.6 | 614.8 | 1,211.6 | 1,210.6 | 12  |
| 4   | 387.2   |       |         | 369.1   | A    | 1,157.6 | 579.3 | 1,140.6 | 1,139.6 | 11  |
| 5   | 486.2   |       |         | 468.2   | V    | 1,086.6 | 543.8 | 1,069.5 | 1,068.6 | 10  |
| 6   | 601.2   | 301.1 |         | 583.2   | D    | 987.5   | 494.3 | 970.5   | 969.5   | 9   |
| 7   | 702.3   | 351.7 |         | 684.3   | T    | 872.5   | 436.7 | 855.4   | 854.5   | 8   |
| 8   | 789.3   | 395.2 |         | 771.3   | S    | 771.4   | 386.2 | 754.4   | 753.4   | 7   |
| 9   | 876.4   | 438.7 |         | 858.3   | S    | 684.4   | 342.7 | 667.4   | 666.4   | 6   |
| 10  | 1,005.4 | 503.2 |         | 987.4   | E    | 597.4   |       | 580.3   | 579.3   | 5   |
| 11  | 1,118.5 | 559.7 |         | 1,100.5 | I    | 468.3   |       | 451.3   | 450.3   | 4   |
| 12  | 1,219.5 | 610.3 |         | 1,201.5 | T    | 355.2   |       | 338.2   | 337.2   | 3   |
| 13  | 1,320.6 | 660.8 |         | 1,302.6 | T    | 254.2   |       | 237.2   | 236.2   | 2   |
| 14  | 1,472.7 | 736.9 | 1,455.7 | 1,454.7 | K+6  | 153.1   |       | 136.1   |         | 1   |



# Whole proteome

| Protein No. | Leading protein name   | Sequence                     | Mascot Score | Variable Modifications | SILAC State | Charge | m/z       |
|-------------|------------------------|------------------------------|--------------|------------------------|-------------|--------|-----------|
| W-20        | sp Q15041 IAR6P1_HUMAN | STNLLAAETASLEEQLQGWGEVMLMADK | 92.22        | Unmodified             | Light       | 2      | 1518.2386 |

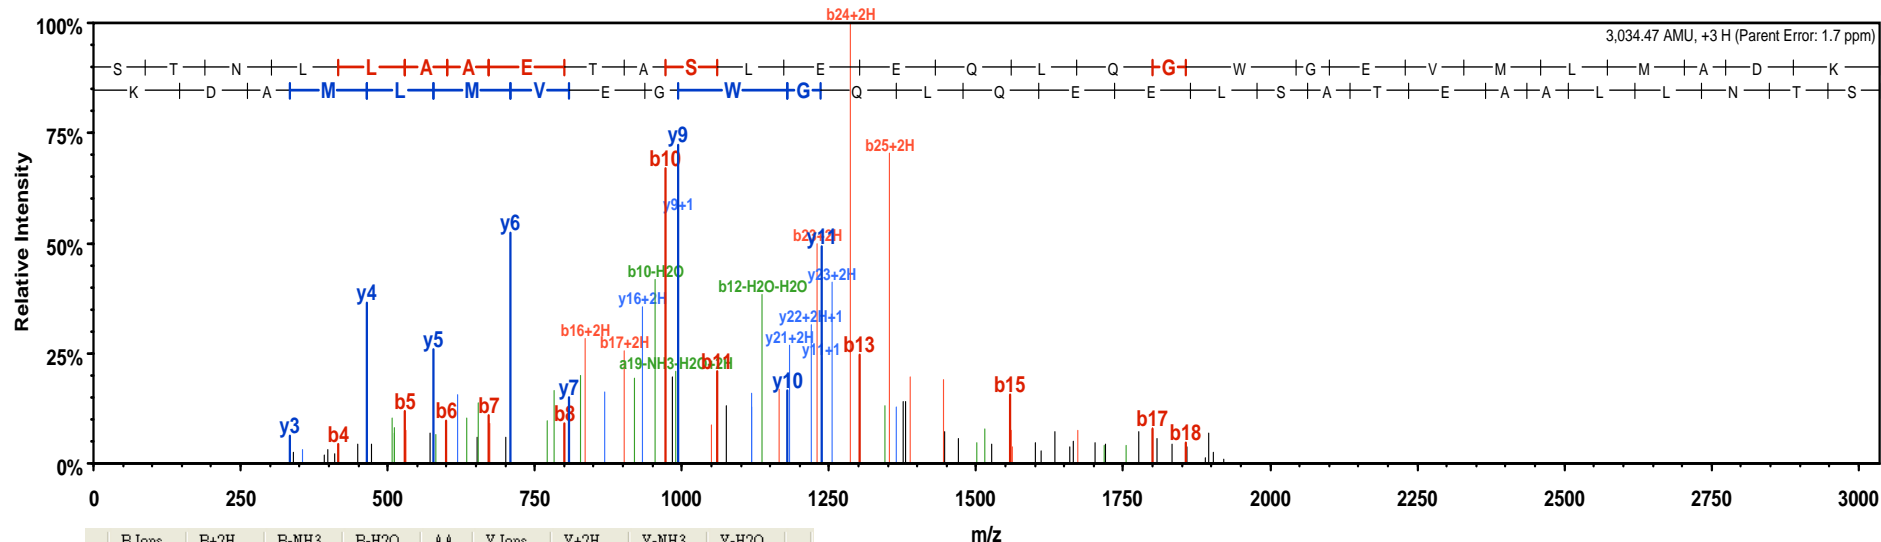

| ... | B Ions  | B+2H    | B-NH3   | B-H2O   | AA | Y Ions  | Y+2H    | Y-NH3   | Y-H2O   | ... |
|-----|---------|---------|---------|---------|----|---------|---------|---------|---------|-----|
| 1   | 88.0    |         |         | 70.0    | S  | 3,035.5 | 1,518.2 | 3,018.4 | 3,017.5 | 28  |
| 2   | 189.1   |         |         | 171.1   | T  | 2,948.4 | 1,474.7 | 2,931.4 | 2,930.4 | 27  |
| 3   | 303.1   |         | 286.1   | 285.1   | N  | 2,847.4 | 1,424.2 | 2,830.4 | 2,829.4 | 26  |
| 4   | 416.2   |         | 399.2   | 398.2   | L  | 2,733.3 | 1,367.2 | 2,716.3 | 2,715.3 | 25  |
| 5   | 529.3   |         | 512.3   | 511.3   | L  | 2,620.3 | 1,310.6 | 2,603.2 | 2,602.3 | 24  |
| 6   | 600.3   | 300.7   | 583.3   | 582.3   | A  | 2,507.2 | 1,254.1 | 2,490.2 | 2,489.2 | 23  |
| 7   | 671.4   | 336.2   | 654.3   | 653.4   | A  | 2,436.1 | 1,218.6 | 2,419.1 | 2,418.1 | 22  |
| 8   | 800.4   | 400.7   | 783.4   | 782.4   | E  | 2,365.1 | 1,183.1 | 2,348.1 | 2,347.1 | 21  |
| 9   | 901.5   | 451.2   | 884.4   | 883.5   | T  | 2,236.1 | 1,118.5 | 2,219.0 | 2,218.1 | 20  |
| 10  | 972.5   | 486.8   | 955.5   | 954.5   | A  | 2,135.0 | 1,068.0 | 2,118.0 | 2,117.0 | 19  |
| 11  | 1,059.5 | 530.3   | 1,042.5 | 1,041.5 | S  | 2,064.0 | 1,032.5 | 2,047.0 | 2,046.0 | 18  |
| 12  | 1,172.6 | 586.8   | 1,155.6 | 1,154.6 | L  | 1,976.9 | 989.0   | 1,959.9 | 1,958.9 | 17  |
| 13  | 1,301.7 | 651.3   | 1,284.6 | 1,283.6 | E  | 1,863.9 | 932.4   | 1,846.8 | 1,845.9 | 16  |
| 14  | 1,430.7 | 715.9   | 1,413.7 | 1,412.7 | E  | 1,734.8 | 867.9   | 1,717.8 | 1,716.8 | 15  |
| 15  | 1,558.8 | 779.9   | 1,541.7 | 1,540.7 | Q  | 1,605.8 | 803.4   | 1,588.8 | 1,587.8 | 14  |
| 16  | 1,671.8 | 836.4   | 1,654.8 | 1,653.8 | L  | 1,477.7 | 739.4   | 1,460.7 | 1,459.7 | 13  |
| 17  | 1,799.9 | 900.5   | 1,782.9 | 1,781.9 | Q  | 1,364.6 | 682.8   | 1,347.6 | 1,346.6 | 12  |
| 18  | 1,856.9 | 929.0   | 1,839.9 | 1,838.9 | G  | 1,236.6 | 618.8   | 1,219.5 | 1,218.6 | 11  |
| 19  | 2,043.0 | 1,022.0 | 2,026.0 | 2,025.0 | W  | 1,179.6 | 590.3   | 1,162.5 | 1,161.5 | 10  |
| 20  | 2,100.0 | 1,050.5 | 2,083.0 | 2,082.0 | G  | 993.5   | 497.2   | 976.4   | 975.5   | 9   |
| 21  | 2,229.1 | 1,115.0 | 2,212.0 | 2,211.1 | E  | 936.5   | 468.7   | 919.4   | 918.4   | 8   |
| 22  | 2,328.1 | 1,164.6 | 2,311.1 | 2,310.1 | V  | 807.4   | 404.2   | 790.4   | 789.4   | 7   |
| 23  | 2,459.2 | 1,230.1 | 2,442.1 | 2,441.2 | M  | 708.3   | 354.7   | 691.3   | 690.3   | 6   |
| 24  | 2,572.3 | 1,286.6 | 2,555.2 | 2,554.2 | L  | 577.3   |         | 560.3   | 559.3   | 5   |
| 25  | 2,703.3 | 1,352.2 | 2,686.3 | 2,685.3 | M  | 464.2   |         | 447.2   | 446.2   | 4   |
| 26  | 2,774.3 | 1,387.7 | 2,757.3 | 2,756.3 | A  | 333.2   |         | 316.2   | 315.2   | 3   |
| 27  | 2,889.4 | 1,445.2 | 2,872.3 | 2,871.4 | D  | 262.1   |         | 245.1   | 244.1   | 2   |
| 28  | 3,035.5 | 1,518.2 | 3,018.4 | 3,017.5 | K  | 147.1   |         | 130.1   |         | 1   |

# Whole proteome

| Protein No. | Leading protein name | Sequence         | Mascot Score | Variable Modifications | SILAC State | Charge | m/z       |
|-------------|----------------------|------------------|--------------|------------------------|-------------|--------|-----------|
| W-25        | splQ9NYB9IABI2_HUMAN | KPIDYTILDDIGHGVK | 92.22        | Unmodified             | Light       | 2      | 892.48308 |

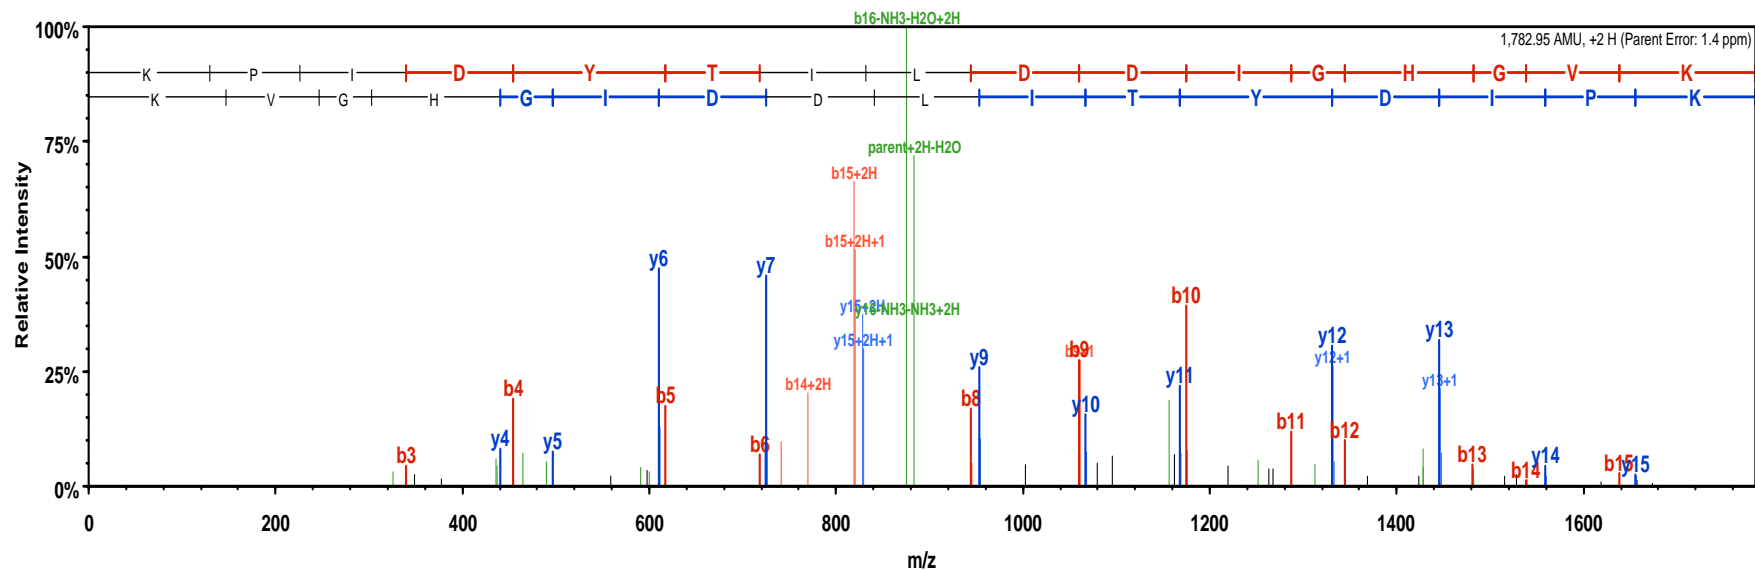

| ... | B Ions  | B+2H  | B-NH3   | B-H2O   | AA | Y Ions  | Y+2H  | Y-NH3   | Y-H2O   | ... |
|-----|---------|-------|---------|---------|----|---------|-------|---------|---------|-----|
| 1   | 129.1   | 65.1  | 112.1   |         | K  | 1,784.0 | 892.5 | 1,766.9 | 1,765.9 | 16  |
| 2   | 226.2   | 113.6 | 209.1   |         | P  | 1,655.9 | 828.4 | 1,638.8 | 1,637.9 | 15  |
| 3   | 339.2   | 170.1 | 322.2   |         | I  | 1,558.8 | 779.9 | 1,541.8 | 1,540.8 | 14  |
| 4   | 454.3   | 227.6 | 437.2   | 436.3   | D  | 1,445.7 | 723.4 | 1,428.7 | 1,427.7 | 13  |
| 5   | 617.3   | 309.2 | 600.3   | 599.3   | Y  | 1,330.7 | 665.9 | 1,313.7 | 1,312.7 | 12  |
| 6   | 718.4   | 359.7 | 701.4   | 700.4   | T  | 1,167.6 | 584.3 | 1,150.6 | 1,149.6 | 11  |
| 7   | 831.5   | 416.2 | 814.4   | 813.5   | I  | 1,066.6 | 533.8 | 1,049.6 | 1,048.6 | 10  |
| 8   | 944.5   | 472.8 | 927.5   | 926.5   | L  | 953.5   | 477.3 | 936.5   | 935.5   | 9   |
| 9   | 1,059.6 | 530.3 | 1,042.5 | 1,041.6 | D  | 840.4   | 420.7 | 823.4   | 822.4   | 8   |
| 10  | 1,174.6 | 587.8 | 1,157.6 | 1,156.6 | D  | 725.4   | 363.2 | 708.4   | 707.4   | 7   |
| 11  | 1,287.7 | 644.3 | 1,270.7 | 1,269.7 | I  | 610.4   | 305.7 | 593.3   |         | 6   |
| 12  | 1,344.7 | 672.9 | 1,327.7 | 1,326.7 | G  | 497.3   | 249.1 | 480.3   |         | 5   |
| 13  | 1,481.8 | 741.4 | 1,464.7 | 1,463.8 | H  | 440.3   | 220.6 | 423.2   |         | 4   |
| 14  | 1,538.8 | 769.9 | 1,521.8 | 1,520.8 | G  | 303.2   |       | 286.2   |         | 3   |
| 15  | 1,637.9 | 819.4 | 1,620.8 | 1,619.8 | Y  | 246.2   |       | 229.2   |         | 2   |
| 16  | 1,784.0 | 892.5 | 1,766.9 | 1,765.9 | K  | 147.1   |       | 130.1   |         | 1   |

# Whole proteome

| Protein No. | Leading protein name  | Sequence                  | Mascot Score | Variable Modifications | SILAC State | Charge | m/z       |
|-------------|-----------------------|---------------------------|--------------|------------------------|-------------|--------|-----------|
| W-21        | splQ9UEW8ISTK39_HUMAN | DAYELQEVIQSGATAVVQAALCKPR | 91.87        | Unmodified             | Light       | 2      | 1323.6814 |

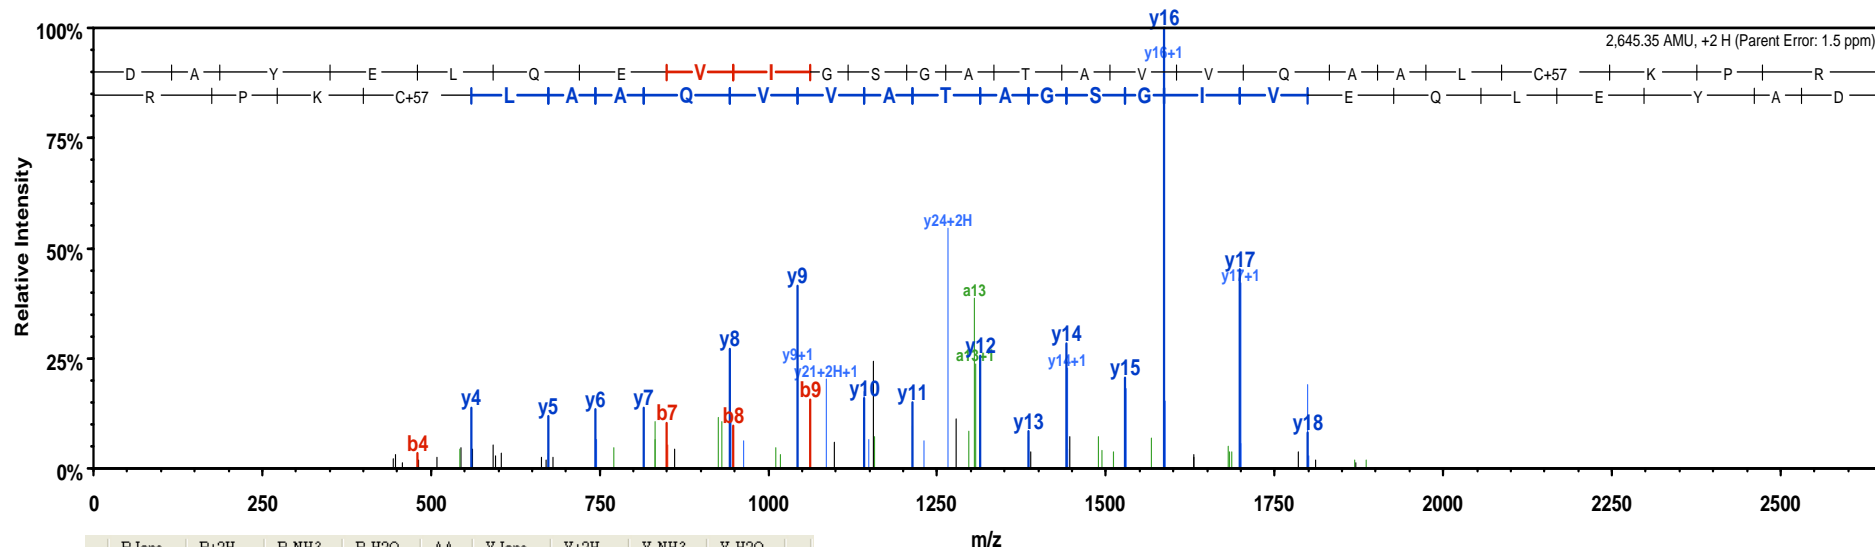

| ... | E Ions  | B+2H    | B-NH3   | B-H2O   | AA   | Y Ions  | Y+2H    | Y-NH3   | Y-H2O   | ... |
|-----|---------|---------|---------|---------|------|---------|---------|---------|---------|-----|
| 1   | 116.0   |         |         | 98.0    | D    | 2,646.4 | 1,323.7 | 2,629.3 | 2,628.3 | 25  |
| 2   | 187.1   |         |         | 169.1   | A    | 2,531.3 | 1,266.2 | 2,514.3 | 2,513.3 | 24  |
| 3   | 350.1   |         |         | 332.1   | Y    | 2,460.3 | 1,230.6 | 2,443.3 | 2,442.3 | 23  |
| 4   | 479.2   |         |         | 461.2   | E    | 2,297.2 | 1,149.1 | 2,280.2 | 2,279.2 | 22  |
| 5   | 592.3   |         |         | 574.3   | L    | 2,168.2 | 1,084.6 | 2,151.2 | 2,150.2 | 21  |
| 6   | 720.3   | 360.7   | 703.3   | 702.3   | Q    | 2,055.1 | 1,028.1 | 2,038.1 | 2,037.1 | 20  |
| 7   | 849.4   | 425.2   | 832.3   | 831.4   | E    | 1,927.0 | 964.0   | 1,910.0 | 1,909.0 | 19  |
| 8   | 948.4   | 474.7   | 931.4   | 930.4   | V    | 1,798.0 | 899.5   | 1,781.0 | 1,780.0 | 18  |
| 9   | 1,061.5 | 531.3   | 1,044.5 | 1,043.5 | I    | 1,698.9 | 850.0   | 1,681.9 | 1,680.9 | 17  |
| 10  | 1,118.5 | 559.8   | 1,101.5 | 1,100.5 | G    | 1,585.8 | 793.4   | 1,568.8 | 1,567.8 | 16  |
| 11  | 1,205.6 | 603.3   | 1,188.5 | 1,187.6 | S    | 1,528.8 | 764.9   | 1,511.8 | 1,510.8 | 15  |
| 12  | 1,262.6 | 631.8   | 1,245.6 | 1,244.6 | G    | 1,441.8 | 721.4   | 1,424.8 | 1,423.8 | 14  |
| 13  | 1,333.6 | 667.3   | 1,316.6 | 1,315.6 | A    | 1,384.8 | 692.9   | 1,367.7 | 1,366.8 | 13  |
| 14  | 1,434.7 | 717.8   | 1,417.6 | 1,416.7 | T    | 1,313.7 | 657.4   | 1,296.7 | 1,295.7 | 12  |
| 15  | 1,505.7 | 753.4   | 1,488.7 | 1,487.7 | A    | 1,212.7 | 606.8   | 1,195.7 |         | 11  |
| 16  | 1,604.8 | 802.9   | 1,587.8 | 1,586.8 | V    | 1,141.7 | 571.3   | 1,124.6 |         | 10  |
| 17  | 1,703.8 | 852.4   | 1,686.8 | 1,685.8 | V    | 1,042.6 | 521.8   | 1,025.6 |         | 9   |
| 18  | 1,831.9 | 916.5   | 1,814.9 | 1,813.9 | Q    | 943.5   | 472.3   | 926.5   |         | 8   |
| 19  | 1,902.9 | 952.0   | 1,885.9 | 1,884.9 | A    | 815.5   | 408.2   | 798.4   |         | 7   |
| 20  | 1,974.0 | 987.5   | 1,957.0 | 1,956.0 | A    | 744.4   | 372.7   | 727.4   |         | 6   |
| 21  | 2,087.1 | 1,044.0 | 2,070.0 | 2,069.1 | L    | 673.4   | 337.2   | 656.4   |         | 5   |
| 22  | 2,247.1 | 1,124.1 | 2,230.1 | 2,229.1 | C+57 | 560.3   | 280.7   | 543.3   |         | 4   |
| 23  | 2,375.2 | 1,188.1 | 2,358.2 | 2,357.2 | K    | 400.3   | 200.6   | 383.2   |         | 3   |
| 24  | 2,472.2 | 1,236.6 | 2,455.2 | 2,454.2 | P    | 272.2   |         | 255.1   |         | 2   |
| 25  | 2,646.4 | 1,323.7 | 2,629.3 | 2,628.3 | R    | 175.1   |         | 158.1   |         | 1   |

# Whole proteome

| Protein No. | Leading protein name | Sequence               | Mascot Score | Variable Modifications | SILAC State | Charge | m/z       |
|-------------|----------------------|------------------------|--------------|------------------------|-------------|--------|-----------|
| W-22        | sp Q9H2C0 IGAN_HUMAN | LNEDTIQDVVQAADLLLLTDLK | 91.34        | Unmodified             | Light       | 3      | 814.11089 |

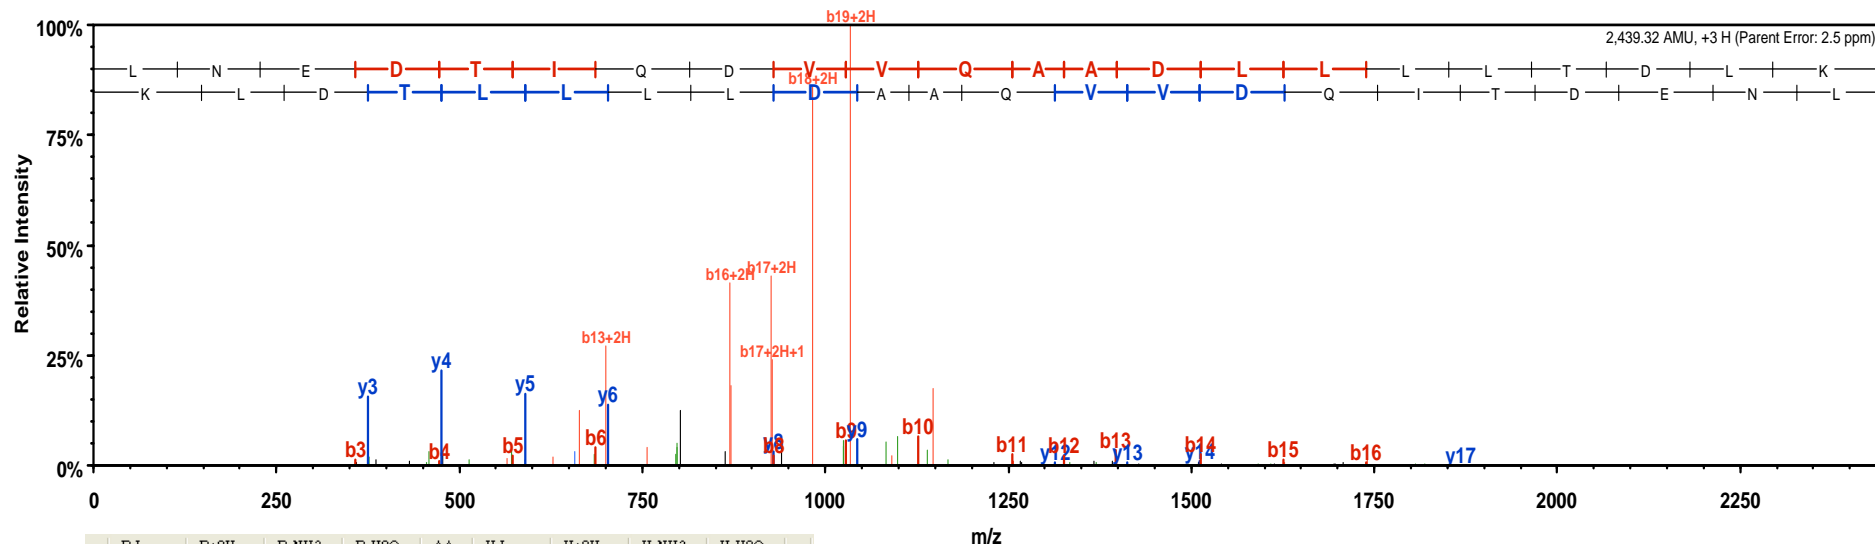

| ... | B Ions  | B+2H    | B-NH3   | B-H2O   | AA | Y Ions  | Y+2H    | Y-NH3   | Y-H2O   | ... |
|-----|---------|---------|---------|---------|----|---------|---------|---------|---------|-----|
| 1   | 114.1   |         |         |         | L  | 2,440.3 | 1,220.7 | 2,423.3 | 2,422.3 | 22  |
| 2   | 228.1   |         | 211.1   |         | N  | 2,327.2 | 1,164.1 | 2,310.2 | 2,309.2 | 21  |
| 3   | 357.2   |         | 340.2   | 339.2   | E  | 2,213.2 | 1,107.1 | 2,196.2 | 2,195.2 | 20  |
| 4   | 472.2   |         | 455.2   | 454.2   | D  | 2,084.1 | 1,042.6 | 2,067.1 | 2,066.1 | 19  |
| 5   | 573.3   |         | 556.2   | 555.2   | T  | 1,969.1 | 985.1   | 1,952.1 | 1,951.1 | 18  |
| 6   | 686.3   | 343.7   | 669.3   | 668.3   | I  | 1,868.1 | 934.5   | 1,851.0 | 1,850.1 | 17  |
| 7   | 814.4   | 407.7   | 797.4   | 796.4   | Q  | 1,755.0 | 878.0   | 1,738.0 | 1,737.0 | 16  |
| 8   | 929.4   | 465.2   | 912.4   | 911.4   | D  | 1,626.9 | 814.0   | 1,609.9 | 1,608.9 | 15  |
| 9   | 1,028.5 | 514.7   | 1,011.5 | 1,010.5 | V  | 1,511.9 | 756.5   | 1,494.9 | 1,493.9 | 14  |
| 10  | 1,127.6 | 564.3   | 1,110.5 | 1,109.5 | V  | 1,412.8 | 706.9   | 1,395.8 | 1,394.8 | 13  |
| 11  | 1,255.6 | 628.3   | 1,238.6 | 1,237.6 | Q  | 1,313.8 | 657.4   | 1,296.7 | 1,295.8 | 12  |
| 12  | 1,326.7 | 663.8   | 1,309.6 | 1,308.6 | A  | 1,185.7 | 593.4   | 1,168.7 | 1,167.7 | 11  |
| 13  | 1,397.7 | 699.3   | 1,380.7 | 1,379.7 | A  | 1,114.7 | 557.8   | 1,097.6 | 1,096.7 | 10  |
| 14  | 1,512.7 | 756.9   | 1,495.7 | 1,494.7 | D  | 1,043.6 | 522.3   | 1,026.6 | 1,025.6 | 9   |
| 15  | 1,625.8 | 813.4   | 1,608.8 | 1,607.8 | L  | 928.6   | 464.8   | 911.6   | 910.6   | 8   |
| 16  | 1,738.9 | 869.9   | 1,721.9 | 1,720.9 | L  | 815.5   | 408.3   | 798.5   | 797.5   | 7   |
| 17  | 1,852.0 | 926.5   | 1,834.9 | 1,834.0 | L  | 702.4   | 351.7   | 685.4   | 684.4   | 6   |
| 18  | 1,965.1 | 983.0   | 1,948.0 | 1,947.0 | L  | 589.4   |         | 572.3   | 571.3   | 5   |
| 19  | 2,066.1 | 1,033.6 | 2,049.1 | 2,048.1 | T  | 476.3   |         | 459.2   | 458.3   | 4   |
| 20  | 2,181.1 | 1,091.1 | 2,164.1 | 2,163.1 | D  | 375.2   |         | 358.2   | 357.2   | 3   |
| 21  | 2,294.2 | 1,147.6 | 2,277.2 | 2,276.2 | L  | 260.2   |         | 243.2   |         | 2   |
| 22  | 2,440.3 | 1,220.7 | 2,423.3 | 2,422.3 | K  | 147.1   |         | 130.1   |         | 1   |

# Whole proteome

| Protein No. | Leading protein name   | Sequence        | Mascot Score | Variable Modifications | SILAC State | Charge | m/z       |
|-------------|------------------------|-----------------|--------------|------------------------|-------------|--------|-----------|
| W-23        | sp Q9BZK3 INACP1_HUMAN | IEDLSQEAQLAAAEK | 91.02        | Unmodified             | Heavy       | 2      | 808.41232 |

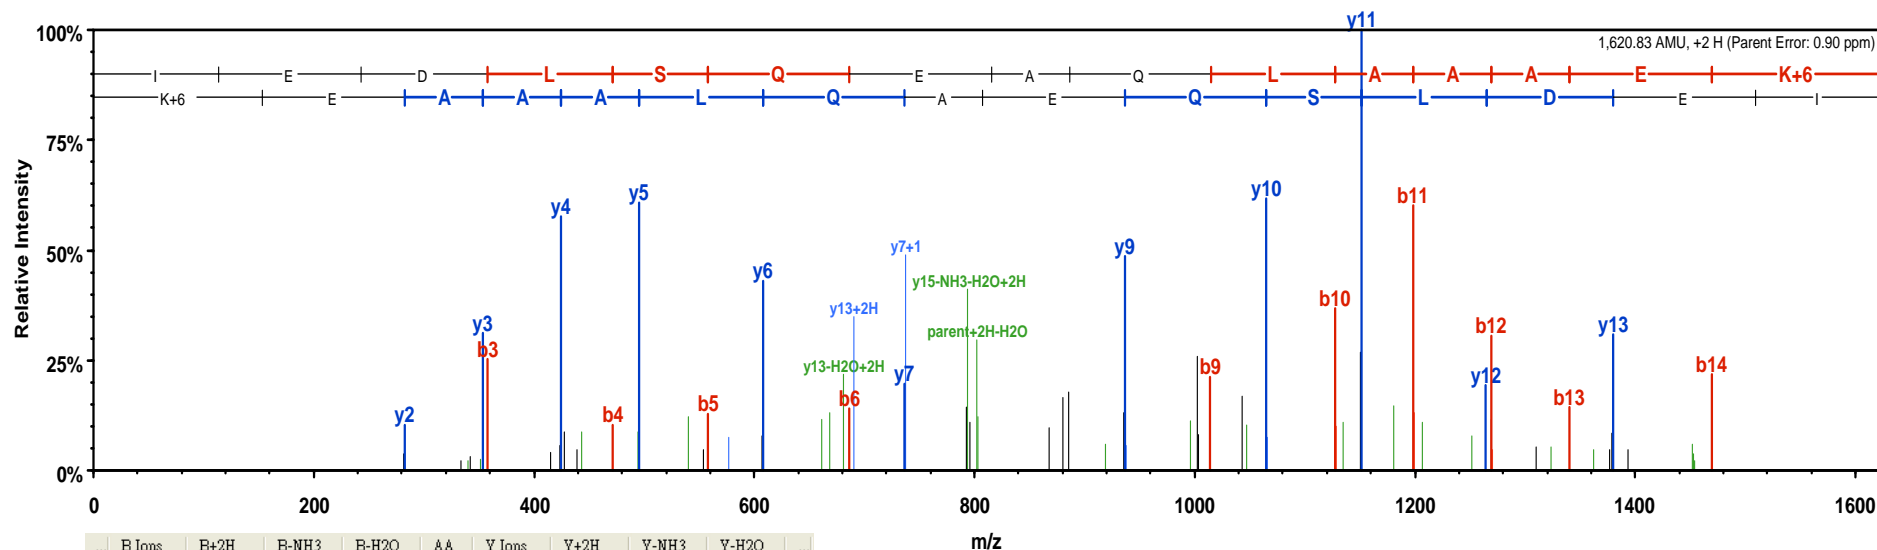

| ... | B Ions  | B+2H  | B-NH3   | B-H2O   | AA  | Y Ions  | Y+2H  | Y-NH3   | Y-H2O   | ... |
|-----|---------|-------|---------|---------|-----|---------|-------|---------|---------|-----|
| 1   | 114.1   |       |         |         | I   | 1,621.8 | 811.4 | 1,604.8 | 1,603.8 | 15  |
| 2   | 243.1   |       |         | 225.1   | E   | 1,508.8 | 754.9 | 1,491.7 | 1,490.7 | 14  |
| 3   | 358.2   |       |         | 340.2   | D   | 1,379.7 | 690.4 | 1,362.7 | 1,361.7 | 13  |
| 4   | 471.2   |       |         | 453.2   | L   | 1,264.7 | 632.8 | 1,247.7 | 1,246.7 | 12  |
| 5   | 558.3   |       |         | 540.3   | S   | 1,151.6 | 576.3 | 1,134.6 | 1,133.6 | 11  |
| 6   | 686.3   | 343.7 | 669.3   | 668.3   | Q   | 1,064.6 | 532.8 | 1,047.5 | 1,046.6 | 10  |
| 7   | 815.4   | 408.2 | 798.4   | 797.4   | E   | 936.5   | 468.8 | 919.5   | 918.5   | 9   |
| 8   | 886.4   | 443.7 | 869.4   | 868.4   | A   | 807.5   | 404.2 | 790.4   | 789.5   | 8   |
| 9   | 1,014.5 | 507.7 | 997.4   | 996.5   | Q   | 736.4   | 368.7 | 719.4   | 718.4   | 7   |
| 10  | 1,127.6 | 564.3 | 1,110.5 | 1,109.5 | L   | 608.4   | 304.7 | 591.3   | 590.4   | 6   |
| 11  | 1,198.6 | 599.8 | 1,181.6 | 1,180.6 | A   | 495.3   |       | 478.3   | 477.3   | 5   |
| 12  | 1,269.6 | 635.3 | 1,252.6 | 1,251.6 | A   | 424.2   |       | 407.2   | 406.2   | 4   |
| 13  | 1,340.7 | 670.8 | 1,323.6 | 1,322.7 | A   | 353.2   |       | 336.2   | 335.2   | 3   |
| 14  | 1,469.7 | 735.4 | 1,452.7 | 1,451.7 | E   | 282.2   |       | 265.1   | 264.2   | 2   |
| 15  | 1,621.8 | 811.4 | 1,604.8 | 1,603.8 | K+6 | 153.1   |       | 136.1   |         | 1   |

# Whole proteome

| Protein No. | Leading protein name | Sequence              | Mascot Score | Variable Modifications | SILAC State | Charge | m/z       |
|-------------|----------------------|-----------------------|--------------|------------------------|-------------|--------|-----------|
| W-24        | splQ9H008ILHPP_HUMAN | ADGYVDNLAEAVDLLLQHADK | 90.14        | Unmodified             | Light       | 2      | 1135.5686 |

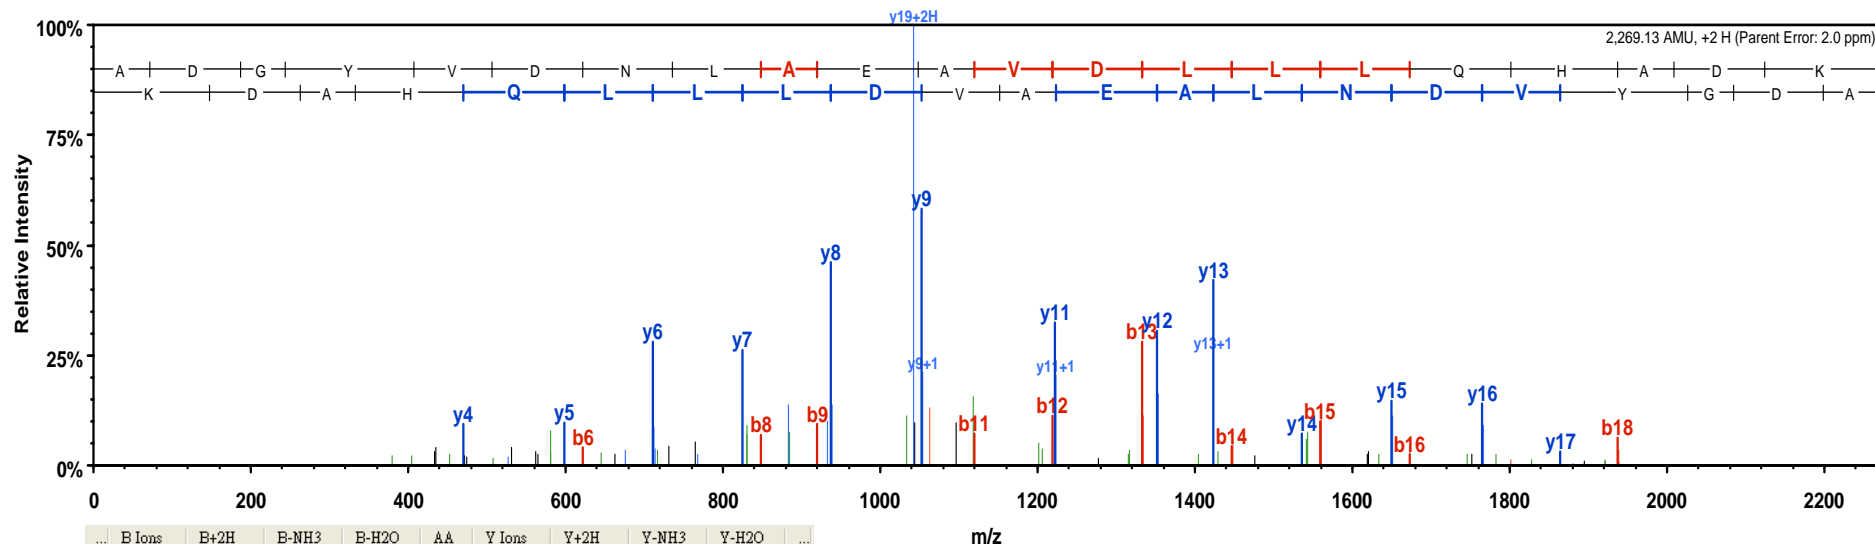

| ... | B Ions  | B+2H    | B-NH3   | B-H2O   | AA | Y Ions  | Y+2H    | Y-NH3   | Y-H2O   | ... |
|-----|---------|---------|---------|---------|----|---------|---------|---------|---------|-----|
| 1   | 72.0    |         |         |         | A  | 2,270.1 | 1,135.6 | 2,253.1 | 2,252.1 | 21  |
| 2   | 187.1   |         |         | 169.1   | D  | 2,199.1 | 1,100.1 | 2,182.1 | 2,181.1 | 20  |
| 3   | 244.1   |         |         | 226.1   | G  | 2,084.1 | 1,042.5 | 2,067.0 | 2,066.1 | 19  |
| 4   | 407.2   |         |         | 389.1   | V  | 2,027.0 | 1,014.0 | 2,010.0 | 2,009.0 | 18  |
| 5   | 506.2   |         |         | 488.2   | V  | 1,864.0 | 932.5   | 1,847.0 | 1,846.0 | 17  |
| 6   | 621.3   | 311.1   |         | 603.2   | D  | 1,764.9 | 883.0   | 1,747.9 | 1,746.9 | 16  |
| 7   | 735.3   | 368.2   | 718.3   | 717.3   | N  | 1,649.9 | 825.4   | 1,632.9 | 1,631.9 | 15  |
| 8   | 848.4   | 424.7   | 831.4   | 830.4   | L  | 1,535.8 | 768.4   | 1,518.8 | 1,517.8 | 14  |
| 9   | 919.4   | 460.2   | 902.4   | 901.4   | A  | 1,422.8 | 711.9   | 1,405.7 | 1,404.7 | 13  |
| 10  | 1,048.5 | 524.7   | 1,031.4 | 1,030.4 | E  | 1,351.7 | 676.4   | 1,334.7 | 1,333.7 | 12  |
| 11  | 1,119.5 | 560.3   | 1,102.5 | 1,101.5 | A  | 1,222.7 | 611.8   | 1,205.7 | 1,204.7 | 11  |
| 12  | 1,218.6 | 609.8   | 1,201.5 | 1,200.6 | V  | 1,151.6 | 576.3   | 1,134.6 | 1,133.6 | 10  |
| 13  | 1,333.6 | 667.3   | 1,316.6 | 1,315.6 | D  | 1,052.6 | 526.8   | 1,035.5 | 1,034.6 | 9   |
| 14  | 1,446.7 | 723.8   | 1,429.6 | 1,428.7 | L  | 937.5   | 469.3   | 920.5   | 919.5   | 8   |
| 15  | 1,559.8 | 780.4   | 1,542.7 | 1,541.7 | L  | 824.5   | 412.7   | 807.4   | 806.5   | 7   |
| 16  | 1,672.8 | 836.9   | 1,655.8 | 1,654.8 | L  | 711.4   | 356.2   | 694.4   | 693.4   | 6   |
| 17  | 1,800.9 | 901.0   | 1,783.9 | 1,782.9 | Q  | 598.3   | 299.7   | 581.3   | 580.3   | 5   |
| 18  | 1,938.0 | 969.5   | 1,920.9 | 1,919.9 | H  | 470.2   | 235.6   | 453.2   | 452.2   | 4   |
| 19  | 2,009.0 | 1,005.0 | 1,992.0 | 1,991.0 | A  | 333.2   |         | 316.2   | 315.2   | 3   |
| 20  | 2,124.0 | 1,062.5 | 2,107.0 | 2,106.0 | D  | 262.1   |         | 245.1   | 244.1   | 2   |
| 21  | 2,270.1 | 1,135.6 | 2,253.1 | 2,252.1 | K  | 147.1   |         | 130.1   |         | 1   |

# Whole proteome

| Protein No. | Leading protein name  | Sequence               | Mascot Score | Variable Modifications | SILAC State | Charge | m/z      |
|-------------|-----------------------|------------------------|--------------|------------------------|-------------|--------|----------|
| W-25        | spIP42574ICASP3_HUMAN | GTELDCGIETDSGVDDDMACHK | 89.27        | Unmodified             | Light       | 2      | 1212.983 |

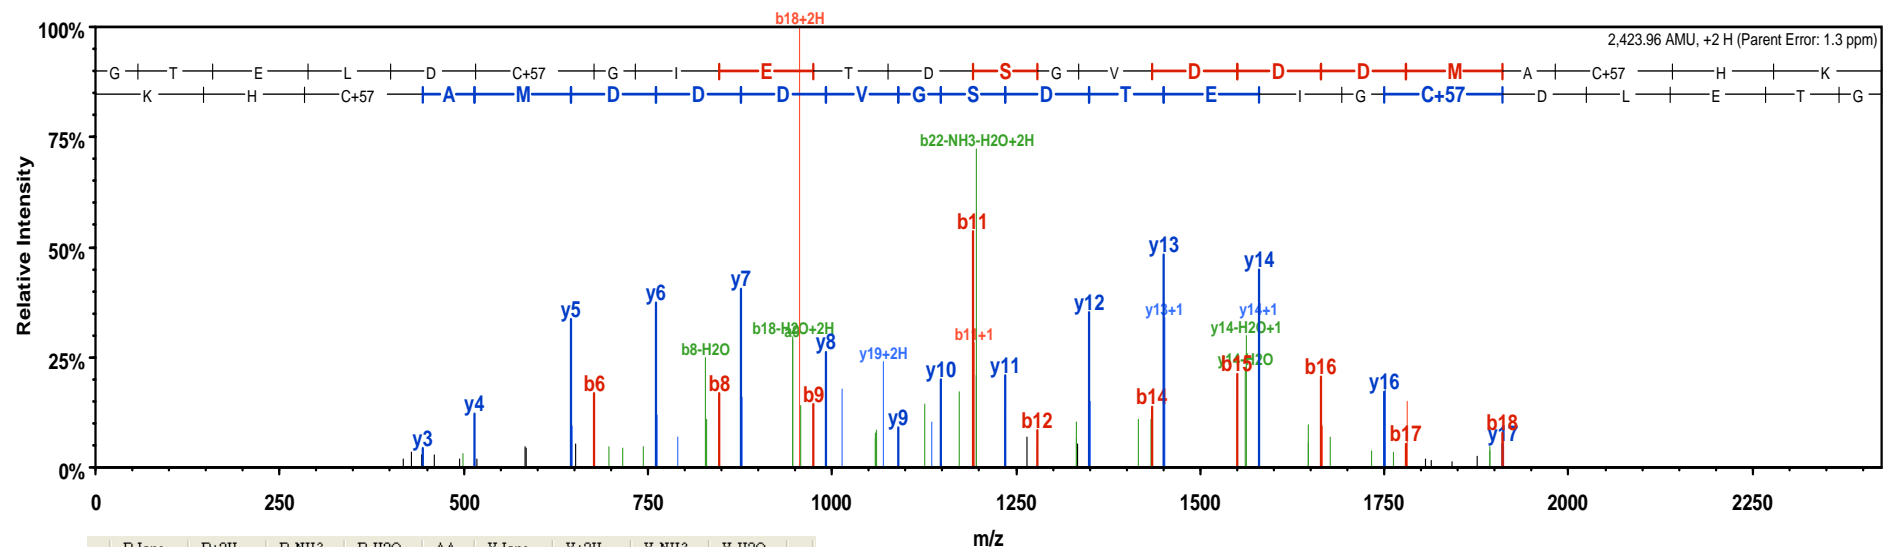

| ... | B Ions  | B+2H    | B-NH3   | B-H2O   | AA   | Y Ions  | Y+2H    | Y-NH3   | Y-H2O   | ... |
|-----|---------|---------|---------|---------|------|---------|---------|---------|---------|-----|
| 1   | 58.0    |         |         |         | G    | 2,425.0 | 1,213.0 | 2,407.9 | 2,406.9 | 22  |
| 2   | 159.1   |         |         | 141.1   | T    | 2,367.9 | 1,184.5 | 2,350.9 | 2,349.9 | 21  |
| 3   | 288.1   |         |         | 270.1   | E    | 2,266.9 | 1,133.9 | 2,249.9 | 2,248.9 | 20  |
| 4   | 401.2   |         |         | 383.2   | L    | 2,137.8 | 1,069.4 | 2,120.8 | 2,119.8 | 19  |
| 5   | 516.2   |         |         | 498.2   | D    | 2,024.8 | 1,012.9 | 2,007.7 | 2,006.8 | 18  |
| 6   | 676.3   | 338.6   |         | 658.3   | C+57 | 1,909.7 | 955.4   | 1,892.7 | 1,891.7 | 17  |
| 7   | 733.3   | 367.1   |         | 715.3   | G    | 1,749.7 | 875.4   | 1,732.7 | 1,731.7 | 16  |
| 8   | 846.4   | 423.7   |         | 828.4   | I    | 1,692.7 | 846.8   | 1,675.7 | 1,674.7 | 15  |
| 9   | 975.4   | 488.2   |         | 957.4   | E    | 1,579.6 | 790.3   | 1,562.6 | 1,561.6 | 14  |
| 10  | 1,076.5 | 538.7   |         | 1,058.4 | T    | 1,450.6 | 725.8   | 1,433.5 | 1,432.5 | 13  |
| 11  | 1,191.5 | 596.2   |         | 1,173.5 | D    | 1,349.5 | 675.3   | 1,332.5 | 1,331.5 | 12  |
| 12  | 1,278.5 | 639.8   |         | 1,260.5 | S    | 1,234.5 | 617.7   | 1,217.5 | 1,216.5 | 11  |
| 13  | 1,335.5 | 668.3   |         | 1,317.5 | G    | 1,147.5 | 574.2   | 1,130.4 | 1,129.4 | 10  |
| 14  | 1,434.6 | 717.8   |         | 1,416.6 | V    | 1,090.4 | 545.7   | 1,073.4 | 1,072.4 | 9   |
| 15  | 1,549.6 | 775.3   |         | 1,531.6 | D    | 991.4   | 496.2   | 974.3   | 973.4   | 8   |
| 16  | 1,664.7 | 832.8   |         | 1,646.6 | D    | 876.3   | 438.7   | 859.3   | 858.3   | 7   |
| 17  | 1,779.7 | 890.3   |         | 1,761.7 | D    | 761.3   | 381.2   | 744.3   | 743.3   | 6   |
| 18  | 1,910.7 | 955.9   |         | 1,892.7 | M    | 646.3   | 323.6   | 629.3   |         | 5   |
| 19  | 1,981.8 | 991.4   |         | 1,963.8 | A    | 515.2   | 258.1   | 498.2   |         | 4   |
| 20  | 2,141.8 | 1,071.4 |         | 2,123.8 | C+57 | 444.2   | 222.6   | 427.2   |         | 3   |
| 21  | 2,278.9 | 1,139.9 |         | 2,260.8 | H    | 284.2   | 142.6   | 267.1   |         | 2   |
| 22  | 2,425.0 | 1,213.0 | 2,407.9 | 2,406.9 | K    | 147.1   |         | 130.1   |         | 1   |

# Whole proteome

| Protein No. | Leading protein name | Sequence             | Mascot Score | Variable Modifications  | SILAC State | Charge | m/z      |
|-------------|----------------------|----------------------|--------------|-------------------------|-------------|--------|----------|
| W-26        | sp P02795 MT2_HUMAN  | MDPNCSCAAGDSCTCAGSCK | 89.1         | Acetyl (Protein N-term) | Light       | 2      | 1125.886 |

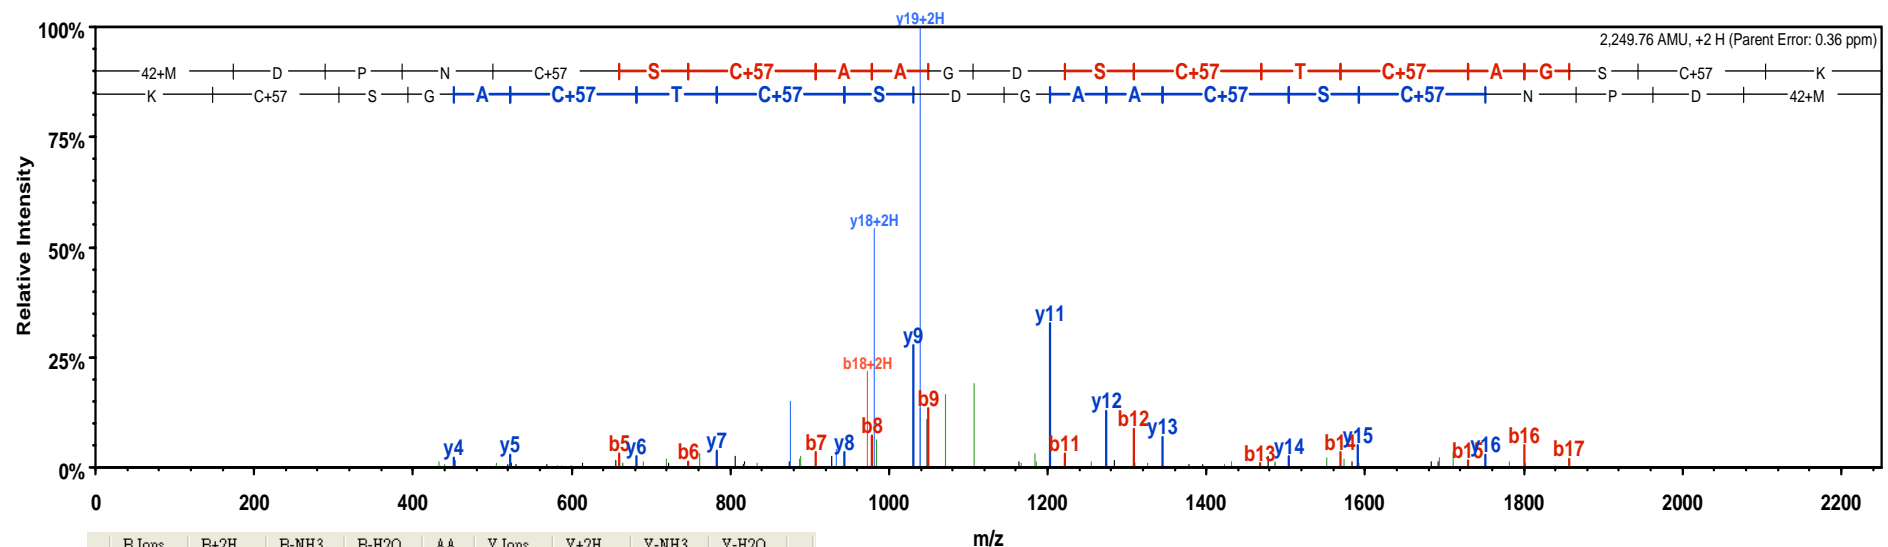

| ... | B Ions  | B+2H    | B-NH3   | B-H2O   | AA   | Y Ions  | Y+2H    | Y-NH3   | Y-H2O   | ... |
|-----|---------|---------|---------|---------|------|---------|---------|---------|---------|-----|
| 1   | 174.1   |         |         |         | M+42 | 2,250.8 | 1,125.9 | 2,233.7 | 2,232.8 | 20  |
| 2   | 289.1   |         |         | 271.1   | D    | 2,077.7 | 1,039.4 | 2,060.7 | 2,059.7 | 19  |
| 3   | 386.1   |         |         | 368.1   | P    | 1,962.7 | 981.8   | 1,945.7 | 1,944.7 | 18  |
| 4   | 500.2   |         |         | 482.2   | N    | 1,865.6 | 933.3   | 1,848.6 | 1,847.6 | 17  |
| 5   | 600.2   |         | 483.2   | 642.2   | C+57 | 1,751.6 | 876.3   | 1,734.6 | 1,733.6 | 16  |
| 6   | 747.2   | 374.1   | 730.2   | 729.2   | S    | 1,591.6 | 796.3   | 1,574.5 | 1,573.5 | 15  |
| 7   | 907.3   | 454.1   | 890.2   | 889.3   | C+57 | 1,504.5 | 752.8   | 1,487.5 | 1,486.5 | 14  |
| 8   | 978.3   | 489.7   | 961.3   | 960.3   | A    | 1,344.5 | 672.8   | 1,327.5 | 1,326.5 | 13  |
| 9   | 1,049.3 | 525.2   | 1,032.3 | 1,031.3 | A    | 1,273.5 | 637.2   | 1,256.4 | 1,255.4 | 12  |
| 10  | 1,106.4 | 553.7   | 1,089.3 | 1,088.4 | G    | 1,202.4 | 601.7   | 1,185.4 | 1,184.4 | 11  |
| 11  | 1,221.4 | 611.2   | 1,204.4 | 1,203.4 | D    | 1,145.4 | 573.2   | 1,128.4 | 1,127.4 | 10  |
| 12  | 1,308.4 | 654.7   | 1,291.4 | 1,290.4 | S    | 1,030.4 | 515.7   | 1,013.3 | 1,012.4 | 9   |
| 13  | 1,468.5 | 734.7   | 1,451.4 | 1,450.4 | C+57 | 943.3   | 472.2   | 926.3   | 925.3   | 8   |
| 14  | 1,569.5 | 785.3   | 1,552.5 | 1,551.5 | T    | 783.3   | 392.2   | 766.3   | 765.3   | 7   |
| 15  | 1,729.5 | 865.3   | 1,712.5 | 1,711.5 | C+57 | 682.3   | 341.6   | 665.2   | 664.3   | 6   |
| 16  | 1,800.6 | 900.8   | 1,783.5 | 1,782.6 | A    | 522.2   |         | 505.2   | 504.2   | 5   |
| 17  | 1,857.6 | 929.3   | 1,840.6 | 1,839.6 | G    | 451.2   |         | 434.2   | 433.2   | 4   |
| 18  | 1,944.6 | 972.8   | 1,927.6 | 1,926.6 | S    | 394.2   |         | 377.1   | 376.2   | 3   |
| 19  | 2,104.7 | 1,052.8 | 2,087.6 | 2,086.6 | C+57 | 307.1   |         | 290.1   |         | 2   |
| 20  | 2,250.8 | 1,125.9 | 2,233.7 | 2,232.8 | K    | 147.1   |         | 130.1   |         | 1   |



# Whole proteome

| Protein No. | Leading protein name | Sequence        | Mascot Score | Variable Modifications | SILAC State | Charge | m/z       |
|-------------|----------------------|-----------------|--------------|------------------------|-------------|--------|-----------|
| W-27        | splQ7Z7F7IRM55_HUMAN | KEYEQELSDDLHVER | 86.16        | Unmodified             | Light       | 2      | 945.44742 |

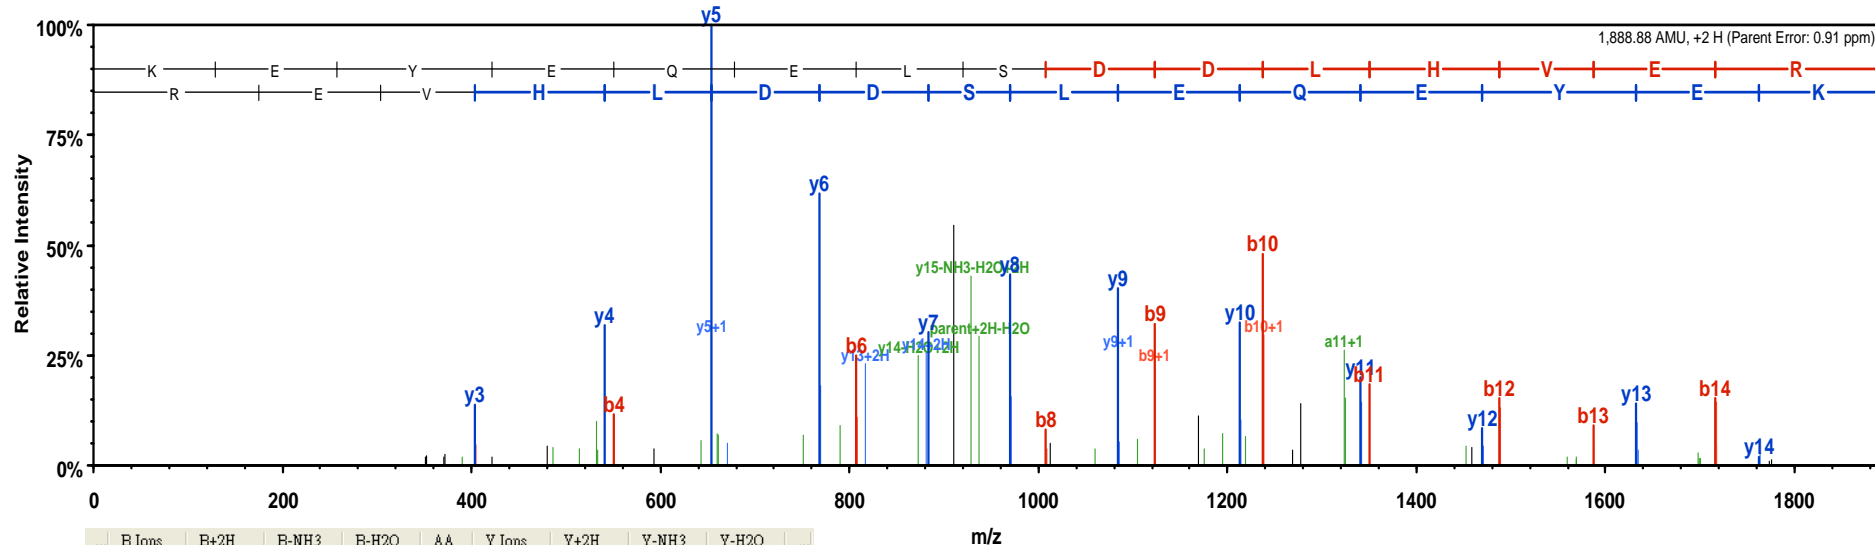

| ... | B Ions  | B+2H  | B-NH3   | B-H2O   | AA | Y Ions  | Y+2H  | Y-NH3   | Y-H2O   | ... |
|-----|---------|-------|---------|---------|----|---------|-------|---------|---------|-----|
| 1   | 129.1   | 65.1  | 112.1   |         | K  | 1,889.9 | 945.4 | 1,872.9 | 1,871.9 | 15  |
| 2   | 258.1   | 129.6 | 241.1   | 240.1   | E  | 1,761.8 | 881.4 | 1,744.8 | 1,743.8 | 14  |
| 3   | 421.2   | 211.1 | 404.2   | 403.2   | Y  | 1,632.8 | 816.9 | 1,615.7 | 1,614.7 | 13  |
| 4   | 550.3   | 275.6 | 533.2   | 532.2   | E  | 1,469.7 | 735.3 | 1,452.7 | 1,451.7 | 12  |
| 5   | 678.3   | 339.7 | 661.3   | 660.3   | Q  | 1,340.6 | 670.8 | 1,323.6 | 1,322.6 | 11  |
| 6   | 807.4   | 404.2 | 790.3   | 789.3   | E  | 1,212.6 | 606.8 | 1,195.6 | 1,194.6 | 10  |
| 7   | 920.4   | 460.7 | 903.4   | 902.4   | L  | 1,083.5 | 542.3 | 1,066.5 | 1,065.5 | 9   |
| 8   | 1,007.5 | 504.2 | 990.4   | 989.5   | S  | 970.5   | 485.7 | 953.4   | 952.4   | 8   |
| 9   | 1,122.5 | 561.8 | 1,105.5 | 1,104.5 | D  | 883.4   | 442.2 | 866.4   | 865.4   | 7   |
| 10  | 1,237.5 | 619.3 | 1,220.5 | 1,219.5 | D  | 768.4   | 384.7 | 751.4   | 750.4   | 6   |
| 11  | 1,350.6 | 675.8 | 1,333.6 | 1,332.6 | L  | 653.4   | 327.2 | 636.3   | 635.4   | 5   |
| 12  | 1,487.7 | 744.3 | 1,470.6 | 1,469.7 | H  | 540.3   | 270.6 | 523.3   | 522.3   | 4   |
| 13  | 1,586.7 | 793.9 | 1,569.7 | 1,568.7 | Y  | 403.2   |       | 386.2   | 385.2   | 3   |
| 14  | 1,715.8 | 858.4 | 1,698.7 | 1,697.8 | E  | 304.2   |       | 287.1   | 286.2   | 2   |
| 15  | 1,889.9 | 945.4 | 1,872.9 | 1,871.9 | R  | 175.1   |       | 158.1   |         | 1   |

# Whole proteome

| Protein No. | Leading protein name  | Sequence                    | Mascot Score | Variable Modifications | SILAC State | Charge | m/z       |
|-------------|-----------------------|-----------------------------|--------------|------------------------|-------------|--------|-----------|
| W-28        | splQ9NQ89ICL004_HUMAN | EALTQFIEEESLSDYDRDAEASLAAVK | 85.83        | Unmodified             | Light       | 3      | 1000.8155 |

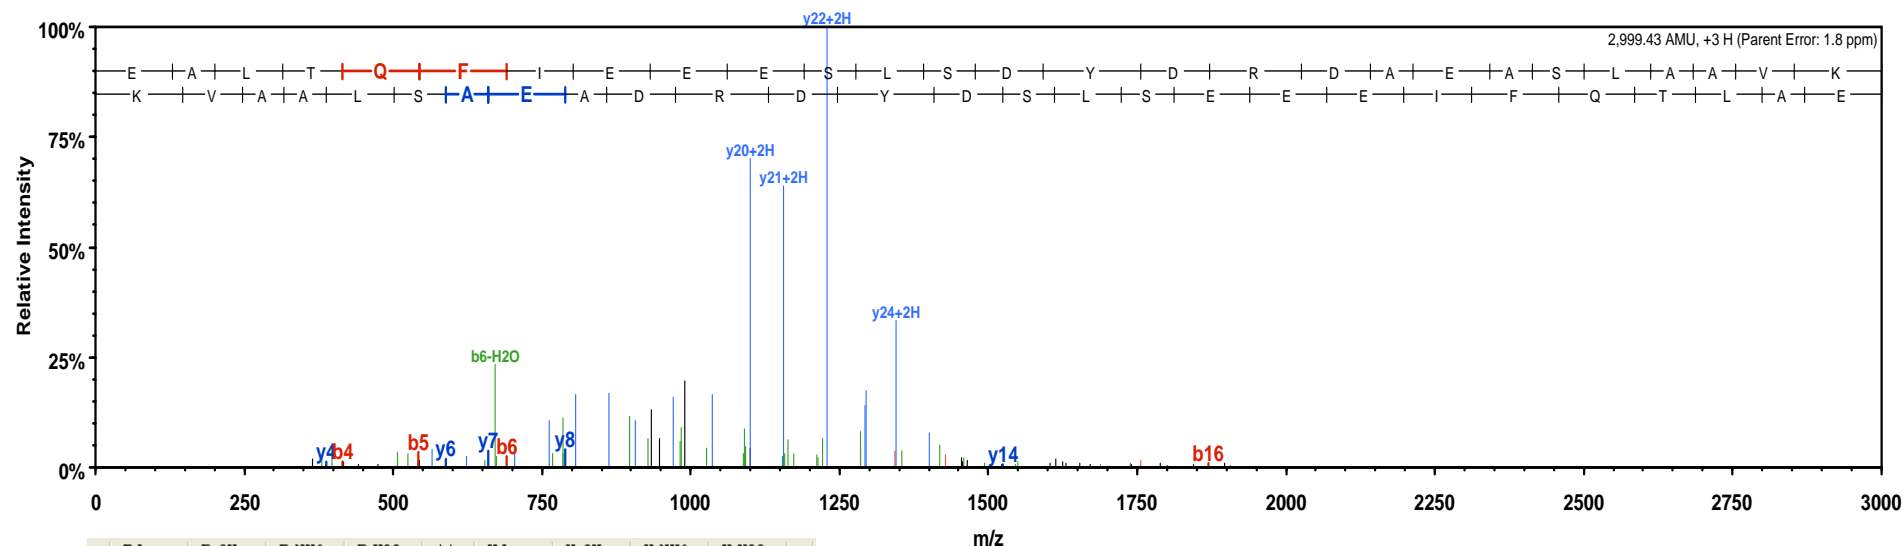

| ... | B Ions  | B+2H    | B-NH3   | B-H2O   | AA | Y Ions  | Y+2H    | Y-NH3   | Y-H2O   | ... |
|-----|---------|---------|---------|---------|----|---------|---------|---------|---------|-----|
| 1   | 130.0   |         |         | 112.0   | E  | 3,000.4 | 1,500.7 | 2,983.4 | 2,982.4 | 27  |
| 2   | 201.1   |         |         | 183.1   | A  | 2,871.4 | 1,436.2 | 2,854.4 | 2,853.4 | 26  |
| 3   | 314.2   |         |         | 296.2   | L  | 2,800.4 | 1,400.7 | 2,783.3 | 2,782.3 | 25  |
| 4   | 415.2   |         |         | 397.2   | T  | 2,687.3 | 1,344.1 | 2,670.2 | 2,669.3 | 24  |
| 5   | 543.3   |         | 526.3   | 525.3   | Q  | 2,586.2 | 1,293.6 | 2,569.2 | 2,568.2 | 23  |
| 6   | 690.3   | 345.7   | 673.3   | 672.3   | F  | 2,458.2 | 1,229.6 | 2,441.1 | 2,440.2 | 22  |
| 7   | 803.4   | 402.2   | 786.4   | 785.4   | I  | 2,311.1 | 1,156.1 | 2,294.1 | 2,293.1 | 21  |
| 8   | 932.5   | 466.7   | 915.4   | 914.5   | E  | 2,198.0 | 1,099.5 | 2,181.0 | 2,180.0 | 20  |
| 9   | 1,061.5 | 531.3   | 1,044.5 | 1,043.5 | E  | 2,069.0 | 1,035.0 | 2,051.9 | 2,051.0 | 19  |
| 10  | 1,190.6 | 595.8   | 1,173.5 | 1,172.5 | E  | 1,939.9 | 970.5   | 1,922.9 | 1,921.9 | 18  |
| 11  | 1,277.6 | 639.3   | 1,260.6 | 1,259.6 | S  | 1,810.9 | 905.9   | 1,793.9 | 1,792.9 | 17  |
| 12  | 1,390.7 | 695.8   | 1,373.6 | 1,372.7 | L  | 1,723.8 | 862.4   | 1,706.8 | 1,705.8 | 16  |
| 13  | 1,477.7 | 739.4   | 1,460.7 | 1,459.7 | S  | 1,610.8 | 805.9   | 1,593.7 | 1,592.8 | 15  |
| 14  | 1,592.7 | 796.9   | 1,575.7 | 1,574.7 | D  | 1,523.7 | 762.4   | 1,506.7 | 1,505.7 | 14  |
| 15  | 1,755.8 | 878.4   | 1,738.8 | 1,737.8 | Y  | 1,408.7 | 704.9   | 1,391.7 | 1,390.7 | 13  |
| 16  | 1,870.8 | 935.9   | 1,853.8 | 1,852.8 | D  | 1,245.6 | 623.3   | 1,228.6 | 1,227.6 | 12  |
| 17  | 2,026.9 | 1,014.0 | 2,009.9 | 2,008.9 | R  | 1,130.6 | 565.8   | 1,113.6 | 1,112.6 | 11  |
| 18  | 2,142.0 | 1,071.5 | 2,124.9 | 2,123.9 | D  | 974.5   | 487.8   | 957.5   | 956.5   | 10  |
| 19  | 2,213.0 | 1,107.0 | 2,196.0 | 2,195.0 | A  | 859.5   | 430.2   | 842.5   | 841.5   | 9   |
| 20  | 2,342.0 | 1,171.5 | 2,325.0 | 2,324.0 | E  | 788.5   | 394.7   | 771.4   | 770.4   | 8   |
| 21  | 2,413.1 | 1,207.0 | 2,396.0 | 2,395.1 | A  | 659.4   | 330.2   | 642.4   | 641.4   | 7   |
| 22  | 2,500.1 | 1,250.6 | 2,483.1 | 2,482.1 | S  | 588.4   | 294.7   | 571.3   | 570.4   | 6   |
| 23  | 2,613.2 | 1,307.1 | 2,596.2 | 2,595.2 | L  | 501.3   |         | 484.3   |         | 5   |
| 24  | 2,684.2 | 1,342.6 | 2,667.2 | 2,666.2 | A  | 388.3   |         | 371.2   |         | 4   |
| 25  | 2,755.3 | 1,378.1 | 2,738.2 | 2,737.2 | A  | 317.2   |         | 300.2   |         | 3   |
| 26  | 2,854.3 | 1,427.7 | 2,837.3 | 2,836.3 | V  | 246.2   |         | 229.2   |         | 2   |
| 27  | 3,000.4 | 1,500.7 | 2,983.4 | 2,982.4 | K  | 147.1   |         | 130.1   |         | 1   |

# Whole proteome

| Protein No. | Leading protein name  | Sequence             | Mascot Score | Variable Modifications | SILAC State | Charge | m/z       |
|-------------|-----------------------|----------------------|--------------|------------------------|-------------|--------|-----------|
| W-34        | spIQ641Q2IFA21A_HUMAN | GLFDDEDEESDLFTEAPQDR | 85.38        | Unmodified             |             | 2      | 1164.4929 |

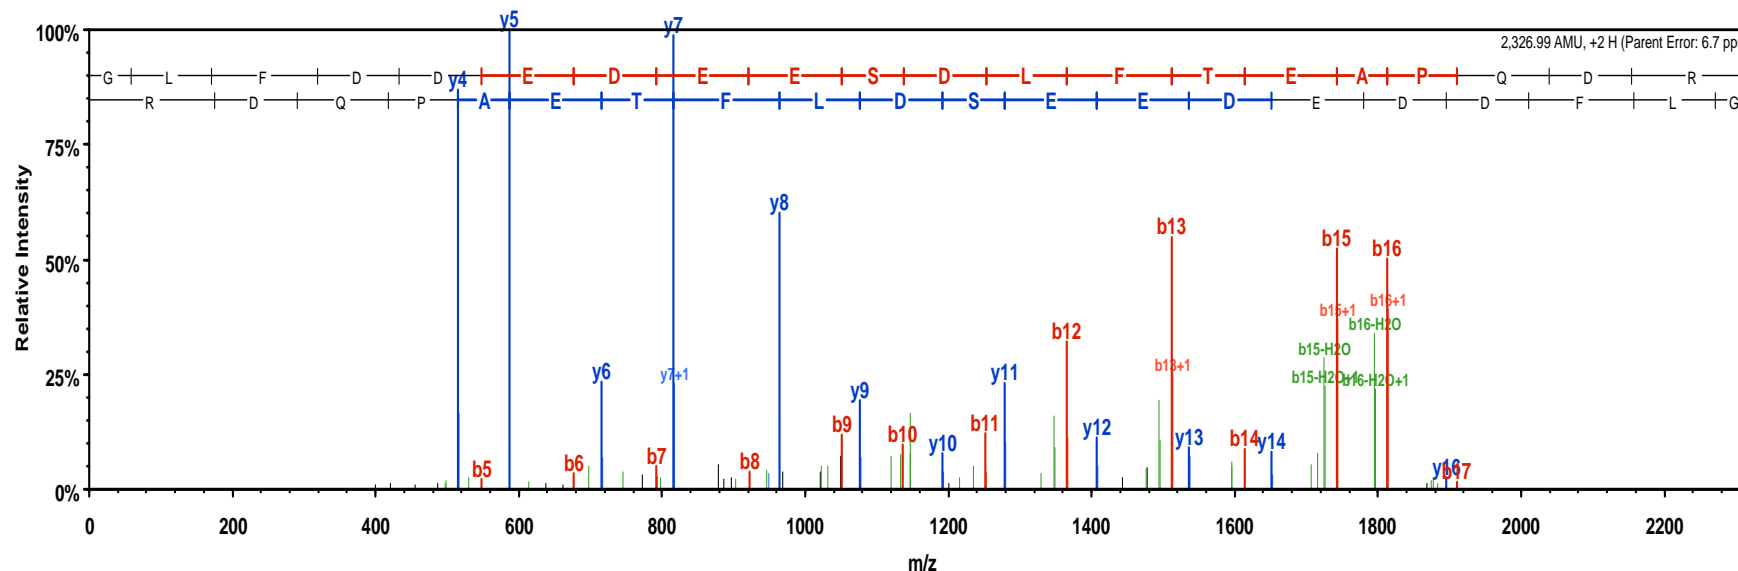

| ... | B Ions  | B+2H    | B-NH3   | B-H2O   | AA | Y Ions  | Y+2H    | Y-NH3   | Y-H2O   | ... |
|-----|---------|---------|---------|---------|----|---------|---------|---------|---------|-----|
| 1   | 58.0    |         |         |         | G  | 2,328.0 | 1,164.5 | 2,311.0 | 2,310.0 | 20  |
| 2   | 171.1   |         |         |         | L  | 2,271.0 | 1,136.0 | 2,253.9 | 2,252.9 | 19  |
| 3   | 318.2   |         |         |         | F  | 2,157.9 | 1,079.4 | 2,140.8 | 2,139.9 | 18  |
| 4   | 433.2   |         |         | 415.2   | D  | 2,010.8 | 1,005.9 | 1,993.8 | 1,992.8 | 17  |
| 5   | 548.2   |         |         | 530.2   | D  | 1,895.8 | 948.4   | 1,878.8 | 1,877.8 | 16  |
| 6   | 677.3   | 339.1   |         | 659.3   | E  | 1,780.8 | 890.9   | 1,763.7 | 1,762.7 | 15  |
| 7   | 792.3   | 396.7   |         | 774.3   | D  | 1,651.7 | 826.4   | 1,634.7 | 1,633.7 | 14  |
| 8   | 921.3   | 461.2   |         | 903.3   | E  | 1,536.7 | 768.8   | 1,519.7 | 1,518.7 | 13  |
| 9   | 1,050.4 | 525.7   |         | 1,032.4 | E  | 1,407.6 | 704.3   | 1,390.6 | 1,389.6 | 12  |
| 10  | 1,137.4 | 569.2   |         | 1,119.4 | S  | 1,278.6 | 639.8   | 1,261.6 | 1,260.6 | 11  |
| 11  | 1,252.4 | 626.7   |         | 1,234.4 | D  | 1,191.6 | 596.3   | 1,174.5 | 1,173.6 | 10  |
| 12  | 1,365.5 | 683.3   |         | 1,347.5 | L  | 1,076.5 | 538.8   | 1,059.5 | 1,058.5 | 9   |
| 13  | 1,512.6 | 756.8   |         | 1,494.6 | F  | 963.5   | 482.2   | 946.4   | 945.4   | 8   |
| 14  | 1,613.6 | 807.3   |         | 1,595.6 | T  | 816.4   | 408.7   | 799.4   | 798.4   | 7   |
| 15  | 1,742.7 | 871.8   |         | 1,724.7 | E  | 715.3   | 358.2   | 698.3   | 697.3   | 6   |
| 16  | 1,813.7 | 907.4   |         | 1,795.7 | A  | 586.3   |         | 569.3   | 568.3   | 5   |
| 17  | 1,910.8 | 955.9   |         | 1,892.8 | P  | 515.3   |         | 498.2   | 497.2   | 4   |
| 18  | 2,038.8 | 1,019.9 | 2,021.8 | 2,020.8 | Q  | 418.2   |         | 401.2   | 400.2   | 3   |
| 19  | 2,153.9 | 1,077.4 | 2,136.8 | 2,135.9 | D  | 290.1   |         | 273.1   | 272.1   | 2   |
| 20  | 2,328.0 | 1,164.5 | 2,311.0 | 2,310.0 | R  | 175.1   |         | 158.1   |         | 1   |

# Whole proteome

| Protein No. | Leading protein name  | Sequence      | Mascot Score | Variable Modifications | SILAC State | Charge | m/z       |
|-------------|-----------------------|---------------|--------------|------------------------|-------------|--------|-----------|
| W-35        | splP67775IPP2AA_HUMAN | ELDQWIEQLNECK | 85.22        | Unmodified             | Light       | 2      | 852.89852 |

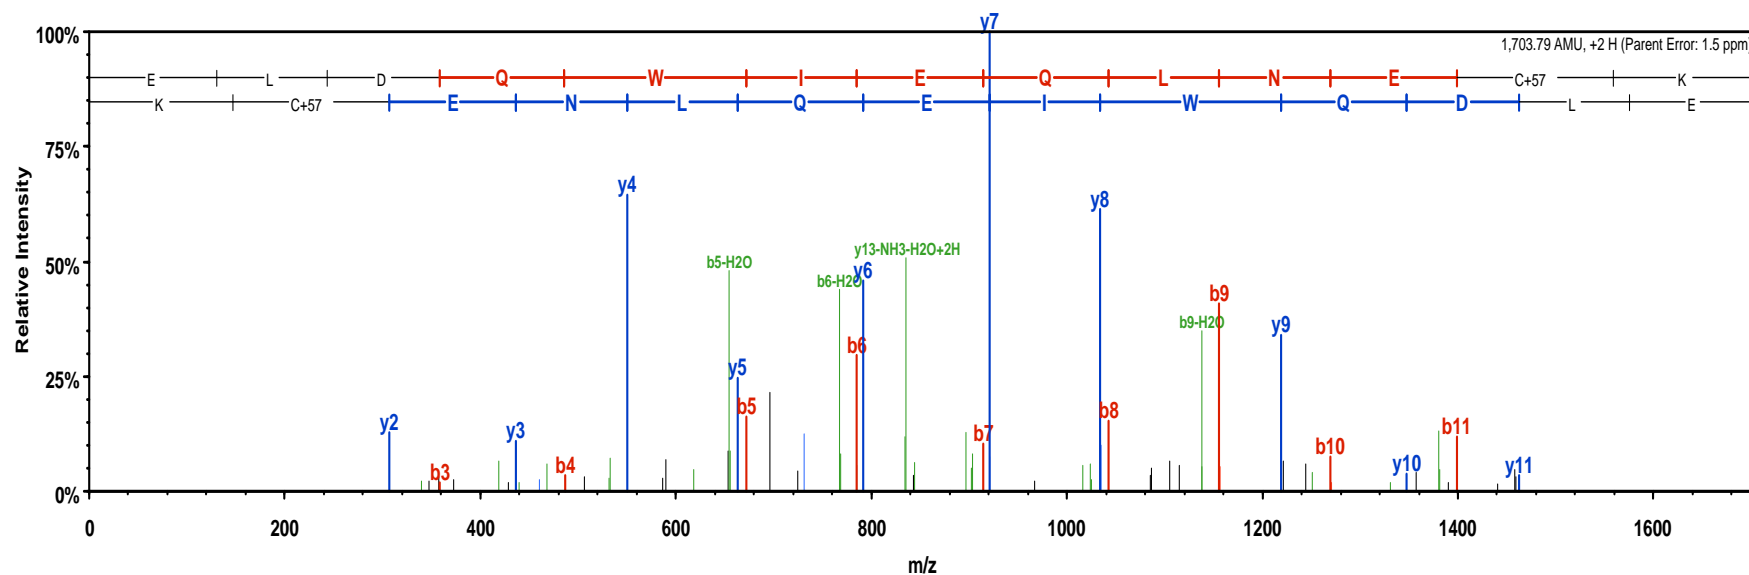

| ... | B Ions  | B+2H  | B-NH3   | B-H2O   | AA   | Y Ions  | Y+2H  | Y-NH3   | Y-H2O   | ... |
|-----|---------|-------|---------|---------|------|---------|-------|---------|---------|-----|
| 1   | 130.0   |       |         | 112.0   | E    | 1,704.8 | 852.9 | 1,687.8 | 1,686.8 | 13  |
| 2   | 243.1   |       |         | 225.1   | L    | 1,575.7 | 788.4 | 1,558.7 | 1,557.7 | 12  |
| 3   | 358.2   |       |         | 340.2   | D    | 1,462.7 | 731.8 | 1,445.6 | 1,444.7 | 11  |
| 4   | 486.2   |       | 469.2   | 468.2   | Q    | 1,347.6 | 674.3 | 1,330.6 | 1,329.6 | 10  |
| 5   | 672.3   |       | 655.3   | 654.3   | W    | 1,219.6 | 610.3 | 1,202.6 | 1,201.6 | 9   |
| 6   | 785.4   | 393.2 | 768.4   | 767.4   | I    | 1,033.5 | 517.3 | 1,016.5 | 1,015.5 | 8   |
| 7   | 914.4   | 457.7 | 897.4   | 896.4   | E    | 920.4   | 460.7 | 903.4   | 902.4   | 7   |
| 8   | 1,042.5 | 521.7 | 1,025.5 | 1,024.5 | Q    | 791.4   | 396.2 | 774.3   | 773.4   | 6   |
| 9   | 1,155.6 | 578.3 | 1,138.5 | 1,137.6 | L    | 663.3   |       | 646.3   | 645.3   | 5   |
| 10  | 1,269.6 | 635.3 | 1,252.6 | 1,251.6 | N    | 550.2   |       | 533.2   | 532.2   | 4   |
| 11  | 1,398.7 | 699.8 | 1,381.6 | 1,380.6 | E    | 436.2   |       | 419.2   | 418.2   | 3   |
| 12  | 1,558.7 | 779.8 | 1,541.7 | 1,540.7 | C+57 | 307.1   |       | 290.1   |         | 2   |
| 13  | 1,704.8 | 852.9 | 1,687.8 | 1,686.8 | K    | 147.1   |       | 130.1   |         | 1   |

# Whole proteome

| Protein No. | Leading protein name  | Sequence                      | Mascot Score | Variable Modifications | SILAC State | Charge | m/z      |
|-------------|-----------------------|-------------------------------|--------------|------------------------|-------------|--------|----------|
| W-29        | splQ8N129ICNPY4_HUMAN | EITDGEEKTEGEEEEQEEEEEEEEEGGDK | 84.72        | Unmodified             | Light       | 3      | 1124.108 |

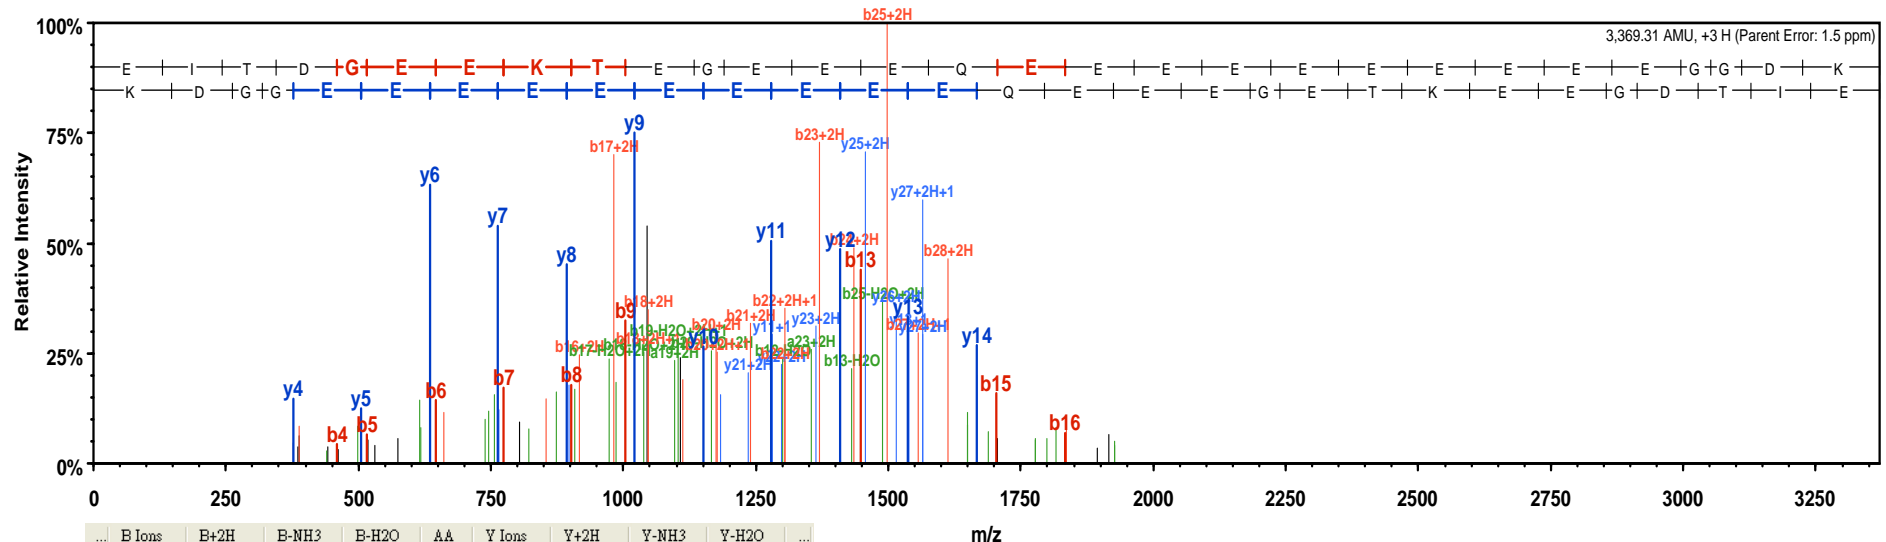

| ... | B Ions  | B+2H    | B-NH3   | B-H2O   | AA | Y Ions  | Y+2H    | Y-NH3   | Y-H2O   | ... |
|-----|---------|---------|---------|---------|----|---------|---------|---------|---------|-----|
| 1   | 130.0   |         |         | 112.0   | E  | 3,370.3 | 1,685.7 | 3,353.3 | 3,352.3 | 29  |
| 2   | 243.1   |         |         | 225.1   | I  | 3,241.3 | 1,621.1 | 3,224.2 | 3,223.3 | 28  |
| 3   | 344.2   |         |         | 326.2   | T  | 3,128.2 | 1,564.6 | 3,111.2 | 3,110.2 | 27  |
| 4   | 459.2   |         |         | 441.2   | D  | 3,027.1 | 1,514.1 | 3,010.1 | 3,009.1 | 26  |
| 5   | 516.2   |         |         | 498.2   | G  | 2,912.1 | 1,456.6 | 2,895.1 | 2,894.1 | 25  |
| 6   | 645.3   | 323.1   |         | 627.3   | E  | 2,855.1 | 1,428.0 | 2,838.1 | 2,837.1 | 24  |
| 7   | 774.3   | 387.7   |         | 756.3   | E  | 2,726.0 | 1,363.5 | 2,709.0 | 2,708.0 | 23  |
| 8   | 902.4   | 451.7   | 885.4   | 884.4   | K  | 2,597.0 | 1,299.0 | 2,580.0 | 2,579.0 | 22  |
| 9   | 1,003.5 | 502.2   | 986.4   | 985.4   | T  | 2,468.9 | 1,235.0 | 2,451.9 | 2,450.9 | 21  |
| 10  | 1,132.5 | 566.8   | 1,115.5 | 1,114.5 | E  | 2,367.9 | 1,184.4 | 2,350.8 | 2,349.8 | 20  |
| 11  | 1,189.5 | 595.3   | 1,172.5 | 1,171.5 | G  | 2,238.8 | 1,119.9 | 2,221.8 | 2,220.8 | 19  |
| 12  | 1,318.6 | 659.8   | 1,301.5 | 1,300.6 | E  | 2,181.8 | 1,091.4 | 2,164.8 | 2,163.8 | 18  |
| 13  | 1,447.6 | 724.3   | 1,430.6 | 1,429.6 | E  | 2,052.8 | 1,026.9 | 2,035.7 | 2,034.7 | 17  |
| 14  | 1,576.7 | 788.8   | 1,559.6 | 1,558.6 | E  | 1,923.7 | 962.4   | 1,906.7 | 1,905.7 | 16  |
| 15  | 1,704.7 | 852.9   | 1,687.7 | 1,686.7 | Q  | 1,794.7 | 897.8   | 1,777.6 | 1,776.7 | 15  |
| 16  | 1,833.8 | 917.4   | 1,816.7 | 1,815.7 | E  | 1,666.6 | 833.8   | 1,649.6 | 1,648.6 | 14  |
| 17  | 1,962.8 | 981.9   | 1,945.8 | 1,944.8 | E  | 1,537.6 | 769.3   | 1,520.5 | 1,519.6 | 13  |
| 18  | 2,091.8 | 1,046.4 | 2,074.8 | 2,073.8 | E  | 1,408.5 | 704.8   | 1,391.5 | 1,390.5 | 12  |
| 19  | 2,220.9 | 1,110.9 | 2,203.9 | 2,202.9 | E  | 1,279.5 | 640.2   | 1,262.5 | 1,261.5 | 11  |
| 20  | 2,349.9 | 1,175.5 | 2,332.9 | 2,331.9 | E  | 1,150.4 | 575.7   | 1,133.4 | 1,132.4 | 10  |
| 21  | 2,479.0 | 1,240.0 | 2,461.9 | 2,461.0 | E  | 1,021.4 | 511.2   | 1,004.4 | 1,003.4 | 9   |
| 22  | 2,608.0 | 1,304.5 | 2,591.0 | 2,590.0 | E  | 892.4   | 446.7   | 875.3   | 874.3   | 8   |
| 23  | 2,737.0 | 1,369.0 | 2,720.0 | 2,719.0 | E  | 763.3   | 382.2   | 746.3   | 745.3   | 7   |
| 24  | 2,866.1 | 1,433.5 | 2,849.1 | 2,848.1 | E  | 634.3   | 317.6   | 617.2   | 616.3   | 6   |
| 25  | 2,995.1 | 1,498.1 | 2,978.1 | 2,977.1 | E  | 505.2   |         | 488.2   | 487.2   | 5   |
| 26  | 3,052.2 | 1,526.6 | 3,035.1 | 3,034.1 | G  | 376.2   |         | 359.2   | 358.2   | 4   |
| 27  | 3,109.2 | 1,555.1 | 3,092.2 | 3,091.2 | G  | 319.2   |         | 302.1   | 301.2   | 3   |
| 28  | 3,224.2 | 1,612.6 | 3,207.2 | 3,206.2 | D  | 262.1   |         | 245.1   | 244.1   | 2   |
| 29  | 3,370.3 | 1,685.7 | 3,353.3 | 3,352.3 | K  | 147.1   |         | 130.1   |         | 1   |

# Whole proteome

| Protein No. | Leading protein name | Sequence              | Mascot Score | Variable Modifications | SILAC State | Charge | m/z      |
|-------------|----------------------|-----------------------|--------------|------------------------|-------------|--------|----------|
| W-30        | sp P50542 PEX5_HUMAN | DAEAHPWLSDYDDLTSATYDK | 84.51        | Unmodified             | Light       | 2      | 1207.027 |

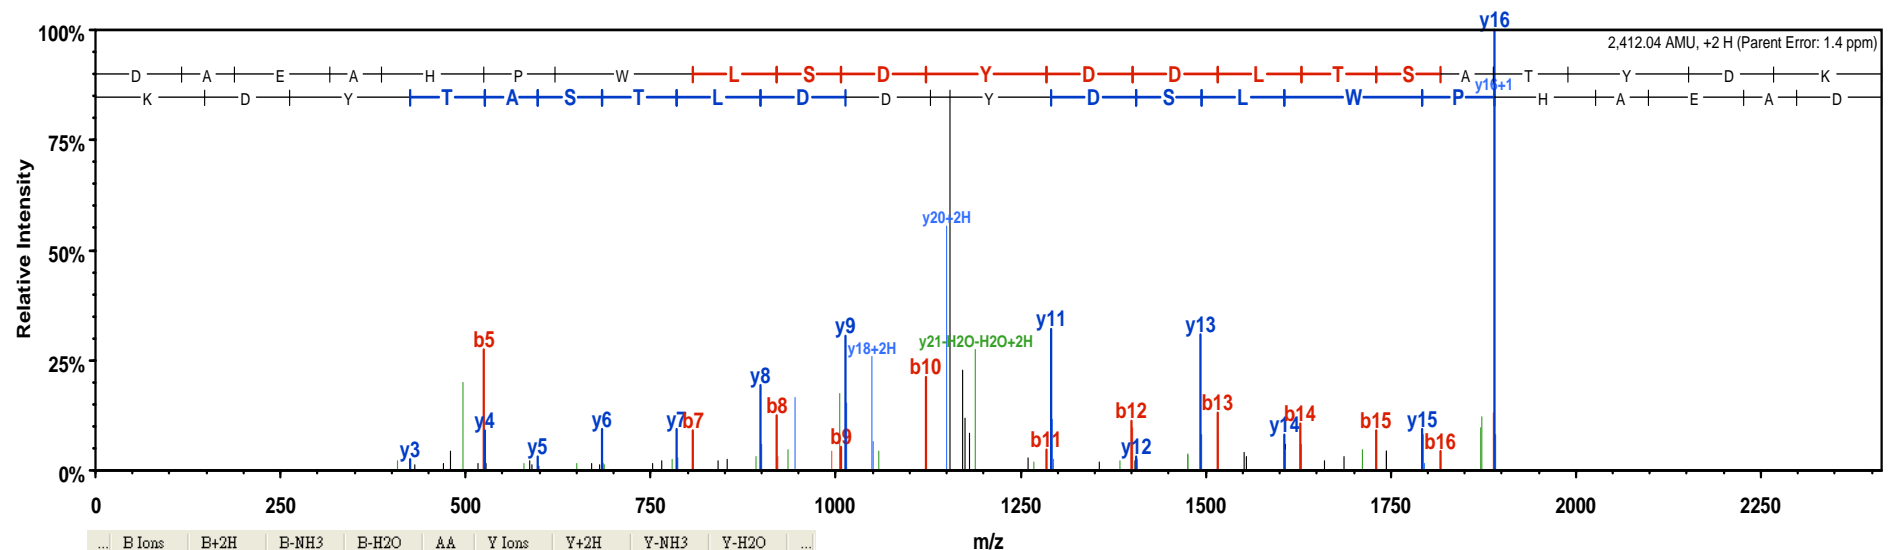

| ... | B Ions  | B+2H    | B-NH3   | B-H2O   | AA | Y Ions  | Y+2H    | Y-NH3   | Y-H2O   | ... |
|-----|---------|---------|---------|---------|----|---------|---------|---------|---------|-----|
| 1   | 116.0   |         |         | 98.0    | D  | 2,413.0 | 1,207.0 | 2,396.0 | 2,395.0 | 21  |
| 2   | 187.1   |         |         | 169.1   | A  | 2,298.0 | 1,149.5 | 2,281.0 | 2,280.0 | 20  |
| 3   | 316.1   |         |         | 298.1   | E  | 2,227.0 | 1,114.0 | 2,210.0 | 2,209.0 | 19  |
| 4   | 387.2   |         |         | 369.1   | A  | 2,097.9 | 1,049.5 | 2,080.9 | 2,079.9 | 18  |
| 5   | 524.2   | 262.6   |         | 506.2   | H  | 2,026.9 | 1,014.0 | 2,009.9 | 2,008.9 | 17  |
| 6   | 621.3   | 311.1   |         | 603.3   | P  | 1,889.8 | 945.4   | 1,872.8 | 1,871.8 | 16  |
| 7   | 807.3   | 404.2   |         | 789.3   | W  | 1,792.8 | 896.9   | 1,775.8 | 1,774.8 | 15  |
| 8   | 920.4   | 460.7   |         | 902.4   | L  | 1,606.7 | 803.9   | 1,589.7 | 1,588.7 | 14  |
| 9   | 1,007.5 | 504.2   |         | 989.4   | S  | 1,493.6 | 747.3   | 1,476.6 | 1,475.6 | 13  |
| 10  | 1,122.5 | 561.7   |         | 1,104.5 | D  | 1,406.6 | 703.8   | 1,389.6 | 1,388.6 | 12  |
| 11  | 1,285.5 | 643.3   |         | 1,267.5 | Y  | 1,291.6 | 646.3   | 1,274.5 | 1,273.6 | 11  |
| 12  | 1,400.6 | 700.8   |         | 1,382.6 | D  | 1,128.5 | 564.8   | 1,111.5 | 1,110.5 | 10  |
| 13  | 1,515.6 | 758.3   |         | 1,497.6 | D  | 1,013.5 | 507.2   | 996.5   | 995.5   | 9   |
| 14  | 1,628.7 | 814.8   |         | 1,610.7 | L  | 898.5   | 449.7   | 881.4   | 880.4   | 8   |
| 15  | 1,729.7 | 865.4   |         | 1,711.7 | T  | 785.4   | 393.2   | 768.3   | 767.4   | 7   |
| 16  | 1,816.8 | 908.9   |         | 1,798.8 | S  | 684.3   | 342.7   | 667.3   | 666.3   | 6   |
| 17  | 1,887.8 | 944.4   |         | 1,869.8 | A  | 597.3   |         | 580.3   | 579.3   | 5   |
| 18  | 1,988.9 | 994.9   |         | 1,970.8 | T  | 526.3   |         | 509.2   | 508.2   | 4   |
| 19  | 2,151.9 | 1,076.5 |         | 2,133.9 | Y  | 425.2   |         | 408.2   | 407.2   | 3   |
| 20  | 2,266.9 | 1,134.0 |         | 2,248.9 | D  | 262.1   |         | 245.1   | 244.1   | 2   |
| 21  | 2,413.0 | 1,207.0 | 2,396.0 | 2,395.0 | K  | 147.1   |         | 130.1   |         | 1   |

# Whole proteome

| Protein No. | Leading protein name  | Sequence                | Mascot Score | Variable Modifications | SILAC State | Charge | m/z       |
|-------------|-----------------------|-------------------------|--------------|------------------------|-------------|--------|-----------|
| W-31        | sp Q9C035 TRIM5_HUMAN | DILDWEESNELQNLEKEEEDILK | 84.15        | Unmodified             | Light       | 3      | 944.45382 |

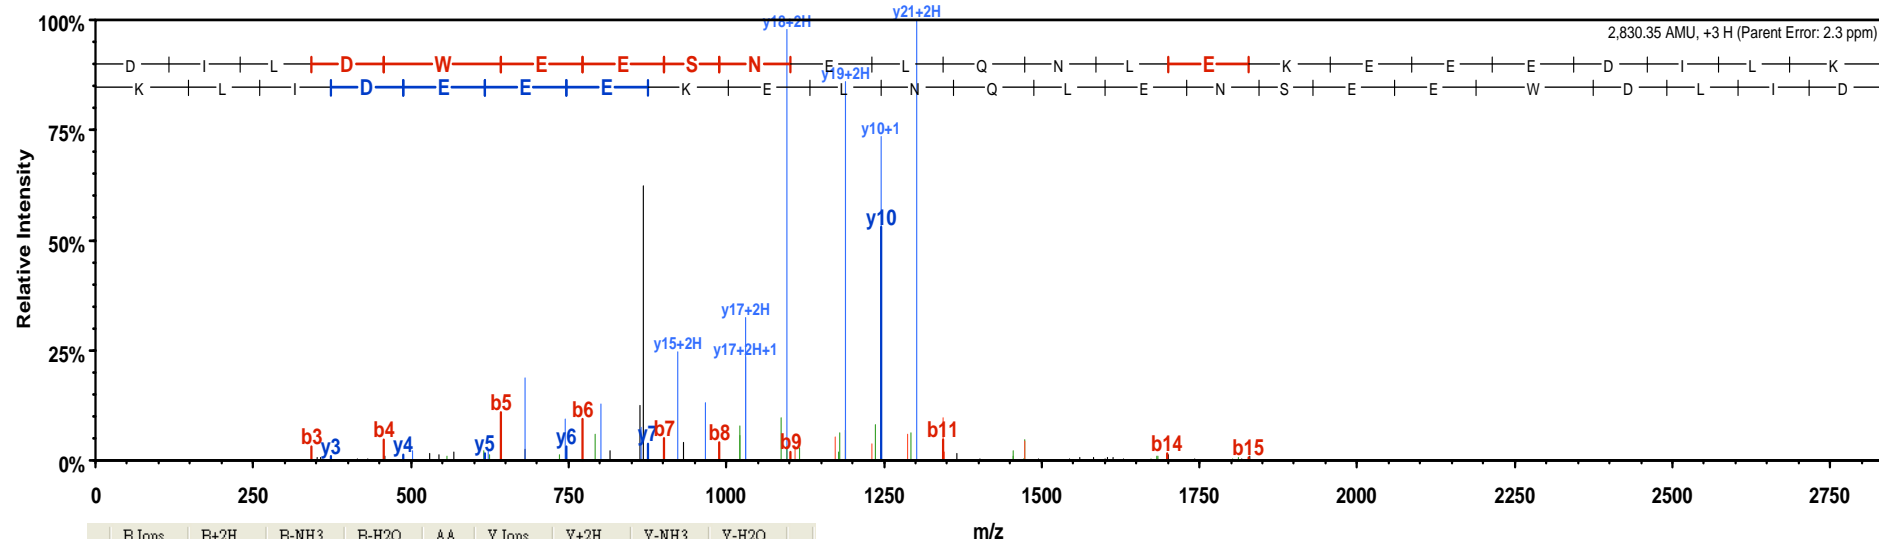

| ... | B Ions  | B+2H    | B-NH3   | B-H2O   | AA | Y Ions  | Y+2H    | Y-NH3   | Y-H2O   | ... |
|-----|---------|---------|---------|---------|----|---------|---------|---------|---------|-----|
| 1   | 116.0   |         |         | 98.0    | D  | 2,831.3 | 1,416.2 | 2,814.3 | 2,813.3 | 23  |
| 2   | 229.1   |         |         | 211.1   | I  | 2,716.3 | 1,358.7 | 2,699.3 | 2,698.3 | 22  |
| 3   | 342.2   |         |         | 324.2   | L  | 2,603.2 | 1,302.1 | 2,586.2 | 2,585.2 | 21  |
| 4   | 457.2   |         |         | 439.2   | D  | 2,490.2 | 1,245.6 | 2,473.1 | 2,472.1 | 20  |
| 5   | 643.3   |         |         | 625.3   | W  | 2,375.1 | 1,188.1 | 2,358.1 | 2,357.1 | 19  |
| 6   | 772.4   | 386.7   |         | 754.3   | E  | 2,189.0 | 1,095.0 | 2,172.0 | 2,171.0 | 18  |
| 7   | 901.4   | 451.2   |         | 883.4   | E  | 2,060.0 | 1,030.5 | 2,043.0 | 2,042.0 | 17  |
| 8   | 988.4   | 494.7   |         | 970.4   | S  | 1,931.0 | 966.0   | 1,913.9 | 1,912.9 | 16  |
| 9   | 1,102.5 | 551.7   | 1,085.4 | 1,084.5 | N  | 1,843.9 | 922.5   | 1,826.9 | 1,825.9 | 15  |
| 10  | 1,231.5 | 616.3   | 1,214.5 | 1,213.5 | E  | 1,729.9 | 865.4   | 1,712.9 | 1,711.9 | 14  |
| 11  | 1,344.6 | 672.8   | 1,327.6 | 1,326.6 | L  | 1,600.8 | 800.9   | 1,583.8 | 1,582.8 | 13  |
| 12  | 1,472.7 | 736.8   | 1,455.6 | 1,454.6 | Q  | 1,487.8 | 744.4   | 1,470.7 | 1,469.7 | 12  |
| 13  | 1,586.7 | 793.9   | 1,569.7 | 1,568.7 | N  | 1,359.7 | 680.4   | 1,342.7 | 1,341.7 | 11  |
| 14  | 1,699.8 | 850.4   | 1,682.8 | 1,681.8 | L  | 1,245.7 | 623.3   | 1,228.6 | 1,227.6 | 10  |
| 15  | 1,828.8 | 914.9   | 1,811.8 | 1,810.8 | E  | 1,132.6 | 566.8   | 1,115.5 | 1,114.6 | 9   |
| 16  | 1,956.9 | 979.0   | 1,939.9 | 1,938.9 | K  | 1,003.5 | 502.3   | 986.5   | 985.5   | 8   |
| 17  | 2,086.0 | 1,043.5 | 2,068.9 | 2,068.0 | E  | 875.4   | 438.2   | 858.4   | 857.4   | 7   |
| 18  | 2,215.0 | 1,108.0 | 2,198.0 | 2,197.0 | E  | 746.4   | 373.7   | 729.4   | 728.4   | 6   |
| 19  | 2,344.0 | 1,172.5 | 2,327.0 | 2,326.0 | E  | 617.4   |         | 600.3   | 599.3   | 5   |
| 20  | 2,459.1 | 1,230.0 | 2,442.0 | 2,441.1 | D  | 488.3   |         | 471.3   | 470.3   | 4   |
| 21  | 2,572.2 | 1,286.6 | 2,555.1 | 2,554.1 | I  | 373.3   |         | 356.3   |         | 3   |
| 22  | 2,685.2 | 1,343.1 | 2,668.2 | 2,667.2 | L  | 260.2   |         | 243.2   |         | 2   |
| 23  | 2,831.3 | 1,416.2 | 2,814.3 | 2,813.3 | K  | 147.1   |         | 130.1   |         | 1   |

# Whole proteome

| Protein No. | Leading protein name  | Sequence         | Mascot Score | Variable Modifications | SILAC State | Charge | m/z       |
|-------------|-----------------------|------------------|--------------|------------------------|-------------|--------|-----------|
| W-32        | sp Q14061 COX17_HUMAN | PGLVDSNPAPPESQEK | 83.93        | Unmodified             | Light       | 2      | 832.90994 |

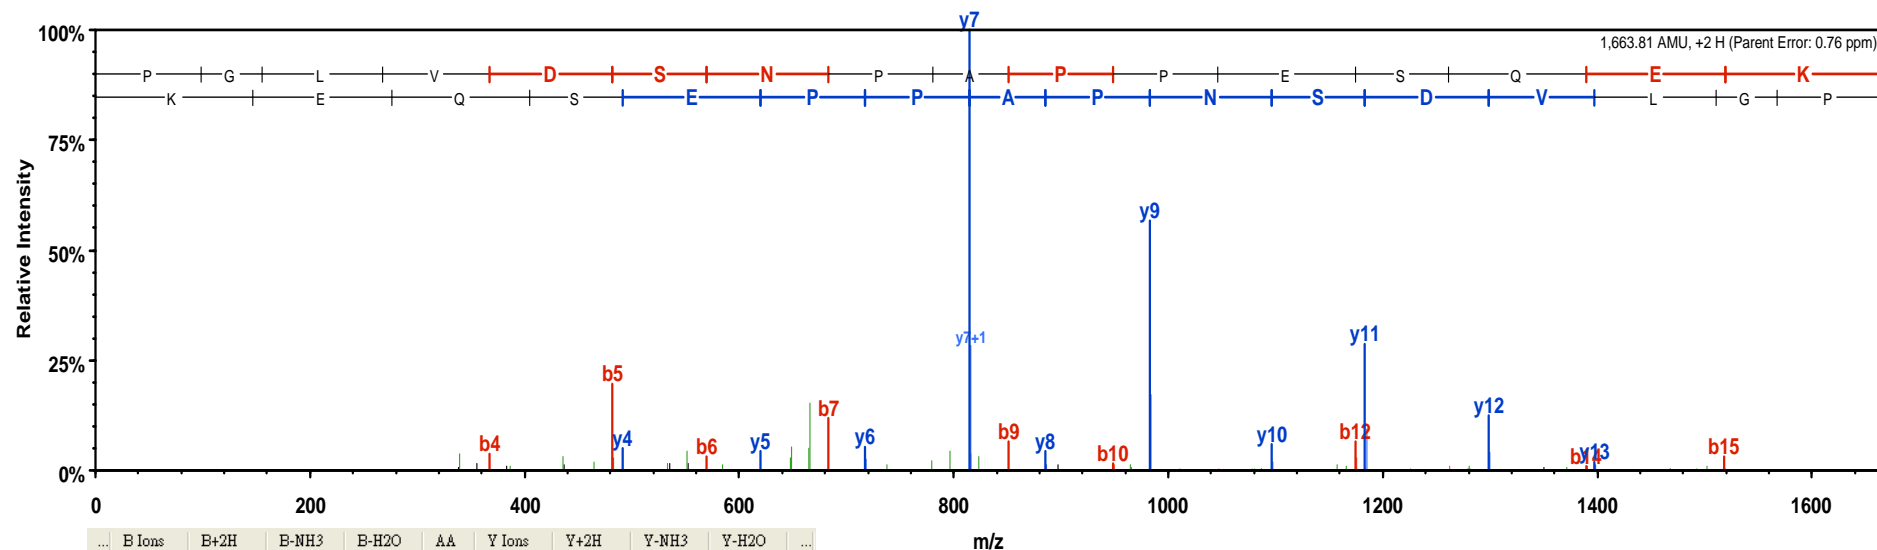

| ... | B Ions  | B+2H  | B-NH3   | B-H2O   | AA | Y Ions  | Y+2H  | Y-NH3   | Y-H2O   | ... |
|-----|---------|-------|---------|---------|----|---------|-------|---------|---------|-----|
| 1   | 98.1    |       |         |         | P  | 1,664.8 | 832.9 | 1,647.8 | 1,646.8 | 16  |
| 2   | 155.1   |       |         |         | G  | 1,567.8 | 784.4 | 1,550.7 | 1,549.7 | 15  |
| 3   | 268.2   |       |         |         | L  | 1,510.7 | 755.9 | 1,493.7 | 1,492.7 | 14  |
| 4   | 367.2   |       |         |         | V  | 1,397.7 | 699.3 | 1,380.6 | 1,379.6 | 13  |
| 5   | 482.3   |       |         | 464.3   | D  | 1,298.6 | 649.8 | 1,281.6 | 1,280.6 | 12  |
| 6   | 569.3   | 285.2 |         | 551.3   | S  | 1,183.6 | 592.3 | 1,166.5 | 1,165.5 | 11  |
| 7   | 683.3   | 342.2 | 666.3   | 665.3   | N  | 1,096.5 | 548.8 | 1,079.5 | 1,078.5 | 10  |
| 8   | 780.4   | 390.7 | 763.4   | 762.4   | P  | 982.5   | 491.7 | 965.5   | 964.5   | 9   |
| 9   | 851.4   | 426.2 | 834.4   | 833.4   | A  | 885.4   | 443.2 | 868.4   | 867.4   | 8   |
| 10  | 948.5   | 474.7 | 931.5   | 930.5   | P  | 814.4   | 407.7 | 797.4   | 796.4   | 7   |
| 11  | 1,045.5 | 523.3 | 1,028.5 | 1,027.5 | P  | 717.3   | 359.2 | 700.3   | 699.3   | 6   |
| 12  | 1,174.6 | 587.8 | 1,157.5 | 1,156.6 | E  | 620.3   |       | 603.3   | 602.3   | 5   |
| 13  | 1,261.6 | 631.3 | 1,244.6 | 1,243.6 | S  | 491.2   |       | 474.2   | 473.2   | 4   |
| 14  | 1,389.7 | 695.3 | 1,372.6 | 1,371.7 | Q  | 404.2   |       | 387.2   | 386.2   | 3   |
| 15  | 1,518.7 | 759.9 | 1,501.7 | 1,500.7 | E  | 276.2   |       | 259.1   | 258.1   | 2   |
| 16  | 1,664.8 | 832.9 | 1,647.8 | 1,646.8 | K  | 147.1   |       | 130.1   |         | 1   |



# Whole proteome

| Protein No. | Leading protein name  | Sequence      | Mascot Score | Variable Modifications  | SILAC State | Charge | m/z       |
|-------------|-----------------------|---------------|--------------|-------------------------|-------------|--------|-----------|
| W-33        | splQ8IV20ICM031_HUMAN | AEAVLIDLFLGLK | 82.22        | Acetyl (Protein N-term) | Light       | 2      | 665.88448 |

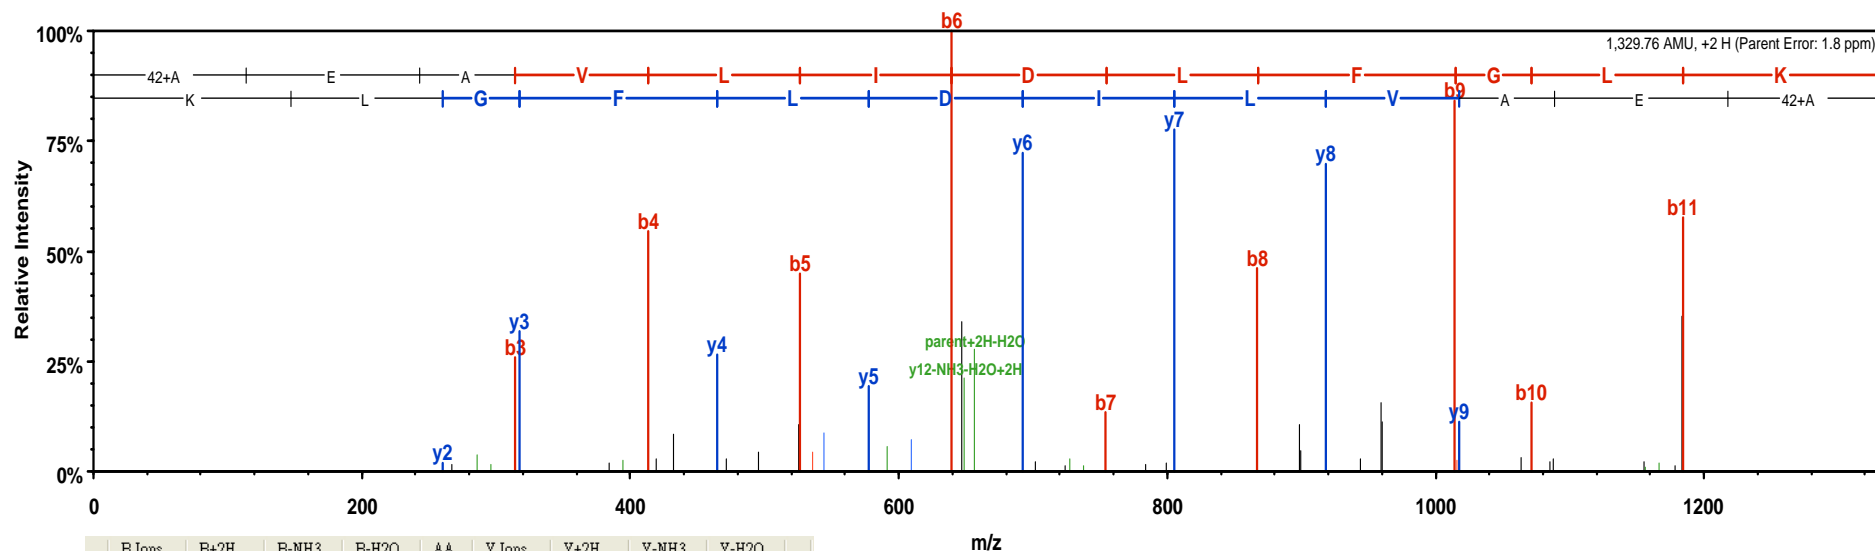

| ... | B Ions  | B+2H  | B-NH3   | B-H2O   | AA   | Y Ions  | Y+2H  | Y-NH3   | Y-H2O   | ... |
|-----|---------|-------|---------|---------|------|---------|-------|---------|---------|-----|
| 1   | 114.1   |       |         |         | A+42 | 1,330.8 | 665.9 | 1,313.7 | 1,312.8 | 12  |
| 2   | 243.1   |       |         | 225.1   | E    | 1,217.7 | 609.4 | 1,200.7 | 1,199.7 | 11  |
| 3   | 314.1   |       |         | 296.1   | A    | 1,088.7 | 544.8 | 1,071.6 | 1,070.7 | 10  |
| 4   | 413.2   |       |         | 395.2   | V    | 1,017.6 | 509.3 | 1,000.6 | 999.6   | 9   |
| 5   | 526.3   |       |         | 508.3   | L    | 918.6   | 459.8 | 901.5   | 900.6   | 8   |
| 6   | 639.4   | 320.2 |         | 621.4   | I    | 805.5   | 403.2 | 788.5   | 787.5   | 7   |
| 7   | 754.4   | 377.7 |         | 736.4   | D    | 692.4   | 346.7 | 675.4   | 674.4   | 6   |
| 8   | 867.5   | 434.2 |         | 849.5   | L    | 577.4   |       | 560.3   |         | 5   |
| 9   | 1,014.6 | 507.8 |         | 996.5   | F    | 464.3   |       | 447.3   |         | 4   |
| 10  | 1,071.6 | 536.3 |         | 1,053.6 | G    | 317.2   |       | 300.2   |         | 3   |
| 11  | 1,184.7 | 592.8 |         | 1,166.6 | L    | 260.2   |       | 243.2   |         | 2   |
| 12  | 1,330.8 | 665.9 | 1,313.7 | 1,312.8 | K    | 147.1   |       | 130.1   |         | 1   |

# Whole proteome

| Protein No. | Leading protein name  | Sequence           | Mascot Score | Variable Modifications | SILAC State | Charge | m/z       |
|-------------|-----------------------|--------------------|--------------|------------------------|-------------|--------|-----------|
| W-34        | sp P82664 IRT10_HUMAN | DLTKPVVTISDEPDILYK | 81.44        | Unmodified             | Heavy       | 2      | 1023.5539 |

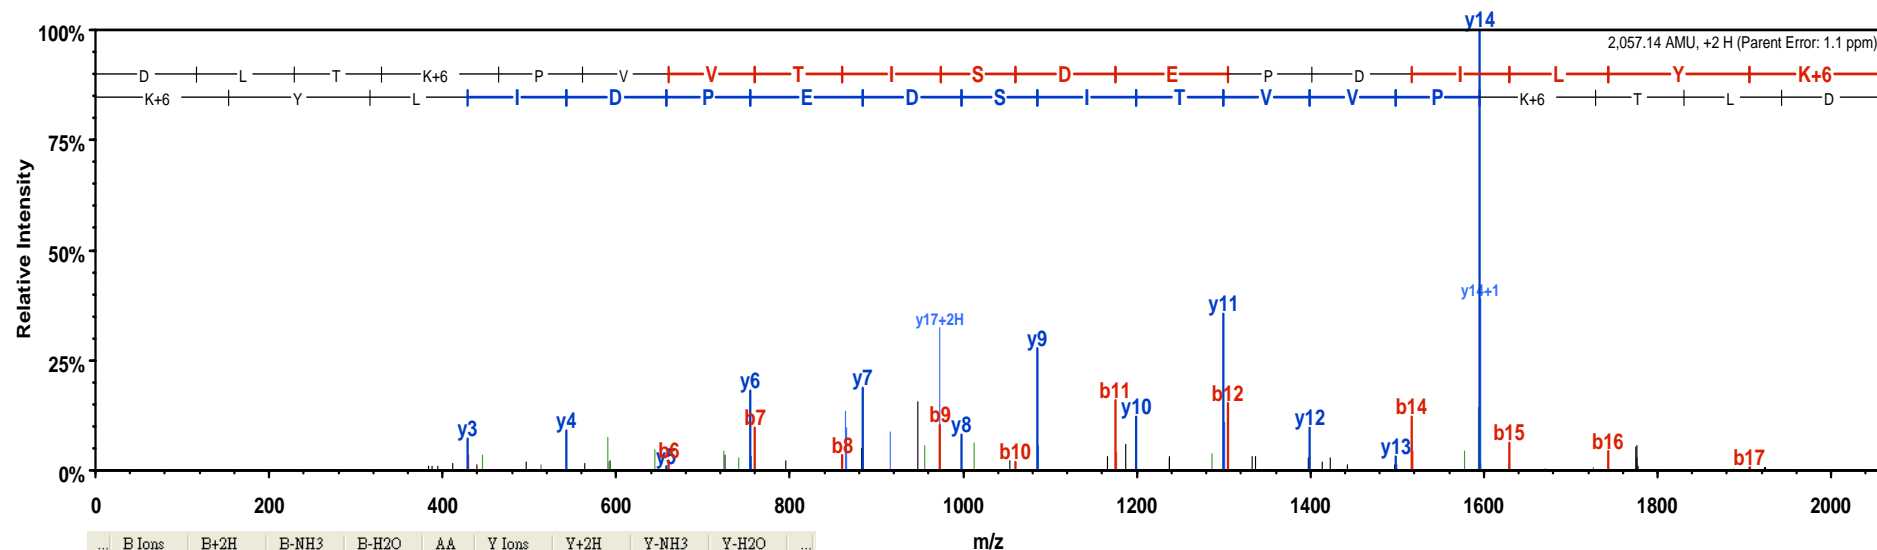

| ... | B Ions  | B+2H    | B-NH3   | B-H2O   | AA  | Y Ions  | Y+2H    | Y-NH3   | Y-H2O   | ... |
|-----|---------|---------|---------|---------|-----|---------|---------|---------|---------|-----|
| 1   | 116.0   |         |         | 98.0    | D   | 2,058.1 | 1,029.6 | 2,041.1 | 2,040.1 | 18  |
| 2   | 229.1   |         |         | 211.1   | L   | 1,943.1 | 972.1   | 1,926.1 | 1,925.1 | 17  |
| 3   | 330.2   |         |         | 312.2   | T   | 1,830.0 | 915.5   | 1,813.0 | 1,812.0 | 16  |
| 4   | 464.3   | 232.6   | 447.3   | 446.3   | K+6 | 1,729.0 | 865.0   | 1,712.0 | 1,711.0 | 15  |
| 5   | 561.3   | 281.2   | 544.3   | 543.3   | P   | 1,594.9 | 797.9   | 1,577.8 | 1,576.9 | 14  |
| 6   | 660.4   | 330.7   | 643.4   | 642.4   | V   | 1,497.8 | 749.4   | 1,480.8 | 1,479.8 | 13  |
| 7   | 759.5   | 380.2   | 742.4   | 741.5   | V   | 1,398.7 | 699.9   | 1,381.7 | 1,380.7 | 12  |
| 8   | 860.5   | 430.8   | 843.5   | 842.5   | T   | 1,299.7 | 650.3   | 1,282.7 | 1,281.7 | 11  |
| 9   | 973.6   | 487.3   | 956.6   | 955.6   | I   | 1,198.6 | 599.8   | 1,181.6 | 1,180.6 | 10  |
| 10  | 1,060.6 | 530.8   | 1,043.6 | 1,042.6 | S   | 1,085.5 | 543.3   | 1,068.5 | 1,067.5 | 9   |
| 11  | 1,175.7 | 588.3   | 1,158.6 | 1,157.7 | D   | 998.5   | 499.8   | 981.5   | 980.5   | 8   |
| 12  | 1,304.7 | 652.9   | 1,287.7 | 1,286.7 | E   | 883.5   | 442.2   | 866.5   | 865.5   | 7   |
| 13  | 1,401.8 | 701.4   | 1,384.7 | 1,383.7 | P   | 754.4   | 377.7   | 737.4   | 736.4   | 6   |
| 14  | 1,516.8 | 758.9   | 1,499.8 | 1,498.8 | D   | 657.4   |         | 640.4   | 639.4   | 5   |
| 15  | 1,629.9 | 815.4   | 1,612.8 | 1,611.9 | I   | 542.4   |         | 525.3   |         | 4   |
| 16  | 1,743.0 | 872.0   | 1,725.9 | 1,724.9 | L   | 429.3   |         | 412.3   |         | 3   |
| 17  | 1,906.0 | 953.5   | 1,889.0 | 1,888.0 | Y   | 316.2   |         | 299.2   |         | 2   |
| 18  | 2,058.1 | 1,029.6 | 2,041.1 | 2,040.1 | K+6 | 153.1   |         | 136.1   |         | 1   |

# Whole proteome

| Protein No. | Leading protein name | Sequence                      | Mascot Score | Variable Modifications   | SILAC State | Charge | m/z       |
|-------------|----------------------|-------------------------------|--------------|--------------------------|-------------|--------|-----------|
| W-35        | sp P40426 PBX3_HUMAN | QATEILNEYFYSHLSNPYPSEEAKEELAK | 80.37        | Gln->pyro-Glu (N-term Q) | Light       | 3      | 1128.5367 |

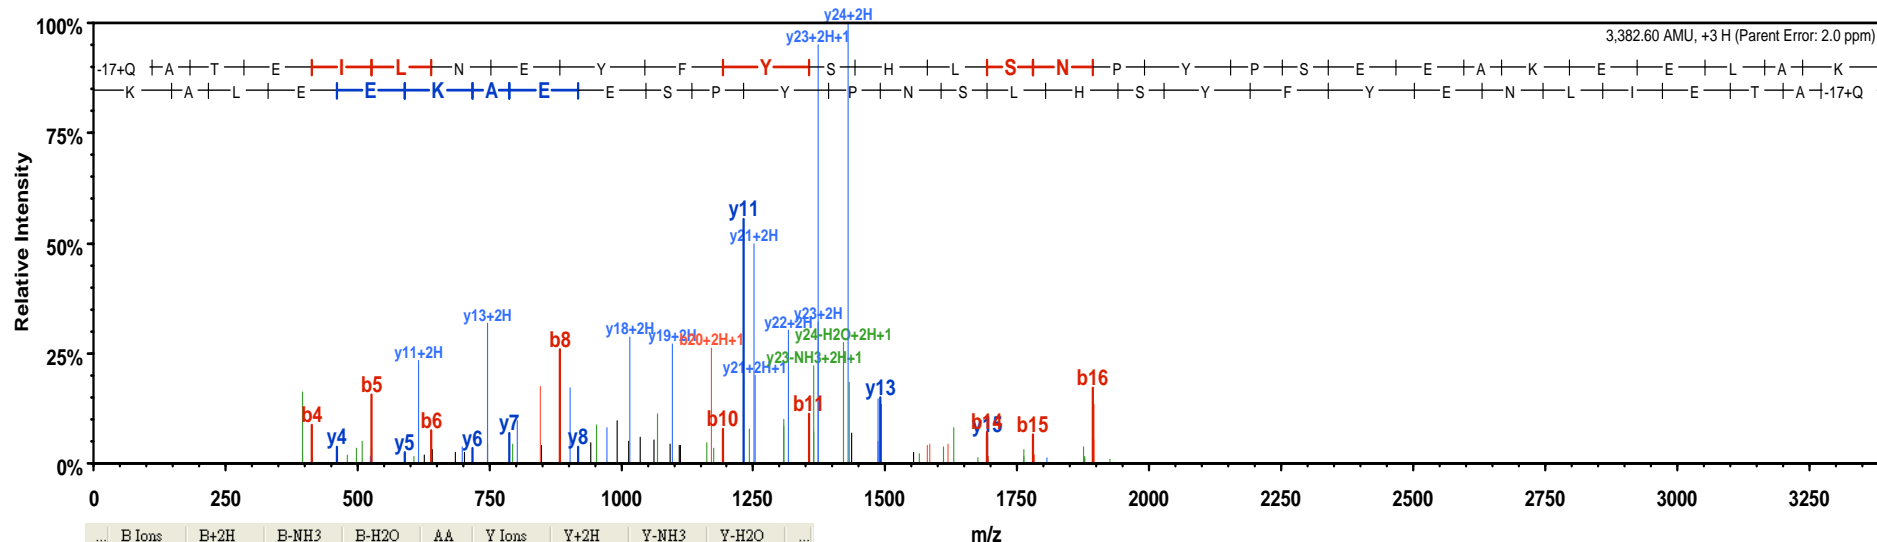

| ... | B Ions  | B+2H    | B-NH3   | B-H2O   | AA   | Y Ions  | Y+2H    | Y-NH3   | Y-H2O   | ... |
|-----|---------|---------|---------|---------|------|---------|---------|---------|---------|-----|
| 1   | 112.0   |         | 95.0    |         | Q-17 | 3,383.6 | 1,692.3 | 3,366.6 | 3,365.6 | 29  |
| 2   | 183.1   |         | 166.0   |         | A    | 3,272.6 | 1,636.8 | 3,255.5 | 3,254.6 | 28  |
| 3   | 284.1   |         | 267.1   | 266.1   | T    | 3,201.5 | 1,601.3 | 3,184.5 | 3,183.5 | 27  |
| 4   | 413.2   |         | 396.1   | 395.2   | E    | 3,100.5 | 1,550.7 | 3,083.5 | 3,082.5 | 26  |
| 5   | 526.3   |         | 509.2   | 508.2   | I    | 2,971.4 | 1,486.2 | 2,954.4 | 2,953.4 | 25  |
| 6   | 639.3   | 320.2   | 622.3   | 621.3   | L    | 2,858.4 | 1,429.7 | 2,841.3 | 2,840.3 | 24  |
| 7   | 753.4   | 377.2   | 736.4   | 735.4   | N    | 2,745.3 | 1,373.1 | 2,728.2 | 2,727.3 | 23  |
| 8   | 882.4   | 441.7   | 865.4   | 864.4   | E    | 2,631.2 | 1,316.1 | 2,614.2 | 2,613.2 | 22  |
| 9   | 1,045.5 | 523.2   | 1,028.5 | 1,027.5 | Y    | 2,502.2 | 1,251.6 | 2,485.2 | 2,484.2 | 21  |
| 10  | 1,192.6 | 596.8   | 1,175.5 | 1,174.5 | F    | 2,339.1 | 1,170.1 | 2,322.1 | 2,321.1 | 20  |
| 11  | 1,355.6 | 678.3   | 1,338.6 | 1,337.6 | Y    | 2,192.1 | 1,096.5 | 2,175.0 | 2,174.0 | 19  |
| 12  | 1,442.6 | 721.8   | 1,425.6 | 1,424.6 | S    | 2,029.0 | 1,015.0 | 2,012.0 | 2,011.0 | 18  |
| 13  | 1,579.7 | 790.4   | 1,562.7 | 1,561.7 | H    | 1,942.0 | 971.5   | 1,924.9 | 1,923.9 | 17  |
| 14  | 1,692.8 | 846.9   | 1,675.8 | 1,674.8 | L    | 1,804.9 | 903.0   | 1,787.9 | 1,786.9 | 16  |
| 15  | 1,779.8 | 890.4   | 1,762.8 | 1,761.8 | S    | 1,691.8 | 846.4   | 1,674.8 | 1,673.8 | 15  |
| 16  | 1,893.9 | 947.4   | 1,876.8 | 1,875.9 | N    | 1,604.8 | 802.9   | 1,587.8 | 1,586.8 | 14  |
| 17  | 1,990.9 | 996.0   | 1,973.9 | 1,972.9 | P    | 1,490.7 | 745.9   | 1,473.7 | 1,472.7 | 13  |
| 18  | 2,154.0 | 1,077.5 | 2,137.0 | 2,136.0 | Y    | 1,393.7 | 697.3   | 1,376.7 | 1,375.7 | 12  |
| 19  | 2,251.0 | 1,126.0 | 2,234.0 | 2,233.0 | P    | 1,230.6 | 615.8   | 1,213.6 | 1,212.6 | 11  |
| 20  | 2,338.1 | 1,169.5 | 2,321.0 | 2,320.1 | S    | 1,133.6 | 567.3   | 1,116.5 | 1,115.6 | 10  |
| 21  | 2,467.1 | 1,234.1 | 2,450.1 | 2,449.1 | E    | 1,046.5 | 523.8   | 1,029.5 | 1,028.5 | 9   |
| 22  | 2,596.2 | 1,298.6 | 2,579.1 | 2,578.1 | E    | 917.5   | 459.3   | 900.5   | 899.5   | 8   |
| 23  | 2,667.2 | 1,334.1 | 2,650.2 | 2,649.2 | A    | 788.5   | 394.7   | 771.4   | 770.4   | 7   |
| 24  | 2,795.3 | 1,398.1 | 2,778.3 | 2,777.3 | K    | 717.4   | 359.2   | 700.4   | 699.4   | 6   |
| 25  | 2,924.3 | 1,462.7 | 2,907.3 | 2,906.3 | E    | 589.3   |         | 572.3   | 571.3   | 5   |
| 26  | 3,053.4 | 1,527.2 | 3,036.3 | 3,035.4 | E    | 460.3   |         | 443.3   | 442.3   | 4   |
| 27  | 3,166.5 | 1,583.7 | 3,149.4 | 3,148.4 | L    | 331.2   |         | 314.2   |         | 3   |
| 28  | 3,237.5 | 1,619.2 | 3,220.5 | 3,219.5 | A    | 218.1   |         | 201.1   |         | 2   |
| 29  | 3,383.6 | 1,692.3 | 3,366.6 | 3,365.6 | K    | 147.1   |         | 130.1   |         | 1   |

# Whole proteome

| Protein No. | Leading protein name | Sequence     | Mascot Score | Variable Modifications  | SILAC State | Charge | m/z       |
|-------------|----------------------|--------------|--------------|-------------------------|-------------|--------|-----------|
| W-36        | sp Q6DKJ4 INXN_HUMAN | SGFLEELLGKEK | 79.49        | Acetyl (Protein N-term) | Light       | 2      | 632.32699 |

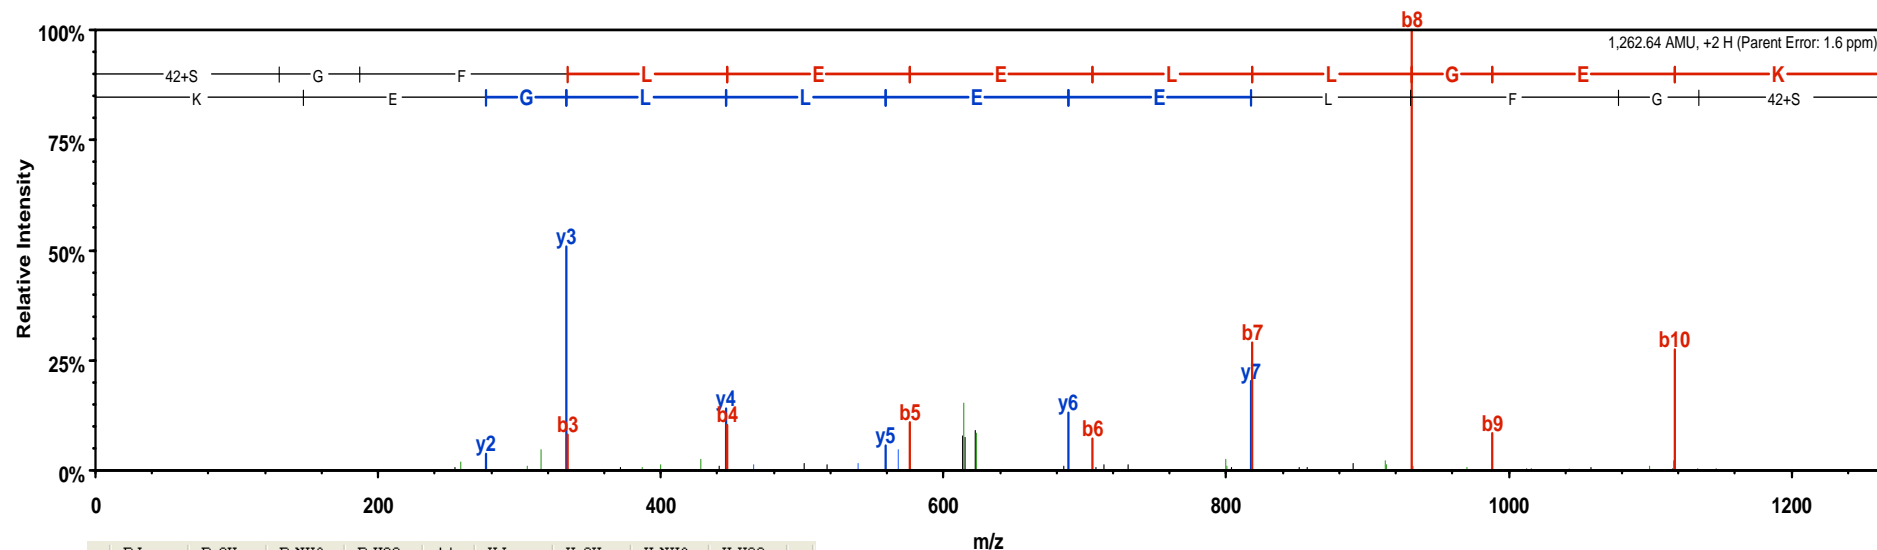

| ... | B Ions  | B+2H  | B-NH3   | B-H2O   | AA   | Y Ions  | Y+2H  | Y-NH3   | Y-H2O   | ... |
|-----|---------|-------|---------|---------|------|---------|-------|---------|---------|-----|
| 1   | 130.0   |       |         | 112.0   | S+42 | 1,263.6 | 632.3 | 1,246.6 | 1,245.6 | 11  |
| 2   | 187.1   |       |         | 169.1   | G    | 1,134.6 | 567.8 | 1,117.6 | 1,116.6 | 10  |
| 3   | 334.1   |       |         | 316.1   | F    | 1,077.6 | 539.3 | 1,060.6 | 1,059.6 | 9   |
| 4   | 447.2   |       |         | 429.2   | L    | 930.5   | 465.8 | 913.5   | 912.5   | 8   |
| 5   | 576.3   |       |         | 558.3   | E    | 817.4   | 409.2 | 800.4   | 799.4   | 7   |
| 6   | 705.3   | 353.2 |         | 687.3   | E    | 688.4   | 344.7 | 671.4   | 670.4   | 6   |
| 7   | 818.4   | 409.7 |         | 800.4   | L    | 559.3   |       | 542.3   | 541.3   | 5   |
| 8   | 931.5   | 466.2 |         | 913.5   | L    | 446.3   |       | 429.2   | 428.3   | 4   |
| 9   | 988.5   | 494.8 |         | 970.5   | G    | 333.2   |       | 316.2   | 315.2   | 3   |
| 10  | 1,117.5 | 559.3 |         | 1,099.5 | E    | 276.2   |       | 259.1   | 258.1   | 2   |
| 11  | 1,263.6 | 632.3 | 1,246.6 | 1,245.6 | K    | 147.1   |       | 130.1   |         | 1   |

# Whole proteome

| Protein No. | Leading protein name  | Sequence         | Mascot Score | Variable Modifications | SILAC State | Charge | m/z       |
|-------------|-----------------------|------------------|--------------|------------------------|-------------|--------|-----------|
| W-44        | sp Q53EL6 PDCD4_HUMAN | EYLLSGDISEAEHCLK | 79.31        | Unmodified             | Heavy       | 2      | 932.44329 |

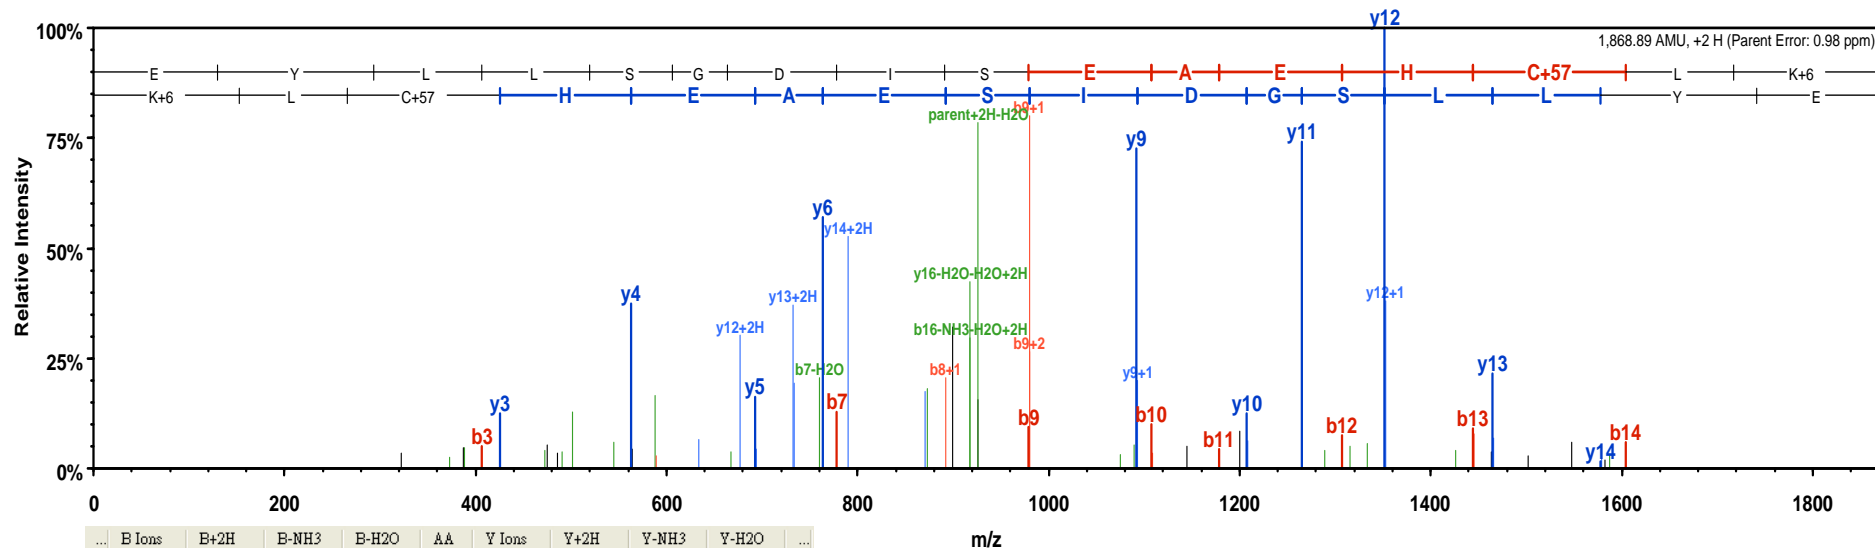

| ... | B Ions  | B+2H  | B-NH3   | B-H2O   | AA   | Y Ions  | Y+2H  | Y-NH3   | Y-H2O   | ... |
|-----|---------|-------|---------|---------|------|---------|-------|---------|---------|-----|
| 1   | 130.0   |       |         | 112.0   | E    | 1,869.9 | 935.5 | 1,852.9 | 1,851.9 | 16  |
| 2   | 293.1   |       |         | 275.1   | Y    | 1,740.9 | 870.9 | 1,723.8 | 1,722.8 | 15  |
| 3   | 406.2   |       |         | 388.2   | L    | 1,577.8 | 789.4 | 1,560.8 | 1,559.8 | 14  |
| 4   | 519.3   |       |         | 501.3   | L    | 1,464.7 | 732.9 | 1,447.7 | 1,446.7 | 13  |
| 5   | 606.3   |       |         | 588.3   | S    | 1,351.6 | 676.3 | 1,334.6 | 1,333.6 | 12  |
| 6   | 663.3   | 332.2 |         | 645.3   | G    | 1,264.6 | 632.8 | 1,247.6 | 1,246.6 | 11  |
| 7   | 778.4   | 389.7 |         | 760.4   | D    | 1,207.6 | 604.3 | 1,190.5 | 1,189.6 | 10  |
| 8   | 891.4   | 446.2 |         | 873.4   | I    | 1,092.5 | 546.8 | 1,075.5 | 1,074.5 | 9   |
| 9   | 978.5   | 489.7 |         | 960.5   | S    | 979.5   | 490.2 | 962.4   | 961.5   | 8   |
| 10  | 1,107.5 | 554.3 |         | 1,089.5 | E    | 892.4   | 446.7 | 875.4   | 874.4   | 7   |
| 11  | 1,178.6 | 589.8 |         | 1,160.5 | A    | 763.4   | 382.2 | 746.4   | 745.4   | 6   |
| 12  | 1,307.6 | 654.3 |         | 1,289.6 | E    | 692.3   | 346.7 | 675.3   | 674.3   | 5   |
| 13  | 1,444.7 | 722.8 |         | 1,426.6 | H    | 563.3   | 282.2 | 546.3   |         | 4   |
| 14  | 1,604.7 | 802.8 |         | 1,586.7 | C+57 | 426.2   |       | 409.2   |         | 3   |
| 15  | 1,717.8 | 859.4 |         | 1,699.8 | L    | 266.2   |       | 249.2   |         | 2   |
| 16  | 1,869.9 | 935.5 | 1,852.9 | 1,851.9 | K+6  | 153.1   |       | 136.1   |         | 1   |

# Whole proteome

| Protein No. | Leading protein name | Sequence             | Mascot Score | Variable Modifications   | SILAC State | Charge | m/z       |
|-------------|----------------------|----------------------|--------------|--------------------------|-------------|--------|-----------|
| W-45        | splO43768IENSA_HUMAN | QEEENPAEETGEEKQDTQEK | 79.2         | Gln->pyro-Glu (N-term Q) | Heavy       | 2      | 1165.9908 |

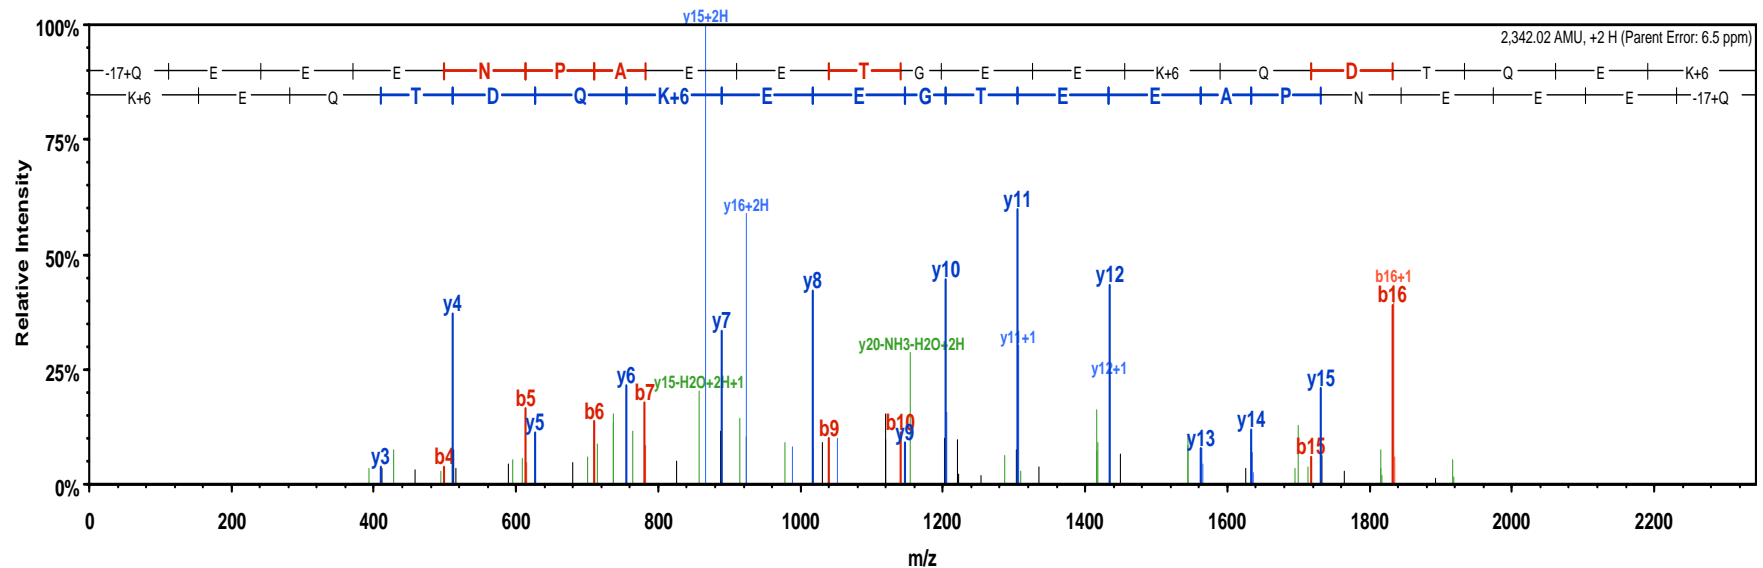

| ... | B Ions  | B+2H    | B-NH3   | B-H2O   | AA   | Y Ions  | Y+2H    | Y-NH3   | Y-H2O   | ... |
|-----|---------|---------|---------|---------|------|---------|---------|---------|---------|-----|
| 1   | 112.0   |         | 95.0    |         | Q-17 | 2,343.0 | 1,172.0 | 2,326.0 | 2,325.0 | 20  |
| 2   | 241.1   |         | 224.1   | 223.1   | E    | 2,232.0 | 1,116.5 | 2,215.0 | 2,214.0 | 19  |
| 3   | 370.1   |         | 353.1   | 352.1   | E    | 2,102.9 | 1,052.0 | 2,085.9 | 2,084.9 | 18  |
| 4   | 499.2   |         | 482.1   | 481.2   | E    | 1,973.9 | 987.5   | 1,956.9 | 1,955.9 | 17  |
| 5   | 613.2   |         | 596.2   | 595.2   | N    | 1,844.9 | 922.9   | 1,827.8 | 1,826.8 | 16  |
| 6   | 710.3   | 355.6   | 693.2   | 692.3   | P    | 1,730.8 | 865.9   | 1,713.8 | 1,712.8 | 15  |
| 7   | 781.3   | 391.2   | 764.3   | 763.3   | A    | 1,633.8 | 817.4   | 1,616.7 | 1,615.7 | 14  |
| 8   | 910.3   | 455.7   | 893.3   | 892.3   | E    | 1,562.7 | 781.9   | 1,545.7 | 1,544.7 | 13  |
| 9   | 1,039.4 | 520.2   | 1,022.4 | 1,021.4 | E    | 1,433.7 | 717.3   | 1,416.7 | 1,415.7 | 12  |
| 10  | 1,140.4 | 570.7   | 1,123.4 | 1,122.4 | T    | 1,304.6 | 652.8   | 1,287.6 | 1,286.6 | 11  |
| 11  | 1,197.5 | 599.2   | 1,180.4 | 1,179.4 | G    | 1,203.6 | 602.3   | 1,186.6 | 1,185.6 | 10  |
| 12  | 1,326.5 | 663.8   | 1,309.5 | 1,308.5 | E    | 1,146.6 | 573.8   | 1,129.5 | 1,128.6 | 9   |
| 13  | 1,455.5 | 728.3   | 1,438.5 | 1,437.5 | E    | 1,017.5 | 509.3   | 1,000.5 | 999.5   | 8   |
| 14  | 1,589.7 | 795.3   | 1,572.6 | 1,571.6 | K+6  | 888.5   | 444.7   | 871.5   | 870.5   | 7   |
| 15  | 1,717.7 | 859.4   | 1,700.7 | 1,699.7 | Q    | 754.4   | 377.7   | 737.3   | 736.4   | 6   |
| 16  | 1,832.7 | 916.9   | 1,815.7 | 1,814.7 | D    | 626.3   |         | 609.3   | 608.3   | 5   |
| 17  | 1,933.8 | 967.4   | 1,916.8 | 1,915.8 | T    | 511.3   |         | 494.3   | 493.3   | 4   |
| 18  | 2,061.8 | 1,031.4 | 2,044.8 | 2,043.8 | Q    | 410.2   |         | 393.2   | 392.2   | 3   |
| 19  | 2,190.9 | 1,095.9 | 2,173.9 | 2,172.9 | E    | 282.2   |         | 265.1   | 264.2   | 2   |
| 20  | 2,343.0 | 1,172.0 | 2,326.0 | 2,325.0 | K+6  | 153.1   |         | 136.1   |         | 1   |

# Whole proteome

| Protein No. | Leading protein name | Sequence         | Mascot Score | Variable Modifications | SILAC State | Charge | m/z       |
|-------------|----------------------|------------------|--------------|------------------------|-------------|--------|-----------|
| W-46        | splQ01628IIFM3_HUMAN | MVGDVTGAQAYASTAK | 78.22        | Oxidation (M)          | Heavy       | 2      | 793.37996 |

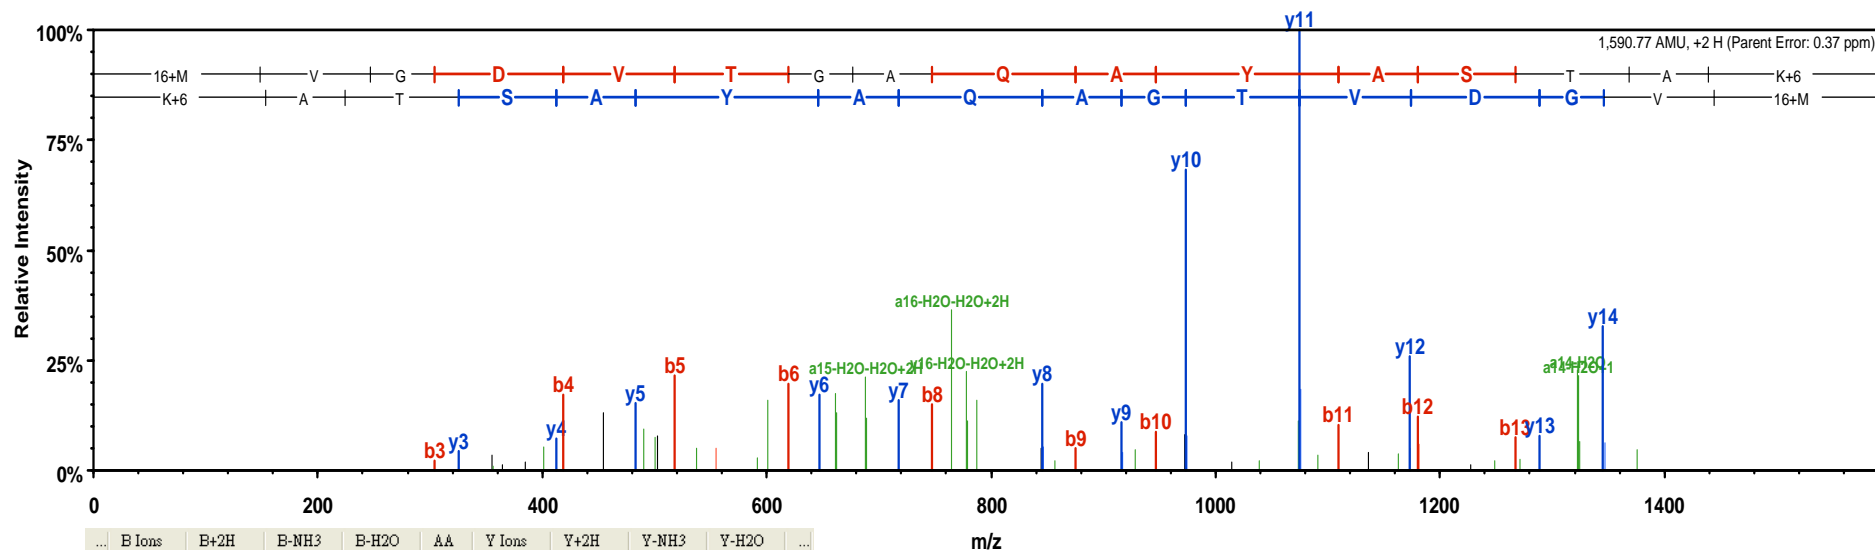

| ... | B Ions  | B+2H  | B-NH3   | B-H2O   | AA   | Y Ions  | Y+2H  | Y-NH3   | Y-H2O   | ... |
|-----|---------|-------|---------|---------|------|---------|-------|---------|---------|-----|
| 1   | 148.0   |       |         |         | M+16 | 1,591.8 | 796.4 | 1,574.7 | 1,573.8 | 16  |
| 2   | 247.1   |       |         |         | V    | 1,444.7 | 722.9 | 1,427.7 | 1,426.7 | 15  |
| 3   | 304.1   |       |         |         | G    | 1,345.7 | 673.3 | 1,328.6 | 1,327.7 | 14  |
| 4   | 419.2   |       |         | 401.1   | D    | 1,288.6 | 644.8 | 1,271.6 | 1,270.6 | 13  |
| 5   | 518.2   |       |         | 500.2   | V    | 1,173.6 | 587.3 | 1,156.6 | 1,155.6 | 12  |
| 6   | 619.3   | 310.1 |         | 601.3   | T    | 1,074.6 | 537.8 | 1,057.5 | 1,056.5 | 11  |
| 7   | 676.3   | 338.7 |         | 658.3   | G    | 973.5   | 487.3 | 956.5   | 955.5   | 10  |
| 8   | 747.3   | 374.2 |         | 729.3   | A    | 916.5   | 458.7 | 899.5   | 898.5   | 9   |
| 9   | 875.4   | 438.2 | 858.4   | 857.4   | Q    | 845.4   | 423.2 | 828.4   | 827.4   | 8   |
| 10  | 946.4   | 473.7 | 929.4   | 928.4   | A    | 717.4   | 359.2 | 700.4   | 699.4   | 7   |
| 11  | 1,109.5 | 555.3 | 1,092.5 | 1,091.5 | V    | 646.4   | 323.7 | 629.3   | 628.3   | 6   |
| 12  | 1,180.5 | 590.8 | 1,163.5 | 1,162.5 | A    | 483.3   |       | 466.3   | 465.3   | 5   |
| 13  | 1,267.6 | 634.3 | 1,250.5 | 1,249.6 | S    | 412.2   |       | 395.2   | 394.2   | 4   |
| 14  | 1,368.6 | 684.8 | 1,351.6 | 1,350.6 | T    | 325.2   |       | 308.2   | 307.2   | 3   |
| 15  | 1,439.6 | 720.3 | 1,422.6 | 1,421.6 | A    | 224.2   |       | 207.1   |         | 2   |
| 16  | 1,591.8 | 796.4 | 1,574.7 | 1,573.8 | K+6  | 153.1   |       | 136.1   |         | 1   |

# Whole proteome

| Protein No. | Leading protein name | Sequence            | Mascot Score | Variable Modifications  | SILAC State | Charge | m/z       |
|-------------|----------------------|---------------------|--------------|-------------------------|-------------|--------|-----------|
| W-47        | sp Q9Y4Y9 LSM5_HUMAN | AANATTNPSQLLPLELVDK | 77.77        | Acetyl (Protein N-term) | Light       | 2      | 1019.0468 |

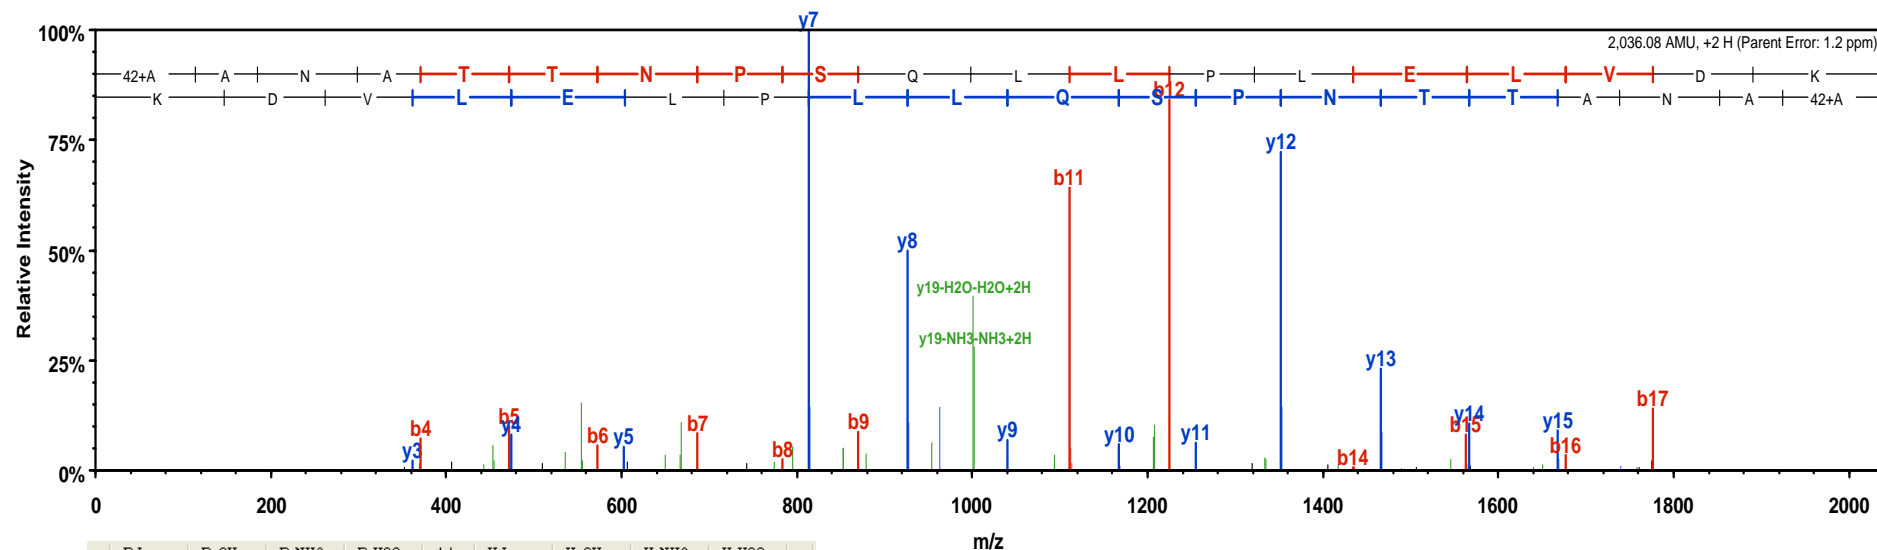

| ... | B Ions  | B+2H    | B-NH3   | B-H2O   | AA   | Y Ions  | Y+2H    | Y-NH3   | Y-H2O   | ... |
|-----|---------|---------|---------|---------|------|---------|---------|---------|---------|-----|
| 1   | 114.1   |         |         |         | A+42 | 2,037.1 | 1,019.0 | 2,020.1 | 2,019.1 | 19  |
| 2   | 185.1   |         |         |         | A    | 1,924.0 | 962.5   | 1,907.0 | 1,906.0 | 18  |
| 3   | 299.1   |         | 282.1   |         | N    | 1,853.0 | 927.0   | 1,836.0 | 1,835.0 | 17  |
| 4   | 370.2   |         | 353.1   |         | A    | 1,739.0 | 870.0   | 1,721.9 | 1,720.9 | 16  |
| 5   | 471.2   |         | 454.2   | 453.2   | T    | 1,667.9 | 834.5   | 1,650.9 | 1,649.9 | 15  |
| 6   | 572.3   | 286.6   | 555.2   | 554.3   | T    | 1,566.9 | 783.9   | 1,549.8 | 1,548.9 | 14  |
| 7   | 686.3   | 343.7   | 669.3   | 668.3   | N    | 1,465.8 | 733.4   | 1,448.8 | 1,447.8 | 13  |
| 8   | 783.4   | 392.2   | 766.3   | 765.4   | P    | 1,351.8 | 676.4   | 1,334.8 | 1,333.8 | 12  |
| 9   | 870.4   | 435.7   | 853.4   | 852.4   | S    | 1,254.7 | 627.9   | 1,237.7 | 1,236.7 | 11  |
| 10  | 998.5   | 499.7   | 981.4   | 980.4   | Q    | 1,167.7 | 584.4   | 1,150.7 | 1,149.7 | 10  |
| 11  | 1,111.5 | 556.3   | 1,094.5 | 1,093.5 | L    | 1,039.6 | 520.3   | 1,022.6 | 1,021.6 | 9   |
| 12  | 1,224.6 | 612.8   | 1,207.6 | 1,206.6 | L    | 926.6   | 463.8   | 909.5   | 908.5   | 8   |
| 13  | 1,321.7 | 661.3   | 1,304.6 | 1,303.7 | P    | 813.5   | 407.2   | 796.4   | 795.5   | 7   |
| 14  | 1,434.8 | 717.9   | 1,417.7 | 1,416.7 | L    | 716.4   | 358.7   | 699.4   | 698.4   | 6   |
| 15  | 1,563.8 | 782.4   | 1,546.8 | 1,545.8 | E    | 603.3   |         | 586.3   | 585.3   | 5   |
| 16  | 1,676.9 | 838.9   | 1,659.9 | 1,658.9 | L    | 474.3   |         | 457.3   | 456.3   | 4   |
| 17  | 1,776.0 | 888.5   | 1,758.9 | 1,757.9 | V    | 361.2   |         | 344.2   | 343.2   | 3   |
| 18  | 1,891.0 | 946.0   | 1,874.0 | 1,873.0 | D    | 262.1   |         | 245.1   | 244.1   | 2   |
| 19  | 2,037.1 | 1,019.0 | 2,020.1 | 2,019.1 | K    | 147.1   |         | 130.1   |         | 1   |



# Whole proteome

| Protein No. | Leading protein name  | Sequence     | Mascot Score | Variable Modifications | SILAC State | Charge | m/z       |
|-------------|-----------------------|--------------|--------------|------------------------|-------------|--------|-----------|
| W-48        | sp P61009 SPCS3_HUMAN | NNALNQVVLWDK | 77.11        | Unmodified             | Light       | 2      | 707.37788 |

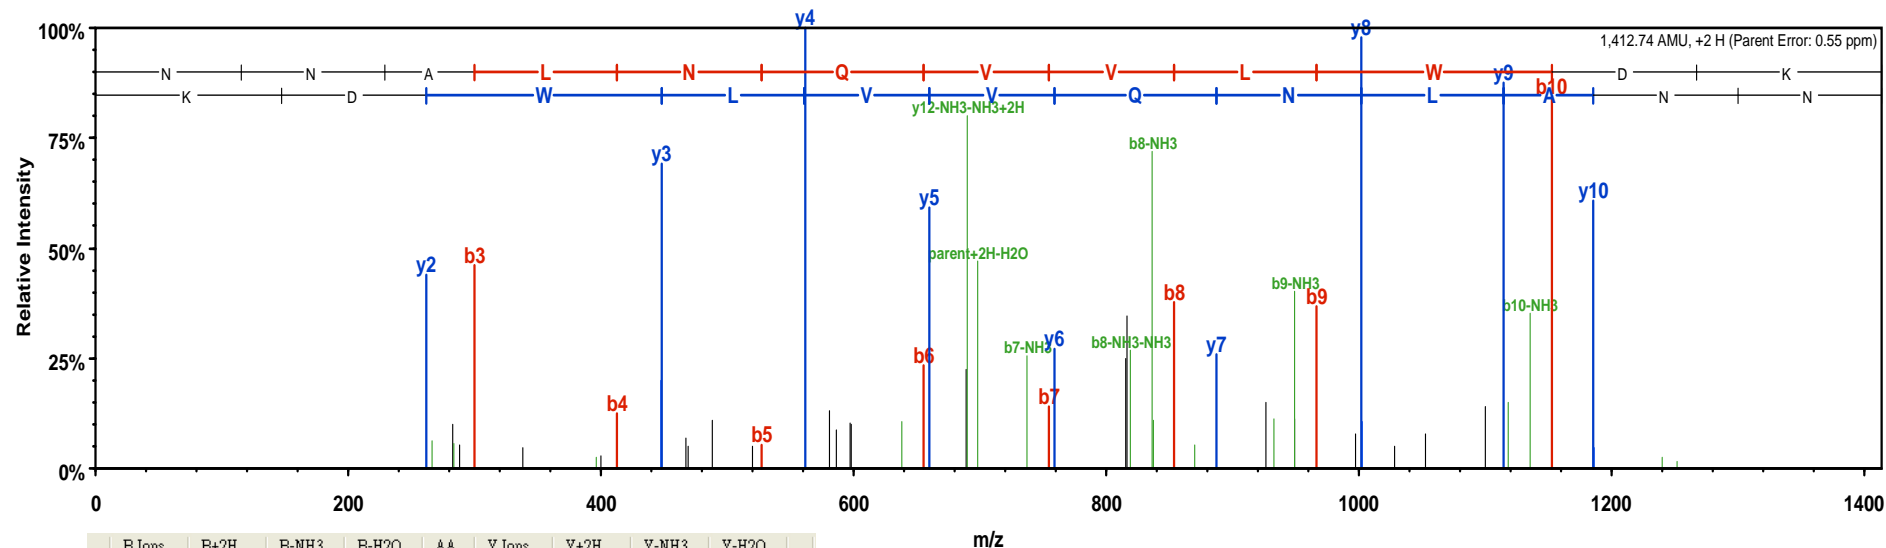

| ... | B Ions  | B+2H  | B-NH3   | B-H2O   | AA | Y Ions  | Y+2H  | Y-NH3   | Y-H2O   | ... |
|-----|---------|-------|---------|---------|----|---------|-------|---------|---------|-----|
| 1   | 115.1   |       | 98.0    |         | N  | 1,413.7 | 707.4 | 1,396.7 | 1,395.7 | 12  |
| 2   | 229.1   |       | 212.1   |         | N  | 1,299.7 | 650.4 | 1,282.7 | 1,281.7 | 11  |
| 3   | 300.1   |       | 283.1   |         | A  | 1,185.7 | 593.3 | 1,168.6 | 1,167.7 | 10  |
| 4   | 413.2   |       | 396.2   |         | L  | 1,114.6 | 557.8 | 1,097.6 | 1,096.6 | 9   |
| 5   | 527.3   |       | 510.2   |         | N  | 1,001.5 | 501.3 | 984.5   | 983.5   | 8   |
| 6   | 655.3   | 328.2 | 638.3   |         | Q  | 887.5   | 444.3 | 870.5   | 869.5   | 7   |
| 7   | 754.4   | 377.7 | 737.4   |         | V  | 759.4   | 380.2 | 742.4   | 741.4   | 6   |
| 8   | 853.5   | 427.2 | 836.4   |         | V  | 660.4   |       | 643.3   | 642.4   | 5   |
| 9   | 966.5   | 483.8 | 949.5   |         | L  | 561.3   |       | 544.3   | 543.3   | 4   |
| 10  | 1,152.6 | 576.8 | 1,135.6 |         | W  | 448.2   |       | 431.2   | 430.2   | 3   |
| 11  | 1,267.6 | 634.3 | 1,250.6 | 1,249.6 | D  | 262.1   |       | 245.1   | 244.1   | 2   |
| 12  | 1,413.7 | 707.4 | 1,396.7 | 1,395.7 | K  | 147.1   |       | 130.1   |         | 1   |

# Whole proteome

| Protein No. | Leading protein name   | Sequence          | Mascot Score | Variable Modifications | SILAC State | Charge | m/z       |
|-------------|------------------------|-------------------|--------------|------------------------|-------------|--------|-----------|
| W-49        | sp Q9ULI2 IRIMKB_HUMAN | LPGGLFNMNQLLANEIK | 74.86        | Unmodified             | Light       | 2      | 936.50603 |

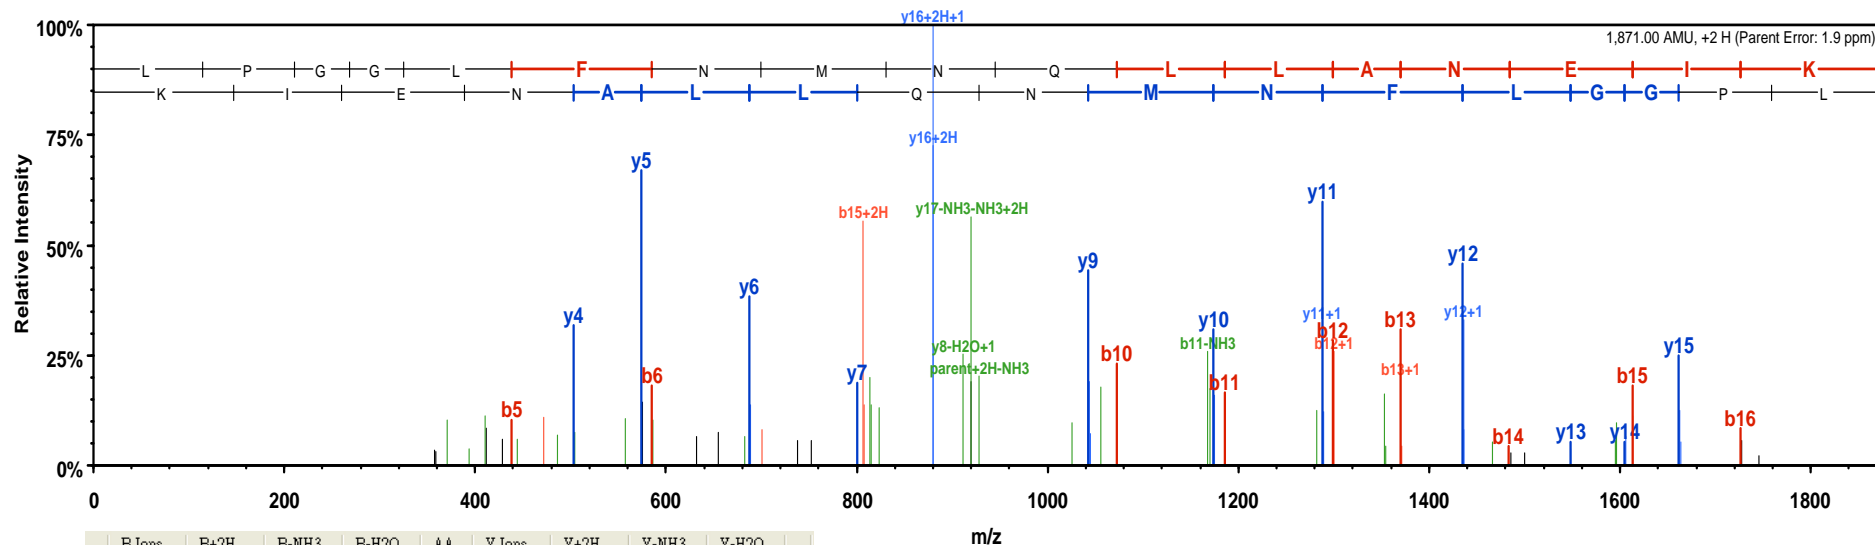

| ... | E Ions  | B+2H  | B-NH3   | B-H2O   | AA | Y Ions  | Y+2H  | Y-NH3   | Y-H2O   | ... |
|-----|---------|-------|---------|---------|----|---------|-------|---------|---------|-----|
| 1   | 114.1   |       |         |         | L  | 1,872.0 | 936.5 | 1,855.0 | 1,854.0 | 17  |
| 2   | 211.1   |       |         |         | P  | 1,758.9 | 880.0 | 1,741.9 | 1,740.9 | 16  |
| 3   | 268.2   |       |         |         | G  | 1,661.9 | 831.4 | 1,644.8 | 1,643.9 | 15  |
| 4   | 325.2   |       |         |         | G  | 1,604.8 | 802.9 | 1,587.8 | 1,586.8 | 14  |
| 5   | 438.3   |       |         |         | L  | 1,547.8 | 774.4 | 1,530.8 | 1,529.8 | 13  |
| 6   | 585.3   | 293.2 |         |         | F  | 1,434.7 | 717.9 | 1,417.7 | 1,416.7 | 12  |
| 7   | 699.4   | 350.2 | 682.4   |         | N  | 1,287.7 | 644.3 | 1,270.6 | 1,269.7 | 11  |
| 8   | 830.4   | 415.7 | 813.4   |         | M  | 1,173.6 | 587.3 | 1,156.6 | 1,155.6 | 10  |
| 9   | 944.5   | 472.7 | 927.4   |         | N  | 1,042.6 | 521.8 | 1,025.6 | 1,024.6 | 9   |
| 10  | 1,072.5 | 536.8 | 1,055.5 |         | Q  | 928.5   | 464.8 | 911.5   | 910.5   | 8   |
| 11  | 1,185.6 | 593.3 | 1,168.6 |         | L  | 800.5   | 400.7 | 783.5   | 782.5   | 7   |
| 12  | 1,298.7 | 649.9 | 1,281.7 |         | L  | 687.4   | 344.2 | 670.4   | 669.4   | 6   |
| 13  | 1,369.7 | 685.4 | 1,352.7 |         | A  | 574.3   |       | 557.3   | 556.3   | 5   |
| 14  | 1,483.8 | 742.4 | 1,466.7 |         | N  | 503.3   |       | 486.3   | 485.3   | 4   |
| 15  | 1,612.8 | 806.9 | 1,595.8 | 1,594.8 | E  | 389.2   |       | 372.2   | 371.2   | 3   |
| 16  | 1,725.9 | 863.5 | 1,708.9 | 1,707.9 | I  | 260.2   |       | 243.2   |         | 2   |
| 17  | 1,872.0 | 936.5 | 1,855.0 | 1,854.0 | K  | 147.1   |       | 130.1   |         | 1   |

# Whole proteome

| Protein No. | Leading protein name | Sequence              | Mascot Score | Variable Modifications | SILAC State | Charge | m/z      |
|-------------|----------------------|-----------------------|--------------|------------------------|-------------|--------|----------|
| W-50        | splQ15059IBRD3_HUMAN | DSNPDEIEIDFETLKP TTLR | 74.58        | Unmodified             | Heavy       | 2      | 1167.079 |

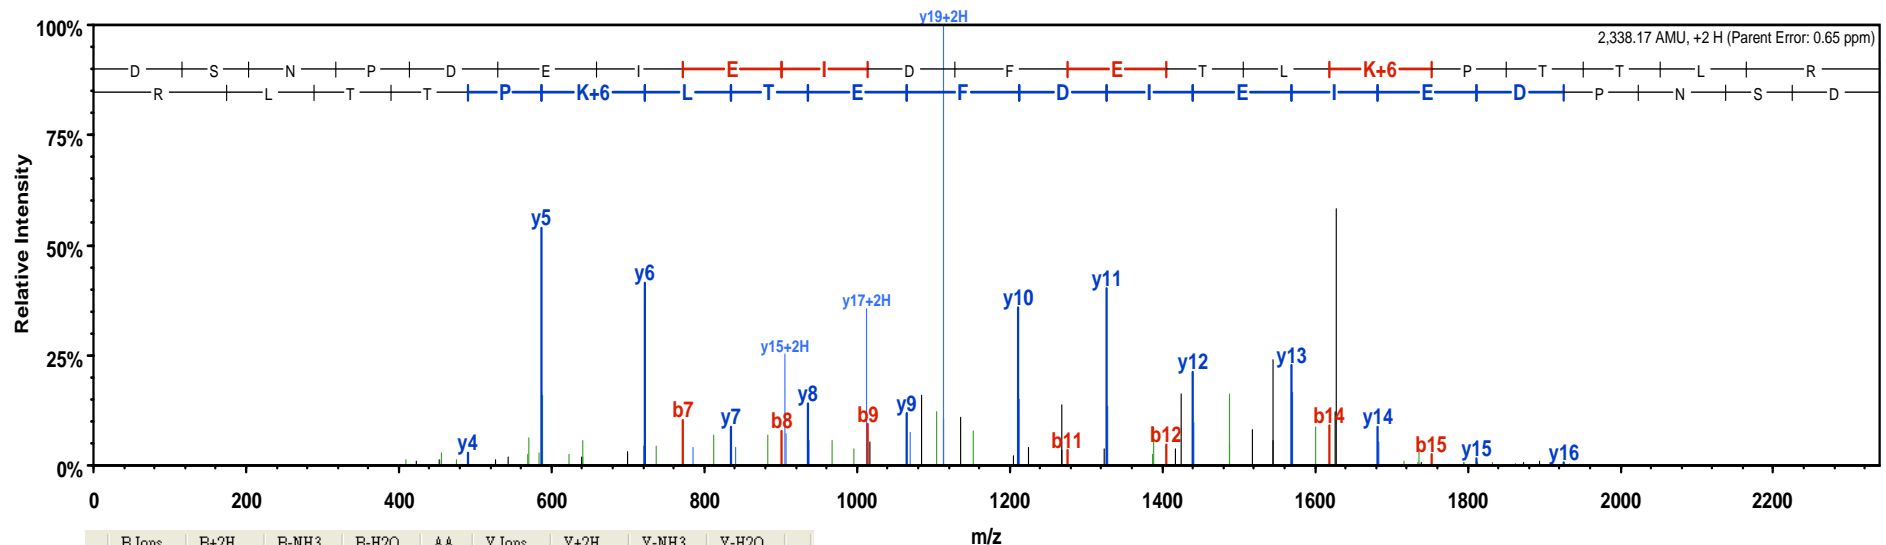

| ... | B Ions  | B+2H    | B-NH3   | B-H2O   | AA  | Y Ions  | Y+2H    | Y-NH3   | Y-H2O   | ... |
|-----|---------|---------|---------|---------|-----|---------|---------|---------|---------|-----|
| 1   | 116.0   |         |         | 98.0    | D   | 2,339.2 | 1,170.1 | 2,322.1 | 2,321.2 | 20  |
| 2   | 203.1   |         |         | 185.1   | S   | 2,224.1 | 1,112.6 | 2,207.1 | 2,206.1 | 19  |
| 3   | 317.1   |         | 300.1   | 299.1   | N   | 2,137.1 | 1,069.1 | 2,120.1 | 2,119.1 | 18  |
| 4   | 414.2   |         | 397.1   | 396.2   | P   | 2,023.1 | 1,012.0 | 2,006.0 | 2,005.1 | 17  |
| 5   | 529.2   |         | 512.2   | 511.2   | D   | 1,926.0 | 963.5   | 1,909.0 | 1,908.0 | 16  |
| 6   | 658.2   | 329.6   | 641.2   | 640.2   | E   | 1,811.0 | 906.0   | 1,794.0 | 1,793.0 | 15  |
| 7   | 771.3   | 386.2   | 754.3   | 753.3   | I   | 1,681.9 | 841.5   | 1,664.9 | 1,663.9 | 14  |
| 8   | 900.4   | 450.7   | 883.3   | 882.3   | E   | 1,568.9 | 784.9   | 1,551.8 | 1,550.9 | 13  |
| 9   | 1,013.4 | 507.2   | 996.4   | 995.4   | I   | 1,439.8 | 720.4   | 1,422.8 | 1,421.8 | 12  |
| 10  | 1,128.5 | 564.7   | 1,111.4 | 1,110.5 | D   | 1,326.7 | 663.9   | 1,309.7 | 1,308.7 | 11  |
| 11  | 1,275.5 | 638.3   | 1,258.5 | 1,257.5 | F   | 1,211.7 | 606.4   | 1,194.7 | 1,193.7 | 10  |
| 12  | 1,404.6 | 702.8   | 1,387.6 | 1,386.6 | E   | 1,064.6 | 532.8   | 1,047.6 | 1,046.6 | 9   |
| 13  | 1,505.6 | 753.3   | 1,488.6 | 1,487.6 | T   | 935.6   | 468.3   | 918.6   | 917.6   | 8   |
| 14  | 1,618.7 | 809.9   | 1,601.7 | 1,600.7 | L   | 834.6   | 417.8   | 817.5   | 816.5   | 7   |
| 15  | 1,752.8 | 876.9   | 1,735.8 | 1,734.8 | K+6 | 721.5   | 361.2   | 704.4   | 703.5   | 6   |
| 16  | 1,849.9 | 925.4   | 1,832.9 | 1,831.9 | P   | 587.4   |         | 570.3   | 569.3   | 5   |
| 17  | 1,950.9 | 976.0   | 1,933.9 | 1,932.9 | T   | 490.3   |         | 473.3   | 472.3   | 4   |
| 18  | 2,052.0 | 1,026.5 | 2,034.9 | 2,034.0 | T   | 389.3   |         | 372.2   | 371.2   | 3   |
| 19  | 2,165.1 | 1,083.0 | 2,148.0 | 2,147.0 | L   | 288.2   |         | 271.2   |         | 2   |
| 20  | 2,339.2 | 1,170.1 | 2,322.1 | 2,321.2 | R   | 175.1   |         | 158.1   |         | 1   |

# Whole proteome

| Protein No. | Leading protein name  | Sequence     | Mascot Score | Variable Modifications | SILAC State | Charge | m/z       |
|-------------|-----------------------|--------------|--------------|------------------------|-------------|--------|-----------|
| W-51        | spIP55854ISUMO3_HUMAN | VAGQDGSVVQFK | 74.48        | Unmodified             | Light       | 2      | 617.82495 |

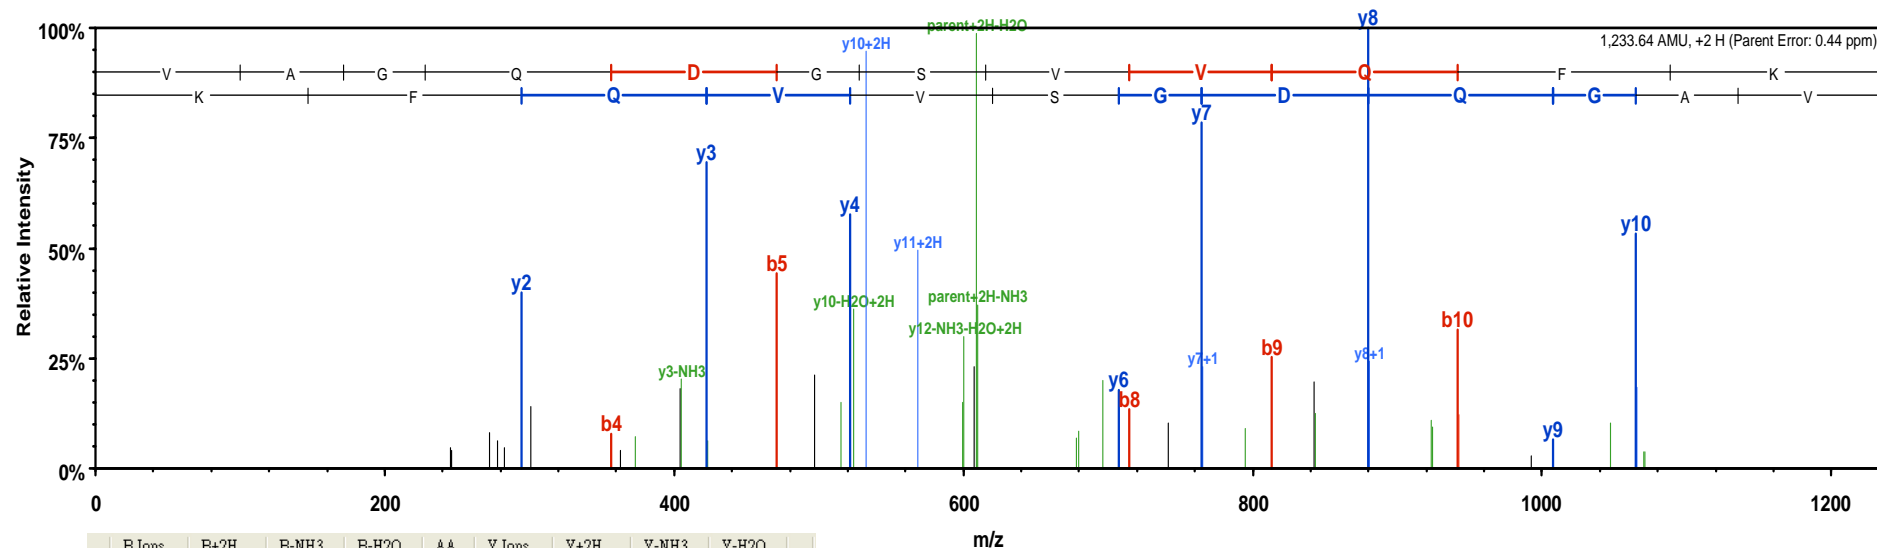

| ... | B Ions  | B+2H  | B-NH3   | B-H2O   | AA | Y Ions  | Y+2H  | Y-NH3   | Y-H2O   | ... |
|-----|---------|-------|---------|---------|----|---------|-------|---------|---------|-----|
| 1   | 100.1   |       |         |         | V  | 1,234.6 | 617.8 | 1,217.6 | 1,216.6 | 12  |
| 2   | 171.1   |       |         |         | A  | 1,135.6 | 568.3 | 1,118.5 | 1,117.6 | 11  |
| 3   | 228.1   |       |         |         | G  | 1,064.5 | 532.8 | 1,047.5 | 1,046.5 | 10  |
| 4   | 356.2   |       | 339.2   |         | Q  | 1,007.5 | 504.3 | 990.5   | 989.5   | 9   |
| 5   | 471.2   |       | 454.2   | 453.2   | D  | 879.5   | 440.2 | 862.4   | 861.4   | 8   |
| 6   | 528.2   | 264.6 | 511.2   | 510.2   | G  | 764.4   | 382.7 | 747.4   | 746.4   | 7   |
| 7   | 615.3   | 308.1 | 598.2   | 597.3   | S  | 707.4   | 354.2 | 690.4   | 689.4   | 6   |
| 8   | 714.3   | 357.7 | 697.3   | 696.3   | V  | 620.4   |       | 603.4   |         | 5   |
| 9   | 813.4   | 407.2 | 796.4   | 795.4   | V  | 521.3   |       | 504.3   |         | 4   |
| 10  | 941.5   | 471.2 | 924.4   | 923.5   | Q  | 422.2   |       | 405.2   |         | 3   |
| 11  | 1,088.5 | 544.8 | 1,071.5 | 1,070.5 | F  | 294.2   |       | 277.2   |         | 2   |
| 12  | 1,234.6 | 617.8 | 1,217.6 | 1,216.6 | K  | 147.1   |       | 130.1   |         | 1   |

# Whole proteome

| Protein No. | Leading protein name  | Sequence       | Mascot Score | Variable Modifications | SILAC State | Charge | m/z       |
|-------------|-----------------------|----------------|--------------|------------------------|-------------|--------|-----------|
| W-52        | sp Q9HA64 IKT3K_HUMAN | LGAQLADLHLDNKK | 74.23        | Unmodified             | Light       | 2      | 768.43065 |

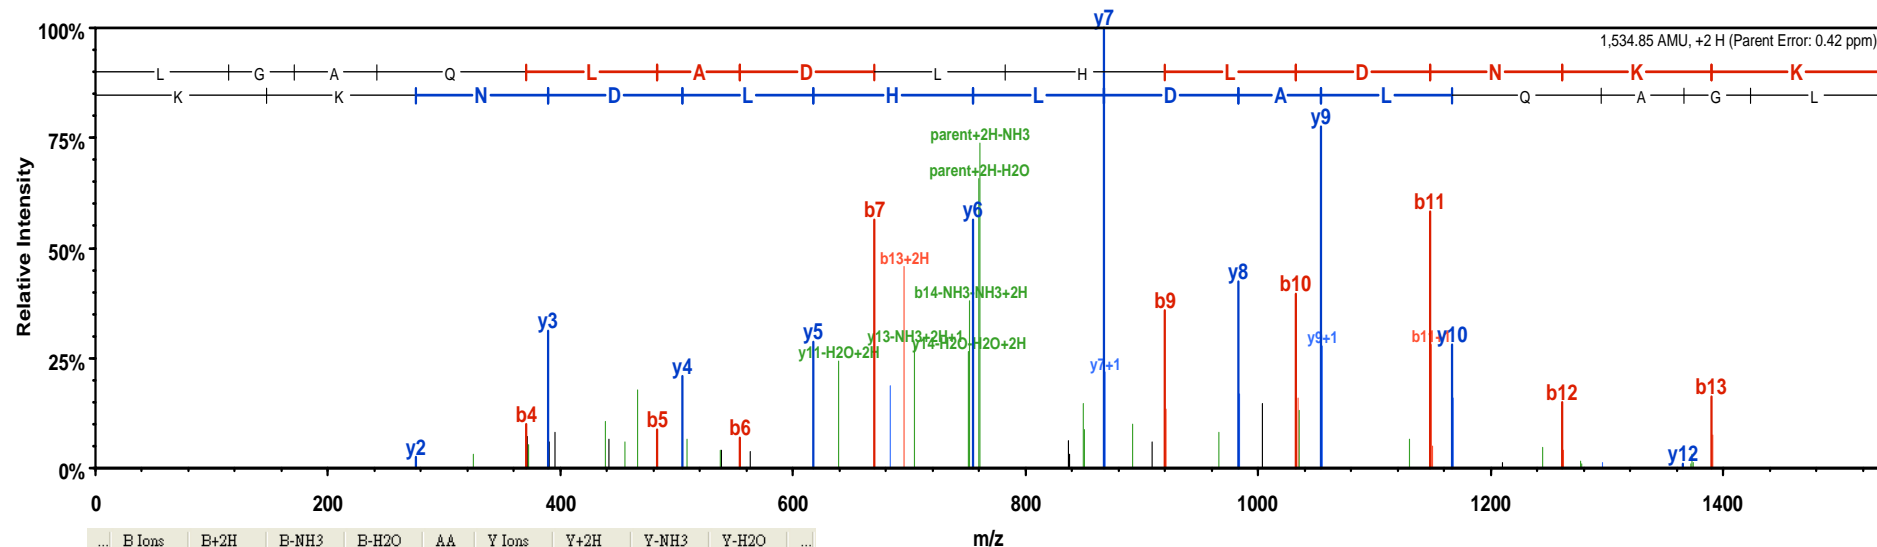

| ... | B Ions  | B+2H  | B-NH3   | B-H2O   | AA | Y Ions  | Y+2H  | Y-NH3   | Y-H2O   | ... |
|-----|---------|-------|---------|---------|----|---------|-------|---------|---------|-----|
| 1   | 114.1   |       |         |         | L  | 1,535.9 | 768.4 | 1,518.8 | 1,517.8 | 14  |
| 2   | 171.1   |       |         |         | G  | 1,422.8 | 711.9 | 1,405.7 | 1,404.8 | 13  |
| 3   | 242.1   |       |         |         | A  | 1,365.7 | 683.4 | 1,348.7 | 1,347.7 | 12  |
| 4   | 370.2   |       |         |         | Q  | 1,294.7 | 647.9 | 1,277.7 | 1,276.7 | 11  |
| 5   | 483.3   |       | 353.2   |         | L  | 1,166.7 | 583.8 | 1,149.6 | 1,148.6 | 10  |
| 6   | 554.3   | 277.7 | 466.3   |         | A  | 1,053.6 | 527.3 | 1,036.5 | 1,035.6 | 9   |
| 7   | 669.4   | 335.2 | 652.3   | 651.3   | D  | 982.5   | 491.8 | 965.5   | 964.5   | 8   |
| 8   | 782.4   | 391.7 | 765.4   | 764.4   | L  | 867.5   | 434.3 | 850.5   | 849.5   | 7   |
| 9   | 919.5   | 460.3 | 902.5   | 901.5   | H  | 754.4   | 377.7 | 737.4   | 736.4   | 6   |
| 10  | 1,032.6 | 516.8 | 1,015.6 | 1,014.6 | L  | 617.4   | 309.2 | 600.3   | 599.4   | 5   |
| 11  | 1,147.6 | 574.3 | 1,130.6 | 1,129.6 | D  | 504.3   | 252.6 | 487.3   | 486.3   | 4   |
| 12  | 1,261.7 | 631.3 | 1,244.6 | 1,243.6 | N  | 389.3   | 195.1 | 372.2   |         | 3   |
| 13  | 1,389.7 | 695.4 | 1,372.7 | 1,371.7 | K  | 275.2   | 138.1 | 258.2   |         | 2   |
| 14  | 1,535.9 | 768.4 | 1,518.8 | 1,517.8 | K  | 147.1   |       | 130.1   |         | 1   |

# Whole proteome

| Protein No. | Leading protein name  | Sequence              | Mascot Score | Variable Modifications | SILAC State | Charge | m/z     |
|-------------|-----------------------|-----------------------|--------------|------------------------|-------------|--------|---------|
| W-53        | splQ8NBN3ITM87A_HUMAN | YKGESVQGALILAELLSAVKR | 72.71        | Unmodified             | Light       | 3      | 749.102 |

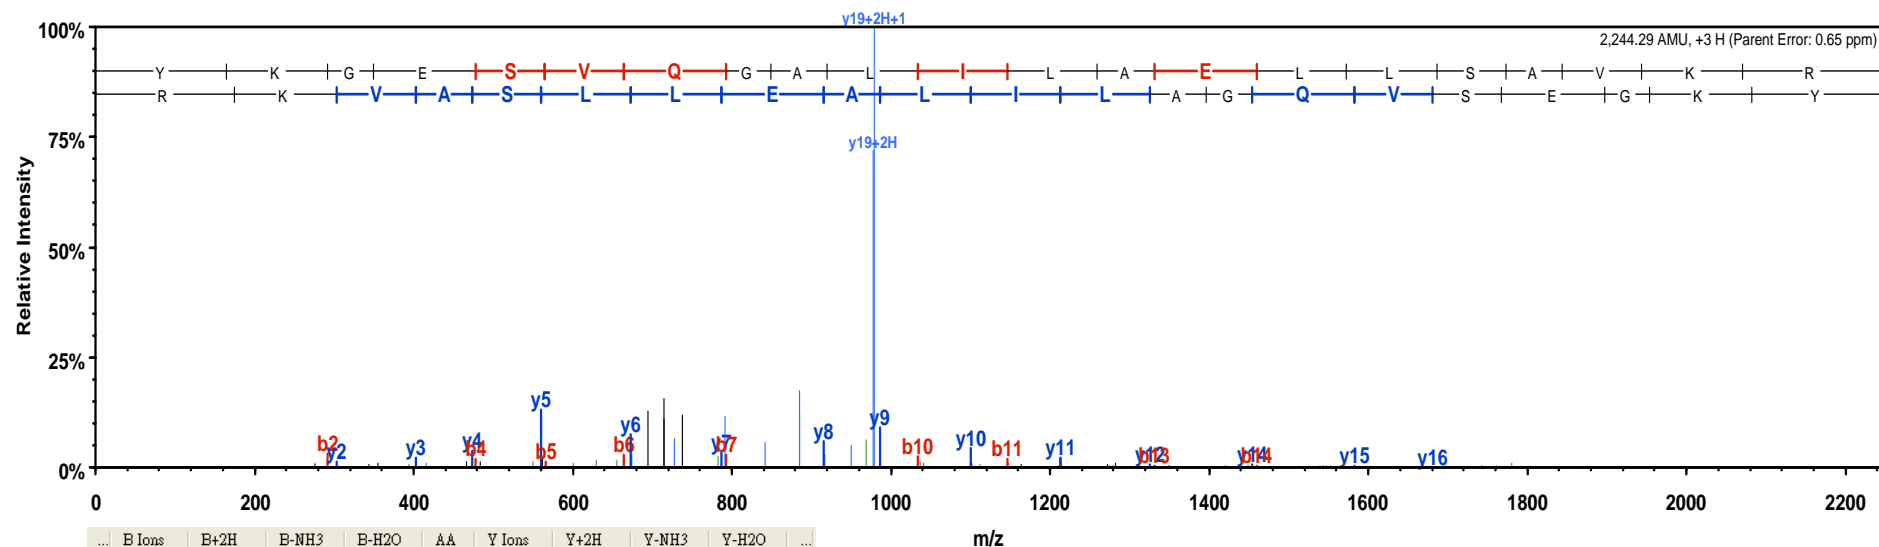

| ... | B Ions  | B+2H    | B-NH3   | B-H2O   | AA | Y Ions  | Y+2H    | Y-NH3   | Y-H2O   | ... |
|-----|---------|---------|---------|---------|----|---------|---------|---------|---------|-----|
| 1   | 164.1   |         |         |         | Y  | 2,245.3 | 1,123.1 | 2,228.3 | 2,227.3 | 21  |
| 2   | 292.2   | 146.6   | 275.1   |         | K  | 2,082.2 | 1,041.6 | 2,065.2 | 2,064.2 | 20  |
| 3   | 349.2   | 175.1   | 332.2   |         | G  | 1,954.1 | 977.6   | 1,937.1 | 1,936.1 | 19  |
| 4   | 478.2   | 239.6   | 461.2   | 460.2   | E  | 1,897.1 | 949.1   | 1,880.1 | 1,879.1 | 18  |
| 5   | 565.3   | 283.1   | 548.2   | 547.3   | S  | 1,768.1 | 884.5   | 1,751.0 | 1,750.1 | 17  |
| 6   | 664.3   | 332.7   | 647.3   | 646.3   | V  | 1,681.0 | 841.0   | 1,664.0 | 1,663.0 | 16  |
| 7   | 792.4   | 396.7   | 775.4   | 774.4   | Q  | 1,582.0 | 791.5   | 1,564.9 | 1,564.0 | 15  |
| 8   | 849.4   | 425.2   | 832.4   | 831.4   | G  | 1,453.9 | 727.5   | 1,436.9 | 1,435.9 | 14  |
| 9   | 920.4   | 460.7   | 903.4   | 902.4   | A  | 1,396.9 | 698.9   | 1,379.9 | 1,378.9 | 13  |
| 10  | 1,033.5 | 517.3   | 1,016.5 | 1,015.5 | L  | 1,325.9 | 663.4   | 1,308.8 | 1,307.8 | 12  |
| 11  | 1,146.6 | 573.8   | 1,129.6 | 1,128.6 | I  | 1,212.8 | 606.9   | 1,195.7 | 1,194.8 | 11  |
| 12  | 1,259.7 | 630.4   | 1,242.7 | 1,241.7 | L  | 1,099.7 | 550.3   | 1,082.7 | 1,081.7 | 10  |
| 13  | 1,330.7 | 665.9   | 1,313.7 | 1,312.7 | A  | 986.6   | 493.8   | 969.6   | 968.6   | 9   |
| 14  | 1,459.8 | 730.4   | 1,442.8 | 1,441.8 | E  | 915.6   | 458.3   | 898.5   | 897.6   | 8   |
| 15  | 1,572.9 | 786.9   | 1,555.8 | 1,554.9 | L  | 786.5   | 393.8   | 769.5   | 768.5   | 7   |
| 16  | 1,685.9 | 843.5   | 1,668.9 | 1,667.9 | L  | 673.4   | 337.2   | 656.4   | 655.4   | 6   |
| 17  | 1,773.0 | 887.0   | 1,756.0 | 1,755.0 | S  | 560.4   | 280.7   | 543.3   | 542.3   | 5   |
| 18  | 1,844.0 | 922.5   | 1,827.0 | 1,826.0 | A  | 473.3   | 237.2   | 456.3   |         | 4   |
| 19  | 1,943.1 | 972.0   | 1,926.1 | 1,925.1 | V  | 402.3   | 201.6   | 385.3   |         | 3   |
| 20  | 2,071.2 | 1,036.1 | 2,054.2 | 2,053.2 | K  | 303.2   | 152.1   | 286.2   |         | 2   |
| 21  | 2,245.3 | 1,123.1 | 2,228.3 | 2,227.3 | R  | 175.1   |         | 158.1   |         | 1   |

# Whole proteome

| Protein No. | Leading protein name  | Sequence              | Mascot Score | Variable Modifications | SILAC State | Charge | m/z       |
|-------------|-----------------------|-----------------------|--------------|------------------------|-------------|--------|-----------|
| W-54        | sp Q96NT0 CC115_HUMAN | AELDSLVLQLLGDLEELEGKR | 72.34        | Unmodified             | Light       | 3      | 780.76008 |

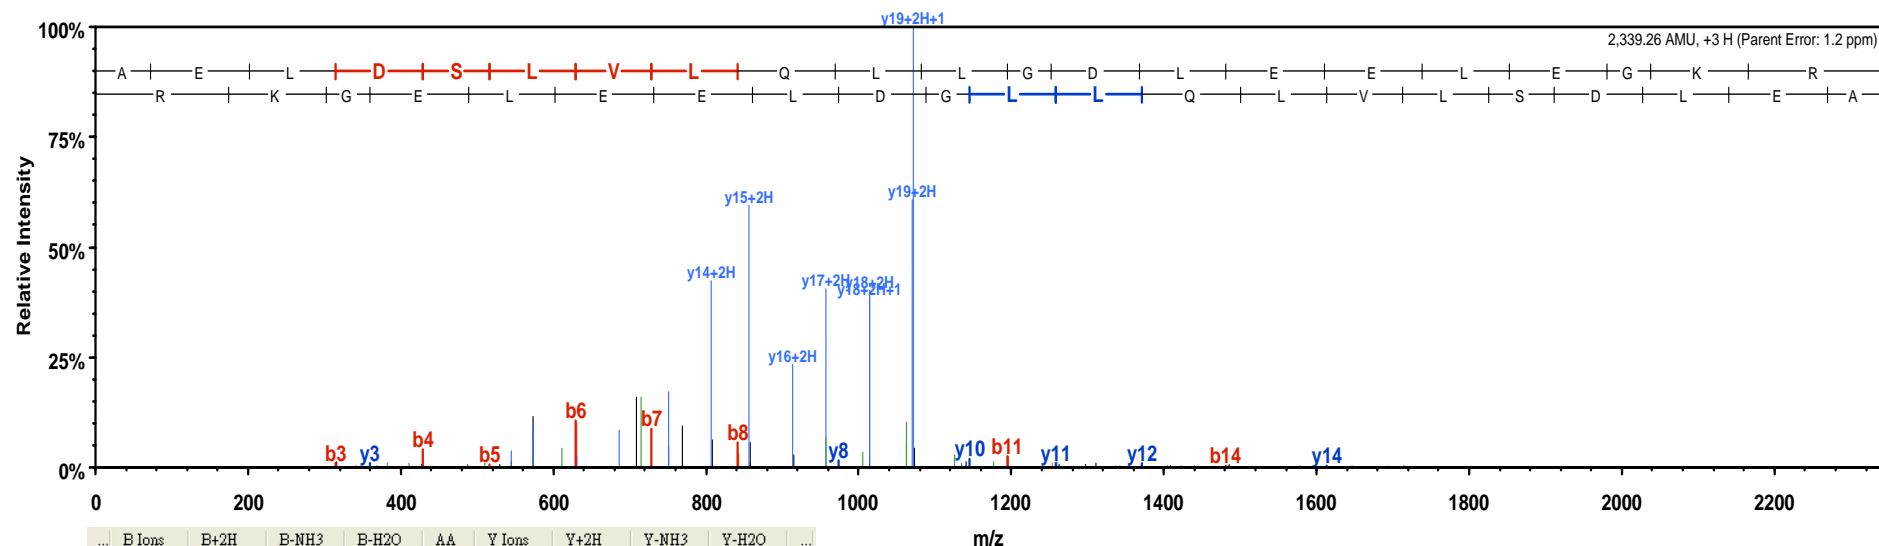

| ... | B Ions  | B+2H    | B-NH3   | B-H2O   | AA | Y Ions  | Y+2H    | Y-NH3   | Y-H2O   | ... |
|-----|---------|---------|---------|---------|----|---------|---------|---------|---------|-----|
| 1   | 72.0    |         |         |         | A  | 2,340.3 | 1,170.6 | 2,323.2 | 2,322.3 | 21  |
| 2   | 201.1   |         |         | 183.1   | E  | 2,269.2 | 1,135.1 | 2,252.2 | 2,251.2 | 20  |
| 3   | 314.2   |         |         | 296.2   | L  | 2,140.2 | 1,070.6 | 2,123.2 | 2,122.2 | 19  |
| 4   | 429.2   |         |         | 411.2   | D  | 2,027.1 | 1,014.1 | 2,010.1 | 2,009.1 | 18  |
| 5   | 516.2   |         |         | 498.2   | S  | 1,912.1 | 956.5   | 1,895.0 | 1,894.1 | 17  |
| 6   | 629.3   | 315.2   |         | 611.3   | L  | 1,825.0 | 913.0   | 1,808.0 | 1,807.0 | 16  |
| 7   | 728.4   | 364.7   |         | 710.4   | V  | 1,712.0 | 856.5   | 1,694.9 | 1,693.9 | 15  |
| 8   | 841.5   | 421.2   |         | 823.5   | L  | 1,612.9 | 806.9   | 1,595.9 | 1,594.9 | 14  |
| 9   | 969.5   | 485.3   | 952.5   | 951.5   | Q  | 1,499.8 | 750.4   | 1,482.8 | 1,481.8 | 13  |
| 10  | 1,082.6 | 541.8   | 1,065.6 | 1,064.6 | L  | 1,371.7 | 686.4   | 1,354.7 | 1,353.7 | 12  |
| 11  | 1,195.7 | 598.4   | 1,178.7 | 1,177.7 | L  | 1,258.7 | 629.8   | 1,241.6 | 1,240.7 | 11  |
| 12  | 1,252.7 | 626.9   | 1,235.7 | 1,234.7 | G  | 1,145.6 | 573.3   | 1,128.6 | 1,127.6 | 10  |
| 13  | 1,367.7 | 684.4   | 1,350.7 | 1,349.7 | D  | 1,088.6 | 544.8   | 1,071.5 | 1,070.5 | 9   |
| 14  | 1,480.8 | 740.9   | 1,463.8 | 1,462.8 | L  | 973.5   | 487.3   | 956.5   | 955.5   | 8   |
| 15  | 1,609.9 | 805.4   | 1,592.8 | 1,591.9 | E  | 860.4   | 430.7   | 843.4   | 842.4   | 7   |
| 16  | 1,738.9 | 870.0   | 1,721.9 | 1,720.9 | E  | 731.4   | 366.2   | 714.4   | 713.4   | 6   |
| 17  | 1,852.0 | 926.5   | 1,835.0 | 1,834.0 | L  | 602.4   | 301.7   | 585.3   | 584.4   | 5   |
| 18  | 1,981.0 | 991.0   | 1,964.0 | 1,963.0 | E  | 489.3   | 245.1   | 472.3   | 471.3   | 4   |
| 19  | 2,038.1 | 1,019.5 | 2,021.0 | 2,020.0 | G  | 360.2   | 180.6   | 343.2   |         | 3   |
| 20  | 2,166.2 | 1,083.6 | 2,149.1 | 2,148.1 | K  | 303.2   | 152.1   | 286.2   |         | 2   |
| 21  | 2,340.3 | 1,170.6 | 2,323.2 | 2,322.3 | R  | 175.1   |         | 158.1   |         | 1   |

# Whole proteome

| Protein No. | Leading protein name | Sequence          | Mascot Score | Variable Modifications | SILAC State | Charge | m/z      |
|-------------|----------------------|-------------------|--------------|------------------------|-------------|--------|----------|
| W-55        | splQ9NPA8IENY2_HUMAN | GLEHVTVDDLVAEITPK | 71.92        | Unmodified             | Light       | 2      | 918.4911 |

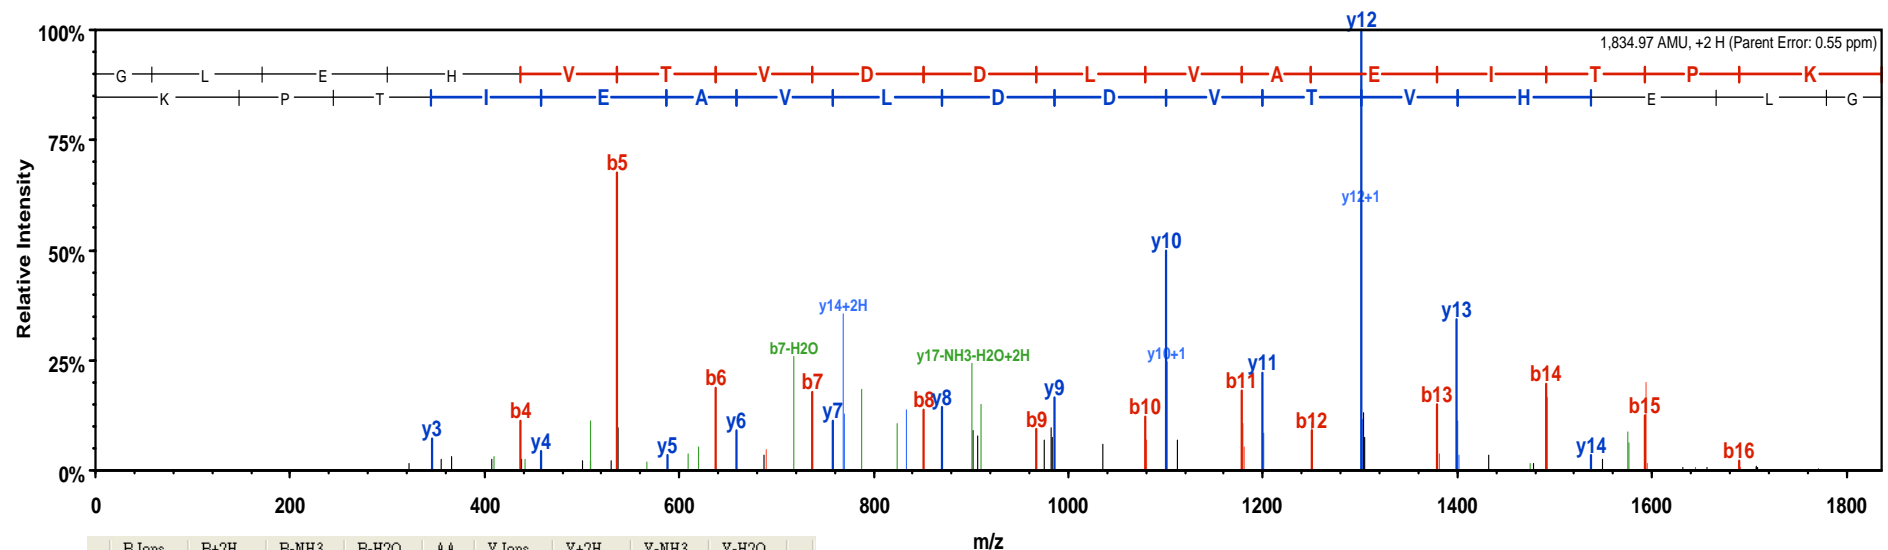

| ... | E Ions  | B+2H  | B-NH3   | B-H2O   | AA | Y Ions  | Y+2H  | Y-NH3   | Y-H2O   | ... |
|-----|---------|-------|---------|---------|----|---------|-------|---------|---------|-----|
| 1   | 58.0    |       |         |         | G  | 1,836.0 | 918.5 | 1,818.9 | 1,818.0 | 17  |
| 2   | 171.1   |       |         |         | L  | 1,779.0 | 890.0 | 1,761.9 | 1,760.9 | 16  |
| 3   | 300.2   |       |         | 282.1   | E  | 1,665.9 | 833.4 | 1,648.8 | 1,647.9 | 15  |
| 4   | 437.2   | 219.1 |         | 419.2   | H  | 1,536.8 | 768.9 | 1,519.8 | 1,518.8 | 14  |
| 5   | 536.3   | 268.6 |         | 518.3   | V  | 1,399.8 | 700.4 | 1,382.7 | 1,381.8 | 13  |
| 6   | 637.3   | 319.2 |         | 619.3   | T  | 1,300.7 | 650.9 | 1,283.7 | 1,282.7 | 12  |
| 7   | 736.4   | 368.7 |         | 718.4   | V  | 1,199.7 | 600.3 | 1,182.6 | 1,181.6 | 11  |
| 8   | 851.4   | 426.2 |         | 833.4   | D  | 1,100.6 | 550.8 | 1,083.6 | 1,082.6 | 10  |
| 9   | 966.5   | 483.7 |         | 948.4   | D  | 985.6   | 493.3 | 968.5   | 967.5   | 9   |
| 10  | 1,079.5 | 540.3 |         | 1,061.5 | L  | 870.5   | 435.8 | 853.5   | 852.5   | 8   |
| 11  | 1,178.6 | 589.8 |         | 1,160.6 | V  | 757.4   | 379.2 | 740.4   | 739.4   | 7   |
| 12  | 1,249.6 | 625.3 |         | 1,231.6 | A  | 658.4   | 329.7 | 641.4   | 640.4   | 6   |
| 13  | 1,378.7 | 689.8 |         | 1,360.7 | E  | 587.3   |       | 570.3   | 569.3   | 5   |
| 14  | 1,491.8 | 746.4 |         | 1,473.8 | I  | 458.3   |       | 441.3   | 440.3   | 4   |
| 15  | 1,592.8 | 796.9 |         | 1,574.8 | T  | 345.2   |       | 328.2   | 327.2   | 3   |
| 16  | 1,689.9 | 845.4 |         | 1,671.9 | P  | 244.2   |       | 227.1   |         | 2   |
| 17  | 1,836.0 | 918.5 | 1,818.9 | 1,818.0 | K  | 147.1   |       | 130.1   |         | 1   |



# Whole proteome

| Protein No. | Leading protein name  | Sequence            | Mascot Score | Variable Modifications | SILAC State | Charge | m/z       |
|-------------|-----------------------|---------------------|--------------|------------------------|-------------|--------|-----------|
| W-26        | splQ9Y375ICIA30_HUMAN | EVALDITSSEEKPDVSFDK | 71.92        | Unmodified             | Light       | 2      | 1055.0153 |

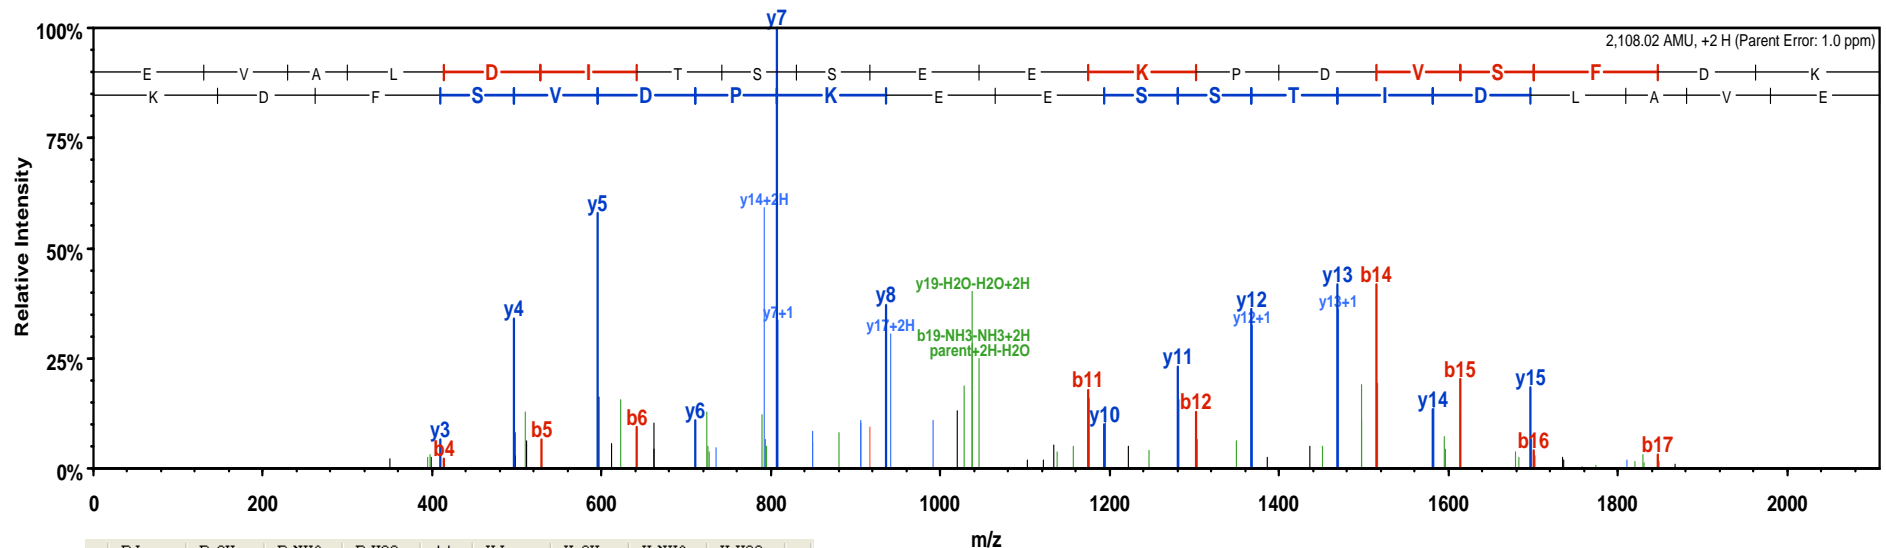

| ... | B Ions  | B+2H    | B-NH3   | B-H2O   | AA | Y Ions  | Y+2H    | Y-NH3   | Y-H2O   | ... |
|-----|---------|---------|---------|---------|----|---------|---------|---------|---------|-----|
| 1   | 130.0   |         |         | 112.0   | E  | 2,109.0 | 1,055.0 | 2,092.0 | 2,091.0 | 19  |
| 2   | 229.1   |         |         | 211.1   | V  | 1,980.0 | 990.5   | 1,963.0 | 1,962.0 | 18  |
| 3   | 300.2   |         |         | 282.1   | A  | 1,880.9 | 941.0   | 1,863.9 | 1,862.9 | 17  |
| 4   | 413.2   |         |         | 395.2   | L  | 1,809.9 | 905.4   | 1,792.8 | 1,791.9 | 16  |
| 5   | 528.3   |         |         | 510.3   | D  | 1,696.8 | 848.9   | 1,679.8 | 1,678.8 | 15  |
| 6   | 641.4   | 321.2   |         | 623.3   | I  | 1,581.8 | 791.4   | 1,564.7 | 1,563.8 | 14  |
| 7   | 742.4   | 371.7   |         | 724.4   | T  | 1,468.7 | 734.8   | 1,451.7 | 1,450.7 | 13  |
| 8   | 829.4   | 415.2   |         | 811.4   | S  | 1,367.6 | 684.3   | 1,350.6 | 1,349.6 | 12  |
| 9   | 916.5   | 458.7   |         | 898.5   | S  | 1,280.6 | 640.8   | 1,263.6 | 1,262.6 | 11  |
| 10  | 1,045.5 | 523.3   |         | 1,027.5 | E  | 1,193.6 | 597.3   | 1,176.5 | 1,175.6 | 10  |
| 11  | 1,174.5 | 587.8   |         | 1,156.5 | E  | 1,064.5 | 532.8   | 1,047.5 | 1,046.5 | 9   |
| 12  | 1,302.6 | 651.8   | 1,285.6 | 1,284.6 | K  | 935.5   | 468.2   | 918.5   | 917.5   | 8   |
| 13  | 1,399.7 | 700.4   | 1,382.7 | 1,381.7 | P  | 807.4   | 404.2   | 790.4   | 789.4   | 7   |
| 14  | 1,514.7 | 757.9   | 1,497.7 | 1,496.7 | D  | 710.3   | 355.7   | 693.3   | 692.3   | 6   |
| 15  | 1,613.8 | 807.4   | 1,596.8 | 1,595.8 | V  | 595.3   |         | 578.3   | 577.3   | 5   |
| 16  | 1,700.8 | 850.9   | 1,683.8 | 1,682.8 | S  | 496.2   |         | 479.2   | 478.2   | 4   |
| 17  | 1,847.9 | 924.4   | 1,830.9 | 1,829.9 | F  | 409.2   |         | 392.2   | 391.2   | 3   |
| 18  | 1,962.9 | 982.0   | 1,945.9 | 1,944.9 | D  | 262.1   |         | 245.1   | 244.1   | 2   |
| 19  | 2,109.0 | 1,055.0 | 2,092.0 | 2,091.0 | K  | 147.1   |         | 130.1   |         | 1   |

# Whole proteome

| Protein No. | Leading protein name  | Sequence         | Mascot Score | Variable Modifications | SILAC State | Charge | m/z       |
|-------------|-----------------------|------------------|--------------|------------------------|-------------|--------|-----------|
| W-57        | sp Q9H9B1 EHMT1_HUMAN | ETLESALIALDSEKPK | 71.6         | Unmodified             | Heavy       | 2      | 872.47237 |

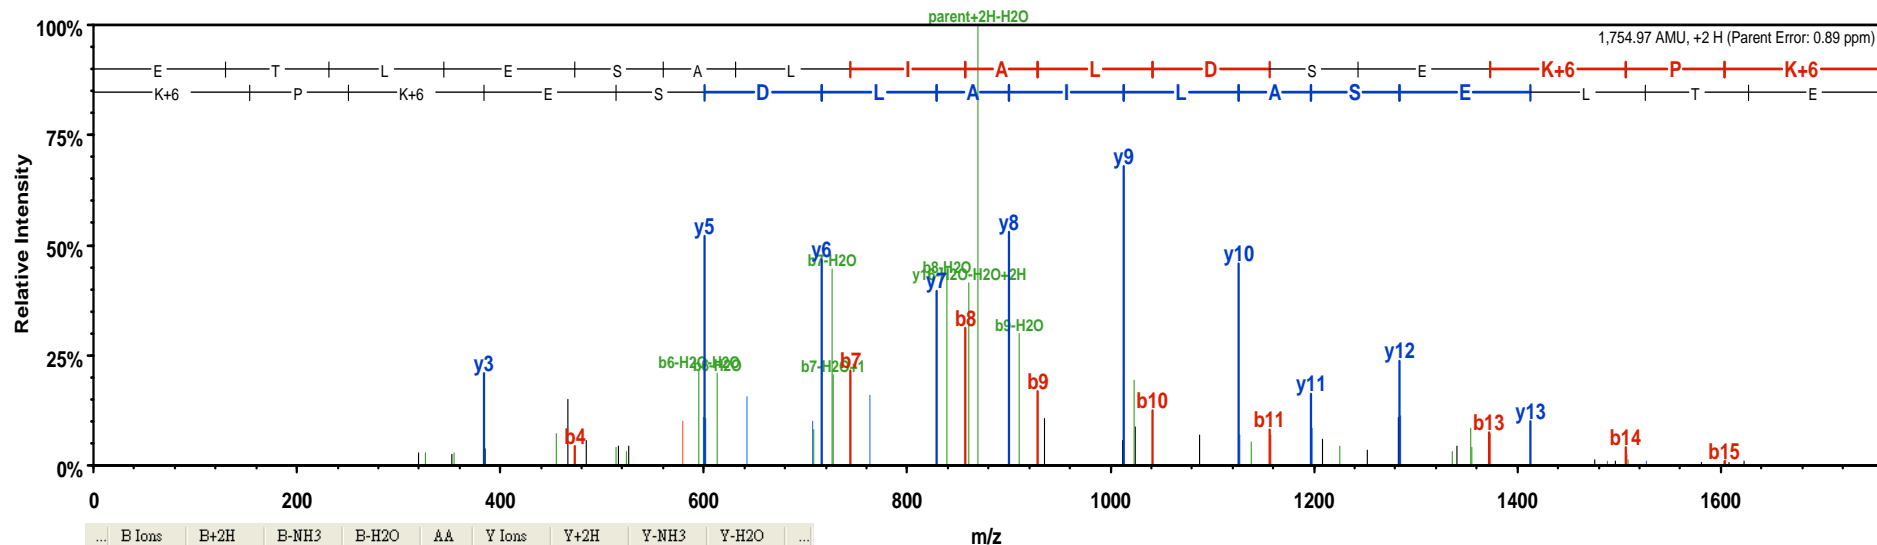

| ... | B Ions  | B+2H  | B-NH3   | B-H2O   | AA  | Y Ions  | Y+2H  | Y-NH3   | Y-H2O   | ... |
|-----|---------|-------|---------|---------|-----|---------|-------|---------|---------|-----|
| 1   | 130.0   |       |         | 112.0   | E   | 1,756.0 | 878.5 | 1,739.0 | 1,738.0 | 16  |
| 2   | 231.1   |       |         | 213.1   | T   | 1,626.9 | 814.0 | 1,609.9 | 1,608.9 | 15  |
| 3   | 344.2   |       |         | 326.2   | L   | 1,525.9 | 763.4 | 1,508.9 | 1,507.9 | 14  |
| 4   | 473.2   |       |         | 455.2   | E   | 1,412.8 | 706.9 | 1,395.8 | 1,394.8 | 13  |
| 5   | 560.3   |       |         | 542.2   | S   | 1,283.8 | 642.4 | 1,266.7 | 1,265.8 | 12  |
| 6   | 631.3   | 316.2 |         | 613.3   | A   | 1,196.7 | 598.9 | 1,179.7 | 1,178.7 | 11  |
| 7   | 744.4   | 372.7 |         | 726.4   | L   | 1,125.7 | 563.3 | 1,108.7 | 1,107.7 | 10  |
| 8   | 857.5   | 429.2 |         | 839.5   | I   | 1,012.6 | 506.8 | 995.6   | 994.6   | 9   |
| 9   | 928.5   | 464.8 |         | 910.5   | A   | 899.5   | 450.3 | 882.5   | 881.5   | 8   |
| 10  | 1,041.6 | 521.3 |         | 1,023.6 | L   | 828.5   | 414.7 | 811.5   | 810.5   | 7   |
| 11  | 1,156.6 | 578.8 |         | 1,138.6 | D   | 715.4   | 358.2 | 698.4   | 697.4   | 6   |
| 12  | 1,243.6 | 622.3 |         | 1,225.6 | S   | 600.4   | 300.7 | 583.3   | 582.4   | 5   |
| 13  | 1,372.7 | 686.8 |         | 1,354.7 | E   | 513.3   | 257.2 | 496.3   | 495.3   | 4   |
| 14  | 1,506.8 | 753.9 | 1,489.8 | 1,488.8 | K+6 | 384.3   | 192.7 | 367.3   |         | 3   |
| 15  | 1,603.9 | 802.4 | 1,586.8 | 1,585.8 | P   | 250.2   |       | 233.2   |         | 2   |
| 16  | 1,756.0 | 878.5 | 1,739.0 | 1,738.0 | K+6 | 153.1   |       | 136.1   |         | 1   |

# Whole proteome

| Protein No. | Leading protein name  | Sequence      | Mascot Score | Variable Modifications   | SILAC State | Charge | m/z       |
|-------------|-----------------------|---------------|--------------|--------------------------|-------------|--------|-----------|
| W-58        | sp Q9BPX6 CBAA1_HUMAN | QPEHLGLDQYIIK | 71.04        | Gln->pyro-Glu (N-term Q) | Light       | 2      | 768.90647 |

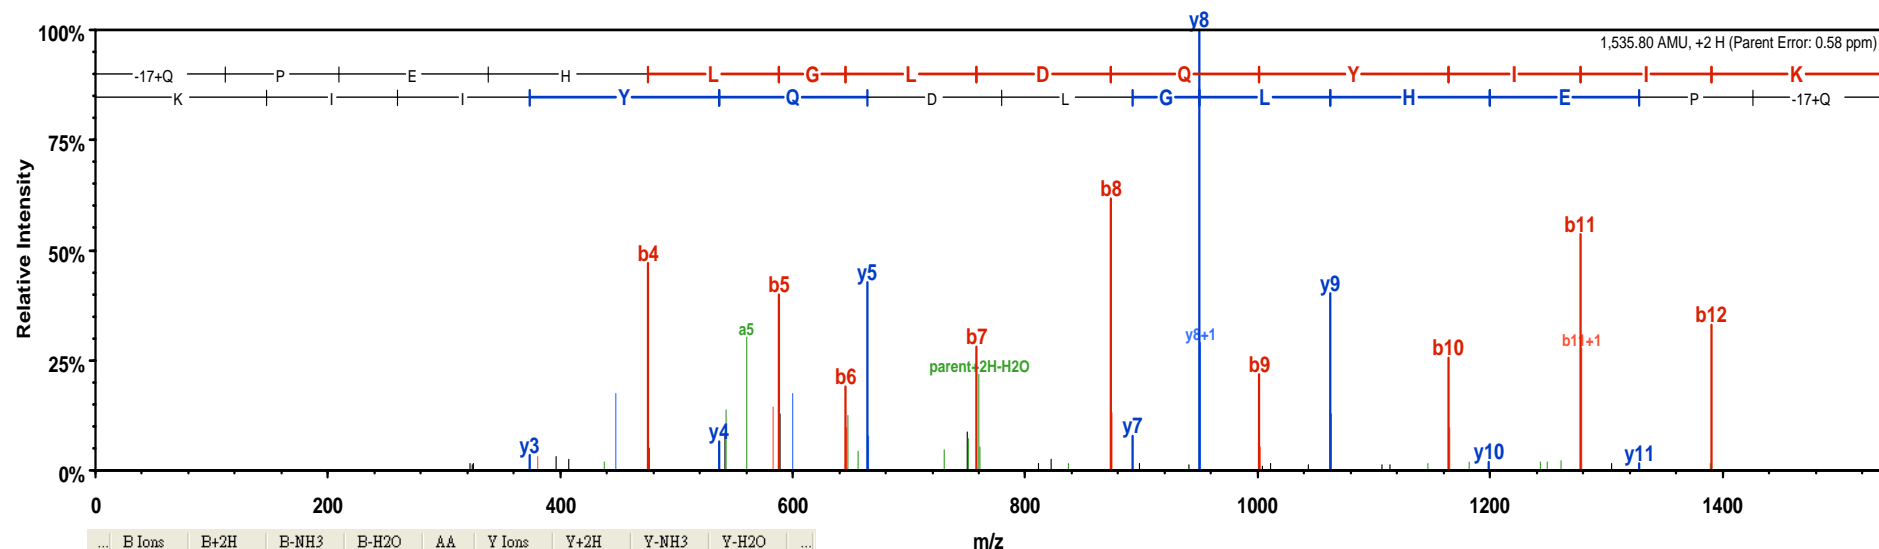

| ... | B Ions  | B+2H  | B-NH3   | B-H2O   | AA   | Y Ions  | Y+2H  | Y-NH3   | Y-H2O   | ... |
|-----|---------|-------|---------|---------|------|---------|-------|---------|---------|-----|
| 1   | 112.0   |       | 95.0    |         | Q-17 | 1,536.8 | 768.9 | 1,519.8 | 1,518.8 | 13  |
| 2   | 209.1   |       | 192.1   |         | P    | 1,425.8 | 713.4 | 1,408.7 | 1,407.8 | 12  |
| 3   | 338.1   |       | 321.1   | 320.1   | E    | 1,328.7 | 664.9 | 1,311.7 | 1,310.7 | 11  |
| 4   | 475.2   | 238.1 | 458.2   | 457.2   | H    | 1,199.7 | 600.3 | 1,182.7 | 1,181.7 | 10  |
| 5   | 588.3   | 294.6 | 571.3   | 570.3   | L    | 1,062.6 | 531.8 | 1,045.6 | 1,044.6 | 9   |
| 6   | 645.3   | 323.2 | 628.3   | 627.3   | G    | 949.5   | 475.3 | 932.5   | 931.5   | 8   |
| 7   | 758.4   | 379.7 | 741.4   | 740.4   | L    | 892.5   | 446.8 | 875.5   | 874.5   | 7   |
| 8   | 873.4   | 437.2 | 856.4   | 855.4   | D    | 779.4   | 390.2 | 762.4   | 761.4   | 6   |
| 9   | 1,001.5 | 501.2 | 984.4   | 983.5   | Q    | 664.4   |       | 647.4   |         | 5   |
| 10  | 1,164.5 | 582.8 | 1,147.5 | 1,146.5 | Y    | 536.3   |       | 519.3   |         | 4   |
| 11  | 1,277.6 | 639.3 | 1,260.6 | 1,259.6 | I    | 373.3   |       | 356.3   |         | 3   |
| 12  | 1,390.7 | 695.9 | 1,373.7 | 1,372.7 | I    | 260.2   |       | 243.2   |         | 2   |
| 13  | 1,536.8 | 768.9 | 1,519.8 | 1,518.8 | K    | 147.1   |       | 130.1   |         | 1   |

# Whole proteome

| Protein No. | Leading protein name  | Sequence              | Mascot Score | Variable Modifications | SILAC State | Charge | m/z       |
|-------------|-----------------------|-----------------------|--------------|------------------------|-------------|--------|-----------|
| W-59        | splQ92547 TOPB1_HUMAN | FNQLNEDVTHVIVGDYDDELK | 69.78        | Unmodified             | Light       | 2      | 1232.0874 |

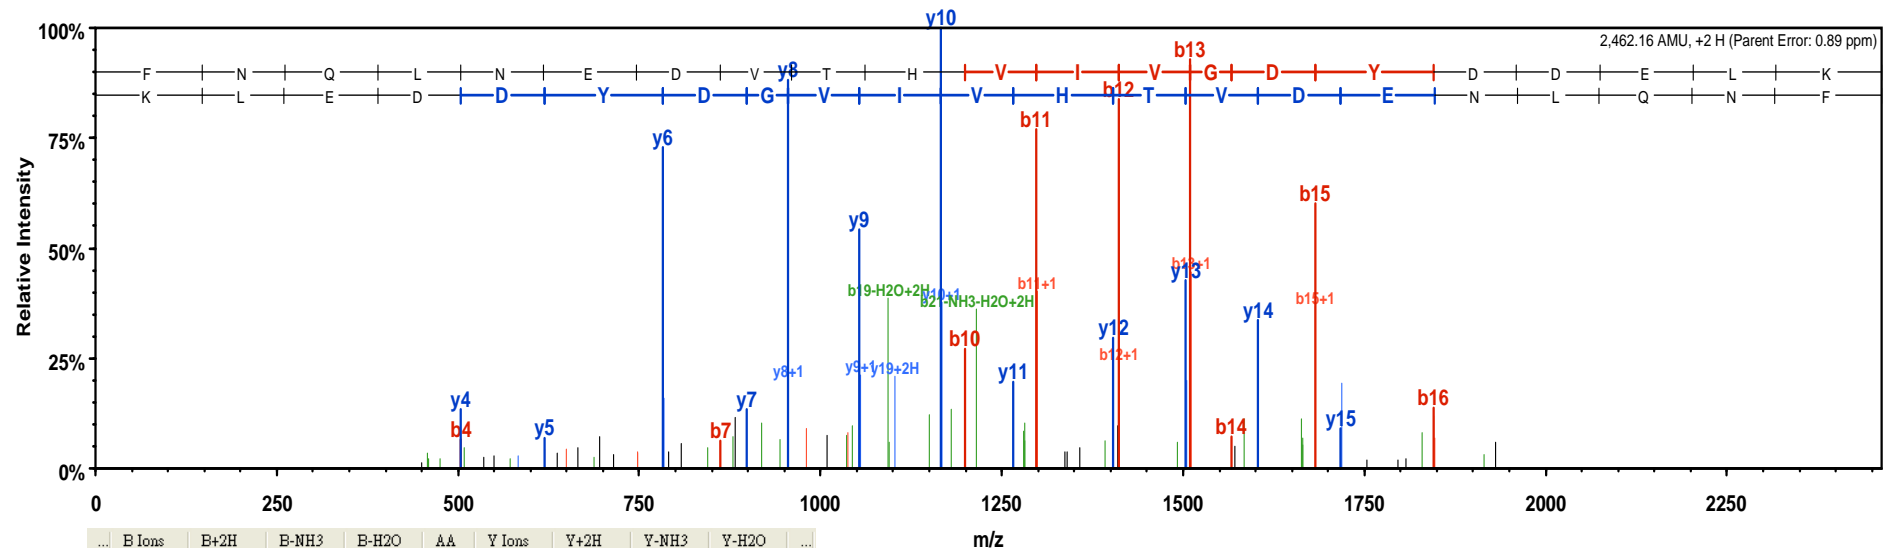

| ... | B Ions  | B+2H    | B-NH3   | B-H2O   | AA | Y Ions  | Y+2H    | Y-NH3   | Y-H2O   | ... |
|-----|---------|---------|---------|---------|----|---------|---------|---------|---------|-----|
| 1   | 148.1   |         |         |         | F  | 2,463.2 | 1,232.1 | 2,446.1 | 2,445.2 | 21  |
| 2   | 262.1   |         | 245.1   |         | N  | 2,316.1 | 1,158.6 | 2,299.1 | 2,298.1 | 20  |
| 3   | 390.2   |         | 373.2   |         | Q  | 2,202.1 | 1,101.5 | 2,185.0 | 2,184.0 | 19  |
| 4   | 503.3   |         | 486.2   |         | L  | 2,074.0 | 1,037.5 | 2,057.0 | 2,056.0 | 18  |
| 5   | 617.3   |         | 600.3   |         | N  | 1,960.9 | 981.0   | 1,943.9 | 1,942.9 | 17  |
| 6   | 746.3   | 373.7   | 729.3   | 728.3   | E  | 1,846.9 | 923.9   | 1,829.8 | 1,828.9 | 16  |
| 7   | 861.4   | 431.2   | 844.3   | 843.4   | D  | 1,717.8 | 859.4   | 1,700.8 | 1,699.8 | 15  |
| 8   | 960.4   | 480.7   | 943.4   | 942.4   | V  | 1,602.8 | 801.9   | 1,585.8 | 1,584.8 | 14  |
| 9   | 1,061.5 | 531.2   | 1,044.5 | 1,043.5 | T  | 1,503.7 | 752.4   | 1,486.7 | 1,485.7 | 13  |
| 10  | 1,198.5 | 599.8   | 1,181.5 | 1,180.5 | H  | 1,402.7 | 701.8   | 1,385.7 | 1,384.7 | 12  |
| 11  | 1,297.6 | 649.3   | 1,280.6 | 1,279.6 | V  | 1,265.6 | 633.3   | 1,248.6 | 1,247.6 | 11  |
| 12  | 1,410.7 | 705.9   | 1,393.7 | 1,392.7 | I  | 1,166.6 | 583.0   | 1,149.5 | 1,148.5 | 10  |
| 13  | 1,509.8 | 755.4   | 1,492.7 | 1,491.8 | V  | 1,053.5 | 527.2   | 1,036.4 | 1,035.5 | 9   |
| 14  | 1,566.8 | 783.9   | 1,549.8 | 1,548.8 | G  | 954.4   | 477.7   | 937.4   | 936.4   | 8   |
| 15  | 1,681.8 | 841.4   | 1,664.8 | 1,663.8 | D  | 897.4   | 449.2   | 880.4   | 879.4   | 7   |
| 16  | 1,844.9 | 922.9   | 1,827.9 | 1,826.9 | Y  | 782.4   | 391.7   | 765.3   | 764.3   | 6   |
| 17  | 1,959.9 | 980.5   | 1,942.9 | 1,941.9 | D  | 619.3   |         | 602.3   | 601.3   | 5   |
| 18  | 2,074.9 | 1,038.0 | 2,057.9 | 2,056.9 | D  | 504.3   |         | 487.2   | 486.3   | 4   |
| 19  | 2,204.0 | 1,102.5 | 2,187.0 | 2,186.0 | E  | 389.2   |         | 372.2   | 371.2   | 3   |
| 20  | 2,317.1 | 1,159.0 | 2,300.0 | 2,299.1 | L  | 260.2   |         | 243.2   |         | 2   |
| 21  | 2,463.2 | 1,232.1 | 2,446.1 | 2,445.2 | K  | 147.1   |         | 130.1   |         | 1   |

# Whole proteome

| Protein No. | Leading protein name  | Sequence          | Mascot Score | Variable Modifications | SILAC State | Charge | m/z       |
|-------------|-----------------------|-------------------|--------------|------------------------|-------------|--------|-----------|
| W-60        | spIP56277IMTCPA_HUMAN | SVVCSGFEEKEEENLNR | 69.48        | Unmodified             | Heavy       | 2      | 1006.9651 |

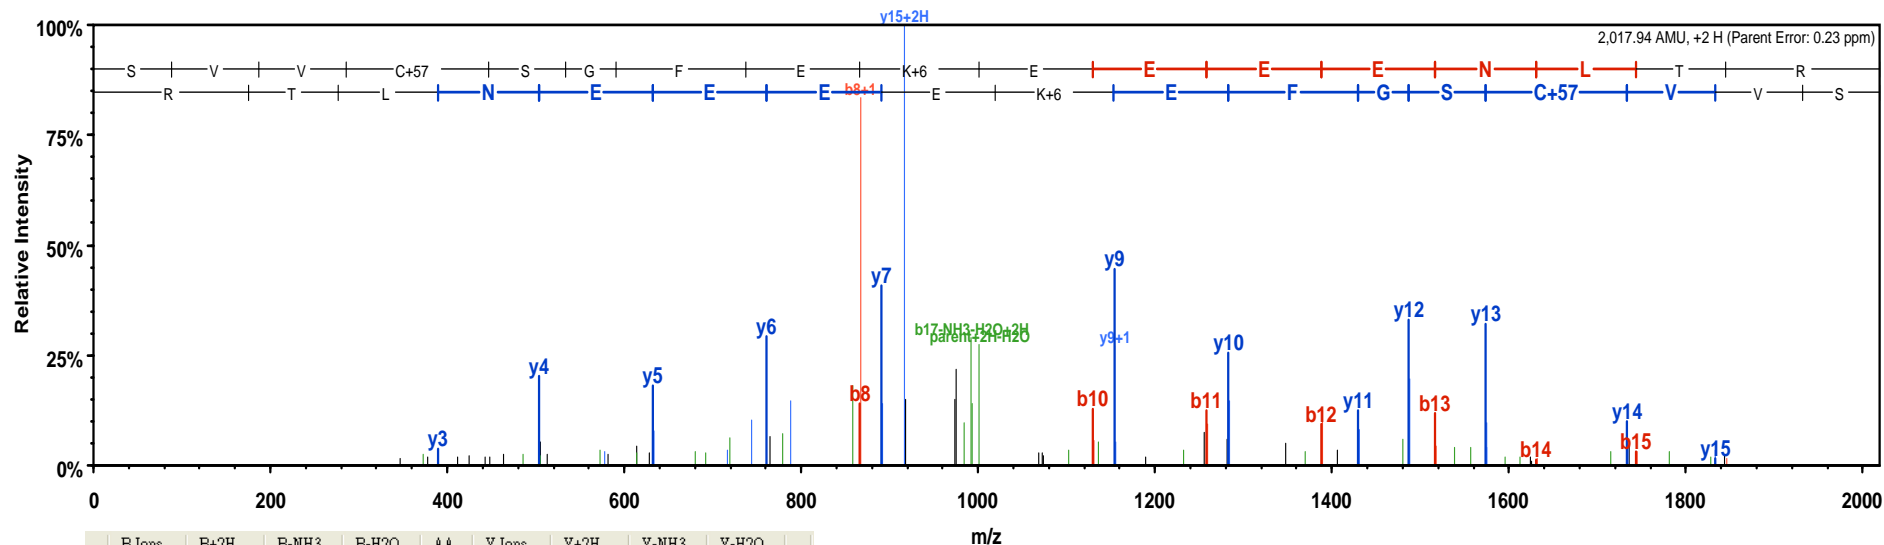

| ... | E Ions  | B+2H    | B-NH3   | B-H2O   | AA   | Y Ions  | Y+2H    | Y-NH3   | Y-H2O   | ... |
|-----|---------|---------|---------|---------|------|---------|---------|---------|---------|-----|
| 1   | 88.0    |         |         | 70.0    | S    | 2,018.9 | 1,010.0 | 2,001.9 | 2,000.9 | 17  |
| 2   | 187.1   |         |         | 169.1   | V    | 1,931.9 | 966.5   | 1,914.9 | 1,913.9 | 16  |
| 3   | 286.2   |         |         | 268.2   | V    | 1,832.8 | 916.9   | 1,815.8 | 1,814.8 | 15  |
| 4   | 446.2   |         |         | 428.2   | C+57 | 1,733.8 | 867.4   | 1,716.7 | 1,715.8 | 14  |
| 5   | 533.2   |         |         | 515.2   | S    | 1,573.7 | 787.4   | 1,556.7 | 1,555.7 | 13  |
| 6   | 590.3   | 295.6   |         | 572.2   | G    | 1,486.7 | 743.9   | 1,469.7 | 1,468.7 | 12  |
| 7   | 737.3   | 369.2   |         | 719.3   | F    | 1,429.7 | 715.3   | 1,412.7 | 1,411.7 | 11  |
| 8   | 866.4   | 433.7   |         | 848.4   | E    | 1,282.6 | 641.8   | 1,265.6 | 1,264.6 | 10  |
| 9   | 1,000.5 | 500.7   | 983.5   | 982.5   | K+6  | 1,153.6 | 577.3   | 1,136.6 | 1,135.6 | 9   |
| 10  | 1,129.5 | 565.3   | 1,112.5 | 1,111.5 | E    | 1,019.5 | 510.2   | 1,002.4 | 1,001.5 | 8   |
| 11  | 1,258.6 | 629.8   | 1,241.5 | 1,240.6 | E    | 890.4   | 445.7   | 873.4   | 872.4   | 7   |
| 12  | 1,387.6 | 694.3   | 1,370.6 | 1,369.6 | E    | 761.4   | 381.2   | 744.4   | 743.4   | 6   |
| 13  | 1,516.7 | 758.8   | 1,499.6 | 1,498.6 | E    | 632.3   |         | 615.3   | 614.3   | 5   |
| 14  | 1,630.7 | 815.9   | 1,613.7 | 1,612.7 | N    | 503.3   |         | 486.3   | 485.3   | 4   |
| 15  | 1,743.8 | 872.4   | 1,726.8 | 1,725.8 | L    | 389.3   |         | 372.2   | 371.2   | 3   |
| 16  | 1,844.8 | 922.9   | 1,827.8 | 1,826.8 | T    | 276.2   |         | 259.1   | 258.2   | 2   |
| 17  | 2,018.9 | 1,010.0 | 2,001.9 | 2,000.9 | R    | 175.1   |         | 158.1   |         | 1   |

# Whole proteome

| Protein No. | Leading protein name  | Sequence       | Mascot Score | Variable Modifications   | SILAC State | Charge | m/z       |
|-------------|-----------------------|----------------|--------------|--------------------------|-------------|--------|-----------|
| W-61        | splP20339IRAB5A_HUMAN | QASPNIVIALSGNK | 69.14        | Gln->pyro-Glu (N-term Q) | Heavy       | 2      | 697.88554 |

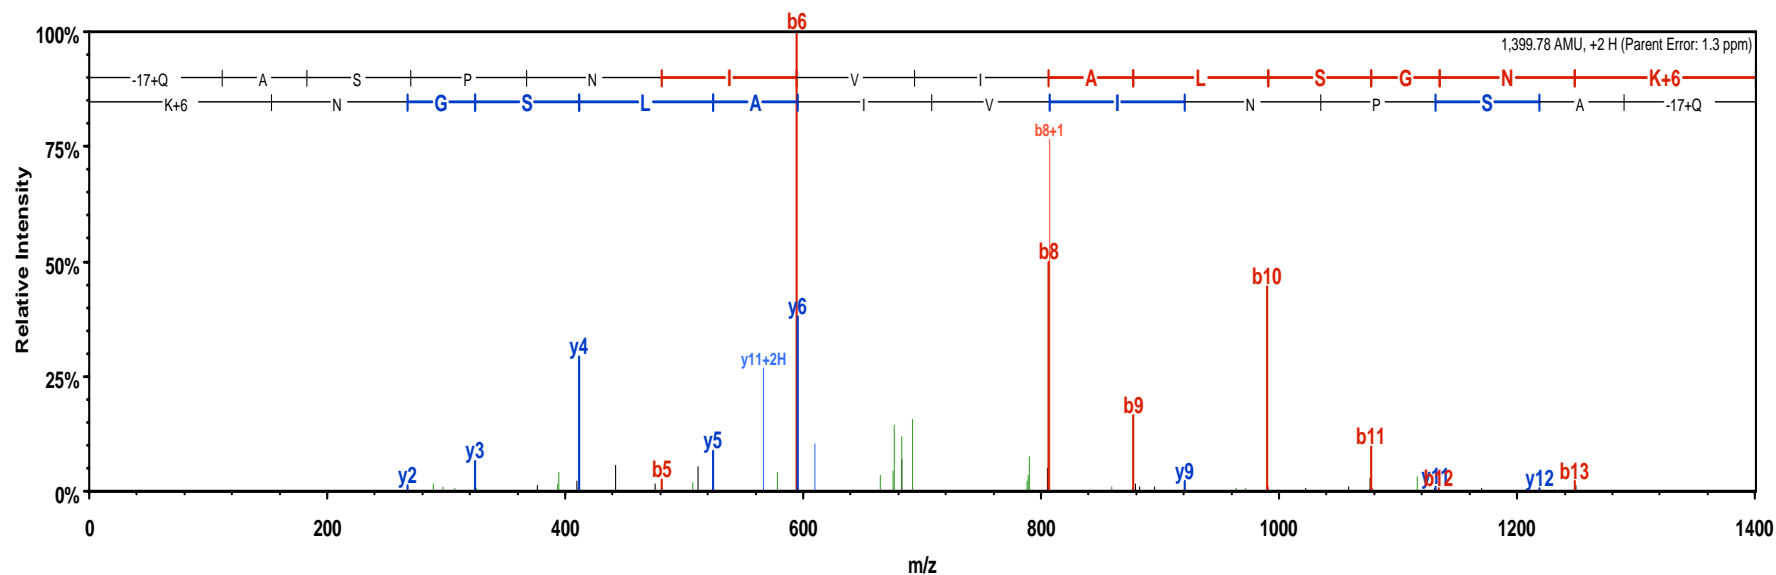

| ... | B Ions  | B+2H  | B-NH3   | B-H2O   | AA   | Y Ions  | Y+2H  | Y-NH3   | Y-H2O   | ... |
|-----|---------|-------|---------|---------|------|---------|-------|---------|---------|-----|
| 1   | 112.0   |       | 95.0    |         | Q-17 | 1,400.8 | 700.9 | 1,383.8 | 1,382.8 | 14  |
| 2   | 183.1   |       | 166.0   |         | A    | 1,289.8 | 645.4 | 1,272.7 | 1,271.7 | 13  |
| 3   | 270.1   |       | 253.1   | 252.1   | S    | 1,218.7 | 609.9 | 1,201.7 | 1,200.7 | 12  |
| 4   | 367.2   |       | 350.1   | 349.2   | P    | 1,131.7 | 566.3 | 1,114.7 | 1,113.7 | 11  |
| 5   | 481.2   |       | 464.2   | 463.2   | N    | 1,034.6 | 517.8 | 1,017.6 | 1,016.6 | 10  |
| 6   | 594.3   | 297.6 | 577.3   | 576.3   | I    | 920.6   | 460.8 | 903.6   | 902.6   | 9   |
| 7   | 693.4   | 347.2 | 676.3   | 675.3   | V    | 807.5   | 404.3 | 790.5   | 789.5   | 8   |
| 8   | 806.4   | 403.7 | 789.4   | 788.4   | I    | 708.4   | 354.7 | 691.4   | 690.4   | 7   |
| 9   | 877.5   | 439.2 | 860.5   | 859.5   | A    | 595.4   | 298.2 | 578.3   | 577.3   | 6   |
| 10  | 990.6   | 495.8 | 973.5   | 972.6   | L    | 524.3   |       | 507.3   | 506.3   | 5   |
| 11  | 1,077.6 | 539.3 | 1,060.6 | 1,059.6 | S    | 411.2   |       | 394.2   | 393.2   | 4   |
| 12  | 1,134.6 | 567.8 | 1,117.6 | 1,116.6 | G    | 324.2   |       | 307.2   |         | 3   |
| 13  | 1,248.7 | 624.8 | 1,231.6 | 1,230.6 | N    | 267.2   |       | 250.1   |         | 2   |
| 14  | 1,400.8 | 700.9 | 1,383.8 | 1,382.8 | K+6  | 153.1   |       | 136.1   |         | 1   |

# Whole proteome

| Protein No. | Leading protein name  | Sequence                    | Mascot Score | Variable Modifications | SILAC State | Charge | m/z      |
|-------------|-----------------------|-----------------------------|--------------|------------------------|-------------|--------|----------|
| W-62        | spIQ7Z4R8ICF120_HUMAN | VYYDGTVEQHPFGEEAYPADGADAGQK | 68.07        | Unmodified             | Light       | 3      | 952.7631 |

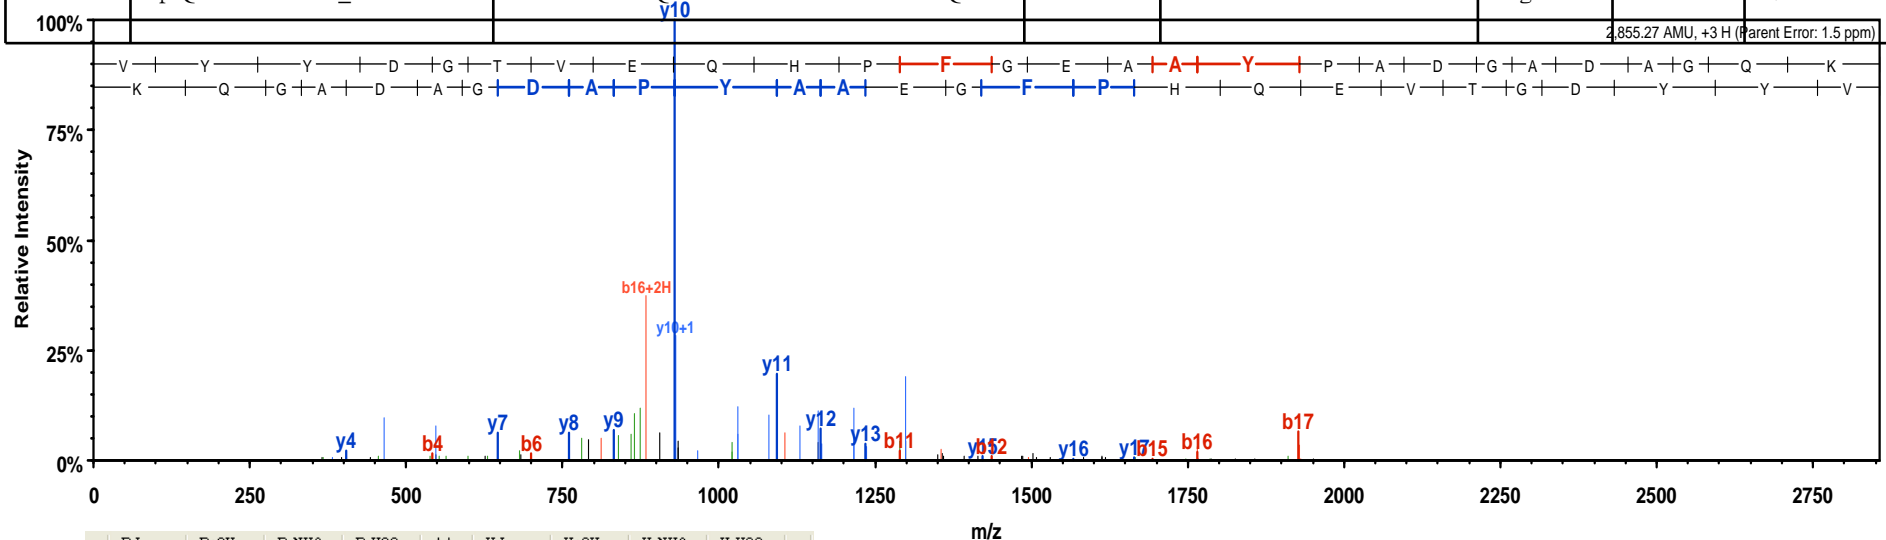

| ... | B Ions  | B+2H    | B-NH3   | B-H2O   | AA | Y Ions  | Y+2H    | Y-NH3   | Y-H2O   | ... |
|-----|---------|---------|---------|---------|----|---------|---------|---------|---------|-----|
| 1   | 100.1   |         |         |         | V  | 2,856.3 | 1,428.6 | 2,839.2 | 2,838.3 | 27  |
| 2   | 263.1   |         |         |         | Y  | 2,757.2 | 1,379.1 | 2,740.2 | 2,739.2 | 26  |
| 3   | 426.2   |         |         |         | Y  | 2,594.1 | 1,297.6 | 2,577.1 | 2,576.1 | 25  |
| 4   | 541.2   |         |         | 523.2   | D  | 2,431.1 | 1,216.0 | 2,414.1 | 2,413.1 | 24  |
| 5   | 598.3   |         |         | 580.2   | G  | 2,316.1 | 1,158.5 | 2,299.0 | 2,298.0 | 23  |
| 6   | 699.3   | 350.2   |         | 681.3   | T  | 2,259.0 | 1,130.0 | 2,242.0 | 2,241.0 | 22  |
| 7   | 798.4   | 399.7   |         | 780.4   | V  | 2,158.0 | 1,079.5 | 2,141.0 | 2,140.0 | 21  |
| 8   | 927.4   | 464.2   |         | 909.4   | E  | 2,058.9 | 1,030.0 | 2,041.9 | 2,040.9 | 20  |
| 9   | 1,055.5 | 528.2   | 1,038.4 | 1,037.5 | Q  | 1,929.9 | 965.4   | 1,912.8 | 1,911.9 | 19  |
| 10  | 1,192.5 | 596.8   | 1,175.5 | 1,174.5 | H  | 1,801.8 | 901.4   | 1,784.8 | 1,783.8 | 18  |
| 11  | 1,289.6 | 645.3   | 1,272.6 | 1,271.6 | P  | 1,664.8 | 832.9   | 1,647.7 | 1,646.7 | 17  |
| 12  | 1,436.6 | 718.8   | 1,419.6 | 1,418.6 | F  | 1,567.7 | 784.4   | 1,550.7 | 1,549.7 | 16  |
| 13  | 1,493.7 | 747.3   | 1,476.6 | 1,475.7 | G  | 1,420.6 | 710.8   | 1,403.6 | 1,402.6 | 15  |
| 14  | 1,622.7 | 811.9   | 1,605.7 | 1,604.7 | E  | 1,363.6 | 682.3   | 1,346.6 | 1,345.6 | 14  |
| 15  | 1,693.7 | 847.4   | 1,676.7 | 1,675.7 | A  | 1,234.6 | 617.8   | 1,217.5 | 1,216.6 | 13  |
| 16  | 1,764.8 | 882.9   | 1,747.8 | 1,746.8 | A  | 1,163.5 | 582.3   | 1,146.5 | 1,145.5 | 12  |
| 17  | 1,927.8 | 964.4   | 1,910.8 | 1,909.8 | Y  | 1,092.5 | 546.8   | 1,075.5 | 1,074.5 | 11  |
| 18  | 2,024.9 | 1,013.0 | 2,007.9 | 2,006.9 | P  | 929.4   | 465.2   | 912.4   | 911.4   | 10  |
| 19  | 2,095.9 | 1,048.5 | 2,078.9 | 2,077.9 | A  | 832.4   | 416.7   | 815.4   | 814.4   | 9   |
| 20  | 2,211.0 | 1,106.0 | 2,193.9 | 2,193.0 | D  | 761.3   | 381.2   | 744.3   | 743.3   | 8   |
| 21  | 2,268.0 | 1,134.5 | 2,251.0 | 2,250.0 | G  | 646.3   | 323.7   | 629.3   | 628.3   | 7   |
| 22  | 2,339.0 | 1,170.0 | 2,322.0 | 2,321.0 | A  | 589.3   | 295.2   | 572.3   | 571.3   | 6   |
| 23  | 2,454.1 | 1,227.5 | 2,437.0 | 2,436.0 | D  | 518.3   |         | 501.2   | 500.2   | 5   |
| 24  | 2,525.1 | 1,263.0 | 2,508.1 | 2,507.1 | A  | 403.2   |         | 386.2   |         | 4   |
| 25  | 2,582.1 | 1,291.6 | 2,565.1 | 2,564.1 | G  | 332.2   |         | 315.2   |         | 3   |
| 26  | 2,710.2 | 1,355.6 | 2,693.1 | 2,692.2 | Q  | 275.2   |         | 258.1   |         | 2   |
| 27  | 2,856.3 | 1,428.6 | 2,839.2 | 2,838.3 | K  | 147.1   |         | 130.1   |         | 1   |

# Whole proteome

| Protein No. | Leading protein name | Sequence        | Mascot Score | Variable Modifications | SILAC State | Charge | m/z       |
|-------------|----------------------|-----------------|--------------|------------------------|-------------|--------|-----------|
| W-63        | splQ9NV66 TYW1_HUMAN | EYDPDDHLIEEVTSK | 67.72        | Unmodified             | Light       | 2      | 895.40997 |

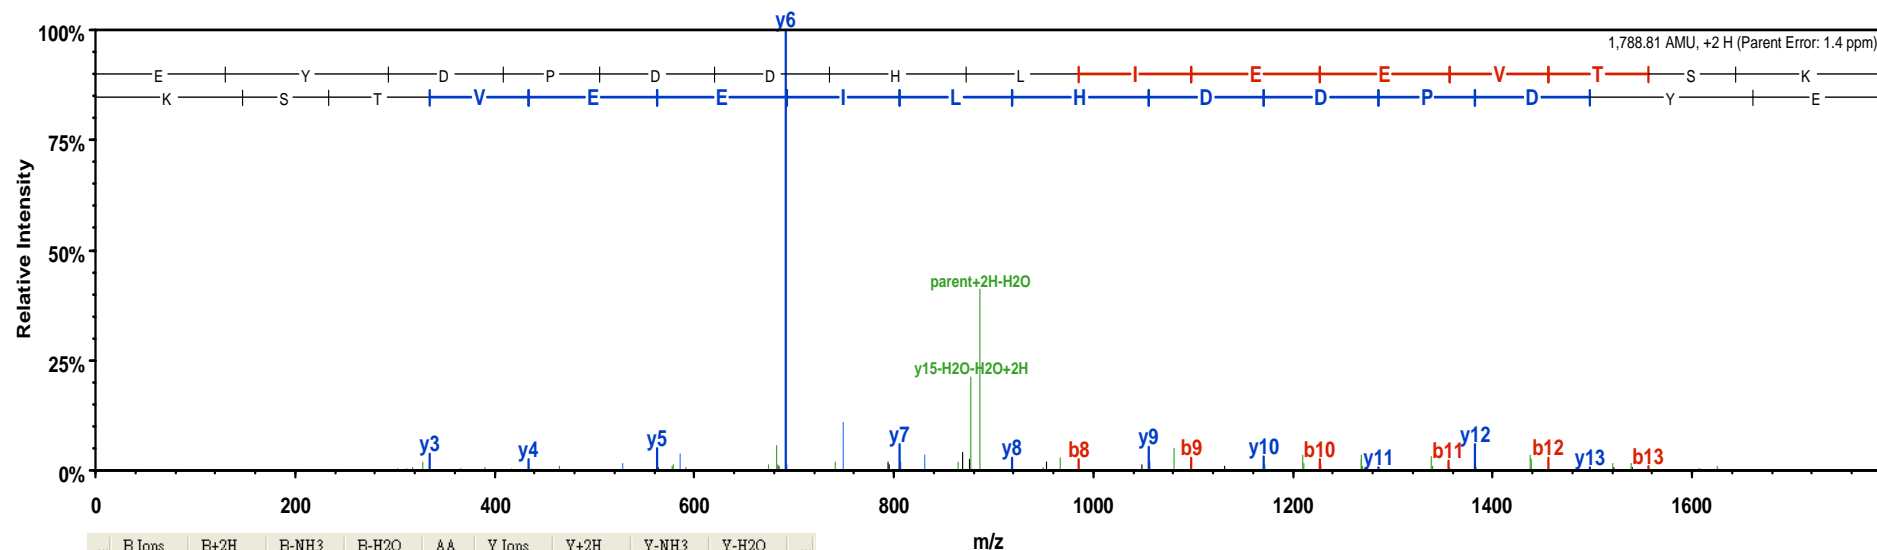

| ... | B Ions  | B+2H  | B-NH3   | B-H2O   | AA | Y Ions  | Y+2H  | Y-NH3   | Y-H2O   | ... |
|-----|---------|-------|---------|---------|----|---------|-------|---------|---------|-----|
| 1   | 130.0   |       |         | 112.0   | E  | 1,789.8 | 895.4 | 1,772.8 | 1,771.8 | 15  |
| 2   | 293.1   |       |         | 275.1   | Y  | 1,660.8 | 830.9 | 1,643.7 | 1,642.8 | 14  |
| 3   | 408.1   |       |         | 390.1   | D  | 1,497.7 | 749.4 | 1,480.7 | 1,479.7 | 13  |
| 4   | 505.2   |       |         | 487.2   | P  | 1,382.7 | 691.8 | 1,365.7 | 1,364.7 | 12  |
| 5   | 620.2   |       |         | 602.2   | D  | 1,285.6 | 643.3 | 1,268.6 | 1,267.6 | 11  |
| 6   | 735.2   | 368.1 |         | 717.2   | D  | 1,170.6 | 585.8 | 1,153.6 | 1,152.6 | 10  |
| 7   | 872.3   | 436.7 |         | 854.3   | H  | 1,055.6 | 528.3 | 1,038.5 | 1,037.6 | 9   |
| 8   | 985.4   | 493.2 |         | 967.4   | L  | 918.5   | 459.8 | 901.5   | 900.5   | 8   |
| 9   | 1,098.5 | 549.7 |         | 1,080.5 | I  | 805.4   | 403.2 | 788.4   | 787.4   | 7   |
| 10  | 1,227.5 | 614.3 |         | 1,209.5 | E  | 692.3   | 346.7 | 675.3   | 674.3   | 6   |
| 11  | 1,356.6 | 678.8 |         | 1,338.5 | E  | 563.3   |       | 546.3   | 545.3   | 5   |
| 12  | 1,455.6 | 728.3 |         | 1,437.6 | V  | 434.3   |       | 417.2   | 416.3   | 4   |
| 13  | 1,556.7 | 778.8 |         | 1,538.7 | T  | 335.2   |       | 318.2   | 317.2   | 3   |
| 14  | 1,643.7 | 822.4 |         | 1,625.7 | S  | 234.1   |       | 217.1   | 216.1   | 2   |
| 15  | 1,789.8 | 895.4 | 1,772.8 | 1,771.8 | K  | 147.1   |       | 130.1   |         | 1   |



# Whole proteome

| Protein No. | Leading protein name   | Sequence                | Mascot Score | Variable Modifications | SILAC State | Charge | m/z       |
|-------------|------------------------|-------------------------|--------------|------------------------|-------------|--------|-----------|
| W-64        | sp Q9NWX4 ICA123_HUMAN | ENSIEILSSTIKPYNAEDNENFK | 66.21        | Unmodified             | Light       | 3      | 885.76433 |

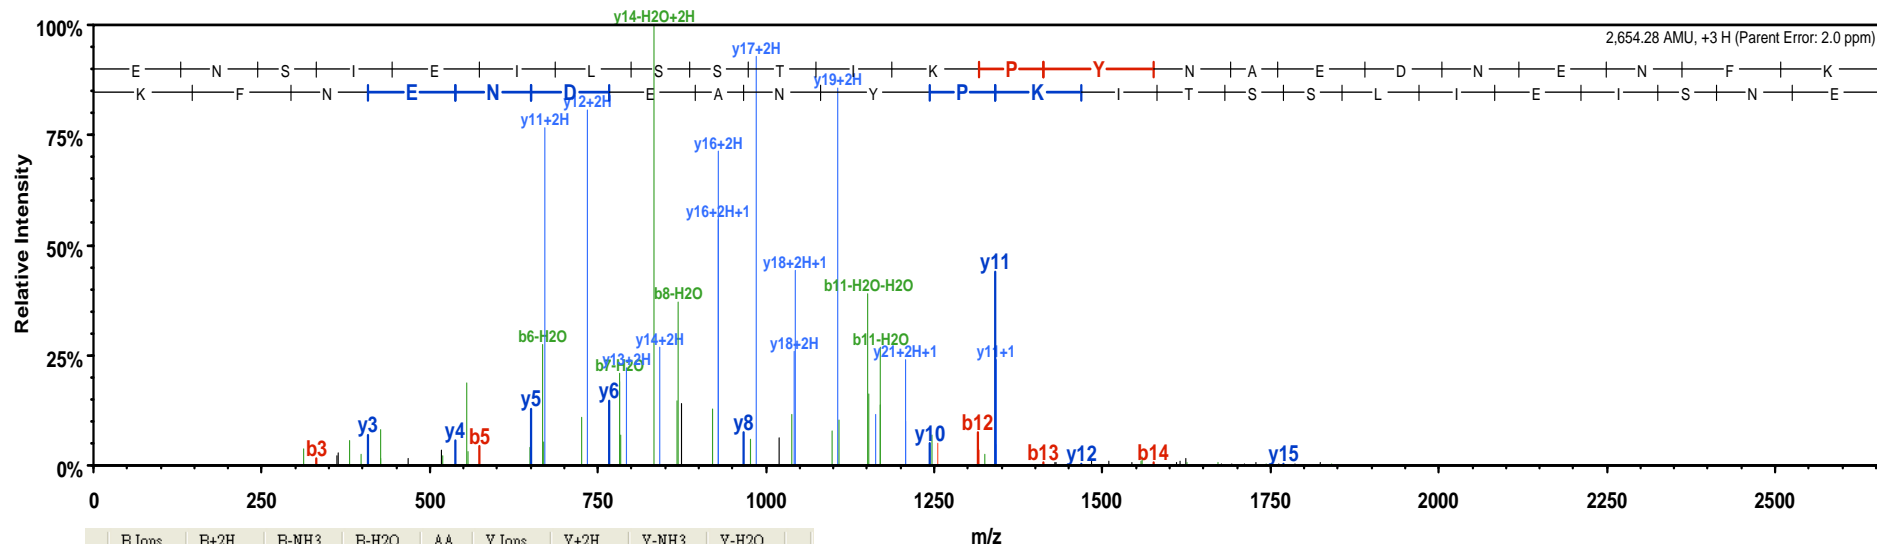

| ... | B Ions  | B+2H    | B-NH3   | B-H2O   | AA | Y Ions  | Y+2H    | Y-NH3   | Y-H2O   | ... |
|-----|---------|---------|---------|---------|----|---------|---------|---------|---------|-----|
| 1   | 130.0   |         |         | 112.0   | E  | 2,655.3 | 1,328.1 | 2,638.3 | 2,637.3 | 23  |
| 2   | 244.1   |         | 227.1   | 226.1   | N  | 2,526.2 | 1,263.6 | 2,509.2 | 2,508.2 | 22  |
| 3   | 331.1   |         | 314.1   | 313.1   | S  | 2,412.2 | 1,206.6 | 2,395.2 | 2,394.2 | 21  |
| 4   | 444.2   |         | 427.2   | 426.2   | I  | 2,325.2 | 1,163.1 | 2,308.1 | 2,307.2 | 20  |
| 5   | 573.3   |         | 556.2   | 555.2   | E  | 2,212.1 | 1,106.5 | 2,195.1 | 2,194.1 | 19  |
| 6   | 686.3   | 343.7   | 669.3   | 668.3   | I  | 2,083.0 | 1,042.0 | 2,066.0 | 2,065.0 | 18  |
| 7   | 799.4   | 400.2   | 782.4   | 781.4   | L  | 1,970.0 | 985.5   | 1,952.9 | 1,951.9 | 17  |
| 8   | 886.5   | 443.7   | 869.4   | 868.4   | S  | 1,856.9 | 928.9   | 1,839.8 | 1,838.9 | 16  |
| 9   | 973.5   | 487.2   | 956.5   | 955.5   | S  | 1,769.8 | 885.4   | 1,752.8 | 1,751.8 | 15  |
| 10  | 1,074.5 | 537.8   | 1,057.5 | 1,056.5 | T  | 1,682.8 | 841.9   | 1,665.8 | 1,664.8 | 14  |
| 11  | 1,187.6 | 594.3   | 1,170.6 | 1,169.6 | I  | 1,581.8 | 791.4   | 1,564.7 | 1,563.7 | 13  |
| 12  | 1,315.7 | 658.4   | 1,298.7 | 1,297.7 | K  | 1,468.7 | 734.8   | 1,451.6 | 1,450.7 | 12  |
| 13  | 1,412.8 | 706.9   | 1,395.7 | 1,394.8 | P  | 1,340.6 | 670.8   | 1,323.5 | 1,322.6 | 11  |
| 14  | 1,575.8 | 788.4   | 1,558.8 | 1,557.8 | Y  | 1,243.5 | 622.3   | 1,226.5 | 1,225.5 | 10  |
| 15  | 1,689.9 | 845.4   | 1,672.8 | 1,671.9 | N  | 1,080.5 | 540.7   | 1,063.4 | 1,062.4 | 9   |
| 16  | 1,760.9 | 881.0   | 1,743.9 | 1,742.9 | A  | 966.4   | 483.7   | 949.4   | 948.4   | 8   |
| 17  | 1,889.9 | 945.5   | 1,872.9 | 1,871.9 | E  | 895.4   | 448.2   | 878.4   | 877.4   | 7   |
| 18  | 2,005.0 | 1,003.0 | 1,987.9 | 1,987.0 | D  | 766.3   | 383.7   | 749.3   | 748.3   | 6   |
| 19  | 2,119.0 | 1,060.0 | 2,102.0 | 2,101.0 | N  | 651.3   |         | 634.3   | 633.3   | 5   |
| 20  | 2,248.1 | 1,124.5 | 2,231.0 | 2,230.1 | E  | 537.3   |         | 520.2   | 519.3   | 4   |
| 21  | 2,362.1 | 1,181.6 | 2,345.1 | 2,344.1 | N  | 408.2   |         | 391.2   |         | 3   |
| 22  | 2,509.2 | 1,255.1 | 2,492.1 | 2,491.2 | F  | 294.2   |         | 277.2   |         | 2   |
| 23  | 2,655.3 | 1,328.1 | 2,638.3 | 2,637.3 | K  | 147.1   |         | 130.1   |         | 1   |

# Whole proteome

| Protein No. | Leading protein name | Sequence             | Mascot Score | Variable Modifications | SILAC State | Charge | m/z       |
|-------------|----------------------|----------------------|--------------|------------------------|-------------|--------|-----------|
| W-65        | sp O15381 INVL_HUMAN | ALGLVTPAGVLLAGPPGCGK | 65.54        | Unmodified             | Light       | 2      | 924.52422 |

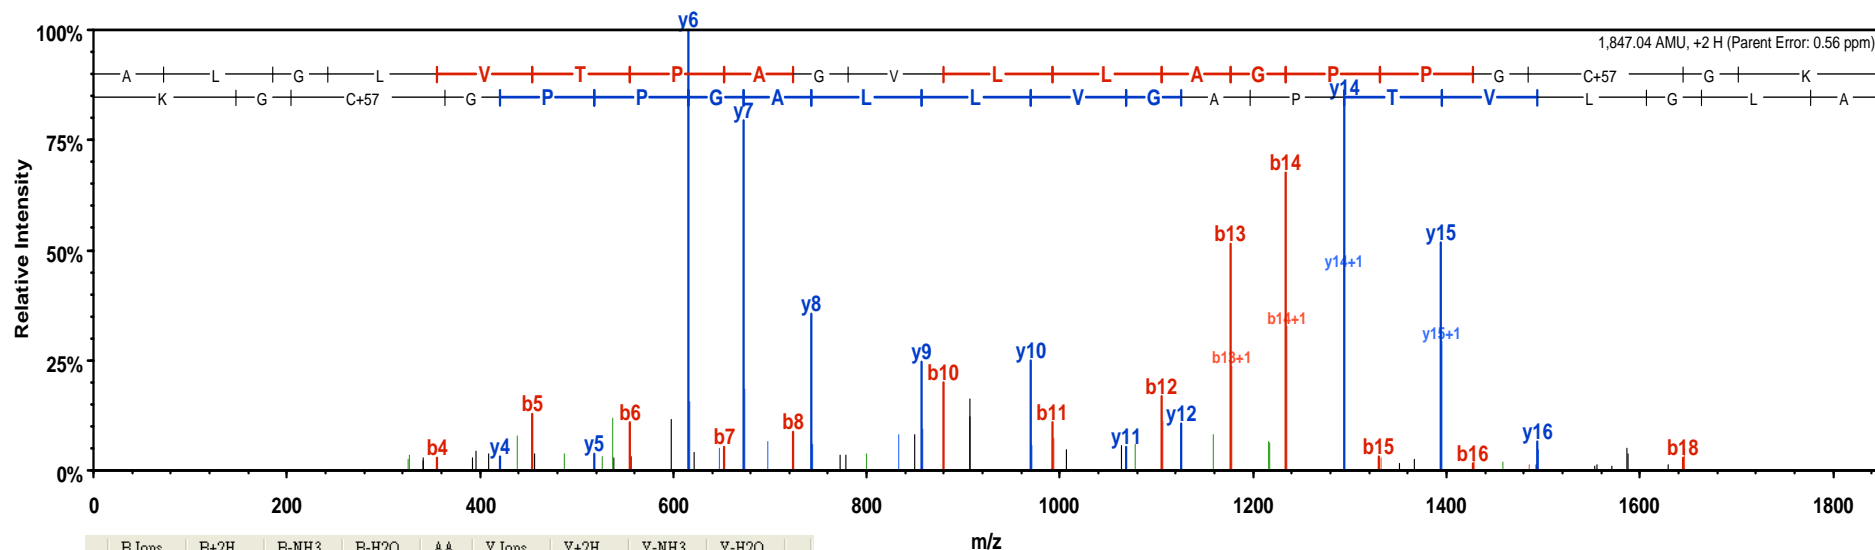

| ... | B Ions  | B+2H  | B-NH3   | B-H2O   | AA   | Y Ions  | Y+2H  | Y-NH3   | Y-H2O   | ... |
|-----|---------|-------|---------|---------|------|---------|-------|---------|---------|-----|
| 1   | 72.0    |       |         |         | A    | 1,848.0 | 924.5 | 1,831.0 | 1,830.0 | 20  |
| 2   | 185.1   |       |         |         | L    | 1,777.0 | 889.0 | 1,760.0 | 1,759.0 | 19  |
| 3   | 242.1   |       |         |         | G    | 1,663.9 | 832.5 | 1,646.9 | 1,645.9 | 18  |
| 4   | 355.2   |       |         |         | L    | 1,606.9 | 804.0 | 1,589.9 | 1,588.9 | 17  |
| 5   | 454.3   |       |         |         | V    | 1,493.8 | 747.4 | 1,476.8 | 1,475.8 | 16  |
| 6   | 555.4   | 278.2 |         | 537.3   | T    | 1,394.7 | 697.9 | 1,377.7 | 1,376.7 | 15  |
| 7   | 652.4   | 326.7 |         | 634.4   | P    | 1,293.7 | 647.4 | 1,276.7 |         | 14  |
| 8   | 723.4   | 362.2 |         | 705.4   | A    | 1,196.6 | 598.8 | 1,179.6 |         | 13  |
| 9   | 780.5   | 390.7 |         | 762.5   | G    | 1,125.6 | 563.3 | 1,108.6 |         | 12  |
| 10  | 879.5   | 440.3 |         | 861.5   | V    | 1,068.6 | 534.8 | 1,051.6 |         | 11  |
| 11  | 992.6   | 496.8 |         | 974.6   | L    | 969.5   | 485.3 | 952.5   |         | 10  |
| 12  | 1,105.7 | 553.4 |         | 1,087.7 | L    | 856.4   | 428.7 | 839.4   |         | 9   |
| 13  | 1,176.7 | 588.9 |         | 1,158.7 | A    | 743.4   | 372.2 | 726.3   |         | 8   |
| 14  | 1,233.8 | 617.4 |         | 1,215.7 | G    | 672.3   | 336.7 | 655.3   |         | 7   |
| 15  | 1,330.8 | 665.9 |         | 1,312.8 | P    | 615.3   | 308.1 | 598.3   |         | 6   |
| 16  | 1,427.9 | 714.4 |         | 1,409.9 | P    | 518.2   |       | 501.2   |         | 5   |
| 17  | 1,484.9 | 742.9 |         | 1,466.9 | G    | 421.2   |       | 404.2   |         | 4   |
| 18  | 1,644.9 | 823.0 |         | 1,626.9 | C+57 | 364.2   |       | 347.1   |         | 3   |
| 19  | 1,701.9 | 851.5 |         | 1,683.9 | G    | 204.1   |       | 187.1   |         | 2   |
| 20  | 1,848.0 | 924.5 | 1,831.0 | 1,830.0 | K    | 147.1   |       | 130.1   |         | 1   |

# Whole proteome

| Protein No. | Leading protein name | Sequence  | Mascot Score | Variable Modifications  | SILAC State | Charge | m/z       |
|-------------|----------------------|-----------|--------------|-------------------------|-------------|--------|-----------|
| W-66        | splQ96A72IMG2_HUMAN  | AVASDFYLR | 65           | Acetyl (Protein N-term) |             | 2      | 542.27711 |

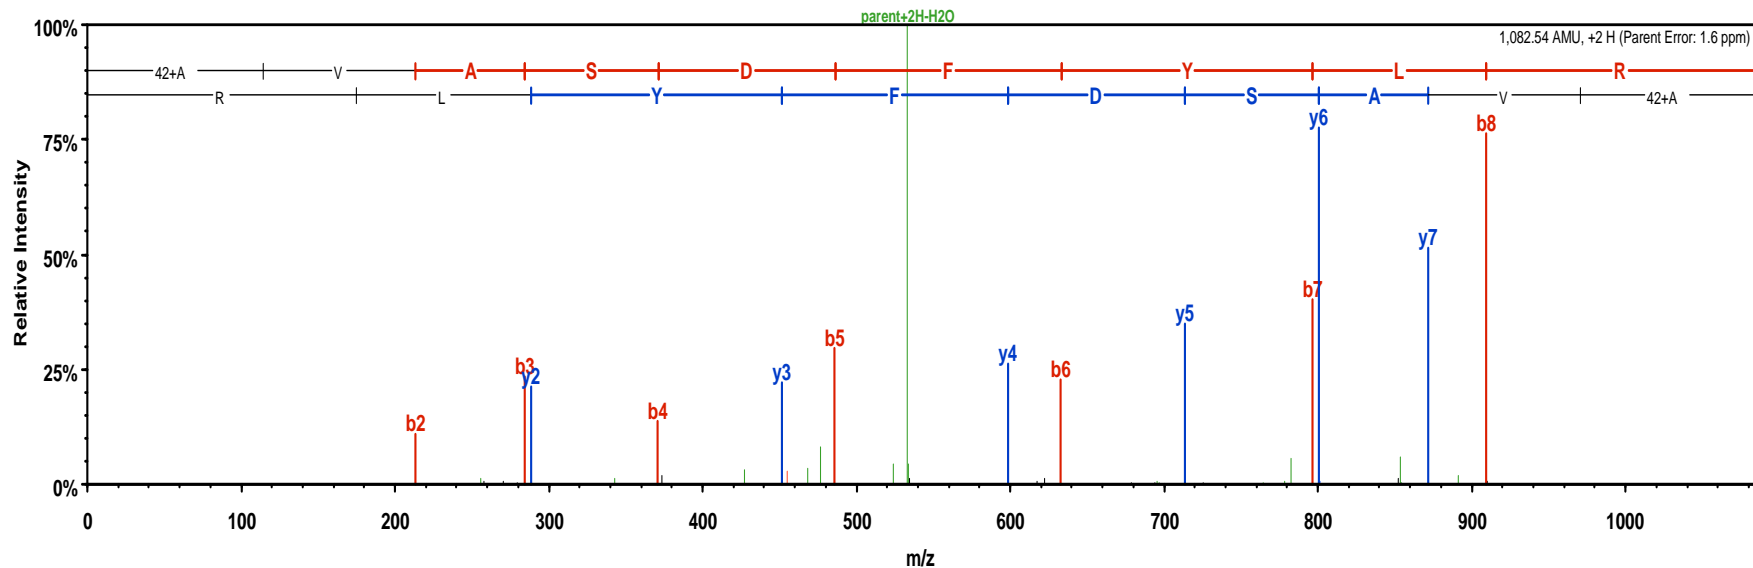

| ... | B Ions  | B+2H  | B-NH3   | B-H2O   | AA   | Y Ions  | Y+2H  | Y-NH3   | Y-H2O   | ... |
|-----|---------|-------|---------|---------|------|---------|-------|---------|---------|-----|
| 1   | 114.1   |       |         |         | A+42 | 1,083.5 | 542.3 | 1,066.5 | 1,065.5 | 9   |
| 2   | 213.1   |       |         |         | V    | 970.5   | 485.8 | 953.5   | 952.5   | 8   |
| 3   | 284.2   |       |         |         | A    | 871.4   | 436.2 | 854.4   | 853.4   | 7   |
| 4   | 371.2   |       |         | 353.2   | S    | 800.4   | 400.7 | 783.4   | 782.4   | 6   |
| 5   | 486.2   |       |         | 468.2   | D    | 713.4   |       | 696.3   | 695.4   | 5   |
| 6   | 633.3   | 317.1 |         | 615.3   | F    | 598.3   |       | 581.3   |         | 4   |
| 7   | 796.4   | 398.7 |         | 778.3   | Y    | 451.3   |       | 434.2   |         | 3   |
| 8   | 909.4   | 455.2 |         | 891.4   | L    | 288.2   |       | 271.2   |         | 2   |
| 9   | 1,083.5 | 542.3 | 1,066.5 | 1,065.5 | R    | 175.1   |       | 158.1   |         | 1   |

# Whole proteome

| Protein No. | Leading protein name  | Sequence       | Mascot Score | Variable Modifications | SILAC State | Charge | m/z       |
|-------------|-----------------------|----------------|--------------|------------------------|-------------|--------|-----------|
| W-67        | sp Q9NPI6 DCP1A_HUMAN | HLTVEELFGTSLPK | 63.36        | Unmodified             | Light       | 2      | 785.92741 |

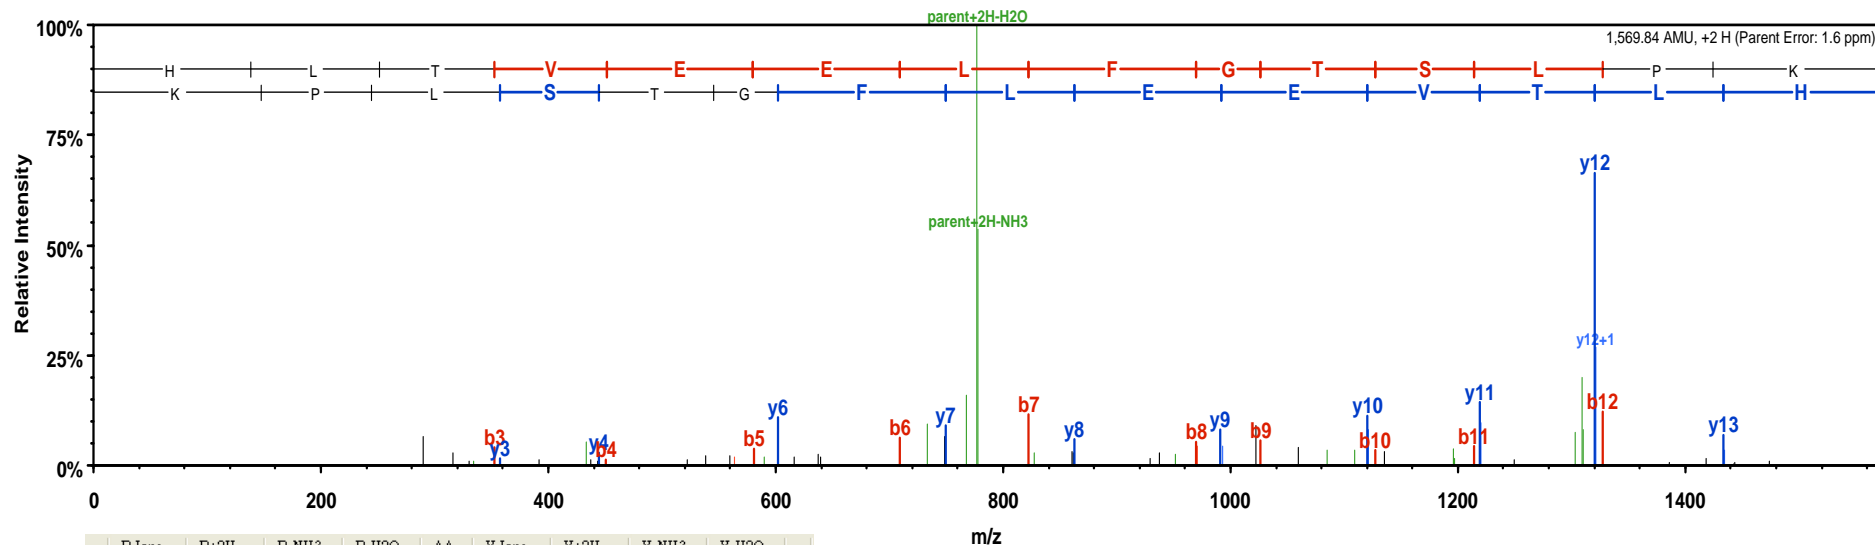

| ... | B Ions  | B+2H  | B-NH3   | B-H2O   | AA | Y Ions  | Y+2H  | Y-NH3   | Y-H2O   | ... |
|-----|---------|-------|---------|---------|----|---------|-------|---------|---------|-----|
| 1   | 138.1   | 69.5  |         |         | H  | 1,570.8 | 785.9 | 1,553.8 | 1,552.8 | 14  |
| 2   | 251.2   | 126.1 |         |         | L  | 1,433.8 | 717.4 | 1,416.8 | 1,415.8 | 13  |
| 3   | 352.2   | 176.6 |         | 334.2   | T  | 1,320.7 | 660.9 | 1,303.7 | 1,302.7 | 12  |
| 4   | 451.3   | 226.1 |         | 433.3   | V  | 1,219.7 | 610.3 | 1,202.6 | 1,201.6 | 11  |
| 5   | 580.3   | 290.7 |         | 562.3   | E  | 1,120.6 | 560.8 | 1,103.6 | 1,102.6 | 10  |
| 6   | 709.4   | 355.2 |         | 691.3   | E  | 991.5   | 496.3 | 974.5   | 973.5   | 9   |
| 7   | 822.4   | 411.7 |         | 804.4   | L  | 862.5   | 431.8 | 845.5   | 844.5   | 8   |
| 8   | 969.5   | 485.3 |         | 951.5   | F  | 749.4   | 375.2 | 732.4   | 731.4   | 7   |
| 9   | 1,026.5 | 513.8 |         | 1,008.5 | G  | 602.4   | 301.7 | 585.3   | 584.3   | 6   |
| 10  | 1,127.6 | 564.3 |         | 1,109.6 | T  | 545.3   |       | 528.3   | 527.3   | 5   |
| 11  | 1,214.6 | 607.8 |         | 1,196.6 | S  | 444.3   |       | 427.3   | 426.3   | 4   |
| 12  | 1,327.7 | 664.3 |         | 1,309.7 | L  | 357.2   |       | 340.2   |         | 3   |
| 13  | 1,424.7 | 712.9 |         | 1,406.7 | P  | 244.2   |       | 227.1   |         | 2   |
| 14  | 1,570.8 | 785.9 | 1,553.8 | 1,552.8 | K  | 147.1   |       | 130.1   |         | 1   |

# Whole proteome

| Protein No. | Leading protein name  | Sequence     | Mascot Score | Variable Modifications | SILAC State | Charge | m/z      |
|-------------|-----------------------|--------------|--------------|------------------------|-------------|--------|----------|
| W-68        | spIQ08170ISFRS4_HUMAN | NGYGFVEFDLDR | 62.78        | Unmodified             |             | 2      | 716.3306 |

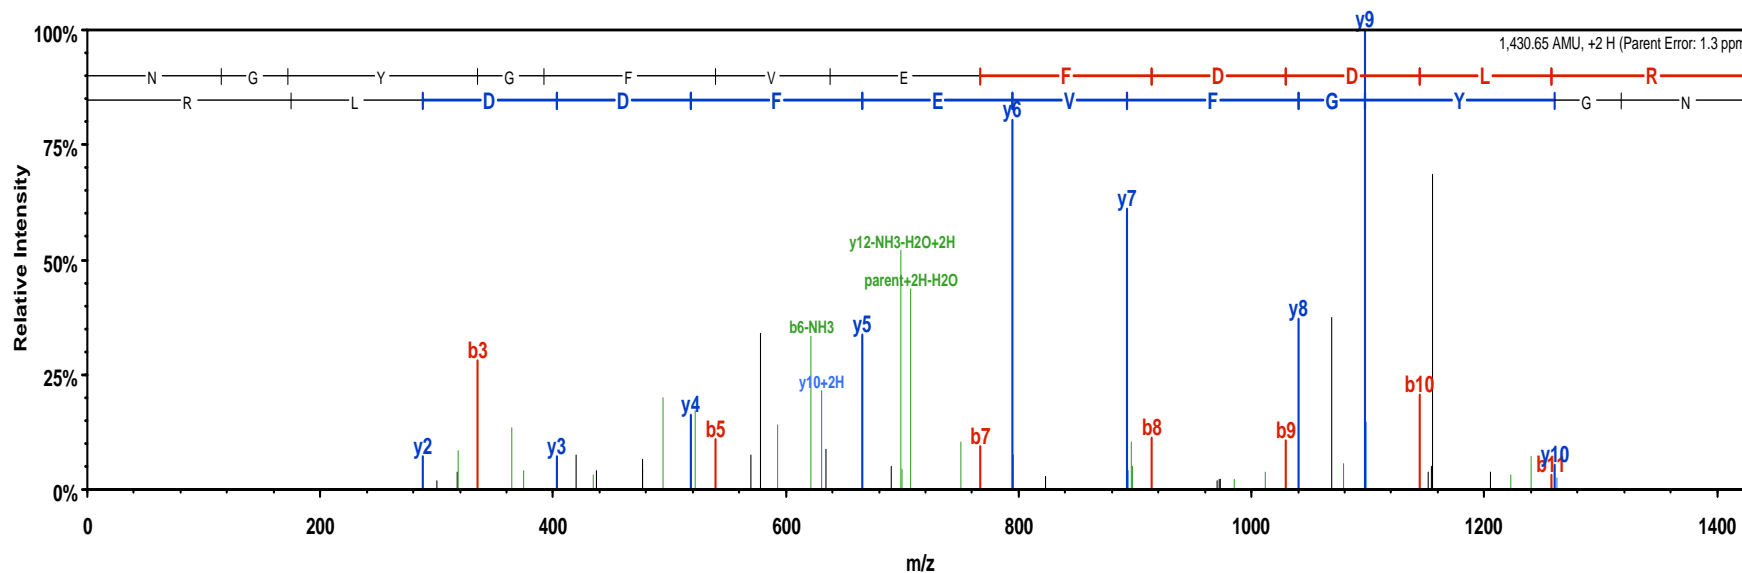

| ... | B Ions  | B+2H  | B-NH3   | B-H2O   | AA | Y Ions  | Y+2H  | Y-NH3   | Y-H2O   | ... |
|-----|---------|-------|---------|---------|----|---------|-------|---------|---------|-----|
| 1   | 115.1   |       | 98.0    |         | N  | 1,431.7 | 716.3 | 1,414.6 | 1,413.6 | 12  |
| 2   | 172.1   |       | 155.0   |         | G  | 1,317.6 | 659.3 | 1,300.6 | 1,299.6 | 11  |
| 3   | 335.1   |       | 318.1   |         | Y  | 1,260.6 | 630.8 | 1,243.6 | 1,242.6 | 10  |
| 4   | 392.2   |       | 375.1   |         | G  | 1,097.5 | 549.3 | 1,080.5 | 1,079.5 | 9   |
| 5   | 539.2   |       | 522.2   |         | F  | 1,040.5 | 520.8 | 1,023.5 | 1,022.5 | 8   |
| 6   | 638.3   | 319.7 | 621.3   |         | V  | 893.4   | 447.2 | 876.4   | 875.4   | 7   |
| 7   | 767.3   | 384.2 | 750.3   | 749.3   | E  | 794.4   | 397.7 | 777.3   | 776.4   | 6   |
| 8   | 914.4   | 457.7 | 897.4   | 896.4   | F  | 665.3   |       | 648.3   | 647.3   | 5   |
| 9   | 1,029.4 | 515.2 | 1,012.4 | 1,011.4 | D  | 518.3   |       | 501.2   | 500.2   | 4   |
| 10  | 1,144.5 | 572.7 | 1,127.4 | 1,126.4 | D  | 403.2   |       | 386.2   | 385.2   | 3   |
| 11  | 1,257.5 | 629.3 | 1,240.5 | 1,239.5 | L  | 288.2   |       | 271.2   |         | 2   |
| 12  | 1,431.7 | 716.3 | 1,414.6 | 1,413.6 | R  | 175.1   |       | 158.1   |         | 1   |

# Whole proteome

| Protein No. | Leading protein name   | Sequence           | Mascot Score | Variable Modifications | SILAC State | Charge | m/z       |
|-------------|------------------------|--------------------|--------------|------------------------|-------------|--------|-----------|
| W-69        | sp Q1ZZU3 ICI119_HUMAN | SGQADGTSEESLHLDIQK | 61.22        | Unmodified             | Light       | 2      | 957.95561 |

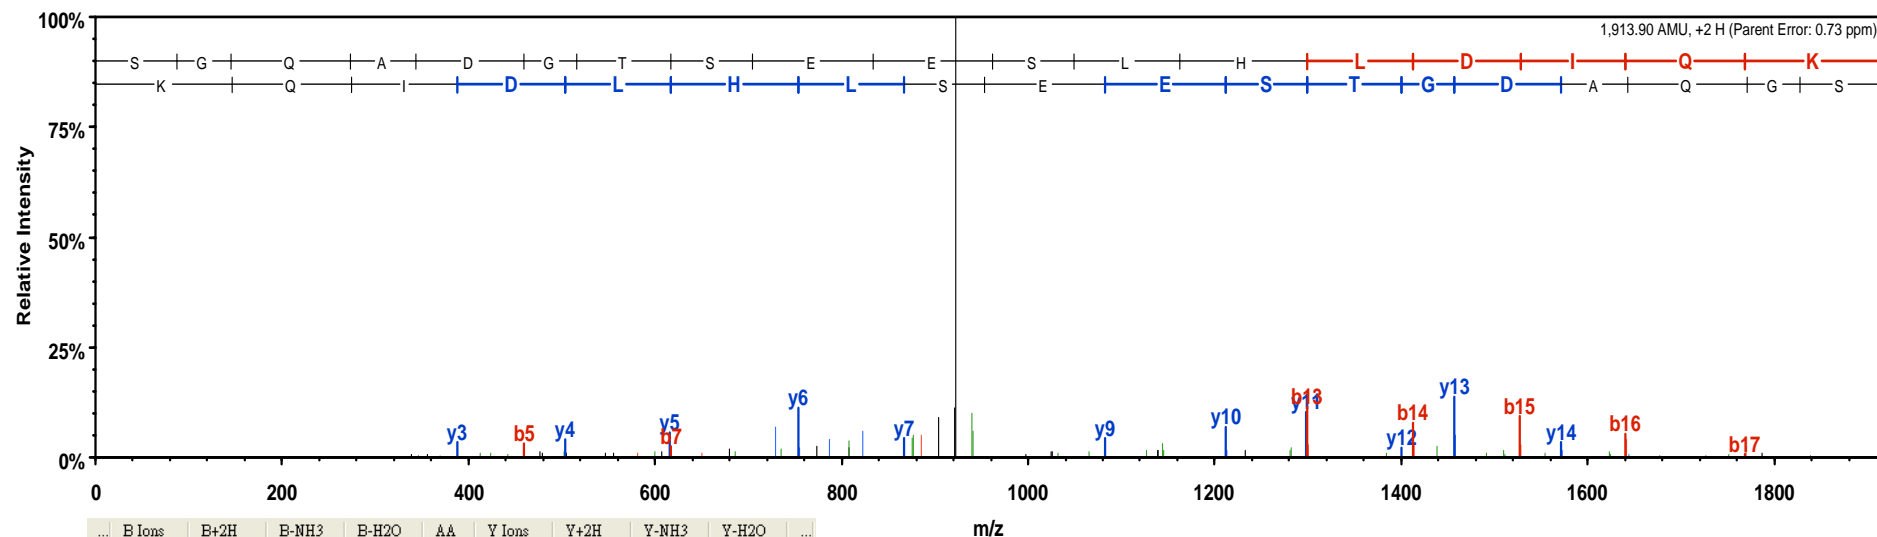

| ... | B Ions  | B+2H  | B-NH3   | B-H2O   | AA | Y Ions  | Y+2H  | Y-NH3   | Y-H2O   | ... |
|-----|---------|-------|---------|---------|----|---------|-------|---------|---------|-----|
| 1   | 88.0    |       |         | 70.0    | S  | 1,914.9 | 958.0 | 1,897.9 | 1,896.9 | 18  |
| 2   | 145.1   |       |         | 127.1   | G  | 1,827.9 | 914.4 | 1,810.8 | 1,809.9 | 17  |
| 3   | 273.1   |       | 256.1   | 255.1   | Q  | 1,770.9 | 885.9 | 1,753.8 | 1,752.8 | 16  |
| 4   | 344.2   |       | 327.1   | 326.1   | A  | 1,642.8 | 821.9 | 1,625.8 | 1,624.8 | 15  |
| 5   | 459.2   |       | 442.2   | 441.2   | D  | 1,571.8 | 786.4 | 1,554.7 | 1,553.7 | 14  |
| 6   | 516.2   | 258.6 | 499.2   | 498.2   | G  | 1,456.7 | 728.9 | 1,439.7 | 1,438.7 | 13  |
| 7   | 617.3   | 309.1 | 600.2   | 599.2   | T  | 1,399.7 | 700.4 | 1,382.7 | 1,381.7 | 12  |
| 8   | 704.3   | 352.6 | 687.3   | 686.3   | S  | 1,298.7 | 649.8 | 1,281.6 | 1,280.6 | 11  |
| 9   | 833.3   | 417.2 | 816.3   | 815.3   | E  | 1,211.6 | 606.3 | 1,194.6 | 1,193.6 | 10  |
| 10  | 962.4   | 481.7 | 945.3   | 944.4   | E  | 1,082.6 | 541.8 | 1,065.6 | 1,064.6 | 9   |
| 11  | 1,049.4 | 525.2 | 1,032.4 | 1,031.4 | S  | 953.5   | 477.3 | 936.5   | 935.5   | 8   |
| 12  | 1,162.5 | 581.7 | 1,145.5 | 1,144.5 | L  | 866.5   | 433.8 | 849.5   | 848.5   | 7   |
| 13  | 1,299.5 | 650.3 | 1,282.5 | 1,281.5 | H  | 753.4   | 377.2 | 736.4   | 735.4   | 6   |
| 14  | 1,412.6 | 706.8 | 1,395.6 | 1,394.6 | L  | 616.4   |       | 599.3   | 598.4   | 5   |
| 15  | 1,527.7 | 764.3 | 1,510.6 | 1,509.6 | D  | 503.3   |       | 486.3   | 485.3   | 4   |
| 16  | 1,640.7 | 820.9 | 1,623.7 | 1,622.7 | I  | 388.3   |       | 371.2   |         | 3   |
| 17  | 1,768.8 | 884.9 | 1,751.8 | 1,750.8 | Q  | 275.2   |       | 258.1   |         | 2   |
| 18  | 1,914.9 | 958.0 | 1,897.9 | 1,896.9 | K  | 147.1   |       | 130.1   |         | 1   |

# Whole proteome

| Protein No. | Leading protein name  | Sequence               | Mascot Score | Variable Modifications | SILAC State | Charge | m/z       |
|-------------|-----------------------|------------------------|--------------|------------------------|-------------|--------|-----------|
| W-70        | sp O00562 PITM1_HUMAN | GSELATDPPAQAAPSTTSEVVK | 61.15        | Unmodified             | Light       | 2      | 1127.0659 |

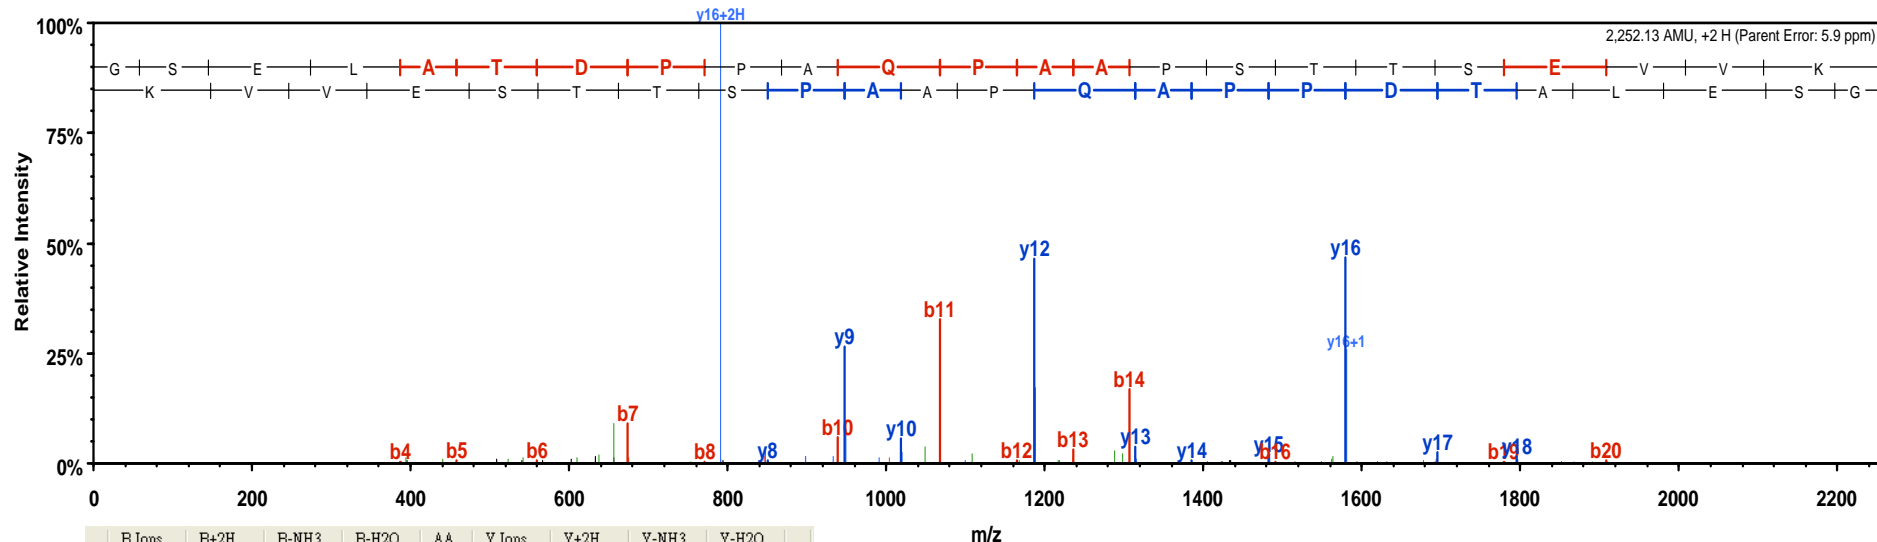

| ... | B Ions  | B+2H    | B-NH3   | B-H2O   | AA | Y Ions  | Y+2H    | Y-NH3   | Y-H2O   | ... |
|-----|---------|---------|---------|---------|----|---------|---------|---------|---------|-----|
| 1   | 58.0    |         |         |         | G  | 2,253.1 | 1,127.1 | 2,236.1 | 2,235.1 | 23  |
| 2   | 145.1   |         |         | 127.1   | S  | 2,196.1 | 1,098.6 | 2,179.1 | 2,178.1 | 22  |
| 3   | 274.1   |         |         | 256.1   | E  | 2,109.1 | 1,055.0 | 2,092.0 | 2,091.1 | 21  |
| 4   | 387.2   |         |         | 369.2   | L  | 1,980.0 | 990.5   | 1,963.0 | 1,962.0 | 20  |
| 5   | 458.2   |         |         | 440.2   | A  | 1,866.9 | 934.0   | 1,849.9 | 1,848.9 | 19  |
| 6   | 559.3   | 280.1   |         | 541.3   | T  | 1,795.9 | 898.5   | 1,778.9 | 1,777.9 | 18  |
| 7   | 674.3   | 337.7   |         | 656.3   | D  | 1,694.9 | 847.9   | 1,677.8 | 1,676.8 | 17  |
| 8   | 771.4   | 386.2   |         | 753.3   | P  | 1,579.8 | 790.4   | 1,562.8 | 1,561.8 | 16  |
| 9   | 868.4   | 434.7   |         | 850.4   | P  | 1,482.8 | 741.9   | 1,465.8 | 1,464.8 | 15  |
| 10  | 939.4   | 470.2   |         | 921.4   | A  | 1,385.7 | 693.4   | 1,368.7 | 1,367.7 | 14  |
| 11  | 1,067.5 | 534.3   | 1,050.5 | 1,049.5 | Q  | 1,314.7 | 657.8   | 1,297.7 | 1,296.7 | 13  |
| 12  | 1,164.6 | 582.8   | 1,147.5 | 1,146.5 | P  | 1,186.6 | 593.8   | 1,169.6 | 1,168.6 | 12  |
| 13  | 1,235.6 | 618.3   | 1,218.6 | 1,217.6 | A  | 1,089.6 | 545.3   | 1,072.6 | 1,071.6 | 11  |
| 14  | 1,306.6 | 653.8   | 1,289.6 | 1,288.6 | A  | 1,018.5 | 509.8   | 1,001.5 | 1,000.5 | 10  |
| 15  | 1,403.7 | 702.3   | 1,386.7 | 1,385.7 | P  | 947.5   | 474.3   | 930.5   | 929.5   | 9   |
| 16  | 1,490.7 | 745.9   | 1,473.7 | 1,472.7 | S  | 850.5   | 425.7   | 833.4   | 832.4   | 8   |
| 17  | 1,591.8 | 796.4   | 1,574.7 | 1,573.7 | T  | 763.4   | 382.2   | 746.4   | 745.4   | 7   |
| 18  | 1,692.8 | 846.9   | 1,675.8 | 1,674.8 | T  | 662.4   | 331.7   | 645.3   | 644.4   | 6   |
| 19  | 1,779.8 | 890.4   | 1,762.8 | 1,761.8 | S  | 561.3   |         | 544.3   | 543.3   | 5   |
| 20  | 1,908.9 | 954.9   | 1,891.9 | 1,890.9 | E  | 474.3   |         | 457.3   | 456.3   | 4   |
| 21  | 2,008.0 | 1,004.5 | 1,990.9 | 1,989.9 | V  | 345.2   |         | 328.2   |         | 3   |
| 22  | 2,107.0 | 1,054.0 | 2,090.0 | 2,089.0 | V  | 246.2   |         | 229.2   |         | 2   |
| 23  | 2,253.1 | 1,127.1 | 2,236.1 | 2,235.1 | K  | 147.1   |         | 130.1   |         | 1   |

# Whole proteome

| Protein No. | Leading protein name  | Sequence                   | Mascot Score | Variable Modifications | SILAC State | Charge | m/z       |
|-------------|-----------------------|----------------------------|--------------|------------------------|-------------|--------|-----------|
| W-71        | splQ99442ISEC62_HUMAN | EELEQQTGDGDCEEDEEEENDGETPK | 61.13        | Unmodified             | Heavy       | 2      | 1477.5598 |

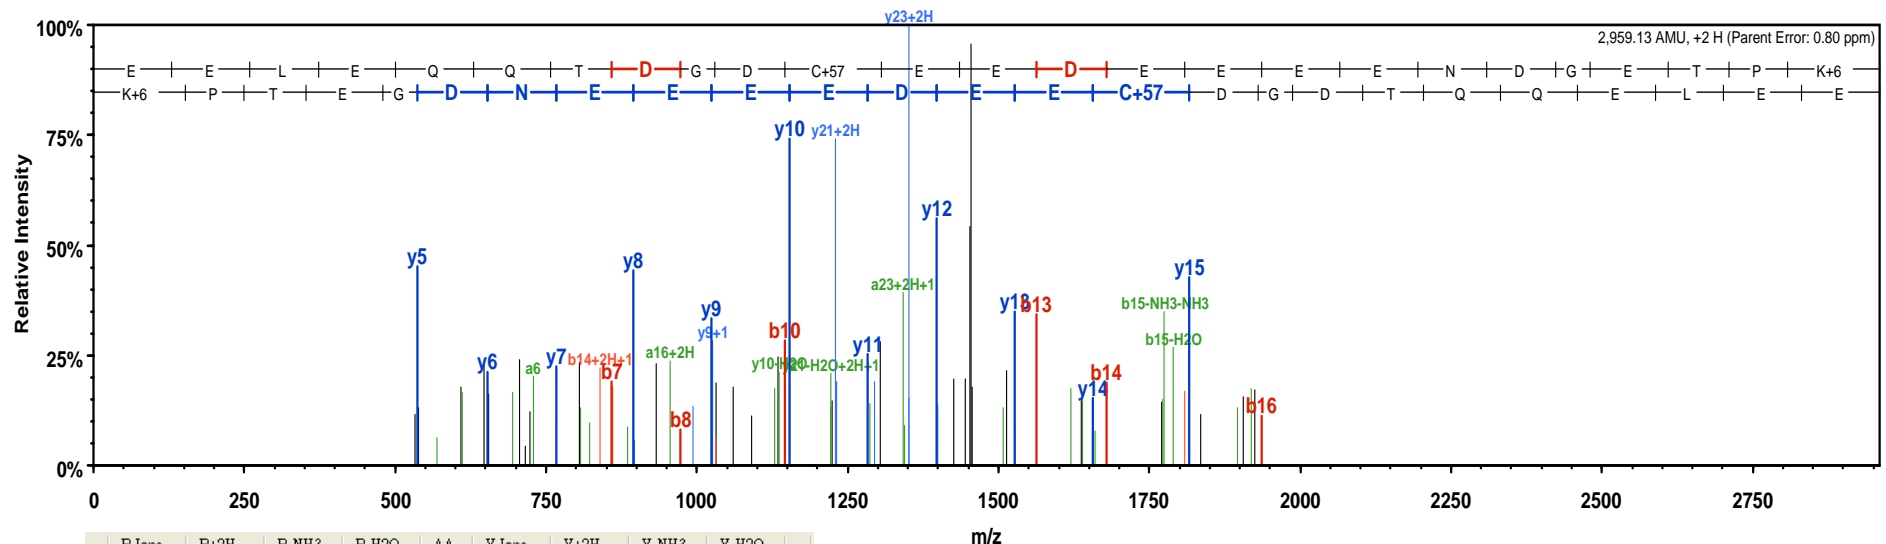

| ... | E Ions  | B+2H    | B-NH3   | B-H2O   | AA   | Y Ions  | Y+2H    | Y-NH3   | Y-H2O   | ... |
|-----|---------|---------|---------|---------|------|---------|---------|---------|---------|-----|
| 1   | 130.0   |         |         | 112.0   | E    | 2,960.1 | 1,480.6 | 2,943.1 | 2,942.1 | 25  |
| 2   | 259.1   |         |         | 241.1   | E    | 2,831.1 | 1,416.0 | 2,814.1 | 2,813.1 | 24  |
| 3   | 372.2   |         |         | 354.2   | L    | 2,702.0 | 1,351.5 | 2,685.0 | 2,684.0 | 23  |
| 4   | 501.2   |         |         | 483.2   | E    | 2,589.0 | 1,295.0 | 2,571.9 | 2,571.0 | 22  |
| 5   | 629.3   |         | 612.3   | 611.3   | Q    | 2,459.9 | 1,230.5 | 2,442.9 | 2,441.9 | 21  |
| 6   | 757.3   | 379.2   | 740.3   | 739.3   | Q    | 2,331.9 | 1,166.4 | 2,314.8 | 2,313.9 | 20  |
| 7   | 858.4   | 429.7   | 841.4   | 840.4   | T    | 2,203.8 | 1,102.4 | 2,186.8 | 2,185.8 | 19  |
| 8   | 973.4   | 487.2   | 956.4   | 955.4   | D    | 2,102.8 | 1,051.9 | 2,085.7 | 2,084.7 | 18  |
| 9   | 1,030.4 | 515.7   | 1,013.4 | 1,012.4 | G    | 1,987.7 | 994.4   | 1,970.7 | 1,969.7 | 17  |
| 10  | 1,145.5 | 573.2   | 1,128.4 | 1,127.4 | D    | 1,930.7 | 965.9   | 1,913.7 | 1,912.7 | 16  |
| 11  | 1,305.5 | 653.2   | 1,288.5 | 1,287.5 | C+57 | 1,815.7 | 908.3   | 1,798.7 | 1,797.7 | 15  |
| 12  | 1,434.5 | 717.8   | 1,417.5 | 1,416.5 | E    | 1,655.7 | 828.3   | 1,638.6 | 1,637.6 | 14  |
| 13  | 1,563.6 | 782.3   | 1,546.5 | 1,545.6 | E    | 1,526.6 | 763.8   | 1,509.6 | 1,508.6 | 13  |
| 14  | 1,678.6 | 839.8   | 1,661.6 | 1,660.6 | D    | 1,397.6 | 699.3   | 1,380.5 | 1,379.6 | 12  |
| 15  | 1,807.6 | 904.3   | 1,790.6 | 1,789.6 | E    | 1,282.5 | 641.8   | 1,265.5 | 1,264.5 | 11  |
| 16  | 1,936.7 | 968.8   | 1,919.7 | 1,918.7 | E    | 1,153.5 | 577.3   | 1,136.5 | 1,135.5 | 10  |
| 17  | 2,065.7 | 1,033.4 | 2,048.7 | 2,047.7 | E    | 1,024.5 | 512.7   | 1,007.4 | 1,006.4 | 9   |
| 18  | 2,194.8 | 1,097.9 | 2,177.7 | 2,176.8 | E    | 895.4   | 448.2   | 878.4   | 877.4   | 8   |
| 19  | 2,308.8 | 1,154.9 | 2,291.8 | 2,290.8 | N    | 766.4   | 383.7   | 749.3   | 748.4   | 7   |
| 20  | 2,423.8 | 1,212.4 | 2,406.8 | 2,405.8 | D    | 652.3   | 326.7   | 635.3   | 634.3   | 6   |
| 21  | 2,480.9 | 1,240.9 | 2,463.8 | 2,462.9 | G    | 537.3   |         | 520.3   | 519.3   | 5   |
| 22  | 2,609.9 | 1,305.5 | 2,592.9 | 2,591.9 | E    | 480.3   |         | 463.2   | 462.3   | 4   |
| 23  | 2,711.0 | 1,356.0 | 2,693.9 | 2,692.9 | T    | 351.2   |         | 334.2   | 333.2   | 3   |
| 24  | 2,808.0 | 1,404.5 | 2,791.0 | 2,790.0 | P    | 250.2   |         | 233.2   |         | 2   |
| 25  | 2,960.1 | 1,480.6 | 2,943.1 | 2,942.1 | K+6  | 153.1   |         | 136.1   |         | 1   |



# Whole proteome

| Protein No. | Leading protein name | Sequence               | Mascot Score | Variable Modifications | SILAC State | Charge | m/z       |
|-------------|----------------------|------------------------|--------------|------------------------|-------------|--------|-----------|
| W-72        | spIQ96FJ2IDYL2_HUMAN | NADMSEDMQQDAVDCATQAMEK | 61.11        | Unmodified             | Light       | 3      | 829.99588 |

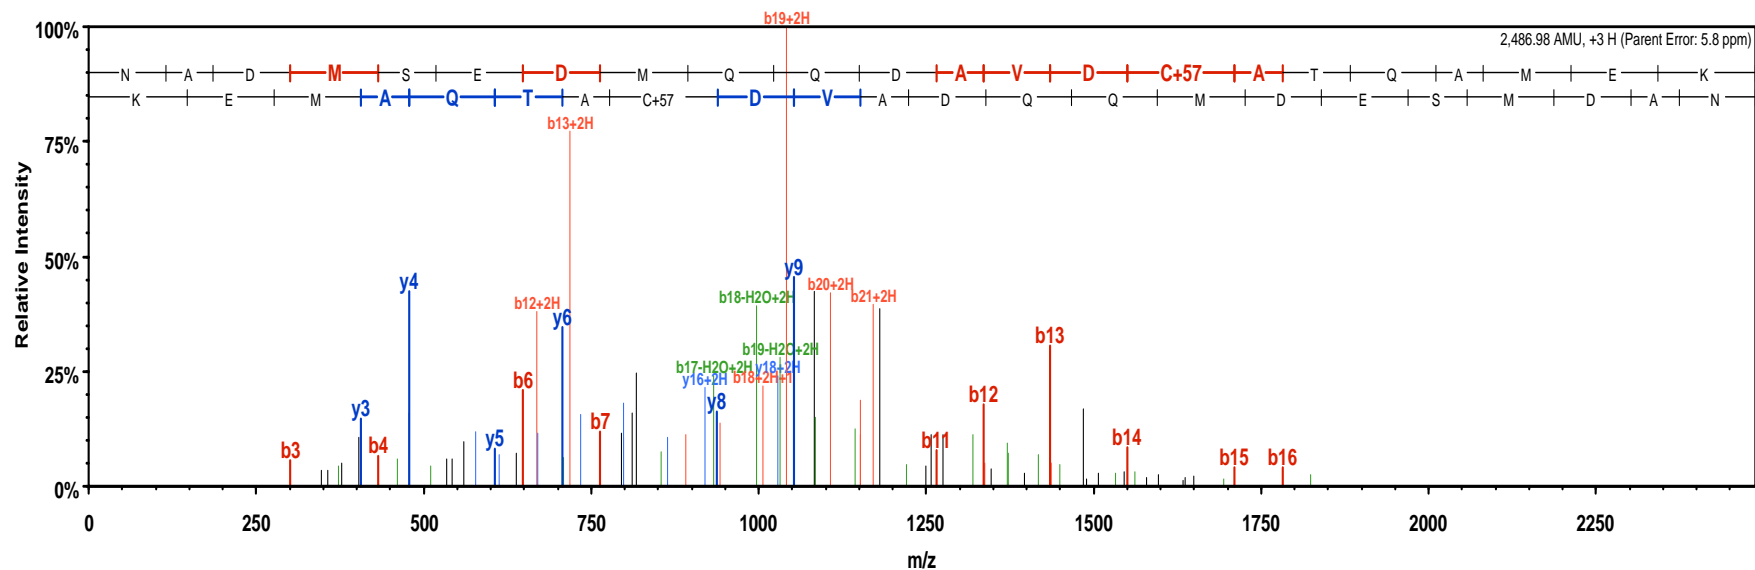

| ... | B Ions  | B+2H    | B-NH3   | B-H2O   | AA   | Y Ions  | Y+2H    | Y-NH3   | Y-H2O   | ... |
|-----|---------|---------|---------|---------|------|---------|---------|---------|---------|-----|
| 1   | 115.1   |         | 98.0    |         | N    | 2,488.0 | 1,244.5 | 2,470.9 | 2,470.0 | 22  |
| 2   | 186.1   |         | 169.1   |         | A    | 2,373.9 | 1,187.5 | 2,356.9 | 2,355.9 | 21  |
| 3   | 301.1   |         | 284.1   | 283.1   | D    | 2,302.9 | 1,152.0 | 2,285.9 | 2,284.9 | 20  |
| 4   | 432.2   |         | 415.1   | 414.1   | M    | 2,187.9 | 1,094.4 | 2,170.8 | 2,169.9 | 19  |
| 5   | 519.2   |         | 502.2   | 501.2   | S    | 2,056.8 | 1,028.9 | 2,039.8 | 2,038.8 | 18  |
| 6   | 648.2   | 324.6   | 631.2   | 630.2   | E    | 1,969.8 | 985.4   | 1,952.8 | 1,951.8 | 17  |
| 7   | 763.3   | 382.1   | 746.2   | 745.2   | D    | 1,840.8 | 920.9   | 1,823.7 | 1,822.7 | 16  |
| 8   | 894.3   | 447.7   | 877.3   | 876.3   | M    | 1,725.7 | 863.4   | 1,708.7 | 1,707.7 | 15  |
| 9   | 1,022.4 | 511.7   | 1,005.3 | 1,004.3 | Q    | 1,594.7 | 797.8   | 1,577.7 | 1,576.7 | 14  |
| 10  | 1,150.4 | 575.7   | 1,133.4 | 1,132.4 | Q    | 1,466.6 | 733.8   | 1,449.6 | 1,448.6 | 13  |
| 11  | 1,265.4 | 633.2   | 1,248.4 | 1,247.4 | D    | 1,338.6 | 669.8   | 1,321.5 | 1,320.6 | 12  |
| 12  | 1,336.5 | 668.7   | 1,319.5 | 1,318.5 | A    | 1,223.5 | 612.3   | 1,206.5 | 1,205.5 | 11  |
| 13  | 1,435.5 | 718.3   | 1,418.5 | 1,417.5 | V    | 1,152.5 | 576.8   | 1,135.5 | 1,134.5 | 10  |
| 14  | 1,550.6 | 775.8   | 1,533.5 | 1,532.6 | D    | 1,053.4 | 527.2   | 1,036.4 | 1,035.4 | 9   |
| 15  | 1,710.6 | 855.8   | 1,693.6 | 1,692.6 | C+57 | 938.4   | 469.7   | 921.4   | 920.4   | 8   |
| 16  | 1,781.6 | 891.3   | 1,764.6 | 1,763.6 | A    | 778.4   | 389.7   | 761.3   | 760.4   | 7   |
| 17  | 1,882.7 | 941.8   | 1,865.7 | 1,864.7 | T    | 707.3   | 354.2   | 690.3   | 689.3   | 6   |
| 18  | 2,010.7 | 1,005.9 | 1,993.7 | 1,992.7 | Q    | 606.3   |         | 589.3   | 588.3   | 5   |
| 19  | 2,081.8 | 1,041.4 | 2,064.8 | 2,063.8 | A    | 478.2   |         | 461.2   | 460.2   | 4   |
| 20  | 2,212.8 | 1,106.9 | 2,195.8 | 2,194.8 | M    | 407.2   |         | 390.2   | 389.2   | 3   |
| 21  | 2,341.9 | 1,171.4 | 2,324.8 | 2,323.9 | E    | 276.2   |         | 259.1   | 258.1   | 2   |
| 22  | 2,488.0 | 1,244.5 | 2,470.9 | 2,470.0 | K    | 147.1   |         | 130.1   |         | 1   |

# Whole proteome

| Protein No. | Leading protein name   | Sequence         | Mascot Score | Variable Modifications   | SILAC State | Charge | m/z       |
|-------------|------------------------|------------------|--------------|--------------------------|-------------|--------|-----------|
| W-73        | sp P56556 INDUA6_HUMAN | QATSTASTFVKPIFSR | 60.94        | Gln->pyro-Glu (N-term Q) | Heavy       | 2      | 862.45432 |

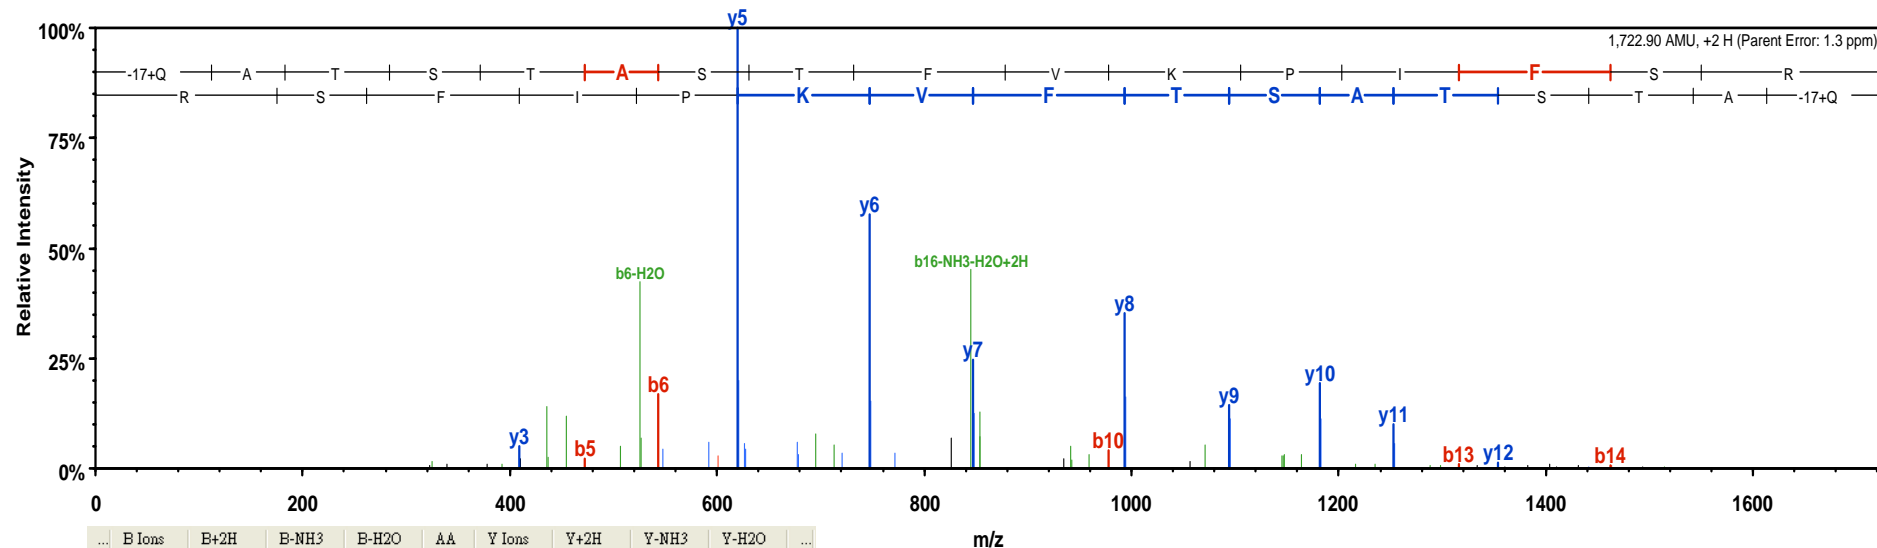

| ... | B Ions  | B+2H  | B-NH3   | B-H2O   | AA   | Y Ions  | Y+2H  | Y-NH3   | Y-H2O   | ... |
|-----|---------|-------|---------|---------|------|---------|-------|---------|---------|-----|
| 1   | 112.0   |       | 95.0    |         | Q-17 | 1,723.9 | 862.5 | 1,706.9 | 1,705.9 | 16  |
| 2   | 183.1   |       | 166.0   |         | A    | 1,612.9 | 806.9 | 1,595.8 | 1,594.9 | 15  |
| 3   | 284.1   |       | 267.1   | 266.1   | T    | 1,541.8 | 771.4 | 1,524.8 | 1,523.8 | 14  |
| 4   | 371.2   |       | 354.1   | 353.1   | S    | 1,440.8 | 720.9 | 1,423.8 | 1,422.8 | 13  |
| 5   | 472.2   |       | 455.2   | 454.2   | T    | 1,353.8 | 677.4 | 1,336.7 | 1,335.7 | 12  |
| 6   | 543.2   | 272.1 | 526.2   | 525.2   | A    | 1,252.7 | 626.9 | 1,235.7 | 1,234.7 | 11  |
| 7   | 630.3   | 315.6 | 613.2   | 612.3   | S    | 1,181.7 | 591.3 | 1,164.6 | 1,163.7 | 10  |
| 8   | 731.3   | 366.2 | 714.3   | 713.3   | T    | 1,094.6 | 547.8 | 1,077.6 | 1,076.6 | 9   |
| 9   | 878.4   | 439.7 | 861.4   | 860.4   | F    | 993.6   | 497.3 | 976.6   | 975.6   | 8   |
| 10  | 977.5   | 489.2 | 960.4   | 959.4   | V    | 846.5   | 423.8 | 829.5   | 828.5   | 7   |
| 11  | 1,105.6 | 553.3 | 1,088.5 | 1,087.5 | K    | 747.5   | 374.2 | 730.4   | 729.4   | 6   |
| 12  | 1,202.6 | 601.8 | 1,185.6 | 1,184.6 | P    | 619.4   |       | 602.3   | 601.3   | 5   |
| 13  | 1,315.7 | 658.3 | 1,298.7 | 1,297.7 | I    | 522.3   |       | 505.3   | 504.3   | 4   |
| 14  | 1,462.8 | 731.9 | 1,445.7 | 1,444.7 | F    | 409.2   |       | 392.2   | 391.2   | 3   |
| 15  | 1,549.8 | 775.4 | 1,532.8 | 1,531.8 | S    | 262.2   |       | 245.1   | 244.1   | 2   |
| 16  | 1,723.9 | 862.5 | 1,706.9 | 1,705.9 | R    | 175.1   |       | 158.1   |         | 1   |

# Whole proteome

| Protein No. | Leading protein name  | Sequence       | Mascot Score | Variable Modifications   | SILAC State | Charge | m/z       |
|-------------|-----------------------|----------------|--------------|--------------------------|-------------|--------|-----------|
| W-74        | spIP61020IRAB5B_HUMAN | QASPSIVIALAGNK | 59.34        | Gln->pyro-Glu (N-term Q) | Heavy       | 2      | 676.38263 |

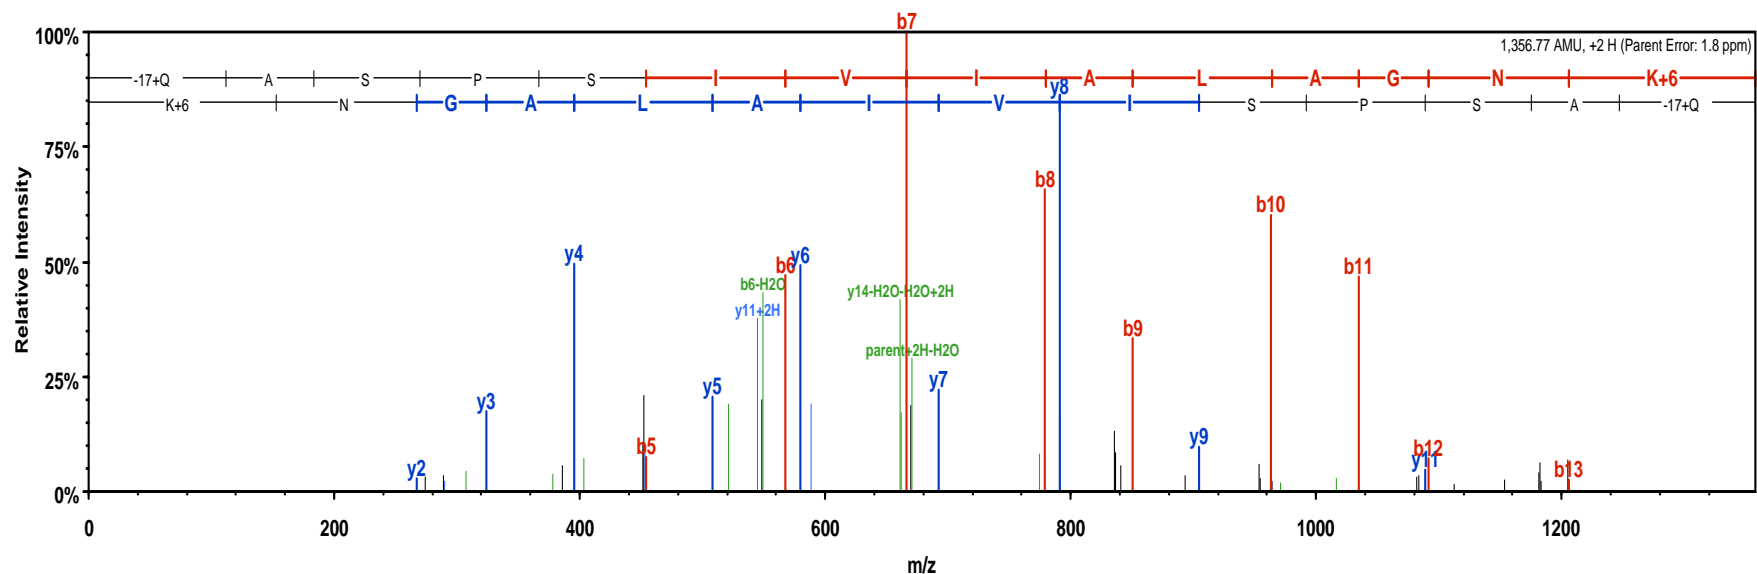

| ... | B Ions  | B+2H  | B-NH3   | B-H2O   | AA   | Y Ions  | Y+2H  | Y-NH3   | Y-H2O   | ... |
|-----|---------|-------|---------|---------|------|---------|-------|---------|---------|-----|
| 1   | 112.0   |       | 95.0    |         | Q-17 | 1,357.8 | 679.4 | 1,340.8 | 1,339.8 | 14  |
| 2   | 183.1   |       | 166.0   |         | A    | 1,246.7 | 623.9 | 1,229.7 | 1,228.7 | 13  |
| 3   | 270.1   |       | 253.1   | 252.1   | S    | 1,175.7 | 588.4 | 1,158.7 | 1,157.7 | 12  |
| 4   | 367.2   |       | 350.1   | 349.2   | P    | 1,088.7 | 544.8 | 1,071.7 | 1,070.7 | 11  |
| 5   | 454.2   |       | 437.2   | 436.2   | S    | 991.6   | 496.3 | 974.6   | 973.6   | 10  |
| 6   | 567.3   | 284.1 | 550.3   | 549.3   | I    | 904.6   | 452.8 | 887.6   |         | 9   |
| 7   | 666.3   | 333.7 | 649.3   | 648.3   | V    | 791.5   | 396.3 | 774.5   |         | 8   |
| 8   | 779.4   | 390.2 | 762.4   | 761.4   | I    | 692.4   | 346.7 | 675.4   |         | 7   |
| 9   | 850.5   | 425.7 | 833.4   | 832.5   | A    | 579.4   | 290.2 | 562.3   |         | 6   |
| 10  | 963.6   | 482.3 | 946.5   | 945.5   | L    | 508.3   |       | 491.3   |         | 5   |
| 11  | 1,034.6 | 517.8 | 1,017.6 | 1,016.6 | A    | 395.2   |       | 378.2   |         | 4   |
| 12  | 1,091.6 | 546.3 | 1,074.6 | 1,073.6 | G    | 324.2   |       | 307.2   |         | 3   |
| 13  | 1,205.7 | 603.3 | 1,188.6 | 1,187.6 | N    | 267.2   |       | 250.1   |         | 2   |
| 14  | 1,357.8 | 679.4 | 1,340.8 | 1,339.8 | K+6  | 153.1   |       | 136.1   |         | 1   |

# Whole proteome

| Protein No. | Leading protein name   | Sequence        | Mascot Score | Variable Modifications | SILAC State | Charge | m/z       |
|-------------|------------------------|-----------------|--------------|------------------------|-------------|--------|-----------|
| W-75        | sp O43181 INDUS4_HUMAN | LDITTLTGVP EEHK | 59.17        | Unmodified             | Light       | 2      | 833.45653 |

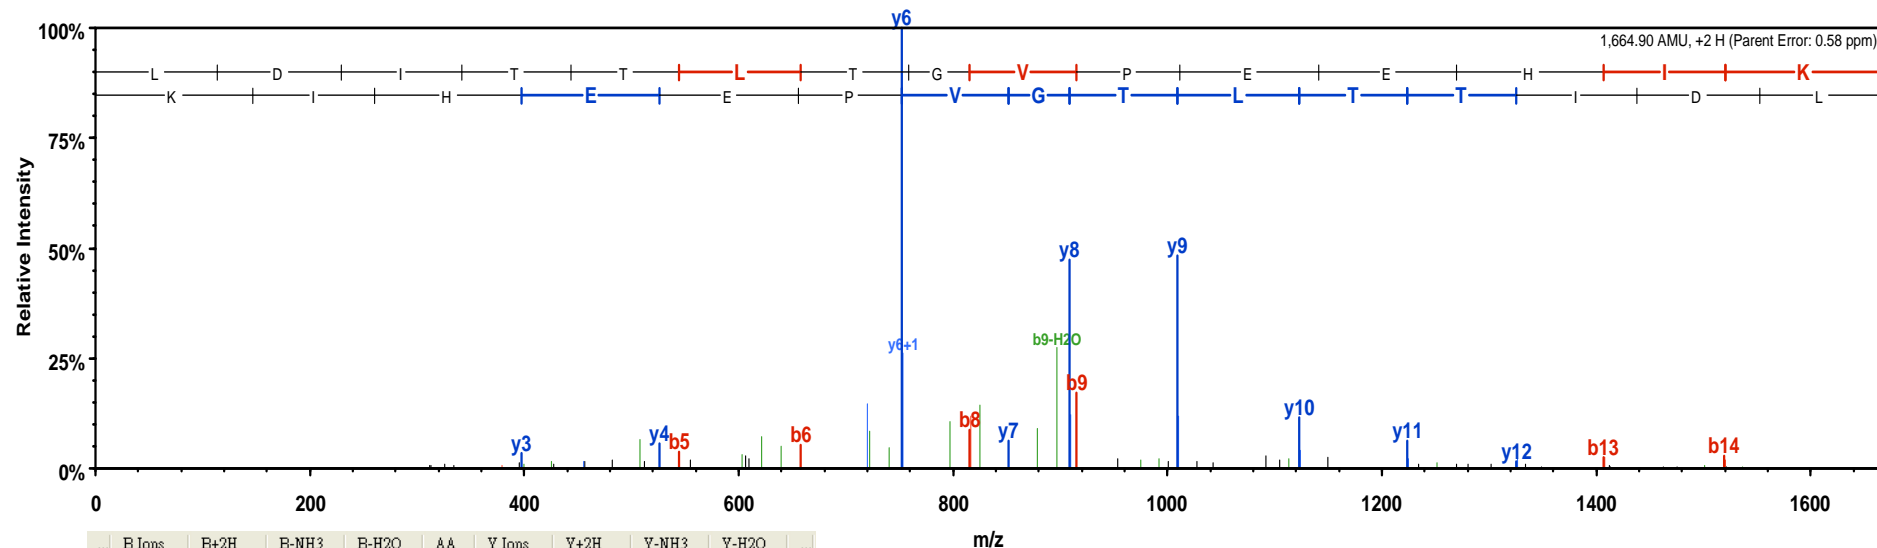

| ... | B Ions  | B+2H  | B-NH3   | B-H2O   | AA | Y Ions  | Y+2H  | Y-NH3   | Y-H2O   | ... |
|-----|---------|-------|---------|---------|----|---------|-------|---------|---------|-----|
| 1   | 114.1   |       |         |         | L  | 1,665.9 | 833.5 | 1,648.9 | 1,647.9 | 15  |
| 2   | 229.1   |       |         | 211.1   | D  | 1,552.8 | 776.9 | 1,535.8 | 1,534.8 | 14  |
| 3   | 342.2   |       |         | 324.2   | I  | 1,437.8 | 719.4 | 1,420.8 | 1,419.8 | 13  |
| 4   | 443.3   |       |         | 425.2   | T  | 1,324.7 | 662.9 | 1,307.7 | 1,306.7 | 12  |
| 5   | 544.3   |       |         | 526.3   | T  | 1,223.7 | 612.3 | 1,206.6 | 1,205.7 | 11  |
| 6   | 657.4   | 329.2 |         | 639.4   | L  | 1,122.6 | 561.8 | 1,105.6 | 1,104.6 | 10  |
| 7   | 758.4   | 379.7 |         | 740.4   | T  | 1,009.5 | 505.3 | 992.5   | 991.5   | 9   |
| 8   | 815.5   | 408.2 |         | 797.4   | G  | 908.5   | 454.7 | 891.5   | 890.5   | 8   |
| 9   | 914.5   | 457.8 |         | 896.5   | V  | 851.5   | 426.2 | 834.4   | 833.5   | 7   |
| 10  | 1,011.6 | 506.3 |         | 993.6   | P  | 752.4   | 376.7 | 735.4   | 734.4   | 6   |
| 11  | 1,140.6 | 570.8 |         | 1,122.6 | E  | 655.3   | 328.2 | 638.3   | 637.3   | 5   |
| 12  | 1,269.7 | 635.3 |         | 1,251.6 | E  | 526.3   | 263.7 | 509.3   | 508.3   | 4   |
| 13  | 1,406.7 | 703.9 |         | 1,388.7 | H  | 397.3   | 199.1 | 380.2   |         | 3   |
| 14  | 1,519.8 | 760.4 |         | 1,501.8 | I  | 260.2   |       | 243.2   |         | 2   |
| 15  | 1,665.9 | 833.5 | 1,648.9 | 1,647.9 | K  | 147.1   |       | 130.1   |         | 1   |

# Whole proteome

| Protein No. | Leading protein name  | Sequence                      | Mascot Score | Variable Modifications | SILAC State | Charge | m/z       |
|-------------|-----------------------|-------------------------------|--------------|------------------------|-------------|--------|-----------|
| W-76        | sp Q9P289 IMST4_HUMAN | IIDLEEADEIEDIQEITVLSQCDSSYVTK | 59.17        | Unmodified             | Light       | 3      | 1204.9047 |

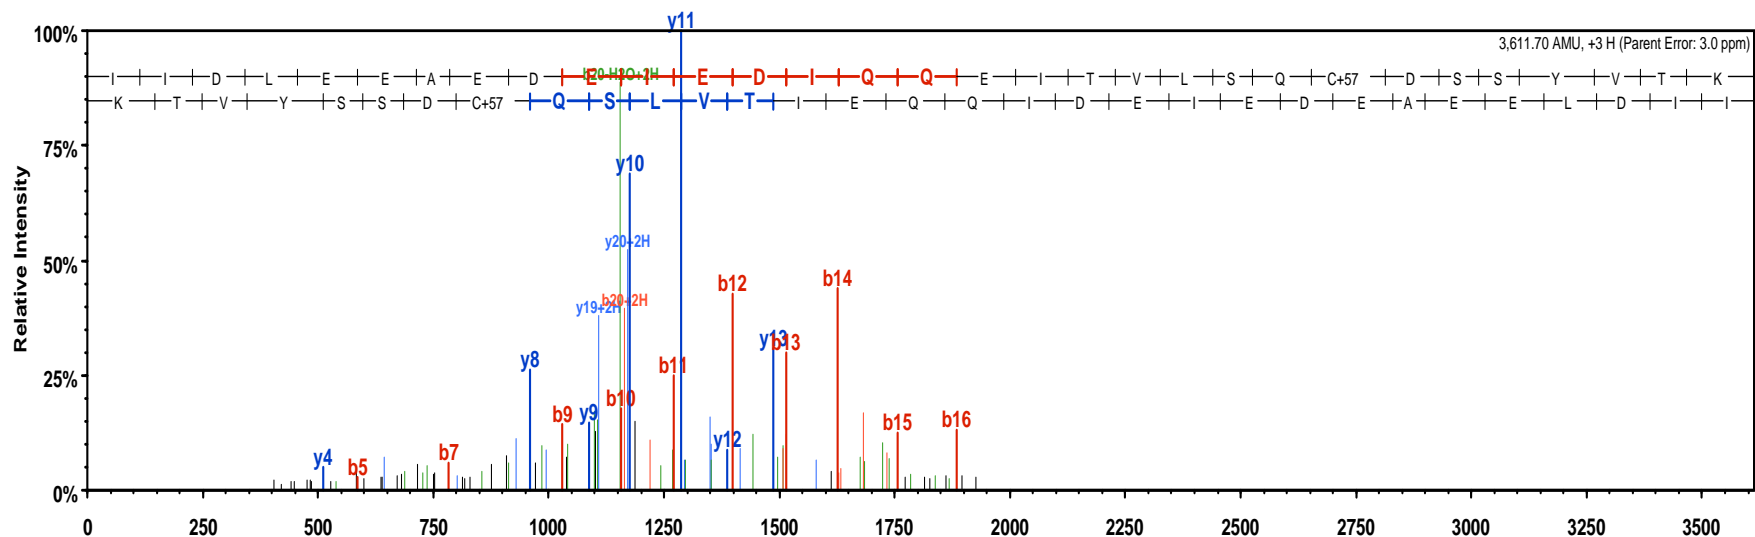

| ... | B Ions  | E+2H    | B-NH3   | B-H2O   | AA   | Y Ions  | Y+2H    | Y-NH3   | Y-H2O   | ... |
|-----|---------|---------|---------|---------|------|---------|---------|---------|---------|-----|
| 1   | 114.1   |         |         |         | I    | 3,612.7 | 1,806.9 | 3,595.7 | 3,594.7 | 31  |
| 2   | 227.2   |         |         |         | I    | 3,499.6 | 1,750.3 | 3,482.6 | 3,481.6 | 30  |
| 3   | 342.2   |         |         | 324.2   | D    | 3,386.5 | 1,693.8 | 3,369.5 | 3,368.5 | 29  |
| 4   | 455.3   |         |         | 437.3   | L    | 3,271.5 | 1,636.3 | 3,254.5 | 3,253.5 | 28  |
| 5   | 584.3   |         |         | 566.3   | E    | 3,158.4 | 1,579.7 | 3,141.4 | 3,140.4 | 27  |
| 6   | 713.4   | 357.2   |         | 695.4   | E    | 3,029.4 | 1,515.2 | 3,012.4 | 3,011.4 | 26  |
| 7   | 784.4   | 392.7   |         | 766.4   | A    | 2,900.3 | 1,450.7 | 2,883.3 | 2,882.3 | 25  |
| 8   | 913.5   | 457.2   |         | 895.4   | E    | 2,829.3 | 1,415.2 | 2,812.3 | 2,811.3 | 24  |
| 9   | 1,028.5 | 514.7   |         | 1,010.5 | D    | 2,700.3 | 1,350.6 | 2,683.2 | 2,682.2 | 23  |
| 10  | 1,157.5 | 579.3   |         | 1,139.5 | E    | 2,585.2 | 1,293.1 | 2,568.2 | 2,567.2 | 22  |
| 11  | 1,270.6 | 635.8   |         | 1,252.6 | I    | 2,456.2 | 1,228.6 | 2,439.2 | 2,438.2 | 21  |
| 12  | 1,399.6 | 700.3   |         | 1,381.6 | E    | 2,343.1 | 1,172.1 | 2,326.1 | 2,325.1 | 20  |
| 13  | 1,514.7 | 757.8   |         | 1,496.7 | D    | 2,214.1 | 1,107.5 | 2,197.0 | 2,196.0 | 19  |
| 14  | 1,627.8 | 814.4   |         | 1,609.7 | I    | 2,099.0 | 1,050.0 | 2,082.0 | 2,081.0 | 18  |
| 15  | 1,755.8 | 878.4   | 1,738.8 | 1,737.8 | Q    | 1,985.9 | 993.5   | 1,968.9 | 1,967.9 | 17  |
| 16  | 1,883.9 | 942.4   | 1,866.8 | 1,865.9 | Q    | 1,857.9 | 929.4   | 1,840.9 | 1,839.9 | 16  |
| 17  | 2,012.9 | 1,007.0 | 1,995.9 | 1,994.9 | E    | 1,729.8 | 865.4   | 1,712.8 | 1,711.8 | 15  |
| 18  | 2,126.0 | 1,063.5 | 2,109.0 | 2,108.0 | I    | 1,600.8 | 800.9   | 1,583.8 | 1,582.8 | 14  |
| 19  | 2,227.1 | 1,114.0 | 2,210.0 | 2,209.0 | T    | 1,487.7 | 744.4   | 1,470.7 | 1,469.7 | 13  |
| 20  | 2,326.1 | 1,163.6 | 2,309.1 | 2,308.1 | V    | 1,386.7 | 693.8   | 1,369.6 | 1,368.6 | 12  |
| 21  | 2,439.2 | 1,220.1 | 2,422.2 | 2,421.2 | L    | 1,287.6 | 644.3   | 1,270.6 | 1,269.6 | 11  |
| 22  | 2,526.2 | 1,263.6 | 2,509.2 | 2,508.2 | S    | 1,174.5 | 587.8   | 1,157.5 | 1,156.5 | 10  |
| 23  | 2,654.3 | 1,327.7 | 2,637.3 | 2,636.3 | Q    | 1,087.5 | 544.2   | 1,070.4 | 1,069.5 | 9   |
| 24  | 2,814.3 | 1,407.7 | 2,797.3 | 2,796.3 | C+57 | 959.4   | 480.2   | 942.4   | 941.4   | 8   |
| 25  | 2,929.4 | 1,465.2 | 2,912.3 | 2,911.3 | D    | 799.4   | 400.2   | 782.4   | 781.4   | 7   |
| 26  | 3,016.4 | 1,508.7 | 2,999.4 | 2,998.4 | S    | 684.4   | 342.7   | 667.3   | 666.3   | 6   |
| 27  | 3,103.4 | 1,552.2 | 3,086.4 | 3,085.4 | S    | 597.3   |         | 580.3   | 579.3   | 5   |
| 28  | 3,266.5 | 1,633.7 | 3,249.5 | 3,248.5 | V    | 510.3   |         | 493.3   | 492.3   | 4   |
| 29  | 3,365.5 | 1,683.3 | 3,348.5 | 3,347.5 | V    | 347.2   |         | 330.2   | 329.2   | 3   |
| 30  | 3,466.6 | 1,733.8 | 3,449.6 | 3,448.6 | T    | 248.2   |         | 231.1   | 230.1   | 2   |
| 31  | 3,612.7 | 1,806.9 | 3,595.7 | 3,594.7 | K    | 147.1   |         | 130.1   |         | 1   |

# Whole proteome

| Protein No. | Leading protein name  | Sequence        | Mascot Score | Variable Modifications | SILAC State | Charge | m/z       |
|-------------|-----------------------|-----------------|--------------|------------------------|-------------|--------|-----------|
| W-77        | sp Q9Y680 FKBP7_HUMAN | KGDLLNAHYDGYLAK | 58.69        | Unmodified             | Heavy       | 2      | 839.43339 |

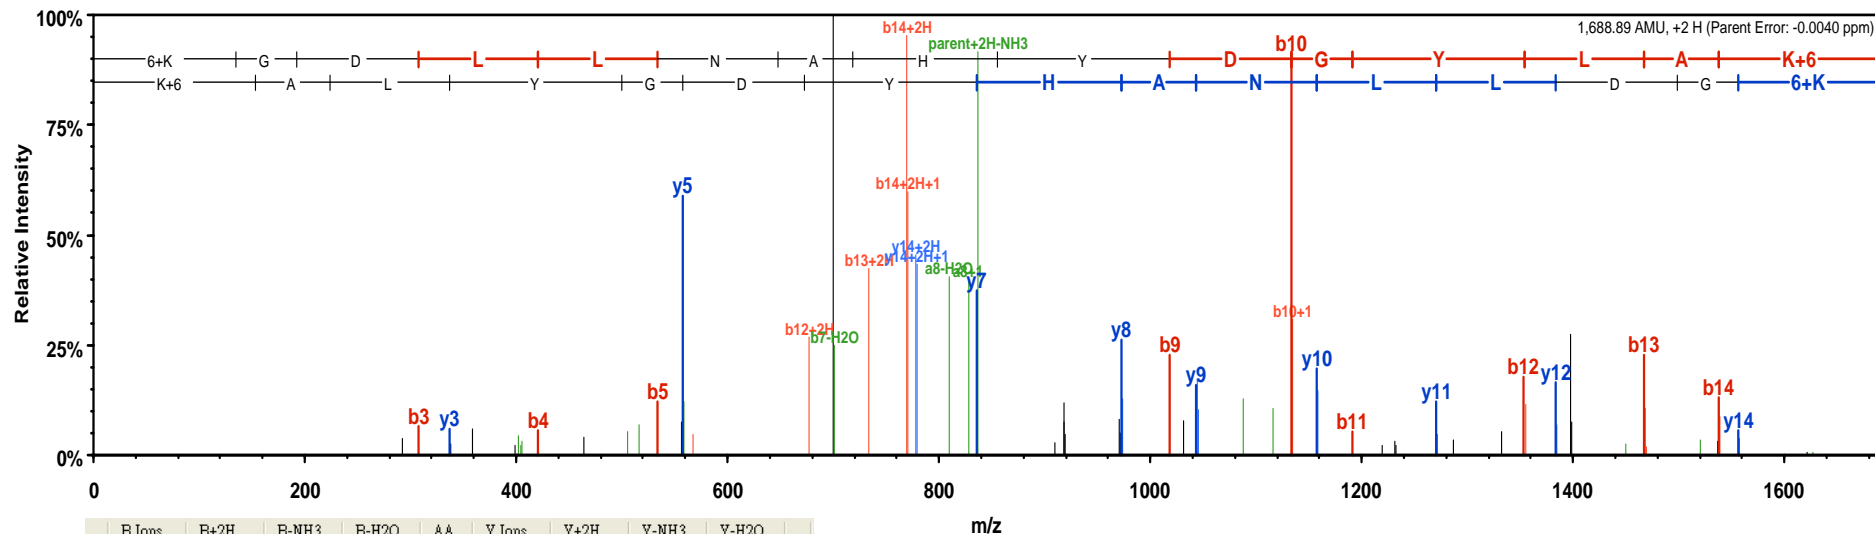

| ... | B Ions  | B+2H  | B-NH3   | B-H2O   | AA  | Y Ions  | Y+2H  | Y-NH3   | Y-H2O   | ... |
|-----|---------|-------|---------|---------|-----|---------|-------|---------|---------|-----|
| 1   | 135.1   | 68.1  | 118.1   |         | K+6 | 1,689.9 | 845.5 | 1,672.9 | 1,671.9 | 15  |
| 2   | 192.1   | 96.6  | 175.1   |         | G   | 1,555.8 | 778.4 | 1,538.8 | 1,537.8 | 14  |
| 3   | 307.2   | 154.1 | 290.1   | 289.2   | D   | 1,498.8 | 749.9 | 1,481.7 | 1,480.8 | 13  |
| 4   | 420.3   | 210.6 | 403.2   | 402.2   | L   | 1,383.7 | 692.4 | 1,366.7 | 1,365.7 | 12  |
| 5   | 533.3   | 267.2 | 516.3   | 515.3   | L   | 1,270.7 | 635.8 | 1,253.6 | 1,252.6 | 11  |
| 6   | 647.4   | 324.2 | 630.4   | 629.4   | N   | 1,157.6 | 579.3 | 1,140.5 | 1,139.6 | 10  |
| 7   | 718.4   | 359.7 | 701.4   | 700.4   | A   | 1,043.5 | 522.3 | 1,026.5 | 1,025.5 | 9   |
| 8   | 855.5   | 428.2 | 838.5   | 837.5   | H   | 972.5   | 486.7 | 955.5   | 954.5   | 8   |
| 9   | 1,018.5 | 509.8 | 1,001.5 | 1,000.5 | Y   | 835.4   | 418.2 | 818.4   | 817.4   | 7   |
| 10  | 1,133.6 | 567.3 | 1,116.5 | 1,115.6 | D   | 672.4   | 336.7 | 655.3   | 654.4   | 6   |
| 11  | 1,190.6 | 595.8 | 1,173.6 | 1,172.6 | G   | 557.3   |       | 540.3   |         | 5   |
| 12  | 1,353.7 | 677.3 | 1,336.6 | 1,335.6 | Y   | 500.3   |       | 483.3   |         | 4   |
| 13  | 1,466.7 | 733.9 | 1,449.7 | 1,448.7 | L   | 337.3   |       | 320.2   |         | 3   |
| 14  | 1,537.8 | 769.4 | 1,520.7 | 1,519.8 | A   | 224.2   |       | 207.1   |         | 2   |
| 15  | 1,689.9 | 845.5 | 1,672.9 | 1,671.9 | K+6 | 153.1   |       | 136.1   |         | 1   |

# Whole proteome

| Protein No. | Leading protein name  | Sequence          | Mascot Score | Variable Modifications   | SILAC State | Charge | m/z       |
|-------------|-----------------------|-------------------|--------------|--------------------------|-------------|--------|-----------|
| W-78        | spIP43362IMAGA9_HUMAN | QVPGSDPAHYEFLWGSK | 58.24        | Gln->pyro-Glu (N-term Q) | Light       | 2      | 950.94686 |

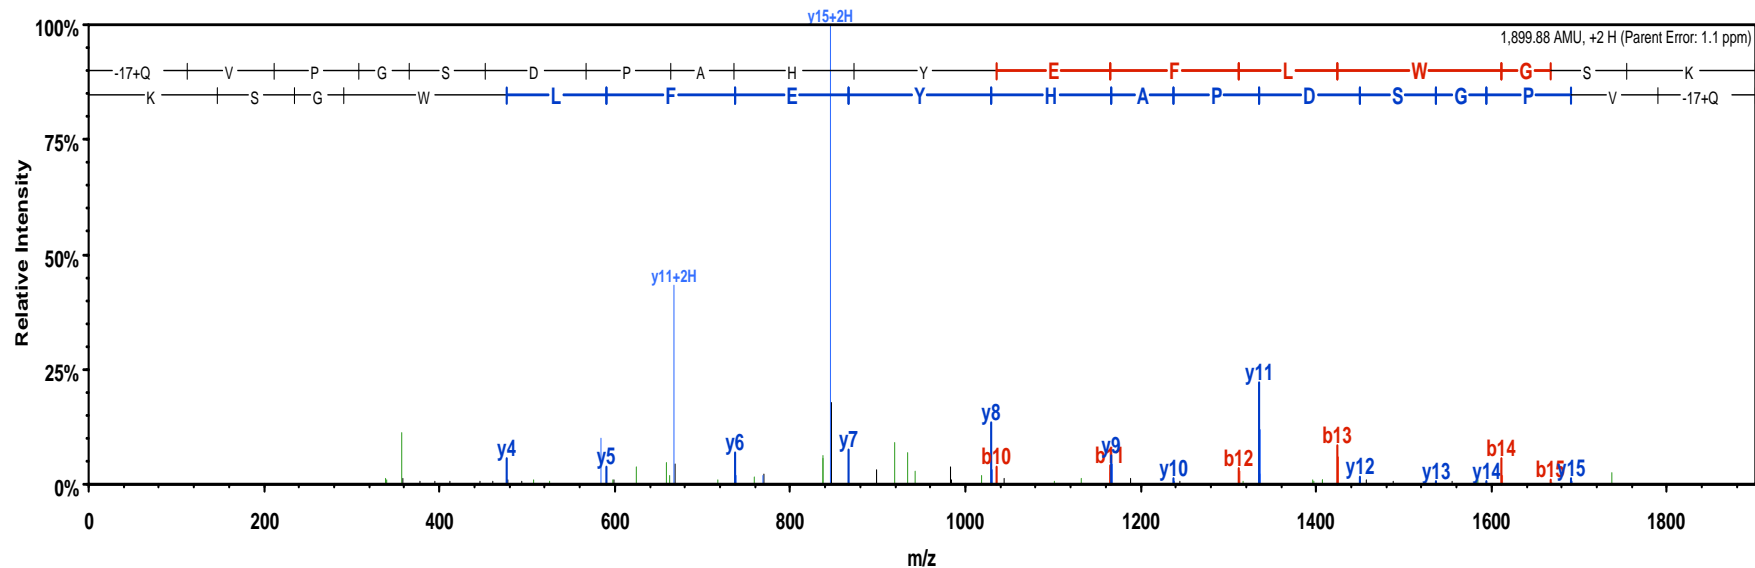

| ... | B Ions  | B+2H  | B-NH3   | B-H2O   | AA   | Y Ions  | Y+2H  | Y-NH3   | Y-H2O   | ... |
|-----|---------|-------|---------|---------|------|---------|-------|---------|---------|-----|
| 1   | 112.0   |       | 95.0    |         | Q-17 | 1,900.9 | 950.9 | 1,883.9 | 1,882.9 | 17  |
| 2   | 211.1   |       | 194.1   |         | V    | 1,789.9 | 895.4 | 1,772.8 | 1,771.8 | 16  |
| 3   | 308.2   |       | 291.1   |         | P    | 1,690.8 | 845.9 | 1,673.8 | 1,672.8 | 15  |
| 4   | 365.2   |       | 348.2   |         | G    | 1,593.7 | 797.4 | 1,576.7 | 1,575.7 | 14  |
| 5   | 452.2   |       | 435.2   | 434.2   | S    | 1,536.7 | 768.9 | 1,519.7 | 1,518.7 | 13  |
| 6   | 567.2   | 284.1 | 550.2   | 549.2   | D    | 1,449.7 | 725.3 | 1,432.7 | 1,431.7 | 12  |
| 7   | 664.3   | 332.7 | 647.3   | 646.3   | P    | 1,334.7 | 667.8 | 1,317.6 | 1,316.6 | 11  |
| 8   | 735.3   | 368.2 | 718.3   | 717.3   | A    | 1,237.6 | 619.3 | 1,220.6 | 1,219.6 | 10  |
| 9   | 872.4   | 436.7 | 855.4   | 854.4   | H    | 1,166.6 | 583.8 | 1,149.5 | 1,148.6 | 9   |
| 10  | 1,035.5 | 518.2 | 1,018.4 | 1,017.4 | V    | 1,029.5 | 515.3 | 1,012.5 | 1,011.5 | 8   |
| 11  | 1,164.5 | 582.8 | 1,147.5 | 1,146.5 | E    | 866.4   | 433.7 | 849.4   | 848.4   | 7   |
| 12  | 1,311.6 | 656.3 | 1,294.5 | 1,293.6 | F    | 737.4   | 369.2 | 720.4   | 719.4   | 6   |
| 13  | 1,424.6 | 712.8 | 1,407.6 | 1,406.6 | L    | 590.3   |       | 573.3   | 572.3   | 5   |
| 14  | 1,610.7 | 805.9 | 1,593.7 | 1,592.7 | W    | 477.2   |       | 460.2   | 459.2   | 4   |
| 15  | 1,667.7 | 834.4 | 1,650.7 | 1,649.7 | G    | 291.2   |       | 274.1   | 273.2   | 3   |
| 16  | 1,754.8 | 877.9 | 1,737.8 | 1,736.8 | S    | 234.1   |       | 217.1   | 216.1   | 2   |
| 17  | 1,900.9 | 950.9 | 1,883.9 | 1,882.9 | K    | 147.1   |       | 130.1   |         | 1   |

# Whole proteome

| Protein No. | Leading protein name   | Sequence    | Mascot Score | Variable Modifications  | SILAC State | Charge | m/z       |
|-------------|------------------------|-------------|--------------|-------------------------|-------------|--------|-----------|
| W-79        | sp Q9N9YF3 FA53C_HUMAN | MITLITEQLQK | 58.11        | Acetyl (Protein N-term) | Light       | 2      | 680.38125 |

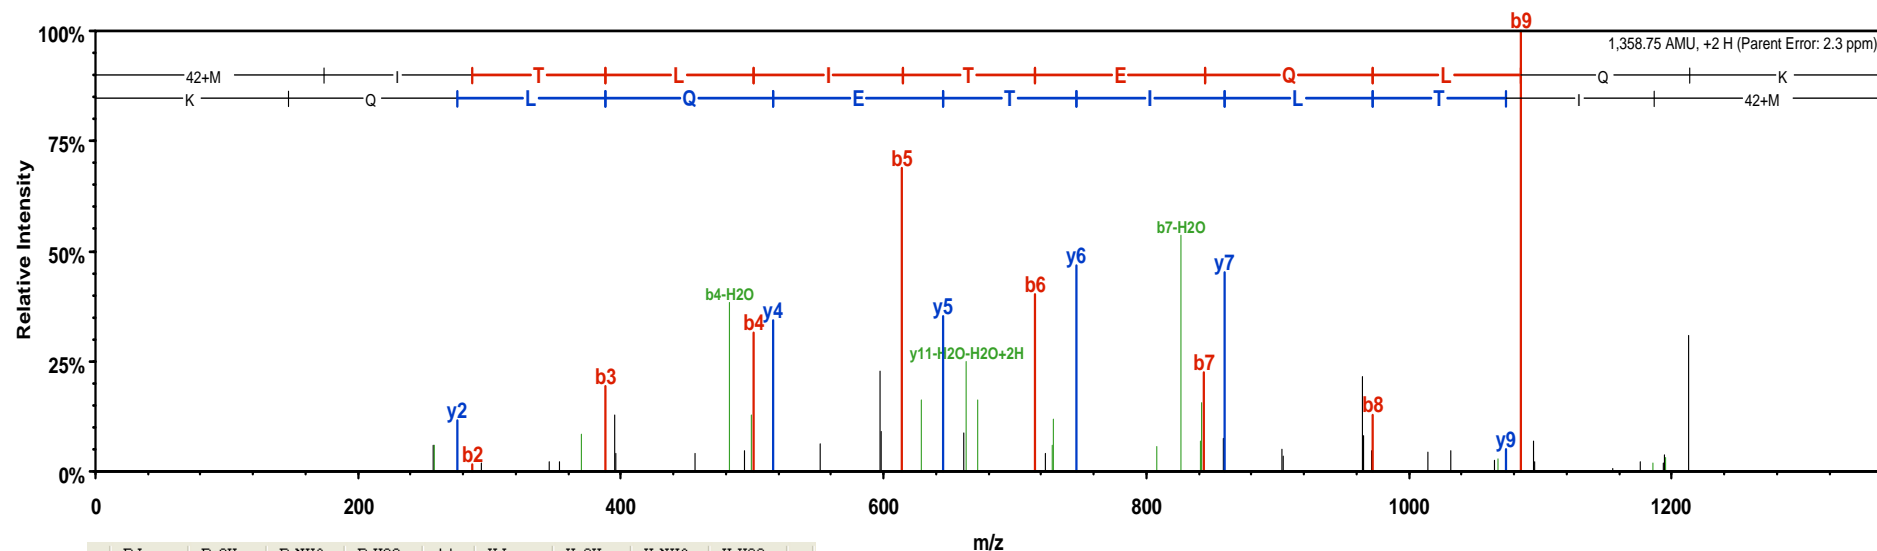

| ... | B Ions  | B+2H  | B-NH3   | B-H2O   | AA   | Y Ions  | Y+2H  | Y-NH3   | Y-H2O   | ... |
|-----|---------|-------|---------|---------|------|---------|-------|---------|---------|-----|
| 1   | 174.1   |       |         |         | M+42 | 1,359.8 | 680.4 | 1,342.7 | 1,341.7 | 11  |
| 2   | 287.1   |       |         |         | I    | 1,186.7 | 593.9 | 1,169.7 | 1,168.7 | 10  |
| 3   | 388.2   |       |         | 370.2   | T    | 1,073.6 | 537.3 | 1,056.6 | 1,055.6 | 9   |
| 4   | 501.3   |       |         | 483.3   | L    | 972.6   | 486.8 | 955.5   | 954.6   | 8   |
| 5   | 614.4   |       |         | 596.3   | I    | 859.5   | 430.2 | 842.5   | 841.5   | 7   |
| 6   | 715.4   | 358.2 |         | 697.4   | T    | 746.4   | 373.7 | 729.4   | 728.4   | 6   |
| 7   | 844.4   | 422.7 |         | 826.4   | E    | 645.4   |       | 628.3   | 627.3   | 5   |
| 8   | 972.5   | 486.8 | 955.5   | 954.5   | Q    | 516.3   |       | 499.3   |         | 4   |
| 9   | 1,085.6 | 543.3 | 1,068.6 | 1,067.6 | L    | 388.3   |       | 371.2   |         | 3   |
| 10  | 1,213.6 | 607.3 | 1,196.6 | 1,195.6 | Q    | 275.2   |       | 258.1   |         | 2   |
| 11  | 1,359.8 | 680.4 | 1,342.7 | 1,341.7 | K    | 147.1   |       | 130.1   |         | 1   |



# Whole proteome

| Protein No. | Leading protein name  | Sequence               | Mascot Score | Variable Modifications | SILAC State | Charge | m/z       |
|-------------|-----------------------|------------------------|--------------|------------------------|-------------|--------|-----------|
| W-80        | spIP52926IHMGA2_HUMAN | GEGAGQPSTSAQGQPAAPAPQK | 57.88        | Unmodified             | Light       | 2      | 1017.9956 |

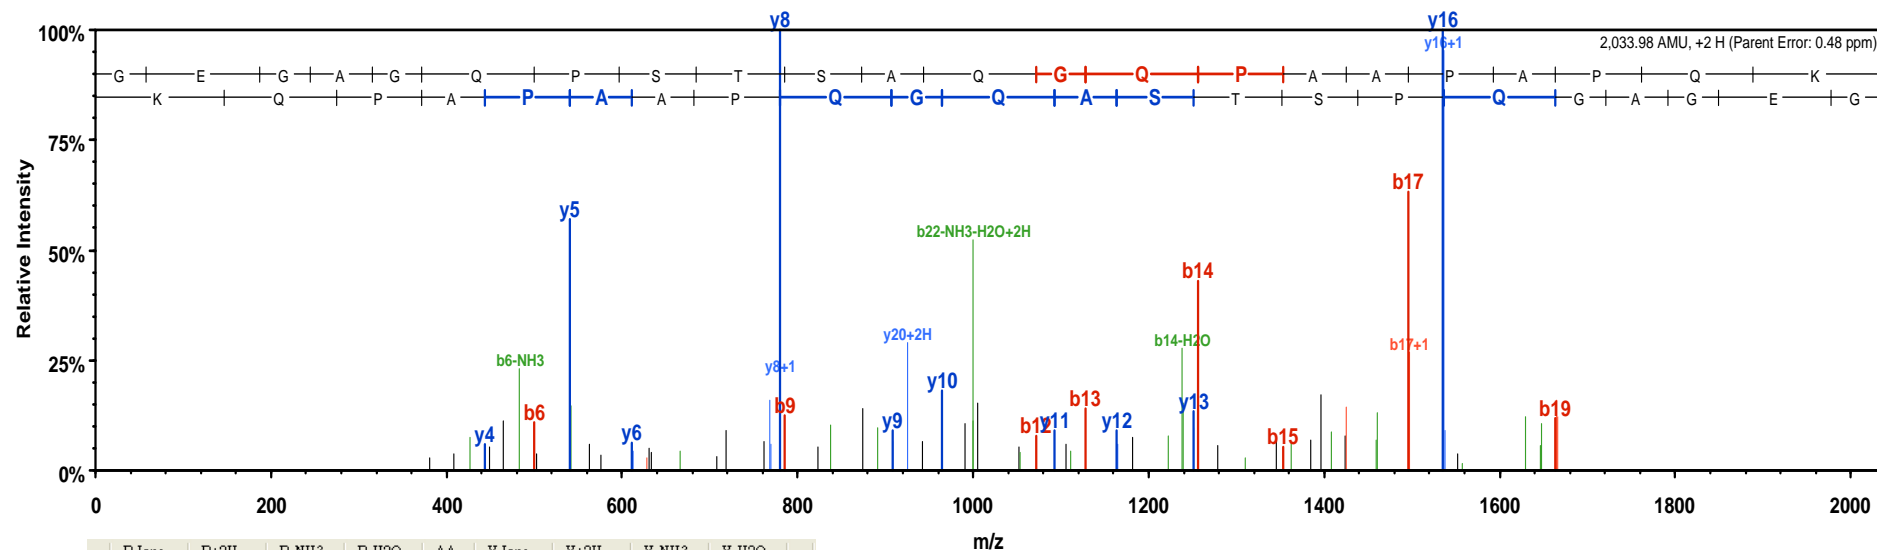

| ... | B Ions  | B+2H    | B-NH3   | B-H2O   | AA | Y Ions  | Y+2H    | Y-NH3   | Y-H2O   | ... |
|-----|---------|---------|---------|---------|----|---------|---------|---------|---------|-----|
| 1   | 58.0    |         |         |         | G  | 2,035.0 | 1,018.0 | 2,018.0 | 2,017.0 | 22  |
| 2   | 187.1   |         |         | 169.1   | E  | 1,978.0 | 989.5   | 1,960.9 | 1,960.0 | 21  |
| 3   | 244.1   |         |         | 226.1   | G  | 1,848.9 | 925.0   | 1,831.9 | 1,830.9 | 20  |
| 4   | 315.1   |         |         | 297.1   | A  | 1,791.9 | 896.5   | 1,774.9 | 1,773.9 | 19  |
| 5   | 372.2   |         |         | 354.1   | G  | 1,720.9 | 860.9   | 1,703.8 | 1,702.9 | 18  |
| 6   | 500.2   | 250.6   | 483.2   | 482.2   | Q  | 1,663.8 | 832.4   | 1,646.8 | 1,645.8 | 17  |
| 7   | 597.3   | 299.1   | 580.2   | 579.3   | P  | 1,535.8 | 768.4   | 1,518.8 | 1,517.8 | 16  |
| 8   | 684.3   | 342.7   | 667.3   | 666.3   | S  | 1,438.7 | 719.9   | 1,421.7 | 1,420.7 | 15  |
| 9   | 785.3   | 393.2   | 768.3   | 767.3   | T  | 1,351.7 | 676.4   | 1,334.7 | 1,333.7 | 14  |
| 10  | 872.4   | 436.7   | 855.3   | 854.4   | S  | 1,250.6 | 625.8   | 1,233.6 | 1,232.6 | 13  |
| 11  | 943.4   | 472.2   | 926.4   | 925.4   | A  | 1,163.6 | 582.3   | 1,146.6 |         | 12  |
| 12  | 1,071.5 | 536.2   | 1,054.4 | 1,053.5 | Q  | 1,092.6 | 546.8   | 1,075.6 |         | 11  |
| 13  | 1,128.5 | 564.7   | 1,111.5 | 1,110.5 | G  | 964.5   | 482.8   | 947.5   |         | 10  |
| 14  | 1,256.6 | 628.8   | 1,239.5 | 1,238.5 | Q  | 907.5   | 454.3   | 890.5   |         | 9   |
| 15  | 1,353.6 | 677.3   | 1,336.6 | 1,335.6 | P  | 779.4   | 390.2   | 762.4   |         | 8   |
| 16  | 1,424.6 | 712.8   | 1,407.6 | 1,406.6 | A  | 682.4   | 341.7   | 665.4   |         | 7   |
| 17  | 1,495.7 | 748.3   | 1,478.7 | 1,477.7 | A  | 611.4   | 306.2   | 594.3   |         | 6   |
| 18  | 1,592.7 | 796.9   | 1,575.7 | 1,574.7 | P  | 540.3   |         | 523.3   |         | 5   |
| 19  | 1,663.8 | 832.4   | 1,646.7 | 1,645.8 | A  | 443.3   |         | 426.2   |         | 4   |
| 20  | 1,760.8 | 880.9   | 1,743.8 | 1,742.8 | P  | 372.2   |         | 355.2   |         | 3   |
| 21  | 1,888.9 | 944.9   | 1,871.9 | 1,870.9 | Q  | 275.2   |         | 258.1   |         | 2   |
| 22  | 2,035.0 | 1,018.0 | 2,018.0 | 2,017.0 | K  | 147.1   |         | 130.1   |         | 1   |

# Whole proteome

| Protein No. | Leading protein name  | Sequence         | Mascot Score | Variable Modifications | SILAC State | Charge | m/z       |
|-------------|-----------------------|------------------|--------------|------------------------|-------------|--------|-----------|
| W-81        | sp P51572 BAP31_HUMAN | VNLQNNPGAMEHFHMK | 56.37        | Unmodified             | Light       | 2      | 933.94053 |

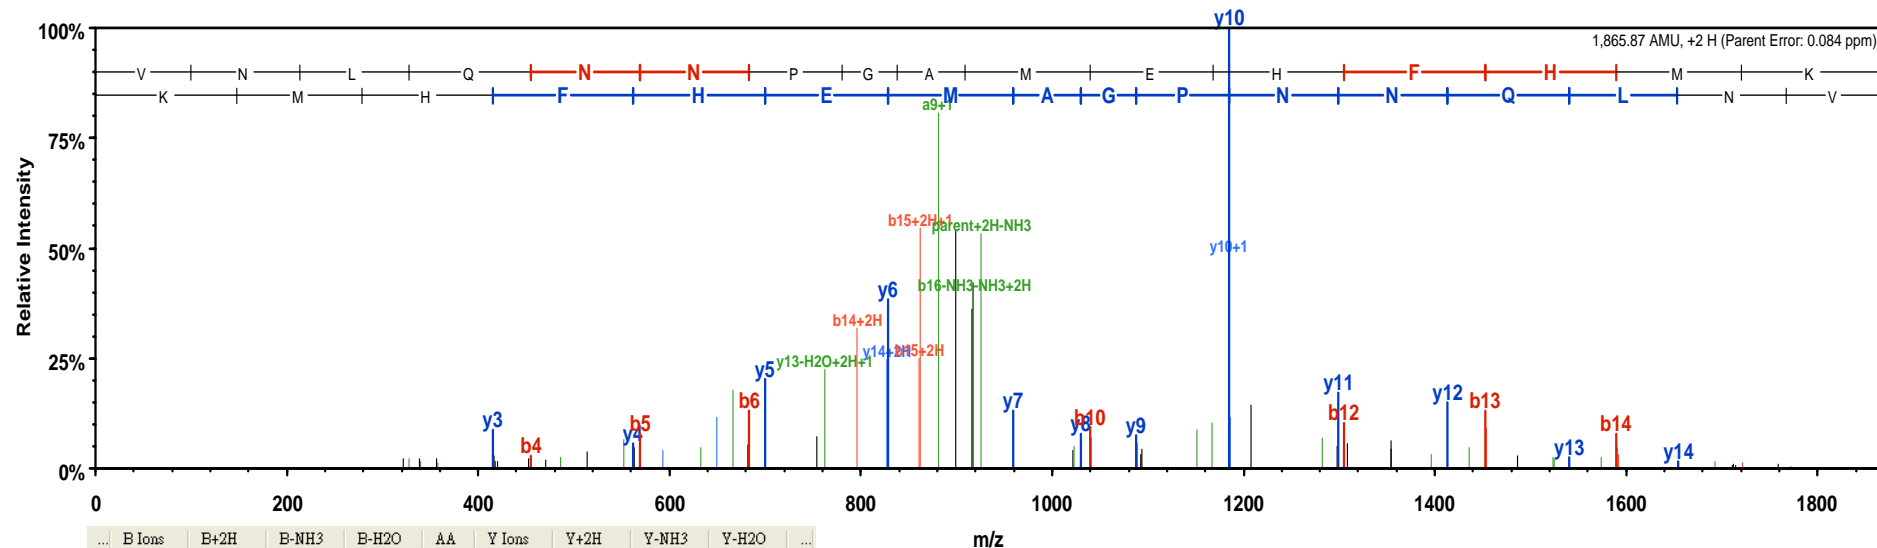

| ... | B Ions  | B+2H  | B-NH3   | B-H2O   | AA | Y Ions  | Y+2H  | Y-NH3   | Y-H2O   | ... |
|-----|---------|-------|---------|---------|----|---------|-------|---------|---------|-----|
| 1   | 100.1   |       |         |         | V  | 1,866.9 | 933.9 | 1,849.8 | 1,848.9 | 16  |
| 2   | 214.1   |       | 197.1   |         | N  | 1,767.8 | 884.4 | 1,750.8 | 1,749.8 | 15  |
| 3   | 327.2   |       | 310.2   |         | L  | 1,653.8 | 827.4 | 1,636.7 | 1,635.8 | 14  |
| 4   | 455.3   |       | 438.2   |         | Q  | 1,540.7 | 770.8 | 1,523.7 | 1,522.7 | 13  |
| 5   | 569.3   |       | 552.3   |         | N  | 1,412.6 | 706.8 | 1,395.6 | 1,394.6 | 12  |
| 6   | 683.3   | 342.2 | 666.3   |         | N  | 1,298.6 | 649.8 | 1,281.6 | 1,280.6 | 11  |
| 7   | 780.4   | 390.7 | 763.4   |         | P  | 1,184.5 | 592.8 | 1,167.5 | 1,166.5 | 10  |
| 8   | 837.4   | 419.2 | 820.4   |         | G  | 1,087.5 | 544.2 | 1,070.5 | 1,069.5 | 9   |
| 9   | 908.5   | 454.7 | 891.4   |         | A  | 1,030.5 | 515.7 | 1,013.4 | 1,012.4 | 8   |
| 10  | 1,039.5 | 520.3 | 1,022.5 |         | M  | 959.4   | 480.2 | 942.4   | 941.4   | 7   |
| 11  | 1,168.5 | 584.8 | 1,151.5 | 1,150.5 | E  | 828.4   | 414.7 | 811.4   | 810.4   | 6   |
| 12  | 1,305.6 | 653.3 | 1,288.6 | 1,287.6 | H  | 699.3   | 350.2 | 682.3   |         | 5   |
| 13  | 1,452.7 | 726.8 | 1,435.6 | 1,434.7 | F  | 562.3   | 281.6 | 545.3   |         | 4   |
| 14  | 1,589.7 | 795.4 | 1,572.7 | 1,571.7 | H  | 415.2   | 208.1 | 398.2   |         | 3   |
| 15  | 1,720.8 | 860.9 | 1,703.7 | 1,702.8 | M  | 278.2   |       | 261.1   |         | 2   |
| 16  | 1,866.9 | 933.9 | 1,849.8 | 1,848.9 | K  | 147.1   |       | 130.1   |         | 1   |

# Whole proteome

| Protein No. | Leading protein name | Sequence                                                  | Mascot Score | Variable Modifications | SILAC State | Charge | m/z       |
|-------------|----------------------|-----------------------------------------------------------|--------------|------------------------|-------------|--------|-----------|
| W-82        | splQ9BZ95INSD3_HUMAN | E E P V L K E E E A P V Q P I L S S V P T T E V S T G V K | 55.94        | Unmodified             | Light       | 3      | 988.53229 |

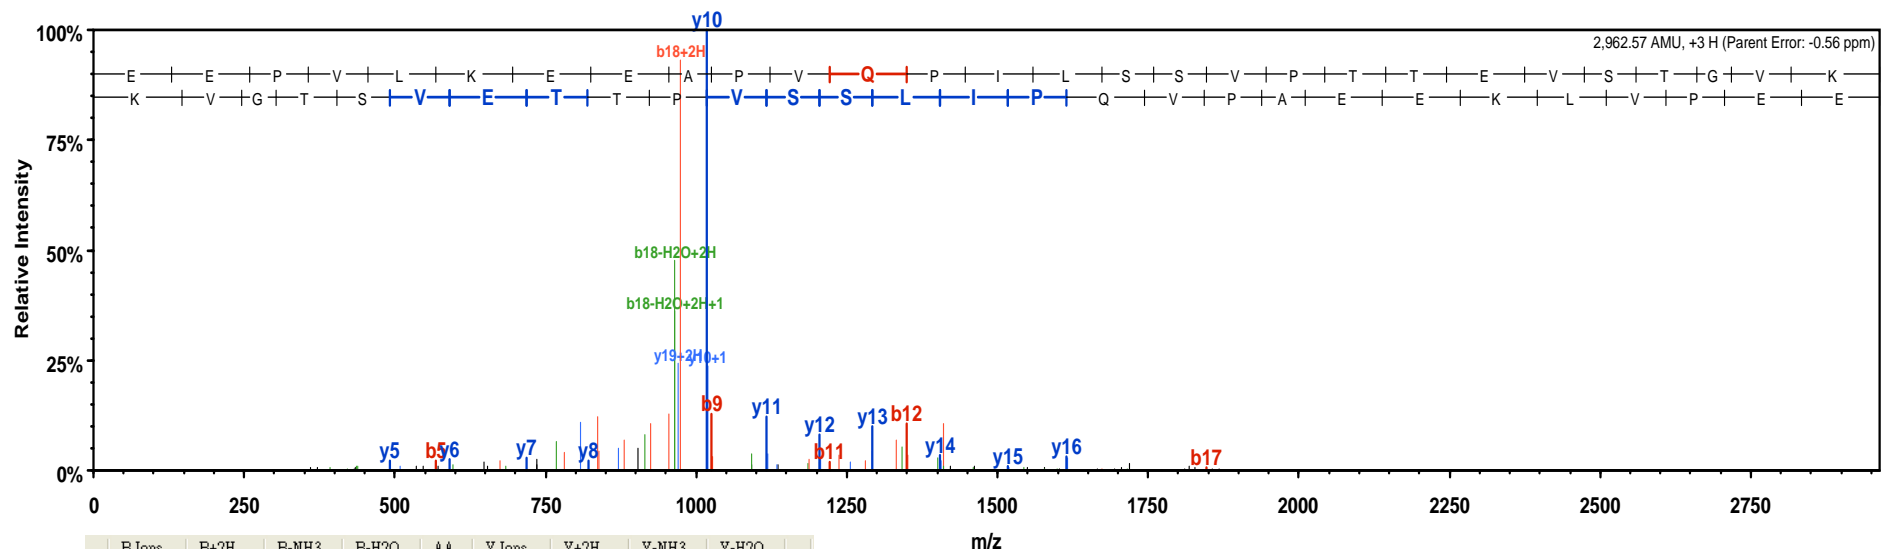

| ... | B Ions  | B+2H    | B-NH3   | B-H2O   | AA | Y Ions  | Y+2H    | Y-NH3   | Y-H2O   | ... |
|-----|---------|---------|---------|---------|----|---------|---------|---------|---------|-----|
| 1   | 130.0   |         |         | 112.0   | E  | 2,963.6 | 1,482.3 | 2,946.6 | 2,945.6 | 28  |
| 2   | 259.1   |         |         | 241.1   | E  | 2,834.5 | 1,417.8 | 2,817.5 | 2,816.5 | 27  |
| 3   | 356.1   |         |         | 338.1   | P  | 2,705.5 | 1,353.3 | 2,688.5 | 2,687.5 | 26  |
| 4   | 455.2   |         |         | 437.2   | V  | 2,608.4 | 1,304.7 | 2,591.4 | 2,590.4 | 25  |
| 5   | 568.3   |         |         | 550.3   | L  | 2,509.4 | 1,255.2 | 2,492.3 | 2,491.4 | 24  |
| 6   | 696.4   | 348.7   | 679.4   | 678.4   | K  | 2,396.3 | 1,198.6 | 2,379.3 | 2,378.3 | 23  |
| 7   | 825.4   | 413.2   | 808.4   | 807.4   | E  | 2,268.2 | 1,134.6 | 2,251.2 | 2,250.2 | 22  |
| 8   | 954.5   | 477.7   | 937.5   | 936.5   | E  | 2,139.2 | 1,070.1 | 2,122.1 | 2,121.1 | 21  |
| 9   | 1,025.5 | 513.3   | 1,008.5 | 1,007.5 | A  | 2,010.1 | 1,005.6 | 1,993.1 | 1,992.1 | 20  |
| 10  | 1,122.6 | 561.8   | 1,105.5 | 1,104.6 | P  | 1,939.1 | 970.0   | 1,922.0 | 1,921.1 | 19  |
| 11  | 1,221.6 | 611.3   | 1,204.6 | 1,203.6 | V  | 1,842.0 | 921.5   | 1,825.0 | 1,824.0 | 18  |
| 12  | 1,349.7 | 675.4   | 1,332.7 | 1,331.7 | Q  | 1,743.0 | 872.0   | 1,725.9 | 1,724.9 | 17  |
| 13  | 1,446.7 | 723.9   | 1,429.7 | 1,428.7 | P  | 1,614.9 | 808.0   | 1,597.9 | 1,596.9 | 16  |
| 14  | 1,559.8 | 780.4   | 1,542.8 | 1,541.8 | I  | 1,517.8 | 759.4   | 1,500.8 | 1,499.8 | 15  |
| 15  | 1,672.9 | 837.0   | 1,655.9 | 1,654.9 | L  | 1,404.8 | 702.9   | 1,387.7 | 1,386.7 | 14  |
| 16  | 1,759.9 | 880.5   | 1,742.9 | 1,741.9 | S  | 1,291.7 | 646.3   | 1,274.6 | 1,273.7 | 13  |
| 17  | 1,847.0 | 924.0   | 1,830.0 | 1,829.0 | S  | 1,204.6 | 602.8   | 1,187.6 | 1,186.6 | 12  |
| 18  | 1,946.0 | 973.5   | 1,929.0 | 1,928.0 | V  | 1,117.6 | 559.3   | 1,100.6 | 1,099.6 | 11  |
| 19  | 2,043.1 | 1,022.1 | 2,026.1 | 2,025.1 | P  | 1,018.5 | 509.8   | 1,001.5 | 1,000.5 | 10  |
| 20  | 2,144.1 | 1,072.6 | 2,127.1 | 2,126.1 | T  | 921.5   | 461.2   | 904.5   | 903.5   | 9   |
| 21  | 2,245.2 | 1,123.1 | 2,228.2 | 2,227.2 | T  | 820.4   | 410.7   | 803.4   | 802.4   | 8   |
| 22  | 2,374.2 | 1,187.6 | 2,357.2 | 2,356.2 | E  | 719.4   | 360.2   | 702.4   | 701.4   | 7   |
| 23  | 2,473.3 | 1,237.2 | 2,456.3 | 2,455.3 | V  | 590.4   | 295.7   | 573.3   | 572.3   | 6   |
| 24  | 2,560.3 | 1,280.7 | 2,543.3 | 2,542.3 | S  | 491.3   |         | 474.3   | 473.3   | 5   |
| 25  | 2,661.4 | 1,331.2 | 2,644.4 | 2,643.4 | T  | 404.3   |         | 387.2   | 386.2   | 4   |
| 26  | 2,718.4 | 1,359.7 | 2,701.4 | 2,700.4 | G  | 303.2   |         | 286.2   |         | 3   |
| 27  | 2,817.5 | 1,409.2 | 2,800.4 | 2,799.5 | V  | 246.2   |         | 229.2   |         | 2   |
| 28  | 2,963.6 | 1,482.3 | 2,946.6 | 2,945.6 | K  | 147.1   |         | 130.1   |         | 1   |

# Whole proteome

| Protein No. | Leading protein name | Sequence                 | Mascot Score | Variable Modifications | SILAC State | Charge | m/z       |
|-------------|----------------------|--------------------------|--------------|------------------------|-------------|--------|-----------|
| W-83        | splQ03405IUPAR_HUMAN | SPEEQCLDVVTHWVQEGEGEGRPK | 54.68        | Unmodified             | Heavy       | 3      | 908.42917 |

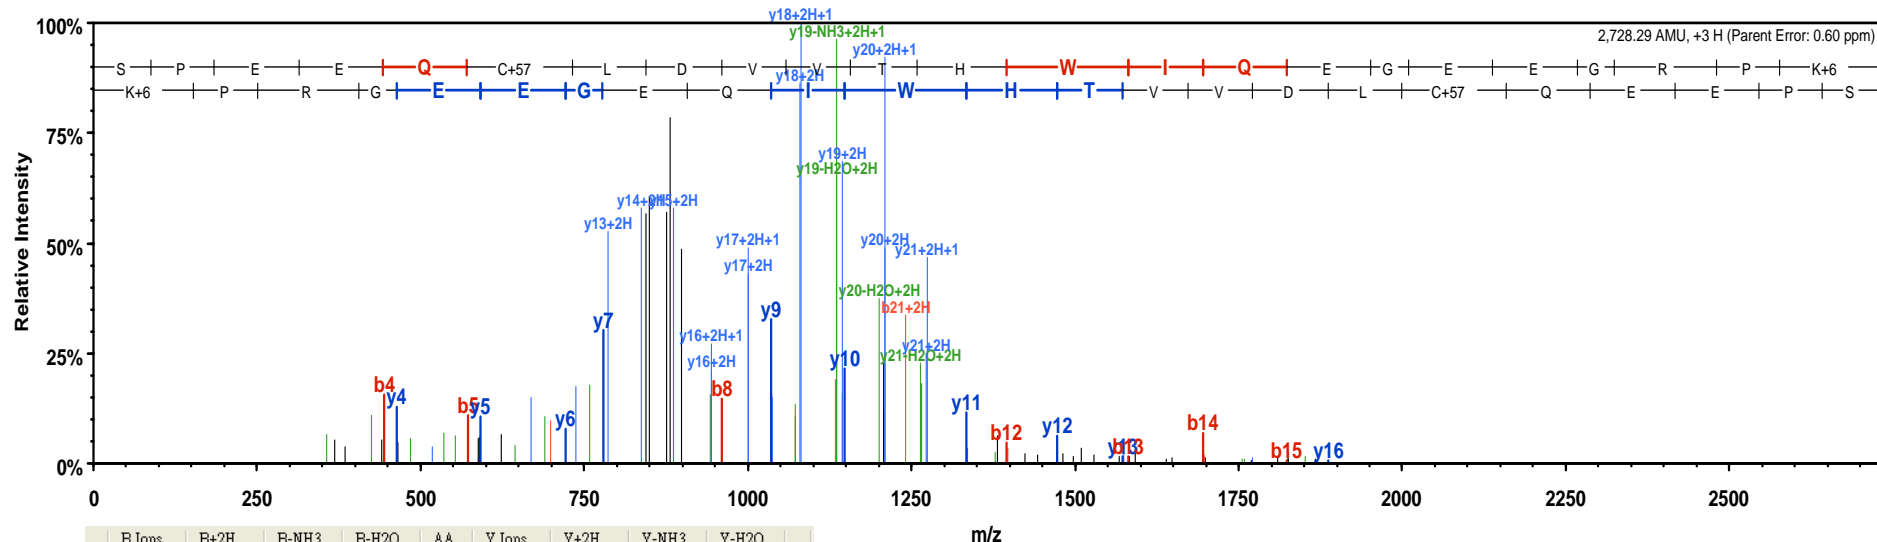

| ... | B Ions  | B+2H    | B-NH3   | B-H2O   | AA   | Y Ions  | Y+2H    | Y-NH3   | Y-H2O   | ... |
|-----|---------|---------|---------|---------|------|---------|---------|---------|---------|-----|
| 1   | 88.0    |         |         | 70.0    | S    | 2,729.3 | 1,365.2 | 2,712.3 | 2,711.3 | 23  |
| 2   | 185.1   |         |         | 167.1   | P    | 2,642.3 | 1,321.6 | 2,625.2 | 2,624.3 | 22  |
| 3   | 314.1   |         |         | 296.1   | E    | 2,545.2 | 1,273.1 | 2,528.2 | 2,527.2 | 21  |
| 4   | 443.2   |         |         | 425.2   | E    | 2,416.2 | 1,208.6 | 2,399.1 | 2,398.2 | 20  |
| 5   | 571.2   |         | 554.2   | 553.2   | Q    | 2,287.1 | 1,144.1 | 2,270.1 | 2,269.1 | 19  |
| 6   | 731.3   | 366.1   | 714.2   | 713.3   | C+57 | 2,159.1 | 1,080.0 | 2,142.0 | 2,141.1 | 18  |
| 7   | 844.4   | 422.7   | 827.3   | 826.3   | L    | 1,999.0 | 1,000.0 | 1,982.0 | 1,981.0 | 17  |
| 8   | 959.4   | 480.2   | 942.4   | 941.4   | D    | 1,886.0 | 943.5   | 1,868.9 | 1,867.9 | 16  |
| 9   | 1,058.4 | 529.7   | 1,041.4 | 1,040.4 | V    | 1,770.9 | 886.0   | 1,753.9 | 1,752.9 | 15  |
| 10  | 1,157.5 | 579.3   | 1,140.5 | 1,139.5 | V    | 1,671.9 | 836.4   | 1,654.8 | 1,653.8 | 14  |
| 11  | 1,258.6 | 629.8   | 1,241.5 | 1,240.6 | T    | 1,572.8 | 786.9   | 1,555.8 | 1,554.8 | 13  |
| 12  | 1,395.6 | 698.3   | 1,378.6 | 1,377.6 | H    | 1,471.7 | 736.4   | 1,454.7 | 1,453.7 | 12  |
| 13  | 1,581.7 | 791.4   | 1,564.7 | 1,563.7 | W    | 1,334.7 | 667.8   | 1,317.7 | 1,316.7 | 11  |
| 14  | 1,694.8 | 847.9   | 1,677.8 | 1,676.8 | I    | 1,148.6 | 574.8   | 1,131.6 | 1,130.6 | 10  |
| 15  | 1,822.8 | 911.9   | 1,805.8 | 1,804.8 | Q    | 1,035.5 | 518.3   | 1,018.5 | 1,017.5 | 9   |
| 16  | 1,951.9 | 976.4   | 1,934.9 | 1,933.9 | E    | 907.5   | 454.2   | 890.4   | 889.4   | 8   |
| 17  | 2,008.9 | 1,005.0 | 1,991.9 | 1,990.9 | G    | 778.4   | 389.7   | 761.4   | 760.4   | 7   |
| 18  | 2,137.9 | 1,069.5 | 2,120.9 | 2,119.9 | E    | 721.4   | 361.2   | 704.4   | 703.4   | 6   |
| 19  | 2,267.0 | 1,134.0 | 2,250.0 | 2,249.0 | E    | 592.4   | 296.7   | 575.3   | 574.3   | 5   |
| 20  | 2,324.0 | 1,162.5 | 2,307.0 | 2,306.0 | G    | 463.3   | 232.2   | 446.3   |         | 4   |
| 21  | 2,480.1 | 1,240.6 | 2,463.1 | 2,462.1 | R    | 406.3   | 203.6   | 389.3   |         | 3   |
| 22  | 2,577.2 | 1,289.1 | 2,560.1 | 2,559.2 | P    | 250.2   |         | 233.2   |         | 2   |
| 23  | 2,729.3 | 1,365.2 | 2,712.3 | 2,711.3 | K+6  | 153.1   |         | 136.1   |         | 1   |

# Whole proteome

| Protein No. | Leading protein name | Sequence  | Mascot Score | Variable Modifications | SILAC State | Charge | m/z       |
|-------------|----------------------|-----------|--------------|------------------------|-------------|--------|-----------|
| W-84        | sp P00846 ATP6_HUMAN | LITTQQWLK | 54.17        | Unmodified             | Light       | 2      | 622.37408 |

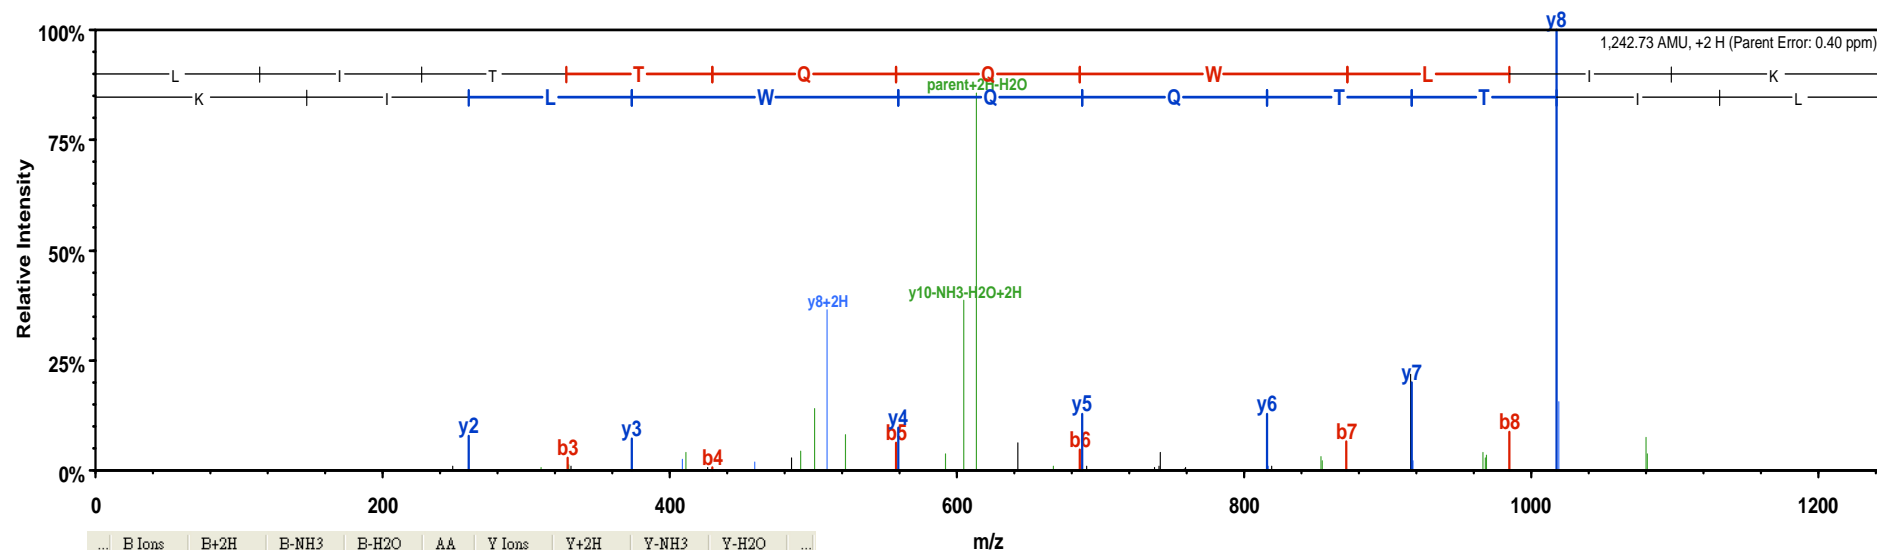

| ... | B Ions  | B+2H  | B-NH3   | B-H2O   | AA | Y Ions  | Y+2H  | Y-NH3   | Y-H2O   | ... |
|-----|---------|-------|---------|---------|----|---------|-------|---------|---------|-----|
| 1   | 114.1   |       |         |         | L  | 1,243.7 | 622.4 | 1,226.7 | 1,225.7 | 10  |
| 2   | 227.2   |       |         |         | I  | 1,130.7 | 565.8 | 1,113.6 | 1,112.6 | 9   |
| 3   | 328.2   |       |         | 310.2   | T  | 1,017.6 | 509.3 | 1,000.5 | 999.6   | 8   |
| 4   | 429.3   |       |         | 411.3   | T  | 916.5   | 458.8 | 899.5   | 898.5   | 7   |
| 5   | 557.3   |       | 540.3   | 539.3   | Q  | 815.5   | 408.2 | 798.5   |         | 6   |
| 6   | 685.4   | 343.2 | 668.4   | 667.4   | Q  | 687.4   |       | 670.4   |         | 5   |
| 7   | 871.5   | 436.2 | 854.4   | 853.5   | W  | 559.4   |       | 542.3   |         | 4   |
| 8   | 984.6   | 492.8 | 967.5   | 966.5   | L  | 373.3   |       | 356.3   |         | 3   |
| 9   | 1,097.6 | 549.3 | 1,080.6 | 1,079.6 | I  | 260.2   |       | 243.2   |         | 2   |
| 10  | 1,243.7 | 622.4 | 1,226.7 | 1,225.7 | K  | 147.1   |       | 130.1   |         | 1   |

# Whole proteome

| Protein No. | Leading protein name  | Sequence    | Mascot Score | Variable Modifications  | SILAC State | Charge | m/z       |
|-------------|-----------------------|-------------|--------------|-------------------------|-------------|--------|-----------|
| W-85        | splQ8IXL7IMSRB3_HUMAN | SAFNLLHLVTK | 54.16        | Acetyl (Protein N-term) | Light       | 2      | 642.86916 |

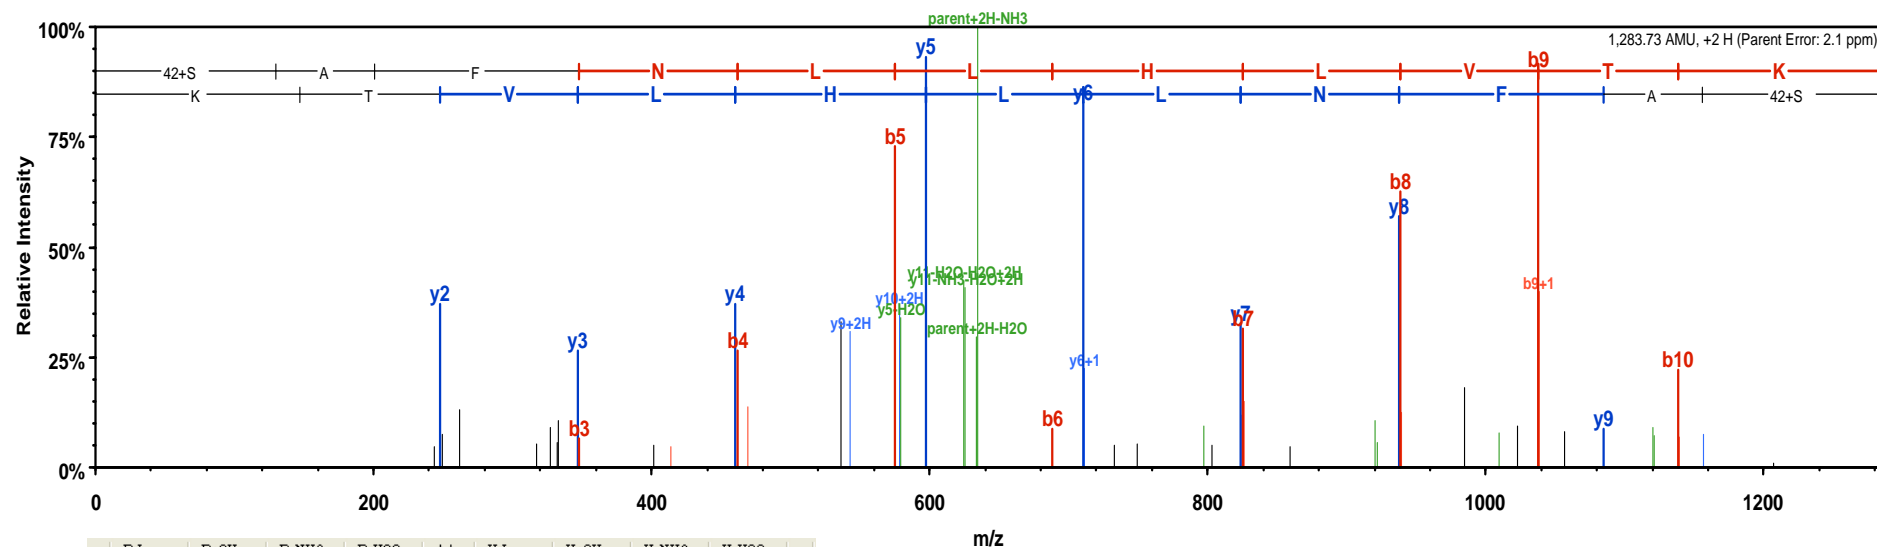

| ... | B Ions  | B+2H  | B-NH3   | B-H2O   | AA   | Y Ions  | Y+2H  | Y-NH3   | Y-H2O   | ... |
|-----|---------|-------|---------|---------|------|---------|-------|---------|---------|-----|
| 1   | 130.0   |       |         | 112.0   | S+42 | 1,284.7 | 642.9 | 1,267.7 | 1,266.7 | 11  |
| 2   | 201.1   |       |         | 183.1   | A    | 1,155.7 | 578.3 | 1,138.7 | 1,137.7 | 10  |
| 3   | 348.2   |       |         | 330.1   | F    | 1,084.7 | 542.8 | 1,067.6 | 1,066.6 | 9   |
| 4   | 462.2   |       | 445.2   | 444.2   | N    | 937.6   | 469.3 | 920.6   | 919.6   | 8   |
| 5   | 575.3   |       | 558.3   | 557.3   | L    | 823.5   | 412.3 | 806.5   | 805.5   | 7   |
| 6   | 688.4   | 344.7 | 671.3   | 670.4   | L    | 710.5   | 355.7 | 693.4   | 692.4   | 6   |
| 7   | 825.4   | 413.2 | 808.4   | 807.4   | H    | 597.4   | 299.2 | 580.3   | 579.4   | 5   |
| 8   | 938.5   | 469.8 | 921.5   | 920.5   | L    | 460.3   |       | 443.3   | 442.3   | 4   |
| 9   | 1,037.6 | 519.3 | 1,020.6 | 1,019.6 | V    | 347.2   |       | 330.2   | 329.2   | 3   |
| 10  | 1,138.6 | 569.8 | 1,121.6 | 1,120.6 | T    | 248.2   |       | 231.1   | 230.1   | 2   |
| 11  | 1,284.7 | 642.9 | 1,267.7 | 1,266.7 | K    | 147.1   |       | 130.1   |         | 1   |

# Whole proteome

| Protein No. | Leading protein name   | Sequence      | Mascot Score | Variable Modifications   | SILAC State | Charge | m/z       |
|-------------|------------------------|---------------|--------------|--------------------------|-------------|--------|-----------|
| W-86        | sp P83881 IRL36A_HUMAN | QSGYGGQTKPIFR | 53.27        | Gln->pyro-Glu (N-term Q) | Heavy       | 2      | 711.36223 |

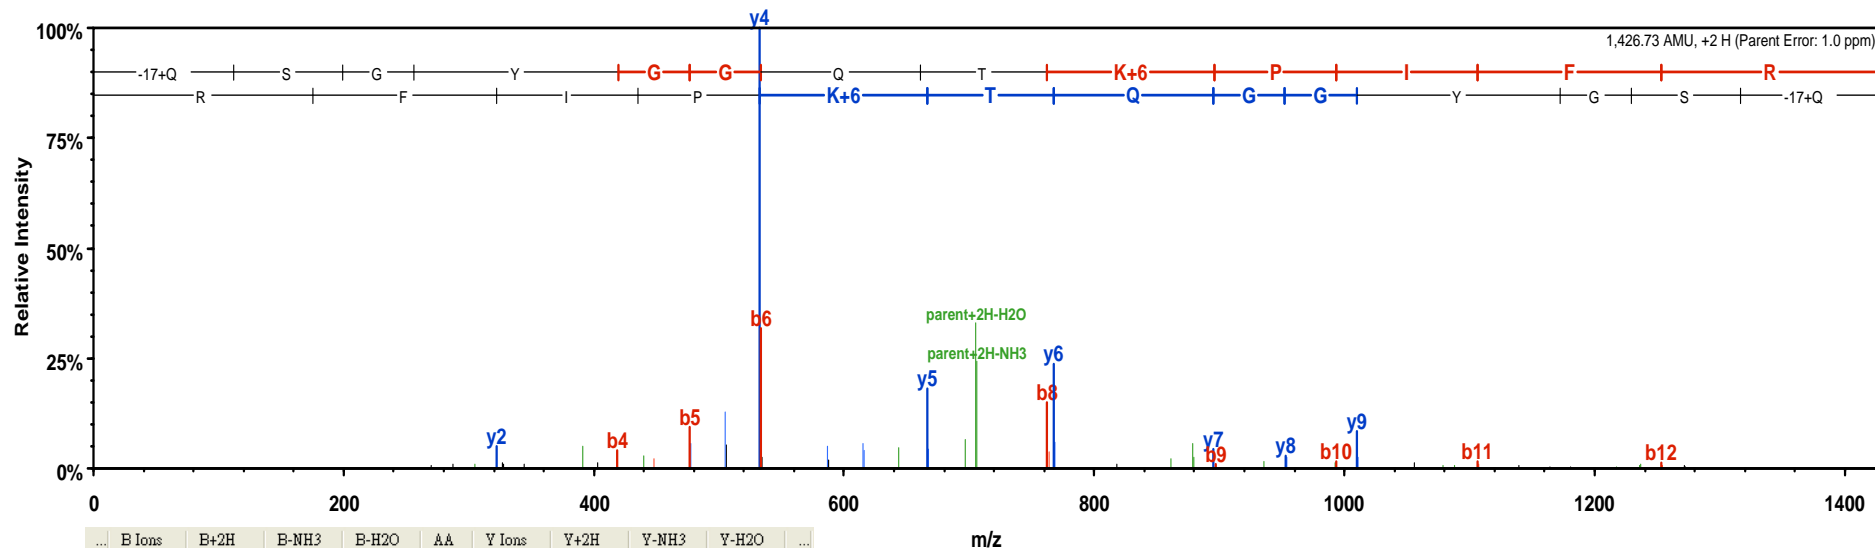

| ... | B Ions  | B+2H  | B-NH3   | B-H2O   | AA   | Y Ions  | Y+2H  | Y-NH3   | Y-H2O   | ... |
|-----|---------|-------|---------|---------|------|---------|-------|---------|---------|-----|
| 1   | 112.0   |       | 95.0    |         | Q-17 | 1,427.7 | 714.4 | 1,410.7 | 1,409.7 | 13  |
| 2   | 199.1   |       | 182.0   | 181.1   | S    | 1,316.7 | 658.9 | 1,299.7 | 1,298.7 | 12  |
| 3   | 256.1   |       | 239.1   | 238.1   | G    | 1,229.7 | 615.3 | 1,212.6 | 1,211.7 | 11  |
| 4   | 419.2   |       | 402.1   | 401.1   | Y    | 1,172.7 | 586.8 | 1,155.6 | 1,154.6 | 10  |
| 5   | 476.2   |       | 459.2   | 458.2   | G    | 1,009.6 | 505.3 | 992.6   | 991.6   | 9   |
| 6   | 533.2   | 267.1 | 516.2   | 515.2   | G    | 952.6   | 476.8 | 935.5   | 934.6   | 8   |
| 7   | 661.3   | 331.1 | 644.2   | 643.2   | Q    | 895.5   | 448.3 | 878.5   | 877.5   | 7   |
| 8   | 762.3   | 381.7 | 745.3   | 744.3   | T    | 767.5   | 384.2 | 750.5   | 749.5   | 6   |
| 9   | 896.4   | 448.7 | 879.4   | 878.4   | K+6  | 666.4   | 333.7 | 649.4   |         | 5   |
| 10  | 993.5   | 497.2 | 976.4   | 975.5   | P    | 532.3   |       | 515.3   |         | 4   |
| 11  | 1,106.6 | 553.8 | 1,089.5 | 1,088.5 | I    | 435.3   |       | 418.2   |         | 3   |
| 12  | 1,253.6 | 627.3 | 1,236.6 | 1,235.6 | F    | 322.2   |       | 305.2   |         | 2   |
| 13  | 1,427.7 | 714.4 | 1,410.7 | 1,409.7 | R    | 175.1   |       | 158.1   |         | 1   |

# Whole proteome

| Protein No. | Leading protein name  | Sequence           | Mascot Score | Variable Modifications  | SILAC State | Charge | m/z       |
|-------------|-----------------------|--------------------|--------------|-------------------------|-------------|--------|-----------|
| W-87        | sp P62877 IRBX1_HUMAN | AAAMDVDTPSGTNSGAGK | 53.25        | Acetyl (Protein N-term) | Heavy       | 2      | 846.38069 |

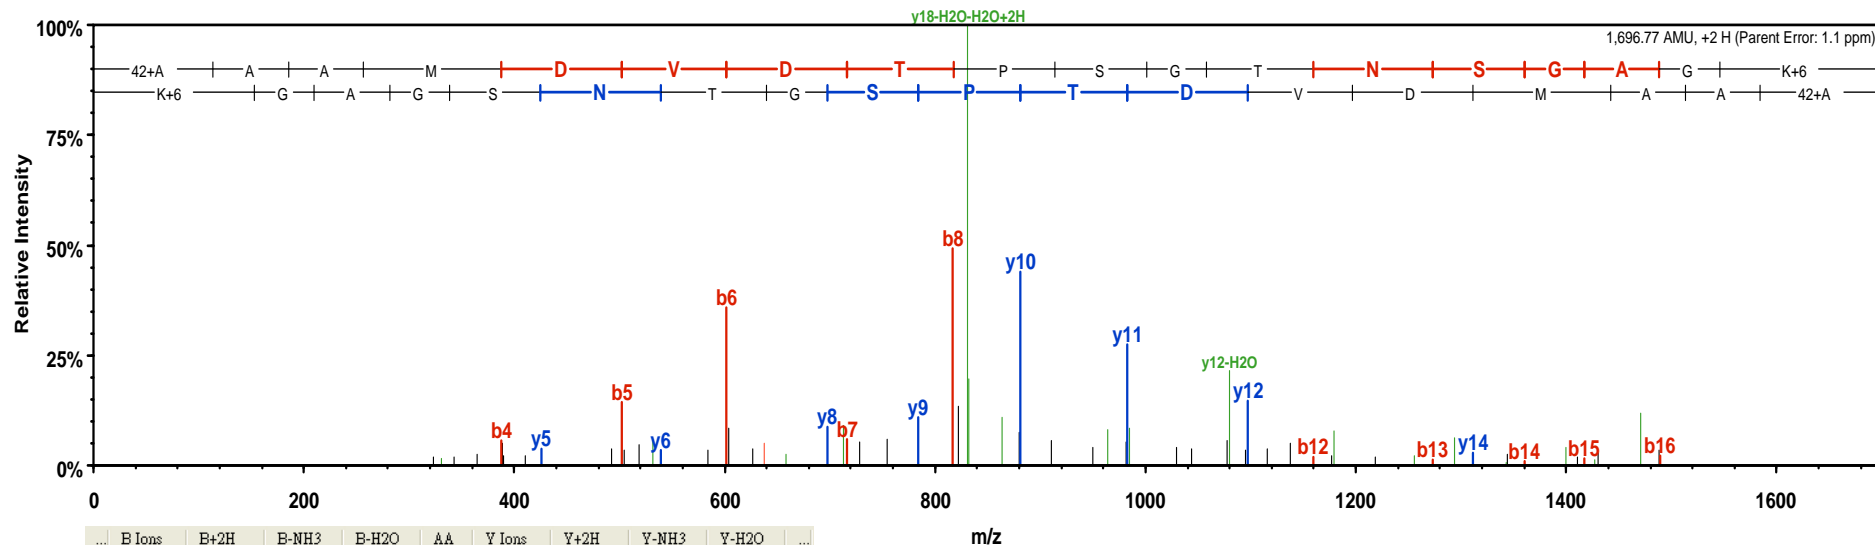

| ... | B Ions  | B+2H  | B-NH3   | B-H2O   | AA   | Y Ions  | Y+2H  | Y-NH3   | Y-H2O   | ... |
|-----|---------|-------|---------|---------|------|---------|-------|---------|---------|-----|
| 1   | 114.1   |       |         |         | A+42 | 1,697.8 | 849.4 | 1,680.7 | 1,679.8 | 18  |
| 2   | 185.1   |       |         |         | A    | 1,584.7 | 792.9 | 1,567.7 | 1,566.7 | 17  |
| 3   | 256.1   |       |         |         | A    | 1,513.7 | 757.3 | 1,496.7 | 1,495.7 | 16  |
| 4   | 387.2   |       |         |         | M    | 1,442.7 | 721.8 | 1,425.6 | 1,424.6 | 15  |
| 5   | 502.2   |       |         | 484.2   | D    | 1,311.6 | 656.3 | 1,294.6 | 1,293.6 | 14  |
| 6   | 601.3   | 301.1 |         | 583.3   | V    | 1,196.6 | 598.8 | 1,179.6 | 1,178.6 | 13  |
| 7   | 716.3   | 358.6 |         | 698.3   | D    | 1,097.5 | 549.3 | 1,080.5 | 1,079.5 | 12  |
| 8   | 817.3   | 409.2 |         | 799.3   | T    | 982.5   | 491.7 | 965.5   | 964.5   | 11  |
| 9   | 914.4   | 457.7 |         | 896.4   | P    | 881.4   | 441.2 | 864.4   | 863.4   | 10  |
| 10  | 1,001.4 | 501.2 |         | 983.4   | S    | 784.4   | 392.7 | 767.4   | 766.4   | 9   |
| 11  | 1,058.4 | 529.7 |         | 1,040.4 | G    | 697.4   | 349.2 | 680.3   | 679.3   | 8   |
| 12  | 1,159.5 | 580.3 |         | 1,141.5 | T    | 640.3   | 320.7 | 623.3   | 622.3   | 7   |
| 13  | 1,273.5 | 637.3 | 1,256.5 | 1,255.5 | N    | 539.3   | 270.1 | 522.3   | 521.3   | 6   |
| 14  | 1,360.6 | 680.8 | 1,343.5 | 1,342.6 | S    | 425.2   |       | 408.2   | 407.2   | 5   |
| 15  | 1,417.6 | 709.3 | 1,400.6 | 1,399.6 | G    | 338.2   |       | 321.2   |         | 4   |
| 16  | 1,488.6 | 744.8 | 1,471.6 | 1,470.6 | A    | 281.2   |       | 264.2   |         | 3   |
| 17  | 1,545.6 | 773.3 | 1,528.6 | 1,527.6 | G    | 210.2   |       | 193.1   |         | 2   |
| 18  | 1,697.8 | 849.4 | 1,680.7 | 1,679.8 | K+6  | 153.1   |       | 136.1   |         | 1   |



# Whole proteome

| Protein No. | Leading protein name  | Sequence         | Mascot Score | Variable Modifications | SILAC State | Charge | m/z       |
|-------------|-----------------------|------------------|--------------|------------------------|-------------|--------|-----------|
| W-88        | sp Q9NPA0 CO024_HUMAN | AVVPGVKPQDWISAAR | 53.11        | Unmodified             | Light       | 2      | 847.47285 |

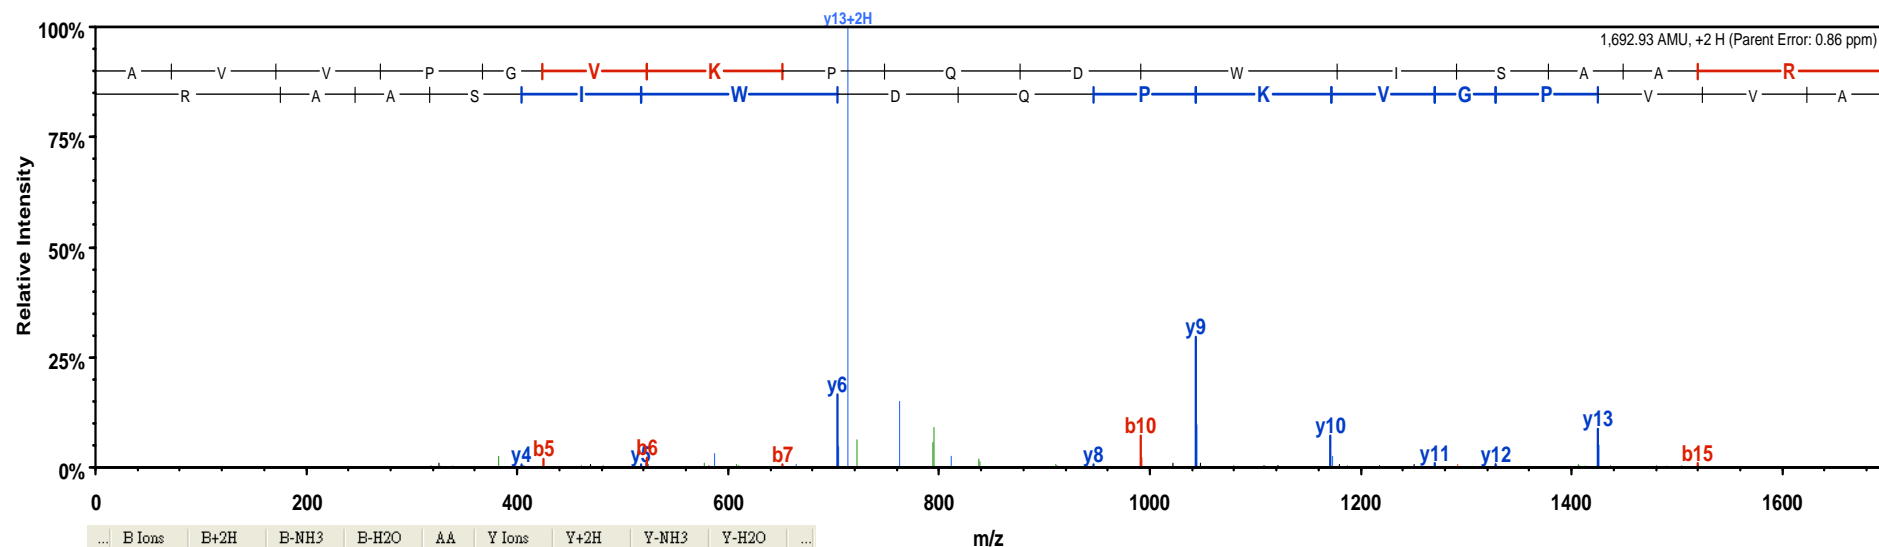

| ... | B Ions  | B+2H  | B-NH3   | B-H2O   | AA | Y Ions  | Y+2H  | Y-NH3   | Y-H2O   | ... |
|-----|---------|-------|---------|---------|----|---------|-------|---------|---------|-----|
| 1   | 72.0    |       |         |         | A  | 1,693.9 | 847.5 | 1,676.9 | 1,675.9 | 16  |
| 2   | 171.1   |       |         |         | V  | 1,622.9 | 812.0 | 1,605.9 | 1,604.9 | 15  |
| 3   | 270.2   |       |         |         | V  | 1,523.8 | 762.4 | 1,506.8 | 1,505.8 | 14  |
| 4   | 367.2   |       |         |         | P  | 1,424.8 | 712.9 | 1,407.7 | 1,406.8 | 13  |
| 5   | 424.3   |       |         |         | G  | 1,327.7 | 664.4 | 1,310.7 | 1,309.7 | 12  |
| 6   | 523.3   | 262.2 |         |         | V  | 1,270.7 | 635.8 | 1,253.7 | 1,252.7 | 11  |
| 7   | 651.4   | 326.2 | 634.4   |         | K  | 1,171.6 | 586.3 | 1,154.6 | 1,153.6 | 10  |
| 8   | 748.5   | 374.7 | 731.4   |         | P  | 1,043.5 | 522.3 | 1,026.5 | 1,025.5 | 9   |
| 9   | 876.5   | 438.8 | 859.5   |         | Q  | 946.5   | 473.7 | 929.4   | 928.5   | 8   |
| 10  | 991.6   | 496.3 | 974.5   | 973.5   | D  | 818.4   | 409.7 | 801.4   | 800.4   | 7   |
| 11  | 1,177.6 | 589.3 | 1,160.6 | 1,159.6 | W  | 703.4   | 352.2 | 686.4   | 685.4   | 6   |
| 12  | 1,290.7 | 645.9 | 1,273.7 | 1,272.7 | I  | 517.3   |       | 500.3   | 499.3   | 5   |
| 13  | 1,377.8 | 689.4 | 1,360.7 | 1,359.7 | S  | 404.2   |       | 387.2   | 386.2   | 4   |
| 14  | 1,448.8 | 724.9 | 1,431.8 | 1,430.8 | A  | 317.2   |       | 300.2   |         | 3   |
| 15  | 1,519.8 | 760.4 | 1,502.8 | 1,501.8 | A  | 246.2   |       | 229.1   |         | 2   |
| 16  | 1,693.9 | 847.5 | 1,676.9 | 1,675.9 | R  | 175.1   |       | 158.1   |         | 1   |

# Whole proteome

| Protein No. | Leading protein name  | Sequence    | Mascot Score | Variable Modifications | SILAC State | Charge | m/z       |
|-------------|-----------------------|-------------|--------------|------------------------|-------------|--------|-----------|
| W-89        | splQ9Y3B9IRRP15_HUMAN | GVVQLFNAVQK | 51.26        | Unmodified             | Heavy       | 2      | 601.84823 |

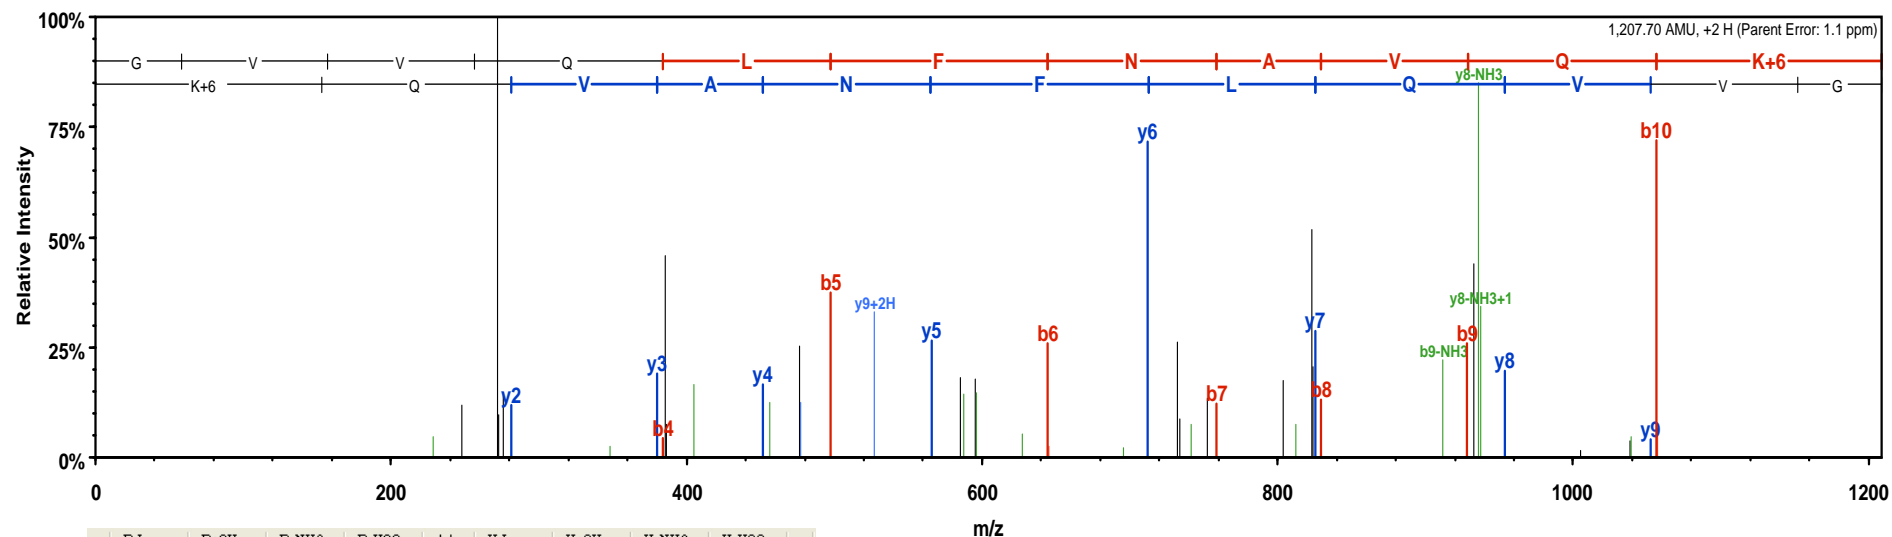

| ... | B Ions  | B+2H  | B-NH3   | B-H2O | AA  | Y Ions  | Y+2H  | Y-NH3   | Y-H2O | ... |
|-----|---------|-------|---------|-------|-----|---------|-------|---------|-------|-----|
| 1   | 58.0    |       |         |       | G   | 1,208.7 | 604.9 | 1,191.7 |       | 11  |
| 2   | 157.1   |       |         |       | V   | 1,151.7 | 576.3 | 1,134.7 |       | 10  |
| 3   | 256.2   |       |         |       | V   | 1,052.6 | 526.8 | 1,035.6 |       | 9   |
| 4   | 384.2   |       | 367.2   |       | Q   | 953.6   | 477.3 | 936.5   |       | 8   |
| 5   | 497.3   |       | 480.3   |       | L   | 825.5   | 413.2 | 808.5   |       | 7   |
| 6   | 644.4   | 322.7 | 627.4   |       | F   | 712.4   | 356.7 | 695.4   |       | 6   |
| 7   | 758.4   | 379.7 | 741.4   |       | N   | 565.3   |       | 548.3   |       | 5   |
| 8   | 829.5   | 415.2 | 812.4   |       | A   | 451.3   |       | 434.3   |       | 4   |
| 9   | 928.5   | 464.8 | 911.5   |       | V   | 380.3   |       | 363.2   |       | 3   |
| 10  | 1,056.6 | 528.8 | 1,039.6 |       | Q   | 281.2   |       | 264.2   |       | 2   |
| 11  | 1,208.7 | 604.9 | 1,191.7 |       | K+6 | 153.1   |       | 136.1   |       | 1   |

# Whole proteome

| Protein No. | Leading protein name  | Sequence     | Mascot Score | Variable Modifications | SILAC State | Charge | m/z       |
|-------------|-----------------------|--------------|--------------|------------------------|-------------|--------|-----------|
| W-90        | sp P68371 TBB2C_HUMAN | INVYYNEATGGK | 51.18        | Unmodified             | Heavy       | 2      | 664.82769 |

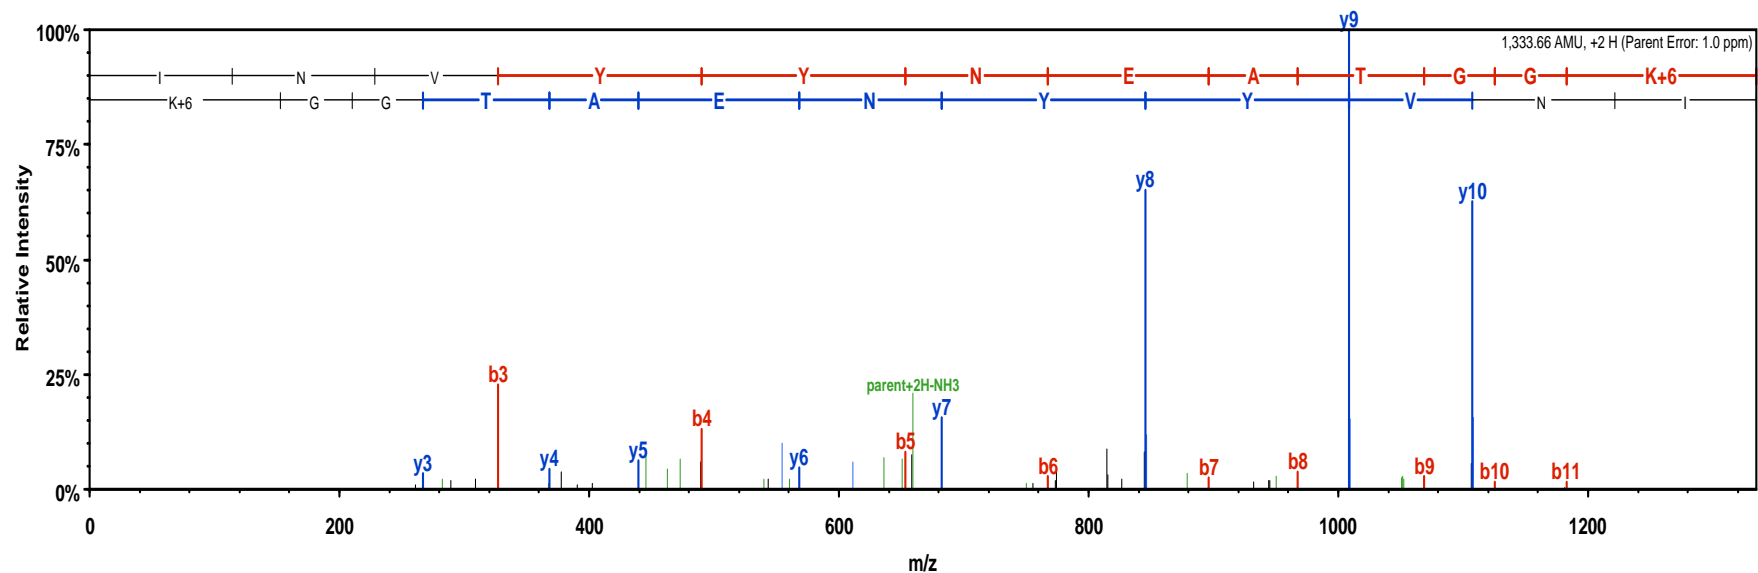

| ... | B Ions  | B+2H  | B-NH3   | B-H2O   | AA  | Y Ions  | Y+2H  | Y-NH3   | Y-H2O   | ... |
|-----|---------|-------|---------|---------|-----|---------|-------|---------|---------|-----|
| 1   | 114.1   |       |         |         | I   | 1,334.7 | 667.8 | 1,317.6 | 1,316.7 | 12  |
| 2   | 228.1   |       | 211.1   |         | N   | 1,221.6 | 611.3 | 1,204.6 | 1,203.6 | 11  |
| 3   | 327.2   |       | 310.2   |         | V   | 1,107.5 | 554.3 | 1,090.5 | 1,089.5 | 10  |
| 4   | 490.3   |       | 473.2   |         | Y   | 1,008.5 | 504.7 | 991.4   | 990.5   | 9   |
| 5   | 653.3   |       | 636.3   |         | Y   | 845.4   | 423.2 | 828.4   | 827.4   | 8   |
| 6   | 767.4   | 384.2 | 750.3   |         | N   | 682.3   | 341.7 | 665.3   | 664.3   | 7   |
| 7   | 896.4   | 448.7 | 879.4   | 878.4   | E   | 568.3   | 284.7 | 551.3   | 550.3   | 6   |
| 8   | 967.5   | 484.2 | 950.4   | 949.4   | A   | 439.3   |       | 422.2   | 421.3   | 5   |
| 9   | 1,068.5 | 534.8 | 1,051.5 | 1,050.5 | T   | 368.2   |       | 351.2   | 350.2   | 4   |
| 10  | 1,125.5 | 563.3 | 1,108.5 | 1,107.5 | G   | 267.2   |       | 250.1   |         | 3   |
| 11  | 1,182.5 | 591.8 | 1,165.5 | 1,164.5 | G   | 210.2   |       | 193.1   |         | 2   |
| 12  | 1,334.7 | 667.8 | 1,317.6 | 1,316.7 | K+6 | 153.1   |       | 136.1   |         | 1   |

# Whole proteome

| Protein No. | Leading protein name  | Sequence        | Mascot Score | Variable Modifications | SILAC State | Charge | m/z       |
|-------------|-----------------------|-----------------|--------------|------------------------|-------------|--------|-----------|
| W-91        | sp O95881 TXD12_HUMAN | VHPEIINENGNPSYK | 50.01        | Unmodified             | Heavy       | 2      | 855.92593 |

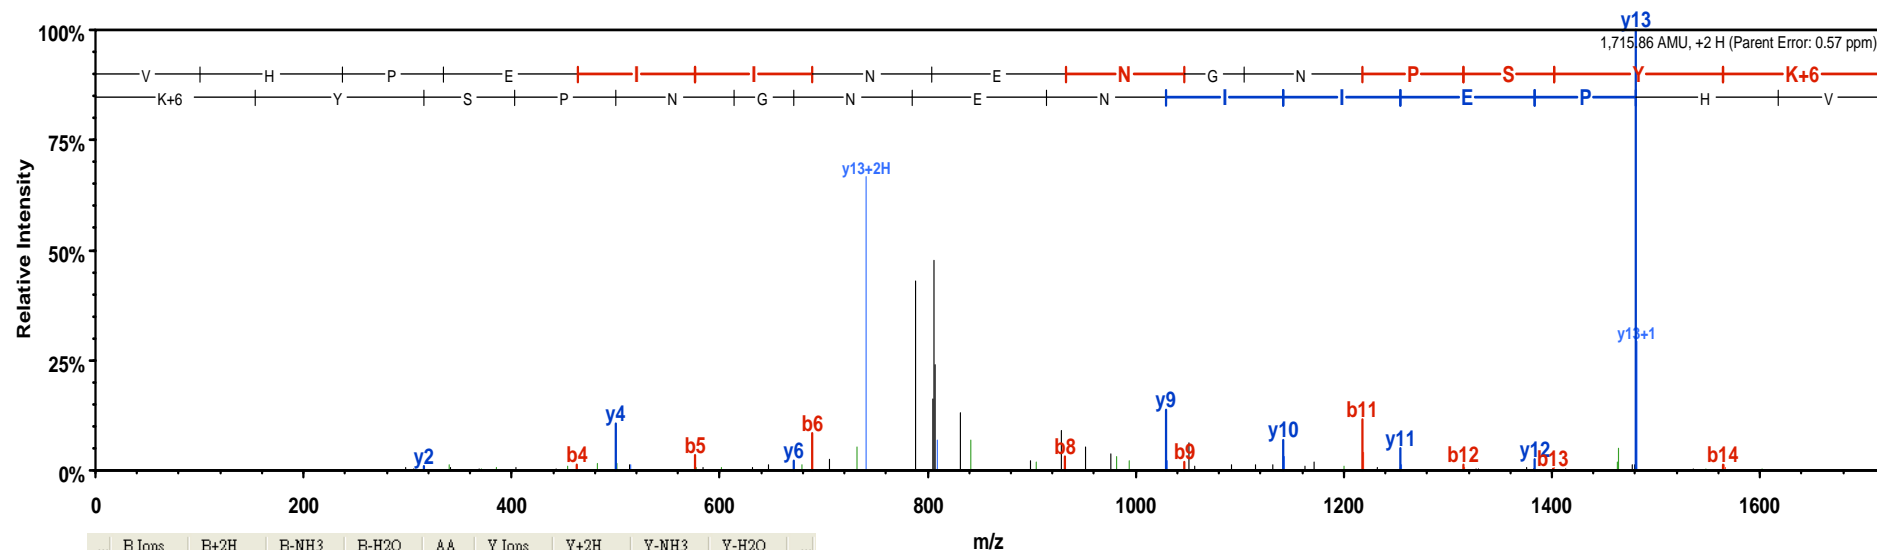

| ... | B Ions  | B+2H  | B-NH3   | B-H2O   | AA  | Y Ions  | Y+2H  | Y-NH3   | Y-H2O   | ... |
|-----|---------|-------|---------|---------|-----|---------|-------|---------|---------|-----|
| 1   | 100.1   |       |         |         | V   | 1,716.9 | 858.9 | 1,699.8 | 1,698.9 | 15  |
| 2   | 237.1   | 119.1 |         |         | H   | 1,617.8 | 809.4 | 1,600.8 | 1,599.8 | 14  |
| 3   | 334.2   | 167.6 |         |         | P   | 1,480.7 | 740.9 | 1,463.7 | 1,462.7 | 13  |
| 4   | 463.2   | 232.1 |         | 445.2   | E   | 1,383.7 | 692.3 | 1,366.7 | 1,365.7 | 12  |
| 5   | 576.3   | 288.7 |         | 558.3   | I   | 1,254.6 | 627.8 | 1,237.6 | 1,236.6 | 11  |
| 6   | 689.4   | 345.2 |         | 671.4   | I   | 1,141.6 | 571.3 | 1,124.5 | 1,123.5 | 10  |
| 7   | 803.4   | 402.2 | 786.4   | 785.4   | N   | 1,028.5 | 514.7 | 1,011.4 | 1,010.5 | 9   |
| 8   | 932.5   | 466.7 | 915.5   | 914.5   | E   | 914.4   | 457.7 | 897.4   | 896.4   | 8   |
| 9   | 1,046.5 | 523.8 | 1,029.5 | 1,028.5 | N   | 785.4   | 393.2 | 768.4   | 767.4   | 7   |
| 10  | 1,103.5 | 552.3 | 1,086.5 | 1,085.5 | G   | 671.3   | 336.2 | 654.3   | 653.3   | 6   |
| 11  | 1,217.6 | 609.3 | 1,200.6 | 1,199.6 | N   | 614.3   |       | 597.3   | 596.3   | 5   |
| 12  | 1,314.6 | 657.8 | 1,297.6 | 1,296.6 | P   | 500.3   |       | 483.3   | 482.3   | 4   |
| 13  | 1,401.7 | 701.3 | 1,384.6 | 1,383.7 | S   | 403.2   |       | 386.2   | 385.2   | 3   |
| 14  | 1,564.7 | 782.9 | 1,547.7 | 1,546.7 | Y   | 316.2   |       | 299.2   |         | 2   |
| 15  | 1,716.9 | 858.9 | 1,699.8 | 1,698.9 | K+6 | 153.1   |       | 136.1   |         | 1   |

# Whole proteome

| Protein No. | Leading protein name  | Sequence     | Mascot Score | Variable Modifications   | SILAC State | Charge | m/z       |
|-------------|-----------------------|--------------|--------------|--------------------------|-------------|--------|-----------|
| W-92        | sp O95476 DULRD_HUMAN | QHCTLELGSYIK | 49.94        | Gln->pyro-Glu (N-term Q) | Light       | 2      | 716.35047 |

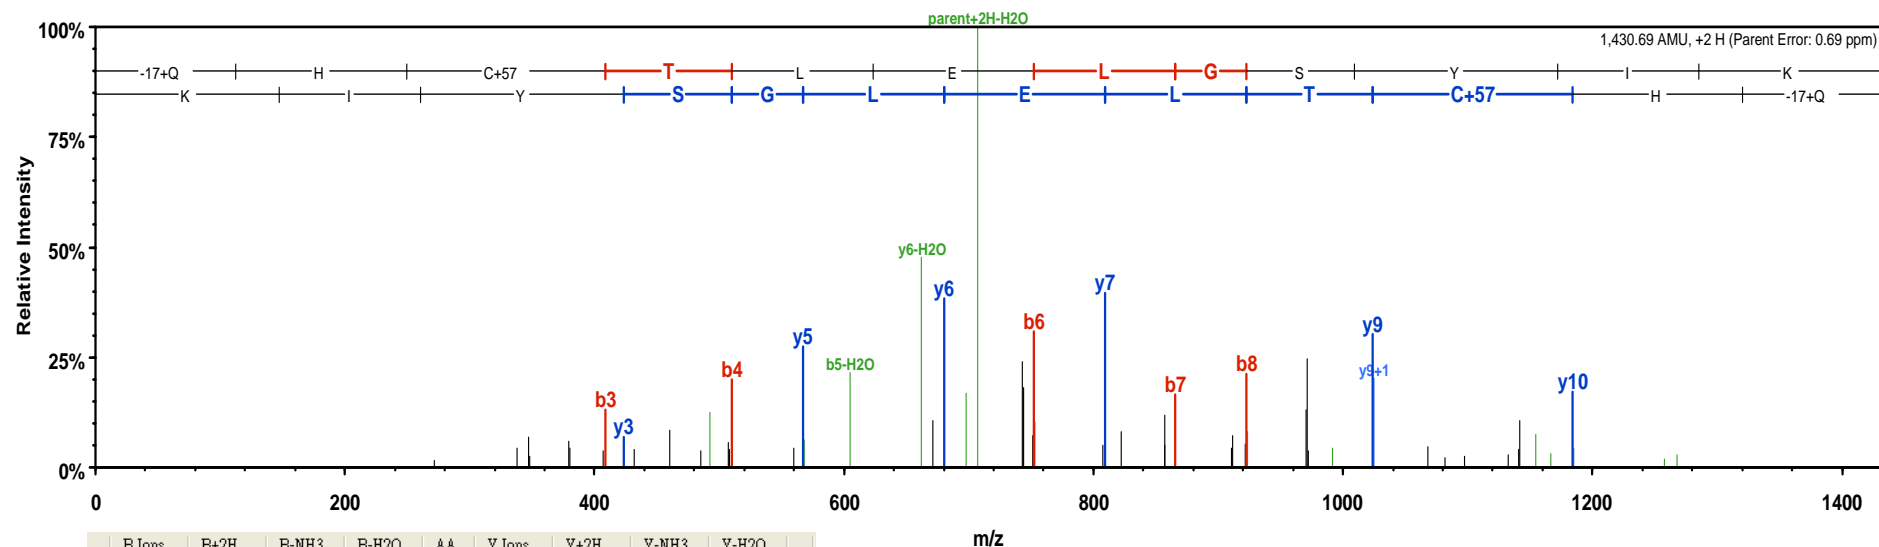

| ... | B Ions  | B+2H  | B-NH3   | B-H2O   | AA   | Y Ions  | Y+2H  | Y-NH3   | Y-H2O   | ... |
|-----|---------|-------|---------|---------|------|---------|-------|---------|---------|-----|
| 1   | 112.0   |       | 95.0    |         | Q-17 | 1,431.7 | 716.4 | 1,414.7 | 1,413.7 | 12  |
| 2   | 249.1   | 125.1 | 232.1   |         | H    | 1,320.7 | 660.8 | 1,303.6 | 1,302.7 | 11  |
| 3   | 409.1   | 205.1 | 392.1   |         | C+57 | 1,183.6 | 592.3 | 1,166.6 | 1,165.6 | 10  |
| 4   | 510.2   | 255.6 | 493.2   | 492.2   | T    | 1,023.6 | 512.3 | 1,006.5 | 1,005.6 | 9   |
| 5   | 623.3   | 312.1 | 606.2   | 605.3   | L    | 922.5   | 461.8 | 905.5   | 904.5   | 8   |
| 6   | 752.3   | 376.7 | 735.3   | 734.3   | E    | 809.4   | 405.2 | 792.4   | 791.4   | 7   |
| 7   | 865.4   | 433.2 | 848.4   | 847.4   | L    | 680.4   | 340.7 | 663.4   | 662.4   | 6   |
| 8   | 922.4   | 461.7 | 905.4   | 904.4   | G    | 567.3   |       | 550.3   | 549.3   | 5   |
| 9   | 1,009.4 | 505.2 | 992.4   | 991.4   | S    | 510.3   |       | 493.3   | 492.3   | 4   |
| 10  | 1,172.5 | 586.8 | 1,155.5 | 1,154.5 | Y    | 423.3   |       | 406.2   |         | 3   |
| 11  | 1,285.6 | 643.3 | 1,268.6 | 1,267.6 | I    | 260.2   |       | 243.2   |         | 2   |
| 12  | 1,431.7 | 716.4 | 1,414.7 | 1,413.7 | K    | 147.1   |       | 130.1   |         | 1   |

# Whole proteome

| Protein No. | Leading protein name  | Sequence        | Mascot Score | Variable Modifications | SILAC State | Charge | m/z       |
|-------------|-----------------------|-----------------|--------------|------------------------|-------------|--------|-----------|
| W-93        | sp Q12791 KCMA1_HUMAN | LIQFSEILQFLNILK | 49.53        | Unmodified             | Light       | 2      | 910.04003 |

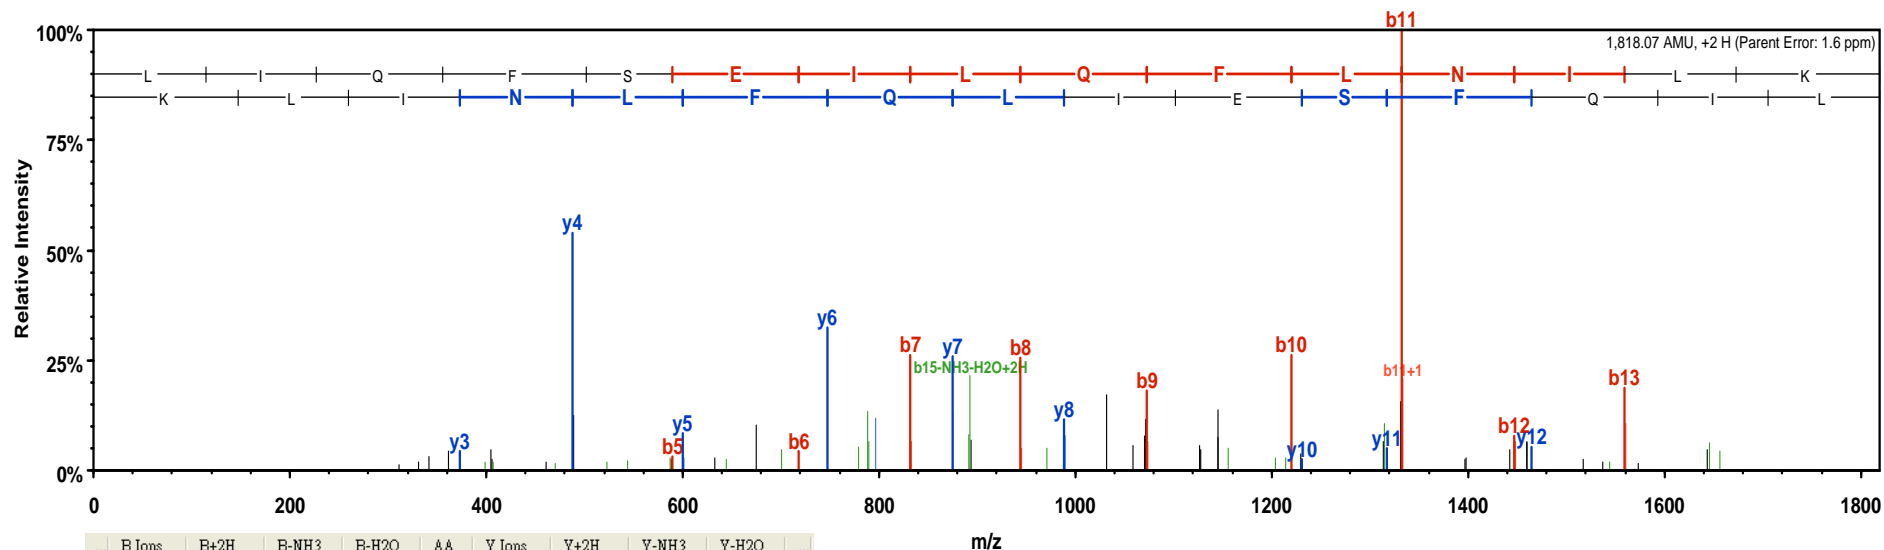

| ... | B Ions  | B+2H  | B-NH3   | B-H2O   | AA | Y Ions  | Y+2H  | Y-NH3   | Y-H2O   | ... |
|-----|---------|-------|---------|---------|----|---------|-------|---------|---------|-----|
| 1   | 114.1   |       |         |         | L  | 1,819.1 | 910.0 | 1,802.0 | 1,801.1 | 15  |
| 2   | 227.2   |       |         |         | I  | 1,706.0 | 853.5 | 1,689.0 | 1,688.0 | 14  |
| 3   | 355.2   |       | 338.2   |         | Q  | 1,592.9 | 797.0 | 1,575.9 | 1,574.9 | 13  |
| 4   | 502.3   |       | 485.3   |         | F  | 1,464.8 | 732.9 | 1,447.8 | 1,446.8 | 12  |
| 5   | 589.3   |       | 572.3   | 571.3   | S  | 1,317.8 | 659.4 | 1,300.8 | 1,299.8 | 11  |
| 6   | 718.4   | 359.7 | 701.4   | 700.4   | E  | 1,230.7 | 615.9 | 1,213.7 | 1,212.7 | 10  |
| 7   | 831.5   | 416.2 | 814.4   | 813.5   | I  | 1,101.7 | 551.4 | 1,084.7 |         | 9   |
| 8   | 944.5   | 472.8 | 927.5   | 926.5   | L  | 988.6   | 494.8 | 971.6   |         | 8   |
| 9   | 1,072.6 | 536.8 | 1,055.6 | 1,054.6 | Q  | 875.5   | 438.3 | 858.5   |         | 7   |
| 10  | 1,219.7 | 610.3 | 1,202.6 | 1,201.7 | F  | 747.5   | 374.2 | 730.4   |         | 6   |
| 11  | 1,332.8 | 666.9 | 1,315.7 | 1,314.7 | L  | 600.4   |       | 583.4   |         | 5   |
| 12  | 1,446.8 | 723.9 | 1,429.8 | 1,428.8 | N  | 487.3   |       | 470.3   |         | 4   |
| 13  | 1,559.9 | 780.4 | 1,542.9 | 1,541.9 | I  | 373.3   |       | 356.3   |         | 3   |
| 14  | 1,673.0 | 837.0 | 1,655.9 | 1,655.0 | L  | 260.2   |       | 243.2   |         | 2   |
| 15  | 1,819.1 | 910.0 | 1,802.0 | 1,801.1 | K  | 147.1   |       | 130.1   |         | 1   |

# Whole proteome

| Protein No. | Leading protein name  | Sequence                    | Mascot Score | Variable Modifications | SILAC State | Charge | m/z       |
|-------------|-----------------------|-----------------------------|--------------|------------------------|-------------|--------|-----------|
| W-94        | sp O14521 HDHSD_HUMAN | AGLLALSALTFAGLCYFNYHVDVGICK | 49.45        | Unmodified             | Light       | 3      | 958.81542 |

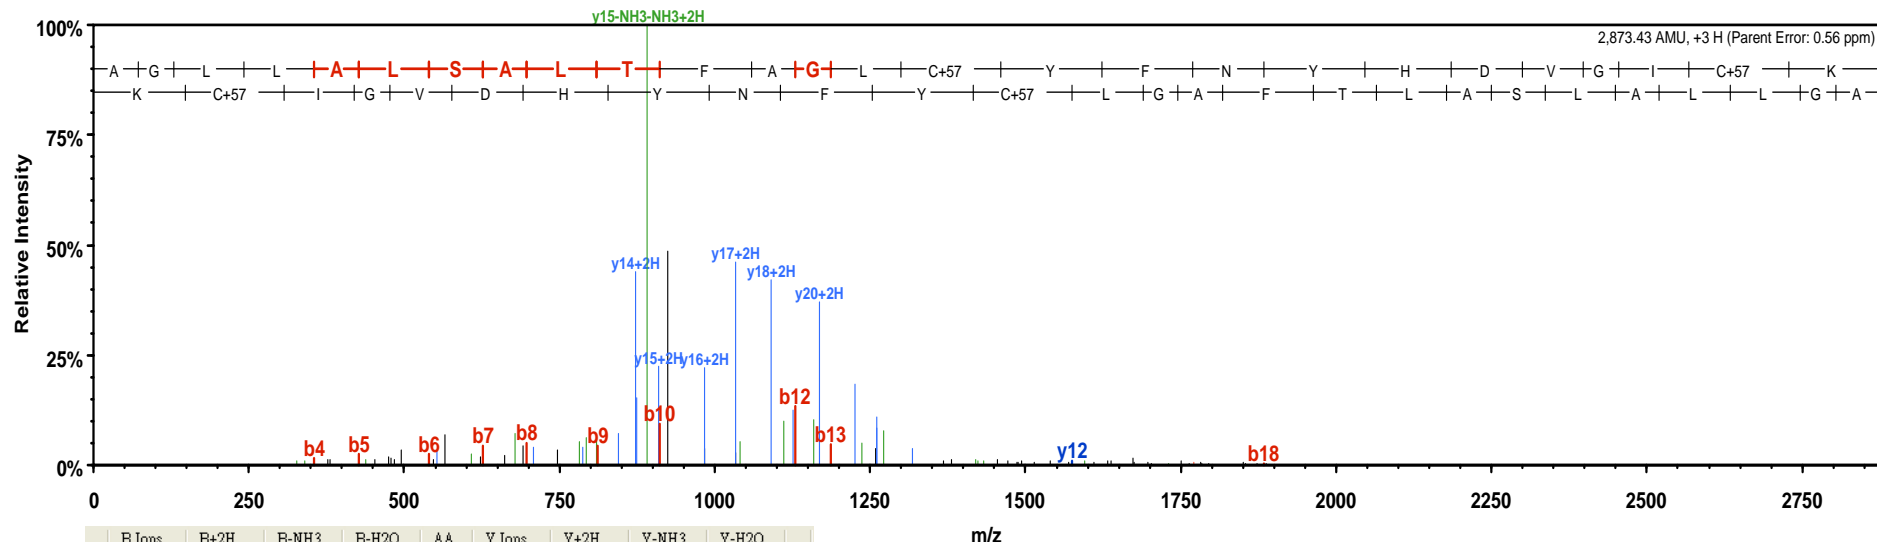

| ... | B Ions  | B+2H    | B-NH3   | B-H2O   | AA   | Y Ions  | Y+2H    | Y-NH3   | Y-H2O   | ... |
|-----|---------|---------|---------|---------|------|---------|---------|---------|---------|-----|
| 1   | 72.0    |         |         |         | A    | 2,874.4 | 1,437.7 | 2,857.4 | 2,856.4 | 26  |
| 2   | 129.1   |         |         |         | G    | 2,803.4 | 1,402.2 | 2,786.4 | 2,785.4 | 25  |
| 3   | 242.1   |         |         |         | L    | 2,746.4 | 1,373.7 | 2,729.3 | 2,728.4 | 24  |
| 4   | 355.2   |         |         |         | L    | 2,633.3 | 1,317.1 | 2,616.3 | 2,615.3 | 23  |
| 5   | 426.3   |         |         |         | A    | 2,520.2 | 1,260.6 | 2,503.2 | 2,502.2 | 22  |
| 6   | 539.4   | 270.2   |         |         | L    | 2,449.2 | 1,225.1 | 2,432.1 | 2,431.2 | 21  |
| 7   | 626.4   | 313.7   |         | 608.4   | S    | 2,336.1 | 1,168.5 | 2,319.1 | 2,318.1 | 20  |
| 8   | 697.4   | 349.2   |         | 679.4   | A    | 2,249.1 | 1,125.0 | 2,232.0 | 2,231.0 | 19  |
| 9   | 810.5   | 405.8   |         | 792.5   | L    | 2,178.0 | 1,089.5 | 2,161.0 | 2,160.0 | 18  |
| 10  | 911.6   | 456.3   |         | 893.5   | T    | 2,064.9 | 1,033.0 | 2,047.9 | 2,046.9 | 17  |
| 11  | 1,058.6 | 529.8   |         | 1,040.6 | F    | 1,963.9 | 982.4   | 1,946.9 | 1,945.9 | 16  |
| 12  | 1,129.7 | 565.3   |         | 1,111.7 | A    | 1,816.8 | 908.9   | 1,799.8 | 1,798.8 | 15  |
| 13  | 1,186.7 | 593.8   |         | 1,168.7 | G    | 1,745.8 | 873.4   | 1,728.8 | 1,727.8 | 14  |
| 14  | 1,299.8 | 650.4   |         | 1,281.8 | L    | 1,688.8 | 844.9   | 1,671.7 | 1,670.7 | 13  |
| 15  | 1,459.8 | 730.4   |         | 1,441.8 | C+57 | 1,575.7 | 788.3   | 1,558.6 | 1,557.7 | 12  |
| 16  | 1,622.9 | 811.9   |         | 1,604.9 | Y    | 1,415.6 | 708.3   | 1,398.6 | 1,397.6 | 11  |
| 17  | 1,769.9 | 885.5   |         | 1,751.9 | F    | 1,252.6 | 626.8   | 1,235.6 | 1,234.6 | 10  |
| 18  | 1,884.0 | 942.5   | 1,866.9 | 1,866.0 | N    | 1,105.5 | 553.3   | 1,088.5 | 1,087.5 | 9   |
| 19  | 2,047.0 | 1,024.0 | 2,030.0 | 2,029.0 | Y    | 991.5   | 496.2   | 974.4   | 973.5   | 8   |
| 20  | 2,184.1 | 1,092.6 | 2,167.1 | 2,166.1 | H    | 828.4   | 414.7   | 811.4   | 810.4   | 7   |
| 21  | 2,299.1 | 1,150.1 | 2,282.1 | 2,281.1 | D    | 691.3   | 346.2   | 674.3   | 673.3   | 6   |
| 22  | 2,398.2 | 1,199.6 | 2,381.2 | 2,380.2 | V    | 576.3   |         | 559.3   |         | 5   |
| 23  | 2,455.2 | 1,228.1 | 2,438.2 | 2,437.2 | G    | 477.2   |         | 460.2   |         | 4   |
| 24  | 2,568.3 | 1,284.7 | 2,551.3 | 2,550.3 | I    | 420.2   |         | 403.2   |         | 3   |
| 25  | 2,728.3 | 1,364.7 | 2,711.3 | 2,710.3 | C+57 | 307.1   |         | 290.1   |         | 2   |
| 26  | 2,874.4 | 1,437.7 | 2,857.4 | 2,856.4 | K    | 147.1   |         | 130.1   |         | 1   |

# Whole proteome

| Protein No. | Leading protein name  | Sequence      | Mascot Score | Variable Modifications | SILAC State | Charge | m/z       |
|-------------|-----------------------|---------------|--------------|------------------------|-------------|--------|-----------|
| W-95        | splP62834IRAP1A_HUMAN | QWCNCAFLESSAK | 48.95        | Unmodified             | Light       | 2      | 800.84777 |

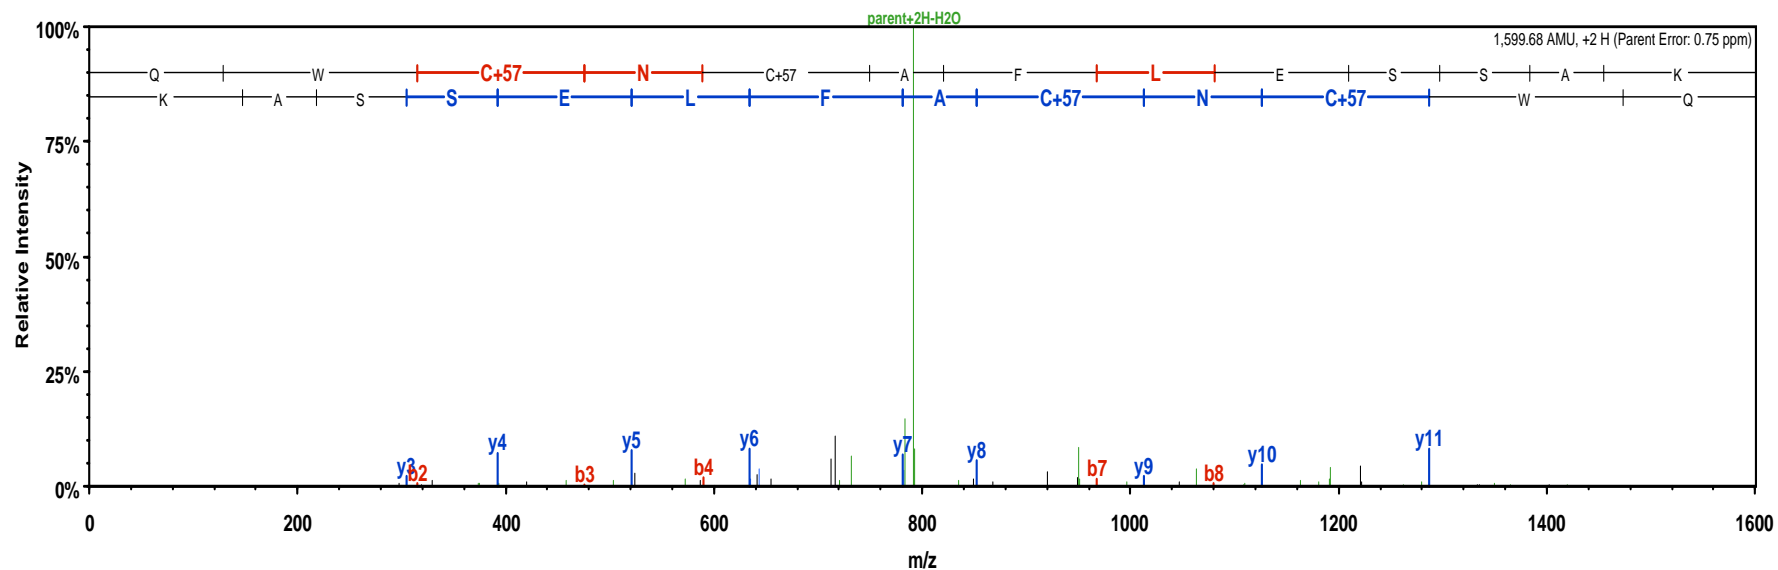

| ... | B Ions  | B+2H  | B-NH <sub>3</sub> | B-H <sub>2</sub> O | AA   | Y Ions  | Y+2H  | Y-NH <sub>3</sub> | Y-H <sub>2</sub> O | ... |
|-----|---------|-------|-------------------|--------------------|------|---------|-------|-------------------|--------------------|-----|
| 1   | 129.1   |       | 112.0             |                    | Q    | 1,600.7 | 800.8 | 1,583.7           | 1,582.7            | 13  |
| 2   | 315.1   |       | 298.1             |                    | W    | 1,472.6 | 736.8 | 1,455.6           | 1,454.6            | 12  |
| 3   | 475.2   |       | 458.1             |                    | C+57 | 1,286.6 | 643.8 | 1,269.5           | 1,268.5            | 11  |
| 4   | 589.2   |       | 572.2             |                    | N    | 1,126.5 | 563.8 | 1,109.5           | 1,108.5            | 10  |
| 5   | 749.2   |       | 732.2             |                    | C+57 | 1,012.5 | 506.7 | 995.5             | 994.5              | 9   |
| 6   | 820.3   | 410.6 | 803.3             |                    | A    | 852.4   | 426.7 | 835.4             | 834.4              | 8   |
| 7   | 967.4   | 484.2 | 950.3             |                    | F    | 781.4   | 391.2 | 764.4             | 763.4              | 7   |
| 8   | 1,080.4 | 540.7 | 1,063.4           |                    | L    | 634.3   | 317.7 | 617.3             | 616.3              | 6   |
| 9   | 1,209.5 | 605.2 | 1,192.5           | 1,191.5            | E    | 521.3   |       | 504.2             | 503.2              | 5   |
| 10  | 1,296.5 | 648.8 | 1,279.5           | 1,278.5            | S    | 392.2   |       | 375.2             | 374.2              | 4   |
| 11  | 1,383.5 | 692.3 | 1,366.5           | 1,365.5            | S    | 305.2   |       | 288.2             | 287.2              | 3   |
| 12  | 1,454.6 | 727.8 | 1,437.6           | 1,436.6            | A    | 218.1   |       | 201.1             |                    | 2   |
| 13  | 1,600.7 | 800.8 | 1,583.7           | 1,582.7            | K    | 147.1   |       | 130.1             |                    | 1   |



# Whole proteome

| Protein No. | Leading protein name  | Sequence              | Mascot Score | Variable Modifications | SILAC State | Charge | m/z      |
|-------------|-----------------------|-----------------------|--------------|------------------------|-------------|--------|----------|
| W-96        | splQ96CU9IFXRD1_HUMAN | SPTEQEEDPANLEVDHDFQDK | 48.94        | Unmodified             | Light       | 3      | 896.3963 |

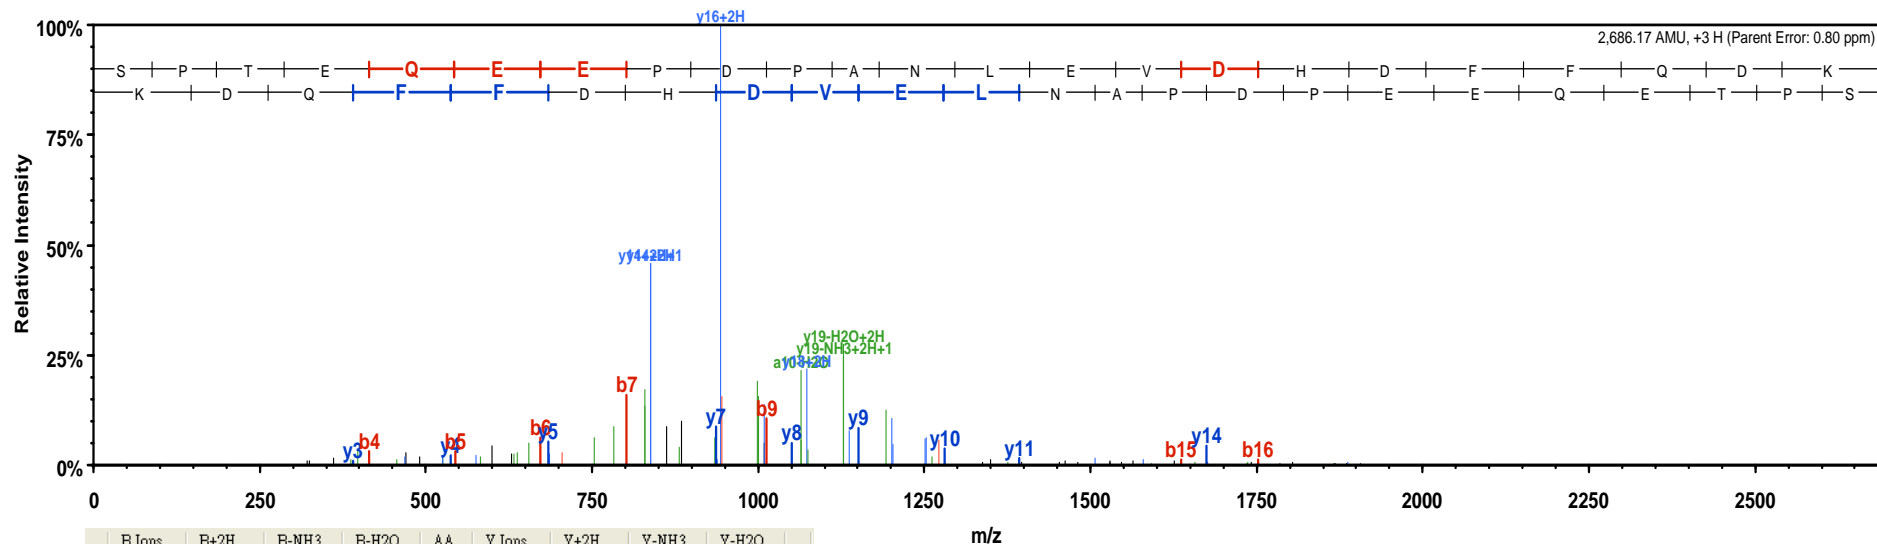

| ... | B Ions  | B+2H    | B-NH3   | B-H2O   | AA | Y Ions  | Y+2H    | Y-NH3   | Y-H2O   | ... |
|-----|---------|---------|---------|---------|----|---------|---------|---------|---------|-----|
| 1   | 88.0    |         |         | 70.0    | S  | 2,687.2 | 1,344.1 | 2,670.1 | 2,669.2 | 23  |
| 2   | 185.1   |         |         | 167.1   | P  | 2,600.1 | 1,300.6 | 2,583.1 | 2,582.1 | 22  |
| 3   | 286.1   |         |         | 268.1   | T  | 2,503.1 | 1,252.0 | 2,486.1 | 2,485.1 | 21  |
| 4   | 415.2   |         |         | 397.2   | E  | 2,402.0 | 1,201.5 | 2,385.0 | 2,384.0 | 20  |
| 5   | 543.2   |         | 526.2   | 525.2   | Q  | 2,273.0 | 1,137.0 | 2,256.0 | 2,255.0 | 19  |
| 6   | 672.3   | 336.6   | 655.3   | 654.3   | E  | 2,144.9 | 1,073.0 | 2,127.9 | 2,126.9 | 18  |
| 7   | 801.3   | 401.2   | 784.3   | 783.3   | E  | 2,015.9 | 1,008.5 | 1,998.9 | 1,997.9 | 17  |
| 8   | 898.4   | 449.7   | 881.4   | 880.4   | P  | 1,886.9 | 943.9   | 1,869.8 | 1,868.8 | 16  |
| 9   | 1,013.4 | 507.2   | 996.4   | 995.4   | D  | 1,789.8 | 895.4   | 1,772.8 | 1,771.8 | 15  |
| 10  | 1,110.5 | 555.7   | 1,093.4 | 1,092.4 | P  | 1,674.8 | 837.9   | 1,657.7 | 1,656.8 | 14  |
| 11  | 1,181.5 | 591.3   | 1,164.5 | 1,163.5 | A  | 1,577.7 | 789.4   | 1,560.7 | 1,559.7 | 13  |
| 12  | 1,295.5 | 648.3   | 1,278.5 | 1,277.5 | N  | 1,506.7 | 753.8   | 1,489.7 | 1,488.7 | 12  |
| 13  | 1,408.6 | 704.8   | 1,391.6 | 1,390.6 | L  | 1,392.6 | 696.8   | 1,375.6 | 1,374.6 | 11  |
| 14  | 1,537.7 | 769.3   | 1,520.6 | 1,519.7 | E  | 1,279.6 | 640.3   | 1,262.5 | 1,261.5 | 10  |
| 15  | 1,636.7 | 818.9   | 1,619.7 | 1,618.7 | V  | 1,150.5 | 575.8   | 1,133.5 | 1,132.5 | 9   |
| 16  | 1,751.8 | 876.4   | 1,734.7 | 1,733.8 | D  | 1,051.4 | 526.2   | 1,034.4 | 1,033.4 | 8   |
| 17  | 1,888.8 | 944.9   | 1,871.8 | 1,870.8 | H  | 936.4   | 468.7   | 919.4   | 918.4   | 7   |
| 18  | 2,003.8 | 1,002.4 | 1,986.8 | 1,985.8 | D  | 799.4   | 400.2   | 782.3   | 781.4   | 6   |
| 19  | 2,150.9 | 1,076.0 | 2,133.9 | 2,132.9 | F  | 684.3   |         | 667.3   | 666.3   | 5   |
| 20  | 2,298.0 | 1,149.5 | 2,281.0 | 2,280.0 | F  | 537.3   |         | 520.2   | 519.3   | 4   |
| 21  | 2,426.0 | 1,213.5 | 2,409.0 | 2,408.0 | Q  | 390.2   |         | 373.2   | 372.2   | 3   |
| 22  | 2,541.1 | 1,271.0 | 2,524.0 | 2,523.1 | D  | 262.1   |         | 245.1   | 244.1   | 2   |
| 23  | 2,687.2 | 1,344.1 | 2,670.1 | 2,669.2 | K  | 147.1   |         | 130.1   |         | 1   |

# Whole proteome

| Protein No. | Leading protein name  | Sequence                | Mascot Score | Variable Modifications | SILAC State | Charge | m/z       |
|-------------|-----------------------|-------------------------|--------------|------------------------|-------------|--------|-----------|
| W-97        | sp P49407 ARRB1_HUMAN | DFVDHIDLVPVDGVVLVDPEYLK | 47.1         | Unmodified             | Light       | 3      | 904.46533 |

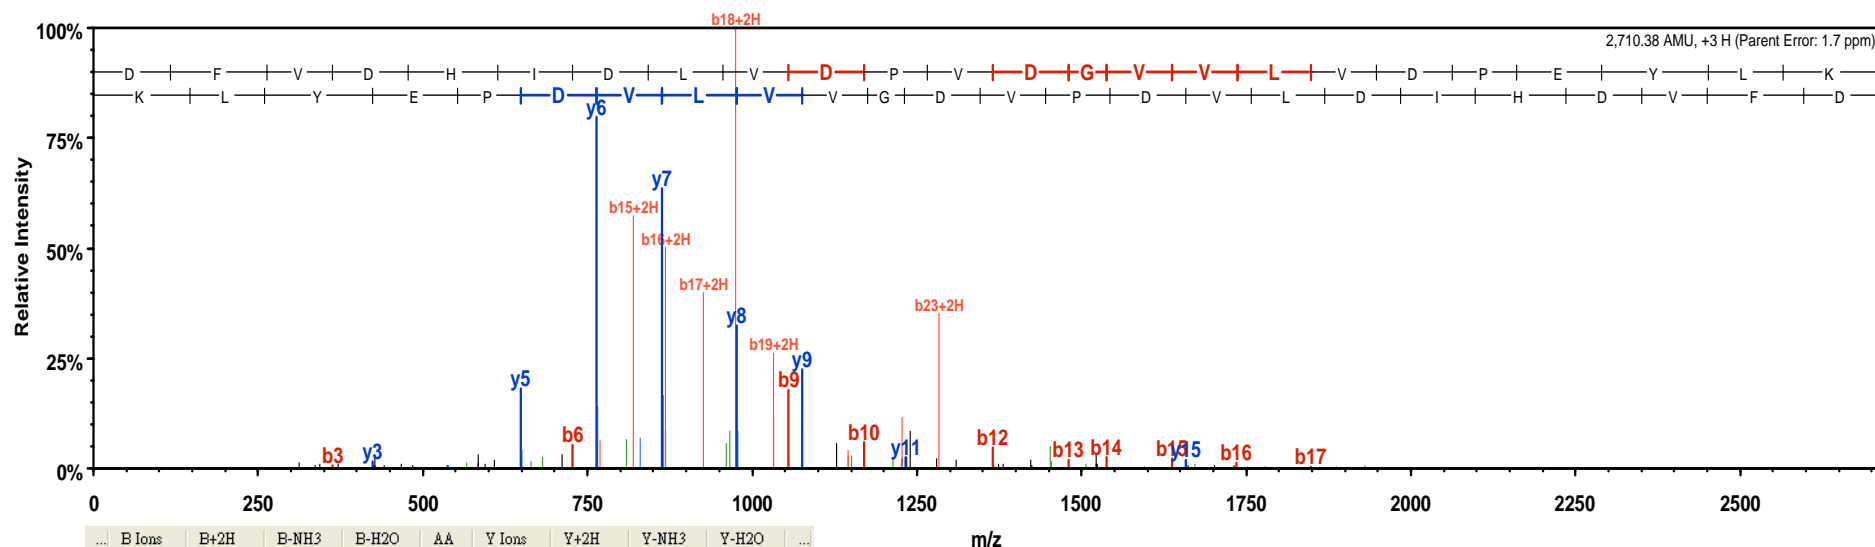

| ... | B Ions  | B+2H    | B-NH3   | B-H2O   | AA | Y Ions  | Y+2H    | Y-NH3   | Y-H2O   | ... |
|-----|---------|---------|---------|---------|----|---------|---------|---------|---------|-----|
| 1   | 116.0   |         |         | 98.0    | D  | 2,711.4 | 1,356.2 | 2,694.4 | 2,693.4 | 24  |
| 2   | 263.1   |         |         | 245.1   | F  | 2,596.4 | 1,298.7 | 2,579.3 | 2,578.3 | 23  |
| 3   | 362.2   |         |         | 344.2   | V  | 2,449.3 | 1,225.1 | 2,432.3 | 2,431.3 | 22  |
| 4   | 477.2   |         |         | 459.2   | D  | 2,350.2 | 1,175.6 | 2,333.2 | 2,332.2 | 21  |
| 5   | 614.3   | 307.6   |         | 596.2   | H  | 2,235.2 | 1,118.1 | 2,218.2 | 2,217.2 | 20  |
| 6   | 727.3   | 364.2   |         | 709.3   | I  | 2,098.1 | 1,049.6 | 2,081.1 | 2,080.1 | 19  |
| 7   | 842.4   | 421.7   |         | 824.4   | D  | 1,985.0 | 993.0   | 1,968.0 | 1,967.0 | 18  |
| 8   | 955.5   | 478.2   |         | 937.4   | L  | 1,870.0 | 935.5   | 1,853.0 | 1,852.0 | 17  |
| 9   | 1,054.5 | 527.8   |         | 1,036.5 | V  | 1,756.9 | 879.0   | 1,739.9 | 1,738.9 | 16  |
| 10  | 1,169.5 | 585.3   |         | 1,151.5 | D  | 1,657.9 | 829.4   | 1,640.8 | 1,639.9 | 15  |
| 11  | 1,266.6 | 633.8   |         | 1,248.6 | P  | 1,542.8 | 771.9   | 1,525.8 | 1,524.8 | 14  |
| 12  | 1,365.7 | 683.3   |         | 1,347.7 | V  | 1,445.8 | 723.4   | 1,428.8 | 1,427.8 | 13  |
| 13  | 1,480.7 | 740.9   |         | 1,462.7 | D  | 1,346.7 | 673.9   | 1,329.7 | 1,328.7 | 12  |
| 14  | 1,537.7 | 769.4   |         | 1,519.7 | G  | 1,231.7 | 616.4   | 1,214.7 | 1,213.7 | 11  |
| 15  | 1,636.8 | 818.9   |         | 1,618.8 | V  | 1,174.7 | 587.8   | 1,157.6 | 1,156.7 | 10  |
| 16  | 1,735.9 | 868.4   |         | 1,717.8 | V  | 1,075.6 | 538.3   | 1,058.6 | 1,057.6 | 9   |
| 17  | 1,848.9 | 925.0   |         | 1,830.9 | L  | 976.5   | 488.8   | 959.5   | 958.5   | 8   |
| 18  | 1,948.0 | 974.5   |         | 1,930.0 | V  | 863.5   | 432.2   | 846.4   | 845.4   | 7   |
| 19  | 2,063.0 | 1,032.0 |         | 2,045.0 | D  | 764.4   | 382.7   | 747.4   | 746.4   | 6   |
| 20  | 2,160.1 | 1,080.5 |         | 2,142.1 | P  | 649.4   |         | 632.3   | 631.3   | 5   |
| 21  | 2,289.1 | 1,145.1 |         | 2,271.1 | E  | 552.3   |         | 535.3   | 534.3   | 4   |
| 22  | 2,452.2 | 1,226.6 |         | 2,434.2 | V  | 423.3   |         | 406.2   |         | 3   |
| 23  | 2,565.3 | 1,283.1 |         | 2,547.3 | L  | 260.2   |         | 243.2   |         | 2   |
| 24  | 2,711.4 | 1,356.2 | 2,694.4 | 2,693.4 | K  | 147.1   |         | 130.1   |         | 1   |

# Whole proteome

| Protein No. | Leading protein name  | Sequence                     | Mascot Score | Variable Modifications | SILAC State | Charge | m/z       |
|-------------|-----------------------|------------------------------|--------------|------------------------|-------------|--------|-----------|
| W-98        | spIQ9UBS9ICA009_HUMAN | QTLISVVDSSSLPEVKKEEQSPEDALLR | 46.92        | Unmodified             | Light       | 3      | 1033.5295 |

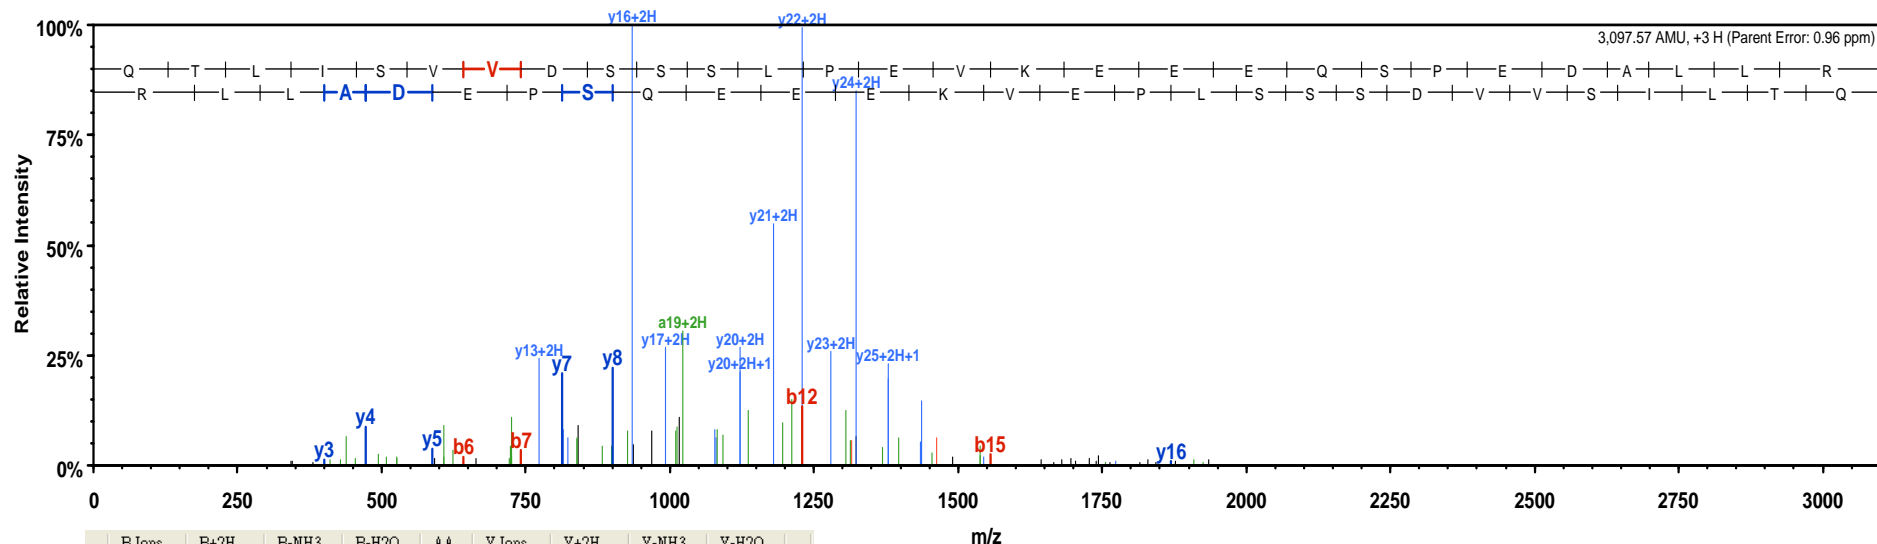

| ... | B Ions  | B+2H    | B-NH3   | B-H2O   | AA | Y Ions  | Y+2H    | Y-NH3   | Y-H2O   | ... |
|-----|---------|---------|---------|---------|----|---------|---------|---------|---------|-----|
| 1   | 129.1   |         | 112.0   |         | Q  | 3,098.6 | 1,549.8 | 3,081.5 | 3,080.6 | 28  |
| 2   | 230.1   |         | 213.1   | 212.1   | T  | 2,970.5 | 1,485.8 | 2,953.5 | 2,952.5 | 27  |
| 3   | 343.2   |         | 326.2   | 325.2   | L  | 2,869.5 | 1,435.2 | 2,852.4 | 2,851.5 | 26  |
| 4   | 456.3   |         | 439.3   | 438.3   | I  | 2,756.4 | 1,378.7 | 2,739.4 | 2,738.4 | 25  |
| 5   | 543.3   |         | 526.3   | 525.3   | S  | 2,643.3 | 1,322.2 | 2,626.3 | 2,625.3 | 24  |
| 6   | 642.4   | 321.7   | 625.4   | 624.4   | V  | 2,556.3 | 1,278.6 | 2,539.2 | 2,538.3 | 23  |
| 7   | 741.5   | 371.2   | 724.4   | 723.4   | V  | 2,457.2 | 1,229.1 | 2,440.2 | 2,439.2 | 22  |
| 8   | 856.5   | 428.7   | 839.5   | 838.5   | D  | 2,358.1 | 1,179.6 | 2,341.1 | 2,340.1 | 21  |
| 9   | 943.5   | 472.3   | 926.5   | 925.5   | S  | 2,243.1 | 1,122.1 | 2,226.1 | 2,225.1 | 20  |
| 10  | 1,030.5 | 515.8   | 1,013.5 | 1,012.5 | S  | 2,156.1 | 1,078.5 | 2,139.0 | 2,138.1 | 19  |
| 11  | 1,117.6 | 559.3   | 1,100.5 | 1,099.6 | S  | 2,069.0 | 1,035.0 | 2,052.0 | 2,051.0 | 18  |
| 12  | 1,230.7 | 615.8   | 1,213.6 | 1,212.6 | L  | 1,982.0 | 991.5   | 1,965.0 | 1,964.0 | 17  |
| 13  | 1,327.7 | 664.4   | 1,310.7 | 1,309.7 | P  | 1,868.9 | 935.0   | 1,851.9 | 1,850.9 | 16  |
| 14  | 1,456.8 | 728.9   | 1,439.7 | 1,438.7 | E  | 1,771.9 | 886.4   | 1,754.8 | 1,753.9 | 15  |
| 15  | 1,555.8 | 778.4   | 1,538.8 | 1,537.8 | V  | 1,642.8 | 821.9   | 1,625.8 | 1,624.8 | 14  |
| 16  | 1,683.9 | 842.5   | 1,666.9 | 1,665.9 | K  | 1,543.8 | 772.4   | 1,526.7 | 1,525.7 | 13  |
| 17  | 1,813.0 | 907.0   | 1,795.9 | 1,794.9 | E  | 1,415.7 | 708.3   | 1,398.6 | 1,397.7 | 12  |
| 18  | 1,942.0 | 971.5   | 1,925.0 | 1,924.0 | E  | 1,286.6 | 643.8   | 1,269.6 | 1,268.6 | 11  |
| 19  | 2,071.0 | 1,036.0 | 2,054.0 | 2,053.0 | E  | 1,157.6 | 579.3   | 1,140.6 | 1,139.6 | 10  |
| 20  | 2,199.1 | 1,100.1 | 2,182.1 | 2,181.1 | Q  | 1,028.5 | 514.8   | 1,011.5 | 1,010.5 | 9   |
| 21  | 2,286.1 | 1,143.6 | 2,269.1 | 2,268.1 | S  | 900.5   | 450.7   | 883.5   | 882.5   | 8   |
| 22  | 2,383.2 | 1,192.1 | 2,366.2 | 2,365.2 | P  | 813.4   | 407.2   | 796.4   | 795.4   | 7   |
| 23  | 2,512.2 | 1,256.6 | 2,495.2 | 2,494.2 | E  | 716.4   | 358.7   | 699.4   | 698.4   | 6   |
| 24  | 2,627.3 | 1,314.1 | 2,610.2 | 2,609.2 | D  | 587.4   |         | 570.3   | 569.3   | 5   |
| 25  | 2,698.3 | 1,349.7 | 2,681.3 | 2,680.3 | A  | 472.3   |         | 455.3   |         | 4   |
| 26  | 2,811.4 | 1,406.2 | 2,794.4 | 2,793.4 | L  | 401.3   |         | 384.3   |         | 3   |
| 27  | 2,924.5 | 1,462.7 | 2,907.4 | 2,906.5 | L  | 288.2   |         | 271.2   |         | 2   |
| 28  | 3,098.6 | 1,549.8 | 3,081.5 | 3,080.6 | R  | 175.1   |         | 158.1   |         | 1   |

# Whole proteome

| Protein No. | Leading protein name  | Sequence        | Mascot Score | Variable Modifications  | SILAC State | Charge | m/z       |
|-------------|-----------------------|-----------------|--------------|-------------------------|-------------|--------|-----------|
| W-99        | splO60518 RNBP6_HUMAN | AATASAGVPATVSEK | 45.75        | Acetyl (Protein N-term) | Heavy       | 2      | 701.36464 |

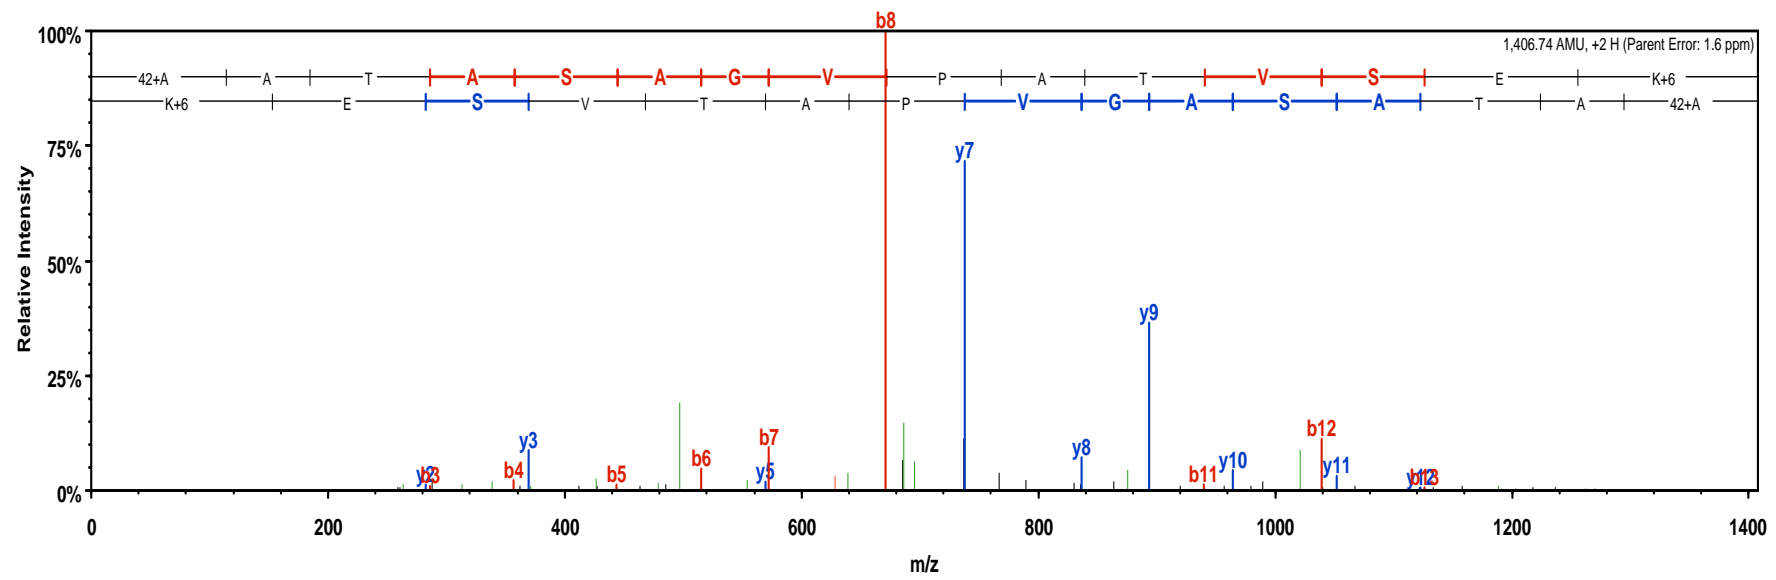

| ... | B Ions  | B+2H  | B-NH3   | B-H2O   | AA   | Y Ions  | Y+2H  | Y-NH3   | Y-H2O   | ... |
|-----|---------|-------|---------|---------|------|---------|-------|---------|---------|-----|
| 1   | 114.1   |       |         |         | A+42 | 1,407.7 | 704.4 | 1,390.7 | 1,389.7 | 15  |
| 2   | 185.1   |       |         |         | A    | 1,294.7 | 647.9 | 1,277.7 | 1,276.7 | 14  |
| 3   | 286.1   |       |         | 268.1   | T    | 1,223.7 | 612.3 | 1,206.6 | 1,205.6 | 13  |
| 4   | 357.2   |       |         | 339.2   | A    | 1,122.6 | 561.8 | 1,105.6 | 1,104.6 | 12  |
| 5   | 444.2   |       |         | 426.2   | S    | 1,051.6 | 526.3 | 1,034.5 | 1,033.6 | 11  |
| 6   | 515.2   | 258.1 |         | 497.2   | A    | 964.5   | 482.8 | 947.5   | 946.5   | 10  |
| 7   | 572.3   | 286.6 |         | 554.3   | G    | 893.5   | 447.3 | 876.5   | 875.5   | 9   |
| 8   | 671.3   | 336.2 |         | 653.3   | V    | 836.5   | 418.7 | 819.5   | 818.5   | 8   |
| 9   | 768.4   | 384.7 |         | 750.4   | P    | 737.4   | 369.2 | 720.4   | 719.4   | 7   |
| 10  | 839.4   | 420.2 |         | 821.4   | A    | 640.4   | 320.7 | 623.3   | 622.4   | 6   |
| 11  | 940.5   | 470.7 |         | 922.5   | T    | 569.3   |       | 552.3   | 551.3   | 5   |
| 12  | 1,039.5 | 520.3 |         | 1,021.5 | V    | 468.3   |       | 451.2   | 450.3   | 4   |
| 13  | 1,126.6 | 563.8 |         | 1,108.6 | S    | 369.2   |       | 352.2   | 351.2   | 3   |
| 14  | 1,255.6 | 628.3 |         | 1,237.6 | E    | 282.2   |       | 265.1   | 264.2   | 2   |
| 15  | 1,407.7 | 704.4 | 1,390.7 | 1,389.7 | K+6  | 153.1   |       | 136.1   |         | 1   |

# Whole proteome

| Protein No. | Leading protein name  | Sequence          | Mascot Score | Variable Modifications | SILAC State | Charge | m/z       |
|-------------|-----------------------|-------------------|--------------|------------------------|-------------|--------|-----------|
| W-100       | splQ9NP66IHM20A_HUMAN | SVFDIPIFTEEFLNHSK | 45.48        | Unmodified             | Heavy       | 2      | 1012.0122 |

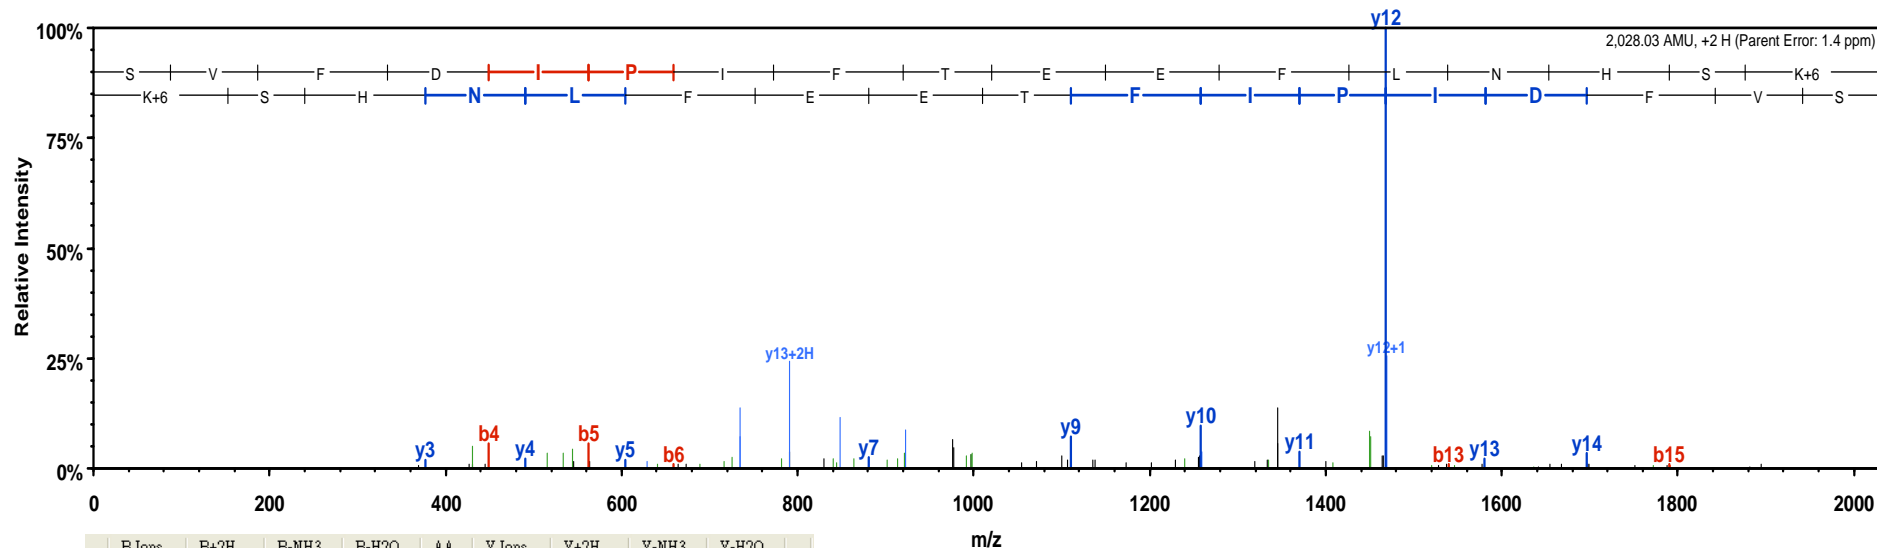

| ... | E Ions  | B+2H    | B-NH3   | B-H2O   | AA  | Y Ions  | Y+2H    | Y-NH3   | Y-H2O   | ... |
|-----|---------|---------|---------|---------|-----|---------|---------|---------|---------|-----|
| 1   | 88.0    |         |         | 70.0    | S   | 2,029.0 | 1,015.0 | 2,012.0 | 2,011.0 | 17  |
| 2   | 187.1   |         |         | 169.1   | V   | 1,942.0 | 971.5   | 1,925.0 | 1,924.0 | 16  |
| 3   | 334.2   |         |         | 316.2   | F   | 1,842.9 | 922.0   | 1,825.9 | 1,824.9 | 15  |
| 4   | 449.2   |         |         | 431.2   | D   | 1,695.9 | 848.4   | 1,678.8 | 1,677.9 | 14  |
| 5   | 562.3   |         |         | 544.3   | I   | 1,580.8 | 790.9   | 1,563.8 | 1,562.8 | 13  |
| 6   | 659.3   | 330.2   |         | 641.3   | P   | 1,467.8 | 734.4   | 1,450.7 | 1,449.7 | 12  |
| 7   | 772.4   | 386.7   |         | 754.4   | I   | 1,370.7 | 685.9   | 1,353.7 | 1,352.7 | 11  |
| 8   | 919.5   | 460.2   |         | 901.5   | F   | 1,257.6 | 629.3   | 1,240.6 | 1,239.6 | 10  |
| 9   | 1,020.5 | 510.8   |         | 1,002.5 | T   | 1,110.6 | 555.8   | 1,093.5 | 1,092.5 | 9   |
| 10  | 1,149.6 | 575.3   |         | 1,131.6 | E   | 1,009.5 | 505.3   | 992.5   | 991.5   | 8   |
| 11  | 1,278.6 | 639.8   |         | 1,260.6 | E   | 880.5   | 440.7   | 863.4   | 862.5   | 7   |
| 12  | 1,425.7 | 713.4   |         | 1,407.7 | F   | 751.4   | 376.2   | 734.4   | 733.4   | 6   |
| 13  | 1,538.8 | 769.9   |         | 1,520.8 | L   | 604.4   | 302.7   | 587.3   | 586.3   | 5   |
| 14  | 1,652.8 | 826.9   | 1,635.8 | 1,634.8 | N   | 491.3   | 246.1   | 474.2   | 473.3   | 4   |
| 15  | 1,789.9 | 895.4   | 1,772.9 | 1,771.9 | H   | 377.2   | 189.1   | 360.2   | 359.2   | 3   |
| 16  | 1,876.9 | 939.0   | 1,859.9 | 1,858.9 | S   | 240.2   |         | 223.1   | 222.2   | 2   |
| 17  | 2,029.0 | 1,015.0 | 2,012.0 | 2,011.0 | K+6 | 153.1   |         | 136.1   |         | 1   |

# Whole proteome

| Protein No. | Leading protein name  | Sequence             | Mascot Score | Variable Modifications | SILAC State | Charge | m/z       |
|-------------|-----------------------|----------------------|--------------|------------------------|-------------|--------|-----------|
| W-101       | splA6NIH7IU119B_HUMAN | VTENYLCKPEDNIYSIDFTR | 44.48        | Unmodified             | Light       | 3      | 826.39329 |

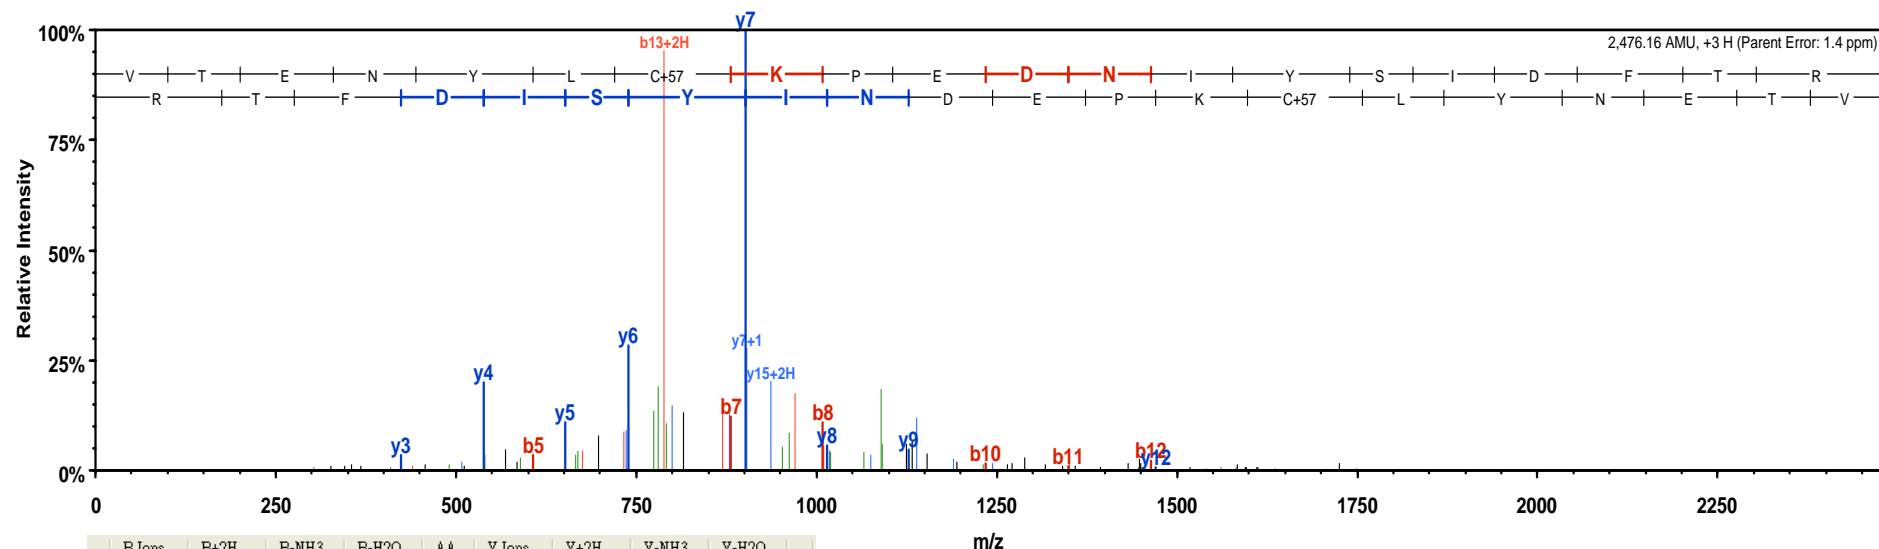

| ... | B Ions  | B+2H    | B-NH3 | B-H2O   | AA   | Y Ions  | Y+2H    | Y-NH3   | Y-H2O   | ... |
|-----|---------|---------|-------|---------|------|---------|---------|---------|---------|-----|
| 1   | 100.1   |         |       |         | V    | 2,477.2 | 1,239.1 | 2,460.1 | 2,459.2 | 20  |
| 2   | 201.1   |         |       | 183.1   | T    | 2,378.1 | 1,189.6 | 2,361.1 | 2,360.1 | 19  |
| 3   | 330.2   |         |       | 312.2   | E    | 2,277.0 | 1,139.0 | 2,260.0 | 2,259.0 | 18  |
| 4   | 444.2   |         |       | 427.2   | N    | 2,148.0 | 1,074.5 | 2,131.0 | 2,130.0 | 17  |
| 5   | 607.3   |         |       | 590.2   | Y    | 2,034.0 | 1,017.5 | 2,016.9 | 2,016.0 | 16  |
| 6   | 720.4   | 360.7   |       | 703.3   | L    | 1,870.9 | 936.0   | 1,853.9 | 1,852.9 | 15  |
| 7   | 880.4   | 440.7   |       | 863.4   | C+57 | 1,757.8 | 879.4   | 1,740.8 | 1,739.8 | 14  |
| 8   | 1,008.5 | 504.7   |       | 991.5   | K    | 1,597.8 | 799.4   | 1,580.8 | 1,579.8 | 13  |
| 9   | 1,105.5 | 553.3   |       | 1,088.5 | P    | 1,469.7 | 735.3   | 1,452.7 | 1,451.7 | 12  |
| 10  | 1,234.6 | 617.8   |       | 1,217.6 | E    | 1,372.6 | 686.8   | 1,355.6 | 1,354.6 | 11  |
| 11  | 1,349.6 | 675.3   |       | 1,332.6 | D    | 1,243.6 | 622.3   | 1,226.6 | 1,225.6 | 10  |
| 12  | 1,463.6 | 732.3   |       | 1,446.6 | N    | 1,128.6 | 564.8   | 1,111.5 | 1,110.6 | 9   |
| 13  | 1,576.7 | 788.9   |       | 1,559.7 | I    | 1,014.5 | 507.8   | 997.5   | 996.5   | 8   |
| 14  | 1,739.8 | 870.4   |       | 1,722.8 | Y    | 901.4   | 451.2   | 884.4   | 883.4   | 7   |
| 15  | 1,826.8 | 913.9   |       | 1,809.8 | S    | 738.4   | 369.7   | 721.4   | 720.4   | 6   |
| 16  | 1,939.9 | 970.5   |       | 1,922.9 | I    | 651.3   |         | 634.3   | 633.3   | 5   |
| 17  | 2,054.9 | 1,028.0 |       | 2,037.9 | D    | 538.3   |         | 521.2   | 520.3   | 4   |
| 18  | 2,202.0 | 1,101.5 |       | 2,185.0 | F    | 423.2   |         | 406.2   | 405.2   | 3   |
| 19  | 2,303.1 | 1,152.0 |       | 2,286.0 | T    | 276.2   |         | 259.1   | 258.2   | 2   |
| 20  | 2,477.2 | 1,239.1 |       | 2,460.1 | R    | 175.1   |         | 158.1   |         | 1   |

# Whole proteome

| Protein No. | Leading protein name  | Sequence             | Mascot Score | Variable Modifications | SILAC State | Charge | m/z       |
|-------------|-----------------------|----------------------|--------------|------------------------|-------------|--------|-----------|
| W-102       | sp Q9H211 ICDT1_HUMAN | PALPATPPATPPAASPSALK | 44.16        | Unmodified             | Light       | 2      | 928.01983 |

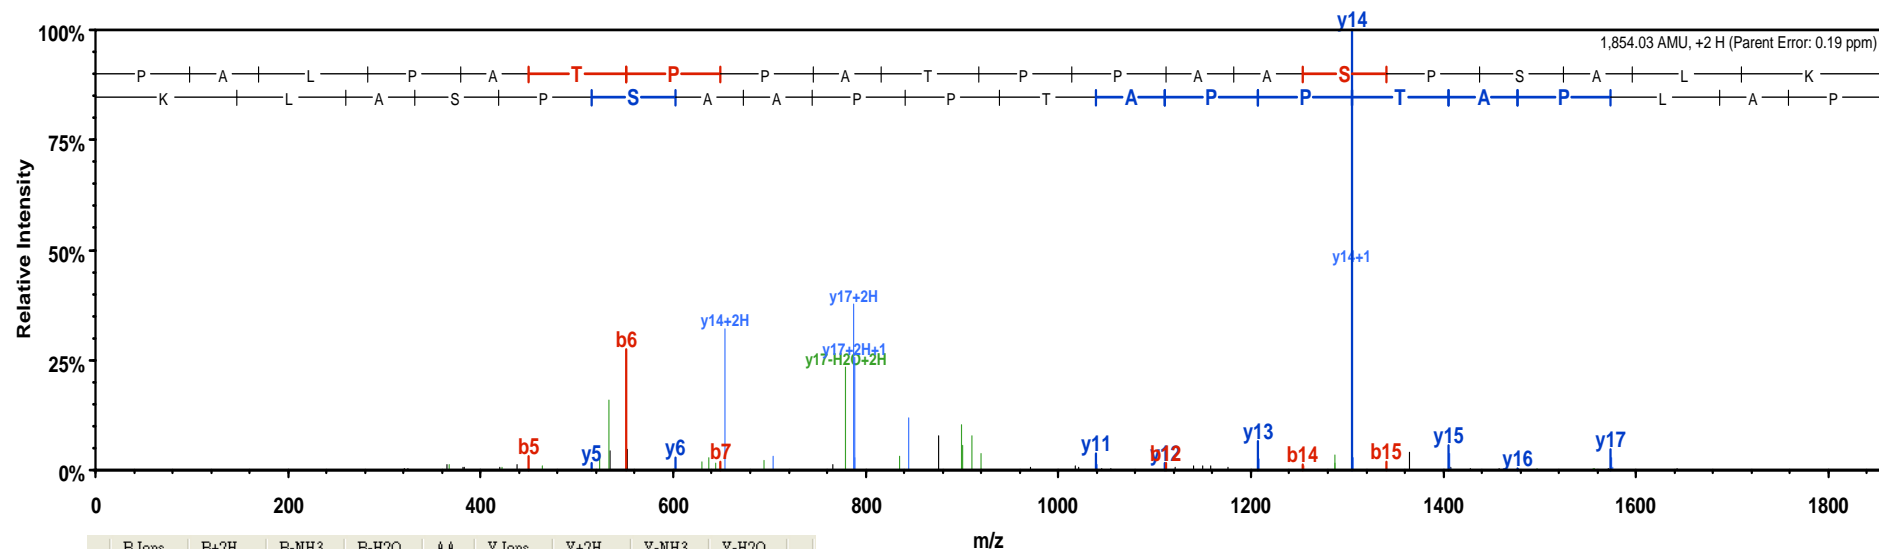

| ... | B Ions  | B+2H  | B-NH3   | B-H2O   | AA | Y Ions  | Y+2H  | Y-NH3   | Y-H2O   | ... |
|-----|---------|-------|---------|---------|----|---------|-------|---------|---------|-----|
| 1   | 98.1    |       |         |         | P  | 1,855.0 | 928.0 | 1,838.0 | 1,837.0 | 20  |
| 2   | 169.1   |       |         |         | A  | 1,758.0 | 879.5 | 1,741.0 | 1,740.0 | 19  |
| 3   | 282.2   |       |         |         | L  | 1,686.9 | 844.0 | 1,669.9 | 1,668.9 | 18  |
| 4   | 379.2   |       |         |         | P  | 1,573.9 | 787.4 | 1,556.8 | 1,555.8 | 17  |
| 5   | 450.3   |       |         |         | A  | 1,476.8 | 738.9 | 1,459.8 | 1,458.8 | 16  |
| 6   | 551.3   | 276.2 |         | 533.3   | T  | 1,405.8 | 703.4 | 1,388.7 | 1,387.8 | 15  |
| 7   | 648.4   | 324.7 |         | 630.4   | P  | 1,304.7 | 652.9 | 1,287.7 | 1,286.7 | 14  |
| 8   | 745.4   | 373.2 |         | 727.4   | P  | 1,207.7 | 604.3 | 1,190.6 | 1,189.7 | 13  |
| 9   | 816.5   | 408.7 |         | 798.5   | A  | 1,110.6 | 555.8 | 1,093.6 | 1,092.6 | 12  |
| 10  | 917.5   | 459.3 |         | 899.5   | T  | 1,039.6 | 520.3 | 1,022.6 | 1,021.6 | 11  |
| 11  | 1,014.6 | 507.8 |         | 996.6   | P  | 938.5   | 469.8 | 921.5   | 920.5   | 10  |
| 12  | 1,111.6 | 556.3 |         | 1,093.6 | P  | 841.5   | 421.2 | 824.5   | 823.5   | 9   |
| 13  | 1,182.7 | 591.8 |         | 1,164.6 | A  | 744.4   | 372.7 | 727.4   | 726.4   | 8   |
| 14  | 1,253.7 | 627.3 |         | 1,235.7 | A  | 673.4   | 337.2 | 656.4   | 655.4   | 7   |
| 15  | 1,340.7 | 670.9 |         | 1,322.7 | S  | 602.4   | 301.7 | 585.3   | 584.3   | 6   |
| 16  | 1,437.8 | 719.4 |         | 1,419.8 | P  | 515.3   |       | 498.3   | 497.3   | 5   |
| 17  | 1,524.8 | 762.9 |         | 1,506.8 | S  | 418.3   |       | 401.2   | 400.3   | 4   |
| 18  | 1,595.8 | 798.4 |         | 1,577.8 | A  | 331.2   |       | 314.2   |         | 3   |
| 19  | 1,708.9 | 855.0 |         | 1,690.9 | L  | 260.2   |       | 243.2   |         | 2   |
| 20  | 1,855.0 | 928.0 | 1,838.0 | 1,837.0 | K  | 147.1   |       | 130.1   |         | 1   |

# Whole proteome

| Protein No. | Leading protein name | Sequence           | Mascot Score | Variable Modifications | SILAC State | Charge | m/z       |
|-------------|----------------------|--------------------|--------------|------------------------|-------------|--------|-----------|
| W-103       | splP25116 PAR1_HUMAN | ESSDPSSYNSSGQLMASK | 43.13        | Unmodified             | Light       | 2      | 937.90727 |

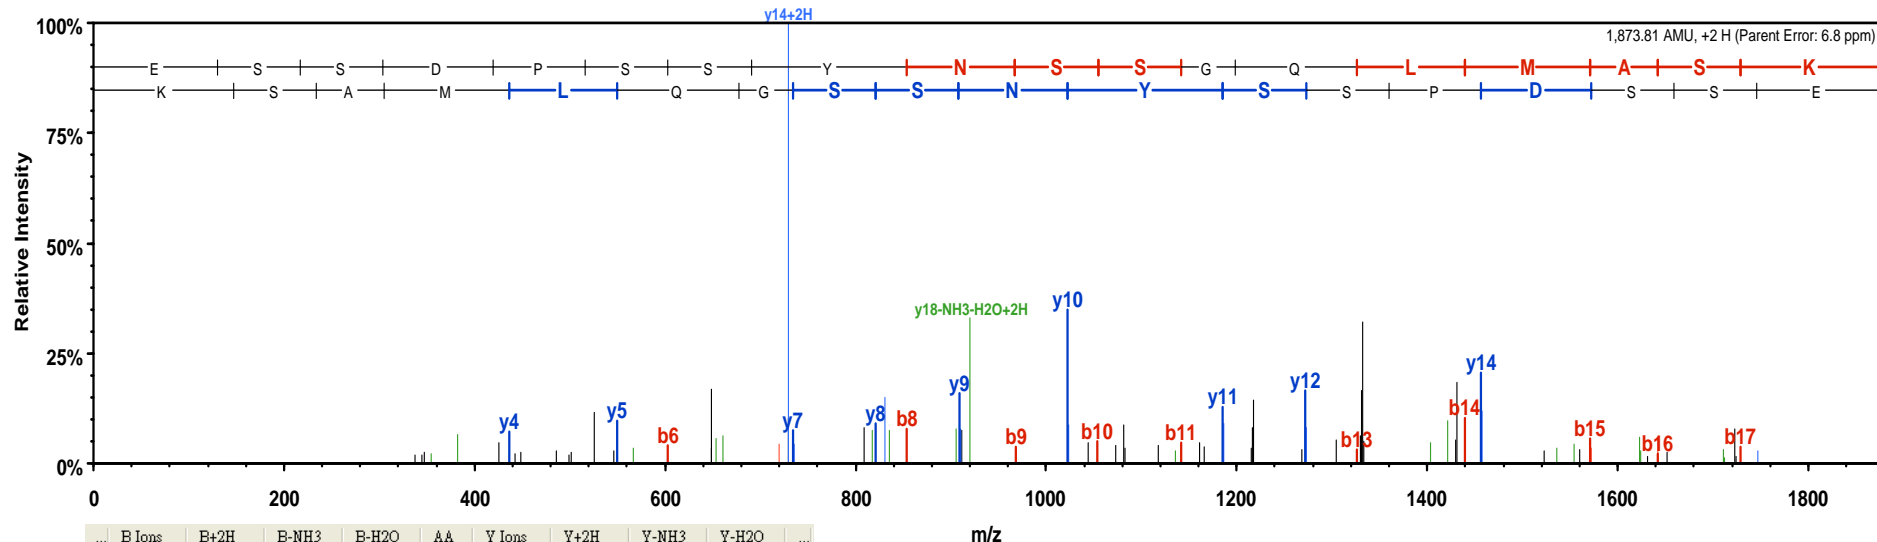

| ... | B Ions  | B+2H  | B-NH3   | B-H2O   | AA | Y Ions  | Y+2H  | Y-NH3   | Y-H2O   | ... |
|-----|---------|-------|---------|---------|----|---------|-------|---------|---------|-----|
| 1   | 130.0   |       |         | 112.0   | E  | 1,874.8 | 937.9 | 1,857.8 | 1,856.8 | 18  |
| 2   | 217.1   |       |         | 199.1   | S  | 1,745.8 | 873.4 | 1,728.7 | 1,727.8 | 17  |
| 3   | 304.1   |       |         | 286.1   | S  | 1,658.7 | 829.9 | 1,641.7 | 1,640.7 | 16  |
| 4   | 419.1   |       |         | 401.1   | D  | 1,571.7 | 786.4 | 1,554.7 | 1,553.7 | 15  |
| 5   | 516.2   |       |         | 498.2   | P  | 1,456.7 | 728.8 | 1,439.6 | 1,438.7 | 14  |
| 6   | 603.2   | 302.1 |         | 585.2   | S  | 1,359.6 | 680.3 | 1,342.6 | 1,341.6 | 13  |
| 7   | 690.3   | 345.6 |         | 672.2   | S  | 1,272.6 | 636.8 | 1,255.6 | 1,254.6 | 12  |
| 8   | 853.3   | 427.2 |         | 835.3   | Y  | 1,185.6 | 593.3 | 1,168.5 | 1,167.5 | 11  |
| 9   | 967.4   | 484.2 | 950.3   | 949.4   | N  | 1,022.5 | 511.8 | 1,005.5 | 1,004.5 | 10  |
| 10  | 1,054.4 | 527.7 | 1,037.4 | 1,036.4 | S  | 908.5   | 454.7 | 891.4   | 890.4   | 9   |
| 11  | 1,141.4 | 571.2 | 1,124.4 | 1,123.4 | S  | 821.4   | 411.2 | 804.4   | 803.4   | 8   |
| 12  | 1,198.4 | 599.7 | 1,181.4 | 1,180.4 | G  | 734.4   | 367.7 | 717.4   | 716.4   | 7   |
| 13  | 1,326.5 | 663.8 | 1,309.5 | 1,308.5 | Q  | 677.4   | 339.2 | 660.3   | 659.4   | 6   |
| 14  | 1,439.6 | 720.3 | 1,422.6 | 1,421.6 | L  | 549.3   |       | 532.3   | 531.3   | 5   |
| 15  | 1,570.6 | 785.8 | 1,553.6 | 1,552.6 | M  | 436.2   |       | 419.2   | 418.2   | 4   |
| 16  | 1,641.7 | 821.3 | 1,624.6 | 1,623.7 | A  | 305.2   |       | 288.2   | 287.2   | 3   |
| 17  | 1,728.7 | 864.9 | 1,711.7 | 1,710.7 | S  | 234.1   |       | 217.1   | 216.1   | 2   |
| 18  | 1,874.8 | 937.9 | 1,857.8 | 1,856.8 | K  | 147.1   |       | 130.1   |         | 1   |



# Whole proteome

| Protein No. | Leading protein name  | Sequence     | Mascot Score | Variable Modifications | SILAC State | Charge | m/z       |
|-------------|-----------------------|--------------|--------------|------------------------|-------------|--------|-----------|
| W-104       | splQ13885ITBB2A_HUMAN | INVYYNEAAGNK | 42.93        | Unmodified             | Light       | 2      | 678.33314 |

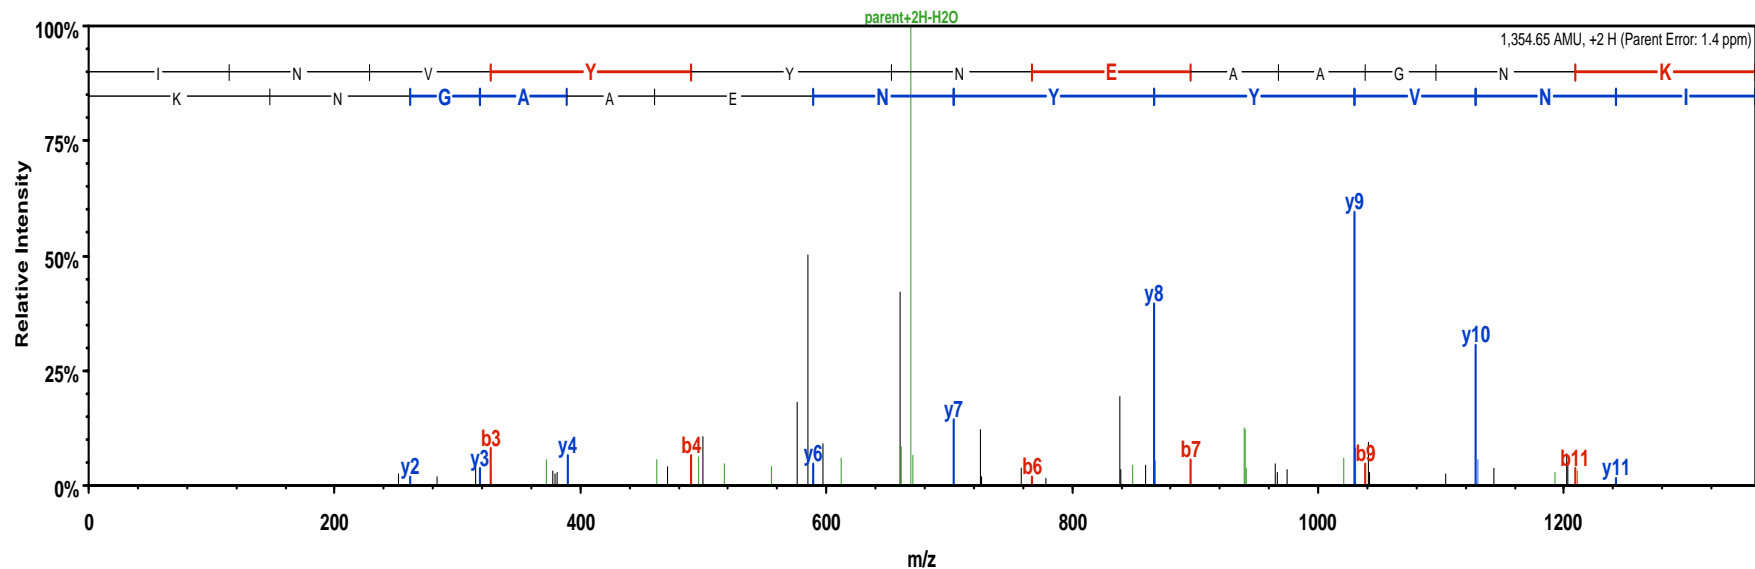

| ... | B Ions  | B+2H  | B-MH3   | B-H2O   | AA | Y Ions  | Y+2H  | Y-NH3   | Y-H2O   | ... |
|-----|---------|-------|---------|---------|----|---------|-------|---------|---------|-----|
| 1   | 114.1   |       |         |         | I  | 1,355.7 | 678.3 | 1,338.6 | 1,337.6 | 12  |
| 2   | 228.1   |       | 211.1   |         | N  | 1,242.6 | 621.8 | 1,225.5 | 1,224.6 | 11  |
| 3   | 327.2   |       | 310.2   |         | V  | 1,128.5 | 564.8 | 1,111.5 | 1,110.5 | 10  |
| 4   | 490.3   |       | 473.2   |         | Y  | 1,029.5 | 515.2 | 1,012.4 | 1,011.5 | 9   |
| 5   | 653.3   |       | 636.3   |         | Y  | 866.4   | 433.7 | 849.4   | 848.4   | 8   |
| 6   | 767.4   | 384.2 | 750.3   |         | N  | 703.3   | 352.2 | 686.3   | 685.3   | 7   |
| 7   | 896.4   | 448.7 | 879.4   | 878.4   | E  | 589.3   | 295.2 | 572.3   | 571.3   | 6   |
| 8   | 967.5   | 484.2 | 950.4   | 949.4   | A  | 460.3   |       | 443.2   |         | 5   |
| 9   | 1,038.5 | 519.7 | 1,021.5 | 1,020.5 | A  | 389.2   |       | 372.2   |         | 4   |
| 10  | 1,095.5 | 548.3 | 1,078.5 | 1,077.5 | G  | 318.2   |       | 301.2   |         | 3   |
| 11  | 1,209.6 | 605.3 | 1,192.5 | 1,191.5 | N  | 261.2   |       | 244.1   |         | 2   |
| 12  | 1,355.7 | 678.3 | 1,338.6 | 1,337.6 | K  | 147.1   |       | 130.1   |         | 1   |

# Whole proteome

| Protein No. | Leading protein name  | Sequence           | Mascot Score | Variable Modifications | SILAC State | Charge | m/z      |
|-------------|-----------------------|--------------------|--------------|------------------------|-------------|--------|----------|
| W-105       | sp O43414 PRNIP_HUMAN | GLSLQHIGRPHSGIDDCK | 42.54        | Unmodified             | Heavy       | 2      | 995.4998 |

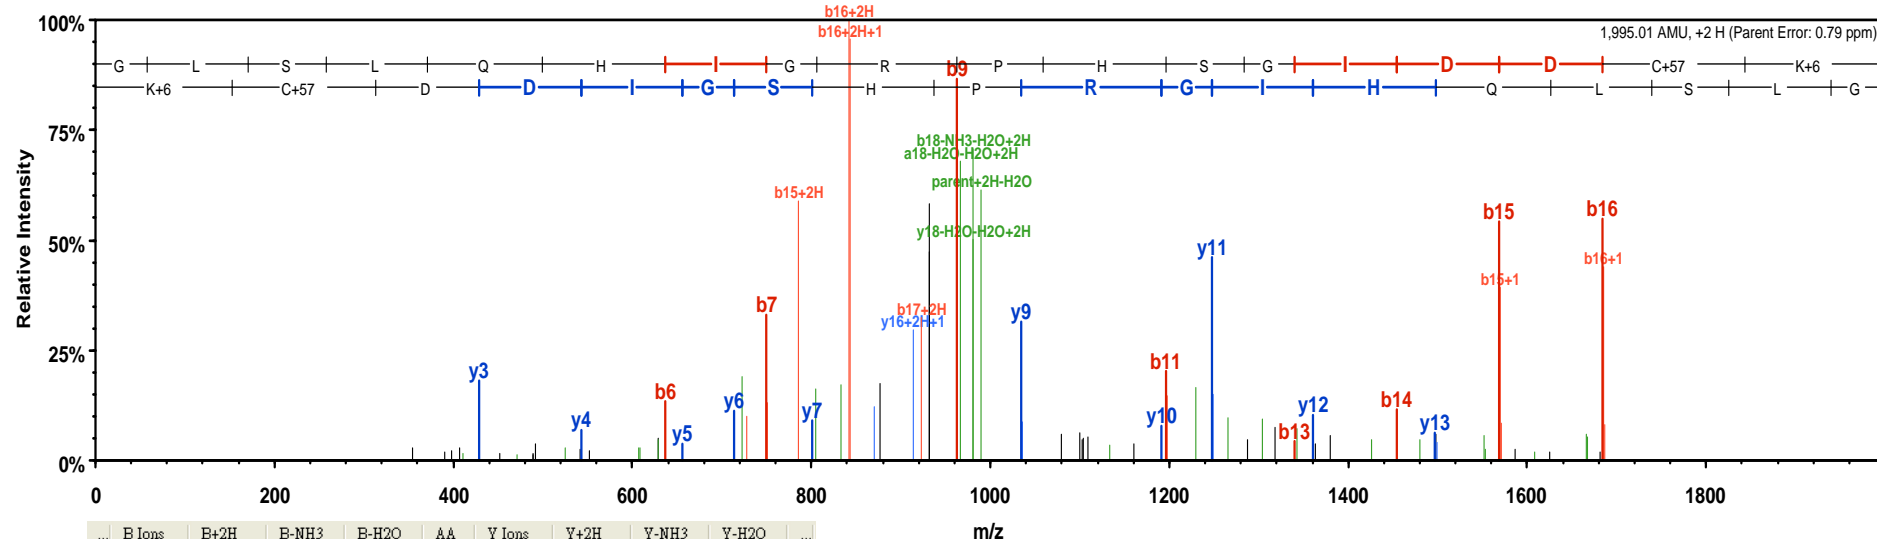

| ... | B Ions  | B+2H  | B-NH3   | B-H2O   | AA   | Y Ions  | Y+2H  | Y-NH3   | Y-H2O   | ... |
|-----|---------|-------|---------|---------|------|---------|-------|---------|---------|-----|
| 1   | 58.0    |       |         |         | G    | 1,996.0 | 998.5 | 1,979.0 | 1,978.0 | 18  |
| 2   | 171.1   |       |         |         | L    | 1,939.0 | 970.0 | 1,922.0 | 1,921.0 | 17  |
| 3   | 258.1   |       |         | 240.1   | S    | 1,825.9 | 913.5 | 1,808.9 | 1,807.9 | 16  |
| 4   | 371.2   |       |         | 353.2   | L    | 1,738.9 | 869.9 | 1,721.8 | 1,720.9 | 15  |
| 5   | 499.3   |       | 482.3   | 481.3   | Q    | 1,625.8 | 813.4 | 1,608.8 | 1,607.8 | 14  |
| 6   | 636.3   | 318.7 | 619.3   | 618.3   | H    | 1,497.7 | 749.4 | 1,480.7 | 1,479.7 | 13  |
| 7   | 749.4   | 375.2 | 732.4   | 731.4   | I    | 1,360.7 | 680.8 | 1,343.6 | 1,342.7 | 12  |
| 8   | 806.5   | 403.7 | 789.4   | 788.4   | G    | 1,247.6 | 624.3 | 1,230.6 | 1,229.6 | 11  |
| 9   | 962.6   | 481.8 | 945.5   | 944.5   | R    | 1,190.6 | 595.8 | 1,173.5 | 1,172.6 | 10  |
| 10  | 1,059.6 | 530.3 | 1,042.6 | 1,041.6 | P    | 1,034.5 | 517.7 | 1,017.4 | 1,016.5 | 9   |
| 11  | 1,196.7 | 598.8 | 1,179.6 | 1,178.7 | H    | 937.4   | 469.2 | 920.4   | 919.4   | 8   |
| 12  | 1,283.7 | 642.4 | 1,266.7 | 1,265.7 | S    | 800.4   | 400.7 | 783.3   | 782.3   | 7   |
| 13  | 1,340.7 | 670.9 | 1,323.7 | 1,322.7 | G    | 713.3   | 357.2 | 696.3   | 695.3   | 6   |
| 14  | 1,453.8 | 727.4 | 1,436.8 | 1,435.8 | I    | 656.3   |       | 639.3   | 638.3   | 5   |
| 15  | 1,568.8 | 784.9 | 1,551.8 | 1,550.8 | D    | 543.2   |       | 526.2   | 525.2   | 4   |
| 16  | 1,683.9 | 842.4 | 1,666.8 | 1,665.8 | D    | 428.2   |       | 411.2   | 410.2   | 3   |
| 17  | 1,843.9 | 922.4 | 1,826.9 | 1,825.9 | C+57 | 313.2   |       | 296.1   |         | 2   |
| 18  | 1,996.0 | 998.5 | 1,979.0 | 1,978.0 | K+6  | 153.1   |       | 136.1   |         | 1   |

# Whole proteome

| Protein No. | Leading protein name   | Sequence                                     | Mascot Score | Variable Modifications | SILAC State | Charge | m/z       |
|-------------|------------------------|----------------------------------------------|--------------|------------------------|-------------|--------|-----------|
| W-106       | sp Q9ULM6 ICNOT6_HUMAN | SSVLGEFGTIPLVLCADLNSLPDSGVVEYLSTGGVETN<br>HK | 42.49        | Unmodified             | Heavy       | 3      | 1392.3666 |

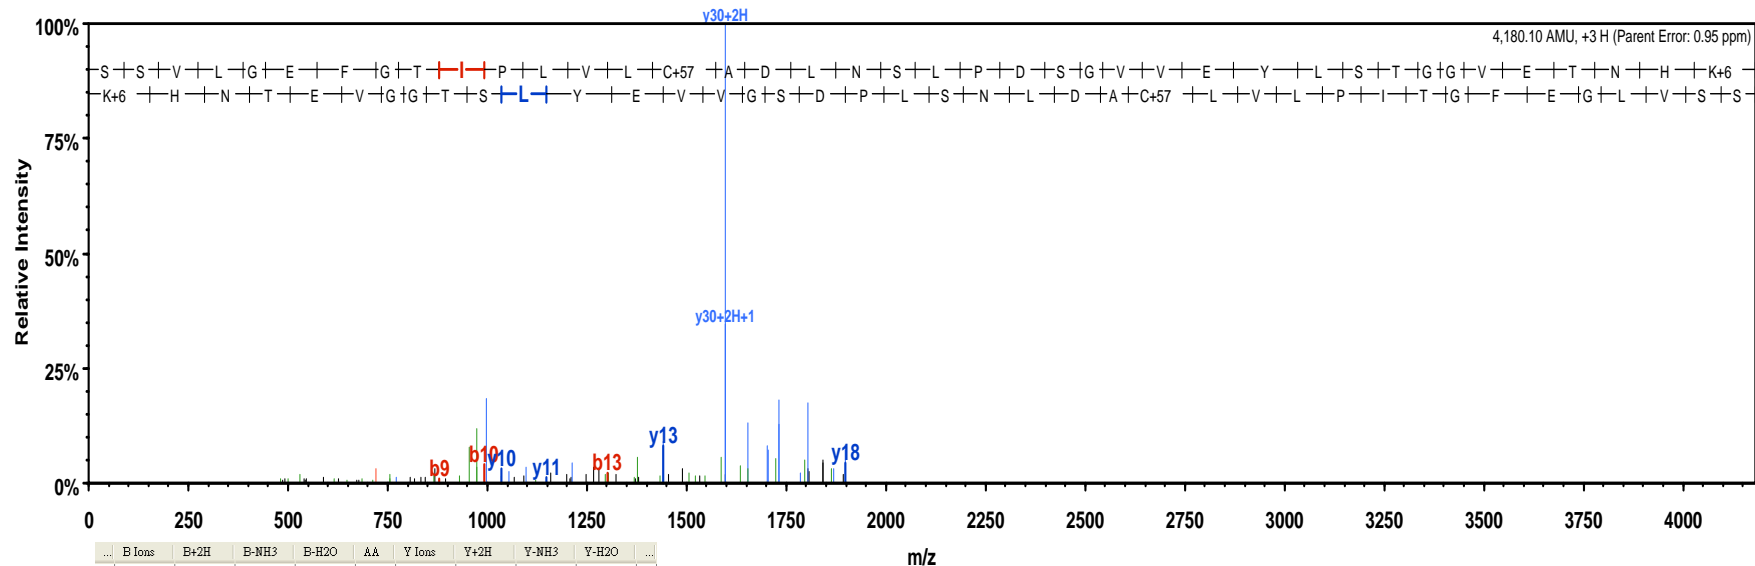

| ... | B Ions  | B+2H    | B-NH3   | B-H2O   | AA   | Y Ions  | Y+2H    | Y-NH3   | Y-H2O   | ... |
|-----|---------|---------|---------|---------|------|---------|---------|---------|---------|-----|
| 1   | 88.0    |         |         | 70.0    | S    | 4,181.1 | 2,091.1 | 4,164.1 | 4,163.1 | 40  |
| 2   | 175.1   |         |         | 157.1   | S    | 4,094.1 | 2,047.5 | 4,077.0 | 4,076.1 | 39  |
| 3   | 274.1   |         |         | 256.1   | V    | 4,007.0 | 2,004.0 | 3,990.0 | 3,989.0 | 38  |
| 4   | 387.2   |         |         | 369.2   | L    | 3,908.0 | 1,954.5 | 3,890.9 | 3,890.0 | 37  |
| 5   | 444.2   |         |         | 426.2   | G    | 3,794.9 | 1,897.9 | 3,777.9 | 3,776.9 | 36  |
| 6   | 573.3   | 287.1   |         | 555.3   | E    | 3,737.9 | 1,869.4 | 3,720.8 | 3,719.9 | 35  |
| 7   | 720.4   | 360.7   |         | 702.3   | F    | 3,608.8 | 1,804.9 | 3,591.8 | 3,590.8 | 34  |
| 8   | 777.4   | 389.2   |         | 759.4   | G    | 3,461.8 | 1,731.4 | 3,444.7 | 3,443.7 | 33  |
| 9   | 878.4   | 439.7   |         | 860.4   | T    | 3,404.7 | 1,702.9 | 3,387.7 | 3,386.7 | 32  |
| 10  | 991.5   | 496.3   |         | 973.5   | I    | 3,303.7 | 1,652.3 | 3,286.7 | 3,285.7 | 31  |
| 11  | 1,088.6 | 544.8   |         | 1,070.6 | P    | 3,190.6 | 1,595.8 | 3,173.6 | 3,172.6 | 30  |
| 12  | 1,201.6 | 601.3   |         | 1,183.6 | L    | 3,093.6 | 1,547.3 | 3,076.5 | 3,075.5 | 29  |
| 13  | 1,300.7 | 650.9   |         | 1,282.7 | V    | 2,980.5 | 1,490.7 | 2,963.4 | 2,962.5 | 28  |
| 14  | 1,413.8 | 707.4   |         | 1,395.8 | L    | 2,881.4 | 1,441.2 | 2,864.4 | 2,863.4 | 27  |
| 15  | 1,573.8 | 787.4   |         | 1,555.8 | C+57 | 2,768.3 | 1,384.7 | 2,751.3 | 2,750.3 | 26  |
| 16  | 1,644.9 | 822.9   |         | 1,626.9 | A    | 2,608.3 | 1,304.6 | 2,591.3 | 2,590.3 | 25  |
| 17  | 1,759.9 | 880.5   |         | 1,741.9 | D    | 2,537.2 | 1,269.1 | 2,520.2 | 2,519.2 | 24  |
| 18  | 1,873.0 | 937.0   |         | 1,855.0 | L    | 2,422.2 | 1,211.6 | 2,405.2 | 2,404.2 | 23  |
| 19  | 1,987.0 | 994.0   | 1,970.0 | 1,969.0 | N    | 2,309.1 | 1,155.1 | 2,292.1 | 2,291.1 | 22  |
| 20  | 2,074.1 | 1,037.5 | 2,057.0 | 2,056.0 | S    | 2,195.1 | 1,098.0 | 2,178.1 | 2,177.1 | 21  |
| 21  | 2,187.1 | 1,094.1 | 2,170.1 | 2,169.1 | L    | 2,108.1 | 1,054.5 | 2,091.0 | 2,090.0 | 20  |
| 22  | 2,284.2 | 1,142.6 | 2,267.2 | 2,266.2 | P    | 1,995.0 | 998.0   | 1,977.9 | 1,977.0 | 19  |
| 23  | 2,399.2 | 1,200.1 | 2,382.2 | 2,381.2 | D    | 1,897.9 | 949.5   | 1,880.9 | 1,879.9 | 18  |
| 24  | 2,486.2 | 1,243.6 | 2,469.2 | 2,468.2 | S    | 1,782.9 | 892.0   | 1,765.9 | 1,764.9 | 17  |
| 25  | 2,543.3 | 1,272.1 | 2,526.2 | 2,525.3 | G    | 1,695.9 | 848.4   | 1,678.8 | 1,677.9 | 16  |
| 26  | 2,642.3 | 1,321.7 | 2,625.3 | 2,624.3 | V    | 1,638.8 | 819.9   | 1,621.8 | 1,620.8 | 15  |
| 27  | 2,741.4 | 1,371.2 | 2,724.4 | 2,723.4 | V    | 1,539.8 | 770.4   | 1,522.7 | 1,521.8 | 14  |
| 28  | 2,870.4 | 1,435.7 | 2,853.4 | 2,852.4 | E    | 1,440.7 | 720.9   | 1,423.7 | 1,422.7 | 13  |
| 29  | 3,033.5 | 1,517.3 | 3,016.5 | 3,015.5 | Y    | 1,311.7 | 656.3   | 1,294.6 | 1,293.7 | 12  |
| 30  | 3,146.6 | 1,573.8 | 3,129.6 | 3,128.6 | L    | 1,148.6 | 574.8   | 1,131.6 | 1,130.6 | 11  |
| 31  | 3,233.6 | 1,617.3 | 3,216.6 | 3,215.6 | S    | 1,035.5 | 518.3   | 1,018.5 | 1,017.5 | 10  |
| 32  | 3,334.7 | 1,667.8 | 3,317.6 | 3,316.7 | T    | 948.5   | 474.7   | 931.5   | 930.5   | 9   |
| 33  | 3,391.7 | 1,696.4 | 3,374.7 | 3,373.7 | G    | 847.4   | 424.2   | 830.4   | 829.4   | 8   |
| 34  | 3,448.7 | 1,724.9 | 3,431.7 | 3,430.7 | G    | 790.4   | 395.7   | 773.4   | 772.4   | 7   |
| 35  | 3,547.8 | 1,774.4 | 3,530.8 | 3,529.8 | V    | 733.4   | 367.2   | 716.4   | 715.4   | 6   |
| 36  | 3,676.8 | 1,838.9 | 3,659.8 | 3,658.8 | E    | 634.3   | 317.7   | 617.3   | 616.3   | 5   |
| 37  | 3,777.9 | 1,889.4 | 3,760.9 | 3,759.9 | T    | 505.3   | 253.1   | 488.3   | 487.3   | 4   |
| 38  | 3,891.9 | 1,946.5 | 3,874.9 | 3,873.9 | N    | 404.2   | 202.6   | 387.2   |         | 3   |
| 39  | 4,029.0 | 2,015.0 | 4,012.0 | 4,011.0 | H    | 290.2   | 145.6   | 273.2   |         | 2   |
| 40  | 4,181.1 | 2,091.1 | 4,164.1 | 4,163.1 | K+6  | 153.1   |         | 136.1   |         | 1   |

# Whole proteome

| Protein No. | Leading protein name | Sequence      | Mascot Score | Variable Modifications | SILAC State | Charge | m/z       |
|-------------|----------------------|---------------|--------------|------------------------|-------------|--------|-----------|
| W-107       | splQ9NP64INO40_HUMAN | YSLIPDEEEEEKK | 42.17        | Unmodified             | Heavy       | 2      | 904.92545 |

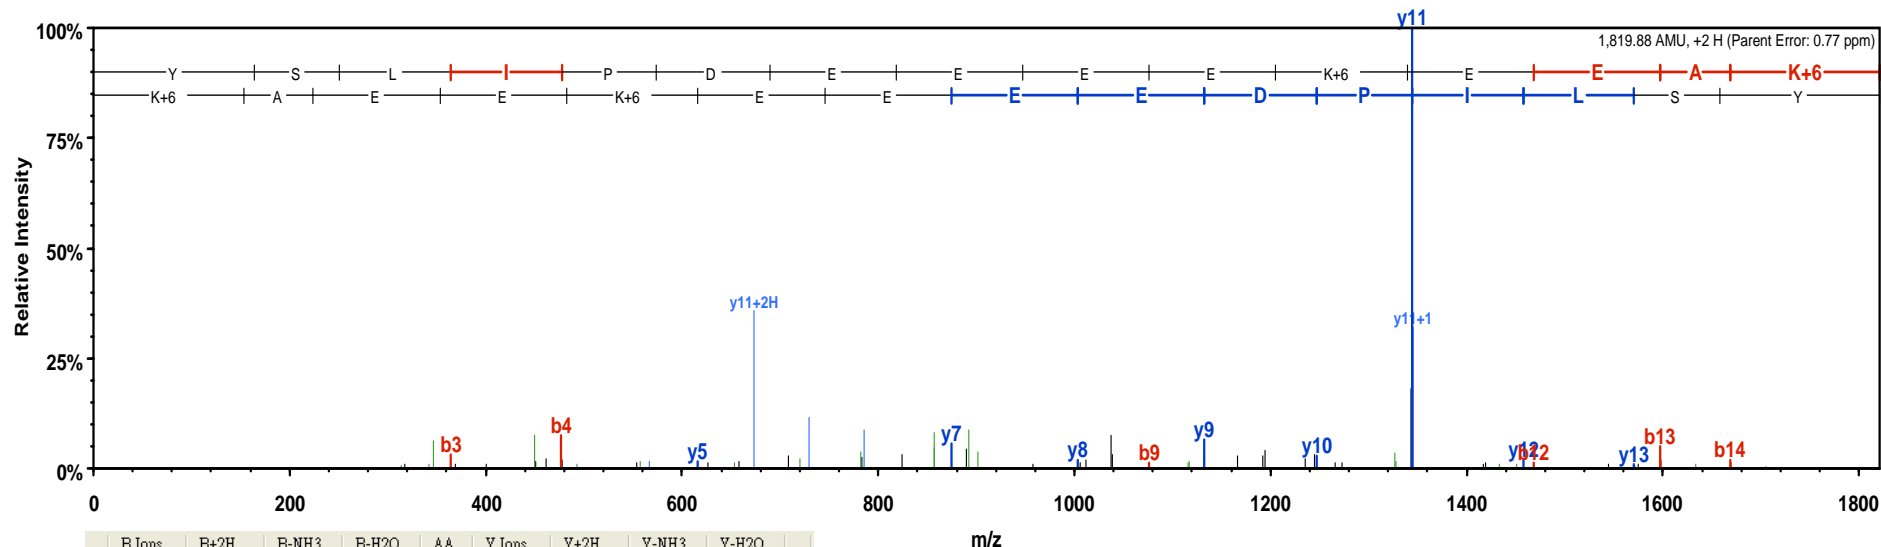

| ... | B Ions  | B+2H  | B-NH3   | B-H2O   | AA  | Y Ions  | Y+2H  | Y-NH3   | Y-H2O   | ... |
|-----|---------|-------|---------|---------|-----|---------|-------|---------|---------|-----|
| 1   | 164.1   |       |         |         | Y   | 1,820.9 | 910.9 | 1,803.9 | 1,802.9 | 15  |
| 2   | 251.1   |       |         | 233.1   | S   | 1,657.8 | 829.4 | 1,640.8 | 1,639.8 | 14  |
| 3   | 364.2   |       |         | 346.2   | L   | 1,570.8 | 785.9 | 1,553.8 | 1,552.8 | 13  |
| 4   | 477.3   |       |         | 459.3   | I   | 1,457.7 | 729.4 | 1,440.7 | 1,439.7 | 12  |
| 5   | 574.3   |       |         | 556.3   | P   | 1,344.6 | 672.8 | 1,327.6 | 1,326.6 | 11  |
| 6   | 689.4   | 345.2 |         | 671.3   | D   | 1,247.6 | 624.3 | 1,230.5 | 1,229.6 | 10  |
| 7   | 818.4   | 409.7 |         | 800.4   | E   | 1,132.5 | 566.8 | 1,115.5 | 1,114.5 | 9   |
| 8   | 947.4   | 474.2 |         | 929.4   | E   | 1,003.5 | 502.3 | 986.5   | 985.5   | 8   |
| 9   | 1,076.5 | 538.7 |         | 1,058.5 | E   | 874.5   | 437.7 | 857.4   | 856.4   | 7   |
| 10  | 1,205.5 | 603.3 |         | 1,187.5 | E   | 745.4   | 373.2 | 728.4   | 727.4   | 6   |
| 11  | 1,339.6 | 670.3 | 1,322.6 | 1,321.6 | K+6 | 616.4   | 308.7 | 599.3   | 598.4   | 5   |
| 12  | 1,468.7 | 734.8 | 1,451.7 | 1,450.7 | E   | 482.3   |       | 465.2   | 464.2   | 4   |
| 13  | 1,597.7 | 799.4 | 1,580.7 | 1,579.7 | E   | 353.2   |       | 336.2   | 335.2   | 3   |
| 14  | 1,668.8 | 834.9 | 1,651.7 | 1,650.7 | A   | 224.2   |       | 207.1   |         | 2   |
| 15  | 1,820.9 | 910.9 | 1,803.9 | 1,802.9 | K+6 | 153.1   |       | 136.1   |         | 1   |

# Whole proteome

| Protein No. | Leading protein name  | Sequence       | Mascot Score | Variable Modifications | SILAC State | Charge | m/z       |
|-------------|-----------------------|----------------|--------------|------------------------|-------------|--------|-----------|
| W-108       | sp O15525 IMAFG_HUMAN | GPLAAGLGPLVPGK | 41.63        | Unmodified             | Heavy       | 2      | 623.87953 |

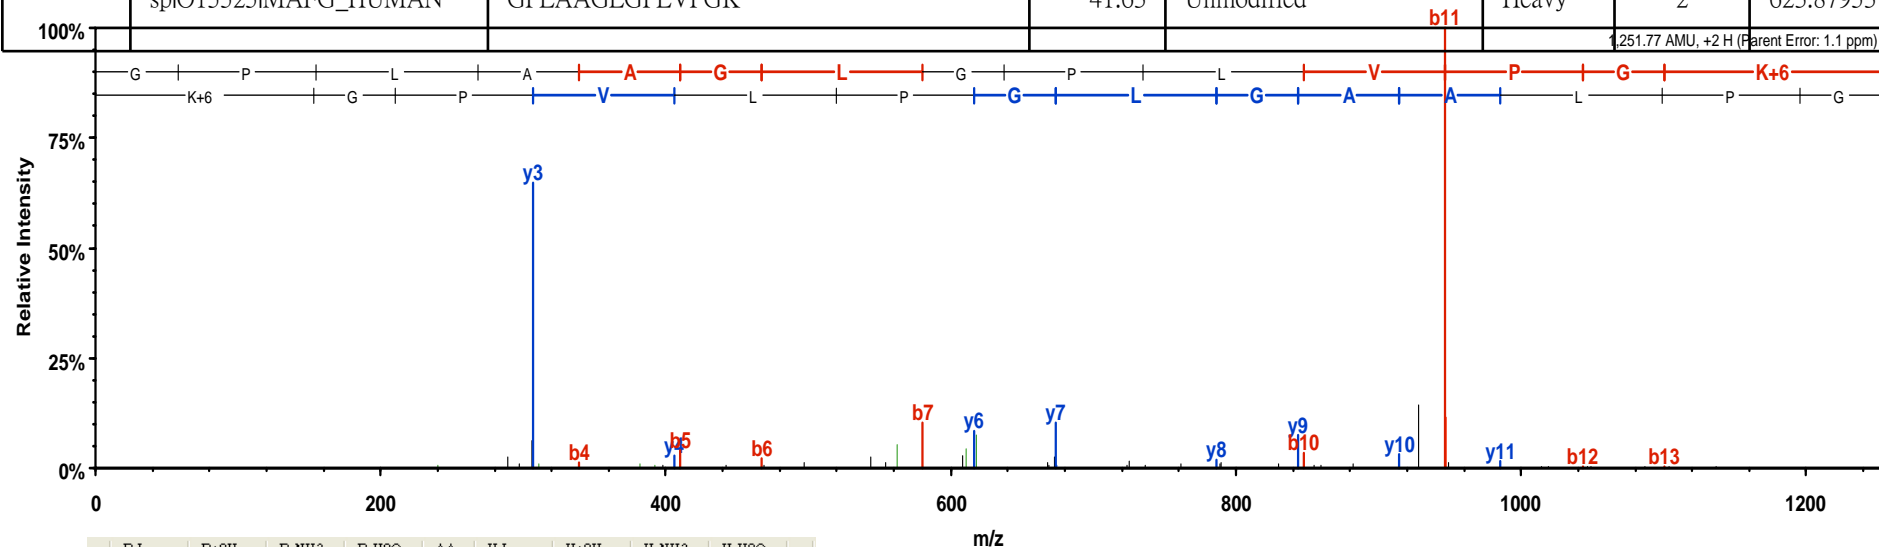

| ... | B Ions  | B+2H  | B-NH3   | B-H2O | AA  | Y Ions  | Y+2H  | Y-NH3   | Y-H2O | ... |
|-----|---------|-------|---------|-------|-----|---------|-------|---------|-------|-----|
| 1   | 58.0    |       |         |       | G   | 1,252.8 | 626.9 | 1,235.7 |       | 14  |
| 2   | 155.1   |       |         |       | P   | 1,195.8 | 598.4 | 1,178.7 |       | 13  |
| 3   | 268.2   |       |         |       | L   | 1,098.7 | 549.9 | 1,081.7 |       | 12  |
| 4   | 339.2   |       |         |       | A   | 985.6   | 493.3 | 968.6   |       | 11  |
| 5   | 410.2   |       |         |       | A   | 914.6   | 457.8 | 897.6   |       | 10  |
| 6   | 467.3   | 234.1 |         |       | G   | 843.5   | 422.3 | 826.5   |       | 9   |
| 7   | 580.3   | 290.7 |         |       | L   | 786.5   | 393.8 | 769.5   |       | 8   |
| 8   | 637.4   | 319.2 |         |       | G   | 673.4   | 337.2 | 656.4   |       | 7   |
| 9   | 734.4   | 367.7 |         |       | P   | 616.4   | 308.7 | 599.4   |       | 6   |
| 10  | 847.5   | 424.3 |         |       | L   | 519.4   |       | 502.3   |       | 5   |
| 11  | 946.6   | 473.8 |         |       | V   | 406.3   |       | 389.2   |       | 4   |
| 12  | 1,043.6 | 522.3 |         |       | P   | 307.2   |       | 290.2   |       | 3   |
| 13  | 1,100.6 | 550.8 |         |       | G   | 210.2   |       | 193.1   |       | 2   |
| 14  | 1,252.8 | 626.9 | 1,235.7 |       | K+6 | 153.1   |       | 136.1   |       | 1   |

# Whole proteome

| Protein No. | Leading protein name  | Sequence                   | Mascot Score | Variable Modifications | SILAC State | Charge | m/z       |
|-------------|-----------------------|----------------------------|--------------|------------------------|-------------|--------|-----------|
| W-109       | splA0PJW6IYK008_HUMAN | AGGQQVTLTTHAPFLGLGAHFTVPLK | 40.5         | Unmodified             | Heavy       | 3      | 850.12721 |

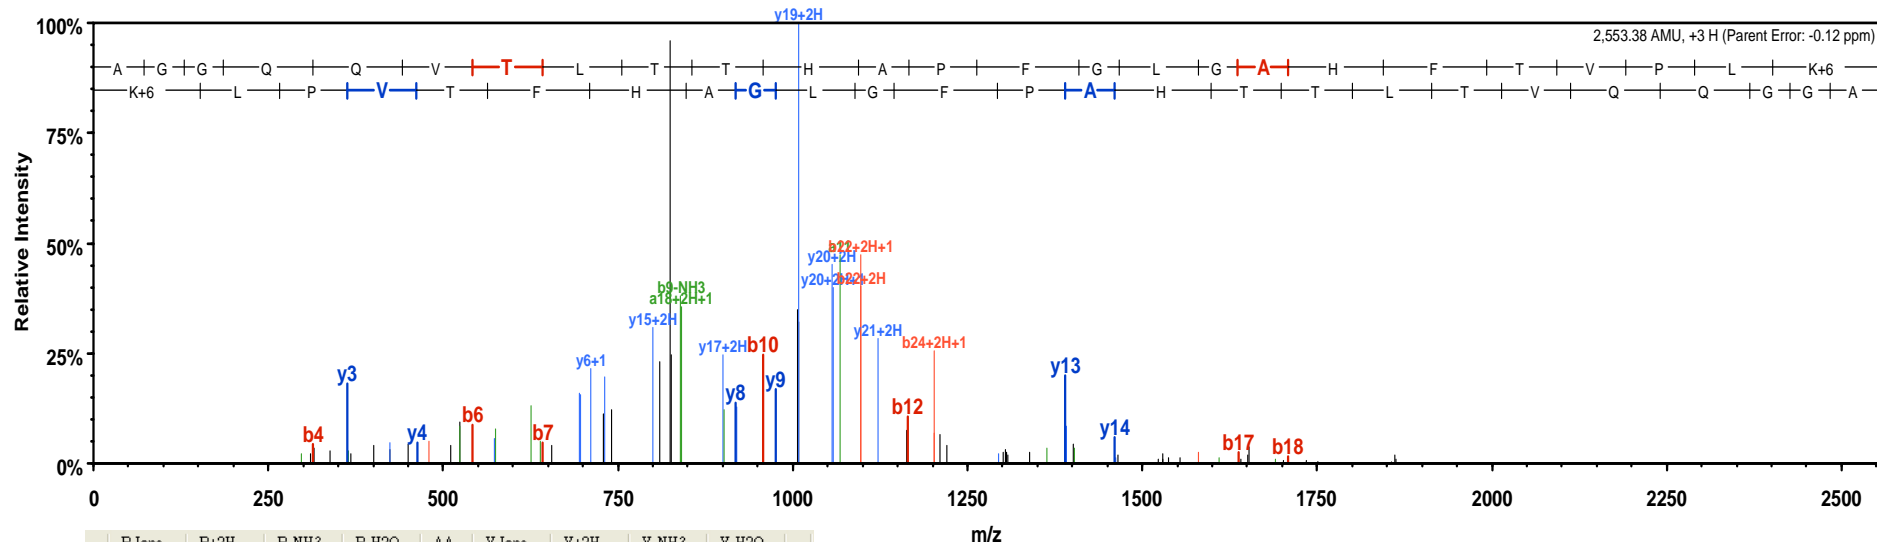

| ... | E Ions  | B+2H    | B-NH3   | B-H2O   | AA  | Y Ions  | Y+2H    | Y-NH3   | Y-H2O   | ... |
|-----|---------|---------|---------|---------|-----|---------|---------|---------|---------|-----|
| 1   | 72.0    |         |         |         | A   | 2,554.4 | 1,277.7 | 2,537.4 | 2,536.4 | 25  |
| 2   | 129.1   |         |         |         | G   | 2,483.4 | 1,242.2 | 2,466.3 | 2,465.3 | 24  |
| 3   | 186.1   |         |         |         | G   | 2,426.3 | 1,213.7 | 2,409.3 | 2,408.3 | 23  |
| 4   | 314.1   |         | 297.1   |         | Q   | 2,369.3 | 1,185.2 | 2,352.3 | 2,351.3 | 22  |
| 5   | 442.2   |         | 425.2   |         | Q   | 2,241.2 | 1,121.1 | 2,224.2 | 2,223.2 | 21  |
| 6   | 541.3   | 271.1   | 524.2   |         | V   | 2,113.2 | 1,057.1 | 2,096.2 | 2,095.2 | 20  |
| 7   | 642.3   | 321.7   | 625.3   | 624.3   | T   | 2,014.1 | 1,007.6 | 1,997.1 | 1,996.1 | 19  |
| 8   | 755.4   | 378.2   | 738.4   | 737.4   | L   | 1,913.1 | 957.0   | 1,896.0 | 1,895.1 | 18  |
| 9   | 856.5   | 428.7   | 839.4   | 838.4   | T   | 1,800.0 | 900.5   | 1,783.0 | 1,782.0 | 17  |
| 10  | 957.5   | 479.3   | 940.5   | 939.5   | T   | 1,698.9 | 850.0   | 1,681.9 | 1,680.9 | 16  |
| 11  | 1,094.6 | 547.8   | 1,077.5 | 1,076.5 | H   | 1,597.9 | 799.5   | 1,580.9 | 1,579.9 | 15  |
| 12  | 1,165.6 | 583.3   | 1,148.6 | 1,147.6 | A   | 1,460.8 | 730.9   | 1,443.8 | 1,442.8 | 14  |
| 13  | 1,262.6 | 631.8   | 1,245.6 | 1,244.6 | P   | 1,389.8 | 695.4   | 1,372.8 | 1,371.8 | 13  |
| 14  | 1,409.7 | 705.4   | 1,392.7 | 1,391.7 | F   | 1,292.7 | 646.9   | 1,275.7 | 1,274.7 | 12  |
| 15  | 1,466.7 | 733.9   | 1,449.7 | 1,448.7 | G   | 1,145.7 | 573.3   | 1,128.7 | 1,127.7 | 11  |
| 16  | 1,579.8 | 790.4   | 1,562.8 | 1,561.8 | L   | 1,088.7 | 544.8   | 1,071.6 | 1,070.6 | 10  |
| 17  | 1,636.8 | 818.9   | 1,619.8 | 1,618.8 | G   | 975.6   | 488.3   | 958.5   | 957.6   | 9   |
| 18  | 1,707.9 | 854.4   | 1,690.9 | 1,689.9 | A   | 918.6   | 459.8   | 901.5   | 900.5   | 8   |
| 19  | 1,844.9 | 923.0   | 1,827.9 | 1,826.9 | H   | 847.5   | 424.3   | 830.5   | 829.5   | 7   |
| 20  | 1,992.0 | 996.5   | 1,975.0 | 1,974.0 | F   | 710.5   | 355.7   | 693.4   | 692.4   | 6   |
| 21  | 2,093.1 | 1,047.0 | 2,076.0 | 2,075.0 | T   | 563.4   |         | 546.4   | 545.4   | 5   |
| 22  | 2,192.1 | 1,096.6 | 2,175.1 | 2,174.1 | V   | 462.3   |         | 445.3   |         | 4   |
| 23  | 2,289.2 | 1,145.1 | 2,272.2 | 2,271.2 | P   | 363.3   |         | 346.2   |         | 3   |
| 24  | 2,402.3 | 1,201.6 | 2,385.2 | 2,384.3 | L   | 266.2   |         | 249.2   |         | 2   |
| 25  | 2,554.4 | 1,277.7 | 2,537.4 | 2,536.4 | K+6 | 153.1   |         | 136.1   |         | 1   |

# Whole proteome

| Protein No. | Leading protein name  | Sequence     | Mascot Score | Variable Modifications | SILAC State | Charge | m/z       |
|-------------|-----------------------|--------------|--------------|------------------------|-------------|--------|-----------|
| W-110       | splO75419 CC45L_HUMAN | SKFLDALISLLS | 40.41        | Unmodified             | Heavy       | 2      | 653.88448 |

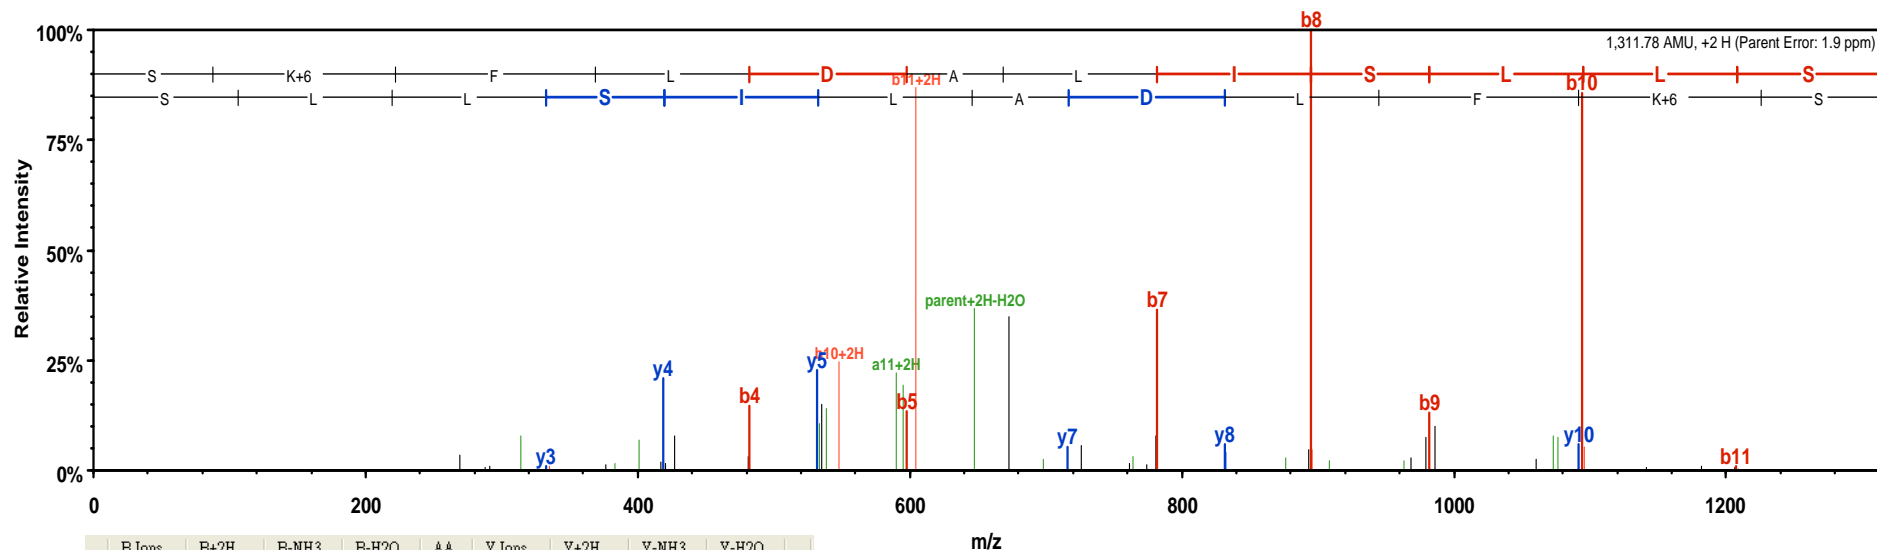

| ... | B Ions  | B+2H  | B-NH3   | B-H2O   | AA  | Y Ions  | Y+2H  | Y-NH3   | Y-H2O   | ... |
|-----|---------|-------|---------|---------|-----|---------|-------|---------|---------|-----|
| 1   | 88.0    |       |         | 70.0    | S   | 1,312.8 | 656.9 | 1,295.8 | 1,294.8 | 12  |
| 2   | 222.2   | 111.6 | 205.1   | 204.1   | K+6 | 1,225.8 | 613.4 | 1,208.7 | 1,207.7 | 11  |
| 3   | 369.2   | 185.1 | 352.2   | 351.2   | F   | 1,091.6 |       |         | 1,073.6 | 10  |
| 4   | 482.3   | 241.7 | 465.3   | 464.3   | L   | 944.6   |       |         | 926.6   | 9   |
| 5   | 597.3   | 299.2 | 580.3   | 579.3   | D   | 831.5   |       |         | 813.5   | 8   |
| 6   | 668.4   | 334.7 | 651.3   | 650.4   | A   | 716.5   |       |         | 698.4   | 7   |
| 7   | 781.5   | 391.2 | 764.4   | 763.4   | L   | 645.4   |       |         | 627.4   | 6   |
| 8   | 894.5   | 447.8 | 877.5   | 876.5   | I   | 532.3   |       |         | 514.3   | 5   |
| 9   | 981.6   | 491.3 | 964.5   | 963.6   | S   | 419.3   |       |         | 401.2   | 4   |
| 10  | 1,094.7 | 547.8 | 1,077.6 | 1,076.6 | L   | 332.2   |       |         | 314.2   | 3   |
| 11  | 1,207.7 | 604.4 | 1,190.7 | 1,189.7 | L   | 219.1   |       |         | 201.1   | 2   |
| 12  | 1,312.8 | 656.9 | 1,295.8 | 1,294.8 | S   | 106.0   |       |         | 88.0    | 1   |

# Whole proteome

| Protein No. | Leading protein name  | Sequence   | Mascot Score | Variable Modifications  | SILAC State | Charge | m/z       |
|-------------|-----------------------|------------|--------------|-------------------------|-------------|--------|-----------|
| W-111       | sp O75449 KTNA1_HUMAN | SLLMISENVK | 39.9         | Acetyl (Protein N-term) | Light       | 2      | 588.32066 |

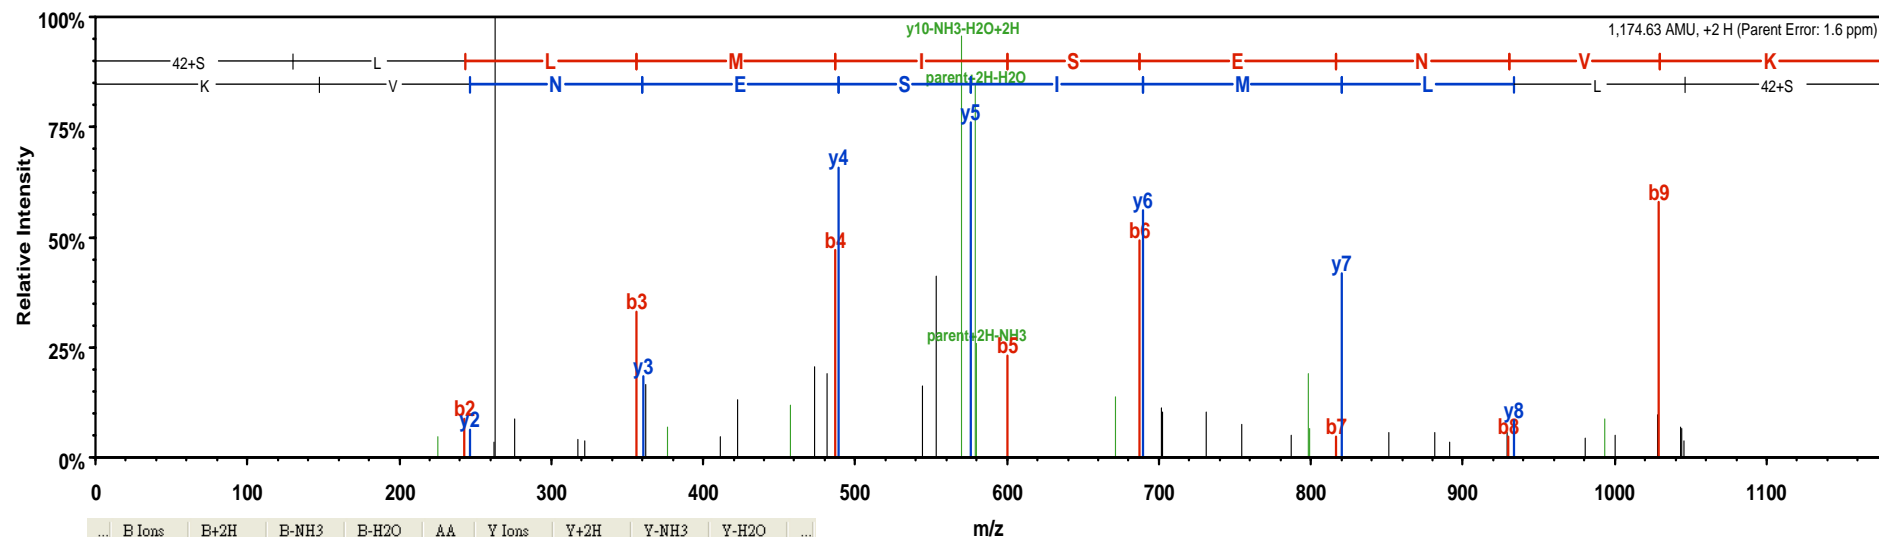

| ... | B Ions  | B+2H  | B-NH3   | B-H2O   | AA   | Y Ions  | Y+2H  | Y-NH3   | Y-H2O   | ... |
|-----|---------|-------|---------|---------|------|---------|-------|---------|---------|-----|
| 1   | 130.0   |       |         | 112.0   | S+42 | 1,175.6 | 588.3 | 1,158.6 | 1,157.6 | 10  |
| 2   | 243.1   |       |         | 225.1   | L    | 1,046.6 | 523.8 | 1,029.6 | 1,028.6 | 9   |
| 3   | 356.2   |       |         | 338.2   | L    | 933.5   | 467.3 | 916.5   | 915.5   | 8   |
| 4   | 487.3   |       |         | 469.2   | M    | 820.4   | 410.7 | 803.4   | 802.4   | 7   |
| 5   | 600.3   |       |         | 582.3   | I    | 689.4   | 345.2 | 672.4   | 671.4   | 6   |
| 6   | 687.4   | 344.2 |         | 669.4   | S    | 576.3   |       | 559.3   | 558.3   | 5   |
| 7   | 816.4   | 408.7 |         | 798.4   | E    | 489.3   |       | 472.2   | 471.3   | 4   |
| 8   | 930.5   | 465.7 | 913.4   | 912.4   | N    | 360.2   |       | 343.2   |         | 3   |
| 9   | 1,029.5 | 515.3 | 1,012.5 | 1,011.5 | V    | 246.2   |       | 229.2   |         | 2   |
| 10  | 1,175.6 | 588.3 | 1,158.6 | 1,157.6 | K    | 147.1   |       | 130.1   |         | 1   |



# Whole proteome

| Protein No. | Leading protein name | Sequence    | Mascot Score | Variable Modifications  | SILAC State | Charge | m/z       |
|-------------|----------------------|-------------|--------------|-------------------------|-------------|--------|-----------|
| W-112       | splP56589 PEX3_HUMAN | MLRSVWNFLKR | 38.22        | Acetyl (Protein N-term) | Heavy       | 3      | 497.94662 |

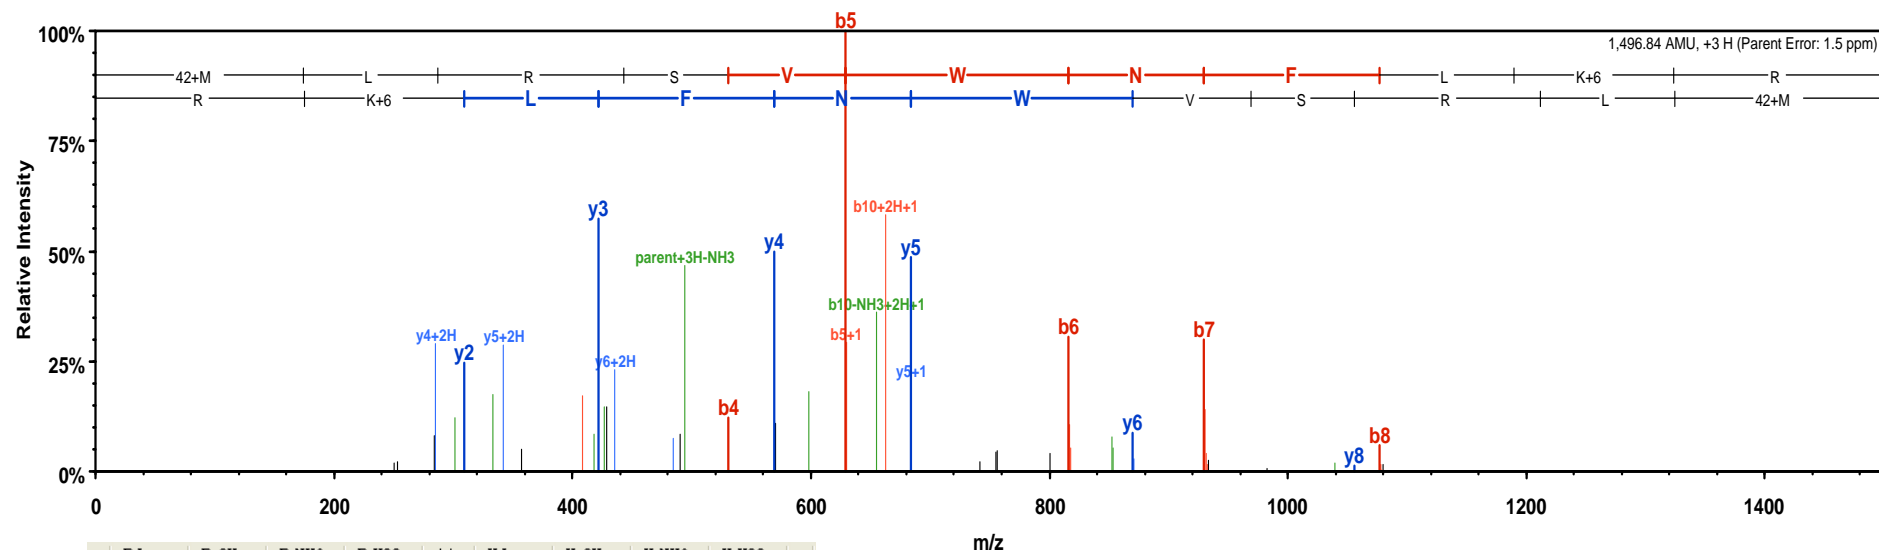

| ... | B Ions  | B+2H  | B-NH3   | B-H2O   | AA   | Y Ions  | Y+2H  | Y-NH3   | Y-H2O   | ... |
|-----|---------|-------|---------|---------|------|---------|-------|---------|---------|-----|
| 1   | 174.1   |       |         |         | M+42 | 1,497.8 | 749.4 | 1,480.8 | 1,479.8 | 11  |
| 2   | 287.1   |       |         |         | L    | 1,324.8 | 662.9 | 1,307.8 | 1,306.8 | 10  |
| 3   | 443.2   | 222.1 | 426.2   |         | R    | 1,211.7 | 606.4 | 1,194.7 | 1,193.7 | 9   |
| 4   | 530.3   | 265.6 | 513.2   | 512.3   | S    | 1,055.6 | 528.3 | 1,038.6 | 1,037.6 | 8   |
| 5   | 629.3   | 315.2 | 612.3   | 611.3   | V    | 968.6   | 484.8 | 951.6   |         | 7   |
| 6   | 815.4   | 408.2 | 798.4   | 797.4   | W    | 869.5   | 435.3 | 852.5   |         | 6   |
| 7   | 929.5   | 465.2 | 912.4   | 911.5   | N    | 683.4   | 342.2 | 666.4   |         | 5   |
| 8   | 1,076.5 | 538.8 | 1,059.5 | 1,058.5 | F    | 569.4   | 285.2 | 552.4   |         | 4   |
| 9   | 1,189.6 | 595.3 | 1,172.6 | 1,171.6 | L    | 422.3   | 211.7 | 405.3   |         | 3   |
| 10  | 1,323.7 | 662.4 | 1,306.7 | 1,305.7 | K+6  | 309.2   | 155.1 | 292.2   |         | 2   |
| 11  | 1,497.8 | 749.4 | 1,480.8 | 1,479.8 | R    | 175.1   |       | 158.1   |         | 1   |

# Whole proteome

| Protein No. | Leading protein name  | Sequence         | Mascot Score | Variable Modifications | SILAC State | Charge | m/z       |
|-------------|-----------------------|------------------|--------------|------------------------|-------------|--------|-----------|
| W-113       | splQ96A29IFUCT1_HUMAN | SLTTVFNVLLSYLLLK | 37.89        | Unmodified             | Light       | 2      | 912.54769 |

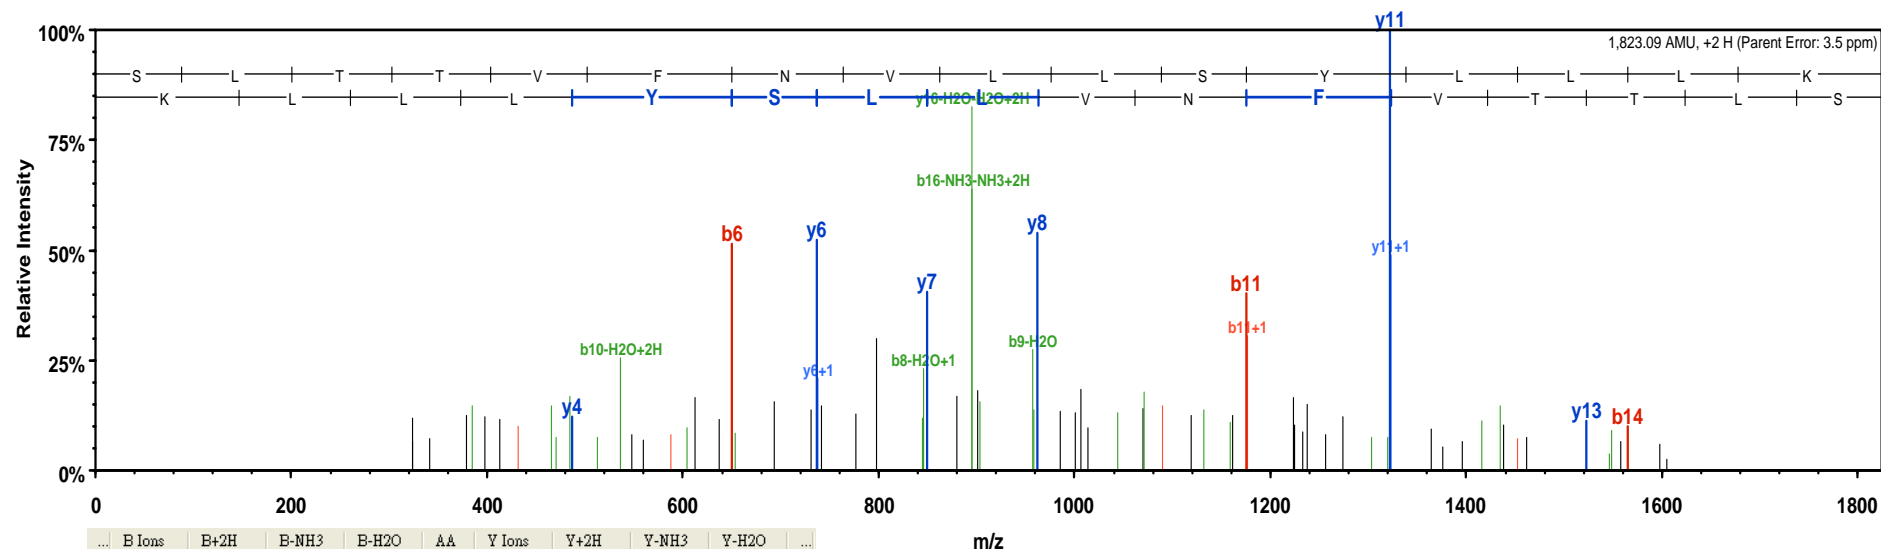

| ... | B Ions  | B+2H  | B-NH3   | B-H2O   | AA | Y Ions  | Y+2H  | Y-NH3   | Y-H2O   | ... |
|-----|---------|-------|---------|---------|----|---------|-------|---------|---------|-----|
| 1   | 88.0    |       |         | 70.0    | S  | 1,824.1 | 912.5 | 1,807.1 | 1,806.1 | 16  |
| 2   | 201.1   |       |         | 183.1   | L  | 1,737.1 | 869.0 | 1,720.0 | 1,719.0 | 15  |
| 3   | 302.2   |       |         | 284.2   | T  | 1,624.0 | 812.5 | 1,606.9 | 1,606.0 | 14  |
| 4   | 403.2   |       |         | 385.2   | T  | 1,522.9 | 762.0 | 1,505.9 | 1,504.9 | 13  |
| 5   | 502.3   |       |         | 484.3   | V  | 1,421.9 | 711.4 | 1,404.9 | 1,403.9 | 12  |
| 6   | 649.4   | 325.2 |         | 631.3   | F  | 1,322.8 | 661.9 | 1,305.8 | 1,304.8 | 11  |
| 7   | 763.4   | 382.2 | 746.4   | 745.4   | N  | 1,175.7 | 588.4 | 1,158.7 | 1,157.7 | 10  |
| 8   | 862.5   | 431.7 | 845.4   | 844.5   | V  | 1,061.7 | 531.4 | 1,044.7 | 1,043.7 | 9   |
| 9   | 975.6   | 488.3 | 958.5   | 957.5   | L  | 962.6   | 481.8 | 945.6   | 944.6   | 8   |
| 10  | 1,088.6 | 544.8 | 1,071.6 | 1,070.6 | L  | 849.5   | 425.3 | 832.5   | 831.5   | 7   |
| 11  | 1,175.7 | 588.3 | 1,158.6 | 1,157.7 | S  | 736.5   | 368.7 | 719.4   | 718.4   | 6   |
| 12  | 1,338.7 | 669.9 | 1,321.7 | 1,320.7 | V  | 649.4   |       | 632.4   |         | 5   |
| 13  | 1,451.8 | 726.4 | 1,434.8 | 1,433.8 | L  | 486.4   |       | 469.3   |         | 4   |
| 14  | 1,564.9 | 783.0 | 1,547.9 | 1,546.9 | L  | 373.3   |       | 356.3   |         | 3   |
| 15  | 1,678.0 | 839.5 | 1,661.0 | 1,660.0 | L  | 260.2   |       | 243.2   |         | 2   |
| 16  | 1,824.1 | 912.5 | 1,807.1 | 1,806.1 | K  | 147.1   |       | 130.1   |         | 1   |

# Whole proteome

| Protein No. | Leading protein name  | Sequence                   | Mascot Score | Variable Modifications | SILAC State | Charge | m/z       |
|-------------|-----------------------|----------------------------|--------------|------------------------|-------------|--------|-----------|
| W-114       | sp Q9BRA0 LSMD1_HUMAN | DCNVILGSAQEFLKPSDFSFSAGEPR | 36.86        | Unmodified             | Light       | 2      | 1362.6503 |

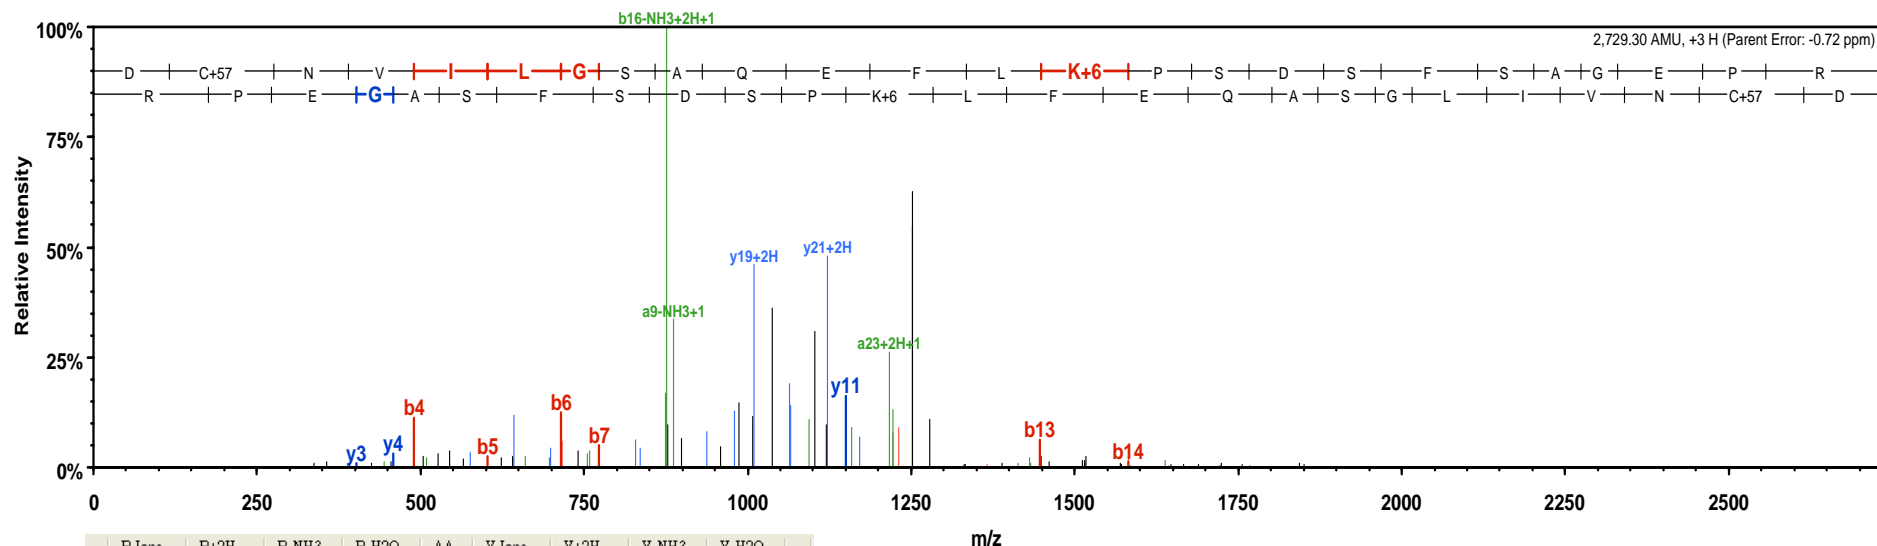

| ... | E Ions  | B+2H    | B-NH3   | B-H2O   | AA   | Y Ions  | Y+2H    | Y-NH3   | Y-H2O   | ... |
|-----|---------|---------|---------|---------|------|---------|---------|---------|---------|-----|
| 1   | 116.0   |         |         | 98.0    | D    | 2,730.3 | 1,365.7 | 2,713.3 | 2,712.3 | 25  |
| 2   | 276.1   |         |         | 258.1   | C+57 | 2,615.3 | 1,308.1 | 2,598.3 | 2,597.3 | 24  |
| 3   | 390.1   |         | 373.1   | 372.1   | N    | 2,455.3 | 1,228.1 | 2,438.2 | 2,437.2 | 23  |
| 4   | 489.2   |         | 472.1   | 471.2   | V    | 2,341.2 | 1,171.1 | 2,324.2 | 2,323.2 | 22  |
| 5   | 602.3   |         | 585.2   | 584.2   | I    | 2,242.1 | 1,121.6 | 2,225.1 | 2,224.1 | 21  |
| 6   | 715.3   | 358.2   | 698.3   | 697.3   | L    | 2,129.1 | 1,065.0 | 2,112.0 | 2,111.1 | 20  |
| 7   | 772.4   | 386.7   | 755.3   | 754.4   | G    | 2,016.0 | 1,008.5 | 1,998.9 | 1,998.0 | 19  |
| 8   | 859.4   | 430.2   | 842.4   | 841.4   | S    | 1,959.0 | 980.0   | 1,941.9 | 1,940.9 | 18  |
| 9   | 930.4   | 465.7   | 913.4   | 912.4   | A    | 1,871.9 | 936.5   | 1,854.9 | 1,853.9 | 17  |
| 10  | 1,058.5 | 529.8   | 1,041.5 | 1,040.5 | Q    | 1,800.9 | 900.9   | 1,783.9 | 1,782.9 | 16  |
| 11  | 1,187.5 | 594.3   | 1,170.5 | 1,169.5 | E    | 1,672.8 | 836.9   | 1,655.8 | 1,654.8 | 15  |
| 12  | 1,334.6 | 667.8   | 1,317.6 | 1,316.6 | F    | 1,543.8 | 772.4   | 1,526.8 | 1,525.8 | 14  |
| 13  | 1,447.7 | 724.3   | 1,430.7 | 1,429.7 | L    | 1,396.7 | 698.9   | 1,379.7 | 1,378.7 | 13  |
| 14  | 1,581.8 | 791.4   | 1,564.8 | 1,563.8 | K+6  | 1,283.6 | 642.3   | 1,266.6 | 1,265.6 | 12  |
| 15  | 1,678.9 | 839.9   | 1,661.8 | 1,660.8 | P    | 1,149.5 | 575.3   | 1,132.5 | 1,131.5 | 11  |
| 16  | 1,765.9 | 883.4   | 1,748.9 | 1,747.9 | S    | 1,052.5 | 526.7   | 1,035.4 | 1,034.5 | 10  |
| 17  | 1,880.9 | 941.0   | 1,863.9 | 1,862.9 | D    | 965.4   | 483.2   | 948.4   | 947.4   | 9   |
| 18  | 1,967.9 | 984.5   | 1,950.9 | 1,949.9 | S    | 850.4   | 425.7   | 833.4   | 832.4   | 8   |
| 19  | 2,115.0 | 1,058.0 | 2,098.0 | 2,097.0 | F    | 763.4   | 382.2   | 746.3   | 745.4   | 7   |
| 20  | 2,202.0 | 1,101.5 | 2,185.0 | 2,184.0 | S    | 616.3   | 308.7   | 599.3   | 598.3   | 6   |
| 21  | 2,273.1 | 1,137.0 | 2,256.1 | 2,255.1 | A    | 529.3   |         | 512.2   | 511.3   | 5   |
| 22  | 2,330.1 | 1,165.6 | 2,313.1 | 2,312.1 | G    | 458.2   |         | 441.2   | 440.2   | 4   |
| 23  | 2,459.1 | 1,230.1 | 2,441.1 | 2,441.1 | E    | 401.2   |         | 384.2   | 383.2   | 3   |
| 24  | 2,556.2 | 1,278.6 | 2,539.2 | 2,538.2 | P    | 272.2   |         | 255.1   |         | 2   |
| 25  | 2,730.3 | 1,365.7 | 2,713.3 | 2,712.3 | R    | 175.1   |         | 158.1   |         | 1   |

# Whole proteome

| Protein No. | Leading protein name | Sequence       | Mascot Score | Variable Modifications | SILAC State | Charge | m/z       |
|-------------|----------------------|----------------|--------------|------------------------|-------------|--------|-----------|
| W-115       | splQ9H0N5IPHS2_HUMAN | MNHHPEWFWNVYNK | 36.77        | Unmodified             | Light       | 3      | 572.59642 |

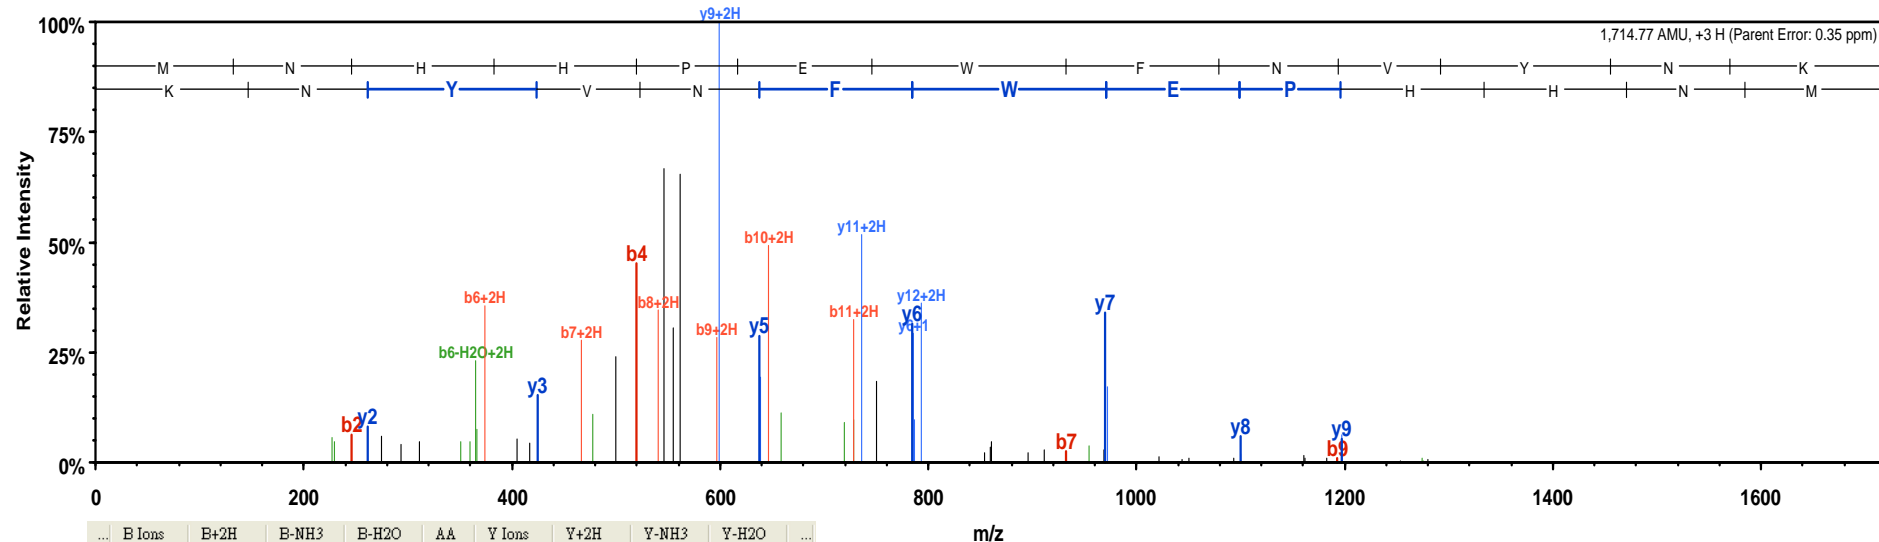

| ... | B Ions  | B+2H  | B-NH3   | B-H2O   | AA | Y Ions  | Y+2H  | Y-NH3   | Y-H2O   | ... |
|-----|---------|-------|---------|---------|----|---------|-------|---------|---------|-----|
| 1   | 132.0   |       |         |         | M  | 1,715.8 | 858.4 | 1,698.7 | 1,697.8 | 13  |
| 2   | 246.1   |       | 229.1   |         | N  | 1,584.7 | 792.9 | 1,567.7 | 1,566.7 | 12  |
| 3   | 383.1   | 192.1 | 366.1   |         | H  | 1,470.7 | 735.8 | 1,453.7 | 1,452.7 | 11  |
| 4   | 520.2   | 260.6 | 503.2   |         | H  | 1,333.6 | 667.3 | 1,316.6 | 1,315.6 | 10  |
| 5   | 617.3   | 309.1 | 600.2   |         | P  | 1,196.6 | 598.8 | 1,179.5 | 1,178.6 | 9   |
| 6   | 746.3   | 373.7 | 729.3   | 728.3   | E  | 1,099.5 | 550.3 | 1,082.5 | 1,081.5 | 8   |
| 7   | 932.4   | 466.7 | 915.4   | 914.4   | W  | 970.5   | 485.7 | 953.5   |         | 7   |
| 8   | 1,079.5 | 540.2 | 1,062.4 | 1,061.4 | F  | 784.4   | 392.7 | 767.4   |         | 6   |
| 9   | 1,193.5 | 597.3 | 1,176.5 | 1,175.5 | N  | 637.3   |       | 620.3   |         | 5   |
| 10  | 1,292.6 | 646.8 | 1,275.5 | 1,274.6 | V  | 523.3   |       | 506.3   |         | 4   |
| 11  | 1,455.6 | 728.3 | 1,438.6 | 1,437.6 | Y  | 424.2   |       | 407.2   |         | 3   |
| 12  | 1,569.7 | 785.3 | 1,552.6 | 1,551.7 | N  | 261.2   |       | 244.1   |         | 2   |
| 13  | 1,715.8 | 858.4 | 1,698.7 | 1,697.8 | K  | 147.1   |       | 130.1   |         | 1   |

# Whole proteome

| Protein No. | Leading protein name | Sequence | Mascot Score | Variable Modifications | SILAC State | Charge | m/z       |
|-------------|----------------------|----------|--------------|------------------------|-------------|--------|-----------|
| W-116       | splQ9H8P0IS5A3_HUMAN | KAFLPFLF | 36.25        | Unmodified             | Light       | 2      | 491.79166 |

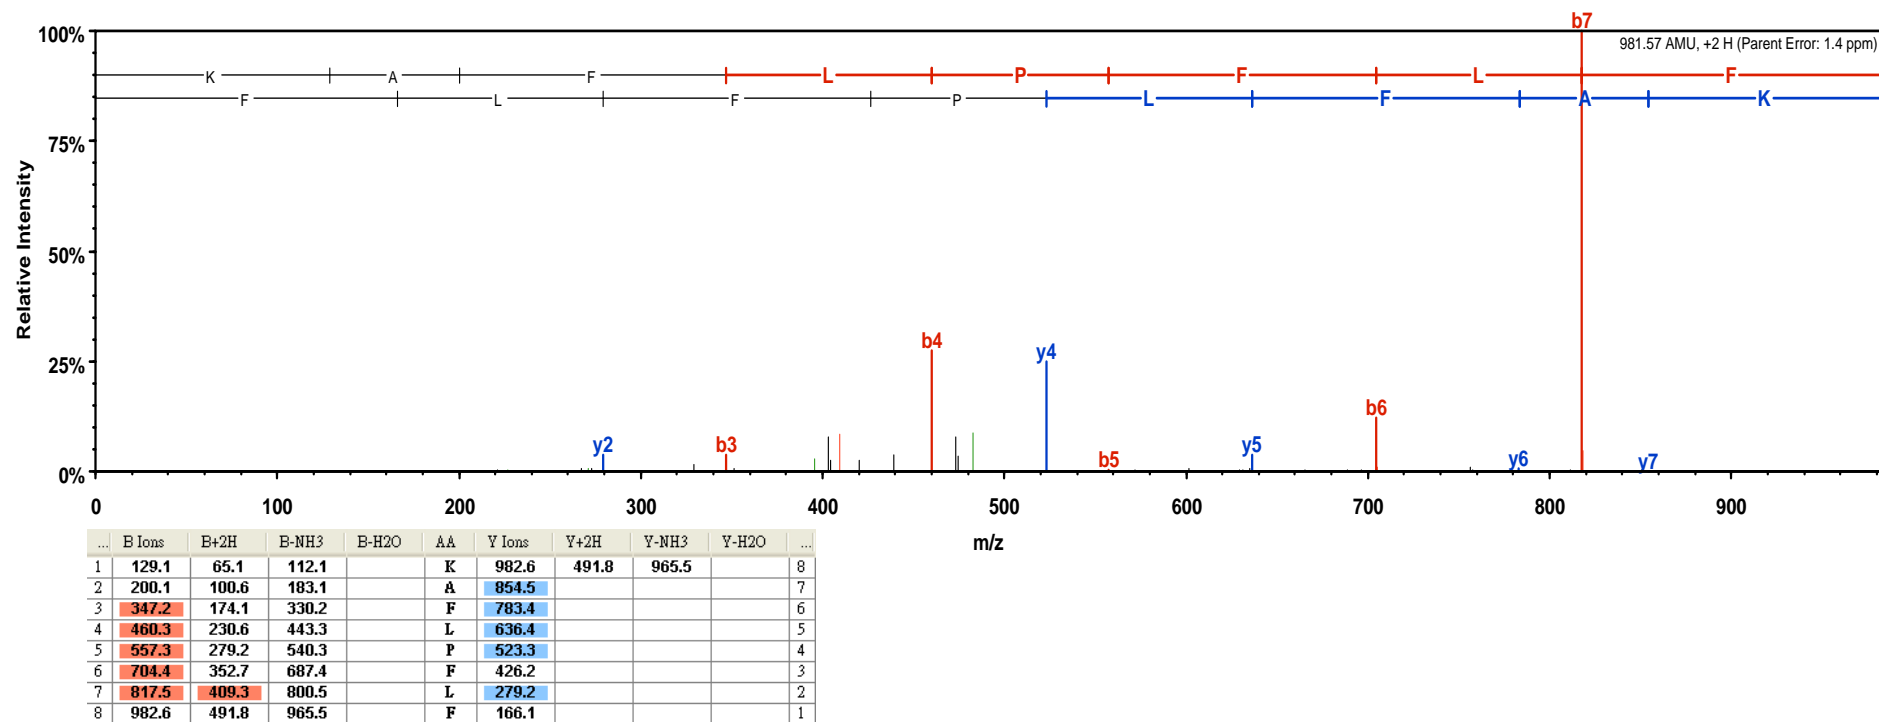

# Whole proteome

| Protein No. | Leading protein name  | Sequence                     | Mascot Score | Variable Modifications | SILAC State | Charge | m/z      |
|-------------|-----------------------|------------------------------|--------------|------------------------|-------------|--------|----------|
| W-117       | splP50238 CRIP1_HUMAN | TLTSGGHAEHEGKPYCNHPCYAAMFGPK | 36.08        | Unmodified             | Light       | 3      | 1039.797 |

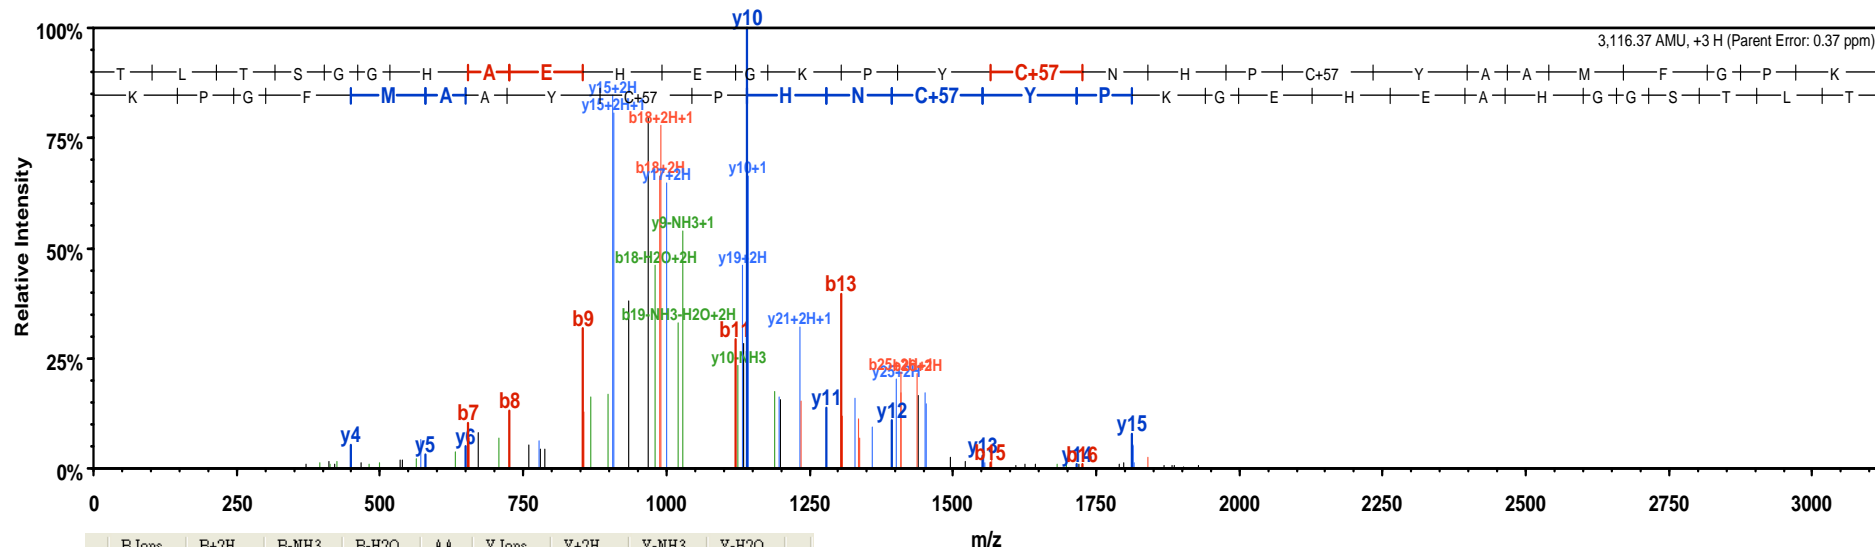

| ... | B Ions  | B+2H    | B-NH3   | B-H2O   | AA   | Y Ions  | Y+2H    | Y-NH3   | Y-H2O   | ... |
|-----|---------|---------|---------|---------|------|---------|---------|---------|---------|-----|
| 1   | 102.1   |         |         | 84.0    | T    | 3,117.4 | 1,559.2 | 3,100.3 | 3,099.4 | 28  |
| 2   | 215.1   |         |         | 197.1   | L    | 3,016.3 | 1,508.7 | 2,999.3 | 2,998.3 | 27  |
| 3   | 316.2   |         |         | 298.2   | T    | 2,903.2 | 1,452.1 | 2,886.2 | 2,885.2 | 26  |
| 4   | 403.2   |         |         | 385.2   | S    | 2,802.2 | 1,401.6 | 2,785.2 | 2,784.2 | 25  |
| 5   | 460.2   |         |         | 442.2   | G    | 2,715.2 | 1,358.1 | 2,698.1 | 2,697.2 | 24  |
| 6   | 517.3   | 259.1   |         | 499.3   | G    | 2,658.1 | 1,329.6 | 2,641.1 | 2,640.1 | 23  |
| 7   | 654.3   | 327.7   |         | 636.3   | H    | 2,601.1 | 1,301.1 | 2,584.1 | 2,583.1 | 22  |
| 8   | 725.4   | 363.2   |         | 707.3   | A    | 2,464.1 | 1,232.5 | 2,447.0 | 2,446.1 | 21  |
| 9   | 854.4   | 427.7   |         | 836.4   | E    | 2,393.0 | 1,197.0 | 2,376.0 | 2,375.0 | 20  |
| 10  | 991.5   | 496.2   |         | 973.4   | H    | 2,264.0 | 1,132.5 | 2,247.0 | 2,246.0 | 19  |
| 11  | 1,120.5 | 560.8   |         | 1,102.5 | E    | 2,126.9 | 1,064.0 | 2,109.9 | 2,108.9 | 18  |
| 12  | 1,177.5 | 589.3   |         | 1,159.5 | G    | 1,997.9 | 999.4   | 1,980.9 |         | 17  |
| 13  | 1,305.6 | 653.3   | 1,288.6 | 1,287.6 | K    | 1,940.9 | 970.9   | 1,923.8 |         | 16  |
| 14  | 1,402.7 | 701.8   | 1,385.6 | 1,384.7 | P    | 1,812.8 | 906.9   | 1,795.7 |         | 15  |
| 15  | 1,565.7 | 783.4   | 1,548.7 | 1,547.7 | Y    | 1,715.7 | 858.4   | 1,698.7 |         | 14  |
| 16  | 1,725.8 | 863.4   | 1,708.7 | 1,707.8 | C+57 | 1,552.6 | 776.8   | 1,535.6 |         | 13  |
| 17  | 1,839.8 | 920.4   | 1,822.8 | 1,821.8 | N    | 1,392.6 | 696.8   | 1,375.6 |         | 12  |
| 18  | 1,976.9 | 988.9   | 1,959.8 | 1,958.9 | H    | 1,278.6 | 639.8   | 1,261.5 |         | 11  |
| 19  | 2,073.9 | 1,037.5 | 2,056.9 | 2,055.9 | P    | 1,141.5 | 571.3   | 1,124.5 |         | 10  |
| 20  | 2,234.0 | 1,117.5 | 2,216.9 | 2,215.9 | C+57 | 1,044.5 | 522.7   | 1,027.4 |         | 9   |
| 21  | 2,397.0 | 1,199.0 | 2,380.0 | 2,379.0 | Y    | 884.4   | 442.7   | 867.4   |         | 8   |
| 22  | 2,468.1 | 1,234.5 | 2,451.0 | 2,450.0 | A    | 721.4   | 361.2   | 704.3   |         | 7   |
| 23  | 2,539.1 | 1,270.0 | 2,522.1 | 2,521.1 | A    | 650.3   | 325.7   | 633.3   |         | 6   |
| 24  | 2,670.1 | 1,335.6 | 2,653.1 | 2,652.1 | M    | 579.3   |         | 562.3   |         | 5   |
| 25  | 2,817.2 | 1,409.1 | 2,800.2 | 2,799.2 | F    | 448.3   |         | 431.2   |         | 4   |
| 26  | 2,874.2 | 1,437.6 | 2,857.2 | 2,856.2 | G    | 301.2   |         | 284.2   |         | 3   |
| 27  | 2,971.3 | 1,486.1 | 2,954.2 | 2,953.3 | P    | 244.2   |         | 227.1   |         | 2   |
| 28  | 3,117.4 | 1,559.2 | 3,100.3 | 3,099.4 | K    | 147.1   |         | 130.1   |         | 1   |

# Whole proteome

| Protein No. | Leading protein name  | Sequence               | Mascot Score | Variable Modifications | SILAC State | Charge | m/z       |
|-------------|-----------------------|------------------------|--------------|------------------------|-------------|--------|-----------|
| W-118       | splQ9H8T0IAKTIP_HUMAN | LVFDIPVFHPLVDPTSGELDVK | 35.85        | Unmodified             | Light       | 2      | 1219.1543 |

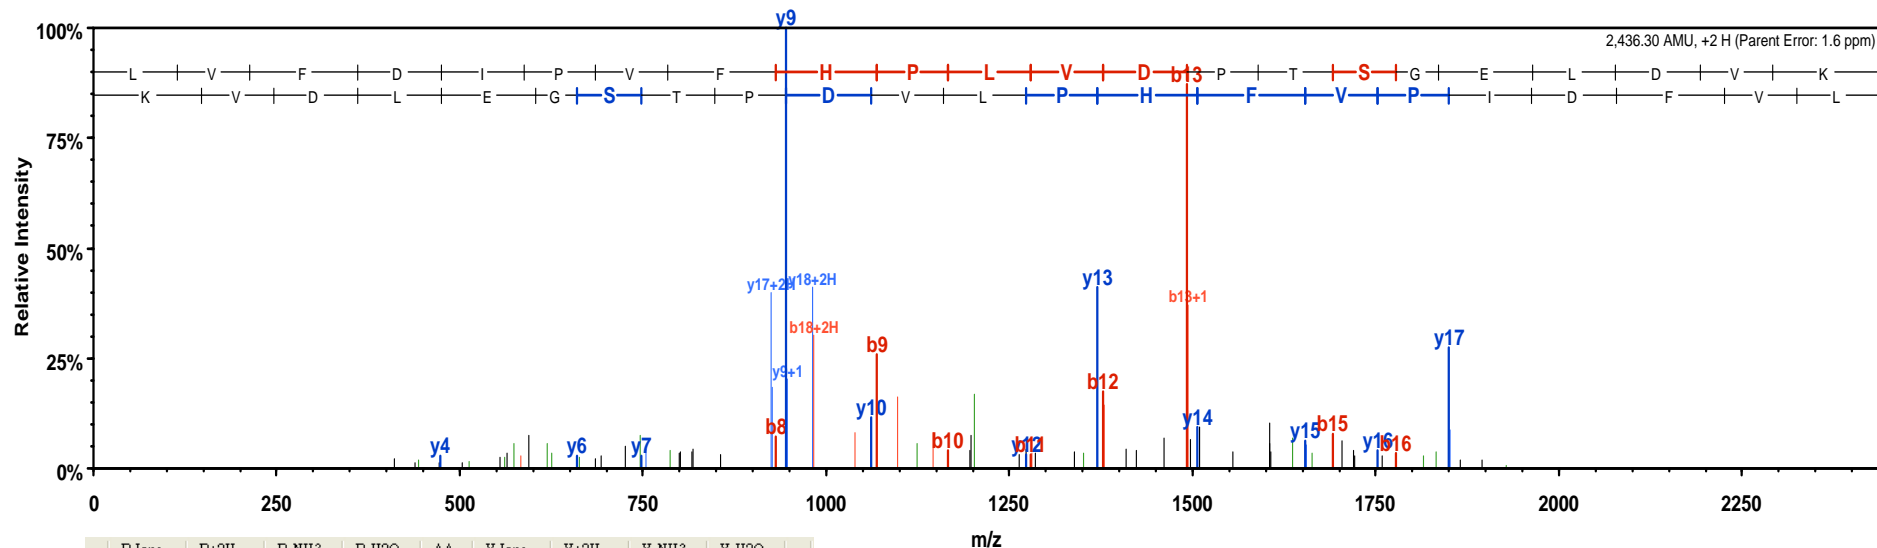

| ... | B Ions  | B+2H    | B-NH3   | B-H2O   | AA | Y Ions  | Y+2H    | Y-NH3   | Y-H2O   | ... |
|-----|---------|---------|---------|---------|----|---------|---------|---------|---------|-----|
| 1   | 114.1   |         |         |         | L  | 2,437.3 | 1,219.2 | 2,420.3 | 2,419.3 | 22  |
| 2   | 213.2   |         |         |         | V  | 2,324.2 | 1,162.6 | 2,307.2 | 2,306.2 | 21  |
| 3   | 360.2   |         |         |         | F  | 2,225.1 | 1,113.1 | 2,208.1 | 2,207.1 | 20  |
| 4   | 475.3   |         |         | 457.2   | D  | 2,078.1 | 1,039.5 | 2,061.1 | 2,060.1 | 19  |
| 5   | 588.3   |         |         | 570.3   | I  | 1,963.1 | 982.0   | 1,946.0 | 1,945.0 | 18  |
| 6   | 685.4   | 343.2   |         | 667.4   | P  | 1,850.0 | 925.5   | 1,832.9 | 1,832.0 | 17  |
| 7   | 784.5   | 392.7   |         | 766.4   | V  | 1,752.9 | 877.0   | 1,735.9 | 1,734.9 | 16  |
| 8   | 931.5   | 466.3   |         | 913.5   | F  | 1,653.8 | 827.4   | 1,636.8 | 1,635.8 | 15  |
| 9   | 1,068.6 | 534.8   |         | 1,050.6 | H  | 1,506.8 | 753.9   | 1,489.8 | 1,488.8 | 14  |
| 10  | 1,165.6 | 583.3   |         | 1,147.6 | P  | 1,369.7 | 685.4   | 1,352.7 | 1,351.7 | 13  |
| 11  | 1,278.7 | 639.9   |         | 1,260.7 | L  | 1,272.7 | 636.8   | 1,255.6 | 1,254.7 | 12  |
| 12  | 1,377.8 | 689.4   |         | 1,359.8 | V  | 1,159.6 | 580.3   | 1,142.6 | 1,141.6 | 11  |
| 13  | 1,492.8 | 746.9   |         | 1,474.8 | D  | 1,060.5 | 530.8   | 1,043.5 | 1,042.5 | 10  |
| 14  | 1,589.9 | 795.4   |         | 1,571.9 | P  | 945.5   | 473.2   | 928.5   | 927.5   | 9   |
| 15  | 1,690.9 | 846.0   |         | 1,672.9 | T  | 848.4   | 424.7   | 831.4   | 830.4   | 8   |
| 16  | 1,778.0 | 889.5   |         | 1,759.9 | S  | 747.4   | 374.2   | 730.4   | 729.4   | 7   |
| 17  | 1,835.0 | 918.0   |         | 1,817.0 | G  | 660.4   | 330.7   | 643.3   | 642.3   | 6   |
| 18  | 1,964.0 | 982.5   |         | 1,946.0 | E  | 603.3   |         | 586.3   | 585.3   | 5   |
| 19  | 2,077.1 | 1,039.1 |         | 2,059.1 | L  | 474.3   |         | 457.3   | 456.3   | 4   |
| 20  | 2,192.1 | 1,096.6 |         | 2,174.1 | D  | 361.2   |         | 344.2   | 343.2   | 3   |
| 21  | 2,291.2 | 1,146.1 |         |         | V  | 246.2   |         | 229.2   |         | 2   |
| 22  | 2,437.3 | 1,219.2 | 2,420.3 | 2,419.3 | K  | 147.1   |         | 130.1   |         | 1   |

# Whole proteome

| Protein No. | Leading protein name  | Sequence      | Mascot Score | Variable Modifications | SILAC State | Charge | m/z       |
|-------------|-----------------------|---------------|--------------|------------------------|-------------|--------|-----------|
| W-119       | splP22531ISPR2E_HUMAN | CPPVTPSPPCQPK | 35.51        | Unmodified             | Light       | 2      | 732.85232 |

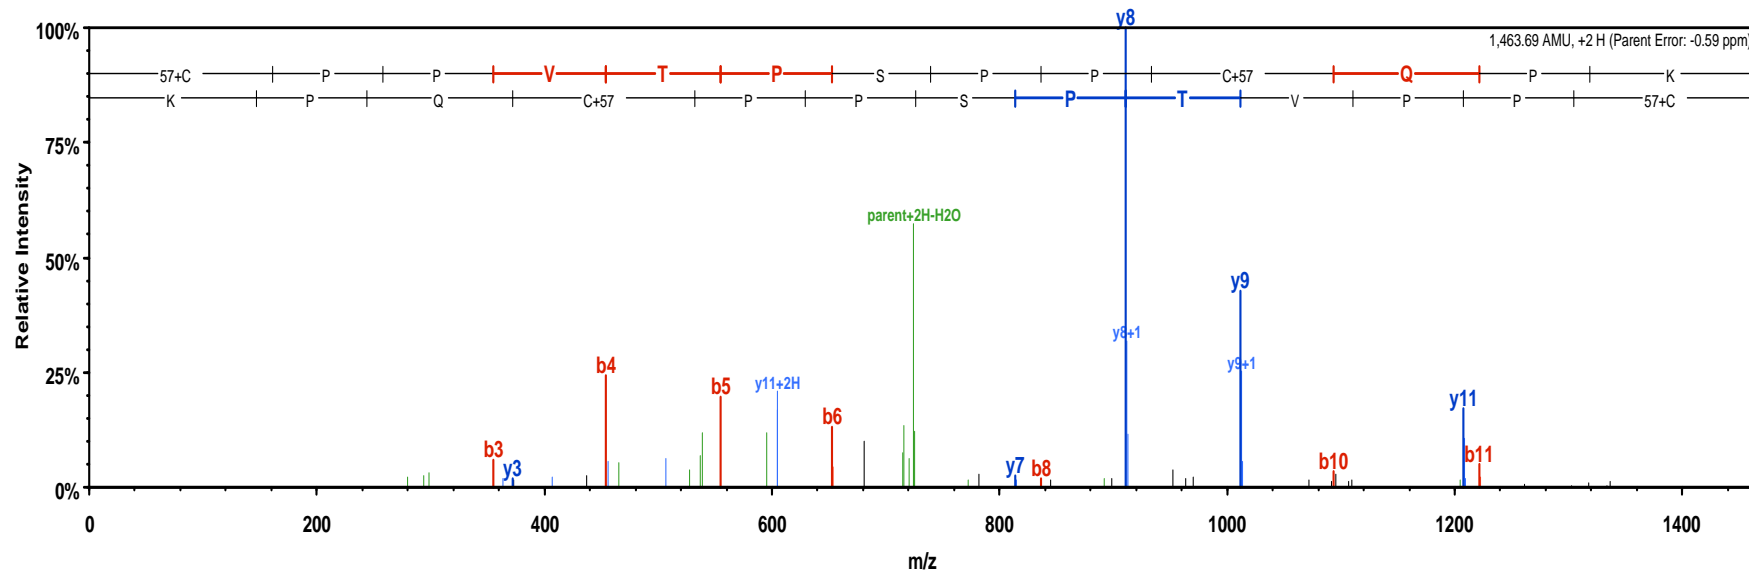

| ... | B Ions  | B+2H  | B-NH3   | B-H2O   | AA   | Y Ions  | Y+2H  | Y-NH3   | Y-H2O   | ... |
|-----|---------|-------|---------|---------|------|---------|-------|---------|---------|-----|
| 1   | 161.0   |       |         |         | C+57 | 1,464.7 | 732.9 | 1,447.7 | 1,446.7 | 13  |
| 2   | 258.1   |       |         |         | P    | 1,304.7 | 652.8 | 1,287.6 | 1,286.7 | 12  |
| 3   | 355.1   |       |         |         | P    | 1,207.6 | 604.3 | 1,190.6 | 1,189.6 | 11  |
| 4   | 454.2   |       |         |         | V    | 1,110.6 | 555.8 | 1,093.5 | 1,092.6 | 10  |
| 5   | 555.3   |       |         |         | T    | 1,011.5 | 506.3 | 994.5   | 993.5   | 9   |
| 6   | 652.3   | 326.7 |         | 634.3   | P    | 910.4   | 455.7 | 893.4   | 892.4   | 8   |
| 7   | 739.3   | 370.2 |         | 721.3   | S    | 813.4   | 407.2 | 796.4   | 795.4   | 7   |
| 8   | 836.4   | 418.7 |         | 818.4   | P    | 726.4   | 363.7 | 709.3   |         | 6   |
| 9   | 933.5   | 467.2 |         | 915.4   | P    | 629.3   |       | 612.3   |         | 5   |
| 10  | 1,093.5 | 547.2 |         | 1,075.5 | C+57 | 532.3   |       | 515.2   |         | 4   |
| 11  | 1,221.5 | 611.3 | 1,204.5 | 1,203.5 | Q    | 372.2   |       | 355.2   |         | 3   |
| 12  | 1,318.6 | 659.8 | 1,301.6 | 1,300.6 | P    | 244.2   |       | 227.1   |         | 2   |
| 13  | 1,464.7 | 732.9 | 1,447.7 | 1,446.7 | K    | 147.1   |       | 130.1   |         | 1   |



# Whole proteome

| Protein No. | Leading protein name | Sequence     | Mascot Score | Variable Modifications | SILAC State | Charge | m/z       |
|-------------|----------------------|--------------|--------------|------------------------|-------------|--------|-----------|
| W-120       | splP61626LYSC_HUMAN  | GISLANWMCLAK | 34.86        | Unmodified             | Light       | 2      | 682.34668 |

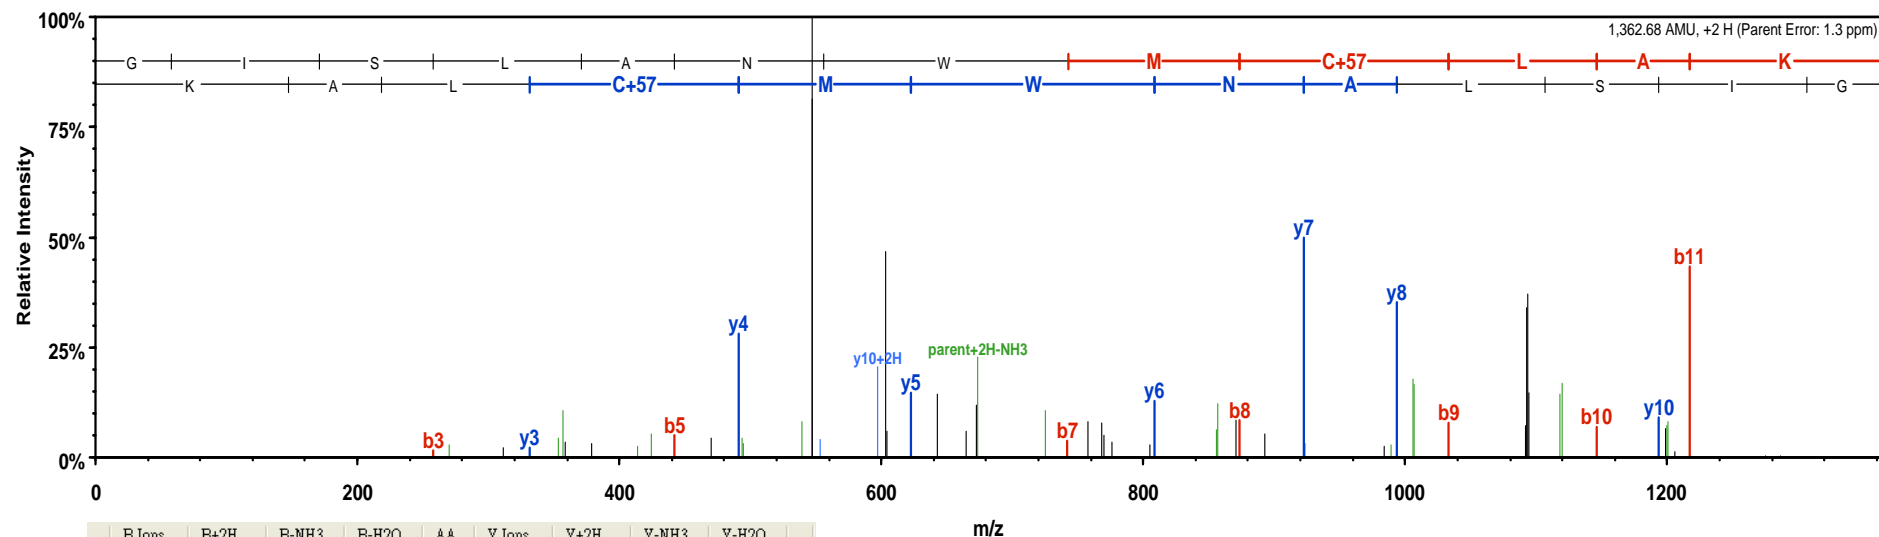

| ... | B Ions  | B+2H  | B-NH3   | B-H2O   | AA   | Y Ions  | Y+2H  | Y-NH3   | Y-H2O   | ... |
|-----|---------|-------|---------|---------|------|---------|-------|---------|---------|-----|
| 1   | 58.0    |       |         |         | G    | 1,363.7 | 682.3 | 1,346.7 | 1,345.7 | 12  |
| 2   | 171.1   |       |         |         | I    | 1,306.7 | 653.8 | 1,289.6 | 1,288.7 | 11  |
| 3   | 258.1   |       |         | 240.1   | S    | 1,193.6 | 597.3 | 1,176.6 | 1,175.6 | 10  |
| 4   | 371.2   |       |         | 353.2   | L    | 1,106.5 | 553.8 | 1,089.5 |         | 9   |
| 5   | 442.3   |       |         | 424.3   | A    | 993.5   | 497.2 | 976.4   |         | 8   |
| 6   | 556.3   | 278.7 | 539.3   | 538.3   | N    | 922.4   | 461.7 | 905.4   |         | 7   |
| 7   | 742.4   | 371.7 | 725.4   | 724.4   | W    | 808.4   | 404.7 | 791.4   |         | 6   |
| 8   | 873.4   | 437.2 | 856.4   | 855.4   | M    | 622.3   |       | 605.3   |         | 5   |
| 9   | 1,033.5 | 517.2 | 1,016.4 | 1,015.4 | C+57 | 491.3   |       | 474.2   |         | 4   |
| 10  | 1,146.5 | 573.8 | 1,129.5 | 1,128.5 | L    | 331.2   |       | 314.2   |         | 3   |
| 11  | 1,217.6 | 609.3 | 1,200.6 | 1,199.6 | A    | 218.1   |       | 201.1   |         | 2   |
| 12  | 1,363.7 | 682.3 | 1,346.7 | 1,345.7 | K    | 147.1   |       | 130.1   |         | 1   |

# Whole proteome

| Protein No. | Leading protein name  | Sequence            | Mascot Score | Variable Modifications | SILAC State | Charge | m/z       |
|-------------|-----------------------|---------------------|--------------|------------------------|-------------|--------|-----------|
| W-121       | splQ8WVK2ISNR27_HUMAN | QITEEDLEGKTEEEIEMMK | 33.42        | Unmodified             | Light       | 3      | 761.35199 |

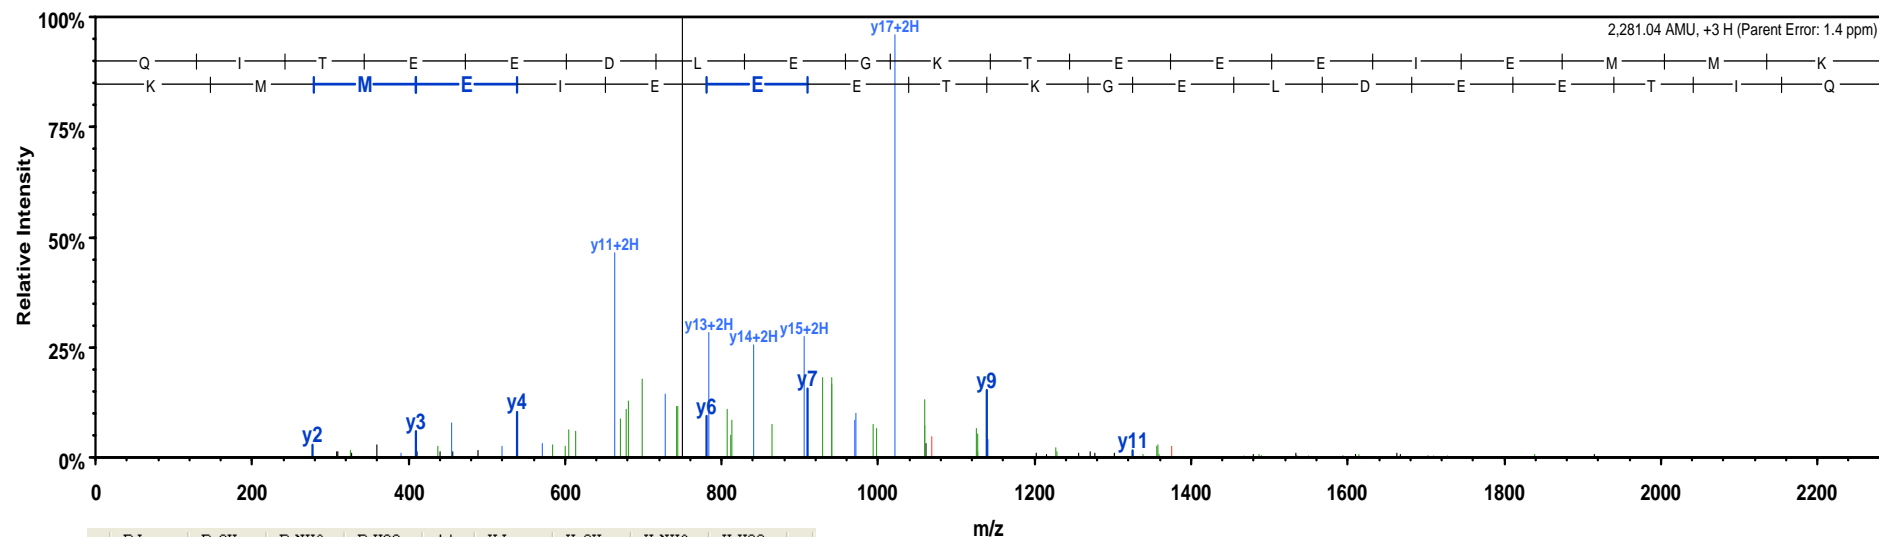

| ... | B Ions  | B+2H    | B-NH3   | B-H2O   | AA | Y Ions  | Y+2H    | Y-NH3   | Y-H2O   | ... |
|-----|---------|---------|---------|---------|----|---------|---------|---------|---------|-----|
| 1   | 129.1   |         | 112.0   |         | Q  | 2,282.0 | 1,141.5 | 2,265.0 | 2,264.0 | 19  |
| 2   | 242.1   |         | 225.1   |         | I  | 2,154.0 | 1,077.5 | 2,137.0 | 2,136.0 | 18  |
| 3   | 343.2   |         | 326.2   | 325.2   | T  | 2,040.9 | 1,021.0 | 2,023.9 | 2,022.9 | 17  |
| 4   | 472.2   |         | 455.2   | 454.2   | E  | 1,939.9 | 970.4   | 1,922.8 | 1,921.8 | 16  |
| 5   | 601.3   |         | 584.3   | 583.3   | E  | 1,810.8 | 905.9   | 1,793.8 | 1,792.8 | 15  |
| 6   | 716.3   | 358.7   | 699.3   | 698.3   | D  | 1,681.8 | 841.4   | 1,664.7 | 1,663.8 | 14  |
| 7   | 829.4   | 415.2   | 812.4   | 811.4   | L  | 1,566.7 | 783.9   | 1,549.7 | 1,548.7 | 13  |
| 8   | 958.4   | 479.7   | 941.4   | 940.4   | E  | 1,453.7 | 727.3   | 1,436.6 | 1,435.6 | 12  |
| 9   | 1,015.5 | 508.2   | 998.4   | 997.4   | G  | 1,324.6 | 662.8   | 1,307.6 | 1,306.6 | 11  |
| 10  | 1,143.6 | 572.3   | 1,126.5 | 1,125.5 | K  | 1,267.6 | 634.3   | 1,250.6 | 1,249.6 | 10  |
| 11  | 1,244.6 | 622.8   | 1,227.6 | 1,226.6 | T  | 1,139.5 | 570.3   | 1,122.5 | 1,121.5 | 9   |
| 12  | 1,373.6 | 687.3   | 1,356.6 | 1,355.6 | E  | 1,038.4 | 519.7   | 1,021.4 | 1,020.4 | 8   |
| 13  | 1,502.7 | 751.8   | 1,485.7 | 1,484.7 | E  | 909.4   | 455.2   | 892.4   | 891.4   | 7   |
| 14  | 1,631.7 | 816.4   | 1,614.7 | 1,613.7 | E  | 780.4   | 390.7   | 763.3   | 762.4   | 6   |
| 15  | 1,744.8 | 872.9   | 1,727.8 | 1,726.8 | I  | 651.3   |         | 634.3   | 633.3   | 5   |
| 16  | 1,873.9 | 937.4   | 1,856.8 | 1,855.8 | E  | 538.2   |         | 521.2   | 520.2   | 4   |
| 17  | 2,004.9 | 1,003.0 | 1,987.9 | 1,986.9 | M  | 409.2   |         | 392.2   |         | 3   |
| 18  | 2,135.9 | 1,068.5 | 2,118.9 | 2,117.9 | M  | 278.2   |         | 261.1   |         | 2   |
| 19  | 2,282.0 | 1,141.5 | 2,265.0 | 2,264.0 | K  | 147.1   |         | 130.1   |         | 1   |

# Whole proteome

| Protein No. | Leading protein name | Sequence           | Mascot Score | Variable Modifications | SILAC State | Charge | m/z       |
|-------------|----------------------|--------------------|--------------|------------------------|-------------|--------|-----------|
| W-122       | splQ96SW2ICRBN_HUMAN | SALLPTIPDTEDEISPDK | 33.06        | Unmodified             | Heavy       | 2      | 970.98859 |

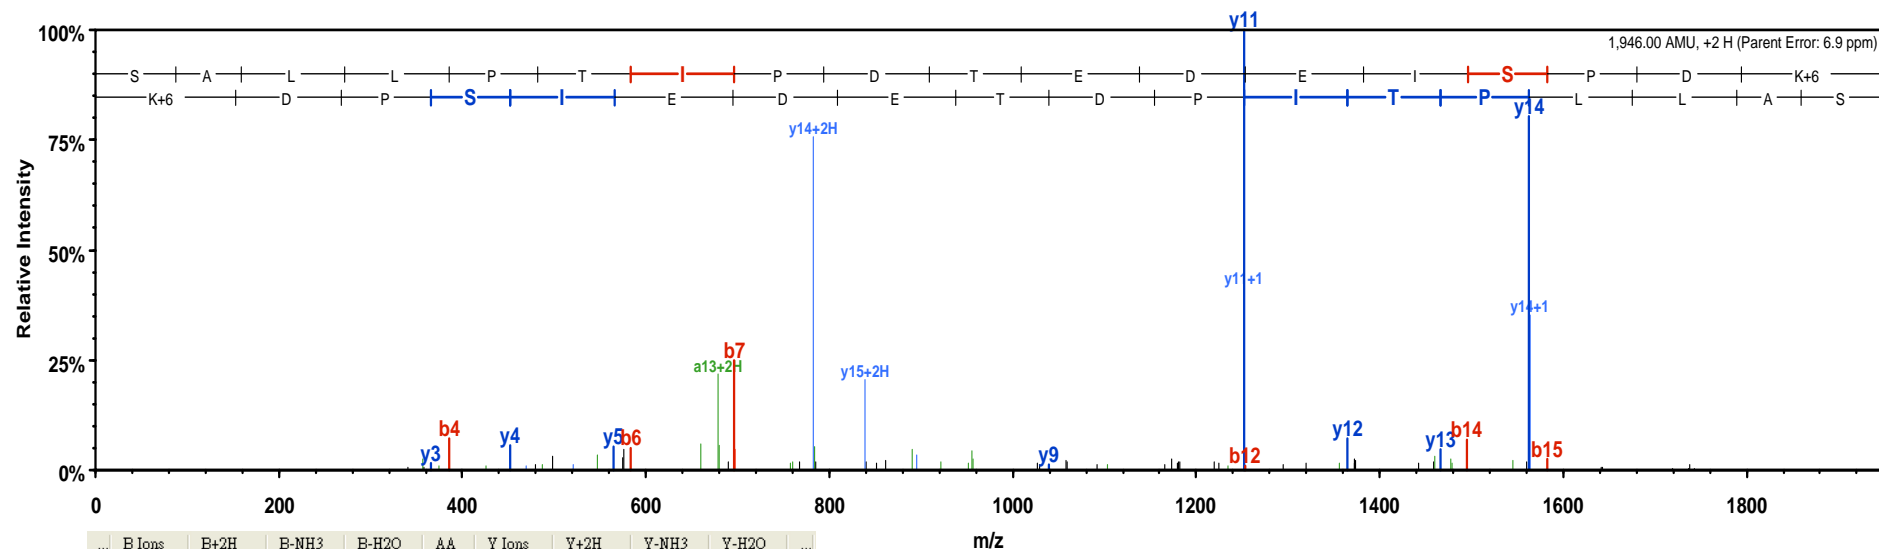

| ... | B Ions  | B+2H  | B-NH3   | B-H2O   | AA  | Y Ions  | Y+2H  | Y-NH3   | Y-H2O   | ... |
|-----|---------|-------|---------|---------|-----|---------|-------|---------|---------|-----|
| 1   | 88.0    |       |         | 70.0    | S   | 1,947.0 | 974.0 | 1,930.0 | 1,929.0 | 18  |
| 2   | 159.1   |       |         | 141.1   | A   | 1,860.0 | 930.5 | 1,842.9 | 1,841.9 | 17  |
| 3   | 272.2   |       |         | 254.1   | L   | 1,788.9 | 895.0 | 1,771.9 | 1,770.9 | 16  |
| 4   | 385.2   |       |         | 367.2   | L   | 1,675.8 | 838.4 | 1,658.8 | 1,657.8 | 15  |
| 5   | 482.3   |       |         | 464.3   | P   | 1,562.8 | 781.9 | 1,545.7 | 1,544.7 | 14  |
| 6   | 583.3   | 292.2 |         | 565.3   | T   | 1,465.7 | 733.4 | 1,448.7 | 1,447.7 | 13  |
| 7   | 696.4   | 348.7 |         | 678.4   | I   | 1,364.7 | 682.8 | 1,347.6 | 1,346.6 | 12  |
| 8   | 793.5   | 397.2 |         | 775.5   | P   | 1,251.6 | 626.3 | 1,234.5 | 1,233.6 | 11  |
| 9   | 908.5   | 454.8 |         | 890.5   | D   | 1,154.5 | 577.8 | 1,137.5 | 1,136.5 | 10  |
| 10  | 1,009.6 | 505.3 |         | 991.5   | T   | 1,039.5 | 520.2 | 1,022.5 | 1,021.5 | 9   |
| 11  | 1,138.6 | 569.8 |         | 1,120.6 | E   | 938.4   | 469.7 | 921.4   | 920.4   | 8   |
| 12  | 1,253.6 | 627.3 |         | 1,235.6 | D   | 809.4   | 405.2 | 792.4   | 791.4   | 7   |
| 13  | 1,382.7 | 691.8 |         | 1,364.7 | E   | 694.4   | 347.7 | 677.3   | 676.4   | 6   |
| 14  | 1,495.8 | 748.4 |         | 1,477.7 | I   | 565.3   |       | 548.3   | 547.3   | 5   |
| 15  | 1,582.8 | 791.9 |         | 1,564.8 | S   | 452.2   |       | 435.2   | 434.2   | 4   |
| 16  | 1,679.8 | 840.4 |         | 1,661.8 | P   | 365.2   |       | 348.2   | 347.2   | 3   |
| 17  | 1,794.9 | 897.9 |         | 1,776.9 | D   | 268.2   |       | 251.1   | 250.1   | 2   |
| 18  | 1,947.0 | 974.0 | 1,930.0 | 1,929.0 | K+6 | 153.1   |       | 136.1   |         | 1   |

# Whole proteome

| Protein No. | Leading protein name  | Sequence       | Mascot Score | Variable Modifications | SILAC State | Charge | m/z       |
|-------------|-----------------------|----------------|--------------|------------------------|-------------|--------|-----------|
| W-123       | splQ8N6N3ICA052_HUMAN | SVTRPAFLYNPLNK | 32.38        | Unmodified             | Light       | 2      | 810.44884 |

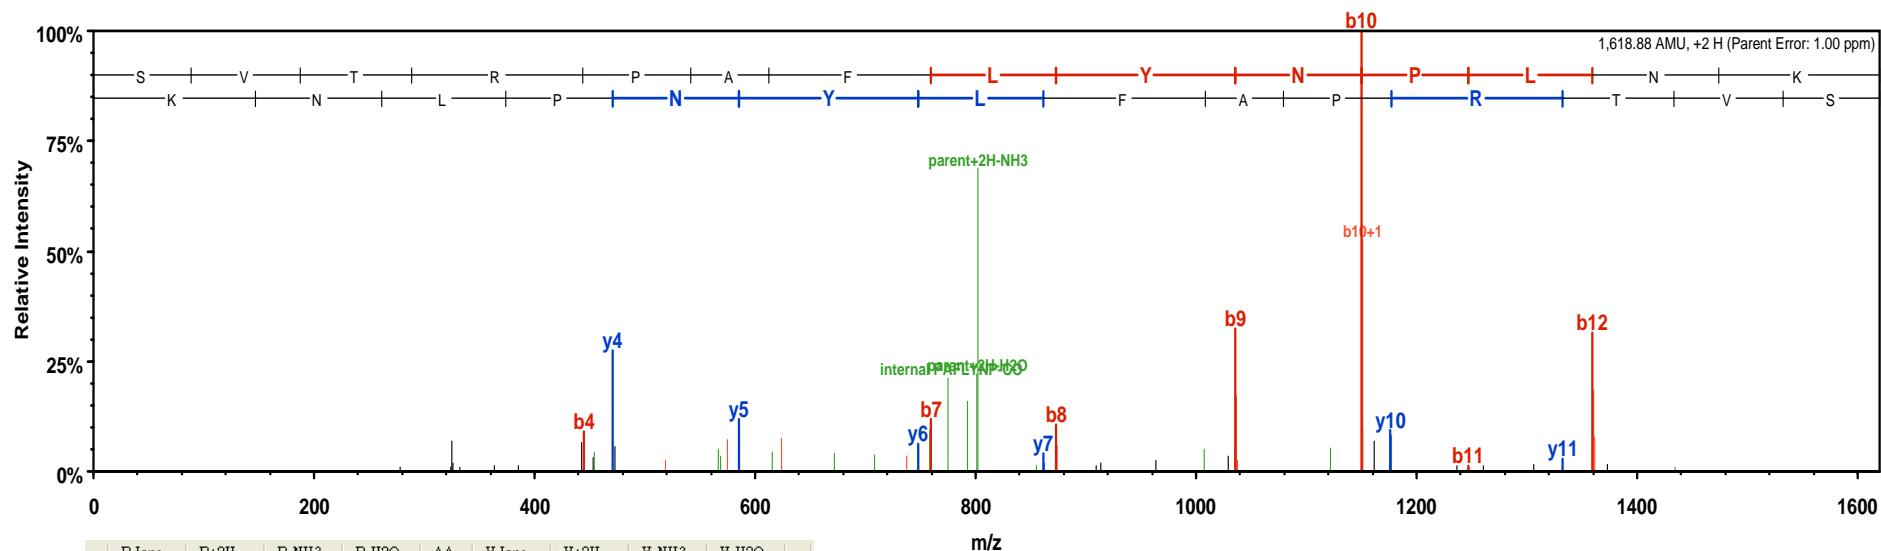

| ... | B Ions  | B+2H  | B-NH3   | B-H2O   | AA | Y Ions  | Y+2H  | Y-NH3   | Y-H2O   | ... |
|-----|---------|-------|---------|---------|----|---------|-------|---------|---------|-----|
| 1   | 88.0    |       |         | 70.0    | S  | 1,619.9 | 810.4 | 1,602.9 | 1,601.9 | 14  |
| 2   | 187.1   |       |         | 169.1   | V  | 1,532.9 | 766.9 | 1,515.8 | 1,514.8 | 13  |
| 3   | 288.2   |       |         | 270.1   | T  | 1,433.8 | 717.4 | 1,416.8 | 1,415.8 | 12  |
| 4   | 444.3   | 222.6 | 427.2   | 426.2   | R  | 1,332.7 | 666.9 | 1,315.7 |         | 11  |
| 5   | 541.3   | 271.2 | 524.3   | 523.3   | P  | 1,176.6 | 588.8 | 1,159.6 |         | 10  |
| 6   | 612.3   | 306.7 | 595.3   | 594.3   | A  | 1,079.6 | 540.3 | 1,062.6 |         | 9   |
| 7   | 759.4   | 380.2 | 742.4   | 741.4   | F  | 1,008.6 | 504.8 | 991.5   |         | 8   |
| 8   | 872.5   | 436.8 | 855.5   | 854.5   | L  | 861.5   | 431.2 | 844.5   |         | 7   |
| 9   | 1,035.6 | 518.3 | 1,018.5 | 1,017.6 | Y  | 748.4   | 374.7 | 731.4   |         | 6   |
| 10  | 1,149.6 | 575.3 | 1,132.6 | 1,131.6 | N  | 585.3   |       | 568.3   |         | 5   |
| 11  | 1,246.7 | 623.8 | 1,229.6 | 1,228.6 | P  | 471.3   |       | 454.3   |         | 4   |
| 12  | 1,359.7 | 680.4 | 1,342.7 | 1,341.7 | L  | 374.2   |       | 357.2   |         | 3   |
| 13  | 1,473.8 | 737.4 | 1,456.8 | 1,455.8 | N  | 261.2   |       | 244.1   |         | 2   |
| 14  | 1,619.9 | 810.4 | 1,602.9 | 1,601.9 | K  | 147.1   |       | 130.1   |         | 1   |

# Whole proteome

| Protein No. | Leading protein name  | Sequence           | Mascot Score | Variable Modifications | SILAC State | Charge | m/z       |
|-------------|-----------------------|--------------------|--------------|------------------------|-------------|--------|-----------|
| W-124       | splQ562R1IACTBL_HUMAN | VAPDEHPILLTEAPLNPK | 27.28        | Unmodified             | Light       | 3      | 652.02632 |

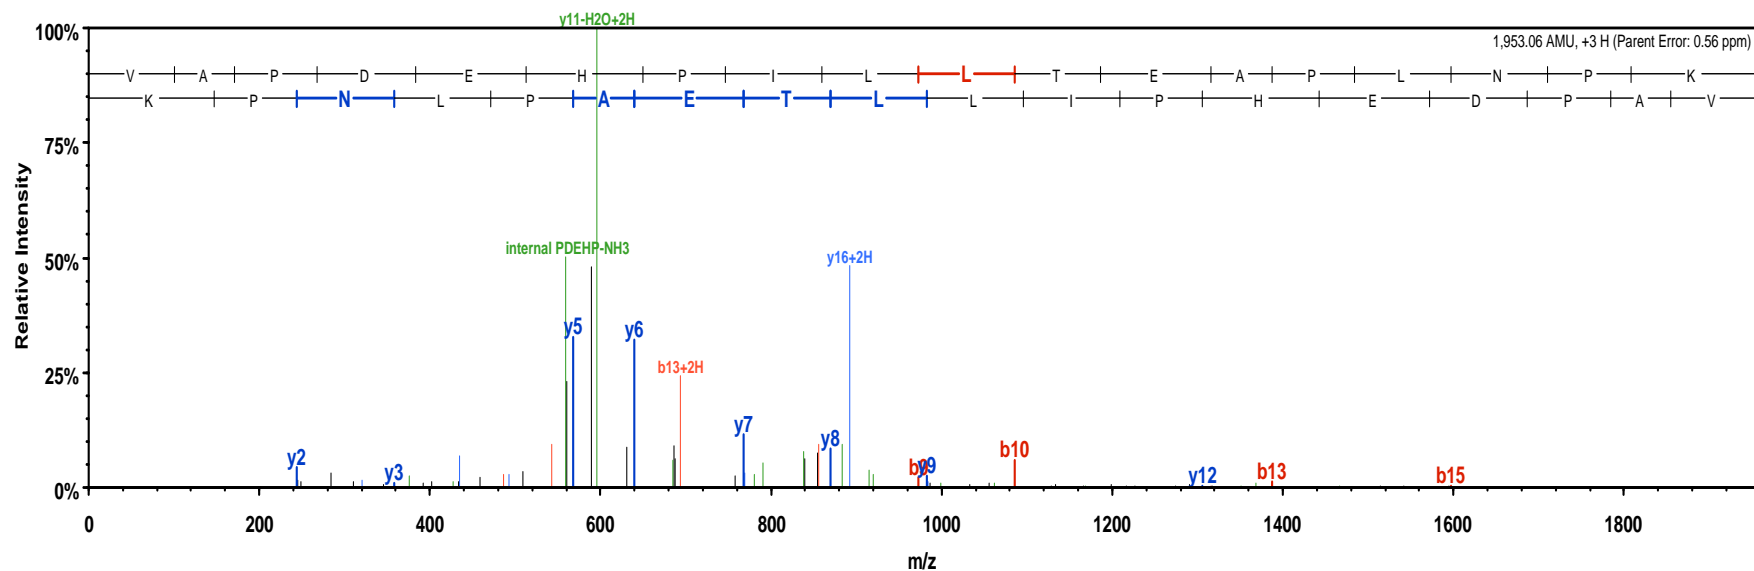

| ... | B Ions  | B+2H  | B-NH3   | B-H2O   | AA | Y Ions  | Y+2H  | Y-NH3   | Y-H2O   | ... |
|-----|---------|-------|---------|---------|----|---------|-------|---------|---------|-----|
| 1   | 100.1   |       |         |         | V  | 1,954.1 | 977.5 | 1,937.0 | 1,936.1 | 18  |
| 2   | 171.1   |       |         |         | A  | 1,855.0 | 928.0 | 1,838.0 | 1,837.0 | 17  |
| 3   | 268.2   |       |         |         | P  | 1,784.0 | 892.5 | 1,766.9 | 1,765.9 | 16  |
| 4   | 383.2   |       |         | 365.2   | D  | 1,686.9 | 844.0 | 1,669.9 | 1,668.9 | 15  |
| 5   | 512.2   |       |         | 494.2   | E  | 1,571.9 | 786.4 | 1,554.9 | 1,553.9 | 14  |
| 6   | 649.3   | 325.2 |         | 631.3   | H  | 1,442.8 | 721.9 | 1,425.8 | 1,424.8 | 13  |
| 7   | 746.3   | 373.7 |         | 728.3   | P  | 1,305.8 | 653.4 | 1,288.8 | 1,287.8 | 12  |
| 8   | 859.4   | 430.2 |         | 841.4   | I  | 1,208.7 | 604.9 | 1,191.7 | 1,190.7 | 11  |
| 9   | 972.5   | 486.8 |         | 954.5   | L  | 1,095.6 | 548.3 | 1,078.6 | 1,077.6 | 10  |
| 10  | 1,085.6 | 543.3 |         | 1,067.6 | L  | 982.6   | 491.8 | 965.5   | 964.5   | 9   |
| 11  | 1,186.6 | 593.8 |         | 1,168.6 | T  | 869.5   | 435.2 | 852.4   | 851.5   | 8   |
| 12  | 1,315.7 | 658.3 |         | 1,297.7 | E  | 768.4   | 384.7 | 751.4   | 750.4   | 7   |
| 13  | 1,386.7 | 693.9 |         | 1,368.7 | A  | 639.4   | 320.2 | 622.4   |         | 6   |
| 14  | 1,483.8 | 742.4 |         | 1,465.8 | P  | 568.3   |       | 551.3   |         | 5   |
| 15  | 1,596.9 | 798.9 |         | 1,578.9 | L  | 471.3   |       | 454.3   |         | 4   |
| 16  | 1,710.9 | 856.0 | 1,693.9 | 1,692.9 | N  | 358.2   |       | 341.2   |         | 3   |
| 17  | 1,808.0 | 904.5 | 1,790.9 | 1,789.9 | P  | 244.2   |       | 227.1   |         | 2   |
| 18  | 1,954.1 | 977.5 | 1,937.0 | 1,936.1 | K  | 147.1   |       | 130.1   |         | 1   |

# Whole proteome

| Protein No. | Leading protein name  | Sequence  | Mascot Score | Variable Modifications | SILAC State | Charge | m/z       |
|-------------|-----------------------|-----------|--------------|------------------------|-------------|--------|-----------|
| W-125       | splQ9UHQ4IBAP29_HUMAN | IFSFNVWGK | 27.04        | Unmodified             | Heavy       | 2      | 549.29256 |

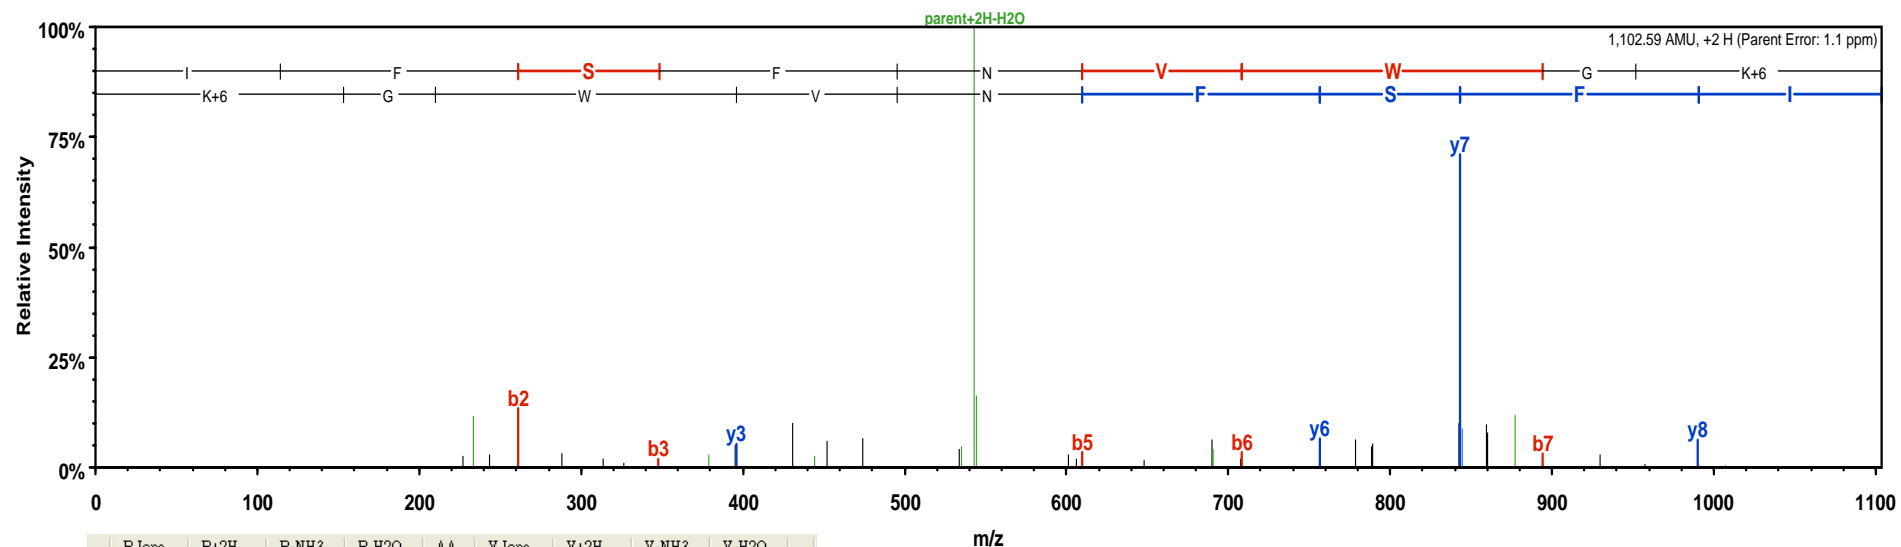

| ... | E Ions  | B+2H  | B-NH3   | B-H2O   | AA  | Y Ions  | Y+2H  | Y-NH3   | Y-H2O   | ... |
|-----|---------|-------|---------|---------|-----|---------|-------|---------|---------|-----|
| 1   | 114.1   |       |         |         | I   | 1,103.6 | 552.3 | 1,086.6 | 1,085.6 | 9   |
| 2   | 261.2   |       |         |         | F   | 990.5   | 495.8 | 973.5   | 972.5   | 8   |
| 3   | 348.2   |       |         | 330.2   | S   | 843.4   | 422.2 | 826.4   | 825.4   | 7   |
| 4   | 495.3   |       |         | 477.2   | F   | 756.4   | 378.7 | 739.4   |         | 6   |
| 5   | 609.3   |       | 592.3   | 591.3   | N   | 609.3   |       | 592.3   |         | 5   |
| 6   | 708.4   | 354.7 | 691.3   | 690.4   | V   | 495.3   |       | 478.3   |         | 4   |
| 7   | 894.5   | 447.7 | 877.4   | 876.4   | W   | 396.2   |       | 379.2   |         | 3   |
| 8   | 951.5   | 476.2 | 934.4   | 933.5   | G   | 210.2   |       | 193.1   |         | 2   |
| 9   | 1,103.6 | 552.3 | 1,086.6 | 1,085.6 | K+6 | 153.1   |       | 136.1   |         | 1   |

# Whole proteome

| Protein No. | Leading protein name  | Sequence                      | Mascot Score | Variable Modifications | SILAC State | Charge | m/z       |
|-------------|-----------------------|-------------------------------|--------------|------------------------|-------------|--------|-----------|
| W-126       | splQ9Y287IITM2B_HUMAN | SGEEALIIPPDAVAVDCKDPDDVVPVGQR | 26.31        | Unmodified             | Light       | 3      | 1021.1764 |

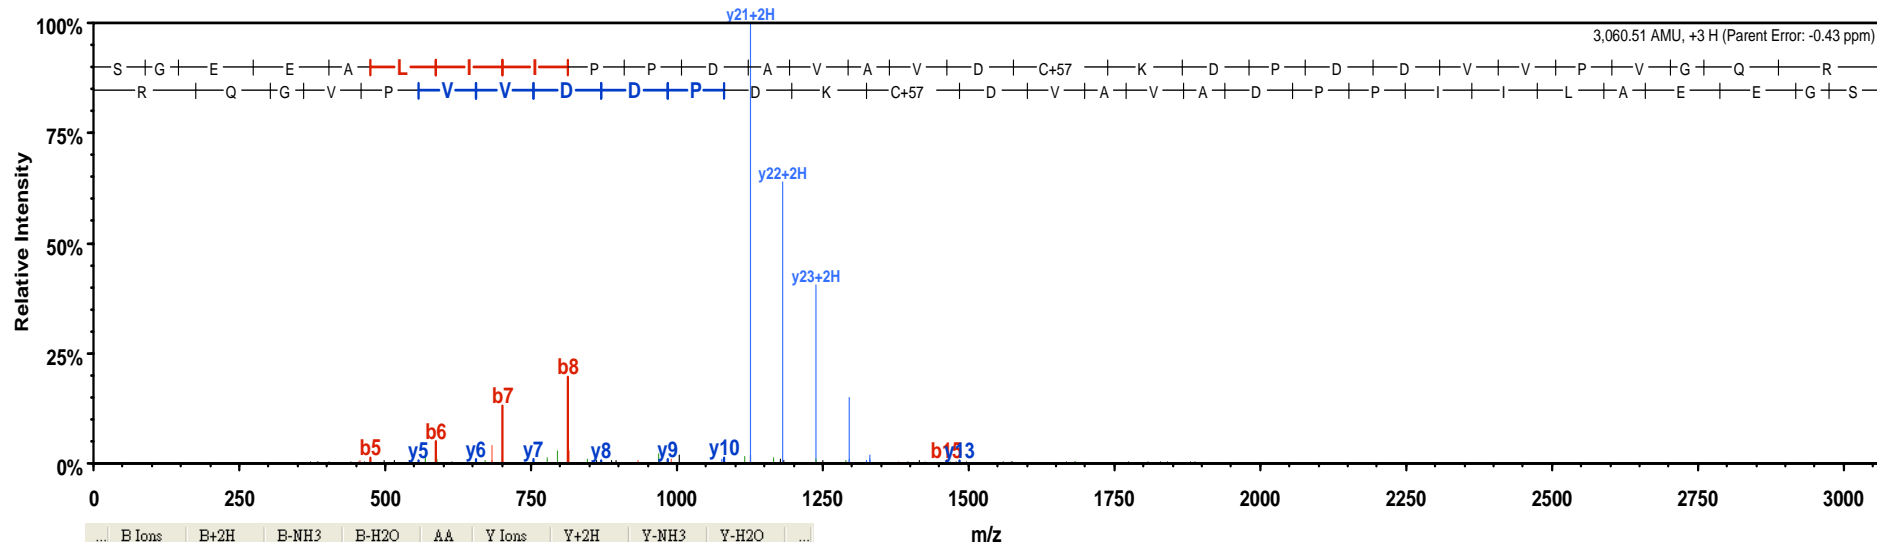

| ... | B Ions  | B+2H    | B-NH3   | B-H2O   | AA   | Y Ions  | Y+2H    | Y-NH3   | Y-H2O   | ... |
|-----|---------|---------|---------|---------|------|---------|---------|---------|---------|-----|
| 1   | 88.0    |         |         | 70.0    | S    | 3,061.5 | 1,531.3 | 3,044.5 | 3,043.5 | 29  |
| 2   | 145.1   |         |         | 127.1   | G    | 2,974.5 | 1,487.7 | 2,957.5 | 2,956.5 | 28  |
| 3   | 274.1   |         |         | 256.1   | E    | 2,917.5 | 1,459.2 | 2,900.4 | 2,899.5 | 27  |
| 4   | 403.1   |         |         | 385.1   | A    | 2,788.4 | 1,394.7 | 2,771.4 | 2,770.4 | 26  |
| 5   | 474.2   |         |         | 456.2   | A    | 2,659.4 | 1,330.2 | 2,642.3 | 2,641.4 | 25  |
| 6   | 587.3   | 294.1   |         | 569.3   | L    | 2,588.3 | 1,294.7 | 2,571.3 | 2,570.3 | 24  |
| 7   | 700.4   | 350.7   |         | 682.3   | I    | 2,475.3 | 1,238.1 | 2,458.2 | 2,457.2 | 23  |
| 8   | 813.4   | 407.2   |         | 795.4   | I    | 2,362.2 | 1,181.6 | 2,345.1 | 2,344.2 | 22  |
| 9   | 910.5   | 455.7   |         | 892.5   | P    | 2,249.1 | 1,125.0 | 2,232.1 | 2,231.1 | 21  |
| 10  | 1,007.5 | 504.3   |         | 989.5   | P    | 2,152.0 | 1,076.5 | 2,135.0 | 2,134.0 | 20  |
| 11  | 1,122.6 | 561.8   |         | 1,104.6 | D    | 2,055.0 | 1,028.0 | 2,038.0 | 2,037.0 | 19  |
| 12  | 1,193.6 | 597.3   |         | 1,175.6 | A    | 1,940.0 | 970.5   | 1,922.9 | 1,921.9 | 18  |
| 13  | 1,292.7 | 646.8   |         | 1,274.7 | V    | 1,868.9 | 935.0   | 1,851.9 | 1,850.9 | 17  |
| 14  | 1,363.7 | 682.4   |         | 1,345.7 | A    | 1,769.8 | 885.4   | 1,752.8 | 1,751.8 | 16  |
| 15  | 1,462.8 | 731.9   |         | 1,444.8 | V    | 1,698.8 | 849.9   | 1,681.8 | 1,680.8 | 15  |
| 16  | 1,577.8 | 789.4   |         | 1,559.8 | D    | 1,599.7 | 800.4   | 1,582.7 | 1,581.7 | 14  |
| 17  | 1,737.8 | 869.4   |         | 1,719.8 | C+57 | 1,484.7 | 742.9   | 1,467.7 | 1,466.7 | 13  |
| 18  | 1,865.9 | 933.5   | 1,848.9 | 1,847.9 | K    | 1,324.7 | 662.8   | 1,307.7 | 1,306.7 | 12  |
| 19  | 1,981.0 | 991.0   | 1,963.9 | 1,962.9 | D    | 1,196.6 | 598.8   | 1,179.6 | 1,178.6 | 11  |
| 20  | 2,078.0 | 1,039.5 | 2,061.0 | 2,060.0 | P    | 1,081.6 | 541.3   | 1,064.5 | 1,063.6 | 10  |
| 21  | 2,193.0 | 1,097.0 | 2,176.0 | 2,175.0 | D    | 984.5   | 492.8   | 967.5   | 966.5   | 9   |
| 22  | 2,308.1 | 1,154.5 | 2,291.0 | 2,290.1 | D    | 869.5   | 435.2   | 852.5   | 851.5   | 8   |
| 23  | 2,407.1 | 1,204.1 | 2,390.1 | 2,389.1 | V    | 754.5   | 377.7   | 737.4   |         | 7   |
| 24  | 2,506.2 | 1,253.6 | 2,489.2 | 2,488.2 | V    | 655.4   | 328.2   | 638.4   |         | 6   |
| 25  | 2,603.3 | 1,302.1 | 2,586.2 | 2,585.2 | P    | 556.3   |         | 539.3   |         | 5   |
| 26  | 2,702.3 | 1,351.7 | 2,685.3 | 2,684.3 | V    | 459.3   |         | 442.2   |         | 4   |
| 27  | 2,759.3 | 1,380.2 | 2,742.3 | 2,741.3 | G    | 360.2   |         | 343.2   |         | 3   |
| 28  | 2,887.4 | 1,444.2 | 2,870.4 | 2,869.4 | Q    | 303.2   |         | 286.2   |         | 2   |
| 29  | 3,061.5 | 1,531.3 | 3,044.5 | 3,043.5 | R    | 175.1   |         | 158.1   |         | 1   |

# Whole proteome

| Protein No. | Leading protein name | Sequence            | Mascot Score | Variable Modifications | SILAC State | Charge | m/z       |
|-------------|----------------------|---------------------|--------------|------------------------|-------------|--------|-----------|
| W-127       | splP56378I68MP_HUMAN | MLQSIIKNIWIPMKPYYTK | 26.11        | Unmodified             | Light       | 3      | 789.77043 |

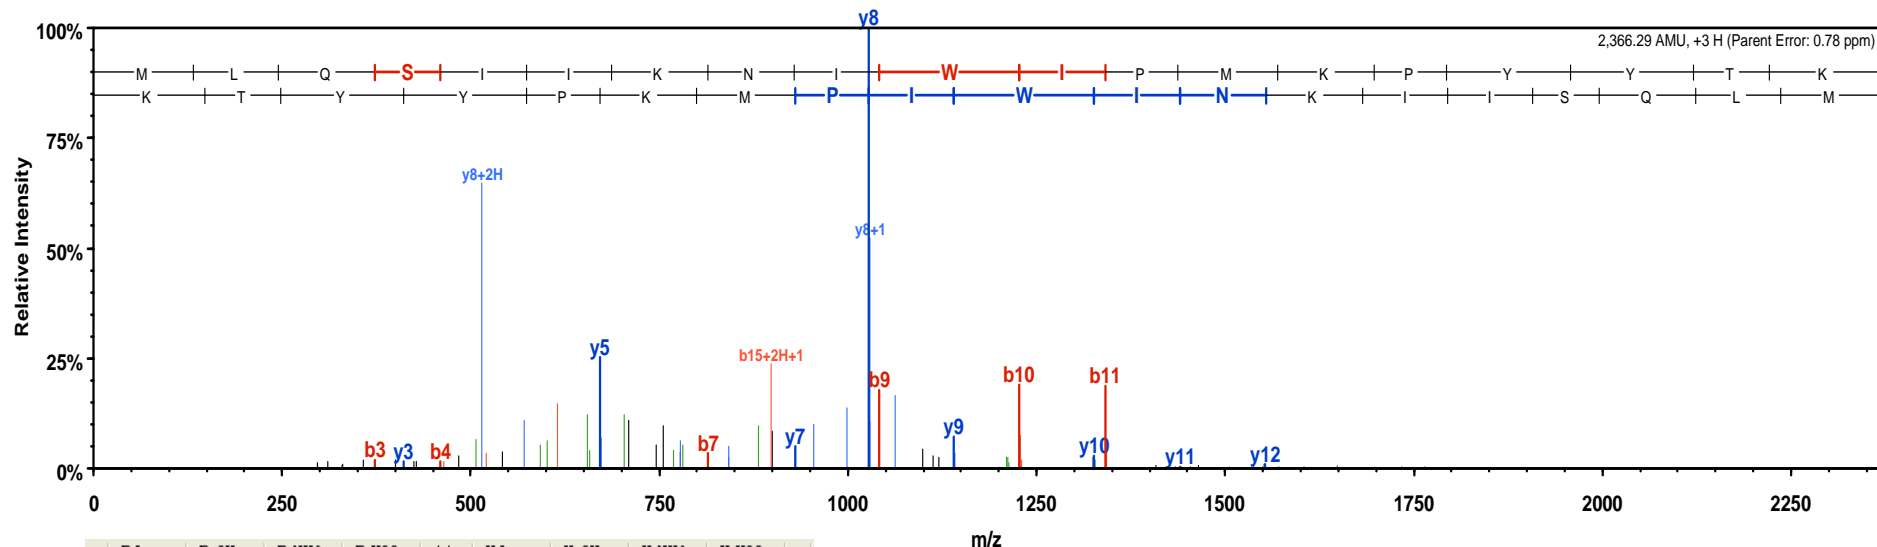

| ... | B Ions  | B+2H    | B-NH3   | B-H2O   | AA | Y Ions  | Y+2H    | Y-NH3   | Y-H2O   | ... |
|-----|---------|---------|---------|---------|----|---------|---------|---------|---------|-----|
| 1   | 132.0   |         |         |         | M  | 2,367.3 | 1,184.2 | 2,350.3 | 2,349.3 | 19  |
| 2   | 245.1   |         |         |         | L  | 2,236.3 | 1,118.6 | 2,219.2 | 2,218.2 | 18  |
| 3   | 373.2   |         | 356.2   |         | Q  | 2,123.2 | 1,062.1 | 2,106.1 | 2,105.2 | 17  |
| 4   | 460.2   |         | 443.2   | 442.2   | S  | 1,995.1 | 998.1   | 1,978.1 | 1,977.1 | 16  |
| 5   | 573.3   |         | 556.3   | 555.3   | I  | 1,908.1 | 954.5   | 1,891.1 | 1,890.1 | 15  |
| 6   | 686.4   | 343.7   | 669.4   | 668.4   | I  | 1,795.0 | 898.0   | 1,778.0 | 1,777.0 | 14  |
| 7   | 814.5   | 407.7   | 797.5   | 796.5   | K  | 1,681.9 | 841.5   | 1,664.9 | 1,663.9 | 13  |
| 8   | 928.5   | 464.8   | 911.5   | 910.5   | N  | 1,553.8 | 777.4   | 1,536.8 | 1,535.8 | 12  |
| 9   | 1,041.6 | 521.3   | 1,024.6 | 1,023.6 | I  | 1,439.8 | 720.4   | 1,422.7 | 1,421.8 | 11  |
| 10  | 1,227.7 | 614.3   | 1,210.7 | 1,209.7 | W  | 1,326.7 | 663.8   | 1,309.7 | 1,308.7 | 10  |
| 11  | 1,340.8 | 670.9   | 1,323.7 | 1,322.8 | I  | 1,140.6 | 570.8   | 1,123.6 | 1,122.6 | 9   |
| 12  | 1,437.8 | 719.4   | 1,420.8 | 1,419.8 | P  | 1,027.5 | 514.3   | 1,010.5 | 1,009.5 | 8   |
| 13  | 1,568.9 | 784.9   | 1,551.8 | 1,550.9 | M  | 930.5   | 465.7   | 913.4   | 912.5   | 7   |
| 14  | 1,697.0 | 849.0   | 1,679.9 | 1,679.0 | K  | 799.4   | 400.2   | 782.4   | 781.4   | 6   |
| 15  | 1,794.0 | 897.5   | 1,777.0 | 1,776.0 | P  | 671.3   |         | 654.3   | 653.3   | 5   |
| 16  | 1,957.1 | 979.0   | 1,940.1 | 1,939.1 | Y  | 574.3   |         | 557.3   | 556.3   | 4   |
| 17  | 2,120.1 | 1,060.6 | 2,103.1 | 2,102.1 | Y  | 411.2   |         | 394.2   | 393.2   | 3   |
| 18  | 2,221.2 | 1,111.1 | 2,204.2 | 2,203.2 | T  | 248.2   |         | 231.1   | 230.1   | 2   |
| 19  | 2,367.3 | 1,184.2 | 2,350.3 | 2,349.3 | K  | 147.1   |         | 130.1   |         | 1   |



# Whole proteome

| Protein No. | Leading protein name  | Sequence         | Mascot Score | Variable Modifications | SILAC State | Charge | m/z       |
|-------------|-----------------------|------------------|--------------|------------------------|-------------|--------|-----------|
| W-128       | splA4D1E1HZ804B_HUMAN | HQEFDNHINSYDHAHK | 25.54        | Unmodified             | Light       | 3      | 664.62962 |

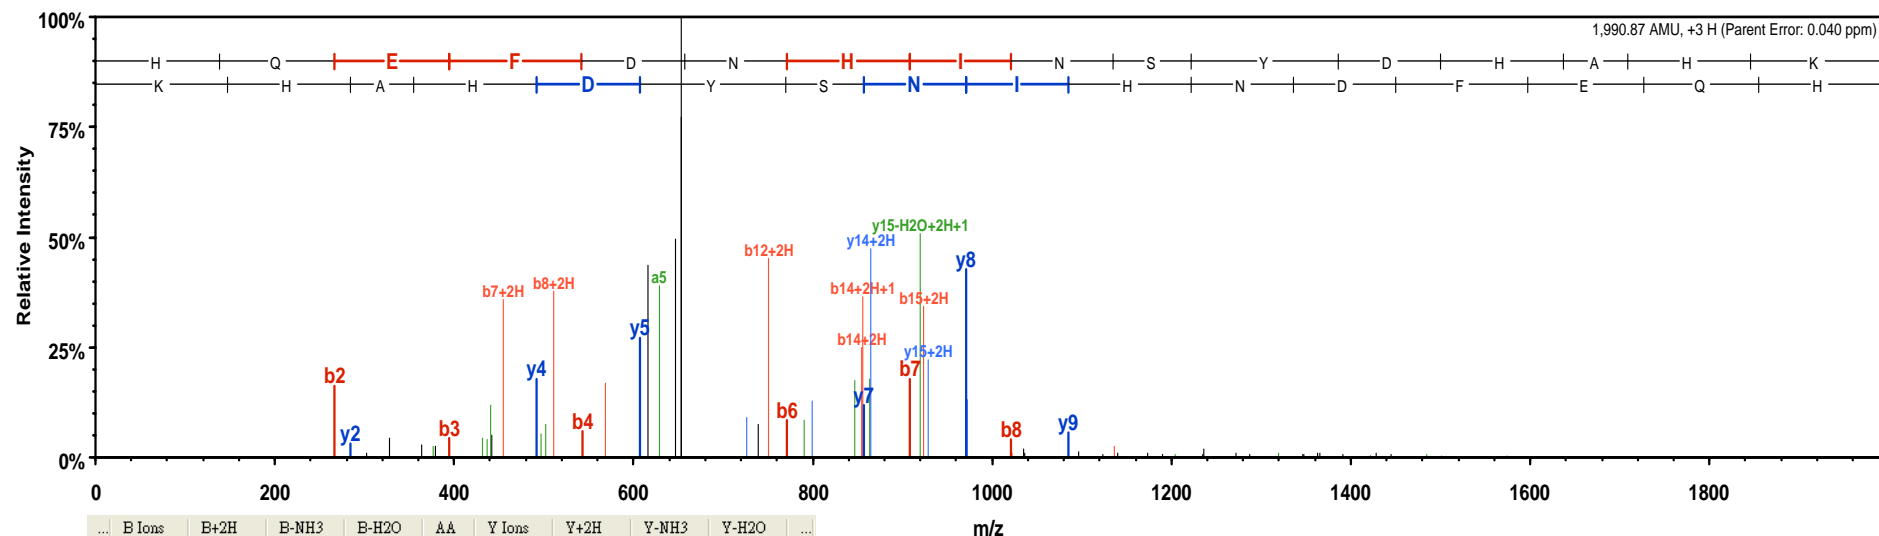

| ... | B Ions  | B+2H  | B-NH3   | B-H2O   | AA | Y Ions  | Y+2H  | Y-NH3   | Y-H2O   | ... |
|-----|---------|-------|---------|---------|----|---------|-------|---------|---------|-----|
| 1   | 138.1   | 69.5  |         |         | H  | 1,991.9 | 996.4 | 1,974.8 | 1,973.9 | 16  |
| 2   | 266.1   | 133.6 | 249.1   |         | Q  | 1,854.8 | 927.9 | 1,837.8 | 1,836.8 | 15  |
| 3   | 395.2   | 198.1 | 378.1   | 377.2   | E  | 1,726.8 | 863.9 | 1,709.7 | 1,708.7 | 14  |
| 4   | 542.2   | 271.6 | 525.2   | 524.2   | F  | 1,597.7 | 799.4 | 1,580.7 | 1,579.7 | 13  |
| 5   | 657.3   | 329.1 | 640.2   | 639.3   | D  | 1,450.6 | 725.8 | 1,433.6 | 1,432.6 | 12  |
| 6   | 771.3   | 386.2 | 754.3   | 753.3   | N  | 1,335.6 | 668.3 | 1,318.6 | 1,317.6 | 11  |
| 7   | 908.4   | 454.7 | 891.3   | 890.4   | H  | 1,221.6 | 611.3 | 1,204.5 | 1,203.6 | 10  |
| 8   | 1,021.4 | 511.2 | 1,004.4 | 1,003.4 | I  | 1,084.5 | 542.8 | 1,067.5 | 1,066.5 | 9   |
| 9   | 1,135.5 | 568.2 | 1,118.5 | 1,117.5 | N  | 971.4   | 486.2 | 954.4   | 953.4   | 8   |
| 10  | 1,222.5 | 611.8 | 1,205.5 | 1,204.5 | S  | 857.4   | 429.2 | 840.4   | 839.4   | 7   |
| 11  | 1,385.6 | 693.3 | 1,368.6 | 1,367.6 | Y  | 770.4   | 385.7 | 753.3   | 752.3   | 6   |
| 12  | 1,500.6 | 750.8 | 1,483.6 | 1,482.6 | D  | 607.3   | 304.2 | 590.3   | 589.3   | 5   |
| 13  | 1,637.7 | 819.3 | 1,620.6 | 1,619.7 | H  | 492.3   | 246.6 | 475.2   |         | 4   |
| 14  | 1,708.7 | 854.9 | 1,691.7 | 1,690.7 | A  | 355.2   | 178.1 | 338.2   |         | 3   |
| 15  | 1,845.8 | 923.4 | 1,828.7 | 1,827.8 | H  | 284.2   | 142.6 | 267.1   |         | 2   |
| 16  | 1,991.9 | 996.4 | 1,974.8 | 1,973.9 | K  | 147.1   |       | 130.1   |         | 1   |

# Whole proteome

| Protein No. | Leading protein name | Sequence                | Mascot Score | Variable Modifications | SILAC State | Charge | m/z       |
|-------------|----------------------|-------------------------|--------------|------------------------|-------------|--------|-----------|
| W-129       | splP51397IDAP1_HUMAN | GDKDFPPAAAQVAHQKPHASMDK | 24.99        | Unmodified             | Light       | 3      | 816.06925 |

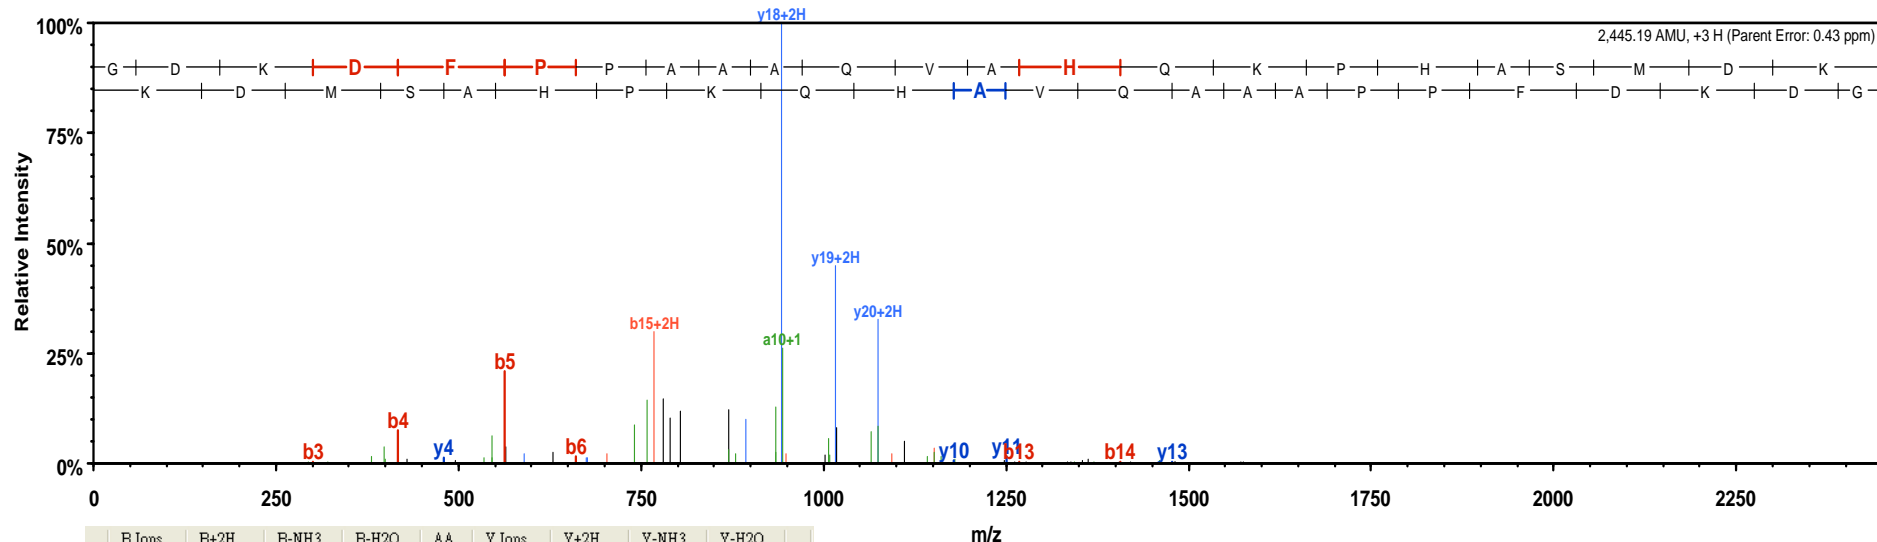

| ... | B Ions  | B+2H    | B-NH3   | B-H2O   | AA | Y Ions  | Y+2H    | Y-NH3   | Y-H2O   | ... |
|-----|---------|---------|---------|---------|----|---------|---------|---------|---------|-----|
| 1   | 58.0    |         |         |         | G  | 2,446.2 | 1,223.6 | 2,429.2 | 2,428.2 | 23  |
| 2   | 173.1   |         |         | 155.0   | D  | 2,389.2 | 1,195.1 | 2,372.1 | 2,371.2 | 22  |
| 3   | 301.2   | 151.1   | 284.1   | 283.1   | K  | 2,274.1 | 1,137.6 | 2,257.1 | 2,256.1 | 21  |
| 4   | 416.2   | 208.6   | 399.2   | 398.2   | D  | 2,146.1 | 1,073.5 | 2,129.0 | 2,128.0 | 20  |
| 5   | 563.2   | 282.1   | 546.2   | 545.2   | F  | 2,031.0 | 1,016.0 | 2,014.0 | 2,013.0 | 19  |
| 6   | 660.3   | 330.7   | 643.3   | 642.3   | P  | 1,884.0 | 942.5   | 1,866.9 | 1,865.9 | 18  |
| 7   | 757.4   | 379.2   | 740.3   | 739.3   | P  | 1,786.9 | 894.0   | 1,769.9 | 1,768.9 | 17  |
| 8   | 828.4   | 414.7   | 811.4   | 810.4   | A  | 1,689.8 | 845.4   | 1,672.8 | 1,671.8 | 16  |
| 9   | 899.4   | 450.2   | 882.4   | 881.4   | A  | 1,618.8 | 809.9   | 1,601.8 | 1,600.8 | 15  |
| 10  | 970.5   | 485.7   | 953.4   | 952.5   | A  | 1,547.8 | 774.4   | 1,530.7 | 1,529.8 | 14  |
| 11  | 1,098.5 | 549.8   | 1,081.5 | 1,080.5 | Q  | 1,476.7 | 738.9   | 1,459.7 | 1,458.7 | 13  |
| 12  | 1,197.6 | 599.3   | 1,180.6 | 1,179.6 | V  | 1,348.7 | 674.8   | 1,331.7 | 1,330.7 | 12  |
| 13  | 1,268.6 | 634.8   | 1,251.6 | 1,250.6 | A  | 1,249.6 | 625.3   | 1,232.6 | 1,231.6 | 11  |
| 14  | 1,405.7 | 703.3   | 1,388.7 | 1,387.7 | H  | 1,178.6 | 589.8   | 1,161.5 | 1,160.6 | 10  |
| 15  | 1,533.7 | 767.4   | 1,516.7 | 1,515.7 | Q  | 1,041.5 | 521.3   | 1,024.5 | 1,023.5 | 9   |
| 16  | 1,661.8 | 831.4   | 1,644.8 | 1,643.8 | K  | 913.5   | 457.2   | 896.4   | 895.4   | 8   |
| 17  | 1,758.9 | 879.9   | 1,741.9 | 1,740.9 | P  | 785.4   | 393.2   | 768.3   | 767.4   | 7   |
| 18  | 1,896.0 | 948.5   | 1,878.9 | 1,877.9 | H  | 688.3   | 344.7   | 671.3   | 670.3   | 6   |
| 19  | 1,967.0 | 984.0   | 1,950.0 | 1,949.0 | A  | 551.2   |         | 534.2   | 533.2   | 5   |
| 20  | 2,054.0 | 1,027.5 | 2,037.0 | 2,036.0 | S  | 480.2   |         | 463.2   | 462.2   | 4   |
| 21  | 2,185.1 | 1,093.0 | 2,168.0 | 2,167.1 | M  | 393.2   |         | 376.2   | 375.2   | 3   |
| 22  | 2,300.1 | 1,150.5 | 2,283.1 | 2,282.1 | D  | 262.1   |         | 245.1   | 244.1   | 2   |
| 23  | 2,446.2 | 1,223.6 | 2,429.2 | 2,428.2 | K  | 147.1   |         | 130.1   |         | 1   |

# Whole proteome

| Protein No. | Leading protein name  | Sequence | Mascot Score | Variable Modifications | SILAC State | Charge | m/z       |
|-------------|-----------------------|----------|--------------|------------------------|-------------|--------|-----------|
| W-130       | splQ00765IREEP5_HUMAN | IIRPFFLK | 23.94        | Unmodified             | Light       | 2      | 517.33149 |

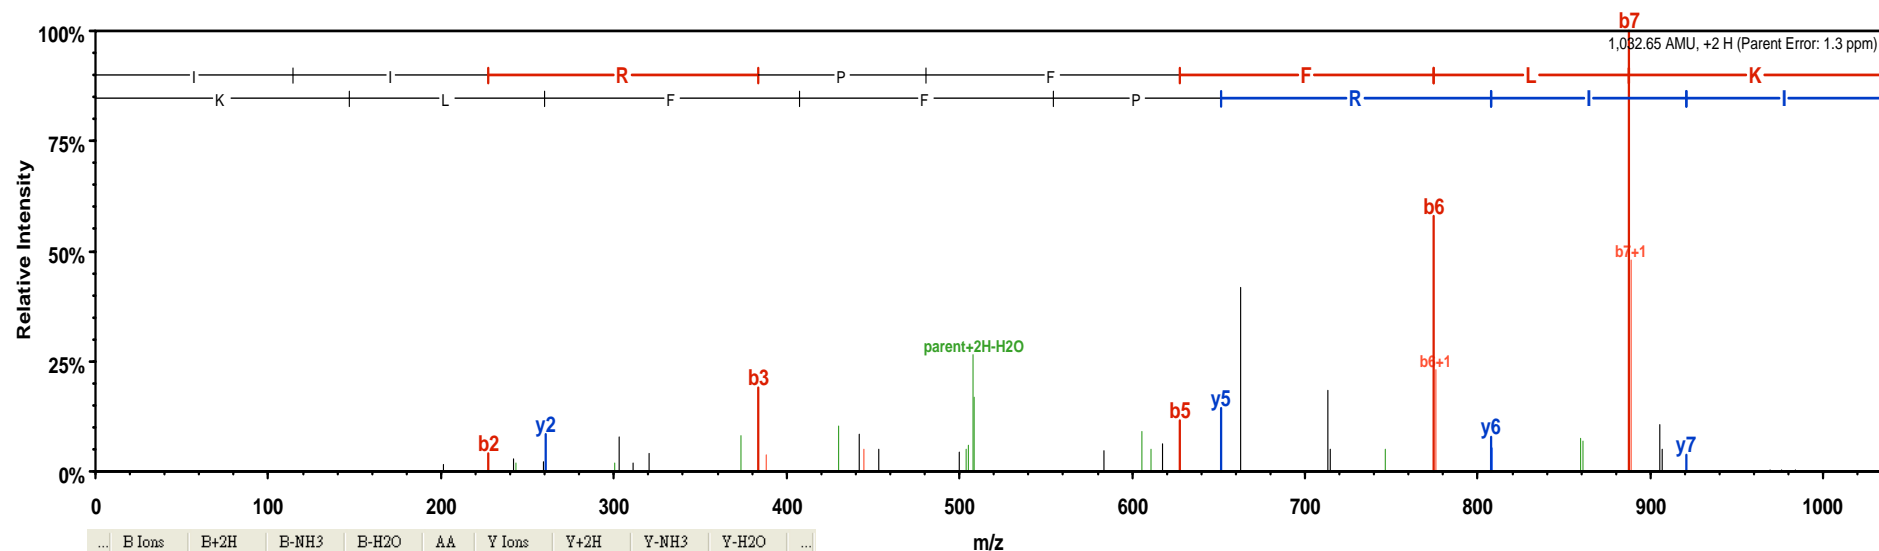

| ... | B Ions  | B+2H  | B-NH3   | B-H2O | AA | Y Ions  | Y+2H  | Y-NH3   | Y-H2O | ... |
|-----|---------|-------|---------|-------|----|---------|-------|---------|-------|-----|
| 1   | 114.1   |       |         |       | I  | 1,033.7 | 517.3 | 1,016.6 |       | 8   |
| 2   | 227.2   |       |         |       | I  | 920.6   | 460.8 | 903.5   |       | 7   |
| 3   | 383.3   | 192.1 | 366.3   |       | R  | 807.5   | 404.2 | 790.5   |       | 6   |
| 4   | 480.3   | 240.7 | 463.3   |       | P  | 651.4   |       | 634.4   |       | 5   |
| 5   | 627.4   | 314.2 | 610.4   |       | F  | 554.3   |       | 537.3   |       | 4   |
| 6   | 774.5   | 387.7 | 757.4   |       | F  | 407.3   |       | 390.2   |       | 3   |
| 7   | 887.6   | 444.3 | 870.5   |       | L  | 260.2   |       | 243.2   |       | 2   |
| 8   | 1,033.7 | 517.3 | 1,016.6 |       | K  | 147.1   |       | 130.1   |       | 1   |

# Whole proteome

| Protein No. | Leading protein name  | Sequence           | Mascot Score | Variable Modifications | SILAC State | Charge | m/z       |
|-------------|-----------------------|--------------------|--------------|------------------------|-------------|--------|-----------|
| W-131       | splO95182INDUA7_HUMAN | ALVSGKPAESSAVAATEK | 23.34        | Unmodified             | Light       | 3      | 572.64399 |

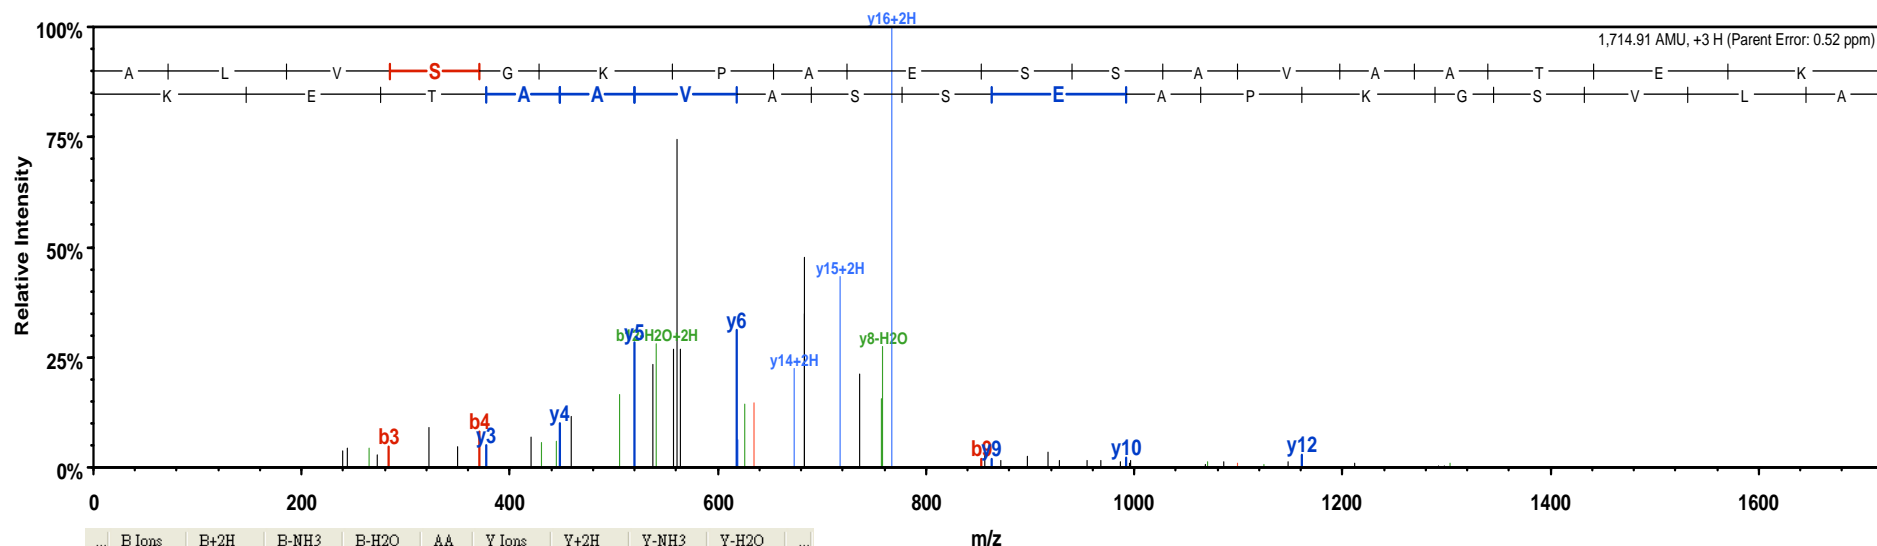

| ... | B Ions  | B+2H  | B-NH3   | B-H2O   | AA | Y Ions  | Y+2H  | Y-NH3   | Y-H2O   | ... |
|-----|---------|-------|---------|---------|----|---------|-------|---------|---------|-----|
| 1   | 72.0    |       |         |         | A  | 1,715.9 | 858.5 | 1,698.9 | 1,697.9 | 18  |
| 2   | 185.1   |       |         |         | L  | 1,644.9 | 822.9 | 1,627.9 | 1,626.9 | 17  |
| 3   | 284.2   |       |         |         | V  | 1,531.8 | 766.4 | 1,514.8 | 1,513.8 | 16  |
| 4   | 371.2   |       |         | 353.2   | S  | 1,432.7 | 716.9 | 1,415.7 | 1,414.7 | 15  |
| 5   | 428.3   |       |         | 410.2   | G  | 1,345.7 | 673.4 | 1,328.7 | 1,327.7 | 14  |
| 6   | 556.3   | 278.7 | 539.3   | 538.3   | K  | 1,288.7 | 644.8 | 1,271.6 | 1,270.7 | 13  |
| 7   | 653.4   | 327.2 | 636.4   | 635.4   | P  | 1,160.6 | 580.8 | 1,143.6 | 1,142.6 | 12  |
| 8   | 724.4   | 362.7 | 707.4   | 706.4   | A  | 1,063.5 | 532.3 | 1,046.5 | 1,045.5 | 11  |
| 9   | 853.5   | 427.2 | 836.5   | 835.5   | E  | 992.5   | 496.7 | 975.5   | 974.5   | 10  |
| 10  | 940.5   | 470.8 | 923.5   | 922.5   | S  | 863.4   | 432.2 | 846.4   | 845.4   | 9   |
| 11  | 1,027.5 | 514.3 | 1,010.5 | 1,009.5 | S  | 776.4   | 388.7 | 759.4   | 758.4   | 8   |
| 12  | 1,098.6 | 549.8 | 1,081.6 | 1,080.6 | A  | 689.4   | 345.2 | 672.4   | 671.4   | 7   |
| 13  | 1,197.6 | 599.3 | 1,180.6 | 1,179.6 | V  | 618.3   | 309.7 | 601.3   | 600.3   | 6   |
| 14  | 1,268.7 | 634.8 | 1,251.7 | 1,250.7 | A  | 519.3   |       | 502.3   | 501.3   | 5   |
| 15  | 1,339.7 | 670.4 | 1,322.7 | 1,321.7 | A  | 448.2   |       | 431.2   | 430.2   | 4   |
| 16  | 1,440.8 | 720.9 | 1,423.7 | 1,422.8 | T  | 377.2   |       | 360.2   | 359.2   | 3   |
| 17  | 1,569.8 | 785.4 | 1,552.8 | 1,551.8 | E  | 276.2   |       | 259.1   | 258.1   | 2   |
| 18  | 1,715.9 | 858.5 | 1,698.9 | 1,697.9 | K  | 147.1   |       | 130.1   |         | 1   |

# Whole proteome

| Protein No. | Leading protein name  | Sequence                  | Mascot Score | Variable Modifications | SILAC State | Charge | m/z       |
|-------------|-----------------------|---------------------------|--------------|------------------------|-------------|--------|-----------|
| W-132       | splQ99757 THIOM_HUMAN | VDIDDHTDLAIEYEVSAVPTVLAMK | 19.46        | Unmodified             | Heavy       | 3      | 915.46148 |

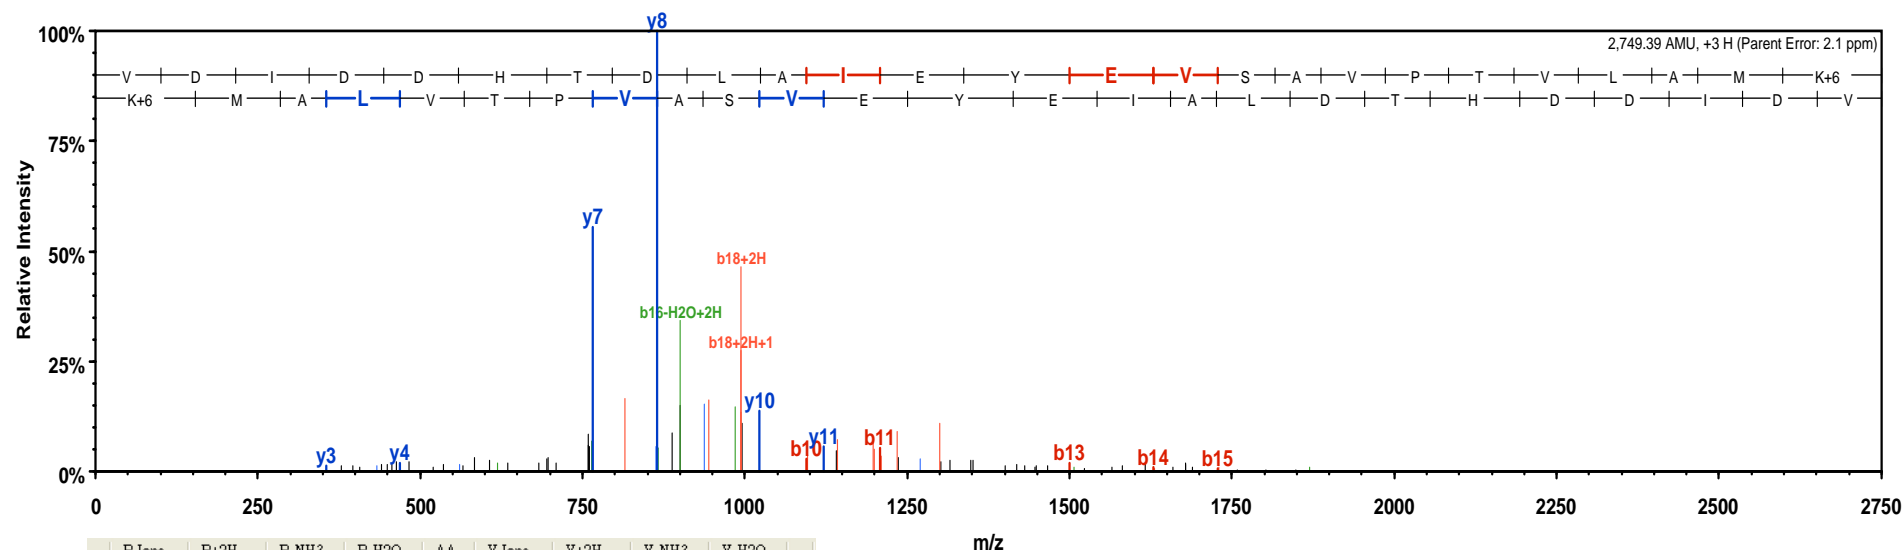

| ... | E Ions  | B+2H    | B-NH3   | B-H2O   | AA  | Y Ions  | Y+2H    | Y-NH3   | Y-H2O   | ... |
|-----|---------|---------|---------|---------|-----|---------|---------|---------|---------|-----|
| 1   | 100.1   |         |         |         | V   | 2,750.4 | 1,375.7 | 2,733.4 | 2,732.4 | 25  |
| 2   | 215.1   |         |         | 197.1   | D   | 2,651.3 | 1,326.2 | 2,634.3 | 2,633.3 | 24  |
| 3   | 328.2   |         |         | 310.2   | I   | 2,536.3 | 1,268.7 | 2,519.3 | 2,518.3 | 23  |
| 4   | 443.2   |         |         | 425.2   | D   | 2,423.2 | 1,212.1 | 2,406.2 | 2,405.2 | 22  |
| 5   | 558.2   |         |         | 540.2   | D   | 2,308.2 | 1,154.6 | 2,291.2 | 2,290.2 | 21  |
| 6   | 695.3   | 348.2   |         | 677.3   | H   | 2,193.2 | 1,097.1 | 2,176.1 | 2,175.1 | 20  |
| 7   | 796.3   | 398.7   |         | 778.3   | T   | 2,056.1 | 1,028.6 | 2,039.1 | 2,038.1 | 19  |
| 8   | 911.4   | 456.2   |         | 893.4   | D   | 1,955.1 | 978.0   | 1,938.0 | 1,937.0 | 18  |
| 9   | 1,024.5 | 512.7   |         | 1,006.4 | L   | 1,840.0 | 920.5   | 1,823.0 | 1,822.0 | 17  |
| 10  | 1,095.5 | 548.3   |         | 1,077.5 | A   | 1,726.9 | 864.0   | 1,709.9 | 1,708.9 | 16  |
| 11  | 1,208.6 | 604.8   |         | 1,190.6 | I   | 1,655.9 | 828.5   | 1,638.9 | 1,637.9 | 15  |
| 12  | 1,337.6 | 669.3   |         | 1,319.6 | E   | 1,542.8 | 771.9   | 1,525.8 | 1,524.8 | 14  |
| 13  | 1,500.7 | 750.8   |         | 1,482.7 | Y   | 1,413.8 | 707.4   | 1,396.7 | 1,395.8 | 13  |
| 14  | 1,629.7 | 815.4   |         | 1,611.7 | E   | 1,250.7 | 625.9   | 1,233.7 | 1,232.7 | 12  |
| 15  | 1,728.8 | 864.9   |         | 1,710.8 | V   | 1,121.7 | 561.3   | 1,104.6 | 1,103.7 | 11  |
| 16  | 1,815.8 | 908.4   |         | 1,797.8 | S   | 1,022.6 | 511.8   | 1,005.6 | 1,004.6 | 10  |
| 17  | 1,886.9 | 943.9   |         | 1,868.9 | A   | 935.6   | 468.3   | 918.5   | 917.6   | 9   |
| 18  | 1,985.9 | 993.5   |         | 1,967.9 | V   | 864.5   | 432.8   | 847.5   | 846.5   | 8   |
| 19  | 2,083.0 | 1,042.0 |         | 2,065.0 | P   | 785.5   | 383.2   | 748.4   | 747.5   | 7   |
| 20  | 2,184.0 | 1,092.5 |         | 2,166.0 | T   | 668.4   | 334.7   | 651.4   | 650.4   | 6   |
| 21  | 2,283.1 | 1,142.1 |         | 2,265.1 | V   | 567.4   |         | 550.3   |         | 5   |
| 22  | 2,396.2 | 1,198.6 |         | 2,378.2 | L   | 468.3   |         | 451.3   |         | 4   |
| 23  | 2,467.2 | 1,234.1 |         | 2,449.2 | A   | 355.2   |         | 338.2   |         | 3   |
| 24  | 2,598.3 | 1,299.6 |         | 2,580.3 | M   | 284.2   |         | 267.1   |         | 2   |
| 25  | 2,750.4 | 1,375.7 | 2,733.4 | 2,732.4 | K+6 | 153.1   |         | 136.1   |         | 1   |

# Whole proteome

| Protein No. | Leading protein name  | Sequence              | Mascot Score | Variable Modifications | SILAC State | Charge | m/z       |
|-------------|-----------------------|-----------------------|--------------|------------------------|-------------|--------|-----------|
| W-133       | splQ13439 GOGA4_HUMAN | AQEVEAELLESHQEETNQLLK | 17.25        | Unmodified             | Heavy       | 2      | 1219.6059 |

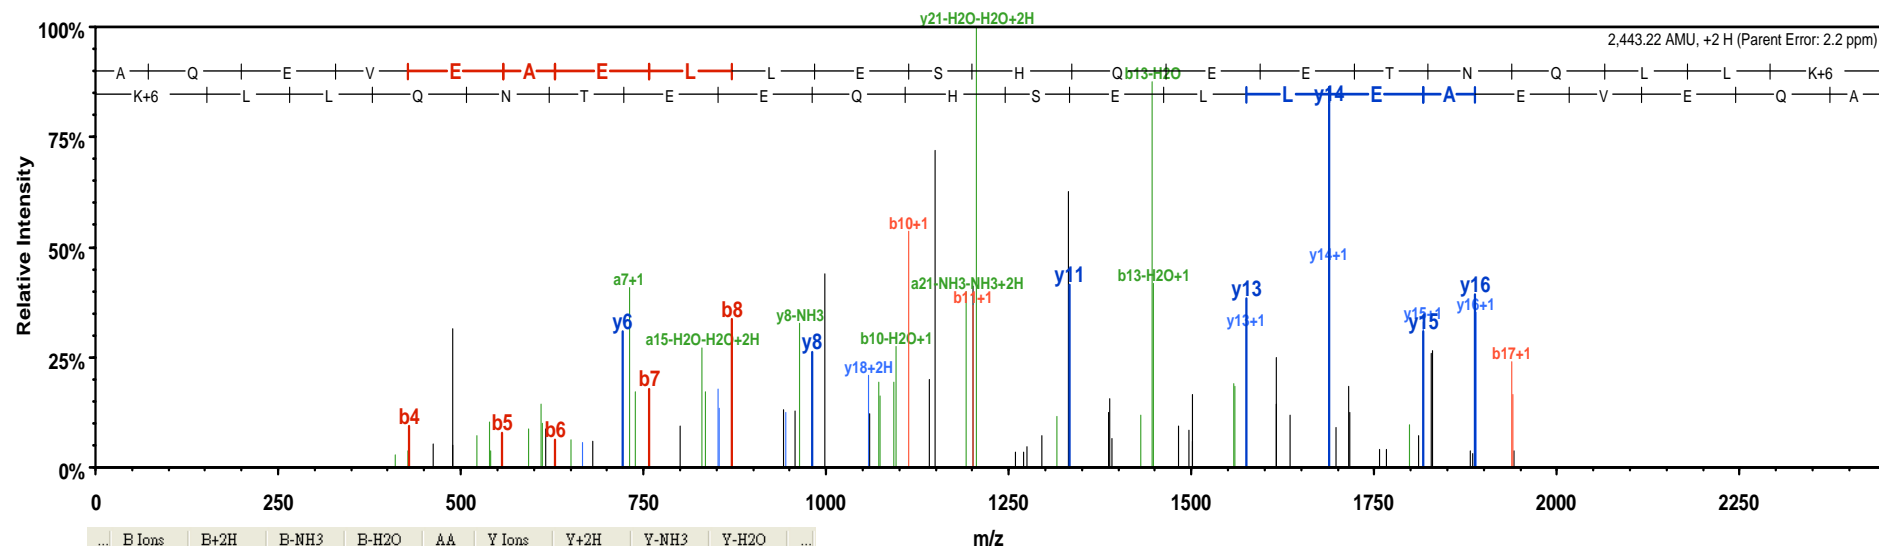

| ... | B Ions  | B+2H    | B-NH3   | B-H2O   | AA  | Y Ions  | Y+2H    | Y-NH3   | Y-H2O   | ... |
|-----|---------|---------|---------|---------|-----|---------|---------|---------|---------|-----|
| 1   | 72.0    |         |         |         | A   | 2,444.2 | 1,222.6 | 2,427.2 | 2,426.2 | 21  |
| 2   | 200.1   |         | 183.1   |         | Q   | 2,373.2 | 1,187.1 | 2,356.2 | 2,355.2 | 20  |
| 3   | 329.1   |         | 312.1   | 311.1   | E   | 2,245.1 | 1,123.1 | 2,228.1 | 2,227.1 | 19  |
| 4   | 428.2   |         | 411.2   | 410.2   | V   | 2,116.1 | 1,058.5 | 2,099.1 | 2,098.1 | 18  |
| 5   | 557.3   |         | 540.2   | 539.2   | E   | 2,017.0 | 1,009.0 | 2,000.0 | 1,999.0 | 17  |
| 6   | 628.3   | 314.7   | 611.3   | 610.3   | A   | 1,888.0 | 944.5   | 1,870.9 | 1,870.0 | 16  |
| 7   | 757.3   | 379.2   | 740.3   | 739.3   | E   | 1,816.9 | 909.0   | 1,799.9 | 1,798.9 | 15  |
| 8   | 870.4   | 435.7   | 853.4   | 852.4   | L   | 1,687.9 | 844.5   | 1,670.9 | 1,669.9 | 14  |
| 9   | 983.5   | 492.3   | 966.5   | 965.5   | L   | 1,574.8 | 787.9   | 1,557.8 | 1,556.8 | 13  |
| 10  | 1,112.5 | 556.8   | 1,095.5 | 1,094.5 | E   | 1,461.7 | 731.4   | 1,444.7 | 1,443.7 | 12  |
| 11  | 1,199.6 | 600.3   | 1,182.6 | 1,181.6 | S   | 1,332.7 | 666.8   | 1,315.7 | 1,314.7 | 11  |
| 12  | 1,336.6 | 668.8   | 1,319.6 | 1,318.6 | H   | 1,245.7 | 623.3   | 1,228.6 | 1,227.6 | 10  |
| 13  | 1,464.7 | 732.9   | 1,447.7 | 1,446.7 | Q   | 1,108.6 | 554.8   | 1,091.6 | 1,090.6 | 9   |
| 14  | 1,593.7 | 797.4   | 1,576.7 | 1,575.7 | E   | 980.5   | 490.8   | 963.5   | 962.5   | 8   |
| 15  | 1,722.8 | 861.9   | 1,705.8 | 1,704.8 | E   | 851.5   | 426.3   | 834.5   | 833.5   | 7   |
| 16  | 1,823.8 | 912.4   | 1,806.8 | 1,805.8 | T   | 722.5   | 361.7   | 705.4   | 704.4   | 6   |
| 17  | 1,937.9 | 969.4   | 1,920.8 | 1,919.9 | N   | 621.4   |         | 604.4   |         | 5   |
| 18  | 2,065.9 | 1,033.5 | 2,048.9 | 2,047.9 | Q   | 507.4   |         | 490.3   |         | 4   |
| 19  | 2,179.0 | 1,090.0 | 2,162.0 | 2,161.0 | L   | 379.3   |         | 362.3   |         | 3   |
| 20  | 2,292.1 | 1,146.6 | 2,275.1 | 2,274.1 | L   | 266.2   |         | 249.2   |         | 2   |
| 21  | 2,444.2 | 1,222.6 | 2,427.2 | 2,426.2 | K+6 | 153.1   |         | 136.1   |         | 1   |

# Whole proteome

| Protein No. | Leading protein name | Sequence         | Mascot Score | Variable Modifications | SILAC State | Charge | m/z       |
|-------------|----------------------|------------------|--------------|------------------------|-------------|--------|-----------|
| W-134       | spIP103211IC07_HUMAN | THVTHHPLSDHEATLR | 12.61        | Unmodified             |             | 3      | 617.64672 |

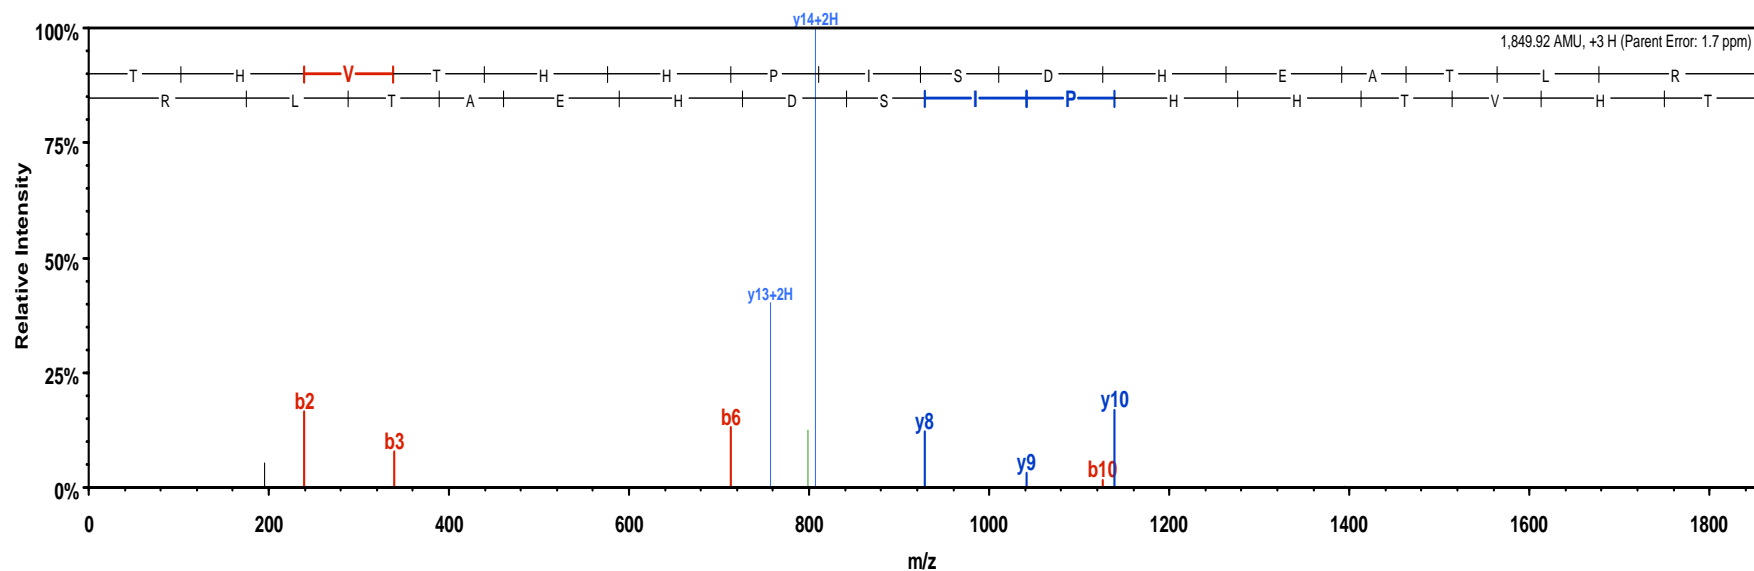

| ... | B Ions  | B+2H  | B-NH3   | B-H2O   | AA | Y Ions  | Y+2H  | Y-NH3   | Y-H2O   | ... |
|-----|---------|-------|---------|---------|----|---------|-------|---------|---------|-----|
| 1   | 102.1   |       |         | 84.0    | T  | 1,850.9 | 926.0 | 1,833.9 | 1,832.9 | 16  |
| 2   | 239.1   | 120.1 |         | 221.1   | H  | 1,749.9 | 875.4 | 1,732.9 | 1,731.9 | 15  |
| 3   | 338.2   | 169.6 |         | 320.2   | V  | 1,612.8 | 806.9 | 1,595.8 | 1,594.8 | 14  |
| 4   | 439.2   | 220.1 |         | 421.2   | T  | 1,513.8 | 757.4 | 1,496.7 | 1,495.7 | 13  |
| 5   | 576.3   | 288.6 |         | 558.3   | H  | 1,412.7 | 706.9 | 1,395.7 | 1,394.7 | 12  |
| 6   | 713.3   | 357.2 |         | 695.3   | H  | 1,275.6 | 638.3 | 1,258.6 | 1,257.6 | 11  |
| 7   | 810.4   | 405.7 |         | 792.4   | P  | 1,138.6 | 569.8 | 1,121.6 | 1,120.6 | 10  |
| 8   | 923.5   | 462.2 |         | 905.5   | I  | 1,041.5 | 521.3 | 1,024.5 | 1,023.5 | 9   |
| 9   | 1,010.5 | 505.8 |         | 992.5   | S  | 928.4   | 464.7 | 911.4   | 910.4   | 8   |
| 10  | 1,125.5 | 563.3 |         | 1,107.5 | D  | 841.4   | 421.2 | 824.4   | 823.4   | 7   |
| 11  | 1,262.6 | 631.8 |         | 1,244.6 | H  | 726.4   | 363.7 | 709.4   | 708.4   | 6   |
| 12  | 1,391.6 | 696.3 |         | 1,373.6 | E  | 589.3   |       | 572.3   | 571.3   | 5   |
| 13  | 1,462.7 | 731.8 |         | 1,444.7 | A  | 460.3   |       | 443.3   | 442.3   | 4   |
| 14  | 1,563.7 | 782.4 |         | 1,545.7 | T  | 389.3   |       | 372.2   | 371.2   | 3   |
| 15  | 1,676.8 | 838.9 |         | 1,658.8 | L  | 288.2   |       | 271.2   |         | 2   |
| 16  | 1,850.9 | 926.0 | 1,833.9 | 1,832.9 | R  | 175.1   |       | 158.1   |         | 1   |

# Whole proteome

| Protein No. | Leading protein name  | Sequence         | Mascot Score | Variable Modifications | SILAC State | Charge | m/z       |
|-------------|-----------------------|------------------|--------------|------------------------|-------------|--------|-----------|
| W-135       | sp Q8WZ42 TITIN_HUMAN | DSVSITWEPLLDGGSK | 11.33        | Unmodified             | Light       | 2      | 900.95435 |

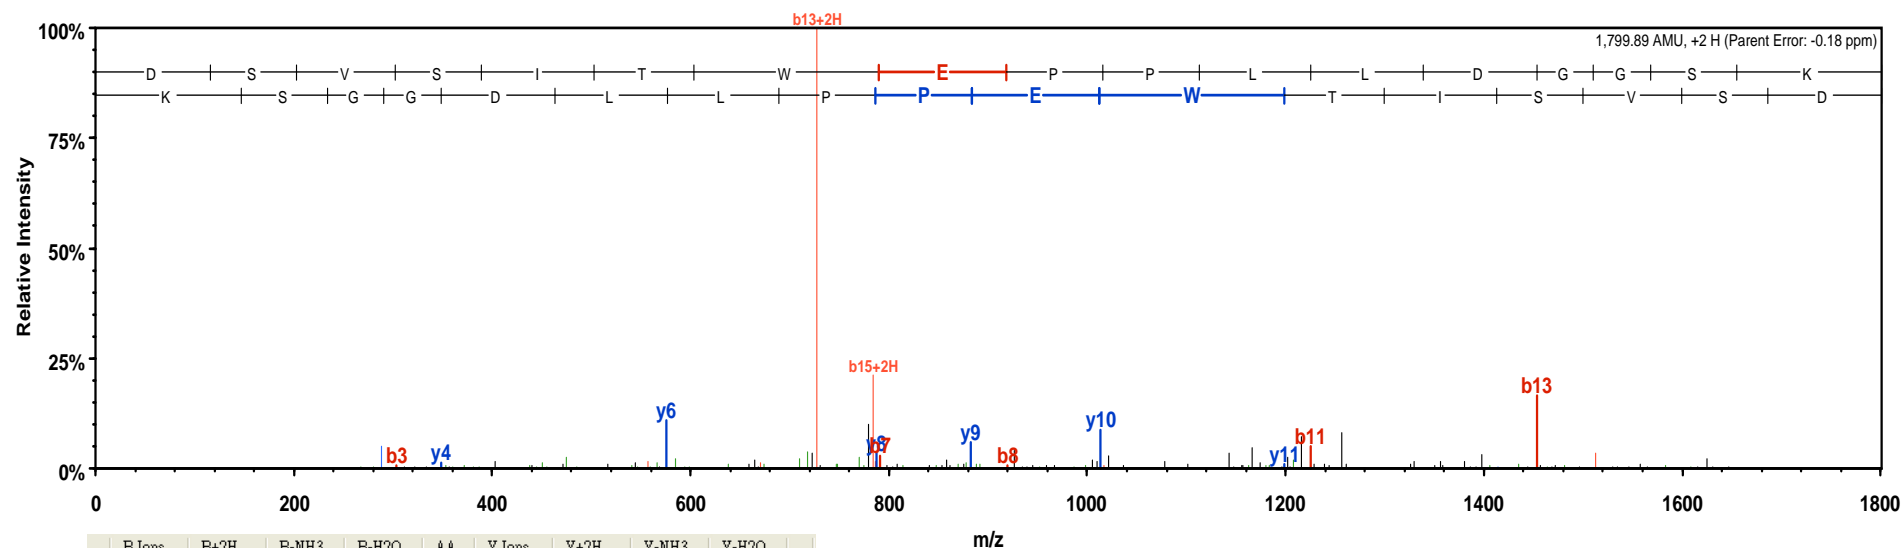

| ... | E Ions  | B+2H  | B-NH3   | B-H2O   | AA | Y Ions  | Y+2H  | Y-NH3   | Y-H2O   | ... |
|-----|---------|-------|---------|---------|----|---------|-------|---------|---------|-----|
| 1   | 116.0   |       |         | 98.0    | D  | 1,800.9 | 901.0 | 1,783.9 | 1,782.9 | 17  |
| 2   | 203.1   |       |         | 185.1   | S  | 1,685.9 | 843.4 | 1,668.8 | 1,667.9 | 16  |
| 3   | 302.1   |       |         | 284.1   | V  | 1,598.8 | 799.9 | 1,581.8 | 1,580.8 | 15  |
| 4   | 389.2   |       |         | 371.2   | S  | 1,499.8 | 750.4 | 1,482.7 | 1,481.8 | 14  |
| 5   | 502.3   |       |         | 484.2   | I  | 1,412.7 | 706.9 | 1,395.7 | 1,394.7 | 13  |
| 6   | 603.3   | 302.2 |         | 585.3   | T  | 1,299.7 | 650.3 | 1,282.6 | 1,281.6 | 12  |
| 7   | 789.4   | 395.2 |         | 771.4   | W  | 1,198.6 | 599.8 | 1,181.6 | 1,180.6 | 11  |
| 8   | 918.4   | 459.7 |         | 900.4   | E  | 1,012.5 | 506.8 | 995.5   | 994.5   | 10  |
| 9   | 1,015.5 | 508.2 |         | 997.5   | P  | 883.5   | 442.2 | 866.5   | 865.5   | 9   |
| 10  | 1,112.5 | 556.8 |         | 1,094.5 | P  | 786.4   | 393.7 | 769.4   | 768.4   | 8   |
| 11  | 1,225.6 | 613.3 |         | 1,207.6 | L  | 689.4   | 345.2 | 672.4   | 671.4   | 7   |
| 12  | 1,338.7 | 669.9 |         | 1,320.7 | L  | 576.3   | 288.7 | 559.3   | 558.3   | 6   |
| 13  | 1,453.7 | 727.4 |         | 1,435.7 | D  | 463.2   |       | 446.2   | 445.2   | 5   |
| 14  | 1,510.7 | 755.9 |         | 1,492.7 | G  | 348.2   |       | 331.2   | 330.2   | 4   |
| 15  | 1,567.8 | 784.4 |         | 1,549.8 | G  | 291.2   |       | 274.1   | 273.2   | 3   |
| 16  | 1,654.8 | 827.9 |         | 1,636.8 | S  | 234.1   |       | 217.1   | 216.1   | 2   |
| 17  | 1,800.9 | 901.0 | 1,783.9 | 1,782.9 | K  | 147.1   |       | 130.1   |         | 1   |



# Whole proteome

| Protein No. | Leading protein name | Sequence                 | Mascot Score | Variable Modifications   | SILAC State | Charge | m/z      |
|-------------|----------------------|--------------------------|--------------|--------------------------|-------------|--------|----------|
| W-136       | splP16591IFER_HUMAN  | QLVKFSLDAAAGMLYLESKNCIHR | 5.55         | Gln->pyro-Glu (N-term Q) | Light       | 2      | 1374.204 |

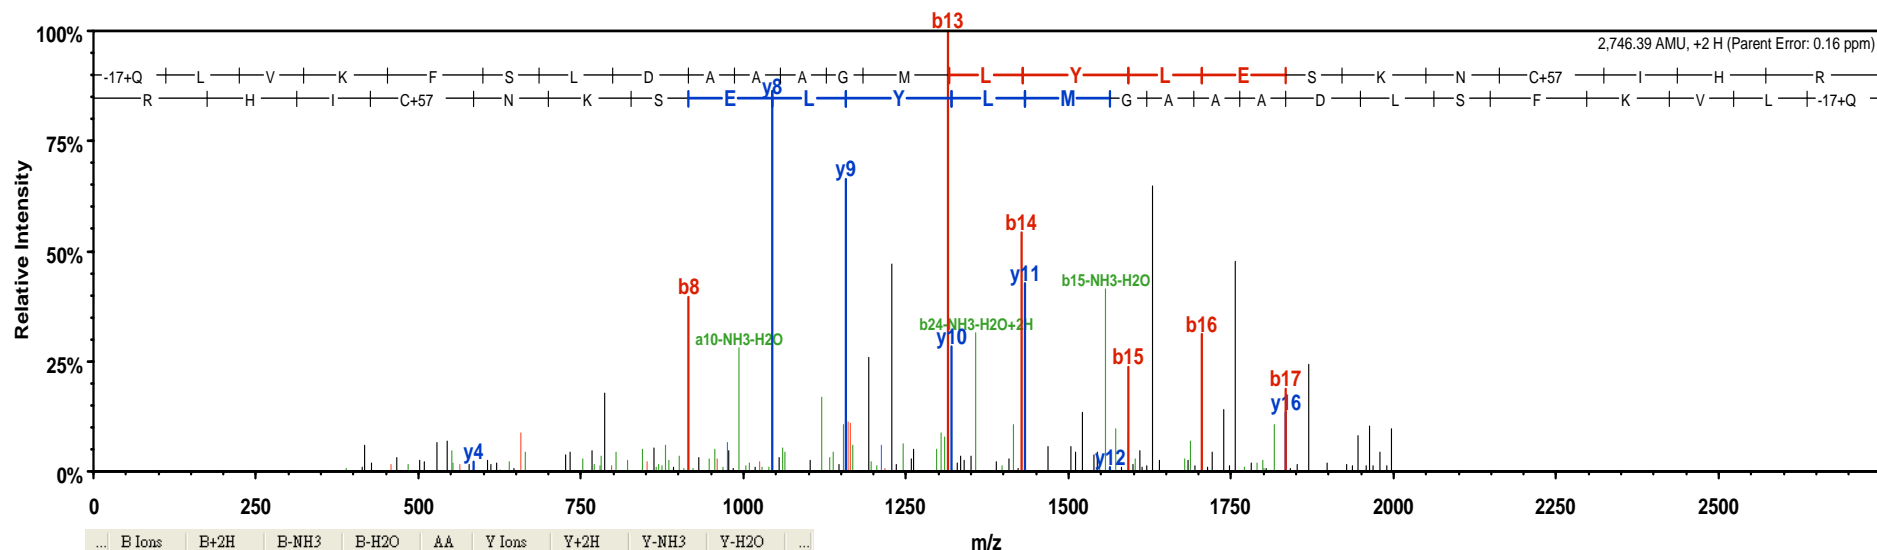

| ... | B Ions  | B+2H    | B-NH3   | B-H2O   | AA   | Y Ions  | Y+2H    | Y-NH3   | Y-H2O   | ... |
|-----|---------|---------|---------|---------|------|---------|---------|---------|---------|-----|
| 1   | 112.0   |         | 95.0    |         | Q-17 | 2,747.4 | 1,374.2 | 2,730.4 | 2,729.4 | 24  |
| 2   | 225.1   |         | 208.1   |         | L    | 2,636.4 | 1,318.7 | 2,619.3 | 2,618.4 | 23  |
| 3   | 324.2   |         | 307.2   |         | V    | 2,523.3 | 1,262.1 | 2,506.3 | 2,505.3 | 22  |
| 4   | 452.3   | 226.6   | 435.3   |         | K    | 2,424.2 | 1,212.6 | 2,407.2 | 2,406.2 | 21  |
| 5   | 599.4   | 300.2   | 582.3   |         | F    | 2,296.1 | 1,148.6 | 2,279.1 | 2,278.1 | 20  |
| 6   | 686.4   | 343.7   | 669.4   | 668.4   | S    | 2,149.1 | 1,075.0 | 2,132.0 | 2,131.0 | 19  |
| 7   | 799.5   | 400.2   | 782.4   | 781.5   | L    | 2,062.0 | 1,031.5 | 2,045.0 | 2,044.0 | 18  |
| 8   | 914.5   | 457.8   | 897.5   | 896.5   | D    | 1,948.9 | 975.0   | 1,931.9 | 1,930.9 | 17  |
| 9   | 985.5   | 493.3   | 968.5   | 967.5   | A    | 1,833.9 | 917.5   | 1,816.9 | 1,815.9 | 16  |
| 10  | 1,056.6 | 528.8   | 1,039.5 | 1,038.6 | A    | 1,762.9 | 881.9   | 1,745.8 | 1,744.9 | 15  |
| 11  | 1,127.6 | 564.3   | 1,110.6 | 1,109.6 | A    | 1,691.8 | 846.4   | 1,674.8 | 1,673.8 | 14  |
| 12  | 1,184.6 | 592.8   | 1,167.6 | 1,166.6 | G    | 1,620.8 | 810.9   | 1,603.8 | 1,602.8 | 13  |
| 13  | 1,315.7 | 658.3   | 1,298.6 | 1,297.7 | M    | 1,563.8 | 782.4   | 1,546.8 | 1,545.8 | 12  |
| 14  | 1,428.8 | 714.9   | 1,411.7 | 1,410.7 | L    | 1,432.7 | 716.9   | 1,415.7 | 1,414.7 | 11  |
| 15  | 1,591.8 | 796.4   | 1,574.8 | 1,573.8 | V    | 1,319.7 | 660.3   | 1,302.6 | 1,301.6 | 10  |
| 16  | 1,704.9 | 853.0   | 1,687.9 | 1,686.9 | L    | 1,156.6 | 578.8   | 1,139.6 | 1,138.6 | 9   |
| 17  | 1,833.9 | 917.5   | 1,816.9 | 1,815.9 | E    | 1,043.5 | 522.3   | 1,026.5 | 1,025.5 | 8   |
| 18  | 1,921.0 | 961.0   | 1,904.0 | 1,903.0 | S    | 914.5   | 457.7   | 897.4   | 896.5   | 7   |
| 19  | 2,049.1 | 1,025.0 | 2,032.0 | 2,031.1 | K    | 827.4   | 414.2   | 810.4   |         | 6   |
| 20  | 2,163.1 | 1,082.1 | 2,146.1 | 2,145.1 | N    | 699.3   | 350.2   | 682.3   |         | 5   |
| 21  | 2,323.1 | 1,162.1 | 2,306.1 | 2,305.1 | C+57 | 585.3   | 293.1   | 568.3   |         | 4   |
| 22  | 2,436.2 | 1,218.6 | 2,419.2 | 2,418.2 | I    | 425.3   | 213.1   | 408.2   |         | 3   |
| 23  | 2,573.3 | 1,287.1 | 2,556.3 | 2,555.3 | H    | 312.2   | 156.6   | 295.2   |         | 2   |
| 24  | 2,747.4 | 1,374.2 | 2,730.4 | 2,729.4 | R    | 175.1   |         | 158.1   |         | 1   |

# Nuclear proteome

| Protein No. | Leading protein name | Sequence              | Mascot Score | Variable Modifications | SILAC State | Charge | m/z       |
|-------------|----------------------|-----------------------|--------------|------------------------|-------------|--------|-----------|
| N-1         | sp Q6W2J9 BCOR_HUMAN | TDVLCADDEEEDCQAASLLQK | 137.51       | Unmodified             | Light       | 2      | 1148.0094 |

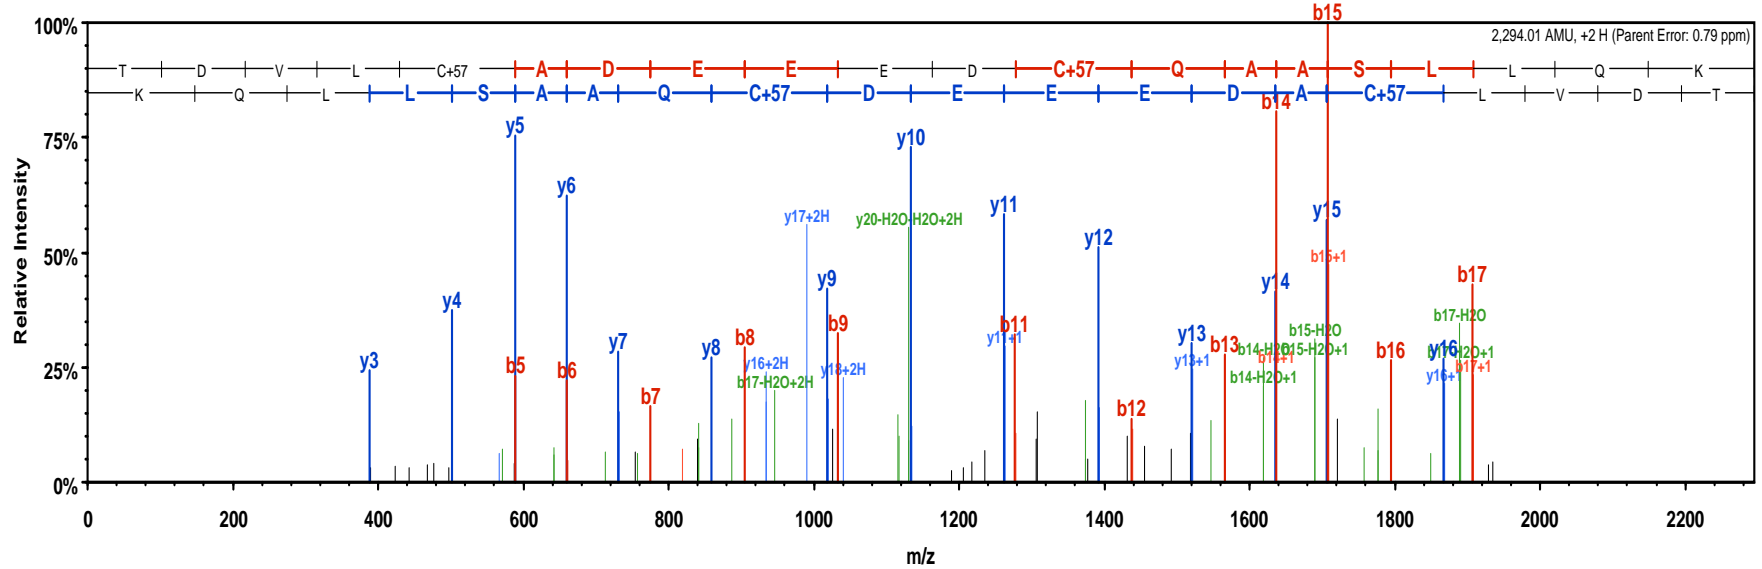

| ... | B Ions  | B+2H    | B-NH3   | B-H2O   | AA   | Y Ions  | Y+2H    | Y-NH3   | Y-H2O   | ... |
|-----|---------|---------|---------|---------|------|---------|---------|---------|---------|-----|
| 1   | 102.1   |         |         | 84.0    | T    | 2,295.0 | 1,148.0 | 2,278.0 | 2,277.0 | 20  |
| 2   | 217.1   |         |         | 199.1   | D    | 2,194.0 | 1,097.5 | 2,176.9 | 2,176.0 | 19  |
| 3   | 316.2   |         |         | 298.1   | V    | 2,078.9 | 1,040.0 | 2,061.9 | 2,060.9 | 18  |
| 4   | 429.2   |         |         | 411.2   | L    | 1,979.9 | 990.4   | 1,962.8 | 1,961.9 | 17  |
| 5   | 589.3   |         |         | 571.3   | C+57 | 1,866.8 | 933.9   | 1,849.8 | 1,848.8 | 16  |
| 6   | 660.3   | 330.7   |         | 642.3   | A    | 1,706.8 | 853.9   | 1,689.7 | 1,688.7 | 15  |
| 7   | 775.3   | 388.2   |         | 757.3   | D    | 1,635.7 | 818.4   | 1,618.7 | 1,617.7 | 14  |
| 8   | 904.4   | 452.7   |         | 886.4   | E    | 1,520.7 | 760.8   | 1,503.7 | 1,502.7 | 13  |
| 9   | 1,033.4 | 517.2   |         | 1,015.4 | E    | 1,391.6 | 696.3   | 1,374.6 | 1,373.6 | 12  |
| 10  | 1,162.5 | 581.7   |         | 1,144.4 | E    | 1,262.6 | 631.8   | 1,245.6 | 1,244.6 | 11  |
| 11  | 1,277.5 | 639.2   |         | 1,259.5 | D    | 1,133.6 | 567.3   | 1,116.5 | 1,115.6 | 10  |
| 12  | 1,437.5 | 719.3   |         | 1,419.5 | C+57 | 1,018.5 | 509.8   | 1,001.5 | 1,000.5 | 9   |
| 13  | 1,565.6 | 783.3   | 1,548.5 | 1,547.6 | Q    | 858.5   | 429.8   | 841.5   | 840.5   | 8   |
| 14  | 1,636.6 | 818.8   | 1,619.6 | 1,618.6 | A    | 730.4   | 365.7   | 713.4   | 712.4   | 7   |
| 15  | 1,707.6 | 854.3   | 1,690.6 | 1,689.6 | A    | 659.4   | 330.2   | 642.4   | 641.4   | 6   |
| 16  | 1,794.7 | 897.8   | 1,777.7 | 1,776.7 | S    | 588.4   |         | 571.3   | 570.4   | 5   |
| 17  | 1,907.8 | 954.4   | 1,890.7 | 1,889.8 | L    | 501.3   |         | 484.3   |         | 4   |
| 18  | 2,020.8 | 1,010.9 | 2,003.8 | 2,002.8 | L    | 388.3   |         | 371.2   |         | 3   |
| 19  | 2,148.9 | 1,075.0 | 2,131.9 | 2,130.9 | Q    | 275.2   |         | 258.1   |         | 2   |
| 20  | 2,295.0 | 1,148.0 | 2,278.0 | 2,277.0 | K    | 147.1   |         | 130.1   |         | 1   |

# Nuclear proteome

| Protein No. | Leading protein name | Sequence          | Mascot Score | Variable Modifications  | SILAC State | Charge | m/z       |
|-------------|----------------------|-------------------|--------------|-------------------------|-------------|--------|-----------|
| N-2         | splP63261 ACTG_HUMAN | EEEIAALVIDNGSGMCK | 137.14       | Acetyl (Protein N-term) | Heavy       | 2      | 939.43461 |

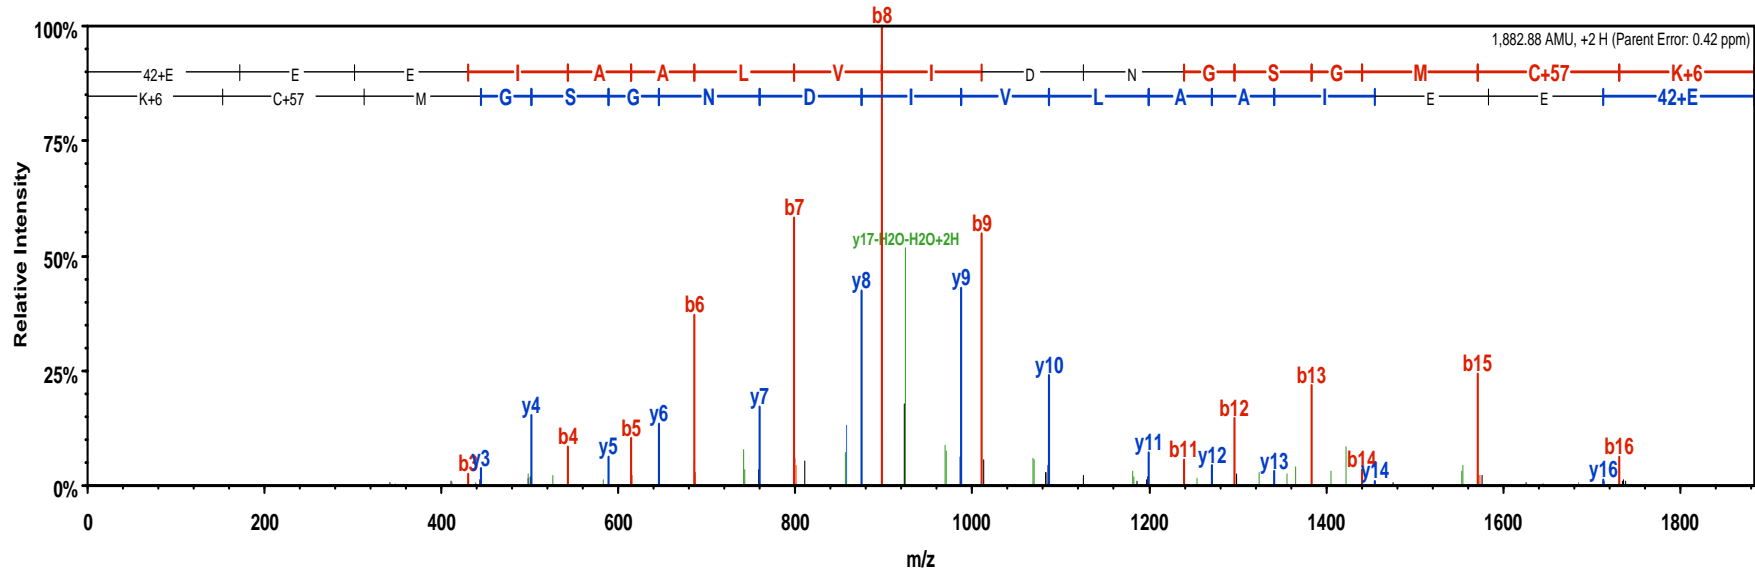

| ... | B Ions  | B+2H  | B-NH3   | B-H2O   | AA   | Y Ions  | Y+2H  | Y-NH3   | Y-H2O   | ... |
|-----|---------|-------|---------|---------|------|---------|-------|---------|---------|-----|
| 1   | 172.1   |       |         | 154.0   | E+42 | 1,883.9 | 942.4 | 1,866.9 | 1,865.9 | 17  |
| 2   | 301.1   |       |         | 283.1   | E    | 1,712.8 | 856.9 | 1,695.8 | 1,694.8 | 16  |
| 3   | 430.1   |       |         | 412.1   | E    | 1,583.8 | 792.4 | 1,566.8 | 1,565.8 | 15  |
| 4   | 543.2   |       |         | 525.2   | I    | 1,454.7 | 727.9 | 1,437.7 | 1,436.7 | 14  |
| 5   | 614.3   |       |         | 596.3   | A    | 1,341.7 | 671.3 | 1,324.6 | 1,323.6 | 13  |
| 6   | 685.3   | 343.2 |         | 667.3   | A    | 1,270.6 | 635.8 | 1,253.6 | 1,252.6 | 12  |
| 7   | 798.4   | 399.7 |         | 780.4   | L    | 1,199.6 | 600.3 | 1,182.6 | 1,181.6 | 11  |
| 8   | 897.5   | 449.2 |         | 879.4   | V    | 1,086.5 | 543.8 | 1,069.5 | 1,068.5 | 10  |
| 9   | 1,010.5 | 505.8 |         | 992.5   | I    | 987.4   | 494.2 | 970.4   | 969.4   | 9   |
| 10  | 1,125.6 | 563.3 |         | 1,107.6 | D    | 874.3   | 437.7 | 857.3   | 856.3   | 8   |
| 11  | 1,239.6 | 620.3 | 1,222.6 | 1,221.6 | N    | 759.3   | 380.2 | 742.3   | 741.3   | 7   |
| 12  | 1,296.6 | 648.8 | 1,279.6 | 1,278.6 | G    | 645.3   | 323.1 | 628.3   | 627.3   | 6   |
| 13  | 1,383.7 | 692.3 | 1,366.6 | 1,365.7 | S    | 588.3   |       | 571.2   | 570.2   | 5   |
| 14  | 1,440.7 | 720.8 | 1,423.7 | 1,422.7 | G    | 501.2   |       | 484.2   |         | 4   |
| 15  | 1,571.7 | 786.4 | 1,554.7 | 1,553.7 | M    | 444.2   |       | 427.2   |         | 3   |
| 16  | 1,731.8 | 866.4 | 1,714.7 | 1,713.7 | C+57 | 313.2   |       | 296.1   |         | 2   |
| 17  | 1,883.9 | 942.4 | 1,866.9 | 1,865.9 | K+6  | 153.1   |       | 136.1   |         | 1   |

# Nuclear proteome

| Protein No. | Leading protein name | Sequence             | Mascot Score | Variable Modifications | SILAC State | Charge | m/z      |
|-------------|----------------------|----------------------|--------------|------------------------|-------------|--------|----------|
| N-3         | sp P23434 GCSH_HUMAN | MTLSNPSELDELMSEEAYEK | 129.93       | Oxidation (M)          | Heavy       | 2      | 1166.514 |

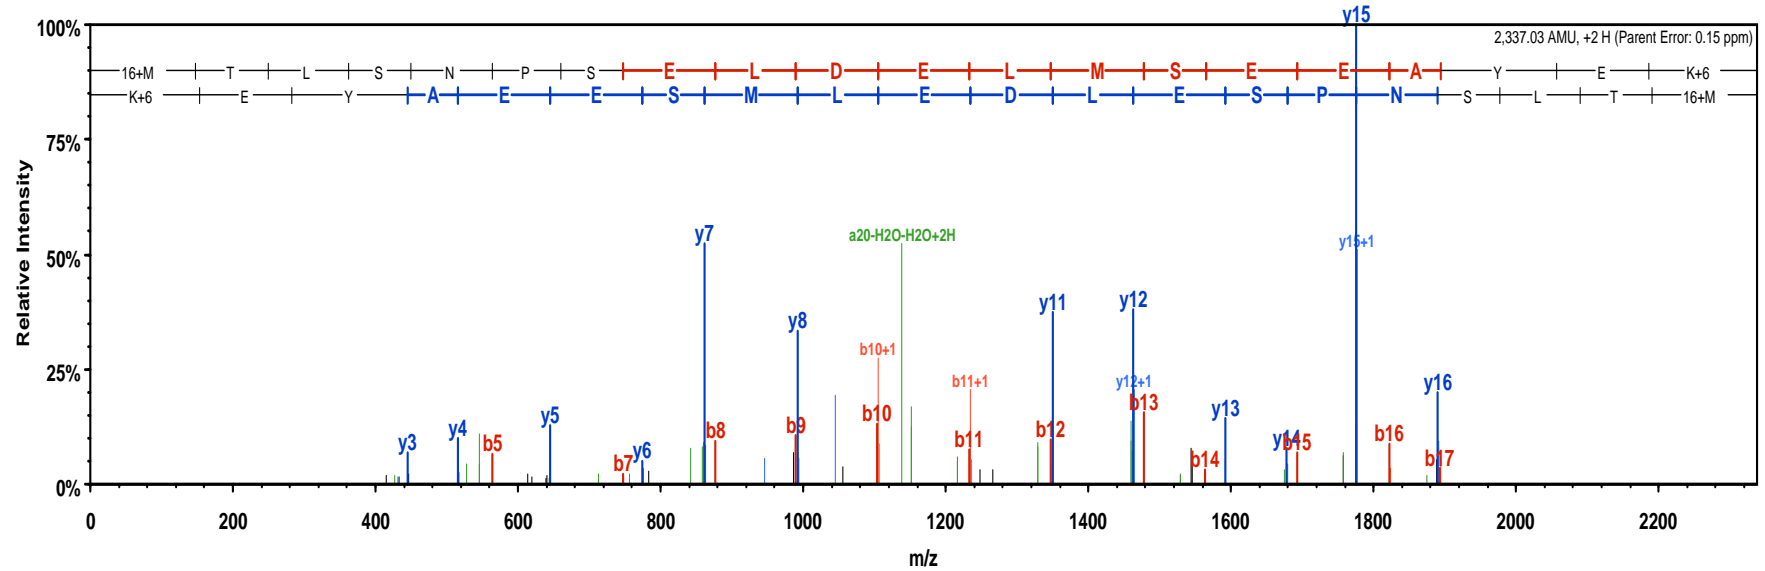

| ... | B Ions  | B+2H    | B-NH3   | B-H2O   | AA   | Y Ions  | Y+2H    | Y-MH3   | Y-H2O   | ... |
|-----|---------|---------|---------|---------|------|---------|---------|---------|---------|-----|
| 1   | 148.0   |         |         |         | M+16 | 2,338.0 | 1,169.5 | 2,321.0 | 2,320.0 | 20  |
| 2   | 249.1   |         |         | 231.1   | T    | 2,191.0 | 1,096.0 | 2,174.0 | 2,173.0 | 19  |
| 3   | 362.2   |         |         | 344.2   | L    | 2,090.0 | 1,045.5 | 2,072.9 | 2,071.9 | 18  |
| 4   | 449.2   |         |         | 431.2   | S    | 1,976.9 | 988.9   | 1,959.8 | 1,958.9 | 17  |
| 5   | 563.2   |         | 546.2   | 545.2   | N    | 1,889.8 | 945.4   | 1,872.8 | 1,871.8 | 16  |
| 6   | 660.3   | 330.7   | 643.3   | 642.3   | P    | 1,775.8 | 888.4   | 1,758.8 | 1,757.8 | 15  |
| 7   | 747.3   | 374.2   | 730.3   | 729.3   | S    | 1,678.7 | 839.9   | 1,661.7 | 1,660.7 | 14  |
| 8   | 876.4   | 438.7   | 859.4   | 858.4   | E    | 1,591.7 | 796.4   | 1,574.7 | 1,573.7 | 13  |
| 9   | 989.5   | 495.2   | 972.4   | 971.5   | L    | 1,462.7 | 731.8   | 1,445.6 | 1,444.7 | 12  |
| 10  | 1,104.5 | 552.7   | 1,087.5 | 1,086.5 | D    | 1,349.6 | 675.3   | 1,332.6 | 1,331.6 | 11  |
| 11  | 1,233.5 | 617.3   | 1,216.5 | 1,215.5 | E    | 1,234.6 | 617.8   | 1,217.5 | 1,216.5 | 10  |
| 12  | 1,346.6 | 673.8   | 1,329.6 | 1,328.6 | L    | 1,105.5 | 553.3   | 1,088.5 | 1,087.5 | 9   |
| 13  | 1,477.7 | 739.3   | 1,460.6 | 1,459.6 | M    | 992.4   | 496.7   | 975.4   | 974.4   | 8   |
| 14  | 1,564.7 | 782.8   | 1,547.7 | 1,546.7 | S    | 861.4   | 431.2   | 844.4   | 843.4   | 7   |
| 15  | 1,693.7 | 847.4   | 1,676.7 | 1,675.7 | E    | 774.4   | 387.7   | 757.3   | 756.4   | 6   |
| 16  | 1,822.8 | 911.9   | 1,805.7 | 1,804.8 | E    | 645.3   |         | 628.3   | 627.3   | 5   |
| 17  | 1,893.8 | 947.4   | 1,876.8 | 1,875.8 | A    | 516.3   |         | 499.2   | 498.3   | 4   |
| 18  | 2,056.9 | 1,028.9 | 2,039.8 | 2,038.9 | Y    | 445.2   |         | 428.2   | 427.2   | 3   |
| 19  | 2,185.9 | 1,093.5 | 2,168.9 | 2,167.9 | E    | 282.2   |         | 265.1   | 264.2   | 2   |
| 20  | 2,338.0 | 1,169.5 | 2,321.0 | 2,320.0 | K+6  | 153.1   |         | 136.1   |         | 1   |

# Nuclear proteome

| Protein No. | Leading protein name  | Sequence            | Mascot Score | Variable Modifications | SILAC State | Charge | m/z       |
|-------------|-----------------------|---------------------|--------------|------------------------|-------------|--------|-----------|
| N-4         | sp Q96DB5 IRMD1_HUMAN | VEEILEQADYLYESGETEK | 125.77       | Unmodified             | Light       | 2      | 1123.0234 |

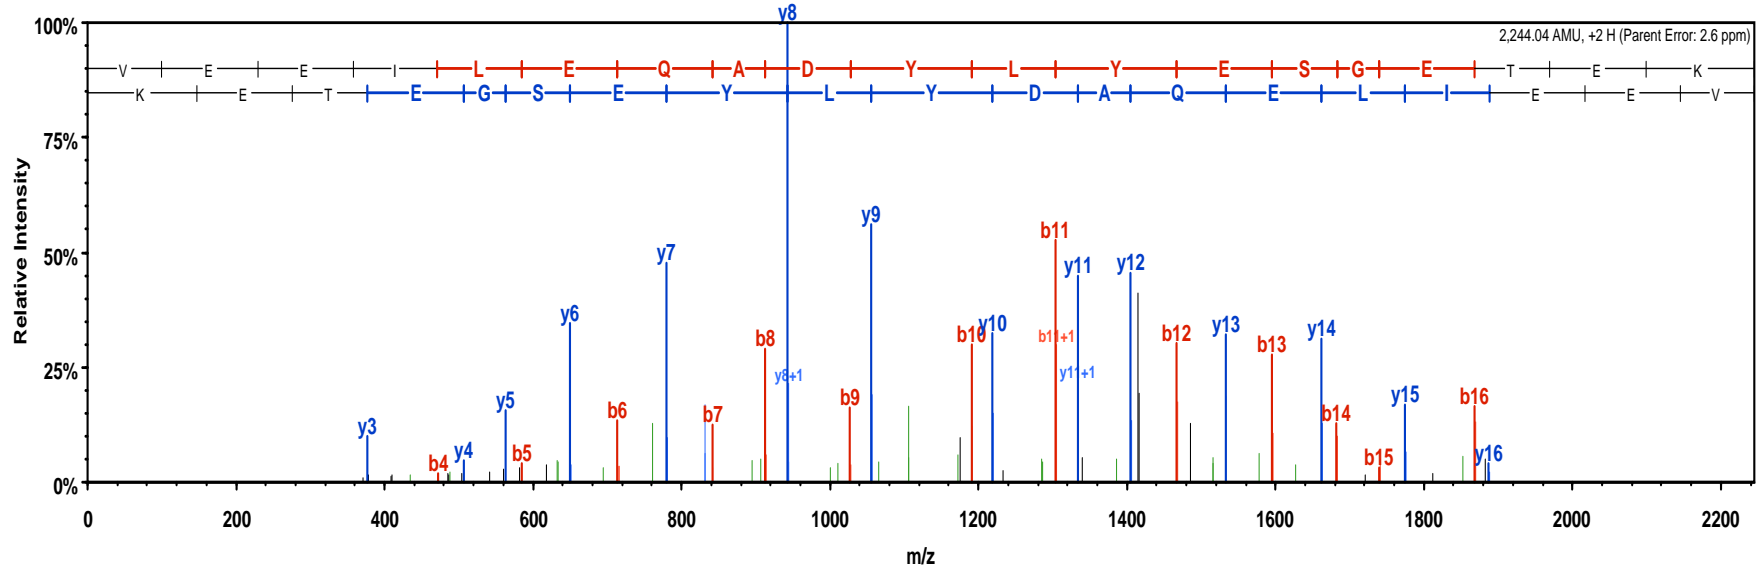

| ... | B Ions  | B+2H    | B-NH3   | B-H2O   | AA | Y Ions  | Y+2H    | Y-NH3   | Y-H2O   | ... |
|-----|---------|---------|---------|---------|----|---------|---------|---------|---------|-----|
| 1   | 100.1   |         |         |         | V  | 2,245.0 | 1,123.0 | 2,228.0 | 2,227.0 | 19  |
| 2   | 229.1   |         |         | 211.1   | E  | 2,146.0 | 1,073.5 | 2,128.9 | 2,128.0 | 18  |
| 3   | 358.2   |         |         | 340.2   | E  | 2,016.9 | 1,009.0 | 1,999.9 | 1,998.9 | 17  |
| 4   | 471.2   |         |         | 453.2   | I  | 1,887.9 | 944.4   | 1,870.9 | 1,869.9 | 16  |
| 5   | 584.3   |         |         | 566.3   | L  | 1,774.8 | 887.9   | 1,757.8 | 1,756.8 | 15  |
| 6   | 713.4   | 357.2   |         | 695.4   | E  | 1,661.7 | 831.4   | 1,644.7 | 1,643.7 | 14  |
| 7   | 841.4   | 421.2   | 824.4   | 823.4   | Q  | 1,532.7 | 766.8   | 1,515.6 | 1,514.7 | 13  |
| 8   | 912.5   | 456.7   | 895.4   | 894.5   | A  | 1,404.6 | 702.8   | 1,387.6 | 1,386.6 | 12  |
| 9   | 1,027.5 | 514.3   | 1,010.5 | 1,009.5 | D  | 1,333.6 | 667.3   | 1,316.6 | 1,315.6 | 11  |
| 10  | 1,190.6 | 595.8   | 1,173.5 | 1,172.5 | Y  | 1,218.6 | 609.8   | 1,201.5 | 1,200.5 | 10  |
| 11  | 1,303.6 | 652.3   | 1,286.6 | 1,285.6 | L  | 1,055.5 | 528.2   | 1,038.5 | 1,037.5 | 9   |
| 12  | 1,466.7 | 733.9   | 1,449.7 | 1,448.7 | Y  | 942.4   | 471.7   | 925.4   | 924.4   | 8   |
| 13  | 1,595.7 | 798.4   | 1,578.7 | 1,577.7 | E  | 779.3   | 390.2   | 762.3   | 761.3   | 7   |
| 14  | 1,682.8 | 841.9   | 1,665.8 | 1,664.8 | S  | 650.3   | 325.7   | 633.3   | 632.3   | 6   |
| 15  | 1,739.8 | 870.4   | 1,722.8 | 1,721.8 | G  | 563.3   |         | 546.2   | 545.3   | 5   |
| 16  | 1,868.8 | 934.9   | 1,851.8 | 1,850.8 | E  | 506.2   |         | 489.2   | 488.2   | 4   |
| 17  | 1,969.9 | 985.4   | 1,952.9 | 1,951.9 | T  | 377.2   |         | 360.2   | 359.2   | 3   |
| 18  | 2,098.9 | 1,050.0 | 2,081.9 | 2,080.9 | E  | 276.2   |         | 259.1   | 258.1   | 2   |
| 19  | 2,245.0 | 1,123.0 | 2,228.0 | 2,227.0 | K  | 147.1   |         | 130.1   |         | 1   |

# Nuclear proteome

| Protein No. | Leading protein name | Sequence                        | Mascot Score | Variable Modifications | SILAC State | Charge | m/z       |
|-------------|----------------------|---------------------------------|--------------|------------------------|-------------|--------|-----------|
| N-5         | sp Q71DI3 H32_HUMAN  | FQSSAVMLQEASEAYLVGLFEDTNLCAIHAK | 119.54       | Oxidation (M)          | Light       | 3      | 1177.2374 |

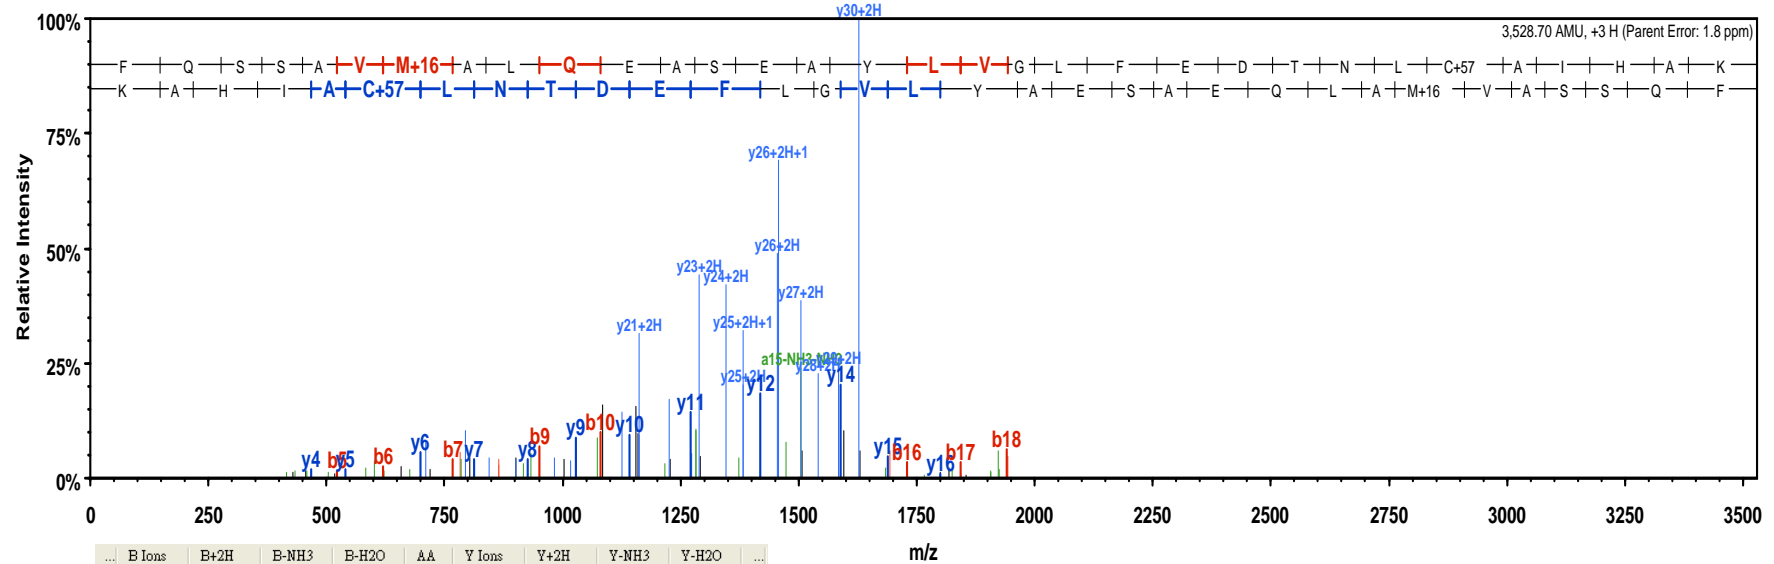

# Nuclear proteome

| Protein No. | Leading protein name  | Sequence                | Mascot Score | Variable Modifications | SILAC State | Charge | m/z       |
|-------------|-----------------------|-------------------------|--------------|------------------------|-------------|--------|-----------|
| N-6         | sp Q9Y3D7 TIM16_HUMAN | SAAASNLSGLSLQEAQQILNVSK | 114.78       | Unmodified             | Light       | 2      | 1165.1215 |

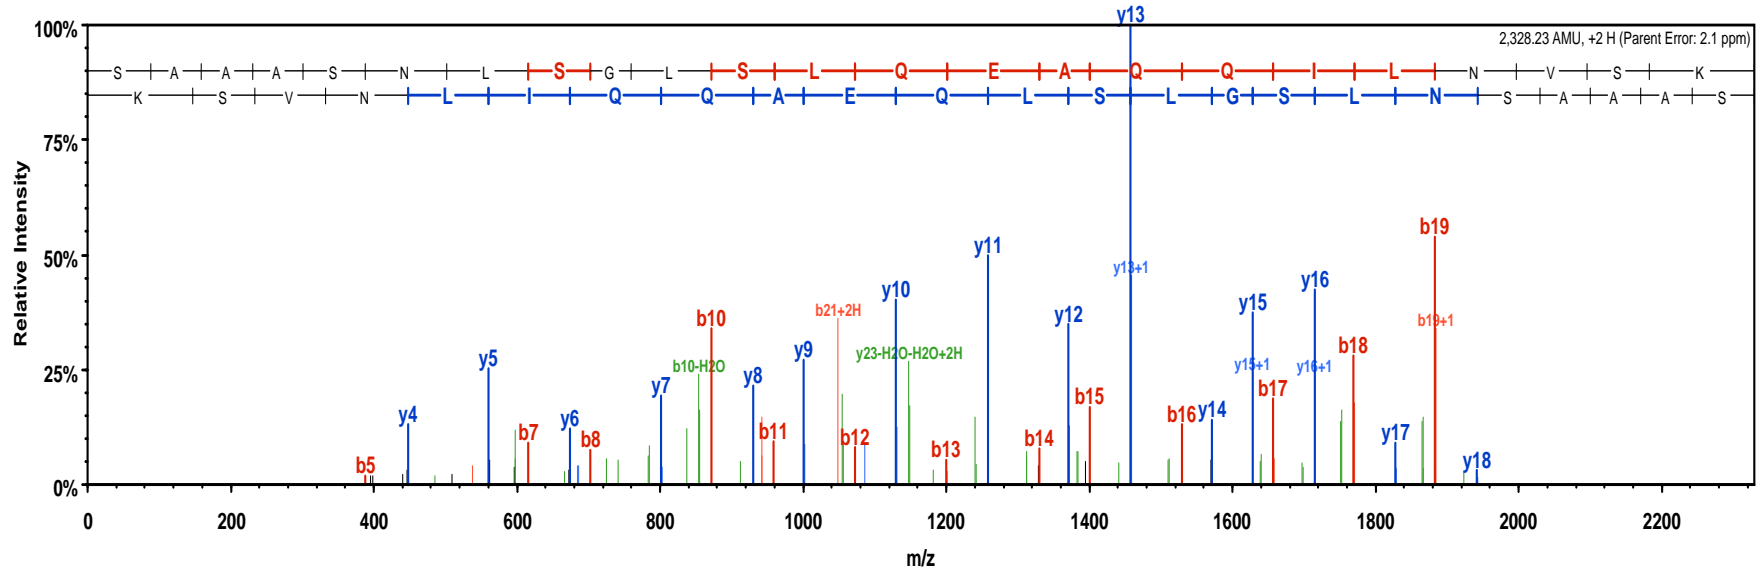

| ... | B Ions  | B+2H    | B-NH3   | B-H2O   | AA | Y Ions  | Y+2H    | Y-NH3   | Y-H2O   | ... |
|-----|---------|---------|---------|---------|----|---------|---------|---------|---------|-----|
| 1   | 88.0    |         |         | 70.0    | S  | 2,329.2 | 1,165.1 | 2,312.2 | 2,311.2 | 23  |
| 2   | 159.1   |         |         | 141.1   | A  | 2,242.2 | 1,121.6 | 2,225.2 | 2,224.2 | 22  |
| 3   | 230.1   |         |         | 212.1   | A  | 2,171.2 | 1,086.1 | 2,154.1 | 2,153.2 | 21  |
| 4   | 301.2   |         |         | 283.1   | A  | 2,100.1 | 1,050.6 | 2,083.1 | 2,082.1 | 20  |
| 5   | 388.2   |         |         | 370.2   | S  | 2,029.1 | 1,015.0 | 2,012.1 | 2,011.1 | 19  |
| 6   | 502.2   | 251.6   | 485.2   | 484.2   | N  | 1,942.1 | 971.5   | 1,925.0 | 1,924.0 | 18  |
| 7   | 615.3   | 308.2   | 598.3   | 597.3   | L  | 1,828.0 | 914.5   | 1,811.0 | 1,810.0 | 17  |
| 8   | 702.3   | 351.7   | 685.3   | 684.3   | S  | 1,714.9 | 858.0   | 1,697.9 | 1,696.9 | 16  |
| 9   | 759.4   | 380.2   | 742.3   | 741.4   | G  | 1,627.9 | 814.5   | 1,610.9 | 1,609.9 | 15  |
| 10  | 872.4   | 436.7   | 855.4   | 854.4   | L  | 1,570.9 | 785.9   | 1,553.9 | 1,552.9 | 14  |
| 11  | 959.5   | 480.2   | 942.5   | 941.5   | S  | 1,457.8 | 729.4   | 1,440.8 | 1,439.8 | 13  |
| 12  | 1,072.6 | 536.8   | 1,055.5 | 1,054.6 | L  | 1,370.8 | 685.9   | 1,353.7 | 1,352.8 | 12  |
| 13  | 1,200.6 | 600.8   | 1,183.6 | 1,182.6 | Q  | 1,257.7 | 629.3   | 1,240.7 | 1,239.7 | 11  |
| 14  | 1,329.7 | 665.3   | 1,312.6 | 1,311.7 | E  | 1,129.6 | 565.3   | 1,112.6 | 1,111.6 | 10  |
| 15  | 1,400.7 | 700.9   | 1,383.7 | 1,382.7 | A  | 1,000.6 | 500.8   | 983.6   | 982.6   | 9   |
| 16  | 1,528.8 | 764.9   | 1,511.7 | 1,510.7 | Q  | 929.5   | 465.3   | 912.5   | 911.5   | 8   |
| 17  | 1,656.8 | 828.9   | 1,639.8 | 1,638.8 | Q  | 801.5   | 401.2   | 784.5   | 783.5   | 7   |
| 18  | 1,769.9 | 885.5   | 1,752.9 | 1,751.9 | I  | 673.4   | 337.2   | 656.4   | 655.4   | 6   |
| 19  | 1,883.0 | 942.0   | 1,866.0 | 1,865.0 | L  | 560.3   |         | 543.3   | 542.3   | 5   |
| 20  | 1,997.0 | 999.0   | 1,980.0 | 1,979.0 | N  | 447.3   |         | 430.2   | 429.2   | 4   |
| 21  | 2,096.1 | 1,048.6 | 2,079.1 | 2,078.1 | V  | 333.2   |         | 316.2   | 315.2   | 3   |
| 22  | 2,183.1 | 1,092.1 | 2,166.1 | 2,165.1 | S  | 234.1   |         | 217.1   | 216.1   | 2   |
| 23  | 2,329.2 | 1,165.1 | 2,312.2 | 2,311.2 | K  | 147.1   |         | 130.1   |         | 1   |

# Nuclear proteome

| Protein No. | Leading protein name  | Sequence                      | Mascot Score | Variable Modifications | SILAC State | Charge | m/z       |
|-------------|-----------------------|-------------------------------|--------------|------------------------|-------------|--------|-----------|
| N-7         | spIQ6FI13IH2A2A_HUMAN | VGAGAPVYMAAVLEYLTAEILELAGNAAR | 114.18       | Unmodified             |             | 2      | 1467.2757 |

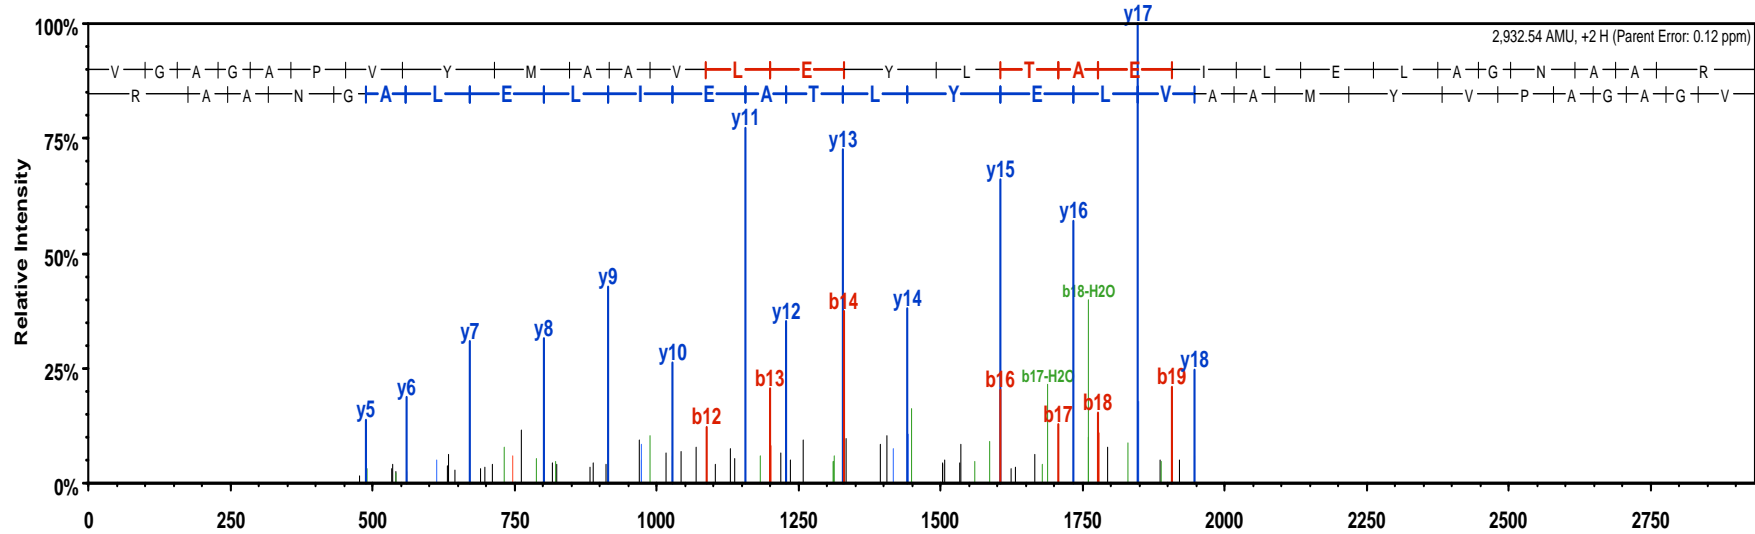

| ... | B Ions  | B+2H    | B-NH3   | B-H2O   | AA | Y Ions  | Y+2H    | Y-NH3   | Y-H2O   | ... |
|-----|---------|---------|---------|---------|----|---------|---------|---------|---------|-----|
| 1   | 100.1   |         |         |         | V  | 2,933.5 | 1,467.3 | 2,916.5 | 2,915.5 | 29  |
| 2   | 157.1   |         |         |         | G  | 2,834.5 | 1,417.7 | 2,817.4 | 2,816.5 | 28  |
| 3   | 228.1   |         |         |         | A  | 2,777.5 | 1,389.2 | 2,760.4 | 2,759.4 | 27  |
| 4   | 285.2   |         |         |         | G  | 2,706.4 | 1,353.7 | 2,689.4 | 2,688.4 | 26  |
| 5   | 356.2   |         |         |         | A  | 2,649.4 | 1,325.2 | 2,632.4 | 2,631.4 | 25  |
| 6   | 453.2   | 227.1   |         |         | P  | 2,578.4 | 1,289.7 | 2,561.3 | 2,560.3 | 24  |
| 7   | 552.3   | 276.7   |         |         | V  | 2,481.3 | 1,241.2 | 2,464.3 | 2,463.3 | 23  |
| 8   | 715.4   | 358.2   |         |         | Y  | 2,382.2 | 1,191.6 | 2,365.2 | 2,364.2 | 22  |
| 9   | 846.4   | 423.7   |         |         | M  | 2,219.2 | 1,110.1 | 2,202.1 | 2,201.2 | 21  |
| 10  | 917.5   | 459.2   |         |         | A  | 2,088.1 | 1,044.6 | 2,071.1 | 2,070.1 | 20  |
| 11  | 988.5   | 494.7   |         |         | A  | 2,017.1 | 1,009.1 | 2,000.1 | 1,999.1 | 19  |
| 12  | 1,087.6 | 544.3   |         |         | V  | 1,946.1 | 973.5   | 1,929.0 | 1,928.0 | 18  |
| 13  | 1,200.6 | 600.8   |         |         | L  | 1,847.0 | 924.0   | 1,830.0 | 1,829.0 | 17  |
| 14  | 1,329.7 | 665.3   |         | 1,311.7 | E  | 1,733.9 | 867.5   | 1,716.9 | 1,715.9 | 16  |
| 15  | 1,492.8 | 746.9   |         | 1,474.7 | Y  | 1,604.9 | 802.9   | 1,587.8 | 1,586.9 | 15  |
| 16  | 1,605.8 | 803.4   |         | 1,587.8 | L  | 1,441.8 | 721.4   | 1,424.8 | 1,423.8 | 14  |
| 17  | 1,706.9 | 853.9   |         | 1,688.9 | T  | 1,328.7 | 664.9   | 1,311.7 | 1,310.7 | 13  |
| 18  | 1,777.9 | 889.5   |         | 1,759.9 | A  | 1,227.7 | 614.3   | 1,210.6 | 1,209.7 | 12  |
| 19  | 1,907.0 | 954.0   |         | 1,889.0 | E  | 1,156.6 | 578.8   | 1,139.6 | 1,138.6 | 11  |
| 20  | 2,020.0 | 1,010.5 |         | 2,002.0 | I  | 1,027.6 | 514.3   | 1,010.6 | 1,009.6 | 10  |
| 21  | 2,133.1 | 1,067.1 |         | 2,115.1 | L  | 914.5   | 457.8   | 897.5   | 896.5   | 9   |
| 22  | 2,262.2 | 1,131.6 |         | 2,244.2 | E  | 801.4   | 401.2   | 784.4   | 783.4   | 8   |
| 23  | 2,375.3 | 1,188.1 |         | 2,357.2 | L  | 672.4   | 336.7   | 655.4   |         | 7   |
| 24  | 2,446.3 | 1,223.7 |         | 2,428.3 | A  | 559.3   | 280.2   | 542.3   |         | 6   |
| 25  | 2,503.3 | 1,252.2 |         | 2,485.3 | G  | 488.3   |         | 471.2   |         | 5   |
| 26  | 2,617.4 | 1,309.2 | 2,600.3 | 2,599.3 | N  | 431.2   |         | 414.2   |         | 4   |
| 27  | 2,688.4 | 1,344.7 | 2,671.4 | 2,670.4 | A  | 317.2   |         | 300.2   |         | 3   |
| 28  | 2,759.4 | 1,380.2 | 2,742.4 | 2,741.4 | A  | 246.2   |         | 229.1   |         | 2   |
| 29  | 2,933.5 | 1,467.3 | 2,916.5 | 2,915.5 | R  | 175.1   |         | 158.1   |         | 1   |



# Nuclear proteome

| Protein No. | Leading protein name | Sequence         | Mascot Score | Variable Modifications | SILAC State | Charge | m/z       |
|-------------|----------------------|------------------|--------------|------------------------|-------------|--------|-----------|
| N-8         | spIP16403IH12_HUMAN  | SETAPAAPAAAPPAEK | 110.15       | Unmodified             | Heavy       | 2      | 739.87791 |

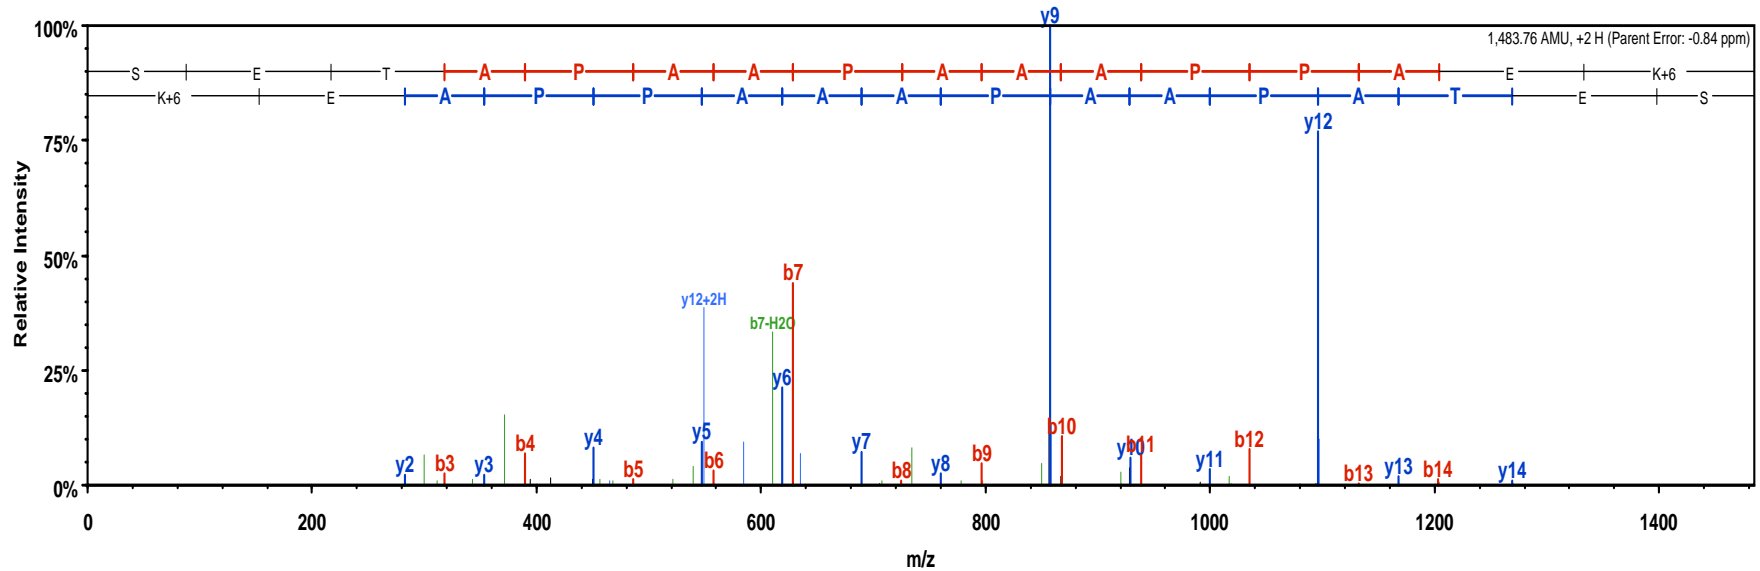

| ... | B Ions  | B+2H  | B-NH3   | B-H2O   | AA  | Y Ions  | Y+2H  | Y-NH3   | Y-H2O   | ... |
|-----|---------|-------|---------|---------|-----|---------|-------|---------|---------|-----|
| 1   | 88.0    |       |         | 70.0    | S   | 1,484.8 | 742.9 | 1,467.7 | 1,466.8 | 16  |
| 2   | 217.1   |       |         | 199.1   | E   | 1,397.7 | 699.4 | 1,380.7 | 1,379.7 | 15  |
| 3   | 318.1   |       |         | 300.1   | T   | 1,268.7 | 634.9 | 1,251.7 | 1,250.7 | 14  |
| 4   | 389.2   |       |         | 371.2   | A   | 1,167.6 | 584.3 | 1,150.6 | 1,149.6 | 13  |
| 5   | 486.2   |       |         | 468.2   | P   | 1,096.6 | 548.8 | 1,079.6 | 1,078.6 | 12  |
| 6   | 557.3   | 279.1 |         | 539.2   | A   | 999.6   | 500.3 | 982.5   | 981.5   | 11  |
| 7   | 628.3   | 314.7 |         | 610.3   | A   | 928.5   | 464.8 | 911.5   | 910.5   | 10  |
| 8   | 725.3   | 363.2 |         | 707.3   | P   | 857.5   | 429.2 | 840.5   | 839.5   | 9   |
| 9   | 796.4   | 398.7 |         | 778.4   | A   | 760.4   | 380.7 | 743.4   | 742.4   | 8   |
| 10  | 867.4   | 434.2 |         | 849.4   | A   | 689.4   | 345.2 | 672.4   | 671.4   | 7   |
| 11  | 938.5   | 469.7 |         | 920.4   | A   | 618.4   | 309.7 | 601.3   | 600.3   | 6   |
| 12  | 1,035.5 | 518.3 |         | 1,017.5 | P   | 547.3   |       | 530.3   | 529.3   | 5   |
| 13  | 1,132.6 | 566.8 |         | 1,114.6 | P   | 450.3   |       | 433.2   | 432.3   | 4   |
| 14  | 1,203.6 | 602.3 |         | 1,185.6 | A   | 353.2   |       | 336.2   | 335.2   | 3   |
| 15  | 1,332.6 | 666.8 |         | 1,314.6 | E   | 282.2   |       | 265.1   | 264.2   | 2   |
| 16  | 1,484.8 | 742.9 | 1,467.7 | 1,466.8 | K+6 | 153.1   |       | 136.1   |         | 1   |

# Nuclear proteome

| Protein No. | Leading protein name  | Sequence       | Mascot Score | Variable Modifications | SILAC State | Charge | m/z      |
|-------------|-----------------------|----------------|--------------|------------------------|-------------|--------|----------|
| N-9         | sp O14519 CDKA1_HUMAN | YAELLAIIIEELGK | 108.99       | Unmodified             | Heavy       | 2      | 731.4136 |

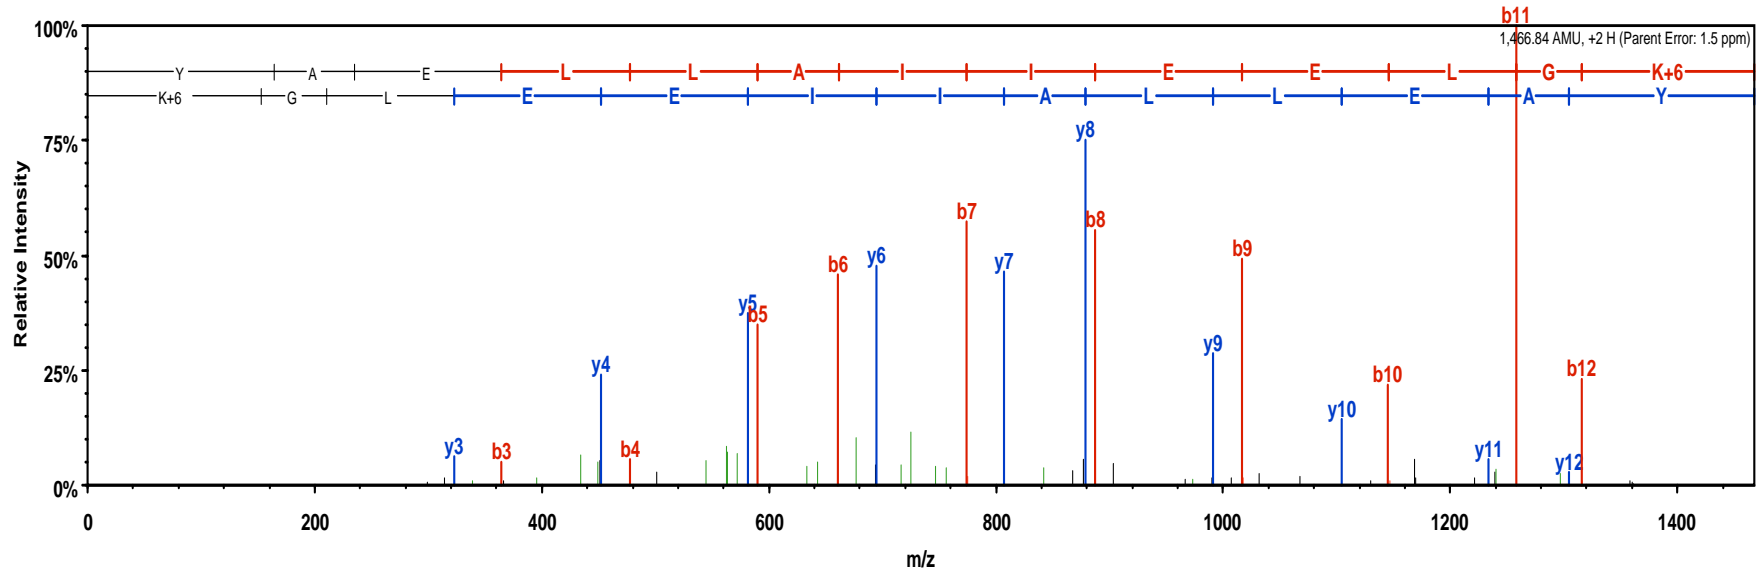

| ... | B Ions  | B+2H  | B-NH3   | B-H2O   | AA  | Y Ions  | Y+2H  | Y-NH3   | Y-H2O   | ... |
|-----|---------|-------|---------|---------|-----|---------|-------|---------|---------|-----|
| 1   | 164.1   |       |         |         | Y   | 1,467.8 | 734.4 | 1,450.8 | 1,449.8 | 13  |
| 2   | 235.1   |       |         |         | A   | 1,304.8 | 652.9 | 1,287.8 | 1,286.8 | 12  |
| 3   | 364.2   |       |         | 346.1   | E   | 1,233.7 | 617.4 | 1,216.7 | 1,215.7 | 11  |
| 4   | 477.2   |       |         | 459.2   | L   | 1,104.7 | 552.9 | 1,087.7 | 1,086.7 | 10  |
| 5   | 590.3   |       |         | 572.3   | L   | 991.6   | 496.3 | 974.6   | 973.6   | 9   |
| 6   | 661.4   | 331.2 |         | 643.3   | A   | 878.5   | 439.8 | 861.5   | 860.5   | 8   |
| 7   | 774.4   | 387.7 |         | 756.4   | I   | 807.5   | 404.2 | 790.5   | 789.5   | 7   |
| 8   | 887.5   | 444.3 |         | 869.5   | I   | 694.4   | 347.7 | 677.4   | 676.4   | 6   |
| 9   | 1,016.6 | 508.8 |         | 998.6   | E   | 581.3   |       | 564.3   | 563.3   | 5   |
| 10  | 1,145.6 | 573.3 |         | 1,127.6 | E   | 452.3   |       | 435.3   | 434.3   | 4   |
| 11  | 1,258.7 | 629.9 |         | 1,240.7 | L   | 323.2   |       | 306.2   |         | 3   |
| 12  | 1,315.7 | 658.4 |         | 1,297.7 | G   | 210.2   |       | 193.1   |         | 2   |
| 13  | 1,467.8 | 734.4 | 1,450.8 | 1,449.8 | K+6 | 153.1   |       | 136.1   |         | 1   |

# Nuclear proteome

| Protein No. | Leading protein name  | Sequence          | Mascot Score | Variable Modifications | SILAC State | Charge | m/z       |
|-------------|-----------------------|-------------------|--------------|------------------------|-------------|--------|-----------|
| N-10        | spIP62820 RAB1A_HUMAN | NATNVEQSFMTMAAEIK | 108.84       | Unmodified             | Heavy       | 2      | 942.94514 |

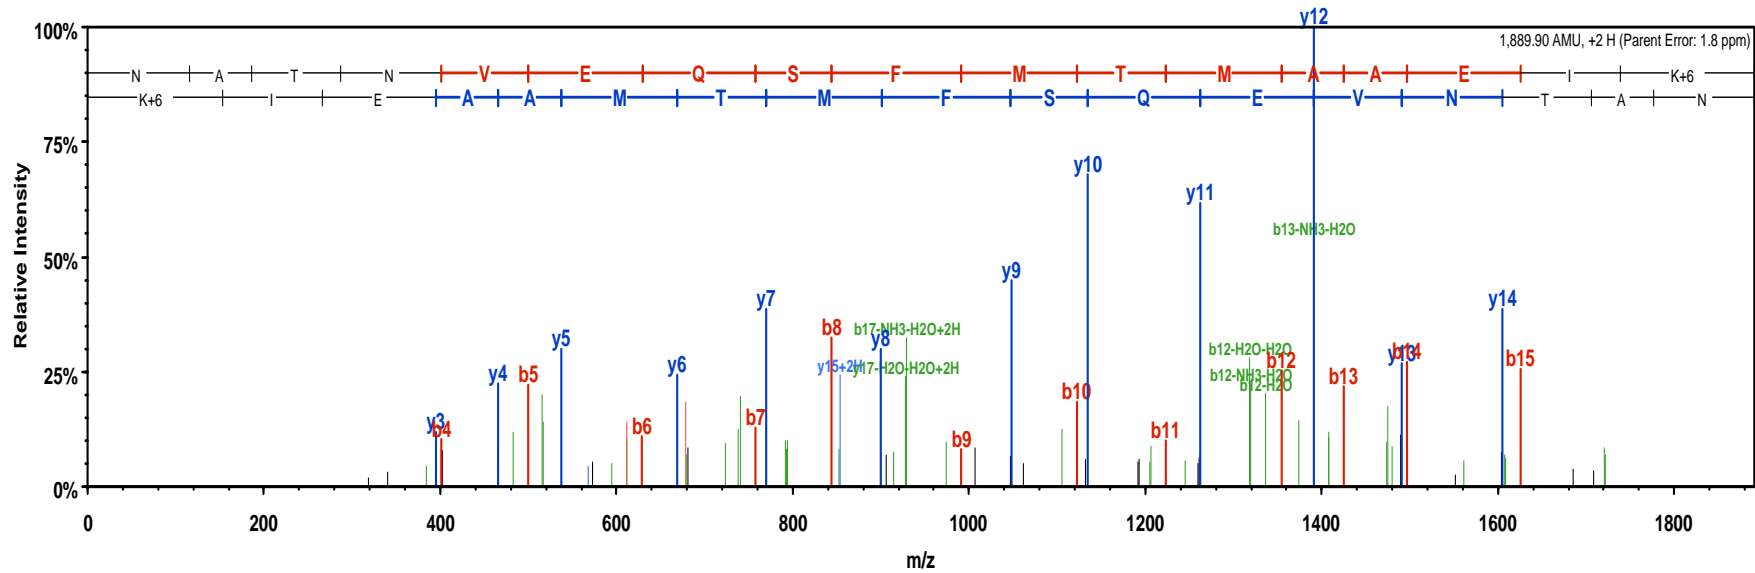

| ... | B Ions  | B+2H  | B-NH3   | B-H2O   | AA  | Y Ions  | Y+2H  | Y-NH3   | Y-H2O   | ... |
|-----|---------|-------|---------|---------|-----|---------|-------|---------|---------|-----|
| 1   | 115.1   |       | 98.0    |         | N   | 1,890.9 | 946.0 | 1,873.9 | 1,872.9 | 17  |
| 2   | 186.1   |       | 169.1   |         | A   | 1,776.9 | 888.9 | 1,759.8 | 1,758.8 | 16  |
| 3   | 287.1   |       | 270.1   | 269.1   | T   | 1,705.8 | 853.4 | 1,688.8 | 1,687.8 | 15  |
| 4   | 401.2   |       | 384.2   | 383.2   | N   | 1,604.8 | 802.9 | 1,587.7 | 1,586.8 | 14  |
| 5   | 500.2   |       | 483.2   | 482.2   | V   | 1,490.7 | 745.9 | 1,473.7 | 1,472.7 | 13  |
| 6   | 629.3   | 315.1 | 612.3   | 611.3   | E   | 1,391.7 | 696.3 | 1,374.6 | 1,373.7 | 12  |
| 7   | 757.3   | 379.2 | 740.3   | 739.3   | Q   | 1,262.6 | 631.8 | 1,245.6 | 1,244.6 | 11  |
| 8   | 844.4   | 422.7 | 827.4   | 826.4   | S   | 1,134.6 | 567.8 | 1,117.5 | 1,116.6 | 10  |
| 9   | 991.4   | 496.2 | 974.4   | 973.4   | F   | 1,047.5 | 524.3 | 1,030.5 | 1,029.5 | 9   |
| 10  | 1,122.5 | 561.7 | 1,105.5 | 1,104.5 | M   | 900.5   | 450.7 | 883.4   | 882.5   | 8   |
| 11  | 1,223.5 | 612.3 | 1,206.5 | 1,205.5 | T   | 769.4   | 385.2 | 752.4   | 751.4   | 7   |
| 12  | 1,354.6 | 677.8 | 1,337.6 | 1,336.6 | M   | 668.4   | 334.7 | 651.3   | 650.4   | 6   |
| 13  | 1,425.6 | 713.3 | 1,408.6 | 1,407.6 | A   | 537.3   |       | 520.3   | 519.3   | 5   |
| 14  | 1,496.7 | 748.8 | 1,479.6 | 1,478.6 | A   | 466.3   |       | 449.3   | 448.3   | 4   |
| 15  | 1,625.7 | 813.4 | 1,608.7 | 1,607.7 | E   | 395.3   |       | 378.2   | 377.2   | 3   |
| 16  | 1,738.8 | 869.9 | 1,721.8 | 1,720.8 | I   | 266.2   |       | 249.2   |         | 2   |
| 17  | 1,890.9 | 946.0 | 1,873.9 | 1,872.9 | K+6 | 153.1   |       | 136.1   |         | 1   |

# Nuclear proteome

| Protein No. | Leading protein name  | Sequence            | Mascot Score | Variable Modifications | SILAC State | Charge | m/z       |
|-------------|-----------------------|---------------------|--------------|------------------------|-------------|--------|-----------|
| N-11        | sp Q9Y375 CIA30_HUMAN | EVALDITSSEEKPDVSFDK | 108.49       | Unmodified             | Light       | 2      | 1055.0153 |

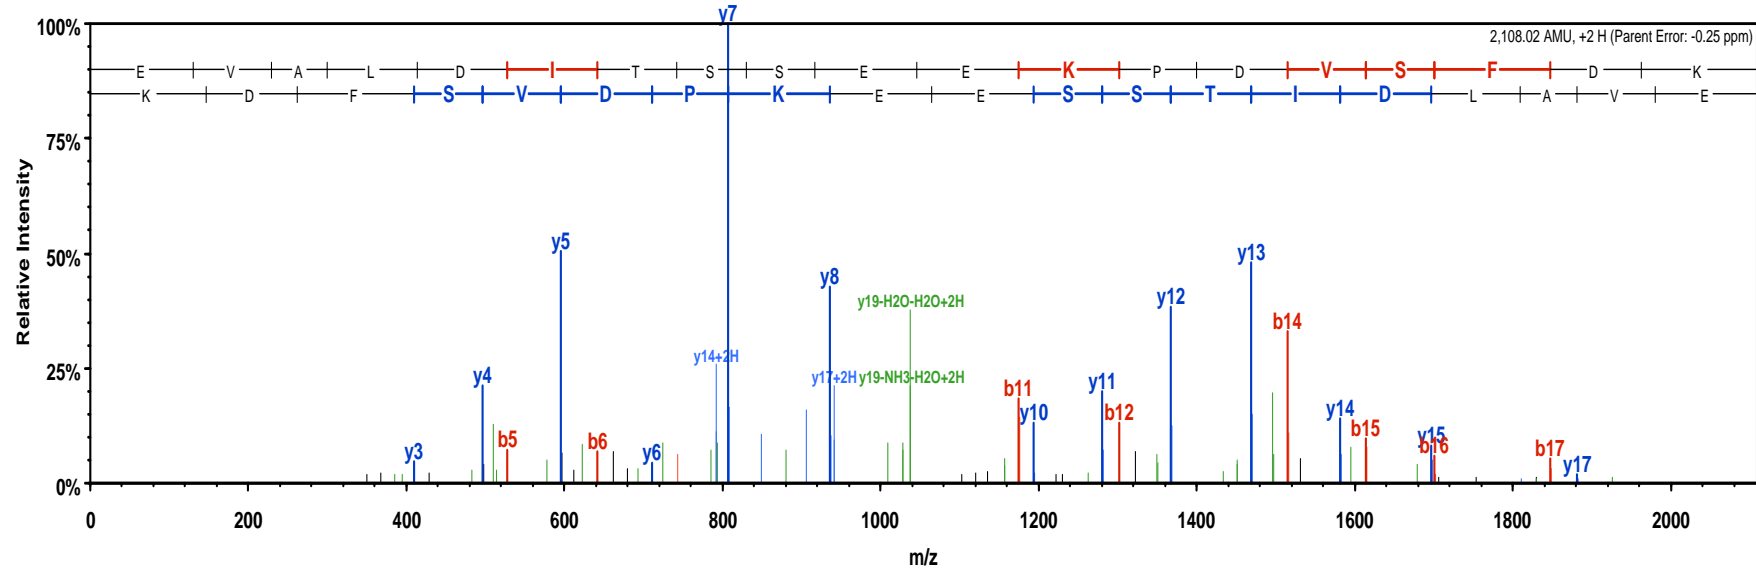

| ... | B Ions  | B+2H    | B-NH3   | B-H2O   | AA | Y Ions  | Y+2H    | Y-NH3   | Y-H2O   | ... |
|-----|---------|---------|---------|---------|----|---------|---------|---------|---------|-----|
| 1   | 130.0   |         |         | 112.0   | E  | 2,109.0 | 1,055.0 | 2,092.0 | 2,091.0 | 19  |
| 2   | 229.1   |         |         | 211.1   | V  | 1,980.0 | 990.5   | 1,963.0 | 1,962.0 | 18  |
| 3   | 300.2   |         |         | 282.1   | A  | 1,880.9 | 941.0   | 1,863.9 | 1,862.9 | 17  |
| 4   | 413.2   |         |         | 395.2   | L  | 1,809.9 | 905.4   | 1,792.8 | 1,791.9 | 16  |
| 5   | 528.3   |         |         | 510.3   | D  | 1,696.8 | 848.9   | 1,679.8 | 1,678.8 | 15  |
| 6   | 641.4   | 321.2   |         | 623.3   | I  | 1,581.8 | 791.4   | 1,564.7 | 1,563.8 | 14  |
| 7   | 742.4   | 371.7   |         | 724.4   | T  | 1,468.7 | 734.8   | 1,451.7 | 1,450.7 | 13  |
| 8   | 829.4   | 415.2   |         | 811.4   | S  | 1,367.6 | 684.3   | 1,350.6 | 1,349.6 | 12  |
| 9   | 916.5   | 458.7   |         | 898.5   | S  | 1,280.6 | 640.8   | 1,263.6 | 1,262.6 | 11  |
| 10  | 1,045.5 | 523.3   |         | 1,027.5 | E  | 1,193.6 | 597.3   | 1,176.5 | 1,175.6 | 10  |
| 11  | 1,174.5 | 587.8   |         | 1,156.5 | E  | 1,064.5 | 532.8   | 1,047.5 | 1,046.5 | 9   |
| 12  | 1,302.6 | 651.8   | 1,285.6 | 1,284.6 | K  | 935.5   | 468.2   | 918.5   | 917.5   | 8   |
| 13  | 1,399.7 | 700.4   | 1,382.7 | 1,381.7 | P  | 807.4   | 404.2   | 790.4   | 789.4   | 7   |
| 14  | 1,514.7 | 757.9   | 1,497.7 | 1,496.7 | D  | 710.3   | 355.7   | 693.3   | 692.3   | 6   |
| 15  | 1,613.8 | 807.4   | 1,596.8 | 1,595.8 | V  | 595.3   |         | 578.3   | 577.3   | 5   |
| 16  | 1,700.8 | 850.9   | 1,683.8 | 1,682.8 | S  | 496.2   |         | 479.2   | 478.2   | 4   |
| 17  | 1,847.9 | 924.4   | 1,830.9 | 1,829.9 | F  | 409.2   |         | 392.2   | 391.2   | 3   |
| 18  | 1,962.9 | 982.0   | 1,945.9 | 1,944.9 | D  | 262.1   |         | 245.1   | 244.1   | 2   |
| 19  | 2,109.0 | 1,055.0 | 2,092.0 | 2,091.0 | K  | 147.1   |         | 130.1   |         | 1   |

# Nuclear proteome

| Protein No. | Leading protein name | Sequence             | Mascot Score | Variable Modifications | SILAC State | Charge | m/z       |
|-------------|----------------------|----------------------|--------------|------------------------|-------------|--------|-----------|
| N-12        | spIP304991IC01_HUMAN | GYDQYAYDGKDYIALNEDLR | 105.42       | Unmodified             | Light       | 2      | 1191.5479 |

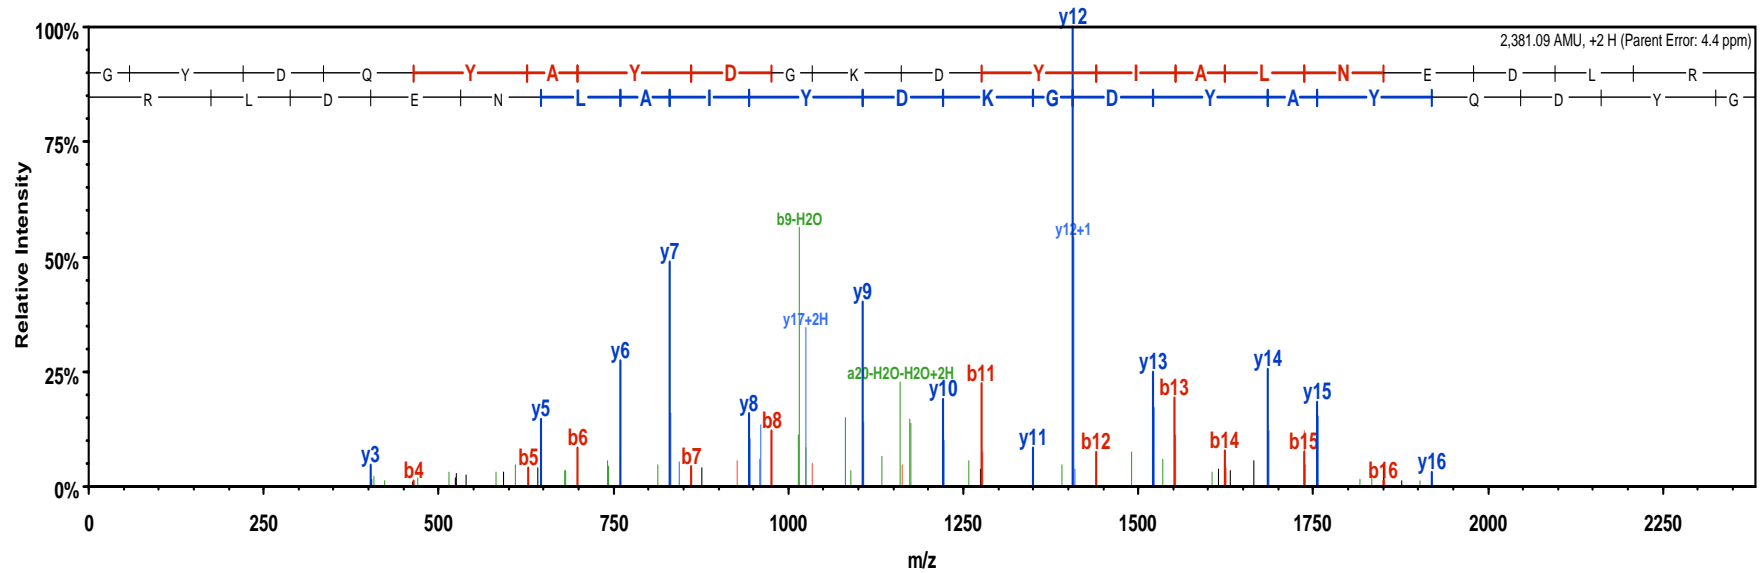

| ... | B Ions  | B+2H    | B-NH3   | B-H2O   | AA | Y Ions  | Y+2H    | Y-NH3   | Y-H2O   | ... |
|-----|---------|---------|---------|---------|----|---------|---------|---------|---------|-----|
| 1   | 58.0    |         |         |         | G  | 2,382.1 | 1,191.5 | 2,365.1 | 2,364.1 | 20  |
| 2   | 221.1   |         |         |         | Y  | 2,325.1 | 1,163.0 | 2,308.0 | 2,307.1 | 19  |
| 3   | 336.1   |         |         | 318.1   | D  | 2,162.0 | 1,081.5 | 2,145.0 | 2,144.0 | 18  |
| 4   | 464.2   |         | 447.2   | 446.2   | Q  | 2,047.0 | 1,024.0 | 2,030.0 | 2,029.0 | 17  |
| 5   | 627.2   |         | 610.2   | 609.2   | Y  | 1,918.9 | 960.0   | 1,901.9 | 1,900.9 | 16  |
| 6   | 698.3   | 349.6   | 681.3   | 680.3   | A  | 1,755.9 | 878.4   | 1,738.8 | 1,737.8 | 15  |
| 7   | 861.3   | 431.2   | 844.3   | 843.3   | Y  | 1,684.8 | 842.9   | 1,667.8 | 1,666.8 | 14  |
| 8   | 976.4   | 488.7   | 959.3   | 958.4   | D  | 1,521.8 | 761.4   | 1,504.7 | 1,503.7 | 13  |
| 9   | 1,033.4 | 517.2   | 1,016.4 | 1,015.4 | G  | 1,406.7 | 703.9   | 1,389.7 | 1,388.7 | 12  |
| 10  | 1,161.5 | 581.2   | 1,144.5 | 1,143.5 | K  | 1,349.7 | 675.4   | 1,332.7 | 1,331.7 | 11  |
| 11  | 1,276.5 | 638.8   | 1,259.5 | 1,258.5 | D  | 1,221.6 | 611.3   | 1,204.6 | 1,203.6 | 10  |
| 12  | 1,439.6 | 720.3   | 1,422.5 | 1,421.6 | Y  | 1,106.6 | 553.8   | 1,089.6 | 1,088.6 | 9   |
| 13  | 1,552.7 | 776.8   | 1,535.6 | 1,534.6 | I  | 943.5   | 472.3   | 926.5   | 925.5   | 8   |
| 14  | 1,623.7 | 812.4   | 1,606.7 | 1,605.7 | A  | 830.4   | 415.7   | 813.4   | 812.4   | 7   |
| 15  | 1,736.8 | 868.9   | 1,719.8 | 1,718.8 | L  | 759.4   | 380.2   | 742.4   | 741.4   | 6   |
| 16  | 1,850.8 | 925.9   | 1,833.8 | 1,832.8 | N  | 646.3   |         | 629.3   | 628.3   | 5   |
| 17  | 1,979.9 | 990.4   | 1,962.8 | 1,961.9 | E  | 532.3   |         | 515.2   | 514.3   | 4   |
| 18  | 2,094.9 | 1,048.0 | 2,077.9 | 2,076.9 | D  | 403.2   |         | 386.2   | 385.2   | 3   |
| 19  | 2,208.0 | 1,104.5 | 2,191.0 | 2,190.0 | L  | 288.2   |         | 271.2   |         | 2   |
| 20  | 2,382.1 | 1,191.5 | 2,365.1 | 2,364.1 | R  | 175.1   |         | 158.1   |         | 1   |

# Nuclear proteome

| Protein No. | Leading protein name  | Sequence                               | Mascot Score | Variable Modifications | SILAC State | Charge | m/z       |
|-------------|-----------------------|----------------------------------------|--------------|------------------------|-------------|--------|-----------|
| N-13        | sp Q9UQ88 CD2L2_HUMAN | EYSTA VDMW SVGCIFGELLTQKPLFPGNSEIDQINK | 98.7         | Unmodified             | Heavy       | 3      | 1362.9991 |

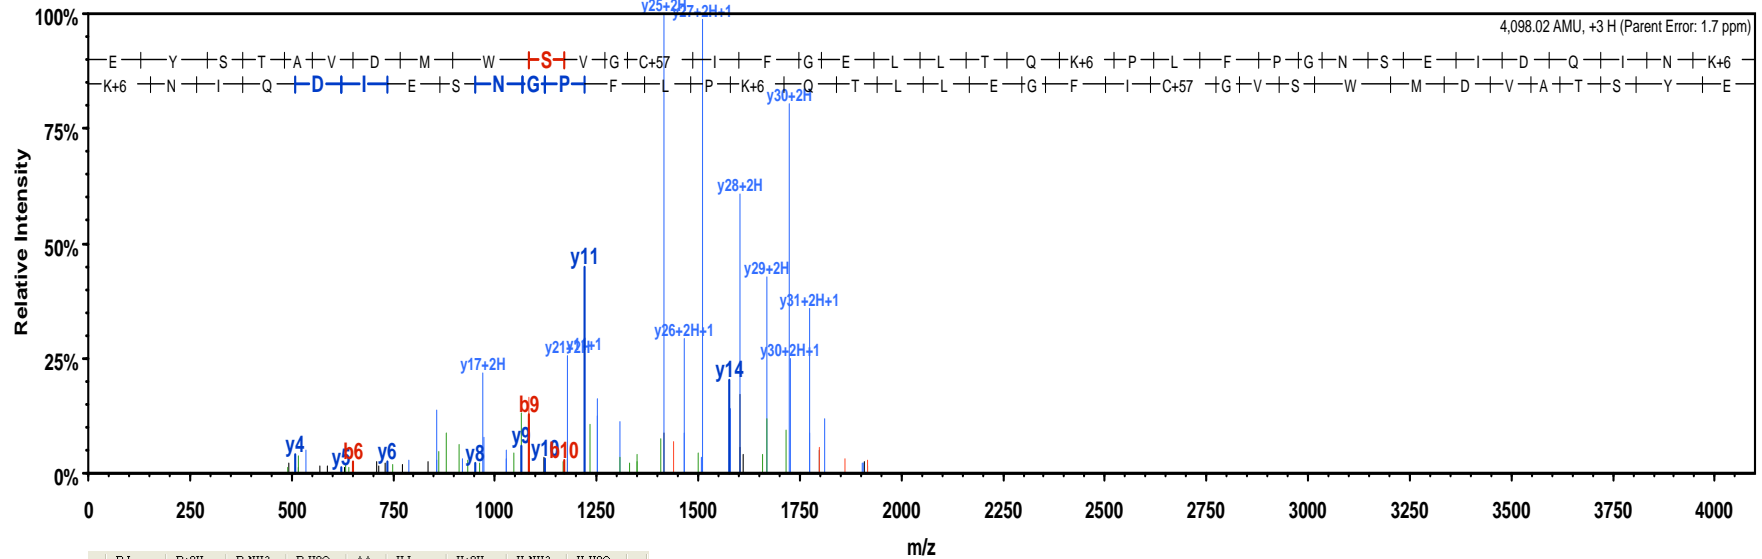

| ... | B Ions  | B+2H    | B-NH3   | B-H2O   | AA   | Y Ions  | Y+2H    | Y-NH3   | Y-H2O   | ... |
|-----|---------|---------|---------|---------|------|---------|---------|---------|---------|-----|
| 1   | 130.0   |         |         | 112.0   | E    | 4,099.0 | 2,050.0 | 4,082.0 | 4,081.0 | 36  |
| 2   | 293.1   |         |         | 275.1   | Y    | 3,970.0 | 1,985.5 | 3,953.0 | 3,952.0 | 35  |
| 3   | 380.1   |         |         | 362.1   | S    | 3,806.9 | 1,904.0 | 3,789.9 | 3,788.9 | 34  |
| 4   | 481.2   |         |         | 463.2   | T    | 3,719.9 | 1,860.4 | 3,702.9 | 3,701.9 | 33  |
| 5   | 552.2   |         |         | 534.2   | A    | 3,618.8 | 1,809.9 | 3,601.8 | 3,600.8 | 32  |
| 6   | 651.3   | 326.2   |         | 633.3   | V    | 3,547.8 | 1,774.4 | 3,530.8 | 3,529.8 | 31  |
| 7   | 766.3   | 383.7   |         | 748.3   | D    | 3,448.7 | 1,724.9 | 3,431.7 | 3,430.7 | 30  |
| 8   | 897.4   | 449.2   |         | 879.4   | M    | 3,333.7 | 1,667.4 | 3,316.7 | 3,315.7 | 29  |
| 9   | 1,083.4 | 542.2   |         | 1,065.4 | W    | 3,202.7 | 1,601.8 | 3,185.6 | 3,184.7 | 28  |
| 10  | 1,170.5 | 585.7   |         | 1,152.5 | S    | 3,016.6 | 1,508.8 | 2,999.6 | 2,998.6 | 27  |
| 11  | 1,269.5 | 635.3   |         | 1,251.5 | V    | 2,929.6 | 1,465.3 | 2,912.5 | 2,911.5 | 26  |
| 12  | 1,326.6 | 663.8   |         | 1,308.6 | G    | 2,830.5 | 1,415.7 | 2,813.5 | 2,812.5 | 25  |
| 13  | 1,486.6 | 743.8   |         | 1,468.6 | C+57 | 2,773.5 | 1,387.2 | 2,756.4 | 2,755.5 | 24  |
| 14  | 1,599.7 | 800.3   |         | 1,581.7 | I    | 2,613.4 | 1,307.2 | 2,596.4 | 2,595.4 | 23  |
| 15  | 1,746.8 | 873.9   |         | 1,728.7 | F    | 2,500.3 | 1,250.7 | 2,483.3 | 2,482.3 | 22  |
| 16  | 1,803.8 | 902.4   |         | 1,785.8 | G    | 2,353.3 | 1,177.1 | 2,336.3 | 2,335.3 | 21  |
| 17  | 1,932.8 | 966.9   |         | 1,914.8 | E    | 2,296.3 | 1,148.6 | 2,279.2 | 2,278.2 | 20  |
| 18  | 2,045.9 | 1,023.5 |         | 2,027.9 | L    | 2,167.2 | 1,084.1 | 2,150.2 | 2,149.2 | 19  |
| 19  | 2,159.0 | 1,080.0 |         | 2,141.0 | L    | 2,054.1 | 1,027.6 | 2,037.1 | 2,036.1 | 18  |
| 20  | 2,260.0 | 1,130.5 |         | 2,242.0 | T    | 1,941.0 | 971.0   | 1,924.0 | 1,923.0 | 17  |
| 21  | 2,388.1 | 1,194.5 | 2,371.1 | 2,370.1 | Q    | 1,840.0 | 920.5   | 1,823.0 | 1,822.0 | 16  |
| 22  | 2,522.2 | 1,261.6 | 2,505.2 | 2,504.2 | K+6  | 1,711.9 | 856.5   | 1,694.9 | 1,693.9 | 15  |
| 23  | 2,619.3 | 1,310.1 | 2,602.2 | 2,601.2 | P    | 1,577.8 | 789.4   | 1,560.8 | 1,559.8 | 14  |
| 24  | 2,732.3 | 1,366.7 | 2,715.3 | 2,714.3 | L    | 1,480.8 | 740.9   | 1,463.7 | 1,462.8 | 13  |
| 25  | 2,879.4 | 1,440.2 | 2,862.4 | 2,861.4 | F    | 1,367.7 | 684.3   | 1,350.7 | 1,349.7 | 12  |
| 26  | 2,976.5 | 1,488.7 | 2,959.4 | 2,958.5 | P    | 1,220.6 | 610.8   | 1,203.6 | 1,202.6 | 11  |
| 27  | 3,033.5 | 1,517.2 | 3,016.5 | 3,015.5 | G    | 1,123.6 | 562.3   | 1,106.5 | 1,105.6 | 10  |
| 28  | 3,147.5 | 1,574.3 | 3,130.5 | 3,129.5 | N    | 1,066.5 | 533.8   | 1,049.5 | 1,048.5 | 9   |
| 29  | 3,234.6 | 1,617.8 | 3,217.5 | 3,216.5 | S    | 952.5   | 476.8   | 935.5   | 934.5   | 8   |
| 30  | 3,363.6 | 1,682.3 | 3,346.6 | 3,345.6 | E    | 865.5   | 433.2   | 848.4   | 847.5   | 7   |
| 31  | 3,476.7 | 1,738.8 | 3,459.7 | 3,458.7 | I    | 736.4   | 368.7   | 719.4   | 718.4   | 6   |
| 32  | 3,591.7 | 1,796.4 | 3,574.7 | 3,573.7 | D    | 623.3   |         | 606.3   | 605.3   | 5   |
| 33  | 3,719.8 | 1,860.4 | 3,702.7 | 3,701.8 | Q    | 508.3   |         | 491.3   |         | 4   |
| 34  | 3,832.9 | 1,916.9 | 3,815.8 | 3,814.8 | I    | 380.3   |         | 363.2   |         | 3   |
| 35  | 3,946.9 | 1,974.0 | 3,929.9 | 3,928.9 | N    | 267.2   |         | 250.1   |         | 2   |
| 36  | 4,099.0 | 2,050.0 | 4,082.0 | 4,081.0 | K+6  | 153.1   |         | 136.1   |         | 1   |

# Nuclear proteome

| Protein No. | Leading protein name  | Sequence          | Mascot Score | Variable Modifications  | SILAC State | Charge | m/z       |
|-------------|-----------------------|-------------------|--------------|-------------------------|-------------|--------|-----------|
| N-14        | sp P06703 S10A6_HUMAN | ACPLDQAIGLLVAIFHK | 98.61        | Acetyl (Protein N-term) | Light       | 2      | 954.52422 |

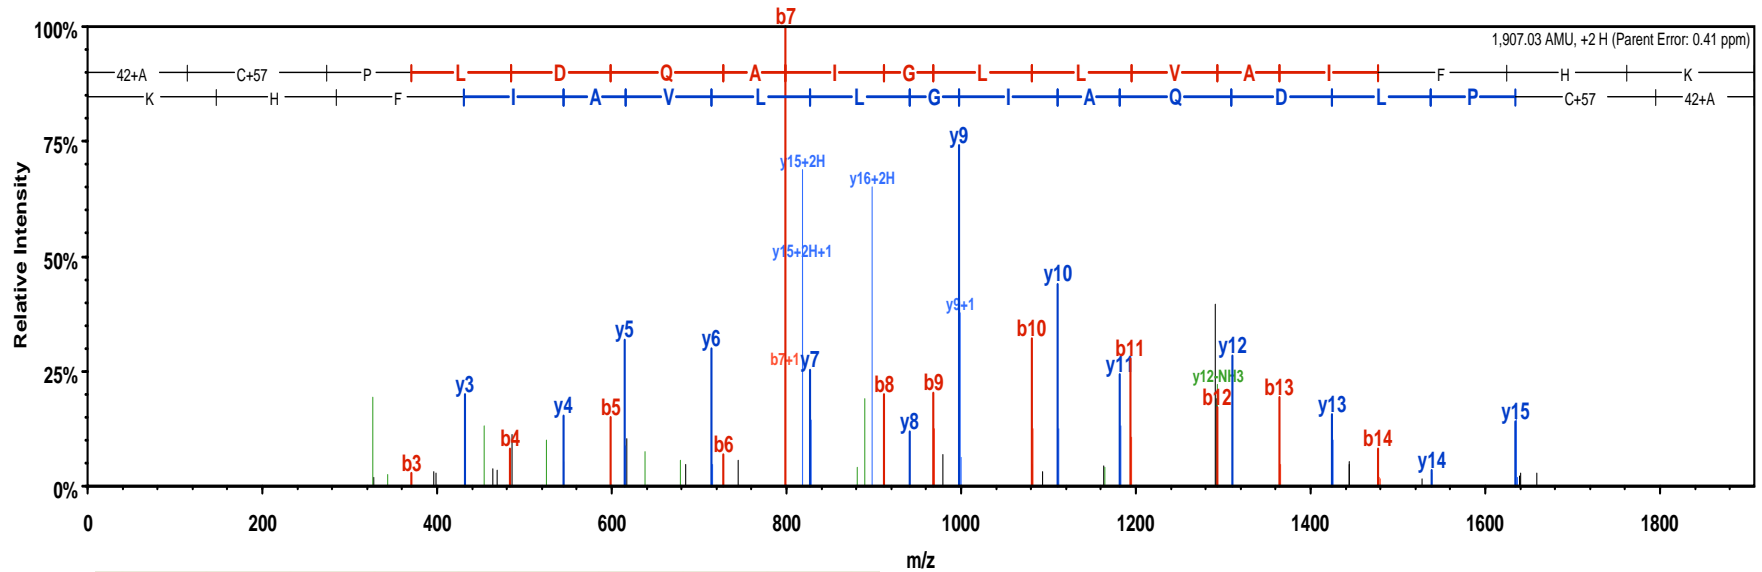

| ... | B Ions  | B+2H  | B-NH3   | B-H2O   | AA   | Y Ions  | Y+2H  | Y-NH3   | Y-H2O   | ... |
|-----|---------|-------|---------|---------|------|---------|-------|---------|---------|-----|
| 1   | 114.1   |       |         |         | A+42 | 1,908.0 | 954.5 | 1,891.0 | 1,890.0 | 17  |
| 2   | 274.1   |       |         |         | C+57 | 1,795.0 | 898.0 | 1,778.0 | 1,777.0 | 16  |
| 3   | 371.1   |       |         |         | P    | 1,635.0 | 818.0 | 1,617.9 | 1,617.0 | 15  |
| 4   | 484.2   |       |         |         | L    | 1,537.9 | 769.5 | 1,520.9 | 1,519.9 | 14  |
| 5   | 599.2   |       |         | 581.2   | D    | 1,424.8 | 712.9 | 1,407.8 | 1,406.8 | 13  |
| 6   | 727.3   | 364.2 | 710.3   | 709.3   | Q    | 1,309.8 | 655.4 | 1,292.8 |         | 12  |
| 7   | 798.3   | 399.7 | 781.3   | 780.3   | A    | 1,181.7 | 591.4 | 1,164.7 |         | 11  |
| 8   | 911.4   | 456.2 | 894.4   | 893.4   | I    | 1,110.7 | 555.9 | 1,093.7 |         | 10  |
| 9   | 968.5   | 484.7 | 951.4   | 950.4   | G    | 997.6   | 499.3 | 980.6   |         | 9   |
| 10  | 1,081.5 | 541.3 | 1,064.5 | 1,063.5 | L    | 940.6   | 470.8 | 923.6   |         | 8   |
| 11  | 1,194.6 | 597.8 | 1,177.6 | 1,176.6 | L    | 827.5   | 414.3 | 810.5   |         | 7   |
| 12  | 1,293.7 | 647.3 | 1,276.7 | 1,275.7 | V    | 714.4   | 357.7 | 697.4   |         | 6   |
| 13  | 1,364.7 | 682.9 | 1,347.7 | 1,346.7 | A    | 615.4   | 308.2 | 598.3   |         | 5   |
| 14  | 1,477.8 | 739.4 | 1,460.8 | 1,459.8 | I    | 544.3   | 272.7 | 527.3   |         | 4   |
| 15  | 1,624.9 | 812.9 | 1,607.9 | 1,606.9 | F    | 431.2   | 216.1 | 414.2   |         | 3   |
| 16  | 1,761.9 | 881.5 | 1,744.9 | 1,743.9 | H    | 284.2   | 142.6 | 267.1   |         | 2   |
| 17  | 1,908.0 | 954.5 | 1,891.0 | 1,890.0 | K    | 147.1   |       | 130.1   |         | 1   |

# Nuclear proteome

| Protein No. | Leading protein name  | Sequence                | Mascot Score | Variable Modifications | SILAC State | Charge | m/z       |
|-------------|-----------------------|-------------------------|--------------|------------------------|-------------|--------|-----------|
| N-15        | sp P06746 DPOLB_HUMAN | GAESSGDMDVLLTHPSFTSESTK | 97.77        | Unmodified             | Light       | 2      | 1198.5497 |

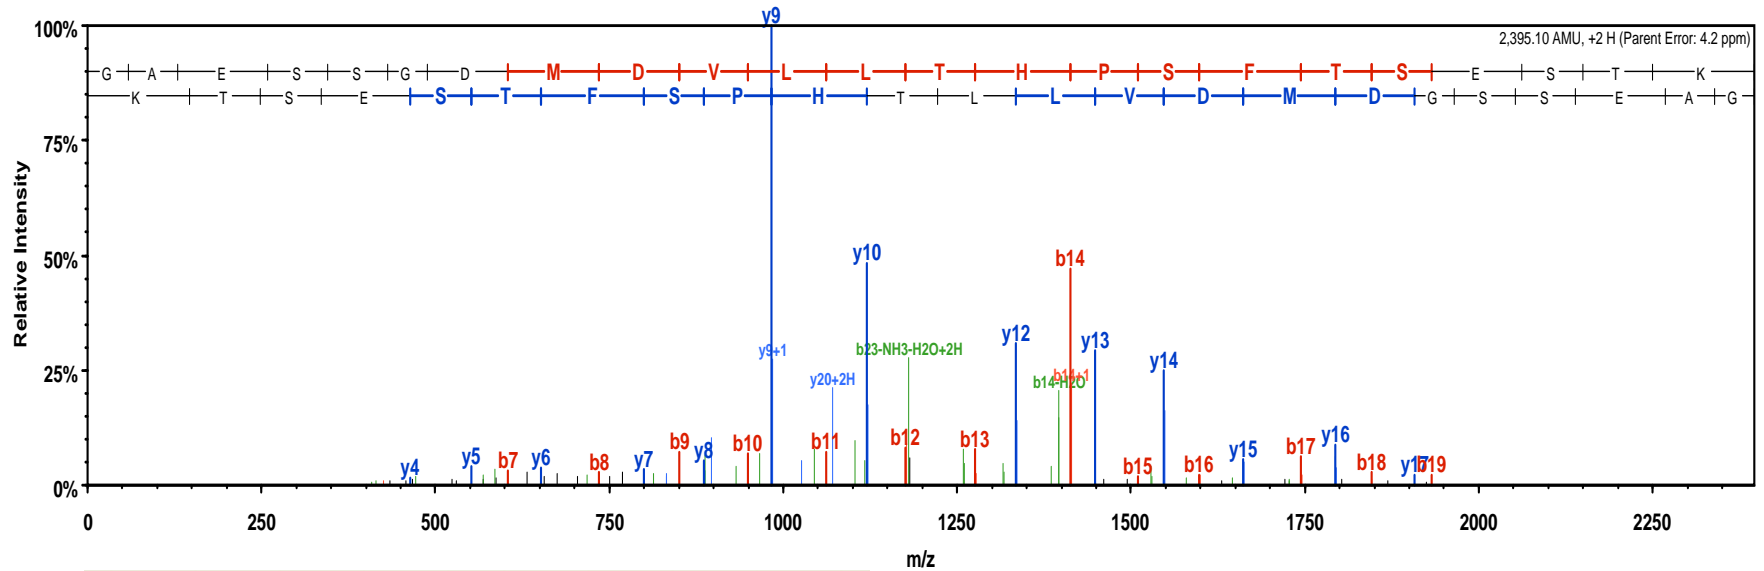

| ... | B Ions  | B+2H    | B-NH3   | B-H2O   | AA | Y Ions  | Y+2H    | Y-NH3   | Y-H2O   | ... |
|-----|---------|---------|---------|---------|----|---------|---------|---------|---------|-----|
| 1   | 58.0    |         |         |         | G  | 2,396.1 | 1,198.5 | 2,379.1 | 2,378.1 | 23  |
| 2   | 129.1   |         |         |         | A  | 2,339.1 | 1,170.0 | 2,322.0 | 2,321.1 | 22  |
| 3   | 258.1   |         |         | 240.1   | E  | 2,268.0 | 1,134.5 | 2,251.0 | 2,250.0 | 21  |
| 4   | 345.1   |         |         | 327.1   | S  | 2,139.0 | 1,070.0 | 2,122.0 | 2,121.0 | 20  |
| 5   | 432.2   |         |         | 414.2   | S  | 2,052.0 | 1,026.5 | 2,034.9 | 2,033.9 | 19  |
| 6   | 489.2   | 245.1   |         | 471.2   | G  | 1,964.9 | 983.0   | 1,947.9 | 1,946.9 | 18  |
| 7   | 604.2   | 302.6   |         | 586.2   | D  | 1,907.9 | 954.5   | 1,890.9 | 1,889.9 | 17  |
| 8   | 735.3   | 368.1   |         | 717.3   | M  | 1,792.9 | 896.9   | 1,775.9 | 1,774.9 | 16  |
| 9   | 850.3   | 425.6   |         | 832.3   | D  | 1,661.8 | 831.4   | 1,644.8 | 1,643.8 | 15  |
| 10  | 949.4   | 475.2   |         | 931.3   | V  | 1,546.8 | 773.9   | 1,529.8 | 1,528.8 | 14  |
| 11  | 1,062.4 | 531.7   |         | 1,044.4 | L  | 1,447.7 | 724.4   | 1,430.7 | 1,429.7 | 13  |
| 12  | 1,175.5 | 588.3   |         | 1,157.5 | L  | 1,334.7 | 667.8   | 1,317.6 | 1,316.6 | 12  |
| 13  | 1,276.6 | 638.8   |         | 1,258.6 | T  | 1,221.6 | 611.3   | 1,204.5 | 1,203.6 | 11  |
| 14  | 1,413.6 | 707.3   |         | 1,395.6 | H  | 1,120.5 | 560.8   | 1,103.5 | 1,102.5 | 10  |
| 15  | 1,510.7 | 755.8   |         | 1,492.7 | P  | 983.5   | 492.2   | 966.4   | 965.5   | 9   |
| 16  | 1,597.7 | 799.4   |         | 1,579.7 | S  | 886.4   | 443.7   | 869.4   | 868.4   | 8   |
| 17  | 1,744.8 | 872.9   |         | 1,726.8 | F  | 799.4   | 400.2   | 782.4   | 781.4   | 7   |
| 18  | 1,845.8 | 923.4   |         | 1,827.8 | T  | 652.3   | 326.7   | 635.3   | 634.3   | 6   |
| 19  | 1,932.9 | 966.9   |         | 1,914.9 | S  | 551.3   |         | 534.2   | 533.3   | 5   |
| 20  | 2,061.9 | 1,031.5 |         | 2,043.9 | E  | 464.2   |         | 447.2   | 446.2   | 4   |
| 21  | 2,148.9 | 1,075.0 |         | 2,130.9 | S  | 335.2   |         | 318.2   | 317.2   | 3   |
| 22  | 2,250.0 | 1,125.5 |         | 2,232.0 | T  | 248.2   |         | 231.1   | 230.1   | 2   |
| 23  | 2,396.1 | 1,198.5 | 2,379.1 | 2,378.1 | K  | 147.1   |         | 130.1   |         | 1   |



# Nuclear proteome

| Protein No. | Leading protein name | Sequence                         | Mascot Score | Variable Modifications | SILAC State | Charge | m/z      |
|-------------|----------------------|----------------------------------|--------------|------------------------|-------------|--------|----------|
| N-16        | sp P84243 H33_HUMAN  | FQSA AIGALQEASEAYLVGLFEDTNLCAIHK | 97.26        | Unmodified             | Heavy       | 3      | 1146.573 |

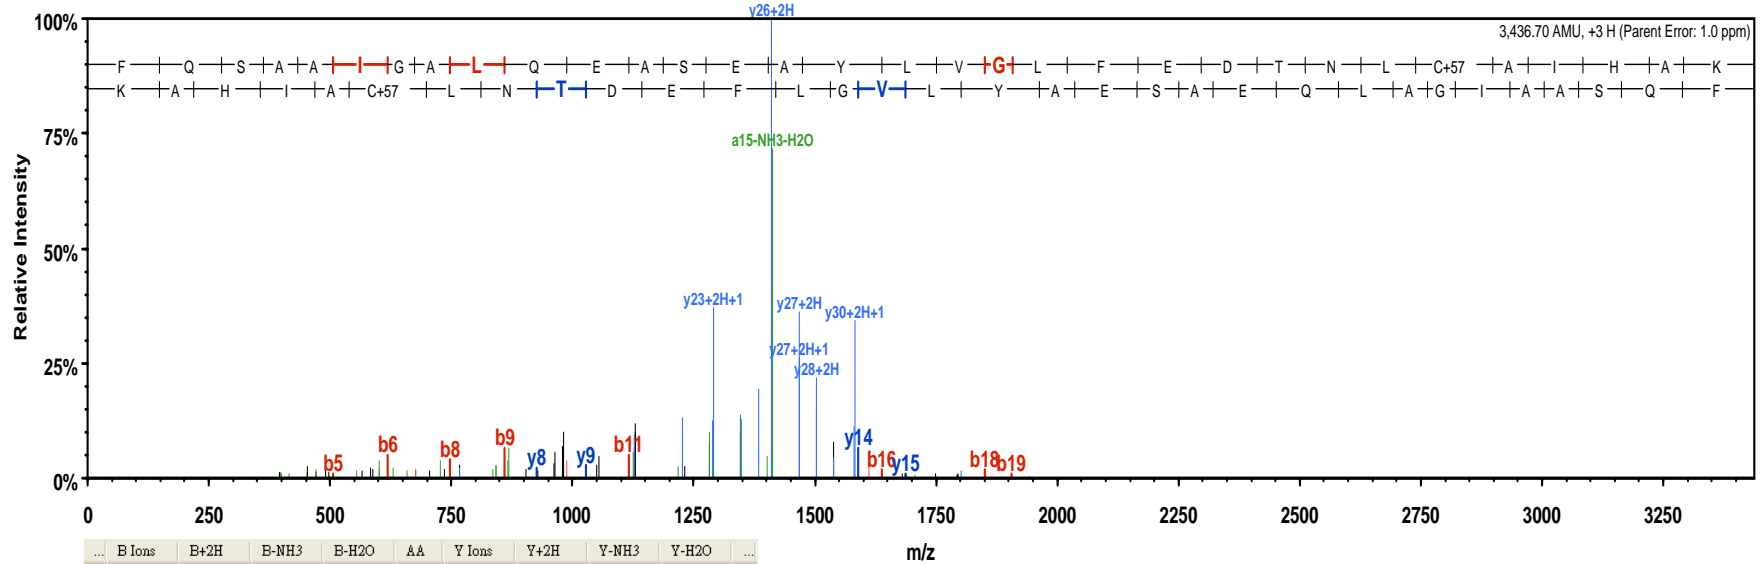

| ... | B Ions  | B+2H    | B-NH3   | B-H2O   | AA   | Y Ions  | Y+2H    | Y-NH3   | Y-H2O   | ... |
|-----|---------|---------|---------|---------|------|---------|---------|---------|---------|-----|
| 1   | 148.1   |         |         |         | F    | 3,443.7 | 1,722.4 | 3,426.7 | 3,425.7 | 32  |
| 2   | 276.1   |         | 259.1   |         | Q    | 3,296.7 | 1,648.8 | 3,279.6 | 3,278.6 | 31  |
| 3   | 363.2   |         | 346.1   | 345.2   | S    | 3,168.6 | 1,584.8 | 3,151.6 | 3,150.6 | 30  |
| 4   | 434.2   |         | 417.2   | 416.2   | A    | 3,081.6 | 1,541.3 | 3,064.5 | 3,063.6 | 29  |
| 5   | 505.2   |         | 488.2   | 487.2   | A    | 3,010.5 | 1,505.8 | 2,993.5 | 2,992.5 | 28  |
| 6   | 618.3   | 309.7   | 601.3   | 600.3   | I    | 2,939.5 | 1,470.2 | 2,922.5 | 2,921.5 | 27  |
| 7   | 675.3   | 338.2   | 658.3   | 657.3   | G    | 2,826.4 | 1,413.7 | 2,809.4 | 2,808.4 | 26  |
| 8   | 746.4   | 373.7   | 729.4   | 728.4   | A    | 2,769.4 | 1,385.2 | 2,752.4 | 2,751.4 | 25  |
| 9   | 859.5   | 430.2   | 842.4   | 841.5   | L    | 2,698.3 | 1,349.7 | 2,681.3 | 2,680.3 | 24  |
| 10  | 987.5   | 494.3   | 970.5   | 969.5   | Q    | 2,585.3 | 1,293.1 | 2,568.2 | 2,567.3 | 23  |
| 11  | 1,116.6 | 558.8   | 1,099.5 | 1,098.6 | E    | 2,457.2 | 1,229.1 | 2,440.2 | 2,439.2 | 22  |
| 12  | 1,187.6 | 594.3   | 1,170.6 | 1,169.6 | A    | 2,328.2 | 1,164.6 | 2,311.1 | 2,310.2 | 21  |
| 13  | 1,274.6 | 637.8   | 1,257.6 | 1,256.6 | S    | 2,257.1 | 1,129.1 | 2,240.1 | 2,239.1 | 20  |
| 14  | 1,403.7 | 702.3   | 1,386.7 | 1,385.7 | E    | 2,170.1 | 1,085.6 | 2,153.1 | 2,152.1 | 19  |
| 15  | 1,474.7 | 737.9   | 1,457.7 | 1,456.7 | A    | 2,041.1 | 1,021.0 | 2,024.0 | 2,023.0 | 18  |
| 16  | 1,637.8 | 819.4   | 1,620.8 | 1,619.8 | Y    | 1,970.0 | 985.5   | 1,953.0 | 1,952.0 | 17  |
| 17  | 1,750.9 | 875.9   | 1,733.8 | 1,732.9 | L    | 1,807.0 | 904.0   | 1,789.9 | 1,788.9 | 16  |
| 18  | 1,849.9 | 925.5   | 1,832.9 | 1,831.9 | V    | 1,693.9 | 847.4   | 1,676.8 | 1,675.9 | 15  |
| 19  | 1,907.0 | 954.0   | 1,889.9 | 1,888.9 | G    | 1,594.8 | 797.9   | 1,577.8 | 1,576.8 | 14  |
| 20  | 2,020.0 | 1,010.5 | 2,003.0 | 2,002.0 | L    | 1,537.8 | 769.4   | 1,520.8 | 1,519.8 | 13  |
| 21  | 2,167.1 | 1,084.1 | 2,150.1 | 2,149.1 | F    | 1,424.7 | 712.9   | 1,407.7 | 1,406.7 | 12  |
| 22  | 2,296.1 | 1,148.6 | 2,279.1 | 2,278.1 | E    | 1,277.6 | 639.3   | 1,260.6 | 1,259.6 | 11  |
| 23  | 2,411.2 | 1,206.1 | 2,394.1 | 2,393.2 | D    | 1,148.6 | 574.8   | 1,131.6 | 1,130.6 | 10  |
| 24  | 2,512.2 | 1,256.6 | 2,495.2 | 2,494.2 | T    | 1,033.6 | 517.3   | 1,016.5 | 1,015.5 | 9   |
| 25  | 2,626.3 | 1,313.6 | 2,609.2 | 2,608.3 | N    | 932.5   | 466.8   | 915.5   |         | 8   |
| 26  | 2,739.4 | 1,370.2 | 2,722.3 | 2,721.3 | L    | 818.5   | 409.7   | 801.4   |         | 7   |
| 27  | 2,899.4 | 1,450.2 | 2,882.4 | 2,881.4 | C+57 | 705.4   | 353.2   | 688.4   |         | 6   |
| 28  | 2,970.4 | 1,485.7 | 2,953.4 | 2,952.4 | A    | 545.4   | 273.2   | 528.3   |         | 5   |
| 29  | 3,083.5 | 1,542.3 | 3,066.5 | 3,065.5 | I    | 474.3   | 237.7   | 457.3   |         | 4   |
| 30  | 3,220.6 | 1,610.8 | 3,203.5 | 3,202.6 | H    | 361.2   | 181.1   | 344.2   |         | 3   |
| 31  | 3,291.6 | 1,646.3 | 3,274.6 | 3,273.6 | A    | 224.2   |         | 207.1   |         | 2   |
| 32  | 3,443.7 | 1,722.4 | 3,426.7 | 3,425.7 | K+6  | 153.1   |         | 136.1   |         | 1   |

# Nuclear proteome

| Protein No. | Leading protein name  | Sequence           | Mascot Score | Variable Modifications | SILAC State | Charge | m/z       |
|-------------|-----------------------|--------------------|--------------|------------------------|-------------|--------|-----------|
| N-17        | spIP40855IPEX19_HUMAN | ICEQFEAETPTDSETTQK | 96.34        | Unmodified             | Heavy       | 2      | 1057.4651 |

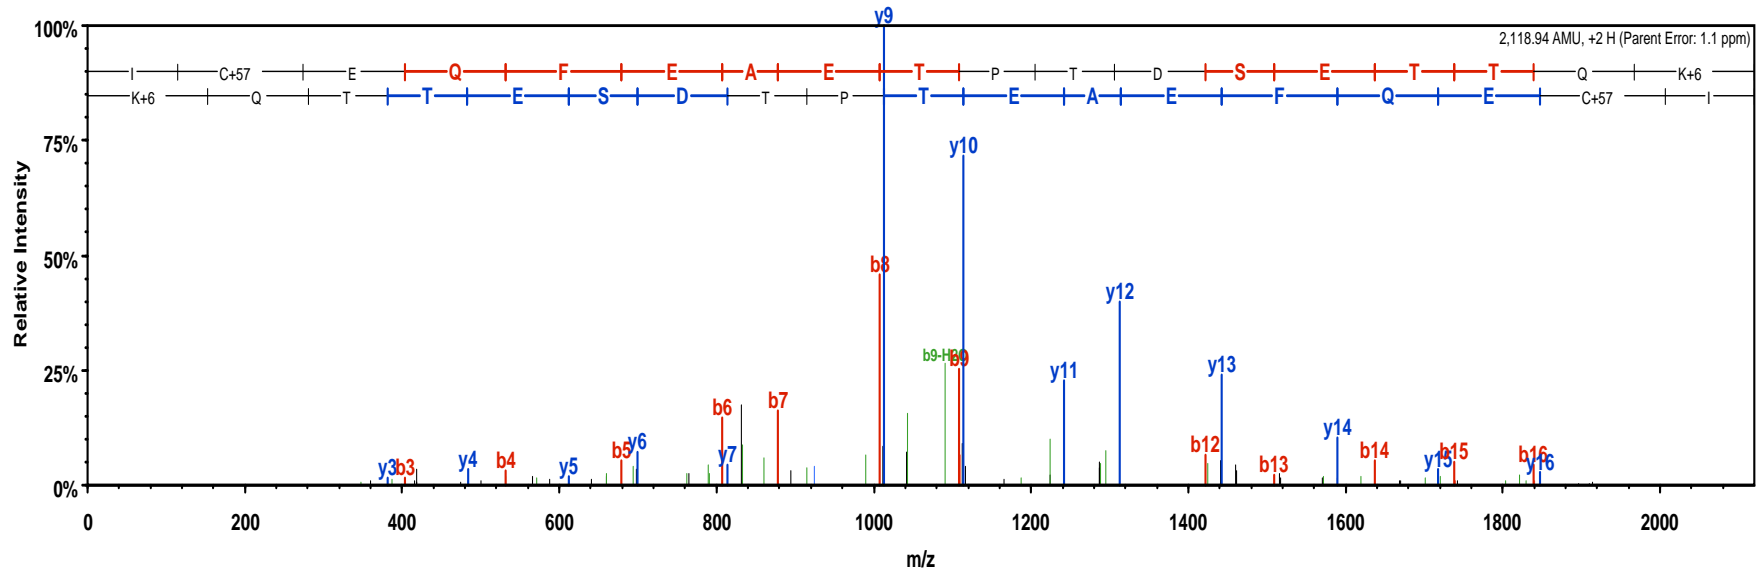

| ... | B Ions  | B+2H    | B-NH3   | B-H2O   | AA   | Y Ions  | Y+2H    | Y-NH3   | Y-H2O   | ... |
|-----|---------|---------|---------|---------|------|---------|---------|---------|---------|-----|
| 1   | 114.1   |         |         |         | I    | 2,119.9 | 1,060.5 | 2,102.9 | 2,101.9 | 18  |
| 2   | 274.1   |         |         |         | C+57 | 2,006.9 | 1,003.9 | 1,989.8 | 1,988.8 | 17  |
| 3   | 403.2   |         |         | 385.2   | E    | 1,846.8 | 923.9   | 1,829.8 | 1,828.8 | 16  |
| 4   | 531.2   |         | 514.2   | 513.2   | Q    | 1,717.8 | 859.4   | 1,700.8 | 1,699.8 | 15  |
| 5   | 678.3   |         | 661.3   | 660.3   | F    | 1,589.7 | 795.4   | 1,572.7 | 1,571.7 | 14  |
| 6   | 807.3   | 404.2   | 790.3   | 789.3   | E    | 1,442.7 | 721.8   | 1,425.6 | 1,424.6 | 13  |
| 7   | 878.4   | 439.7   | 861.3   | 860.4   | A    | 1,313.6 | 657.3   | 1,296.6 | 1,295.6 | 12  |
| 8   | 1,007.4 | 504.2   | 990.4   | 989.4   | E    | 1,242.6 | 621.8   | 1,225.6 | 1,224.6 | 11  |
| 9   | 1,108.5 | 554.7   | 1,091.4 | 1,090.5 | T    | 1,113.5 | 557.3   | 1,096.5 | 1,095.5 | 10  |
| 10  | 1,205.5 | 603.3   | 1,188.5 | 1,187.5 | P    | 1,012.5 | 506.7   | 995.5   | 994.5   | 9   |
| 11  | 1,306.6 | 653.8   | 1,289.5 | 1,288.6 | T    | 915.4   | 458.2   | 898.4   | 897.4   | 8   |
| 12  | 1,421.6 | 711.3   | 1,404.6 | 1,403.6 | D    | 814.4   | 407.7   | 797.4   | 796.4   | 7   |
| 13  | 1,508.6 | 754.8   | 1,491.6 | 1,490.6 | S    | 699.4   | 350.2   | 682.3   | 681.4   | 6   |
| 14  | 1,637.7 | 819.3   | 1,620.6 | 1,619.7 | E    | 612.3   |         | 595.3   | 594.3   | 5   |
| 15  | 1,738.7 | 869.9   | 1,721.7 | 1,720.7 | T    | 483.3   |         | 466.3   | 465.3   | 4   |
| 16  | 1,839.8 | 920.4   | 1,822.7 | 1,821.7 | T    | 382.2   |         | 365.2   | 364.2   | 3   |
| 17  | 1,967.8 | 984.4   | 1,950.8 | 1,949.8 | Q    | 281.2   |         | 264.2   |         | 2   |
| 18  | 2,119.9 | 1,060.5 | 2,102.9 | 2,101.9 | K+6  | 153.1   |         | 136.1   |         | 1   |

# Nuclear proteome

| Protein No. | Leading protein name | Sequence        | Mascot Score | Variable Modifications | SILAC State | Charge | m/z       |
|-------------|----------------------|-----------------|--------------|------------------------|-------------|--------|-----------|
| N-18        | sp P47914 RL29_HUMAN | AQAAAPASVPAQAPK | 95.7         | Unmodified             | Heavy       | 2      | 689.37788 |

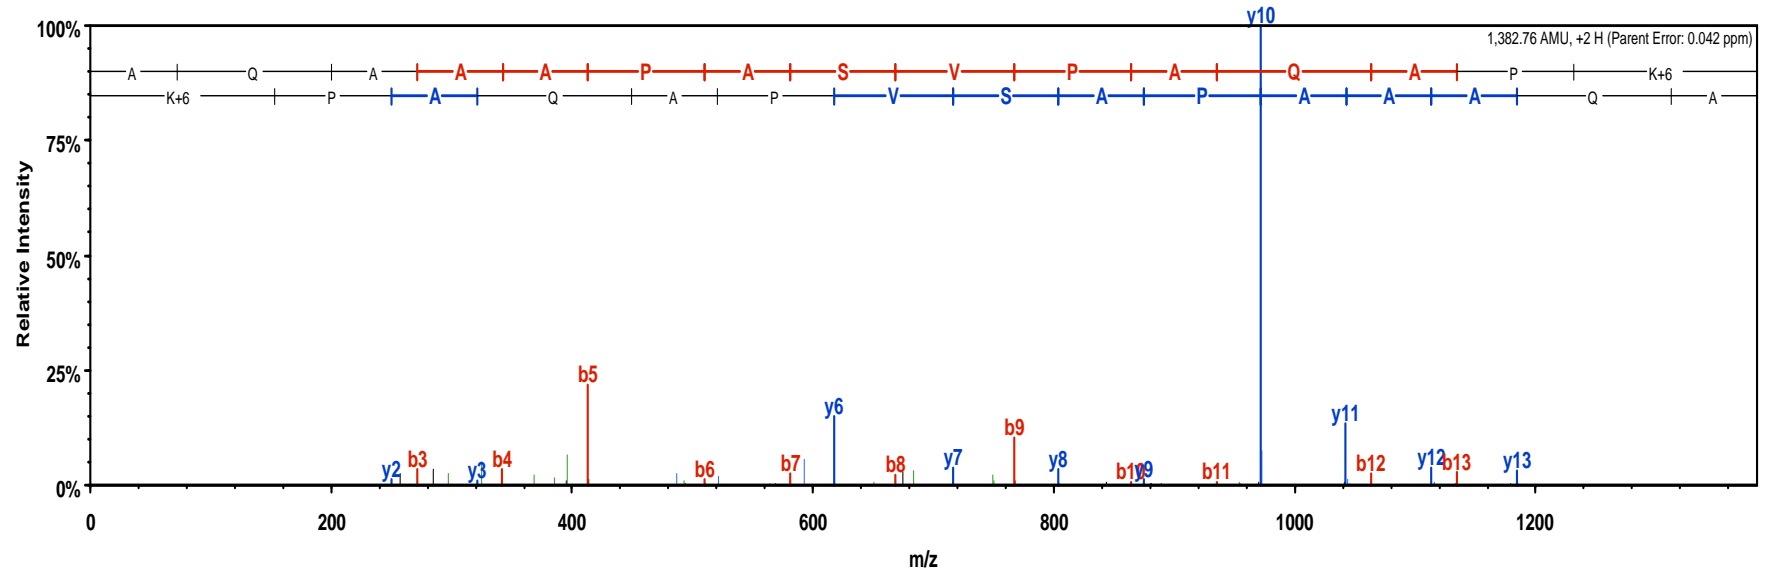

| ... | B Ions  | B+2H  | B-NH3   | B-H2O   | AA  | Y Ions  | Y+2H  | Y-NH3   | Y-H2O   | ... |
|-----|---------|-------|---------|---------|-----|---------|-------|---------|---------|-----|
| 1   | 72.0    |       |         |         | A   | 1,383.8 | 692.4 | 1,366.7 | 1,365.8 | 15  |
| 2   | 200.1   |       | 183.1   |         | Q   | 1,312.7 | 656.9 | 1,295.7 | 1,294.7 | 14  |
| 3   | 271.1   |       | 254.1   |         | A   | 1,184.7 | 592.8 | 1,167.6 | 1,166.7 | 13  |
| 4   | 342.2   |       | 325.2   |         | A   | 1,113.6 | 557.3 | 1,096.6 | 1,095.6 | 12  |
| 5   | 413.2   |       | 396.2   |         | A   | 1,042.6 | 521.8 | 1,025.6 | 1,024.6 | 11  |
| 6   | 510.3   | 255.6 | 493.2   |         | P   | 971.6   | 486.3 | 954.5   | 953.6   | 10  |
| 7   | 581.3   | 291.2 | 564.3   |         | A   | 874.5   | 437.8 | 857.5   | 856.5   | 9   |
| 8   | 668.3   | 334.7 | 651.3   | 650.3   | S   | 803.5   | 402.2 | 786.4   | 785.5   | 8   |
| 9   | 767.4   | 384.2 | 750.4   | 749.4   | V   | 716.4   | 358.7 | 699.4   |         | 7   |
| 10  | 864.5   | 432.7 | 847.4   | 846.4   | P   | 617.4   | 309.2 | 600.3   |         | 6   |
| 11  | 935.5   | 468.3 | 918.5   | 917.5   | A   | 520.3   |       | 503.3   |         | 5   |
| 12  | 1,063.6 | 532.3 | 1,046.5 | 1,045.5 | Q   | 449.3   |       | 432.3   |         | 4   |
| 13  | 1,134.6 | 567.8 | 1,117.6 | 1,116.6 | A   | 321.2   |       | 304.2   |         | 3   |
| 14  | 1,231.6 | 616.3 | 1,214.6 | 1,213.6 | P   | 250.2   |       | 233.2   |         | 2   |
| 15  | 1,383.8 | 692.4 | 1,366.7 | 1,365.8 | K+6 | 153.1   |       | 136.1   |         | 1   |

# Nuclear proteome

| Protein No. | Leading protein name  | Sequence                       | Mascot Score | Variable Modifications | SILAC State | Charge | m/z       |
|-------------|-----------------------|--------------------------------|--------------|------------------------|-------------|--------|-----------|
| N-19        | sp Q9BW62 KATL1_HUMAN | EVELDPDIQLEDIAEKIEGYSGADITNVCR | 94.96        | Unmodified             | Light       | 3      | 1131.2118 |

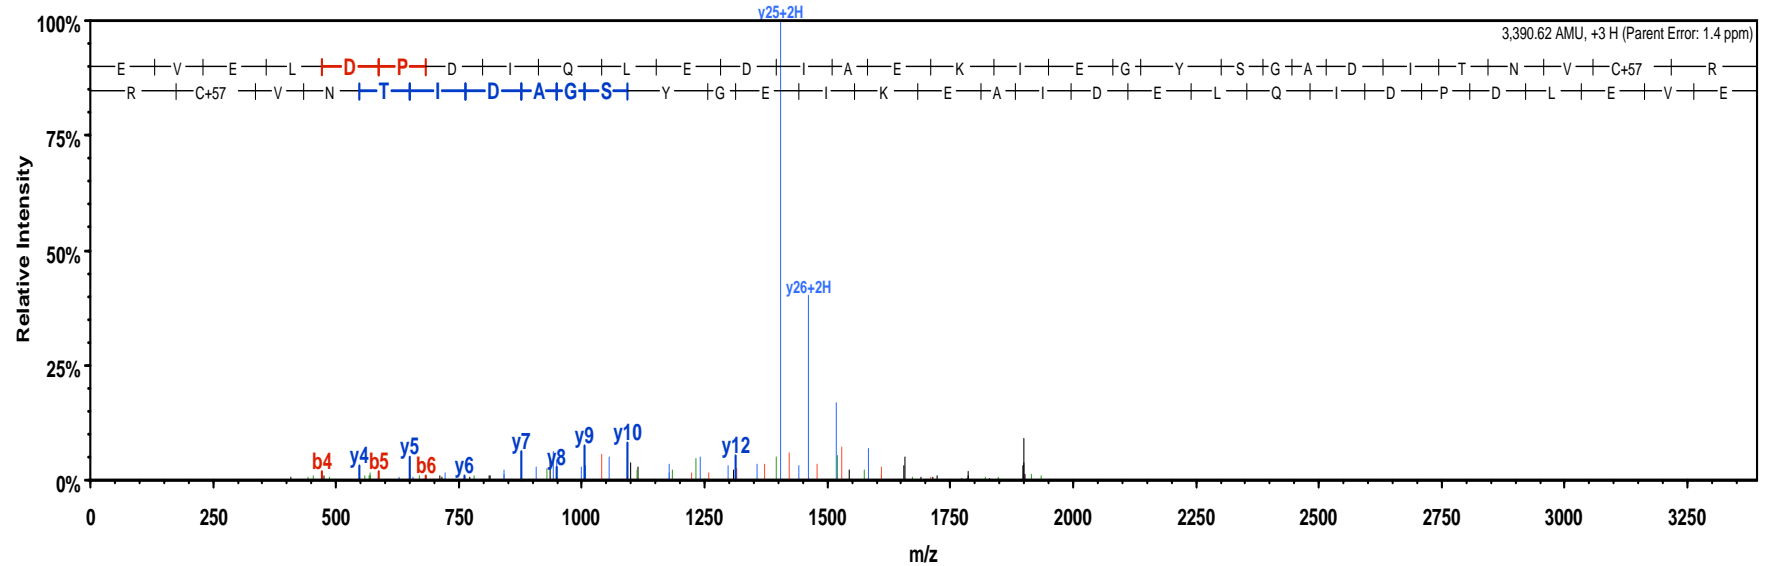

| ... | E Ions  | B+2H    | B-NH3   | B-H2O   | AA   | Y Ions  | Y+2H    | Y-NH3   | Y-H2O   | ... |
|-----|---------|---------|---------|---------|------|---------|---------|---------|---------|-----|
| 1   | 130.0   |         |         | 112.0   | E    | 3,391.6 | 1,696.3 | 3,374.6 | 3,373.6 | 30  |
| 2   | 229.1   |         |         | 211.1   | V    | 3,262.6 | 1,631.8 | 3,245.6 | 3,244.6 | 29  |
| 3   | 358.2   |         |         | 340.2   | E    | 3,163.5 | 1,582.3 | 3,146.5 | 3,145.5 | 28  |
| 4   | 471.2   |         |         | 453.2   | L    | 3,034.5 | 1,517.7 | 3,017.4 | 3,016.5 | 27  |
| 5   | 586.3   |         |         | 568.3   | D    | 2,921.4 | 1,461.2 | 2,904.4 | 2,903.4 | 26  |
| 6   | 683.3   | 342.2   |         | 665.3   | P    | 2,806.4 | 1,403.7 | 2,789.3 | 2,788.3 | 25  |
| 7   | 798.4   | 399.7   |         | 780.3   | D    | 2,709.3 | 1,355.2 | 2,692.3 | 2,691.3 | 24  |
| 8   | 911.4   | 456.2   |         | 893.4   | I    | 2,594.3 | 1,297.6 | 2,577.3 | 2,576.3 | 23  |
| 9   | 1,039.5 | 520.3   | 1,022.5 | 1,021.5 | Q    | 2,481.2 | 1,241.1 | 2,464.2 | 2,463.2 | 22  |
| 10  | 1,152.6 | 576.8   | 1,135.6 | 1,134.6 | L    | 2,353.1 | 1,177.1 | 2,336.1 | 2,335.1 | 21  |
| 11  | 1,281.6 | 641.3   | 1,264.6 | 1,263.6 | E    | 2,240.1 | 1,120.5 | 2,223.0 | 2,222.0 | 20  |
| 12  | 1,396.6 | 698.8   | 1,379.6 | 1,378.6 | D    | 2,111.0 | 1,056.0 | 2,094.0 | 2,093.0 | 19  |
| 13  | 1,509.7 | 755.4   | 1,492.7 | 1,491.7 | I    | 1,996.0 | 998.5   | 1,979.0 | 1,978.0 | 18  |
| 14  | 1,580.8 | 790.9   | 1,563.7 | 1,562.8 | A    | 1,882.9 | 942.0   | 1,865.9 | 1,864.9 | 17  |
| 15  | 1,709.8 | 855.4   | 1,692.8 | 1,691.8 | E    | 1,811.9 | 906.4   | 1,794.8 | 1,793.8 | 16  |
| 16  | 1,837.9 | 919.5   | 1,820.9 | 1,819.9 | K    | 1,682.8 | 841.9   | 1,665.8 | 1,664.8 | 15  |
| 17  | 1,951.0 | 976.0   | 1,934.0 | 1,933.0 | I    | 1,554.7 | 777.9   | 1,537.7 | 1,536.7 | 14  |
| 18  | 2,080.0 | 1,040.5 | 2,063.0 | 2,062.0 | E    | 1,441.6 | 721.3   | 1,424.6 | 1,423.6 | 13  |
| 19  | 2,137.1 | 1,069.0 | 2,120.0 | 2,119.0 | G    | 1,312.6 | 656.8   | 1,295.6 | 1,294.6 | 12  |
| 20  | 2,300.1 | 1,150.6 | 2,283.1 | 2,282.1 | Y    | 1,255.6 | 628.3   | 1,238.5 | 1,237.6 | 11  |
| 21  | 2,387.2 | 1,194.1 | 2,370.1 | 2,369.1 | S    | 1,092.5 | 546.8   | 1,075.5 | 1,074.5 | 10  |
| 22  | 2,444.2 | 1,222.6 | 2,427.1 | 2,426.2 | G    | 1,005.5 | 503.2   | 988.5   | 987.5   | 9   |
| 23  | 2,515.2 | 1,258.1 | 2,498.2 | 2,497.2 | A    | 948.5   | 474.7   | 931.4   | 930.4   | 8   |
| 24  | 2,630.2 | 1,315.6 | 2,613.2 | 2,612.2 | D    | 877.4   | 439.2   | 860.4   | 859.4   | 7   |
| 25  | 2,743.3 | 1,372.2 | 2,726.3 | 2,725.3 | I    | 762.4   | 381.7   | 745.4   | 744.4   | 6   |
| 26  | 2,844.4 | 1,422.7 | 2,827.3 | 2,826.4 | T    | 649.3   |         | 632.3   | 631.3   | 5   |
| 27  | 2,958.4 | 1,479.7 | 2,941.4 | 2,940.4 | N    | 548.3   |         | 531.2   |         | 4   |
| 28  | 3,057.5 | 1,529.2 | 3,040.5 | 3,039.5 | V    | 434.2   |         | 417.2   |         | 3   |
| 29  | 3,217.5 | 1,609.3 | 3,200.5 | 3,199.5 | C+57 | 335.1   |         | 318.1   |         | 2   |
| 30  | 3,391.6 | 1,696.3 | 3,374.6 | 3,373.6 | R    | 175.1   |         | 158.1   |         | 1   |

# Nuclear proteome

| Protein No. | Leading protein name  | Sequence      | Mascot Score | Variable Modifications | SILAC State | Charge | m/z       |
|-------------|-----------------------|---------------|--------------|------------------------|-------------|--------|-----------|
| N-20        | sp P42766 IRL35_HUMAN | QLDDLKVELSQLR | 94.25        | Unmodified             | Heavy       | 2      | 778.93576 |

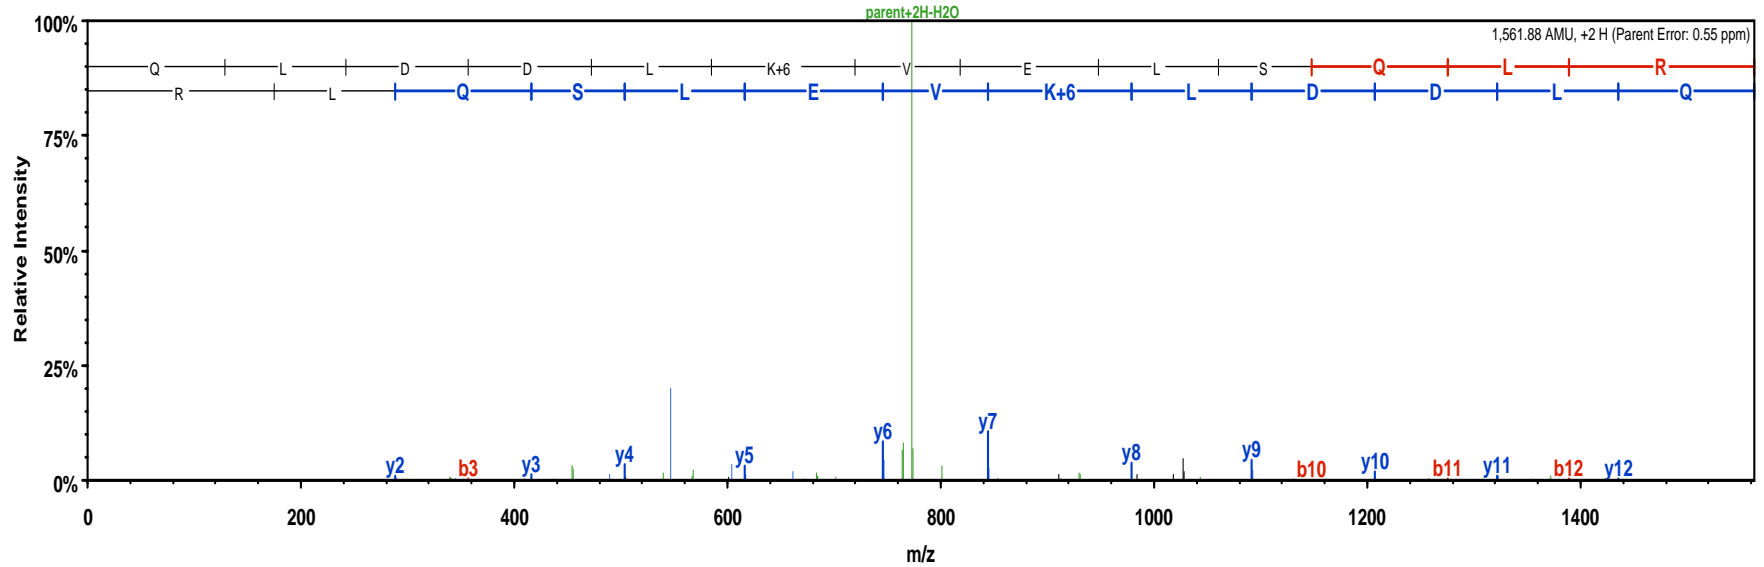

| ... | B Ions  | B+2H  | B-NH3   | B-H2O   | AA  | Y Ions  | Y+2H  | Y-NH3   | Y-H2O   | ... |
|-----|---------|-------|---------|---------|-----|---------|-------|---------|---------|-----|
| 1   | 129.1   |       | 112.0   |         | Q   | 1,562.9 | 781.9 | 1,545.9 | 1,544.9 | 13  |
| 2   | 242.1   |       | 225.1   |         | L   | 1,434.8 | 717.9 | 1,417.8 | 1,416.8 | 12  |
| 3   | 357.2   |       | 340.2   | 339.2   | D   | 1,321.7 | 661.4 | 1,304.7 | 1,303.7 | 11  |
| 4   | 472.2   |       | 455.2   | 454.2   | D   | 1,206.7 | 603.9 | 1,189.7 | 1,188.7 | 10  |
| 5   | 585.3   |       | 568.3   | 567.3   | L   | 1,091.7 | 546.3 | 1,074.7 | 1,073.7 | 9   |
| 6   | 719.4   | 360.2 | 702.4   | 701.4   | K+6 | 978.6   | 489.8 | 961.6   | 960.6   | 8   |
| 7   | 818.5   | 409.7 | 801.4   | 800.5   | V   | 844.5   | 422.7 | 827.5   | 826.5   | 7   |
| 8   | 947.5   | 474.3 | 930.5   | 929.5   | E   | 745.4   | 373.2 | 728.4   | 727.4   | 6   |
| 9   | 1,060.6 | 530.8 | 1,043.6 | 1,042.6 | L   | 616.4   |       | 599.4   | 598.4   | 5   |
| 10  | 1,147.6 | 574.3 | 1,130.6 | 1,129.6 | S   | 503.3   |       | 486.3   | 485.3   | 4   |
| 11  | 1,275.7 | 638.3 | 1,258.7 | 1,257.7 | Q   | 416.3   |       | 399.2   |         | 3   |
| 12  | 1,388.8 | 694.9 | 1,371.7 | 1,370.8 | L   | 288.2   |       | 271.2   |         | 2   |
| 13  | 1,562.9 | 781.9 | 1,545.9 | 1,544.9 | R   | 175.1   |       | 158.1   |         | 1   |

# Nuclear proteome

| Protein No. | Leading protein name   | Sequence             | Mascot Score | Variable Modifications | SILAC State | Charge | m/z       |
|-------------|------------------------|----------------------|--------------|------------------------|-------------|--------|-----------|
| N-21        | sp Q8TF01 ISFR18_HUMAN | MLLTEILLDVTDEEIYYVAK | 92.1         | Unmodified             | Light       | 2      | 1186.1213 |

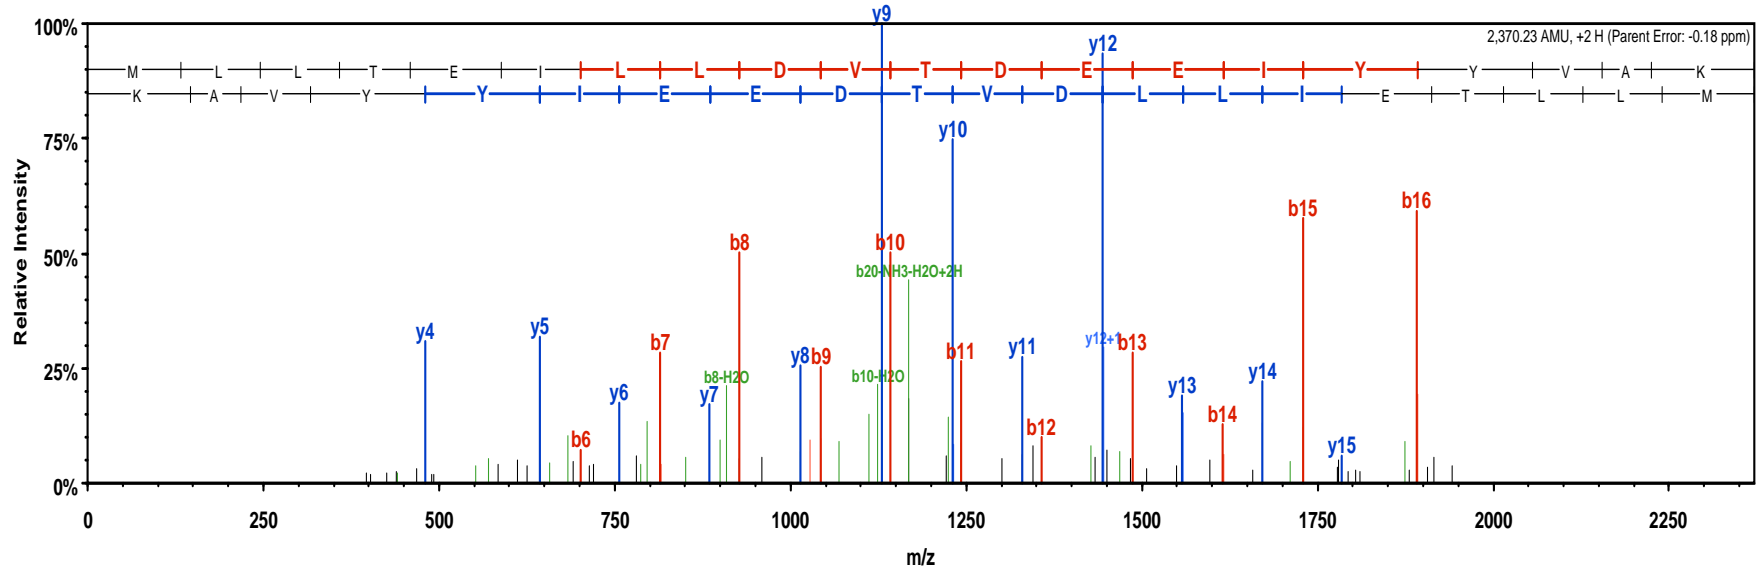

| ... | B Ions  | B+2H    | B-NH3   | B-H2O   | AA | Y Ions  | Y+2H    | Y-NH3   | Y-H2O   | ... |
|-----|---------|---------|---------|---------|----|---------|---------|---------|---------|-----|
| 1   | 132.0   |         |         |         | M  | 2,371.2 | 1,186.1 | 2,354.2 | 2,353.2 | 20  |
| 2   | 245.1   |         |         |         | L  | 2,240.2 | 1,120.6 | 2,223.2 | 2,222.2 | 19  |
| 3   | 358.2   |         |         |         | L  | 2,127.1 | 1,064.1 | 2,110.1 | 2,109.1 | 18  |
| 4   | 459.3   |         |         | 441.3   | T  | 2,014.0 | 1,007.5 | 1,997.0 | 1,996.0 | 17  |
| 5   | 588.3   |         |         | 570.3   | E  | 1,913.0 | 957.0   | 1,896.0 | 1,895.0 | 16  |
| 6   | 701.4   | 351.2   |         | 683.4   | I  | 1,783.9 | 892.5   | 1,766.9 | 1,765.9 | 15  |
| 7   | 814.5   | 407.7   |         | 796.5   | L  | 1,670.9 | 835.9   | 1,653.8 | 1,652.8 | 14  |
| 8   | 927.6   | 464.3   |         | 909.5   | L  | 1,557.8 | 779.4   | 1,540.7 | 1,539.8 | 13  |
| 9   | 1,042.6 | 521.8   |         | 1,024.6 | D  | 1,444.7 | 722.8   | 1,427.7 | 1,426.7 | 12  |
| 10  | 1,141.7 | 571.3   |         | 1,123.6 | V  | 1,329.7 | 665.3   | 1,312.6 | 1,311.6 | 11  |
| 11  | 1,242.7 | 621.9   |         | 1,224.7 | T  | 1,230.6 | 615.8   | 1,213.6 | 1,212.6 | 10  |
| 12  | 1,357.7 | 679.4   |         | 1,339.7 | D  | 1,129.5 | 565.3   | 1,112.5 | 1,111.5 | 9   |
| 13  | 1,486.8 | 743.9   |         | 1,468.8 | E  | 1,014.5 | 507.8   | 997.5   | 996.5   | 8   |
| 14  | 1,615.8 | 808.4   |         | 1,597.8 | E  | 885.5   | 443.2   | 868.4   | 867.5   | 7   |
| 15  | 1,728.9 | 865.0   |         | 1,710.9 | I  | 756.4   | 378.7   | 739.4   |         | 6   |
| 16  | 1,892.0 | 946.5   |         | 1,874.0 | Y  | 643.3   |         | 626.3   |         | 5   |
| 17  | 2,055.0 | 1,028.0 |         | 2,037.0 | Y  | 480.3   |         | 463.3   |         | 4   |
| 18  | 2,154.1 | 1,077.6 |         | 2,136.1 | V  | 317.2   |         | 300.2   |         | 3   |
| 19  | 2,225.1 | 1,113.1 |         | 2,207.1 | A  | 218.1   |         | 201.1   |         | 2   |
| 20  | 2,371.2 | 1,186.1 | 2,354.2 | 2,353.2 | K  | 147.1   |         | 130.1   |         | 1   |

# Nuclear proteome

| Protein No. | Leading protein name  | Sequence           | Mascot Score | Variable Modifications | SILAC State | Charge | m/z      |
|-------------|-----------------------|--------------------|--------------|------------------------|-------------|--------|----------|
| N-22        | sp Q9NUG6 PDRG1_HUMAN | YLVEVEELAAEEVLADKR | 91.45        | Unmodified             | Heavy       | 2      | 1003.028 |

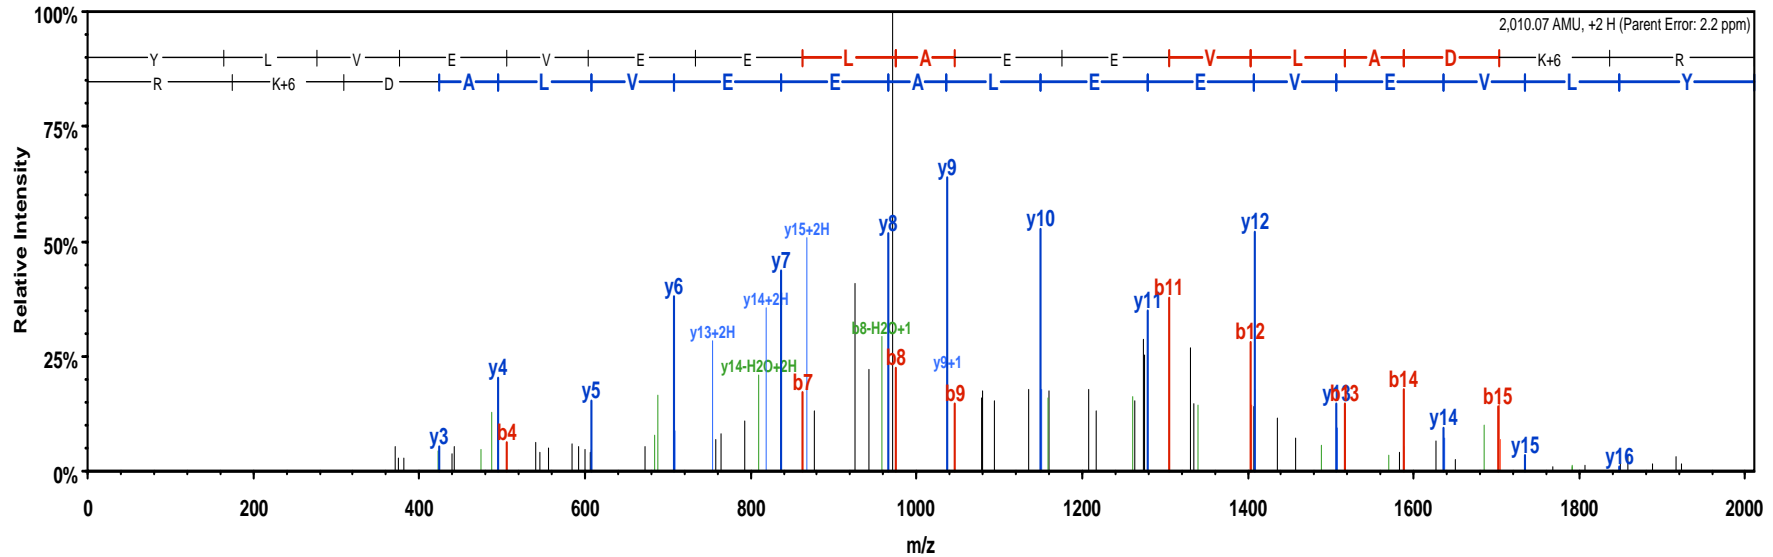

| ... | B Ions  | B+2H    | B-NH3   | B-H2O   | AA  | Y Ions  | Y+2H    | Y-NH3   | Y-H2O   | ... |
|-----|---------|---------|---------|---------|-----|---------|---------|---------|---------|-----|
| 1   | 164.1   |         |         |         | Y   | 2,011.1 | 1,006.0 | 1,994.0 | 1,993.1 | 17  |
| 2   | 277.2   |         |         |         | L   | 1,848.0 | 924.5   | 1,831.0 | 1,830.0 | 16  |
| 3   | 376.2   |         |         |         | V   | 1,734.9 | 868.0   | 1,717.9 | 1,716.9 | 15  |
| 4   | 505.3   |         |         | 487.3   | E   | 1,635.9 | 818.4   | 1,618.8 | 1,617.8 | 14  |
| 5   | 604.3   |         |         | 586.3   | V   | 1,506.8 | 753.9   | 1,489.8 | 1,488.8 | 13  |
| 6   | 733.4   | 367.2   |         | 715.4   | E   | 1,407.7 | 704.4   | 1,390.7 | 1,389.7 | 12  |
| 7   | 862.4   | 431.7   |         | 844.4   | E   | 1,278.7 | 639.9   | 1,261.7 | 1,260.7 | 11  |
| 8   | 975.5   | 488.3   |         | 957.5   | L   | 1,149.7 | 575.3   | 1,132.6 | 1,131.6 | 10  |
| 9   | 1,046.5 | 523.8   |         | 1,028.5 | A   | 1,036.6 | 518.8   | 1,019.5 | 1,018.6 | 9   |
| 10  | 1,175.6 | 588.3   |         | 1,157.6 | E   | 965.5   | 483.3   | 948.5   | 947.5   | 8   |
| 11  | 1,304.6 | 652.8   |         | 1,286.6 | E   | 836.5   | 418.8   | 819.5   | 818.5   | 7   |
| 12  | 1,403.7 | 702.4   |         | 1,385.7 | V   | 707.5   | 354.2   | 690.4   | 689.4   | 6   |
| 13  | 1,516.8 | 758.9   |         | 1,498.8 | L   | 608.4   | 304.7   | 591.4   | 590.4   | 5   |
| 14  | 1,587.8 | 794.4   |         | 1,569.8 | A   | 495.3   | 248.2   | 478.3   | 477.3   | 4   |
| 15  | 1,702.8 | 851.9   |         | 1,684.8 | D   | 424.3   | 212.6   | 407.2   | 406.3   | 3   |
| 16  | 1,837.0 | 919.0   | 1,819.9 | 1,818.9 | K+6 | 309.2   | 155.1   | 292.2   |         | 2   |
| 17  | 2,011.1 | 1,006.0 | 1,994.0 | 1,993.1 | R   | 175.1   |         | 158.1   |         | 1   |

# Nuclear proteome

| Protein No. | Leading protein name  | Sequence           | Mascot Score | Variable Modifications | SILAC State | Charge | m/z       |
|-------------|-----------------------|--------------------|--------------|------------------------|-------------|--------|-----------|
| N-23        | sp Q5VTE6 ANGE2_HUMAN | LTQLAMLLAEISSVAHQK | 90.67        | Unmodified             | Light       | 2      | 977.04552 |

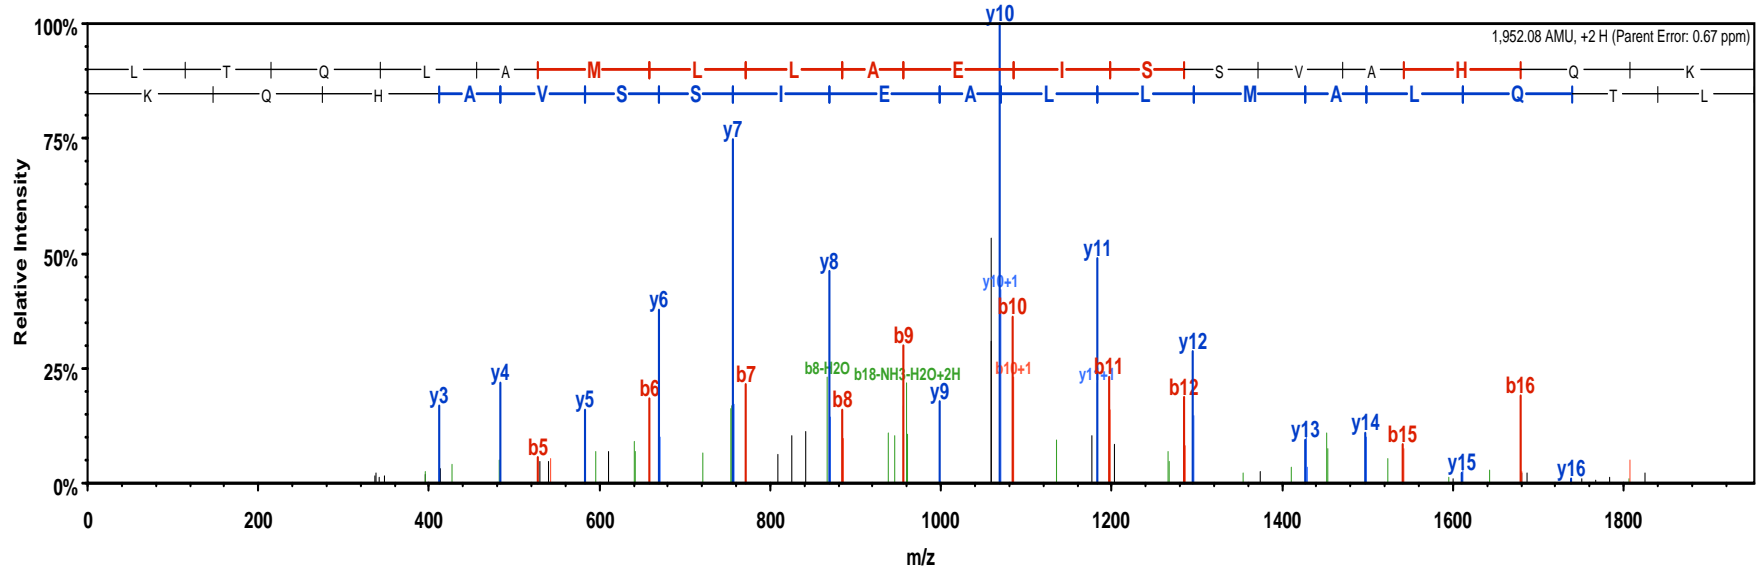

| ... | B Ions  | B+2H  | B-NH3   | B-H2O   | AA | Y Ions  | Y+2H  | Y-NH3   | Y-H2O   | ... |
|-----|---------|-------|---------|---------|----|---------|-------|---------|---------|-----|
| 1   | 114.1   |       |         |         | L  | 1,953.1 | 977.0 | 1,936.1 | 1,935.1 | 18  |
| 2   | 215.1   |       |         | 197.1   | T  | 1,840.0 | 920.5 | 1,823.0 | 1,822.0 | 17  |
| 3   | 343.2   |       | 326.2   | 325.2   | Q  | 1,739.0 | 870.0 | 1,721.9 | 1,720.9 | 16  |
| 4   | 456.3   |       | 439.3   | 438.3   | L  | 1,610.9 | 806.0 | 1,593.9 | 1,592.9 | 15  |
| 5   | 527.3   |       | 510.3   | 509.3   | A  | 1,497.8 | 749.4 | 1,480.8 | 1,479.8 | 14  |
| 6   | 658.4   | 329.7 | 641.3   | 640.3   | M  | 1,426.8 | 713.9 | 1,409.7 | 1,408.8 | 13  |
| 7   | 771.4   | 386.2 | 754.4   | 753.4   | L  | 1,295.7 | 648.4 | 1,278.7 | 1,277.7 | 12  |
| 8   | 884.5   | 442.8 | 867.5   | 866.5   | L  | 1,182.6 | 591.8 | 1,165.6 | 1,164.6 | 11  |
| 9   | 955.6   | 478.3 | 938.5   | 937.6   | A  | 1,069.6 | 535.3 | 1,052.5 | 1,051.6 | 10  |
| 10  | 1,084.6 | 542.8 | 1,067.6 | 1,066.6 | E  | 998.5   | 499.8 | 981.5   | 980.5   | 9   |
| 11  | 1,197.7 | 599.3 | 1,180.7 | 1,179.7 | I  | 869.5   | 435.2 | 852.5   | 851.5   | 8   |
| 12  | 1,284.7 | 642.9 | 1,267.7 | 1,266.7 | S  | 756.4   | 378.7 | 739.4   | 738.4   | 7   |
| 13  | 1,371.8 | 686.4 | 1,354.7 | 1,353.7 | S  | 669.4   | 335.2 | 652.3   | 651.4   | 6   |
| 14  | 1,470.8 | 735.9 | 1,453.8 | 1,452.8 | V  | 582.3   | 291.7 | 565.3   |         | 5   |
| 15  | 1,541.9 | 771.4 | 1,524.8 | 1,523.9 | A  | 483.3   | 242.1 | 466.2   |         | 4   |
| 16  | 1,678.9 | 840.0 | 1,661.9 | 1,660.9 | H  | 412.2   | 206.6 | 395.2   |         | 3   |
| 17  | 1,807.0 | 904.0 | 1,790.0 | 1,789.0 | Q  | 275.2   |       | 258.1   |         | 2   |
| 18  | 1,953.1 | 977.0 | 1,936.1 | 1,935.1 | K  | 147.1   |       | 130.1   |         | 1   |



# Nuclear proteome

| Protein No. | Leading protein name   | Sequence                   | Mascot Score | Variable Modifications | SILAC State | Charge | m/z       |
|-------------|------------------------|----------------------------|--------------|------------------------|-------------|--------|-----------|
| N-24        | sp Q8NHY2 IRFWD2_HUMAN | VVEYDTVIQDAVDIHYPENEMTCNSK | 90.05        | Unmodified             | Light       | 3      | 1045.1304 |

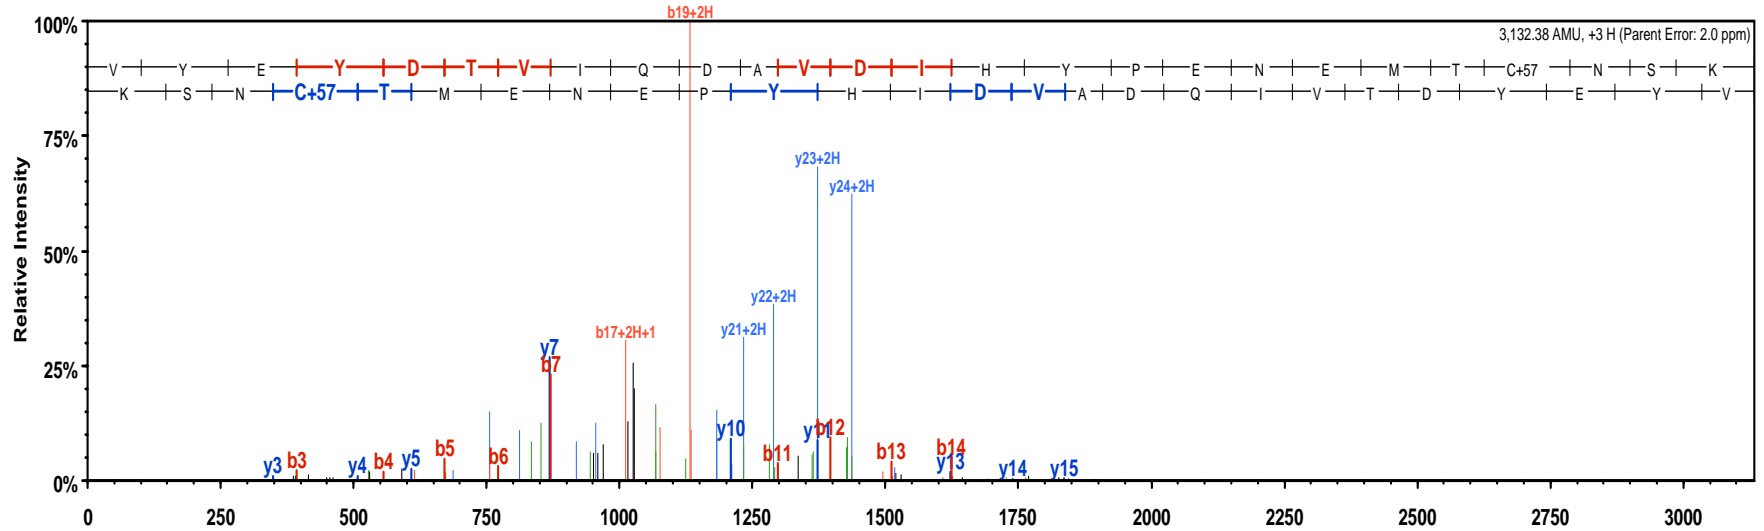

| ... | B Ions  | B+2H    | B-NH3   | B-H2O   | AA   | Y Ions  | Y+2H    | Y-NH3   | Y-H2O   | ... | m/z |
|-----|---------|---------|---------|---------|------|---------|---------|---------|---------|-----|-----|
| 1   | 100.1   |         |         |         | V    | 3,133.4 | 1,567.2 | 3,116.4 | 3,115.4 | 26  |     |
| 2   | 263.1   |         |         |         | Y    | 3,034.3 | 1,517.7 | 3,017.3 | 3,016.3 | 25  |     |
| 3   | 392.2   |         |         | 374.2   | E    | 2,871.2 | 1,436.1 | 2,854.2 | 2,853.2 | 24  |     |
| 4   | 555.2   |         |         | 537.2   | Y    | 2,742.2 | 1,371.6 | 2,725.2 | 2,724.2 | 23  |     |
| 5   | 670.3   |         |         | 652.3   | D    | 2,579.1 | 1,290.1 | 2,562.1 | 2,561.1 | 22  |     |
| 6   | 771.3   | 386.2   |         | 753.3   | T    | 2,464.1 | 1,232.6 | 2,447.1 | 2,446.1 | 21  |     |
| 7   | 870.4   | 435.7   |         | 852.4   | V    | 2,363.1 | 1,182.0 | 2,346.0 | 2,345.1 | 20  |     |
| 8   | 983.5   | 492.2   |         | 965.5   | I    | 2,264.0 | 1,132.5 | 2,247.0 | 2,246.0 | 19  |     |
| 9   | 1,111.5 | 556.3   | 1,094.5 | 1,093.5 | Q    | 2,150.9 | 1,076.0 | 2,133.9 | 2,132.9 | 18  |     |
| 10  | 1,226.6 | 613.8   | 1,209.5 | 1,208.5 | D    | 2,022.9 | 1,011.9 | 2,005.8 | 2,004.8 | 17  |     |
| 11  | 1,297.6 | 649.3   | 1,280.6 | 1,279.6 | A    | 1,907.8 | 954.4   | 1,890.8 | 1,889.8 | 16  |     |
| 12  | 1,396.7 | 698.8   | 1,379.6 | 1,378.7 | V    | 1,836.8 | 918.9   | 1,819.8 | 1,818.8 | 15  |     |
| 13  | 1,511.7 | 756.3   | 1,494.7 | 1,493.7 | D    | 1,737.7 | 869.4   | 1,720.7 | 1,719.7 | 14  |     |
| 14  | 1,624.8 | 812.9   | 1,607.7 | 1,606.8 | I    | 1,622.7 | 811.9   | 1,605.7 | 1,604.7 | 13  |     |
| 15  | 1,761.8 | 881.4   | 1,744.8 | 1,743.8 | H    | 1,509.6 | 755.3   | 1,492.6 | 1,491.6 | 12  |     |
| 16  | 1,924.9 | 963.0   | 1,907.9 | 1,906.9 | Y    | 1,372.6 | 686.8   | 1,355.5 | 1,354.5 | 11  |     |
| 17  | 2,021.9 | 1,011.5 | 2,004.9 | 2,003.9 | P    | 1,209.5 | 605.2   | 1,192.5 | 1,191.5 | 10  |     |
| 18  | 2,151.0 | 1,076.0 | 2,134.0 | 2,133.0 | E    | 1,112.4 | 556.7   | 1,095.4 | 1,094.4 | 9   |     |
| 19  | 2,265.0 | 1,133.0 | 2,248.0 | 2,247.0 | N    | 983.4   | 492.2   | 966.4   | 965.4   | 8   |     |
| 20  | 2,394.1 | 1,197.5 | 2,377.1 | 2,376.1 | E    | 869.3   | 435.2   | 852.3   | 851.3   | 7   |     |
| 21  | 2,525.1 | 1,263.1 | 2,508.1 | 2,507.1 | M    | 740.3   | 370.7   | 723.3   | 722.3   | 6   |     |
| 22  | 2,626.2 | 1,313.6 | 2,609.1 | 2,608.2 | T    | 609.3   |         | 592.2   | 591.3   | 5   |     |
| 23  | 2,786.2 | 1,393.6 | 2,769.2 | 2,768.2 | C+57 | 508.2   |         | 491.2   | 490.2   | 4   |     |
| 24  | 2,900.2 | 1,450.6 | 2,883.2 | 2,882.2 | N    | 348.2   |         | 331.2   | 330.2   | 3   |     |
| 25  | 2,987.3 | 1,494.1 | 2,970.2 | 2,969.3 | S    | 234.1   |         | 217.1   | 216.1   | 2   |     |
| 26  | 3,133.4 | 1,567.2 | 3,116.4 | 3,115.4 | K    | 147.1   |         | 130.1   |         | 1   |     |

# Nuclear proteome

| Protein No. | Leading protein name  | Sequence        | Mascot Score | Variable Modifications | SILAC State | Charge | m/z       |
|-------------|-----------------------|-----------------|--------------|------------------------|-------------|--------|-----------|
| N-25        | sp Q9UNFO PACN2_HUMAN | ALYDYEGQEHDLSFK | 89.96        | Unmodified             | Heavy       | 2      | 972.43652 |

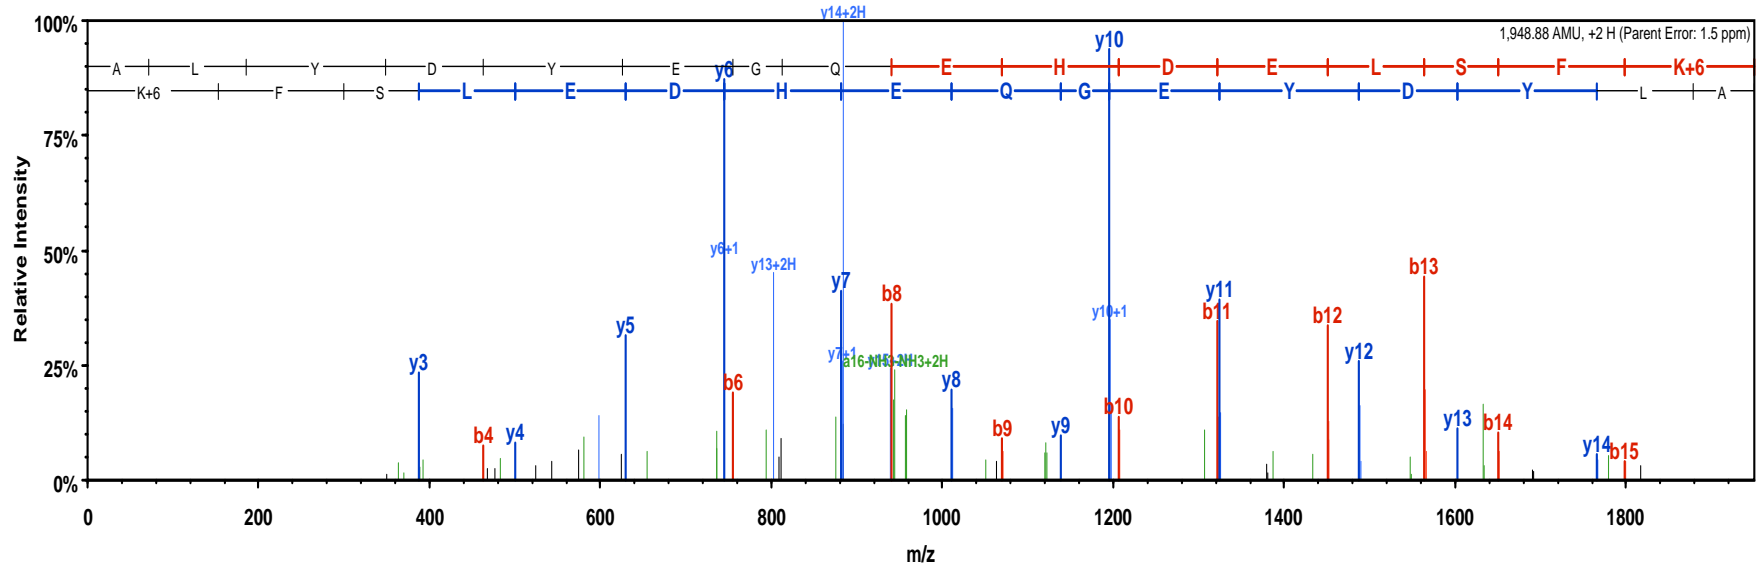

| ... | B Ions  | B+2H  | B-NH3   | B-H2O   | AA  | Y Ions  | Y+2H  | Y-NH3   | Y-H2O   | ... |
|-----|---------|-------|---------|---------|-----|---------|-------|---------|---------|-----|
| 1   | 72.0    |       |         |         | A   | 1,949.9 | 975.4 | 1,932.9 | 1,931.9 | 16  |
| 2   | 185.1   |       |         |         | L   | 1,878.8 | 939.9 | 1,861.8 | 1,860.8 | 15  |
| 3   | 348.2   |       |         |         | Y   | 1,765.8 | 883.4 | 1,748.7 | 1,747.8 | 14  |
| 4   | 463.2   |       |         | 445.2   | D   | 1,602.7 | 801.9 | 1,585.7 | 1,584.7 | 13  |
| 5   | 626.3   |       |         | 608.3   | Y   | 1,487.7 | 744.3 | 1,470.6 | 1,469.7 | 12  |
| 6   | 755.3   | 378.2 |         | 737.3   | E   | 1,324.6 | 662.8 | 1,307.6 | 1,306.6 | 11  |
| 7   | 812.3   | 406.7 |         | 794.3   | G   | 1,195.6 | 598.3 | 1,178.5 | 1,177.6 | 10  |
| 8   | 940.4   | 470.7 | 923.4   | 922.4   | Q   | 1,138.5 | 569.8 | 1,121.5 | 1,120.5 | 9   |
| 9   | 1,069.4 | 535.2 | 1,052.4 | 1,051.4 | E   | 1,010.5 | 505.7 | 993.5   | 992.5   | 8   |
| 10  | 1,206.5 | 603.8 | 1,189.5 | 1,188.5 | H   | 881.4   | 441.2 | 864.4   | 863.4   | 7   |
| 11  | 1,321.5 | 661.3 | 1,304.5 | 1,303.5 | D   | 744.4   | 372.7 | 727.4   | 726.4   | 6   |
| 12  | 1,450.6 | 725.8 | 1,433.5 | 1,432.6 | E   | 629.4   |       | 612.3   | 611.3   | 5   |
| 13  | 1,563.7 | 782.3 | 1,546.6 | 1,545.6 | L   | 500.3   |       | 483.3   | 482.3   | 4   |
| 14  | 1,650.7 | 825.8 | 1,633.7 | 1,632.7 | S   | 387.2   |       | 370.2   | 369.2   | 3   |
| 15  | 1,797.8 | 899.4 | 1,780.7 | 1,779.7 | F   | 300.2   |       | 283.2   |         | 2   |
| 16  | 1,949.9 | 975.4 | 1,932.9 | 1,931.9 | K+6 | 153.1   |       | 136.1   |         | 1   |

# Nuclear proteome

| Protein No. | Leading protein name   | Sequence           | Mascot Score | Variable Modifications | SILAC State | Charge | m/z       |
|-------------|------------------------|--------------------|--------------|------------------------|-------------|--------|-----------|
| N-26        | sp P61513 IRL37A_HUMAN | TVAGGAWTYNTTSAVTVK | 88.91        | Unmodified             | Heavy       | 2      | 913.96779 |

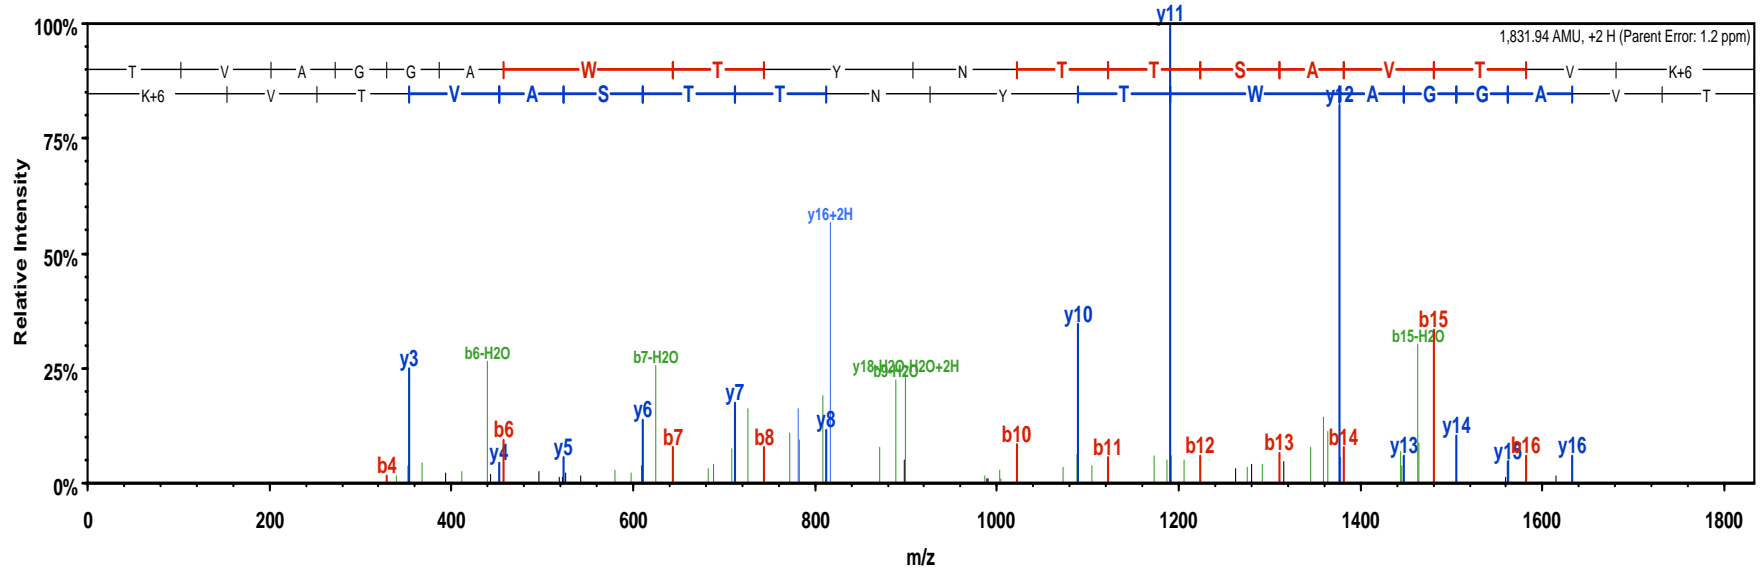

| ... | B Ions  | B+2H  | B-NH3   | B-H2O   | AA  | Y Ions  | Y+2H  | Y-NH3   | Y-H2O   | ... |
|-----|---------|-------|---------|---------|-----|---------|-------|---------|---------|-----|
| 1   | 102.1   |       |         | 84.0    | T   | 1,832.9 | 917.0 | 1,815.9 | 1,814.9 | 18  |
| 2   | 201.1   |       |         | 183.1   | V   | 1,731.9 | 866.5 | 1,714.9 | 1,713.9 | 17  |
| 3   | 272.2   |       |         | 254.1   | A   | 1,632.8 | 816.9 | 1,615.8 | 1,614.8 | 16  |
| 4   | 329.2   |       |         | 311.2   | G   | 1,561.8 | 781.4 | 1,544.8 | 1,543.8 | 15  |
| 5   | 386.2   |       |         | 368.2   | G   | 1,504.8 | 752.9 | 1,487.7 | 1,486.8 | 14  |
| 6   | 457.2   | 229.1 |         | 439.2   | A   | 1,447.8 | 724.4 | 1,430.7 | 1,429.7 | 13  |
| 7   | 643.3   | 322.2 |         | 625.3   | W   | 1,376.7 | 688.9 | 1,359.7 | 1,358.7 | 12  |
| 8   | 744.4   | 372.7 |         | 726.4   | T   | 1,190.6 | 595.8 | 1,173.6 | 1,172.6 | 11  |
| 9   | 907.4   | 454.2 |         | 889.4   | Y   | 1,089.6 | 545.3 | 1,072.6 | 1,071.6 | 10  |
| 10  | 1,021.5 | 511.2 | 1,004.4 | 1,003.5 | N   | 926.5   | 463.8 | 909.5   | 908.5   | 9   |
| 11  | 1,122.5 | 561.8 | 1,105.5 | 1,104.5 | T   | 812.5   | 406.7 | 795.5   | 794.5   | 8   |
| 12  | 1,223.6 | 612.3 | 1,206.5 | 1,205.6 | T   | 711.4   | 356.2 | 694.4   | 693.4   | 7   |
| 13  | 1,310.6 | 655.8 | 1,293.6 | 1,292.6 | S   | 610.4   | 305.7 | 593.4   | 592.4   | 6   |
| 14  | 1,381.6 | 691.3 | 1,364.6 | 1,363.6 | A   | 523.4   |       | 506.3   | 505.3   | 5   |
| 15  | 1,480.7 | 740.9 | 1,463.7 | 1,462.7 | V   | 452.3   |       | 435.3   | 434.3   | 4   |
| 16  | 1,581.8 | 791.4 | 1,564.7 | 1,563.7 | T   | 353.2   |       | 336.2   | 335.2   | 3   |
| 17  | 1,680.8 | 840.9 | 1,663.8 | 1,662.8 | V   | 252.2   |       | 235.2   |         | 2   |
| 18  | 1,832.9 | 917.0 | 1,815.9 | 1,814.9 | K+6 | 153.1   |       | 136.1   |         | 1   |

# Nuclear proteome

| Protein No. | Leading protein name  | Sequence                                    | Mascot Score | Variable Modifications | SILAC State | Charge | m/z       |
|-------------|-----------------------|---------------------------------------------|--------------|------------------------|-------------|--------|-----------|
| N-27        | sp P62312 ILSM6_HUMAN | GVLACLDGYMNI <sup>C+57</sup> ALEQTEEYVNGQLK | 87.47        | Unmodified             | Light       | 3      | 976.80877 |

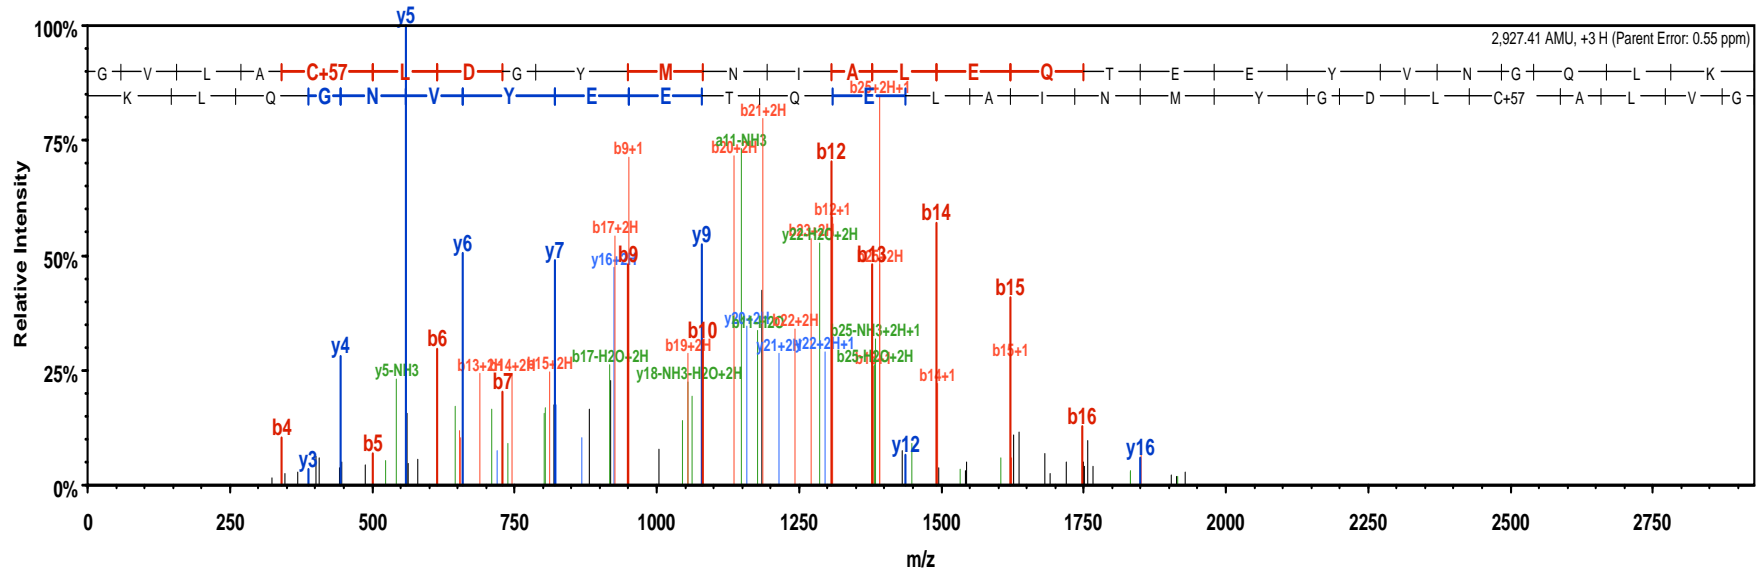

| ... | B Ions  | B+2H    | B-NH3   | B-H2O   | AA   | Y Ions  | Y+2H    | Y-NH3   | Y-H2O   | ... |
|-----|---------|---------|---------|---------|------|---------|---------|---------|---------|-----|
| 1   | 58.0    |         |         |         | G    | 2,928.4 | 1,464.7 | 2,911.4 | 2,910.4 | 26  |
| 2   | 157.1   |         |         |         | V    | 2,871.4 | 1,436.2 | 2,854.4 | 2,853.4 | 25  |
| 3   | 270.2   |         |         |         | L    | 2,772.3 | 1,386.7 | 2,755.3 | 2,754.3 | 24  |
| 4   | 341.2   |         |         |         | A    | 2,659.2 | 1,330.1 | 2,642.2 | 2,641.2 | 23  |
| 5   | 501.2   |         |         |         | C+57 | 2,588.2 | 1,294.6 | 2,571.2 | 2,570.2 | 22  |
| 6   | 614.3   | 307.7   |         |         | L    | 2,428.2 | 1,214.6 | 2,411.1 | 2,410.2 | 21  |
| 7   | 729.4   | 365.2   |         | 711.3   | D    | 2,315.1 | 1,158.0 | 2,298.1 | 2,297.1 | 20  |
| 8   | 786.4   | 393.7   |         | 768.4   | G    | 2,200.1 | 1,100.5 | 2,183.0 | 2,182.0 | 19  |
| 9   | 949.4   | 475.2   |         | 931.4   | Y    | 2,143.0 | 1,072.0 | 2,126.0 | 2,125.0 | 18  |
| 10  | 1,080.5 | 540.7   |         | 1,062.5 | M    | 1,980.0 | 990.5   | 1,962.9 | 1,962.0 | 17  |
| 11  | 1,194.5 | 597.8   | 1,177.5 | 1,176.5 | N    | 1,848.9 | 925.0   | 1,831.9 | 1,830.9 | 16  |
| 12  | 1,307.6 | 654.3   | 1,290.6 | 1,289.6 | I    | 1,734.9 | 867.9   | 1,717.9 | 1,716.9 | 15  |
| 13  | 1,378.6 | 689.8   | 1,361.6 | 1,360.6 | A    | 1,621.8 | 811.4   | 1,604.8 | 1,603.8 | 14  |
| 14  | 1,491.7 | 746.4   | 1,474.7 | 1,473.7 | L    | 1,550.8 | 775.9   | 1,533.7 | 1,532.8 | 13  |
| 15  | 1,620.8 | 810.9   | 1,603.7 | 1,602.8 | E    | 1,437.7 | 719.3   | 1,420.7 | 1,419.7 | 12  |
| 16  | 1,748.8 | 874.9   | 1,731.8 | 1,730.8 | Q    | 1,308.6 | 654.8   | 1,291.6 | 1,290.6 | 11  |
| 17  | 1,849.9 | 925.4   | 1,832.9 | 1,831.9 | T    | 1,180.6 | 590.8   | 1,163.6 | 1,162.6 | 10  |
| 18  | 1,978.9 | 990.0   | 1,961.9 | 1,960.9 | E    | 1,079.5 | 540.3   | 1,062.5 | 1,061.5 | 9   |
| 19  | 2,108.0 | 1,054.5 | 2,090.9 | 2,090.0 | E    | 950.5   | 475.8   | 933.5   | 932.5   | 8   |
| 20  | 2,271.0 | 1,136.0 | 2,254.0 | 2,253.0 | Y    | 821.5   | 411.2   | 804.4   |         | 7   |
| 21  | 2,370.1 | 1,185.6 | 2,353.1 | 2,352.1 | V    | 658.4   | 329.7   | 641.4   |         | 6   |
| 22  | 2,484.1 | 1,242.6 | 2,467.1 | 2,466.1 | N    | 559.3   |         | 542.3   |         | 5   |
| 23  | 2,541.2 | 1,271.1 | 2,524.1 | 2,523.2 | G    | 445.3   |         | 428.3   |         | 4   |
| 24  | 2,669.2 | 1,335.1 | 2,652.2 | 2,651.2 | Q    | 388.3   |         | 371.2   |         | 3   |
| 25  | 2,782.3 | 1,391.7 | 2,765.3 | 2,764.3 | L    | 260.2   |         | 243.2   |         | 2   |
| 26  | 2,928.4 | 1,464.7 | 2,911.4 | 2,910.4 | K    | 147.1   |         | 130.1   |         | 1   |

# Nuclear proteome

| Protein No. | Leading protein name | Sequence                         | Mascot Score | Variable Modifications | SILAC State | Charge | m/z       |
|-------------|----------------------|----------------------------------|--------------|------------------------|-------------|--------|-----------|
| N-28        | sp Q13901 C1D_HUMAN  | AGEEINEDYPVEIHEYLSAFENSIGAVDEMLK | 85.59        | Unmodified             | Light       | 3      | 1204.5627 |

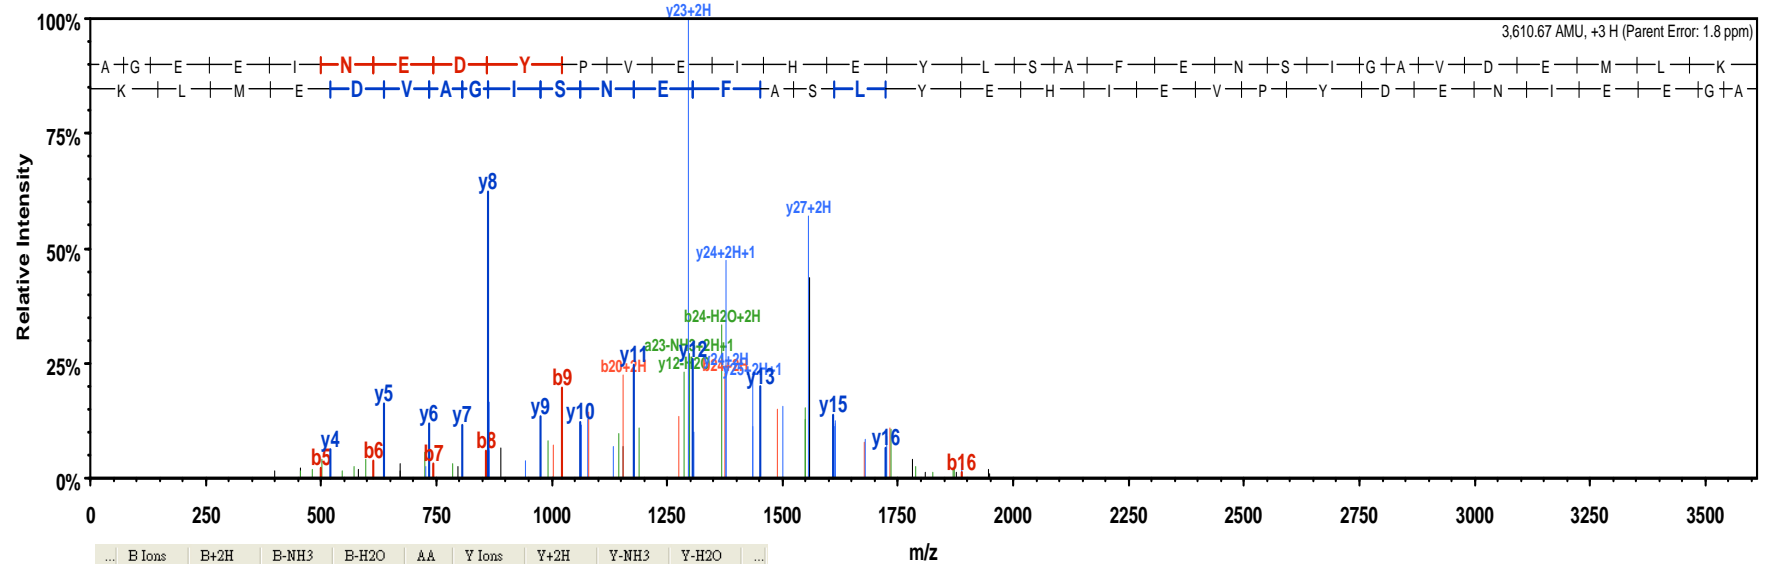

| ... | B Ions  | E+2H    | B-NH3   | E-H2O   | AA | Y Ions  | Y+2H    | Y-NH3   | Y-H2O   | ... |
|-----|---------|---------|---------|---------|----|---------|---------|---------|---------|-----|
| 1   | 72.0    |         |         |         | A  | 3,611.7 | 1,806.3 | 3,594.6 | 3,593.7 | 32  |
| 2   | 129.1   |         |         |         | G  | 3,540.6 | 1,770.8 | 3,523.6 | 3,522.6 | 31  |
| 3   | 258.1   |         |         | 240.1   | E  | 3,483.6 | 1,742.3 | 3,466.6 | 3,465.6 | 30  |
| 4   | 387.2   |         |         | 369.1   | E  | 3,354.6 | 1,677.8 | 3,337.5 | 3,336.6 | 29  |
| 5   | 500.2   |         |         | 482.2   | I  | 3,225.5 | 1,613.3 | 3,208.5 | 3,207.5 | 28  |
| 6   | 614.3   | 307.6   | 597.3   | 596.3   | N  | 3,112.4 | 1,556.7 | 3,095.4 | 3,094.4 | 27  |
| 7   | 743.3   | 372.2   | 726.3   | 725.3   | E  | 2,998.4 | 1,499.7 | 2,981.4 | 2,980.4 | 26  |
| 8   | 858.3   | 429.7   | 841.3   | 840.3   | D  | 2,869.4 | 1,435.2 | 2,852.3 | 2,851.3 | 25  |
| 9   | 1,021.4 | 511.2   | 1,004.4 | 1,003.4 | Y  | 2,754.3 | 1,377.7 | 2,737.3 | 2,736.3 | 24  |
| 10  | 1,118.5 | 559.7   | 1,101.4 | 1,100.5 | P  | 2,591.3 | 1,296.1 | 2,574.2 | 2,573.3 | 23  |
| 11  | 1,217.5 | 609.3   | 1,200.5 | 1,199.5 | Y  | 2,494.2 | 1,247.6 | 2,477.2 | 2,476.2 | 22  |
| 12  | 1,346.6 | 673.8   | 1,329.5 | 1,328.6 | E  | 2,395.1 | 1,198.1 | 2,378.1 | 2,377.1 | 21  |
| 13  | 1,459.7 | 730.3   | 1,442.6 | 1,441.6 | I  | 2,266.1 | 1,133.6 | 2,249.1 | 2,248.1 | 20  |
| 14  | 1,596.7 | 798.9   | 1,579.7 | 1,578.7 | H  | 2,153.0 | 1,077.0 | 2,136.0 | 2,135.0 | 19  |
| 15  | 1,725.8 | 863.4   | 1,708.7 | 1,707.7 | E  | 2,016.0 | 1,008.5 | 1,998.9 | 1,998.0 | 18  |
| 16  | 1,888.8 | 944.9   | 1,871.8 | 1,870.8 | Y  | 1,886.9 | 944.0   | 1,869.9 | 1,868.9 | 17  |
| 17  | 2,001.9 | 1,001.5 | 1,984.9 | 1,983.9 | L  | 1,723.9 | 862.4   | 1,706.8 | 1,705.8 | 16  |
| 18  | 2,088.9 | 1,045.0 | 2,071.9 | 2,070.9 | S  | 1,610.8 | 805.9   | 1,593.7 | 1,592.8 | 15  |
| 19  | 2,160.0 | 1,090.5 | 2,143.0 | 2,142.0 | A  | 1,523.7 | 762.4   | 1,506.7 | 1,505.7 | 14  |
| 20  | 2,307.0 | 1,154.0 | 2,290.0 | 2,289.0 | F  | 1,452.7 | 726.9   | 1,435.7 | 1,434.7 | 13  |
| 21  | 2,436.1 | 1,218.5 | 2,419.1 | 2,418.1 | E  | 1,305.6 | 653.3   | 1,288.6 | 1,287.6 | 12  |
| 22  | 2,550.1 | 1,275.6 | 2,533.1 | 2,532.1 | N  | 1,176.6 | 588.8   | 1,159.6 | 1,158.6 | 11  |
| 23  | 2,637.2 | 1,319.1 | 2,620.1 | 2,619.2 | S  | 1,062.6 | 531.8   | 1,045.5 | 1,044.5 | 10  |
| 24  | 2,750.2 | 1,375.6 | 2,733.2 | 2,732.2 | I  | 975.5   | 488.3   | 958.5   | 957.5   | 9   |
| 25  | 2,807.3 | 1,404.1 | 2,790.2 | 2,789.3 | G  | 862.4   | 431.7   | 845.4   | 844.4   | 8   |
| 26  | 2,878.3 | 1,439.7 | 2,861.3 | 2,860.3 | A  | 805.4   | 403.2   | 788.4   | 787.4   | 7   |
| 27  | 2,977.4 | 1,489.2 | 2,960.3 | 2,959.4 | V  | 734.4   | 367.7   | 717.3   | 716.4   | 6   |
| 28  | 3,092.4 | 1,546.7 | 3,075.4 | 3,074.4 | D  | 635.3   |         | 618.3   | 617.3   | 5   |
| 29  | 3,221.4 | 1,611.2 | 3,204.4 | 3,203.4 | E  | 520.3   |         | 503.3   | 502.3   | 4   |
| 30  | 3,352.5 | 1,676.7 | 3,335.5 | 3,334.5 | M  | 391.2   |         | 374.2   |         | 3   |
| 31  | 3,465.6 | 1,733.3 | 3,448.5 | 3,447.6 | L  | 260.2   |         | 243.2   |         | 2   |
| 32  | 3,611.7 | 1,806.3 | 3,594.6 | 3,593.7 | K  | 147.1   |         | 130.1   |         | 1   |

# Nuclear proteome

| Protein No. | Leading protein name | Sequence        | Mascot Score | Variable Modifications  | SILAC State | Charge | m/z      |
|-------------|----------------------|-----------------|--------------|-------------------------|-------------|--------|----------|
| N-29        | sp P08047 SP1_HUMAN  | SDQDHSMDEMTAVVK | 84.92        | Acetyl (Protein N-term) | Light       | 2      | 867.8691 |

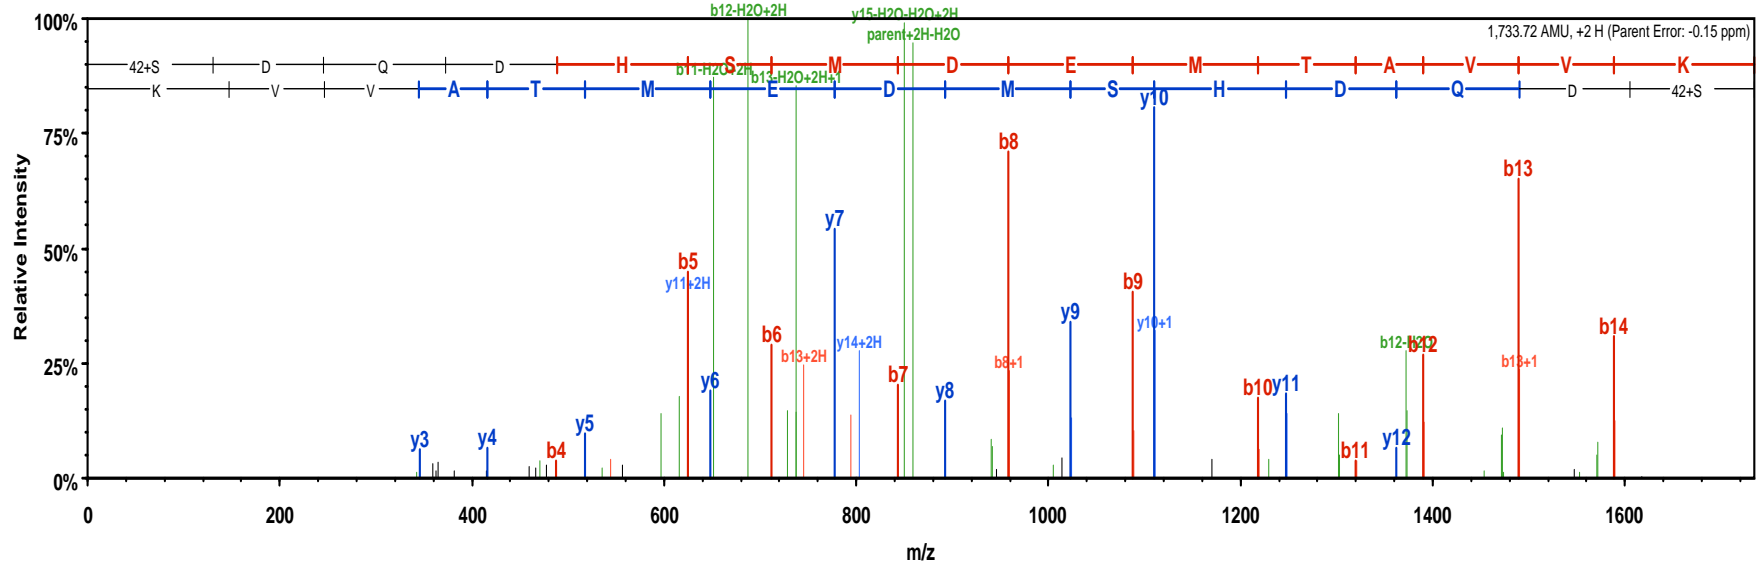

| ... | B Ions  | B+2H  | B-NH3   | B-H2O   | AA   | Y Ions  | Y+2H  | Y-NH3   | Y-H2O   | ... |
|-----|---------|-------|---------|---------|------|---------|-------|---------|---------|-----|
| 1   | 130.0   |       |         | 112.0   | S+42 | 1,734.7 | 867.9 | 1,717.7 | 1,716.7 | 15  |
| 2   | 245.1   |       |         | 227.1   | D    | 1,605.7 | 803.3 | 1,588.7 | 1,587.7 | 14  |
| 3   | 373.1   |       | 356.1   | 355.1   | Q    | 1,490.7 | 745.8 | 1,473.6 | 1,472.7 | 13  |
| 4   | 488.2   |       | 471.1   | 470.2   | D    | 1,362.6 | 681.8 | 1,345.6 | 1,344.6 | 12  |
| 5   | 625.2   | 313.1 | 608.2   | 607.2   | H    | 1,247.6 | 624.3 | 1,230.5 | 1,229.6 | 11  |
| 6   | 712.3   | 356.6 | 695.2   | 694.2   | S    | 1,110.5 | 555.8 | 1,093.5 | 1,092.5 | 10  |
| 7   | 843.3   | 422.2 | 826.3   | 825.3   | M    | 1,023.5 | 512.2 | 1,006.5 | 1,005.5 | 9   |
| 8   | 958.3   | 479.7 | 941.3   | 940.3   | D    | 892.4   | 446.7 | 875.4   | 874.4   | 8   |
| 9   | 1,087.4 | 544.2 | 1,070.3 | 1,069.4 | E    | 777.4   | 389.2 | 760.4   | 759.4   | 7   |
| 10  | 1,218.4 | 609.7 | 1,201.4 | 1,200.4 | M    | 648.4   | 324.7 | 631.3   | 630.4   | 6   |
| 11  | 1,319.5 | 660.2 | 1,302.4 | 1,301.4 | T    | 517.3   |       | 500.3   | 499.3   | 5   |
| 12  | 1,390.5 | 695.7 | 1,373.5 | 1,372.5 | A    | 416.3   |       | 399.3   |         | 4   |
| 13  | 1,489.6 | 745.3 | 1,472.5 | 1,471.5 | V    | 345.2   |       | 328.2   |         | 3   |
| 14  | 1,588.6 | 794.8 | 1,571.6 | 1,570.6 | V    | 246.2   |       | 229.2   |         | 2   |
| 15  | 1,734.7 | 867.9 | 1,717.7 | 1,716.7 | K    | 147.1   |       | 130.1   |         | 1   |

# Nuclear proteome

| Protein No. | Leading protein name  | Sequence           | Mascot Score | Variable Modifications | SILAC State | Charge | m/z       |
|-------------|-----------------------|--------------------|--------------|------------------------|-------------|--------|-----------|
| N-30        | sp Q96S66 CLCC1_HUMAN | DVSPDLSCADEISECYHK | 83.52        | Unmodified             | Light       | 2      | 1062.9461 |

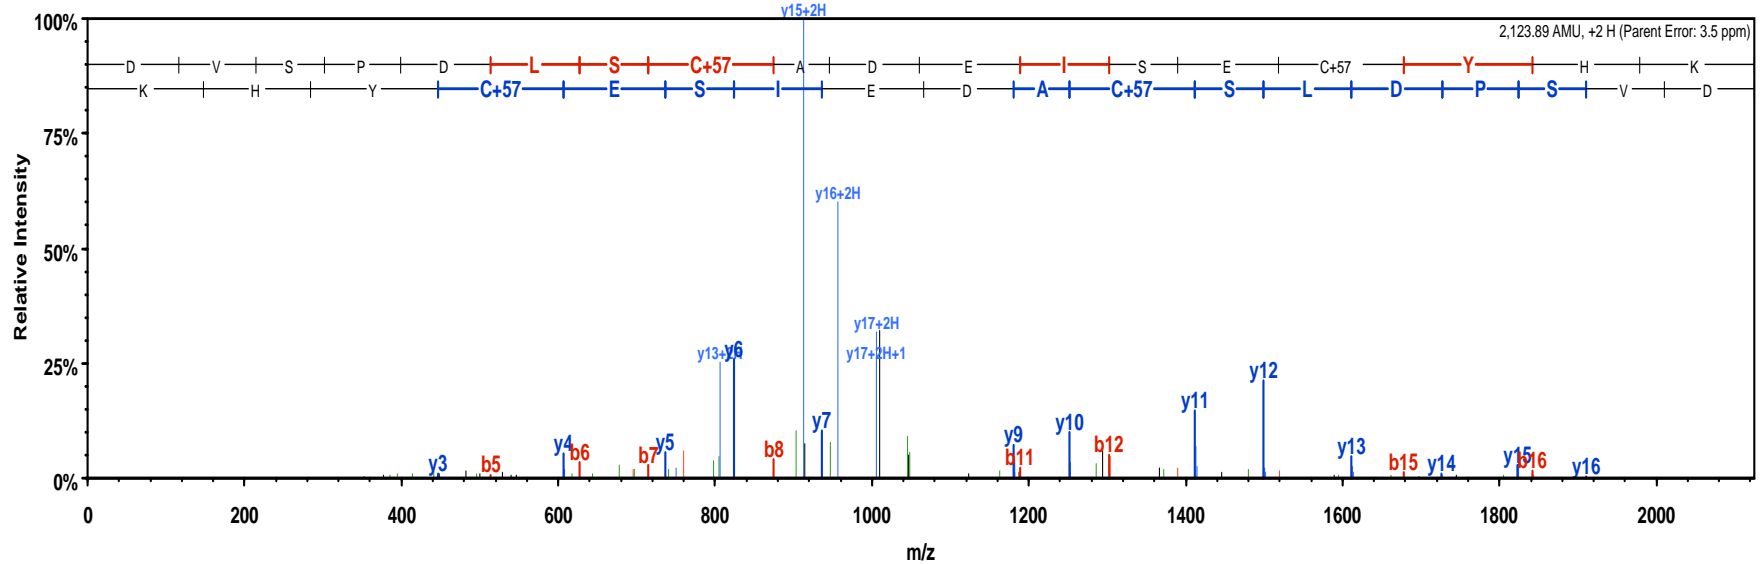

| ... | B Ions  | B+2H    | B-NH3   | B-H2O   | AA   | Y Ions  | Y+2H    | Y-MH3   | Y-H2O   | ... |
|-----|---------|---------|---------|---------|------|---------|---------|---------|---------|-----|
| 1   | 116.0   |         |         | 98.0    | D    | 2,124.9 | 1,062.9 | 2,107.9 | 2,106.9 | 18  |
| 2   | 215.1   |         |         | 197.1   | V    | 2,009.9 | 1,005.4 | 1,992.8 | 1,991.8 | 17  |
| 3   | 302.1   |         |         | 284.1   | S    | 1,910.8 | 955.9   | 1,893.8 | 1,892.8 | 16  |
| 4   | 399.2   |         |         | 381.2   | P    | 1,823.8 | 912.4   | 1,806.7 | 1,805.7 | 15  |
| 5   | 514.2   |         |         | 496.2   | D    | 1,726.7 | 863.9   | 1,709.7 | 1,708.7 | 14  |
| 6   | 627.3   | 314.2   |         | 609.3   | L    | 1,611.7 | 806.3   | 1,594.7 | 1,593.7 | 13  |
| 7   | 714.3   | 357.7   |         | 696.3   | S    | 1,498.6 | 749.8   | 1,481.6 | 1,480.6 | 12  |
| 8   | 874.4   | 437.7   |         | 856.4   | C+57 | 1,411.6 | 706.3   | 1,394.5 | 1,393.6 | 11  |
| 9   | 945.4   | 473.2   |         | 927.4   | A    | 1,251.5 | 626.3   | 1,234.5 | 1,233.5 | 10  |
| 10  | 1,060.4 | 530.7   |         | 1,042.4 | D    | 1,180.5 | 590.8   | 1,163.5 | 1,162.5 | 9   |
| 11  | 1,189.5 | 595.2   |         | 1,171.5 | E    | 1,065.5 | 533.2   | 1,048.4 | 1,047.5 | 8   |
| 12  | 1,302.6 | 651.8   |         | 1,284.5 | I    | 936.4   | 468.7   | 919.4   | 918.4   | 7   |
| 13  | 1,389.6 | 695.3   |         | 1,371.6 | S    | 823.3   | 412.2   | 806.3   | 805.3   | 6   |
| 14  | 1,518.6 | 759.8   |         | 1,500.6 | E    | 736.3   | 368.7   | 719.3   | 718.3   | 5   |
| 15  | 1,678.7 | 839.8   |         | 1,660.6 | C+57 | 607.3   | 304.1   | 590.2   |         | 4   |
| 16  | 1,841.7 | 921.4   |         | 1,823.7 | Y    | 447.2   | 224.1   | 430.2   |         | 3   |
| 17  | 1,978.8 | 989.9   |         | 1,960.8 | H    | 284.2   | 142.6   | 267.1   |         | 2   |
| 18  | 2,124.9 | 1,062.9 | 2,107.9 | 2,106.9 | K    | 147.1   |         | 130.1   |         | 1   |

# Nuclear proteome

| Protein No. | Leading protein name   | Sequence               | Mascot Score | Variable Modifications | SILAC State | Charge | m/z       |
|-------------|------------------------|------------------------|--------------|------------------------|-------------|--------|-----------|
| N-31        | sp Q9P0P8 ICF203_HUMAN | VGDTLDLLIGEDKEAGTETVMR | 82.79        | Unmodified             | Light       | 3      | 788.06506 |

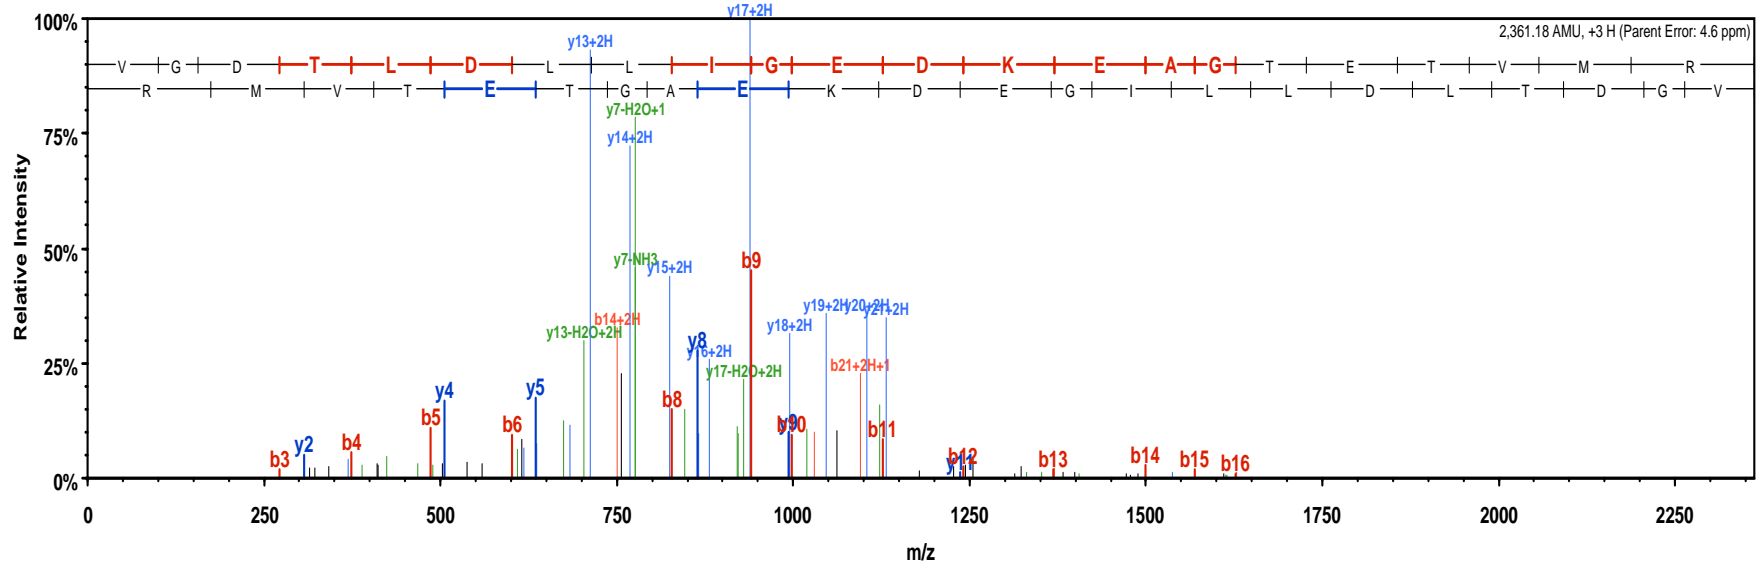

| ... | B Ions  | B+2H    | B-NH3   | B-H2O   | AA | Y Ions  | Y+2H    | Y-NH3   | Y-H2O   | ... |
|-----|---------|---------|---------|---------|----|---------|---------|---------|---------|-----|
| 1   | 100.1   |         |         |         | V  | 2,362.2 | 1,181.6 | 2,345.2 | 2,344.2 | 22  |
| 2   | 157.1   |         |         |         | G  | 2,263.1 | 1,132.1 | 2,246.1 | 2,245.1 | 21  |
| 3   | 272.1   |         |         | 254.1   | D  | 2,206.1 | 1,103.5 | 2,189.1 | 2,188.1 | 20  |
| 4   | 373.2   |         |         | 355.2   | T  | 2,091.1 | 1,046.0 | 2,074.0 | 2,073.1 | 19  |
| 5   | 486.3   |         |         | 468.2   | L  | 1,990.0 | 995.5   | 1,973.0 | 1,972.0 | 18  |
| 6   | 601.3   | 301.1   |         | 583.3   | D  | 1,876.9 | 939.0   | 1,859.9 | 1,858.9 | 17  |
| 7   | 714.4   | 357.7   |         | 696.4   | L  | 1,761.9 | 881.5   | 1,744.9 | 1,743.9 | 16  |
| 8   | 827.5   | 414.2   |         | 809.4   | L  | 1,648.8 | 824.9   | 1,631.8 | 1,630.8 | 15  |
| 9   | 940.5   | 470.8   |         | 922.5   | I  | 1,535.7 | 768.4   | 1,518.7 | 1,517.7 | 14  |
| 10  | 997.6   | 499.3   |         | 979.5   | G  | 1,422.7 | 711.8   | 1,405.6 | 1,404.6 | 13  |
| 11  | 1,126.6 | 563.8   |         | 1,108.6 | E  | 1,365.6 | 683.3   | 1,348.6 | 1,347.6 | 12  |
| 12  | 1,241.6 | 621.3   |         | 1,223.6 | D  | 1,236.6 | 618.8   | 1,219.6 | 1,218.6 | 11  |
| 13  | 1,369.7 | 685.4   | 1,352.7 | 1,351.7 | K  | 1,121.6 | 561.3   | 1,104.5 | 1,103.6 | 10  |
| 14  | 1,498.8 | 749.9   | 1,481.7 | 1,480.8 | E  | 993.5   | 497.2   | 976.4   | 975.5   | 9   |
| 15  | 1,569.8 | 785.4   | 1,552.8 | 1,551.8 | A  | 864.4   | 432.7   | 847.4   | 846.4   | 8   |
| 16  | 1,626.8 | 813.9   | 1,609.8 | 1,608.8 | G  | 793.4   | 397.2   | 776.4   | 775.4   | 7   |
| 17  | 1,727.9 | 864.4   | 1,710.8 | 1,709.9 | T  | 736.4   | 368.7   | 719.3   | 718.4   | 6   |
| 18  | 1,856.9 | 929.0   | 1,839.9 | 1,838.9 | E  | 635.3   |         | 618.3   | 617.3   | 5   |
| 19  | 1,958.0 | 979.5   | 1,940.9 | 1,939.9 | T  | 506.3   |         | 489.2   | 488.3   | 4   |
| 20  | 2,057.0 | 1,029.0 | 2,040.0 | 2,039.0 | V  | 405.2   |         | 388.2   |         | 3   |
| 21  | 2,188.1 | 1,094.5 | 2,171.0 | 2,170.1 | M  | 306.2   |         | 289.1   |         | 2   |
| 22  | 2,362.2 | 1,181.6 | 2,345.2 | 2,344.2 | R  | 175.1   |         | 158.1   |         | 1   |



# Nuclear proteome

| Protein No. | Leading protein name | Sequence                         | Mascot Score | Variable Modifications | SILAC State | Charge | m/z       |
|-------------|----------------------|----------------------------------|--------------|------------------------|-------------|--------|-----------|
| N-32        | sp P68431 H31_HUMAN  | FQSSAVMALQEACEAYLVGLFEDTNLCAIHAK | 80.49        | Oxidation (M)          | Light       | 3      | 1201.5703 |

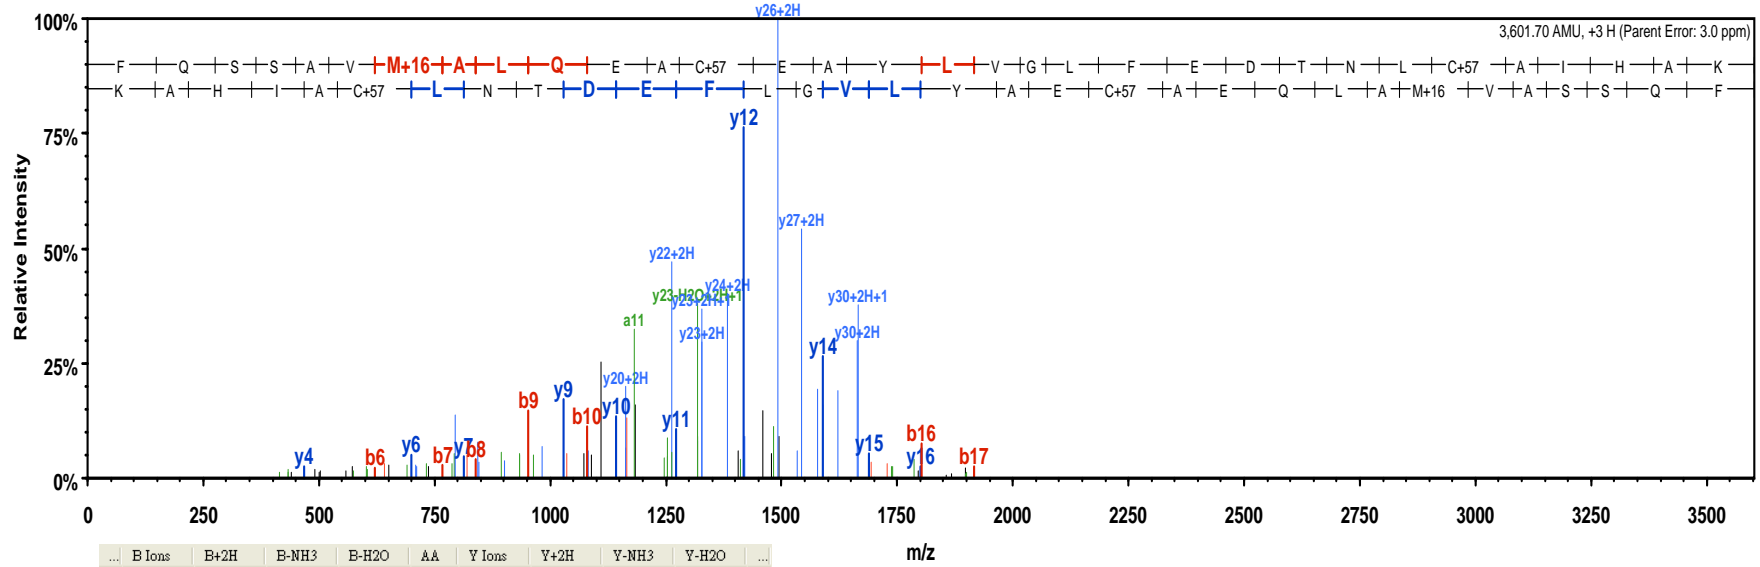

| ... | B Ions  | E+2H    | B-NH3   | E-H2O   | AA   | Y Ions  | Y+2H    | Y-NH3   | Y-H2O   | ... |
|-----|---------|---------|---------|---------|------|---------|---------|---------|---------|-----|
| 1   | 148.1   |         |         |         | F    | 3,602.7 | 1,801.9 | 3,585.7 | 3,584.7 | 32  |
| 2   | 276.1   |         | 259.1   |         | Q    | 3,455.6 | 1,728.3 | 3,438.6 | 3,437.6 | 31  |
| 3   | 363.2   |         | 346.1   | 345.2   | S    | 3,327.6 | 1,664.3 | 3,310.5 | 3,309.6 | 30  |
| 4   | 450.2   |         | 433.2   | 432.2   | S    | 3,240.5 | 1,620.8 | 3,223.5 | 3,222.5 | 29  |
| 5   | 521.2   |         | 504.2   | 503.2   | A    | 3,153.5 | 1,577.3 | 3,136.5 | 3,135.5 | 28  |
| 6   | 620.3   | 310.7   | 603.3   | 602.3   | V    | 3,082.5 | 1,541.7 | 3,065.4 | 3,064.5 | 27  |
| 7   | 767.3   | 384.2   | 750.3   | 749.3   | M+16 | 2,983.4 | 1,492.2 | 2,966.4 | 2,965.4 | 26  |
| 8   | 838.4   | 419.7   | 821.3   | 820.4   | A    | 2,836.4 | 1,418.7 | 2,819.3 | 2,818.4 | 25  |
| 9   | 951.5   | 476.2   | 934.4   | 933.4   | L    | 2,765.3 | 1,383.2 | 2,748.3 | 2,747.3 | 24  |
| 10  | 1,079.5 | 540.3   | 1,062.5 | 1,061.5 | Q    | 2,652.2 | 1,326.6 | 2,635.2 | 2,634.2 | 23  |
| 11  | 1,208.6 | 604.8   | 1,191.5 | 1,190.6 | E    | 2,524.2 | 1,262.6 | 2,507.2 | 2,506.2 | 22  |
| 12  | 1,279.6 | 640.3   | 1,262.6 | 1,261.6 | A    | 2,395.1 | 1,198.1 | 2,378.1 | 2,377.1 | 21  |
| 13  | 1,439.6 | 720.3   | 1,422.6 | 1,421.6 | C+57 | 2,324.1 | 1,162.6 | 2,307.1 | 2,306.1 | 20  |
| 14  | 1,568.7 | 784.8   | 1,551.6 | 1,550.7 | E    | 2,164.1 | 1,082.5 | 2,147.0 | 2,146.1 | 19  |
| 15  | 1,639.7 | 820.4   | 1,622.7 | 1,621.7 | A    | 2,035.0 | 1,018.0 | 2,018.0 | 2,017.0 | 18  |
| 16  | 1,802.8 | 901.9   | 1,785.7 | 1,784.8 | Y    | 1,964.0 | 982.5   | 1,947.0 | 1,946.0 | 17  |
| 17  | 1,915.9 | 958.4   | 1,898.8 | 1,897.8 | L    | 1,800.9 | 901.0   | 1,783.9 | 1,782.9 | 16  |
| 18  | 2,014.9 | 1,008.0 | 1,997.9 | 1,996.9 | V    | 1,687.8 | 844.4   | 1,670.8 | 1,669.8 | 15  |
| 19  | 2,071.9 | 1,036.5 | 2,054.9 | 2,053.9 | G    | 1,588.8 | 794.9   | 1,571.8 | 1,570.8 | 14  |
| 20  | 2,185.0 | 1,093.0 | 2,168.0 | 2,167.0 | L    | 1,531.8 | 766.4   | 1,514.7 | 1,513.7 | 13  |
| 21  | 2,332.1 | 1,166.6 | 2,315.1 | 2,314.1 | F    | 1,418.7 | 709.8   | 1,401.6 | 1,400.7 | 12  |
| 22  | 2,461.1 | 1,231.1 | 2,444.1 | 2,443.1 | E    | 1,271.6 | 636.3   | 1,254.6 | 1,253.6 | 11  |
| 23  | 2,576.2 | 1,288.6 | 2,559.1 | 2,558.2 | D    | 1,142.6 | 571.8   | 1,125.5 | 1,124.6 | 10  |
| 24  | 2,677.2 | 1,339.1 | 2,660.2 | 2,659.2 | T    | 1,027.5 | 514.3   | 1,010.5 | 1,009.5 | 9   |
| 25  | 2,791.3 | 1,396.1 | 2,774.2 | 2,773.2 | N    | 926.5   | 463.7   | 909.5   |         | 8   |
| 26  | 2,904.3 | 1,452.7 | 2,887.3 | 2,886.3 | L    | 812.4   | 406.7   | 795.4   |         | 7   |
| 27  | 3,064.4 | 1,532.7 | 3,047.3 | 3,046.4 | C+57 | 699.4   | 350.2   | 682.3   |         | 6   |
| 28  | 3,135.4 | 1,568.2 | 3,118.4 | 3,117.4 | A    | 539.3   | 270.2   | 522.3   |         | 5   |
| 29  | 3,248.5 | 1,624.8 | 3,231.5 | 3,230.5 | I    | 468.3   | 234.7   | 451.3   |         | 4   |
| 30  | 3,385.6 | 1,693.3 | 3,368.5 | 3,367.5 | H    | 355.2   | 178.1   | 338.2   |         | 3   |
| 31  | 3,456.6 | 1,728.8 | 3,439.6 | 3,438.6 | A    | 218.1   |         | 201.1   |         | 2   |
| 32  | 3,602.7 | 1,801.9 | 3,585.7 | 3,584.7 | K    | 147.1   |         | 130.1   |         | 1   |

# Nuclear proteome

| Protein No. | Leading protein name  | Sequence            | Mascot Score | Variable Modifications | SILAC State | Charge | m/z       |
|-------------|-----------------------|---------------------|--------------|------------------------|-------------|--------|-----------|
| N-33        | sp Q6P996 PDXD1_HUMAN | GSDALSETSSVSHIEDLEK | 80.08        | Unmodified             | Light       | 2      | 1002.4738 |

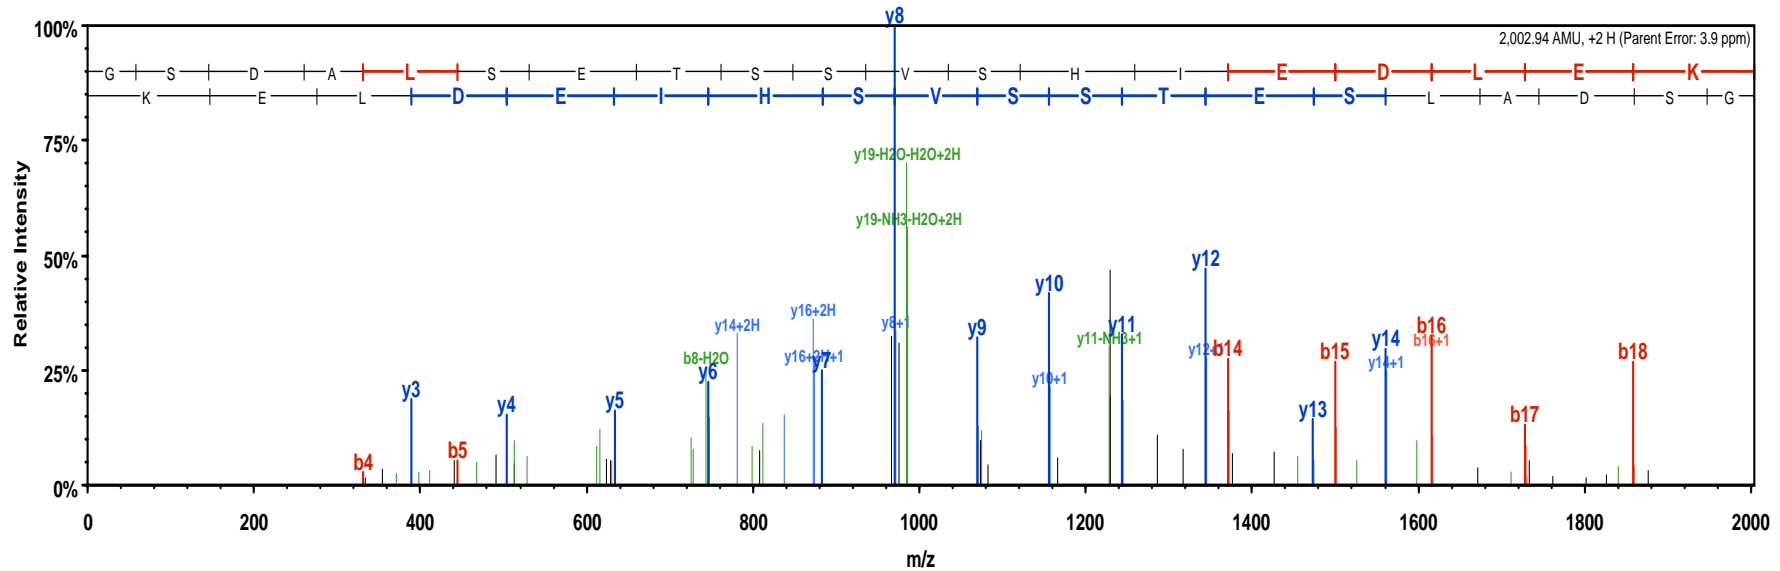

| ... | B Ions  | B+2H    | B-NH3   | B-H2O   | AA | Y Ions  | Y+2H    | Y-NH3   | Y-H2O   | ... |
|-----|---------|---------|---------|---------|----|---------|---------|---------|---------|-----|
| 1   | 58.0    |         |         |         | G  | 2,003.9 | 1,002.5 | 1,986.9 | 1,985.9 | 19  |
| 2   | 145.1   |         |         | 127.1   | S  | 1,946.9 | 974.0   | 1,929.9 | 1,928.9 | 18  |
| 3   | 260.1   |         |         | 242.1   | D  | 1,859.9 | 930.4   | 1,842.9 | 1,841.9 | 17  |
| 4   | 331.1   |         |         | 313.1   | A  | 1,744.9 | 872.9   | 1,727.8 | 1,726.8 | 16  |
| 5   | 444.2   |         |         | 426.2   | L  | 1,673.8 | 837.4   | 1,656.8 | 1,655.8 | 15  |
| 6   | 531.2   | 266.1   |         | 513.2   | S  | 1,560.7 | 780.9   | 1,543.7 | 1,542.7 | 14  |
| 7   | 660.3   | 330.6   |         | 642.3   | E  | 1,473.7 | 737.4   | 1,456.7 | 1,455.7 | 13  |
| 8   | 761.3   | 381.2   |         | 743.3   | T  | 1,344.7 | 672.8   | 1,327.6 | 1,326.7 | 12  |
| 9   | 848.4   | 424.7   |         | 830.4   | S  | 1,243.6 | 622.3   | 1,226.6 | 1,225.6 | 11  |
| 10  | 935.4   | 468.2   |         | 917.4   | S  | 1,156.6 | 578.8   | 1,139.6 | 1,138.6 | 10  |
| 11  | 1,034.5 | 517.7   |         | 1,016.5 | V  | 1,069.6 | 535.3   | 1,052.5 | 1,051.5 | 9   |
| 12  | 1,121.5 | 561.3   |         | 1,103.5 | S  | 970.5   | 485.7   | 953.5   | 952.5   | 8   |
| 13  | 1,258.6 | 629.8   |         | 1,240.5 | H  | 883.5   | 442.2   | 866.4   | 865.4   | 7   |
| 14  | 1,371.6 | 686.3   |         | 1,353.6 | I  | 746.4   | 373.7   | 729.4   | 728.4   | 6   |
| 15  | 1,500.7 | 750.8   |         | 1,482.7 | E  | 633.3   |         | 616.3   | 615.3   | 5   |
| 16  | 1,615.7 | 808.4   |         | 1,597.7 | D  | 504.3   |         | 487.2   | 486.3   | 4   |
| 17  | 1,728.8 | 864.9   |         | 1,710.8 | L  | 389.2   |         | 372.2   | 371.2   | 3   |
| 18  | 1,857.8 | 929.4   |         | 1,839.8 | E  | 276.2   |         | 259.1   | 258.1   | 2   |
| 19  | 2,003.9 | 1,002.5 | 1,986.9 | 1,985.9 | K  | 147.1   |         | 130.1   |         | 1   |

# Nuclear proteome

| Protein No. | Leading protein name  | Sequence                      | Mascot Score | Variable Modifications | SILAC State | Charge | m/z       |
|-------------|-----------------------|-------------------------------|--------------|------------------------|-------------|--------|-----------|
| N-34        | sp O00622 CYR61_HUMAN | VTGQCCEEWVCDSDSIKDPMEDQDGLLGK | 80.02        | Unmodified             | Light       | 3      | 1138.4807 |

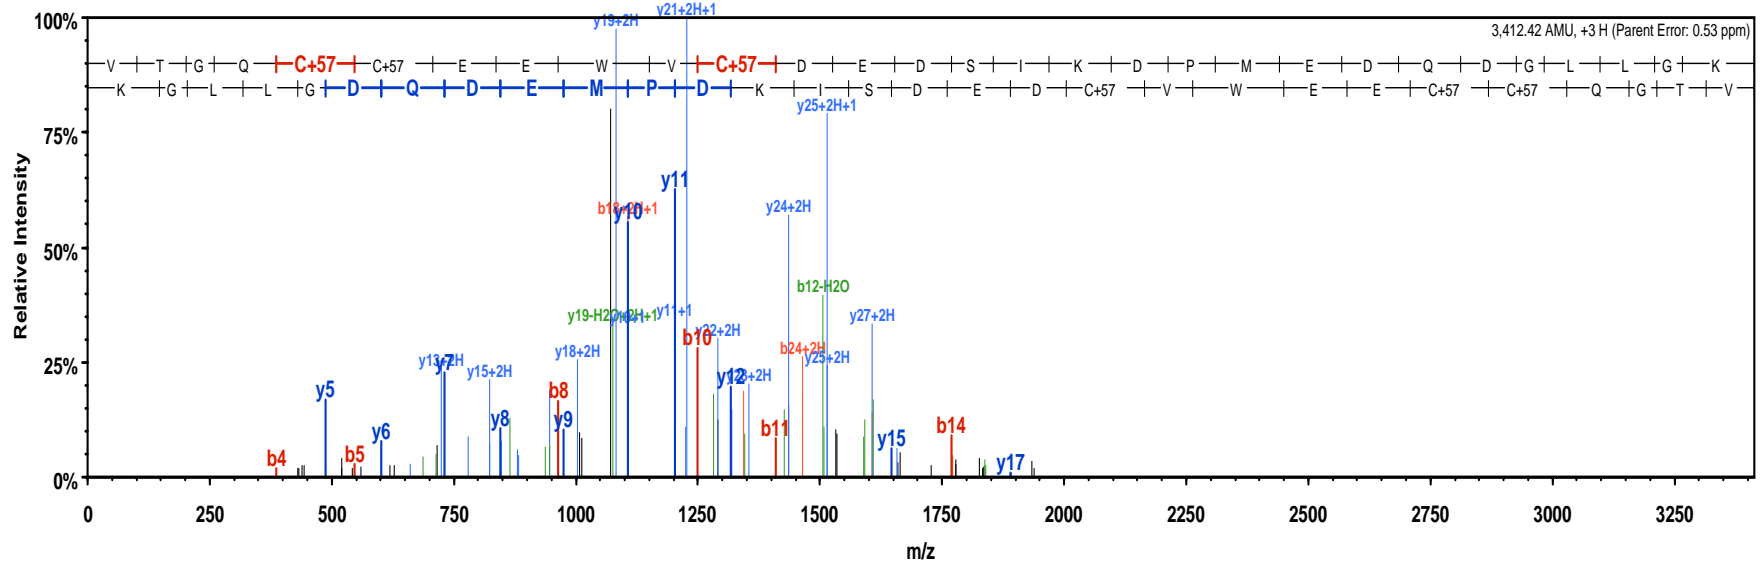

| ... | B Ions  | B+2H    | B-NH3   | B-H2O   | AA   | Y Ions  | Y+2H    | Y-NH3   | Y-H2O   | ... |
|-----|---------|---------|---------|---------|------|---------|---------|---------|---------|-----|
| 1   | 100.1   |         |         |         | V    | 3,413.4 | 1,707.2 | 3,396.4 | 3,395.4 | 29  |
| 2   | 201.1   |         |         | 183.1   | T    | 3,314.4 | 1,657.7 | 3,297.3 | 3,296.3 | 28  |
| 3   | 258.1   |         |         | 240.1   | G    | 3,213.3 | 1,607.2 | 3,196.3 | 3,195.3 | 27  |
| 4   | 386.2   |         | 369.2   | 368.2   | Q    | 3,156.3 | 1,578.6 | 3,139.3 | 3,138.3 | 26  |
| 5   | 546.2   |         | 529.2   | 528.2   | C+57 | 3,028.2 | 1,514.6 | 3,011.2 | 3,010.2 | 25  |
| 6   | 706.3   | 353.6   | 689.2   | 688.3   | C+57 | 2,868.2 | 1,434.6 | 2,851.2 | 2,850.2 | 24  |
| 7   | 835.3   | 418.2   | 818.3   | 817.3   | E    | 2,708.2 | 1,354.6 | 2,691.1 | 2,690.2 | 23  |
| 8   | 964.3   | 482.7   | 947.3   | 946.3   | E    | 2,579.1 | 1,290.1 | 2,562.1 | 2,561.1 | 22  |
| 9   | 1,150.4 | 575.7   | 1,133.4 | 1,132.4 | W    | 2,450.1 | 1,225.5 | 2,433.1 | 2,432.1 | 21  |
| 10  | 1,249.5 | 625.3   | 1,232.5 | 1,231.5 | V    | 2,264.0 | 1,132.5 | 2,247.0 | 2,246.0 | 20  |
| 11  | 1,409.5 | 705.3   | 1,392.5 | 1,391.5 | C+57 | 2,164.9 | 1,083.0 | 2,147.9 | 2,146.9 | 19  |
| 12  | 1,524.6 | 762.8   | 1,507.5 | 1,506.5 | D    | 2,004.9 | 1,003.0 | 1,987.9 | 1,986.9 | 18  |
| 13  | 1,653.6 | 827.3   | 1,636.6 | 1,635.6 | E    | 1,889.9 | 945.4   | 1,872.9 | 1,871.9 | 17  |
| 14  | 1,768.6 | 884.8   | 1,751.6 | 1,750.6 | D    | 1,760.8 | 880.9   | 1,743.8 | 1,742.8 | 16  |
| 15  | 1,855.7 | 928.3   | 1,838.6 | 1,837.6 | S    | 1,645.8 | 823.4   | 1,628.8 | 1,627.8 | 15  |
| 16  | 1,968.7 | 984.9   | 1,951.7 | 1,950.7 | I    | 1,558.8 | 779.9   | 1,541.8 | 1,540.8 | 14  |
| 17  | 2,096.8 | 1,048.9 | 2,079.8 | 2,078.8 | K    | 1,445.7 | 723.4   | 1,428.7 | 1,427.7 | 13  |
| 18  | 2,211.9 | 1,106.4 | 2,194.8 | 2,193.9 | D    | 1,317.6 | 659.3   | 1,300.6 | 1,299.6 | 12  |
| 19  | 2,308.9 | 1,155.0 | 2,291.9 | 2,290.9 | P    | 1,202.6 | 601.8   | 1,185.5 | 1,184.6 | 11  |
| 20  | 2,440.0 | 1,220.5 | 2,422.9 | 2,421.9 | M    | 1,105.5 | 553.3   | 1,088.5 | 1,087.5 | 10  |
| 21  | 2,569.0 | 1,285.0 | 2,552.0 | 2,551.0 | E    | 974.5   | 487.7   | 957.5   | 956.5   | 9   |
| 22  | 2,684.0 | 1,342.5 | 2,667.0 | 2,666.0 | D    | 845.4   | 423.2   | 828.4   | 827.4   | 8   |
| 23  | 2,812.1 | 1,406.5 | 2,795.1 | 2,794.1 | Q    | 730.4   | 365.7   | 713.4   | 712.4   | 7   |
| 24  | 2,927.1 | 1,464.1 | 2,910.1 | 2,909.1 | D    | 602.4   | 301.7   | 585.3   | 584.3   | 6   |
| 25  | 2,984.1 | 1,492.6 | 2,967.1 | 2,966.1 | G    | 487.3   |         | 470.3   |         | 5   |
| 26  | 3,097.2 | 1,549.1 | 3,080.2 | 3,079.2 | L    | 430.3   |         | 413.3   |         | 4   |
| 27  | 3,210.3 | 1,605.7 | 3,193.3 | 3,192.3 | L    | 317.2   |         | 300.2   |         | 3   |
| 28  | 3,267.3 | 1,634.2 | 3,250.3 | 3,249.3 | G    | 204.1   |         | 187.1   |         | 2   |
| 29  | 3,413.4 | 1,707.2 | 3,396.4 | 3,395.4 | K    | 147.1   |         | 130.1   |         | 1   |

# Nuclear proteome

| Protein No. | Leading protein name | Sequence                | Mascot Score | Variable Modifications | SILAC State | Charge | m/z       |
|-------------|----------------------|-------------------------|--------------|------------------------|-------------|--------|-----------|
| N-35        | spIP16104IH2AX_HUMAN | LLGGVTIAQGGVLPNIQAVLLPK | 79.25        | Unmodified             | Light       | 2      | 1136.1936 |

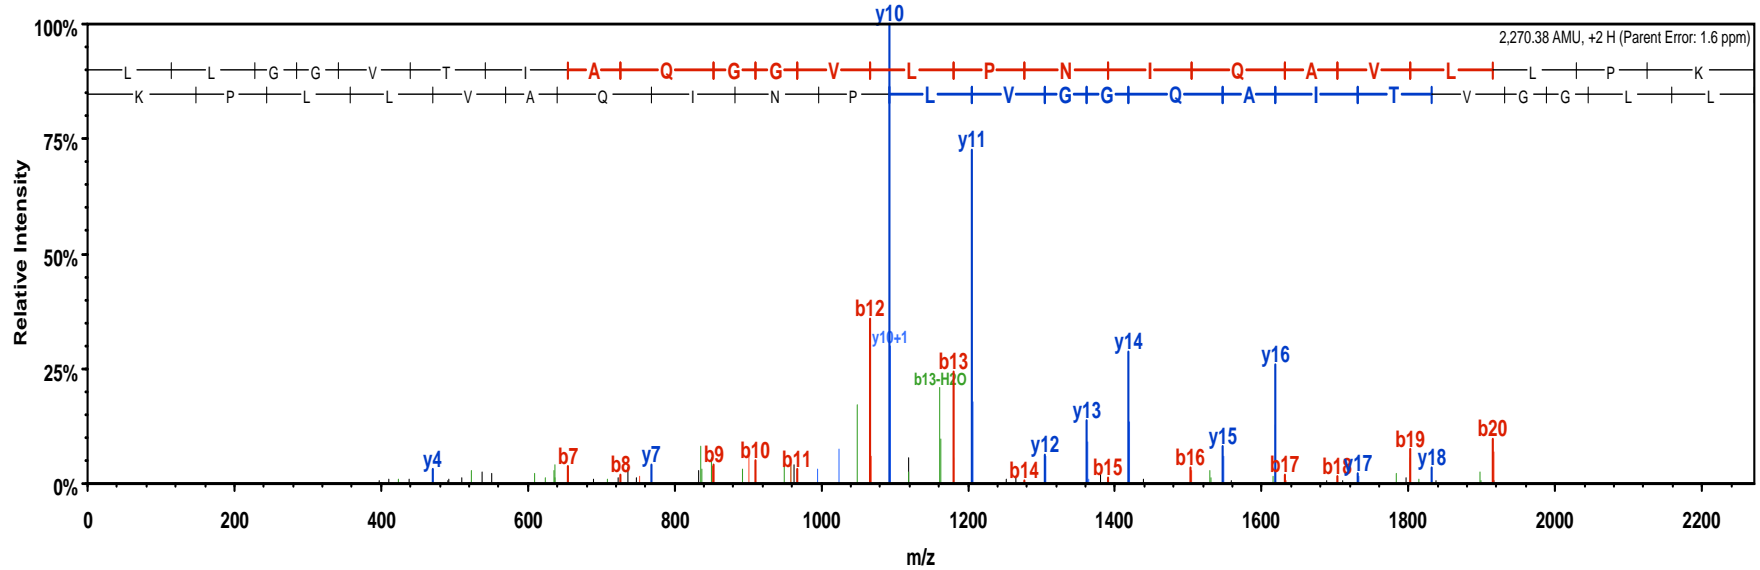

| ... | B Ions  | B+2H    | B-NH3   | B-H2O   | AA | Y Ions  | Y+2H    | Y-NH3   | Y-H2O   | ... |
|-----|---------|---------|---------|---------|----|---------|---------|---------|---------|-----|
| 1   | 114.1   |         |         |         | L  | 2,271.4 | 1,136.2 | 2,254.4 | 2,253.4 | 23  |
| 2   | 227.2   |         |         |         | L  | 2,158.3 | 1,079.7 | 2,141.3 | 2,140.3 | 22  |
| 3   | 284.2   |         |         |         | G  | 2,045.2 | 1,023.1 | 2,028.2 | 2,027.2 | 21  |
| 4   | 341.2   |         |         |         | G  | 1,988.2 | 994.6   | 1,971.2 | 1,970.2 | 20  |
| 5   | 440.3   |         |         |         | V  | 1,931.2 | 966.1   | 1,914.1 | 1,913.2 | 19  |
| 6   | 541.3   | 271.2   |         | 523.3   | T  | 1,832.1 | 916.6   | 1,815.1 | 1,814.1 | 18  |
| 7   | 654.4   | 327.7   |         | 636.4   | I  | 1,731.1 | 866.0   | 1,714.0 |         | 17  |
| 8   | 725.5   | 363.2   |         | 707.4   | A  | 1,618.0 | 809.5   | 1,600.9 |         | 16  |
| 9   | 853.5   | 427.3   | 836.5   | 835.5   | Q  | 1,546.9 | 774.0   | 1,529.9 |         | 15  |
| 10  | 910.5   | 455.8   | 893.5   | 892.5   | G  | 1,418.9 | 709.9   | 1,401.8 |         | 14  |
| 11  | 967.6   | 484.3   | 950.5   | 949.5   | G  | 1,361.9 | 681.4   | 1,344.8 |         | 13  |
| 12  | 1,066.6 | 533.8   | 1,049.6 | 1,048.6 | V  | 1,304.8 | 652.9   | 1,287.8 |         | 12  |
| 13  | 1,179.7 | 590.4   | 1,162.7 | 1,161.7 | L  | 1,205.8 | 603.4   | 1,188.7 |         | 11  |
| 14  | 1,276.8 | 638.9   | 1,259.7 | 1,258.8 | P  | 1,092.7 | 546.8   | 1,075.7 |         | 10  |
| 15  | 1,390.8 | 695.9   | 1,373.8 | 1,372.8 | N  | 995.6   | 498.3   | 978.6   |         | 9   |
| 16  | 1,503.9 | 752.4   | 1,486.9 | 1,485.9 | I  | 881.6   | 441.3   | 864.6   |         | 8   |
| 17  | 1,631.9 | 816.5   | 1,614.9 | 1,613.9 | Q  | 768.5   | 384.8   | 751.5   |         | 7   |
| 18  | 1,703.0 | 852.0   | 1,686.0 | 1,685.0 | A  | 640.4   | 320.7   | 623.4   |         | 6   |
| 19  | 1,802.1 | 901.5   | 1,785.0 | 1,784.0 | V  | 569.4   |         | 552.4   |         | 5   |
| 20  | 1,915.1 | 958.1   | 1,898.1 | 1,897.1 | L  | 470.3   |         | 453.3   |         | 4   |
| 21  | 2,028.2 | 1,014.6 | 2,011.2 | 2,010.2 | L  | 357.2   |         | 340.2   |         | 3   |
| 22  | 2,125.3 | 1,063.1 | 2,108.2 | 2,107.3 | P  | 244.2   |         | 227.1   |         | 2   |
| 23  | 2,271.4 | 1,136.2 | 2,254.4 | 2,253.4 | K  | 147.1   |         | 130.1   |         | 1   |

# Nuclear proteome

| Protein No. | Leading protein name  | Sequence      | Mascot Score | Variable Modifications  | SILAC State | Charge | m/z       |
|-------------|-----------------------|---------------|--------------|-------------------------|-------------|--------|-----------|
| N-36        | sp Q96HN2 SAHH3_HUMAN | SVQVVSA AAAAK | 78.3         | Acetyl (Protein N-term) | Heavy       | 2      | 572.32205 |

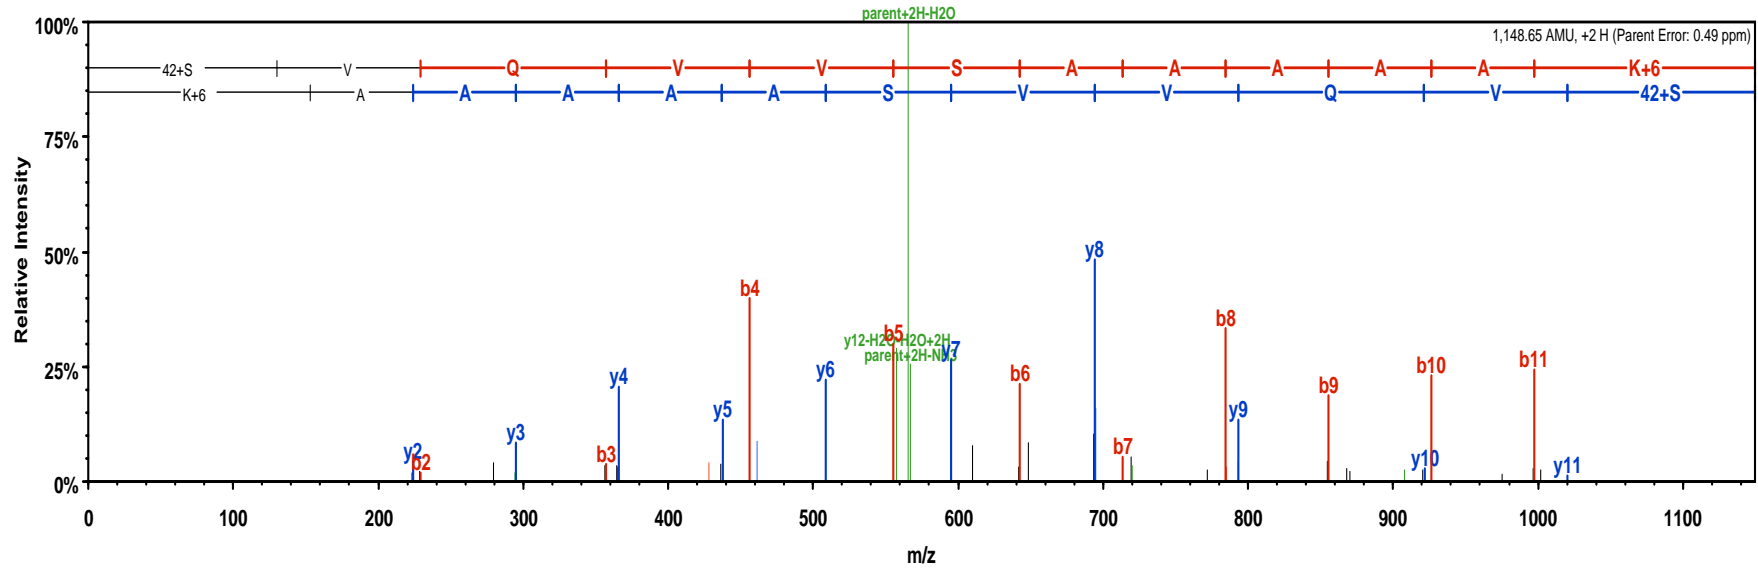

| ... | B Ions  | B+2H  | B-NH3   | B-H2O   | AA   | Y Ions  | Y+2H  | Y-NH3   | Y-H2O   | ... |
|-----|---------|-------|---------|---------|------|---------|-------|---------|---------|-----|
| 1   | 130.0   |       |         | 112.0   | S+42 | 1,149.7 | 575.3 | 1,132.6 | 1,131.6 | 12  |
| 2   | 229.1   |       |         | 211.1   | V    | 1,020.6 | 510.8 | 1,003.6 | 1,002.6 | 11  |
| 3   | 357.2   |       | 340.2   | 339.2   | Q    | 921.5   | 461.3 | 904.5   | 903.5   | 10  |
| 4   | 456.2   |       | 439.2   | 438.2   | V    | 793.5   | 397.2 | 776.5   | 775.5   | 9   |
| 5   | 555.3   |       | 538.3   | 537.3   | V    | 694.4   | 347.7 | 677.4   | 676.4   | 8   |
| 6   | 642.3   | 321.7 | 625.3   | 624.3   | S    | 595.4   | 298.2 | 578.3   | 577.3   | 7   |
| 7   | 713.4   | 357.2 | 696.4   | 695.4   | A    | 508.3   | 254.7 | 491.3   |         | 6   |
| 8   | 784.4   | 392.7 | 767.4   | 766.4   | A    | 437.3   |       | 420.3   |         | 5   |
| 9   | 855.5   | 428.2 | 838.4   | 837.4   | A    | 366.2   |       | 349.2   |         | 4   |
| 10  | 926.5   | 463.8 | 909.5   | 908.5   | A    | 295.2   |       | 278.2   |         | 3   |
| 11  | 997.5   | 499.3 | 980.5   | 979.5   | A    | 224.2   |       | 207.1   |         | 2   |
| 12  | 1,149.7 | 575.3 | 1,132.6 | 1,131.6 | K+6  | 153.1   |       | 136.1   |         | 1   |

# Nuclear proteome

| Protein No. | Leading protein name | Sequence        | Mascot Score | Variable Modifications  | SILAC State | Charge | m/z       |
|-------------|----------------------|-----------------|--------------|-------------------------|-------------|--------|-----------|
| N-37        | sp P06454 PTMA_HUMAN | SDAAVDTSSSEITTK | 77.07        | Acetyl (Protein N-term) | Heavy       | 2      | 733.84648 |

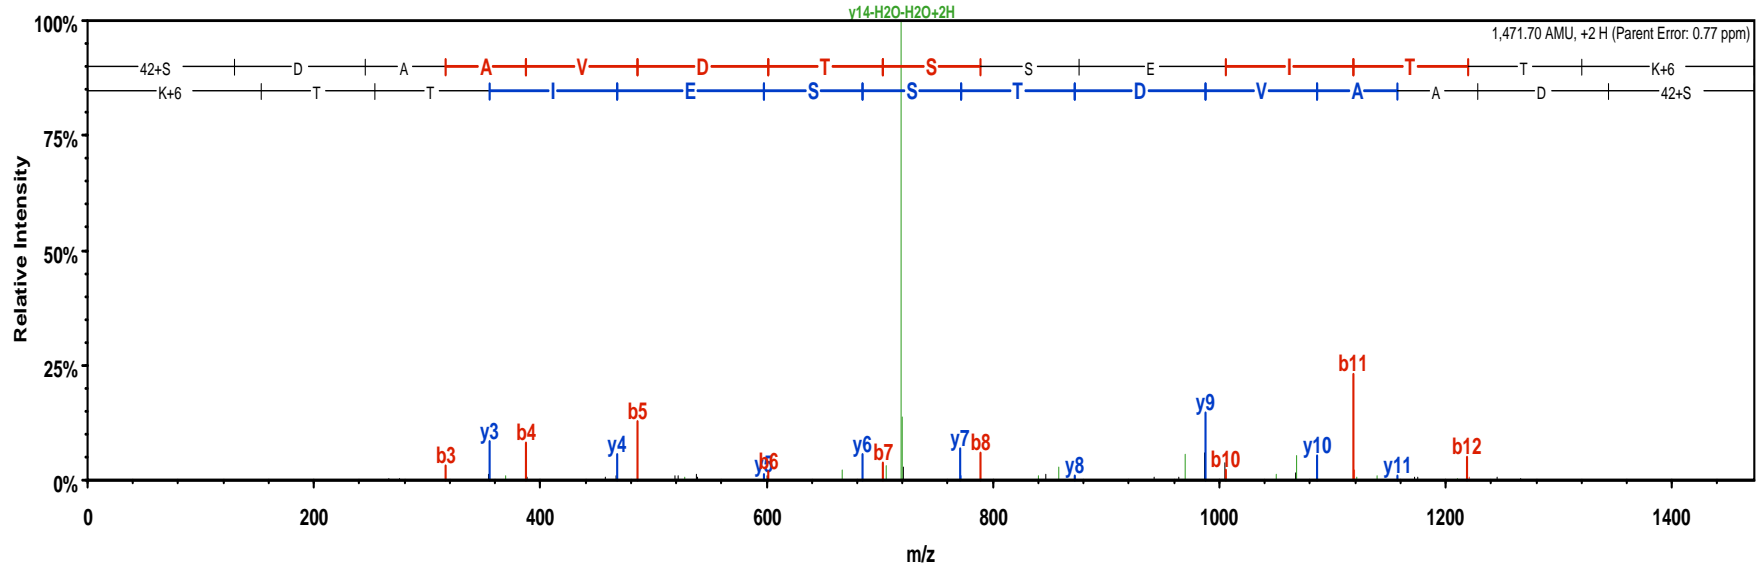

| ... | B Ions  | B+2H  | B-NH3   | B-H2O   | AA   | Y Ions  | Y+2H  | Y-NH3   | Y-H2O   | ... |
|-----|---------|-------|---------|---------|------|---------|-------|---------|---------|-----|
| 1   | 130.0   |       |         | 112.0   | S+42 | 1,472.7 | 736.9 | 1,455.7 | 1,454.7 | 14  |
| 2   | 245.1   |       |         | 227.1   | D    | 1,343.7 | 672.3 | 1,326.6 | 1,325.7 | 13  |
| 3   | 316.1   |       |         | 298.1   | A    | 1,228.6 | 614.8 | 1,211.6 | 1,210.6 | 12  |
| 4   | 387.2   |       |         | 369.1   | A    | 1,157.6 | 579.3 | 1,140.6 | 1,139.6 | 11  |
| 5   | 486.2   |       |         | 468.2   | V    | 1,086.6 | 543.8 | 1,069.5 | 1,068.6 | 10  |
| 6   | 601.2   | 301.1 |         | 583.2   | D    | 987.5   | 494.3 | 970.5   | 969.5   | 9   |
| 7   | 702.3   | 351.7 |         | 684.3   | T    | 872.5   | 436.7 | 855.4   | 854.5   | 8   |
| 8   | 789.3   | 395.2 |         | 771.3   | S    | 771.4   | 386.2 | 754.4   | 753.4   | 7   |
| 9   | 876.4   | 438.7 |         | 858.3   | S    | 684.4   | 342.7 | 667.4   | 666.4   | 6   |
| 10  | 1,005.4 | 503.2 |         | 987.4   | E    | 597.4   |       | 580.3   | 579.3   | 5   |
| 11  | 1,118.5 | 559.7 |         | 1,100.5 | I    | 468.3   |       | 451.3   | 450.3   | 4   |
| 12  | 1,219.5 | 610.3 |         | 1,201.5 | T    | 355.2   |       | 338.2   | 337.2   | 3   |
| 13  | 1,320.6 | 660.8 |         | 1,302.6 | T    | 254.2   |       | 237.2   | 236.2   | 2   |
| 14  | 1,472.7 | 736.9 | 1,455.7 | 1,454.7 | K+6  | 153.1   |       | 136.1   |         | 1   |

# Nuclear proteome

| Protein No. | Leading protein name  | Sequence                 | Mascot Score | Variable Modifications | SILAC State | Charge | m/z       |
|-------------|-----------------------|--------------------------|--------------|------------------------|-------------|--------|-----------|
| N-38        | sp Q9BUL8 PDC10_HUMAN | MAADDVEEYMIERPEPEFQDLNEK | 75.95        | Unmodified             | Light       | 3      | 966.76512 |

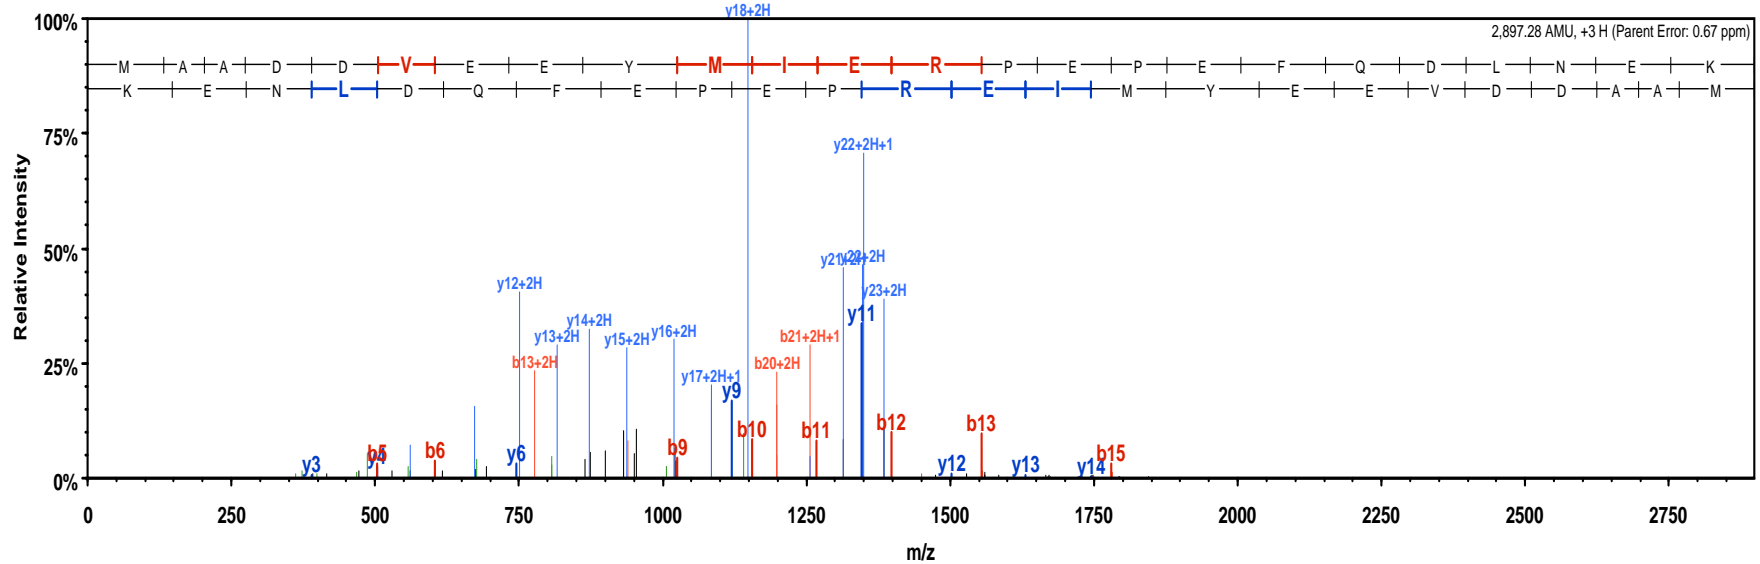

| ... | B Ions  | B+2H    | B-NH3   | B-H2O   | AA | Y Ions  | Y+2H    | Y-NH3   | Y-H2O   | ... |
|-----|---------|---------|---------|---------|----|---------|---------|---------|---------|-----|
| 1   | 132.0   |         |         |         | M  | 2,898.3 | 1,449.6 | 2,881.3 | 2,880.3 | 24  |
| 2   | 203.1   |         |         |         | A  | 2,767.2 | 1,384.1 | 2,750.2 | 2,749.2 | 23  |
| 3   | 274.1   |         |         |         | A  | 2,696.2 | 1,348.6 | 2,679.2 | 2,678.2 | 22  |
| 4   | 389.1   |         |         | 371.1   | D  | 2,625.2 | 1,313.1 | 2,608.1 | 2,607.2 | 21  |
| 5   | 504.2   |         |         | 486.2   | D  | 2,510.1 | 1,255.6 | 2,493.1 | 2,492.1 | 20  |
| 6   | 603.2   | 302.1   |         | 585.2   | V  | 2,395.1 | 1,198.1 | 2,378.1 | 2,377.1 | 19  |
| 7   | 732.3   | 366.6   |         | 714.3   | E  | 2,296.0 | 1,148.5 | 2,279.0 | 2,278.0 | 18  |
| 8   | 861.3   | 431.2   |         | 843.3   | E  | 2,167.0 | 1,084.0 | 2,150.0 | 2,149.0 | 17  |
| 9   | 1,024.4 | 512.7   |         | 1,006.4 | Y  | 2,038.0 | 1,019.5 | 2,020.9 | 2,019.9 | 16  |
| 10  | 1,155.4 | 578.2   |         | 1,137.4 | M  | 1,874.9 | 938.0   | 1,857.9 | 1,856.9 | 15  |
| 11  | 1,268.5 | 634.8   |         | 1,250.5 | I  | 1,743.9 | 872.4   | 1,726.8 | 1,725.8 | 14  |
| 12  | 1,397.6 | 699.3   |         | 1,379.5 | E  | 1,630.8 | 815.9   | 1,613.7 | 1,612.8 | 13  |
| 13  | 1,553.7 | 777.3   | 1,536.6 | 1,535.7 | R  | 1,501.7 | 751.4   | 1,484.7 | 1,483.7 | 12  |
| 14  | 1,650.7 | 825.9   | 1,633.7 | 1,632.7 | P  | 1,345.6 | 673.3   | 1,328.6 | 1,327.6 | 11  |
| 15  | 1,779.8 | 890.4   | 1,762.7 | 1,761.7 | E  | 1,248.6 | 624.8   | 1,231.5 | 1,230.6 | 10  |
| 16  | 1,876.8 | 938.9   | 1,859.8 | 1,858.8 | P  | 1,119.5 | 560.3   | 1,102.5 | 1,101.5 | 9   |
| 17  | 2,005.9 | 1,003.4 | 1,988.8 | 1,987.8 | E  | 1,022.5 | 511.7   | 1,005.5 | 1,004.5 | 8   |
| 18  | 2,152.9 | 1,077.0 | 2,135.9 | 2,134.9 | F  | 893.4   | 447.2   | 876.4   | 875.4   | 7   |
| 19  | 2,281.0 | 1,141.0 | 2,264.0 | 2,263.0 | Q  | 746.4   | 373.7   | 729.3   | 728.4   | 6   |
| 20  | 2,396.0 | 1,198.5 | 2,379.0 | 2,378.0 | D  | 618.3   |         | 601.3   | 600.3   | 5   |
| 21  | 2,509.1 | 1,255.0 | 2,492.1 | 2,491.1 | L  | 503.3   |         | 486.3   | 485.3   | 4   |
| 22  | 2,623.1 | 1,312.1 | 2,606.1 | 2,605.1 | N  | 390.2   |         | 373.2   | 372.2   | 3   |
| 23  | 2,752.2 | 1,376.6 | 2,735.1 | 2,734.2 | E  | 276.2   |         | 259.1   | 258.1   | 2   |
| 24  | 2,898.3 | 1,449.6 | 2,881.3 | 2,880.3 | K  | 147.1   |         | 130.1   |         | 1   |

# Nuclear proteome

| Protein No. | Leading protein name  | Sequence               | Mascot Score | Variable Modifications | SILAC State | Charge | m/z       |
|-------------|-----------------------|------------------------|--------------|------------------------|-------------|--------|-----------|
| N-39        | sp Q9BW72 HIG2A_HUMAN | IAAQGFTVVAAILLGLAVTAMK | 72.8         | Unmodified             | Light       | 3      | 687.07098 |

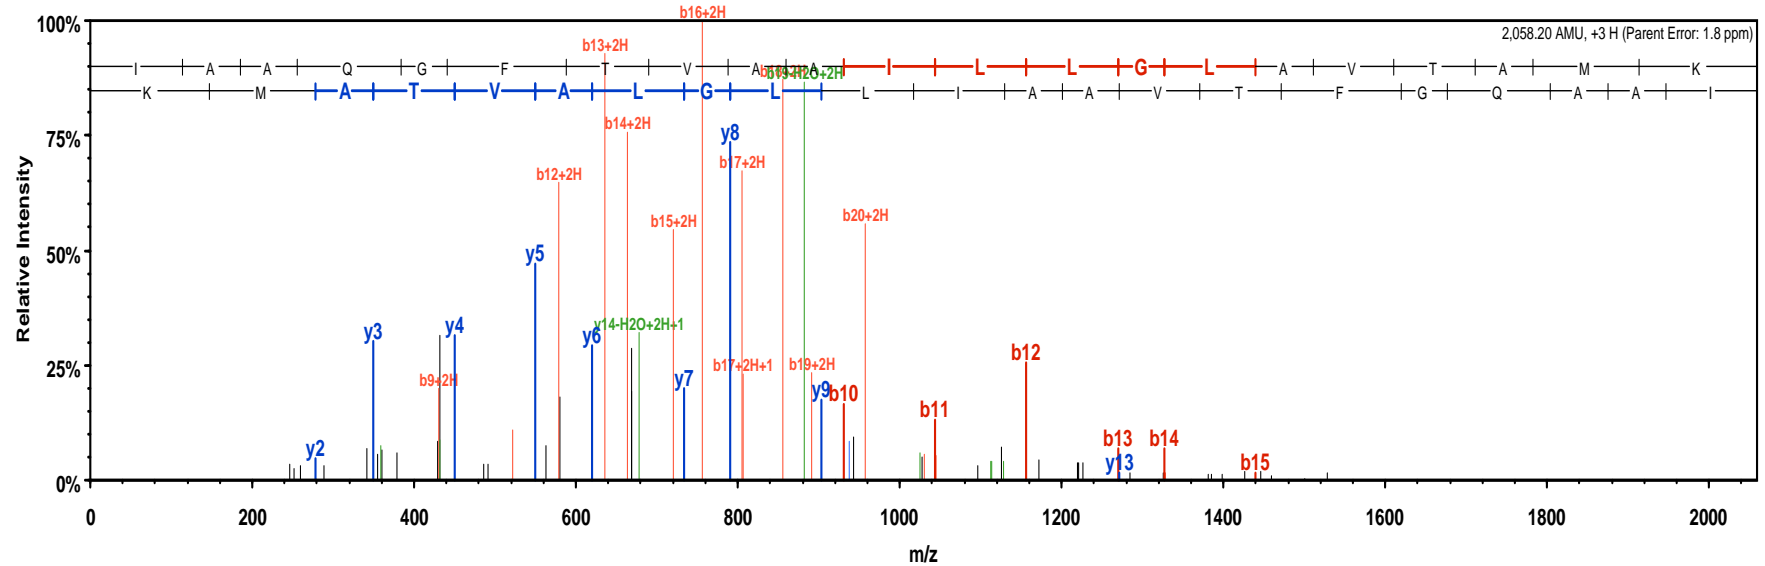

| ... | B Ions  | B+2H    | B-NH3   | B-H2O   | AA | Y Ions  | Y+2H    | Y-NH3   | Y-H2O   | ... |
|-----|---------|---------|---------|---------|----|---------|---------|---------|---------|-----|
| 1   | 114.1   |         |         |         | I  | 2,059.2 | 1,030.1 | 2,042.2 | 2,041.2 | 21  |
| 2   | 185.1   |         |         |         | A  | 1,946.1 | 973.6   | 1,929.1 | 1,928.1 | 20  |
| 3   | 256.2   |         |         |         | A  | 1,875.1 | 938.0   | 1,858.1 | 1,857.1 | 19  |
| 4   | 384.2   |         | 367.2   |         | Q  | 1,804.0 | 902.5   | 1,787.0 | 1,786.0 | 18  |
| 5   | 441.2   |         | 424.2   |         | G  | 1,676.0 | 838.5   | 1,659.0 | 1,658.0 | 17  |
| 6   | 588.3   | 294.7   | 571.3   |         | F  | 1,619.0 | 810.0   | 1,601.9 | 1,600.9 | 16  |
| 7   | 689.4   | 345.2   | 672.3   | 671.4   | T  | 1,471.9 | 736.4   | 1,454.9 | 1,453.9 | 15  |
| 8   | 788.4   | 394.7   | 771.4   | 770.4   | V  | 1,370.8 | 685.9   | 1,353.8 | 1,352.8 | 14  |
| 9   | 859.5   | 430.2   | 842.4   | 841.5   | A  | 1,271.8 | 636.4   | 1,254.7 | 1,253.8 | 13  |
| 10  | 930.5   | 465.8   | 913.5   | 912.5   | A  | 1,200.7 | 600.9   | 1,183.7 | 1,182.7 | 12  |
| 11  | 1,043.6 | 522.3   | 1,026.6 | 1,025.6 | I  | 1,129.7 | 565.4   | 1,112.7 | 1,111.7 | 11  |
| 12  | 1,156.7 | 578.8   | 1,139.6 | 1,138.7 | L  | 1,016.6 | 508.8   | 999.6   | 998.6   | 10  |
| 13  | 1,269.8 | 635.4   | 1,252.7 | 1,251.7 | L  | 903.5   | 452.3   | 886.5   | 885.5   | 9   |
| 14  | 1,326.8 | 663.9   | 1,309.8 | 1,308.8 | G  | 790.4   | 395.7   | 773.4   | 772.4   | 8   |
| 15  | 1,439.9 | 720.4   | 1,422.8 | 1,421.9 | L  | 733.4   | 367.2   | 716.4   | 715.4   | 7   |
| 16  | 1,510.9 | 756.0   | 1,493.9 | 1,492.9 | A  | 620.3   | 310.7   | 603.3   | 602.3   | 6   |
| 17  | 1,610.0 | 805.5   | 1,592.9 | 1,592.0 | V  | 549.3   |         | 532.3   | 531.3   | 5   |
| 18  | 1,711.0 | 856.0   | 1,694.0 | 1,693.0 | T  | 450.2   |         | 433.2   | 432.2   | 4   |
| 19  | 1,782.1 | 891.5   | 1,765.0 | 1,764.0 | A  | 349.2   |         | 332.2   |         | 3   |
| 20  | 1,913.1 | 957.1   | 1,896.1 | 1,895.1 | M  | 278.2   |         | 261.1   |         | 2   |
| 21  | 2,059.2 | 1,030.1 | 2,042.2 | 2,041.2 | K  | 147.1   |         | 130.1   |         | 1   |



# Nuclear proteome

| Protein No. | Leading protein name  | Sequence      | Mascot Score | Variable Modifications                 | SILAC State | Charge | m/z           |
|-------------|-----------------------|---------------|--------------|----------------------------------------|-------------|--------|---------------|
| N-40        | sp Q9BW60 ELOV1_HUMAN | MEAVVNLYQEVMK | 71.14        | Acetyl (Protein N-term), Oxidation (M) | Heavy       | 2      | 806.3<br>9148 |

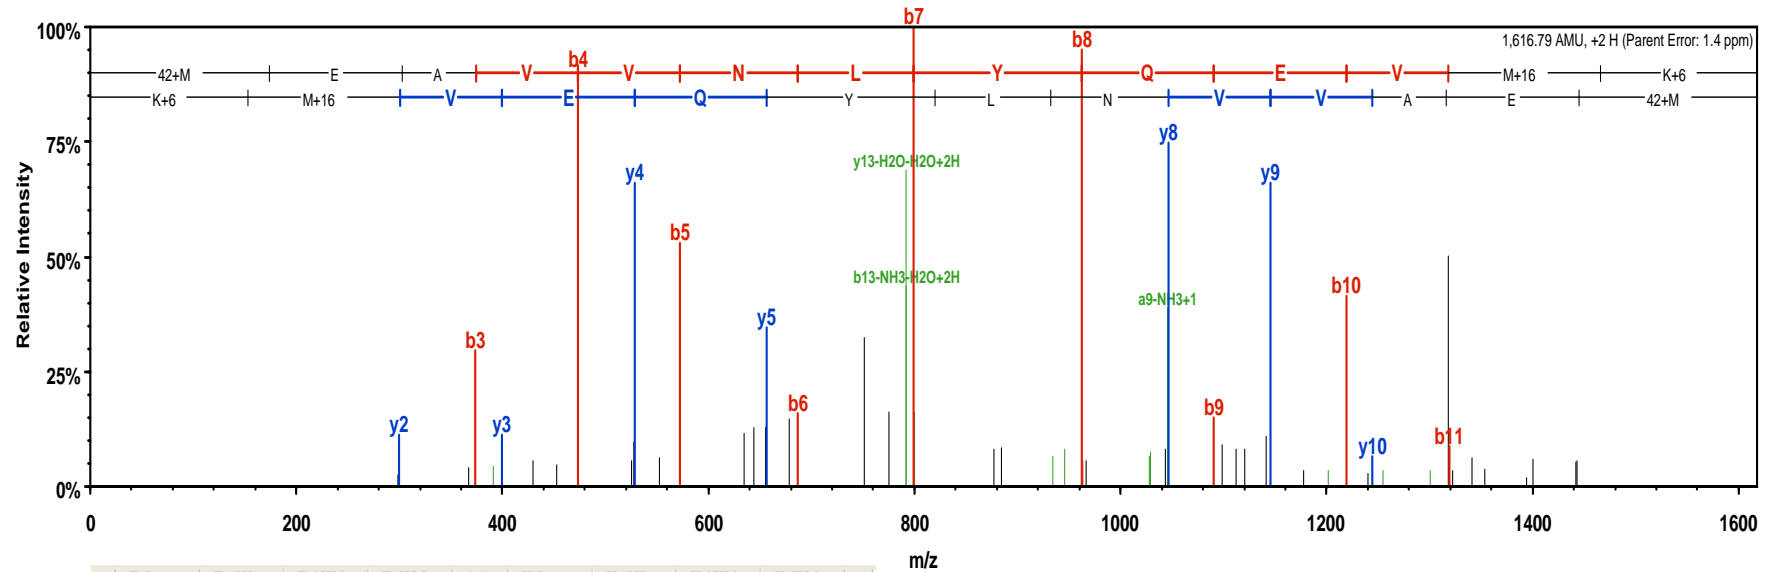

| ... | B Ions  | B+2H  | B-NH3   | B-H2O   | AA   | Y Ions  | Y+2H  | Y-NH3   | Y-H2O   | ... |
|-----|---------|-------|---------|---------|------|---------|-------|---------|---------|-----|
| 1   | 174.1   |       |         |         | M+42 | 1,617.8 | 809.4 | 1,600.8 | 1,599.8 | 13  |
| 2   | 303.1   |       |         | 285.1   | E    | 1,444.7 | 722.9 | 1,427.7 | 1,426.7 | 12  |
| 3   | 374.1   |       |         | 356.1   | A    | 1,315.7 | 658.4 | 1,298.7 | 1,297.7 | 11  |
| 4   | 473.2   |       |         | 455.2   | V    | 1,244.7 | 622.8 | 1,227.6 | 1,226.7 | 10  |
| 5   | 572.3   |       |         | 554.3   | V    | 1,145.6 | 573.3 | 1,128.6 | 1,127.6 | 9   |
| 6   | 686.3   | 343.7 | 669.3   | 668.3   | N    | 1,046.5 | 523.8 | 1,029.5 | 1,028.5 | 8   |
| 7   | 799.4   | 400.2 | 782.4   | 781.4   | L    | 932.5   | 466.7 | 915.5   | 914.5   | 7   |
| 8   | 962.5   | 481.7 | 945.4   | 944.5   | Y    | 819.4   | 410.2 | 802.4   | 801.4   | 6   |
| 9   | 1,090.5 | 545.8 | 1,073.5 | 1,072.5 | Q    | 656.3   |       | 639.3   | 638.3   | 5   |
| 10  | 1,219.6 | 610.3 | 1,202.5 | 1,201.6 | E    | 528.3   |       | 511.3   | 510.3   | 4   |
| 11  | 1,318.6 | 659.8 | 1,301.6 | 1,300.6 | V    | 399.2   |       | 382.2   |         | 3   |
| 12  | 1,465.7 | 733.3 | 1,448.6 | 1,447.7 | M+16 | 300.2   |       | 283.1   |         | 2   |
| 13  | 1,617.8 | 809.4 | 1,600.8 | 1,599.8 | K+6  | 153.1   |       | 136.1   |         | 1   |

# Nuclear proteome

| Protein No. | Leading protein name  | Sequence  | Mascot Score | Variable Modifications  | SILAC State | Charge | m/z       |
|-------------|-----------------------|-----------|--------------|-------------------------|-------------|--------|-----------|
| N-41        | sp Q96A72 IMGN2_HUMAN | AVASDFYLR | 71.04        | Acetyl (Protein N-term) |             | 2      | 542.27711 |

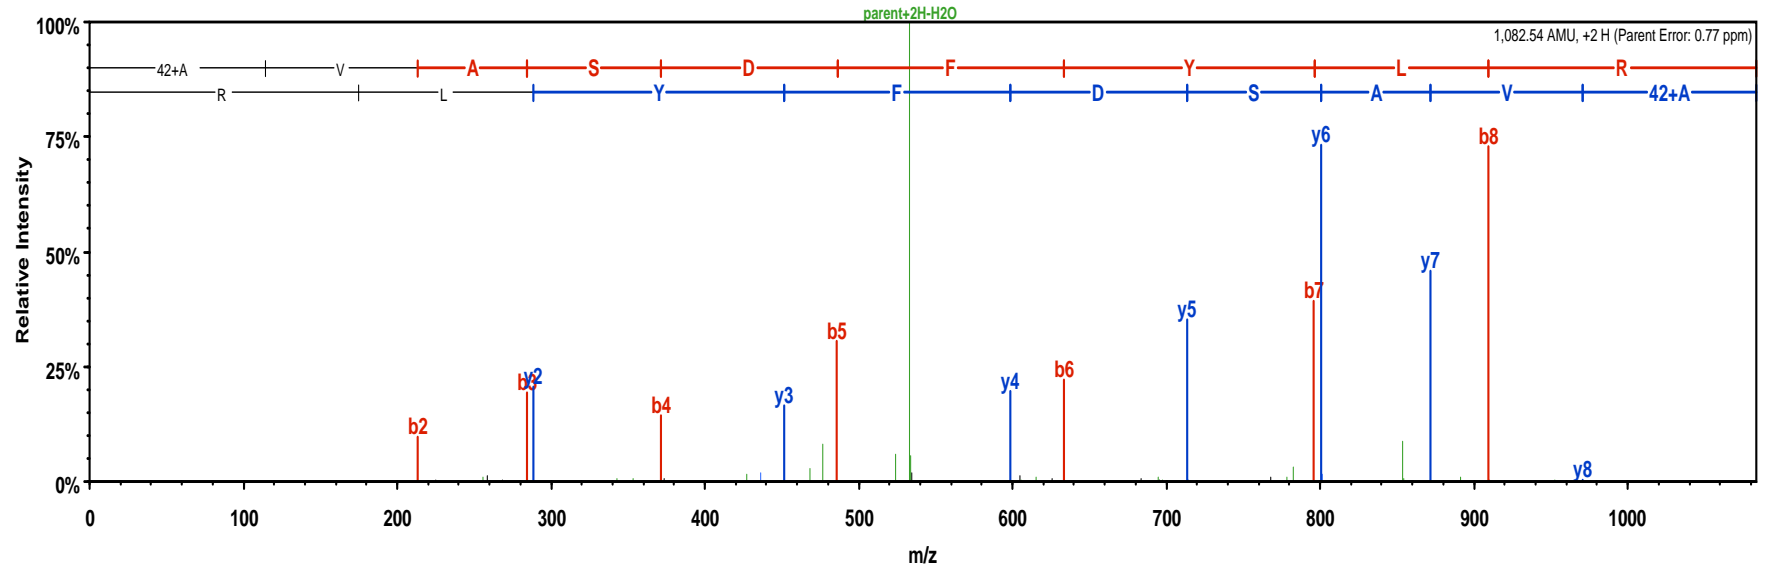

| ... | B Ions  | B+2H  | B-NH3   | B-H2O   | AA   | Y Ions  | Y+2H  | Y-NH3   | Y-H2O   | ... |
|-----|---------|-------|---------|---------|------|---------|-------|---------|---------|-----|
| 1   | 114.1   |       |         |         | A+42 | 1,083.5 | 542.3 | 1,066.5 | 1,065.5 | 9   |
| 2   | 213.1   |       |         |         | V    | 970.5   | 485.8 | 953.5   | 952.5   | 8   |
| 3   | 284.2   |       |         |         | A    | 871.4   | 436.2 | 854.4   | 853.4   | 7   |
| 4   | 371.2   |       |         | 353.2   | S    | 800.4   | 400.7 | 783.4   | 782.4   | 6   |
| 5   | 486.2   |       |         | 468.2   | D    | 713.4   |       | 696.3   | 695.4   | 5   |
| 6   | 633.3   | 317.1 |         | 615.3   | F    | 598.3   |       | 581.3   |         | 4   |
| 7   | 796.4   | 398.7 |         | 778.3   | V    | 451.3   |       | 434.2   |         | 3   |
| 8   | 909.4   | 455.2 |         | 891.4   | L    | 288.2   |       | 271.2   |         | 2   |
| 9   | 1,083.5 | 542.3 | 1,066.5 | 1,065.5 | R    | 175.1   |       | 158.1   |         | 1   |

# Nuclear proteome

| Protein No. | Leading protein name | Sequence         | Mascot Score | Variable Modifications | SILAC State | Charge | m/z       |
|-------------|----------------------|------------------|--------------|------------------------|-------------|--------|-----------|
| N-42        | sp Q7Z5J4 RAI1_HUMAN | TPGPPGLTTTPAPPDK | 70.89        | Unmodified             | Light       | 2      | 773.90921 |

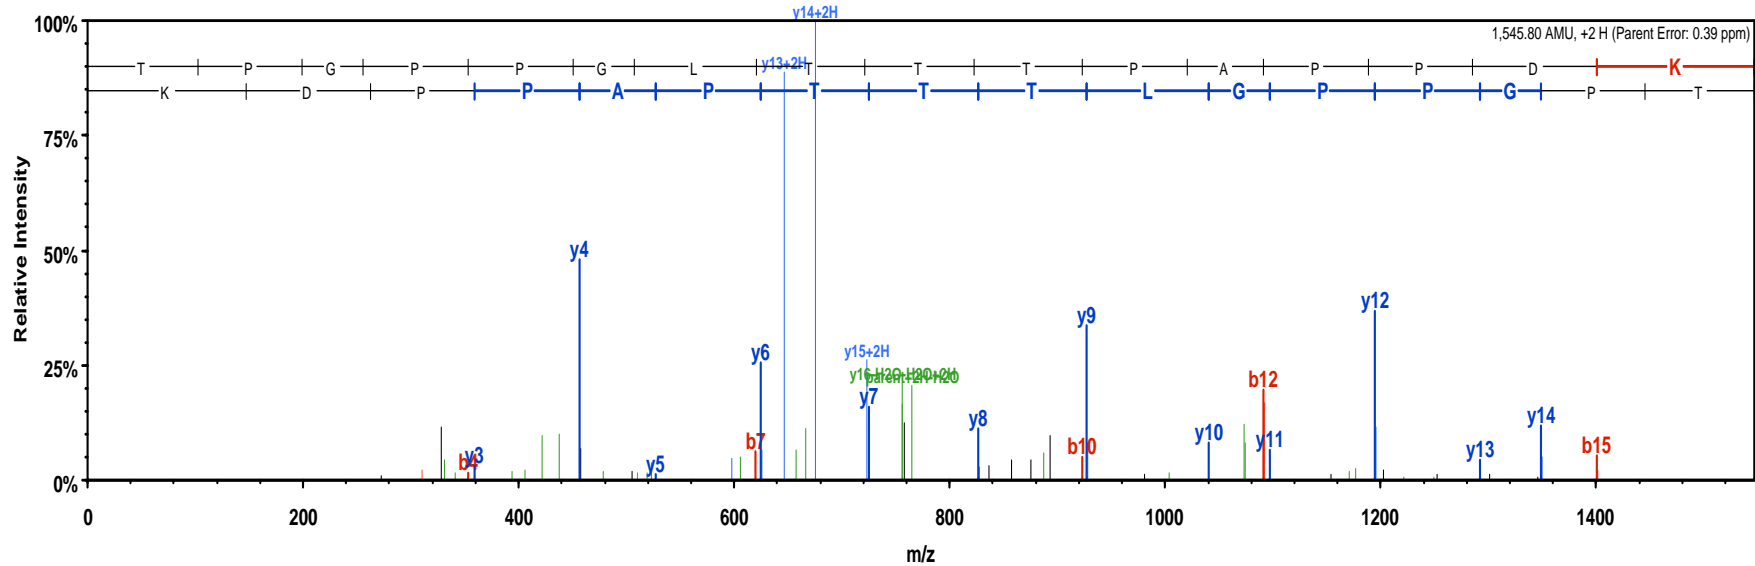

| ... | B Ions  | B+2H  | B-NH3   | B-H2O   | AA | Y Ions  | Y+2H  | Y-NH3   | Y-H2O   | ... |
|-----|---------|-------|---------|---------|----|---------|-------|---------|---------|-----|
| 1   | 102.1   |       |         | 84.0    | T  | 1,546.8 | 773.9 | 1,529.8 | 1,528.8 | 16  |
| 2   | 199.1   |       |         | 181.1   | P  | 1,445.8 | 723.4 | 1,428.7 | 1,427.8 | 15  |
| 3   | 256.1   |       |         | 238.1   | G  | 1,348.7 | 674.9 | 1,331.7 | 1,330.7 | 14  |
| 4   | 353.2   |       |         | 335.2   | P  | 1,291.7 | 646.3 | 1,274.7 | 1,273.7 | 13  |
| 5   | 450.2   |       |         | 432.2   | P  | 1,194.6 | 597.8 | 1,177.6 | 1,176.6 | 12  |
| 6   | 507.3   | 254.1 |         | 489.2   | G  | 1,097.6 | 549.3 | 1,080.6 | 1,079.6 | 11  |
| 7   | 620.3   | 310.7 |         | 602.3   | L  | 1,040.6 | 520.8 | 1,023.5 | 1,022.6 | 10  |
| 8   | 721.4   | 361.2 |         | 703.4   | T  | 927.5   | 464.2 | 910.5   | 909.5   | 9   |
| 9   | 822.4   | 411.7 |         | 804.4   | T  | 826.4   | 413.7 | 809.4   | 808.4   | 8   |
| 10  | 923.5   | 462.2 |         | 905.5   | T  | 725.4   | 363.2 | 708.4   | 707.4   | 7   |
| 11  | 1,020.5 | 510.8 |         | 1,002.5 | P  | 624.3   | 312.7 | 607.3   | 606.3   | 6   |
| 12  | 1,091.6 | 546.3 |         | 1,073.6 | A  | 527.3   |       | 510.3   | 509.3   | 5   |
| 13  | 1,188.6 | 594.8 |         | 1,170.6 | P  | 456.2   |       | 439.2   | 438.2   | 4   |
| 14  | 1,285.7 | 643.3 |         | 1,267.7 | P  | 359.2   |       | 342.2   | 341.2   | 3   |
| 15  | 1,400.7 | 700.9 |         | 1,382.7 | D  | 262.1   |       | 245.1   | 244.1   | 2   |
| 16  | 1,546.8 | 773.9 | 1,529.8 | 1,528.8 | K  | 147.1   |       | 130.1   |         | 1   |

# Nuclear proteome

| Protein No. | Leading protein name   | Sequence         | Mascot Score | Variable Modifications | SILAC State | Charge | m/z       |
|-------------|------------------------|------------------|--------------|------------------------|-------------|--------|-----------|
| N-43        | sp Q92597 INDRG1_HUMAN | EMQDVDLAEVKPLVEK | 69.48        | Unmodified             | Heavy       | 2      | 921.97951 |

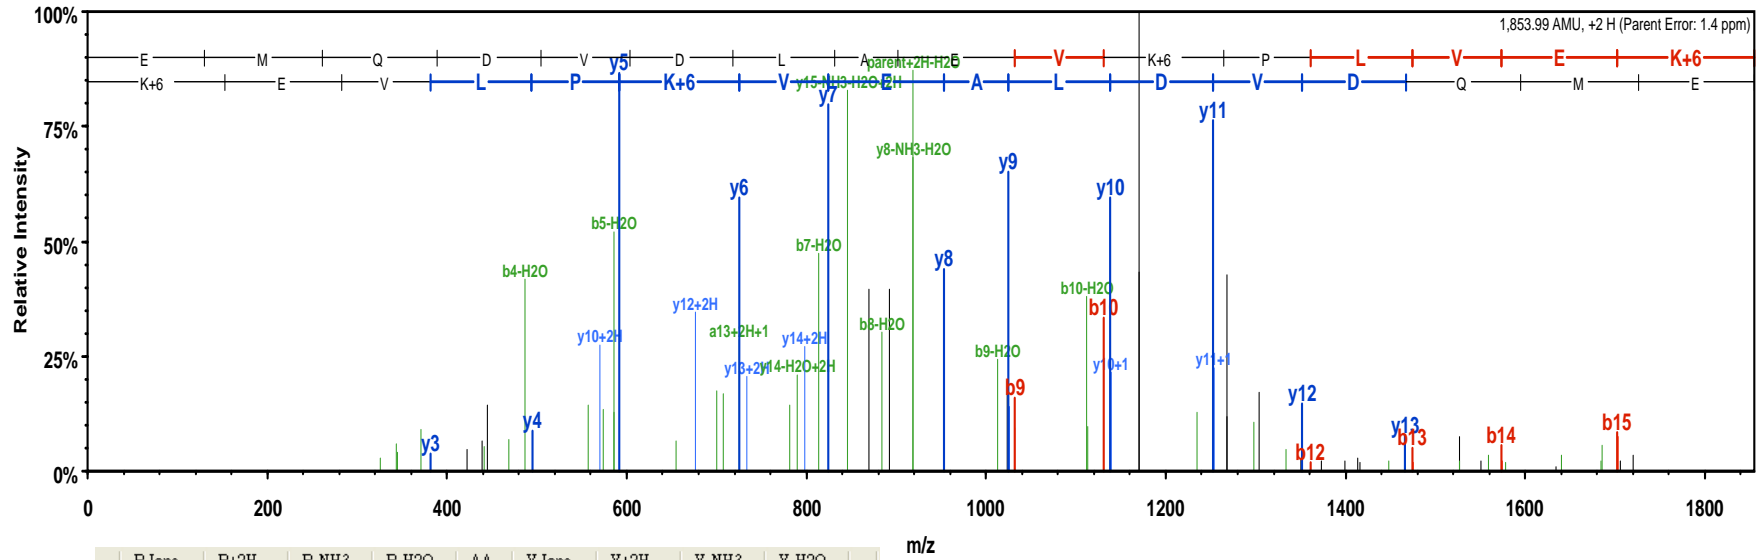

| ... | B Ions  | B+2H  | B-NH3   | B-H2O   | AA  | Y Ions  | Y+2H  | Y-NH3   | Y-H2O   | ... |
|-----|---------|-------|---------|---------|-----|---------|-------|---------|---------|-----|
| 1   | 130.0   |       |         | 112.0   | E   | 1,855.0 | 928.0 | 1,838.0 | 1,837.0 | 16  |
| 2   | 261.1   |       |         | 243.1   | M   | 1,725.9 | 863.5 | 1,708.9 | 1,707.9 | 15  |
| 3   | 389.1   |       | 372.1   | 371.1   | Q   | 1,594.9 | 798.0 | 1,577.9 | 1,576.9 | 14  |
| 4   | 504.2   |       | 487.1   | 486.2   | D   | 1,466.9 | 733.9 | 1,449.8 | 1,448.8 | 13  |
| 5   | 603.2   |       | 586.2   | 585.2   | V   | 1,351.8 | 676.4 | 1,334.8 | 1,333.8 | 12  |
| 6   | 718.3   | 359.6 | 701.2   | 700.3   | D   | 1,252.8 | 626.9 | 1,235.7 | 1,234.7 | 11  |
| 7   | 831.4   | 416.2 | 814.3   | 813.3   | L   | 1,137.7 | 569.4 | 1,120.7 | 1,119.7 | 10  |
| 8   | 902.4   | 451.7 | 885.4   | 884.4   | A   | 1,024.6 | 512.8 | 1,007.6 | 1,006.6 | 9   |
| 9   | 1,031.4 | 516.2 | 1,014.4 | 1,013.4 | E   | 953.6   | 477.3 | 936.6   | 935.6   | 8   |
| 10  | 1,130.5 | 565.8 | 1,113.5 | 1,112.5 | V   | 824.6   | 412.8 | 807.5   | 806.6   | 7   |
| 11  | 1,264.6 | 632.8 | 1,247.6 | 1,246.6 | K+6 | 725.5   | 363.3 | 708.5   | 707.5   | 6   |
| 12  | 1,361.7 | 681.3 | 1,344.6 | 1,343.7 | P   | 591.4   |       | 574.4   | 573.4   | 5   |
| 13  | 1,474.8 | 737.9 | 1,457.7 | 1,456.7 | L   | 494.3   |       | 477.3   | 476.3   | 4   |
| 14  | 1,573.8 | 787.4 | 1,556.8 | 1,555.8 | V   | 381.2   |       | 364.2   | 363.2   | 3   |
| 15  | 1,702.9 | 851.9 | 1,685.8 | 1,684.9 | E   | 282.2   |       | 265.1   | 264.2   | 2   |
| 16  | 1,855.0 | 928.0 | 1,838.0 | 1,837.0 | K+6 | 153.1   |       | 136.1   |         | 1   |

# Nuclear proteome

| Protein No. | Leading protein name | Sequence      | Mascot Score | Variable Modifications | SILAC State | Charge | m/z       |
|-------------|----------------------|---------------|--------------|------------------------|-------------|--------|-----------|
| N-44        | spIP61769IB2MG_HUMAN | IEKVEHSDLSFSK | 69.32        | Unmodified             | Light       | 2      | 759.89356 |

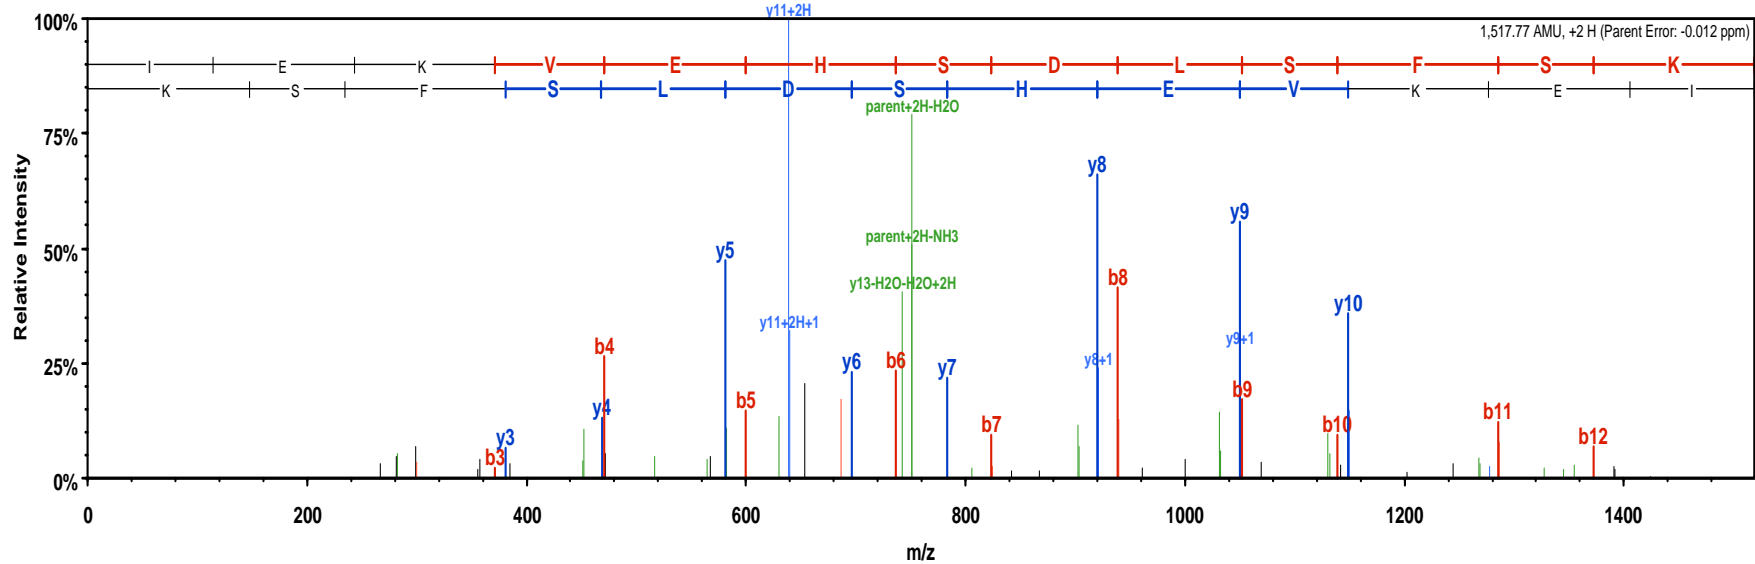

| ... | B Ions  | B+2H  | B-NH3   | B-H2O   | AA | Y Ions  | Y+2H  | Y-NH3   | Y-H2O   | ... |
|-----|---------|-------|---------|---------|----|---------|-------|---------|---------|-----|
| 1   | 114.1   |       |         |         | I  | 1,518.8 | 759.9 | 1,501.8 | 1,500.8 | 13  |
| 2   | 243.1   |       |         | 225.1   | E  | 1,405.7 | 703.4 | 1,388.7 | 1,387.7 | 12  |
| 3   | 371.2   | 186.1 | 354.2   | 353.2   | K  | 1,276.7 | 638.8 | 1,259.6 | 1,258.6 | 11  |
| 4   | 470.3   | 235.7 | 453.3   | 452.3   | Y  | 1,148.6 | 574.8 | 1,131.5 | 1,130.5 | 10  |
| 5   | 599.3   | 300.2 | 582.3   | 581.3   | E  | 1,049.5 | 525.2 | 1,032.5 | 1,031.5 | 9   |
| 6   | 736.4   | 368.7 | 719.4   | 718.4   | H  | 920.4   | 460.7 | 903.4   | 902.4   | 8   |
| 7   | 823.4   | 412.2 | 806.4   | 805.4   | S  | 783.4   | 392.2 | 766.4   | 765.4   | 7   |
| 8   | 938.5   | 469.7 | 921.4   | 920.4   | D  | 696.4   | 348.7 | 679.3   | 678.3   | 6   |
| 9   | 1,051.5 | 526.3 | 1,034.5 | 1,033.5 | L  | 581.3   |       | 564.3   | 563.3   | 5   |
| 10  | 1,138.6 | 569.8 | 1,121.5 | 1,120.6 | S  | 468.2   |       | 451.2   | 450.2   | 4   |
| 11  | 1,285.6 | 643.3 | 1,268.6 | 1,267.6 | F  | 381.2   |       | 364.2   | 363.2   | 3   |
| 12  | 1,372.7 | 686.8 | 1,355.6 | 1,354.7 | S  | 234.1   |       | 217.1   | 216.1   | 2   |
| 13  | 1,518.8 | 759.9 | 1,501.8 | 1,500.8 | K  | 147.1   |       | 130.1   |         | 1   |

# Nuclear proteome

| Protein No. | Leading protein name | Sequence         | Mascot Score | Variable Modifications | SILAC State | Charge | m/z       |
|-------------|----------------------|------------------|--------------|------------------------|-------------|--------|-----------|
| N-45        | sp Q96C86 DCPS_HUMAN | ELDVEEAHAASTEELK | 69.21        | Unmodified             | Heavy       | 2      | 829.38121 |

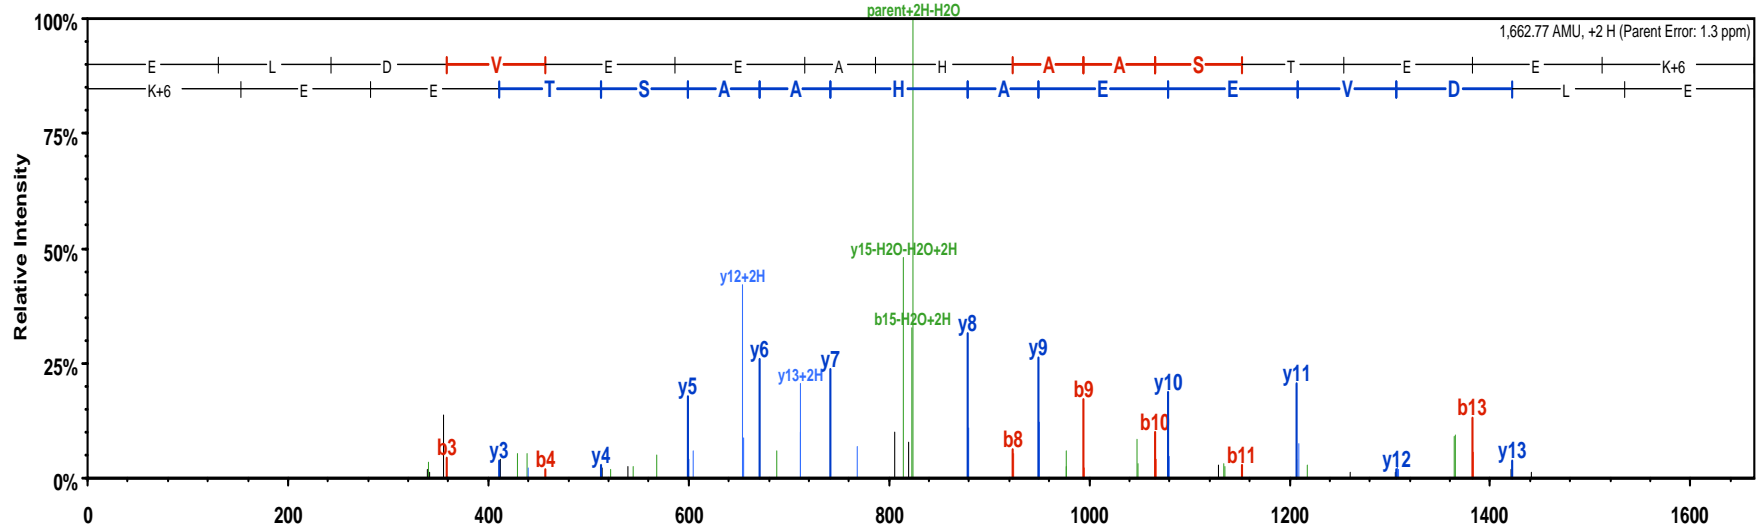

| ... | B Ions  | B+2H  | B-NH3   | B-H2O   | AA  | Y Ions  | Y+2H  | Y-NH3   | Y-H2O   | ... |
|-----|---------|-------|---------|---------|-----|---------|-------|---------|---------|-----|
| 1   | 130.0   |       |         | 112.0   | E   | 1,663.8 | 832.4 | 1,646.7 | 1,645.8 | 15  |
| 2   | 243.1   |       |         | 225.1   | L   | 1,534.7 | 767.9 | 1,517.7 | 1,516.7 | 14  |
| 3   | 358.2   |       |         | 340.2   | D   | 1,421.6 | 711.3 | 1,404.6 | 1,403.6 | 13  |
| 4   | 457.2   |       |         | 439.2   | V   | 1,306.6 | 653.8 | 1,289.6 | 1,288.6 | 12  |
| 5   | 586.3   |       |         | 568.3   | E   | 1,207.6 | 604.3 | 1,190.5 | 1,189.5 | 11  |
| 6   | 715.3   | 358.2 |         | 697.3   | E   | 1,078.5 | 539.8 | 1,061.5 | 1,060.5 | 10  |
| 7   | 786.4   | 393.7 |         | 768.3   | A   | 949.5   | 475.2 | 932.4   | 931.5   | 9   |
| 8   | 923.4   | 462.2 |         | 905.4   | H   | 878.4   | 439.7 | 861.4   | 860.4   | 8   |
| 9   | 994.4   | 497.7 |         | 976.4   | A   | 741.4   | 371.2 | 724.3   | 723.4   | 7   |
| 10  | 1,065.5 | 533.2 |         | 1,047.5 | A   | 670.3   | 335.7 | 653.3   | 652.3   | 6   |
| 11  | 1,152.5 | 576.8 |         | 1,134.5 | S   | 599.3   |       | 582.3   | 581.3   | 5   |
| 12  | 1,253.6 | 627.3 |         | 1,235.6 | T   | 512.3   |       | 495.2   | 494.3   | 4   |
| 13  | 1,382.6 | 691.8 |         | 1,364.6 | E   | 411.2   |       | 394.2   | 393.2   | 3   |
| 14  | 1,511.6 | 756.3 |         | 1,493.6 | E   | 282.2   |       | 265.1   | 264.2   | 2   |
| 15  | 1,663.8 | 832.4 | 1,646.7 | 1,645.8 | K+6 | 153.1   |       | 136.1   |         | 1   |

# Nuclear proteome

| Protein No. | Leading protein name | Sequence                    | Mascot Score | Variable Modifications | SILAC State | Charge | m/z       |
|-------------|----------------------|-----------------------------|--------------|------------------------|-------------|--------|-----------|
| N-46        | sp Q9NZJ4 SACS_HUMAN | IEEYSQQLEGLTNDVHTLEAYGVDSLK | 68.97        | Unmodified             | Light       | 3      | 1017.8313 |

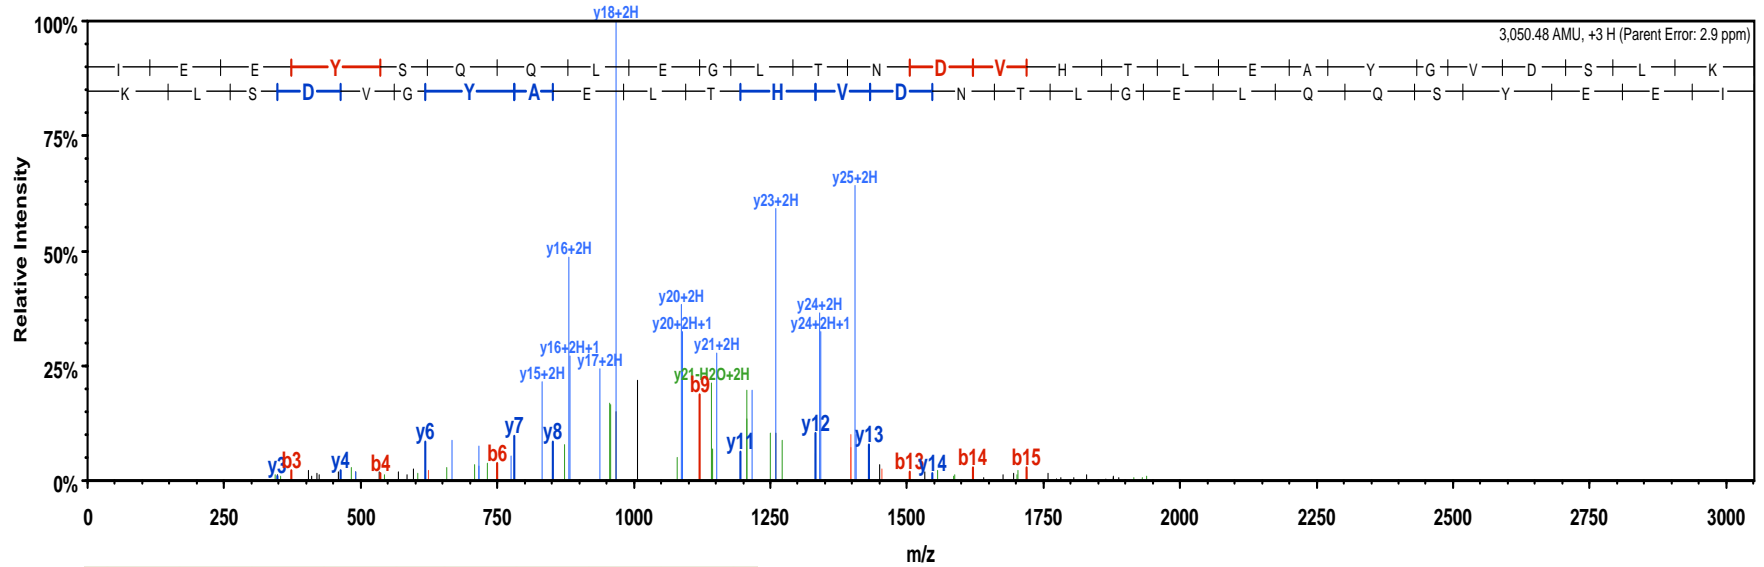

| ... | B Ions  | B+2H    | B-NH3   | B-H2O   | AA | Y Ions  | Y+2H    | Y-NH3   | Y-H2O   | ... |
|-----|---------|---------|---------|---------|----|---------|---------|---------|---------|-----|
| 1   | 114.1   |         |         |         | I  | 3,051.5 | 1,526.2 | 3,034.5 | 3,033.5 | 27  |
| 2   | 243.1   |         |         | 225.1   | E  | 2,938.4 | 1,469.7 | 2,921.4 | 2,920.4 | 26  |
| 3   | 372.2   |         |         | 354.2   | E  | 2,809.4 | 1,405.2 | 2,792.3 | 2,791.3 | 25  |
| 4   | 535.2   |         |         | 517.2   | Y  | 2,680.3 | 1,340.7 | 2,663.3 | 2,662.3 | 24  |
| 5   | 622.3   |         |         | 604.3   | S  | 2,517.2 | 1,259.1 | 2,500.2 | 2,499.2 | 23  |
| 6   | 750.3   | 375.7   | 733.3   | 732.3   | Q  | 2,430.2 | 1,215.6 | 2,413.2 | 2,412.2 | 22  |
| 7   | 878.4   | 439.7   | 861.4   | 860.4   | Q  | 2,302.2 | 1,151.6 | 2,285.1 | 2,284.1 | 21  |
| 8   | 991.5   | 496.2   | 974.4   | 973.5   | L  | 2,174.1 | 1,087.6 | 2,157.1 | 2,156.1 | 20  |
| 9   | 1,120.5 | 560.8   | 1,103.5 | 1,102.5 | E  | 2,061.0 | 1,031.0 | 2,044.0 | 2,043.0 | 19  |
| 10  | 1,177.5 | 589.3   | 1,160.5 | 1,159.5 | G  | 1,932.0 | 966.5   | 1,914.9 | 1,914.0 | 18  |
| 11  | 1,290.6 | 645.8   | 1,273.6 | 1,272.6 | L  | 1,874.9 | 938.0   | 1,857.9 | 1,856.9 | 17  |
| 12  | 1,391.7 | 696.3   | 1,374.6 | 1,373.7 | T  | 1,761.9 | 881.4   | 1,744.8 | 1,743.9 | 16  |
| 13  | 1,505.7 | 753.4   | 1,488.7 | 1,487.7 | N  | 1,660.8 | 830.9   | 1,643.8 | 1,642.8 | 15  |
| 14  | 1,620.7 | 810.9   | 1,603.7 | 1,602.7 | D  | 1,546.8 | 773.9   | 1,529.7 | 1,528.8 | 14  |
| 15  | 1,719.8 | 860.4   | 1,702.8 | 1,701.8 | Y  | 1,431.7 | 716.4   | 1,414.7 | 1,413.7 | 13  |
| 16  | 1,856.9 | 928.9   | 1,839.8 | 1,838.9 | H  | 1,332.7 | 666.8   | 1,315.7 | 1,314.7 | 12  |
| 17  | 1,957.9 | 979.5   | 1,940.9 | 1,939.9 | T  | 1,195.6 | 598.3   | 1,178.6 | 1,177.6 | 11  |
| 18  | 2,071.0 | 1,036.0 | 2,054.0 | 2,053.0 | L  | 1,094.6 | 547.8   | 1,077.5 | 1,076.6 | 10  |
| 19  | 2,200.0 | 1,100.5 | 2,183.0 | 2,182.0 | E  | 981.5   | 491.2   | 964.5   | 963.5   | 9   |
| 20  | 2,271.1 | 1,136.0 | 2,254.1 | 2,253.1 | A  | 852.4   | 426.7   | 835.4   | 834.4   | 8   |
| 21  | 2,434.1 | 1,217.6 | 2,417.1 | 2,416.1 | Y  | 781.4   | 391.2   | 764.4   | 763.4   | 7   |
| 22  | 2,491.2 | 1,246.1 | 2,474.1 | 2,473.2 | G  | 618.3   | 309.7   | 601.3   | 600.3   | 6   |
| 23  | 2,590.2 | 1,295.6 | 2,573.2 | 2,572.2 | V  | 561.3   |         | 544.3   | 543.3   | 5   |
| 24  | 2,705.3 | 1,353.1 | 2,688.2 | 2,687.2 | D  | 462.3   |         | 445.2   | 444.2   | 4   |
| 25  | 2,792.3 | 1,396.6 | 2,775.3 | 2,774.3 | S  | 347.2   |         | 330.2   | 329.2   | 3   |
| 26  | 2,905.4 | 1,453.2 | 2,888.3 | 2,887.4 | L  | 260.2   |         | 243.2   | 242.2   | 2   |
| 27  | 3,051.5 | 1,526.2 | 3,034.5 | 3,033.5 | K  | 147.1   |         | 130.1   |         | 1   |

# Nuclear proteome

| Protein No. | Leading protein name   | Sequence                | Mascot Score | Variable Modifications | SILAC State | Charge | m/z       |
|-------------|------------------------|-------------------------|--------------|------------------------|-------------|--------|-----------|
| N-47        | sp Q9H0V9 ILMA2L_HUMAN | GYFYGTSSITGDLSDNHDVISLK | 67.58        | Unmodified             | Light       | 3      | 830.39921 |

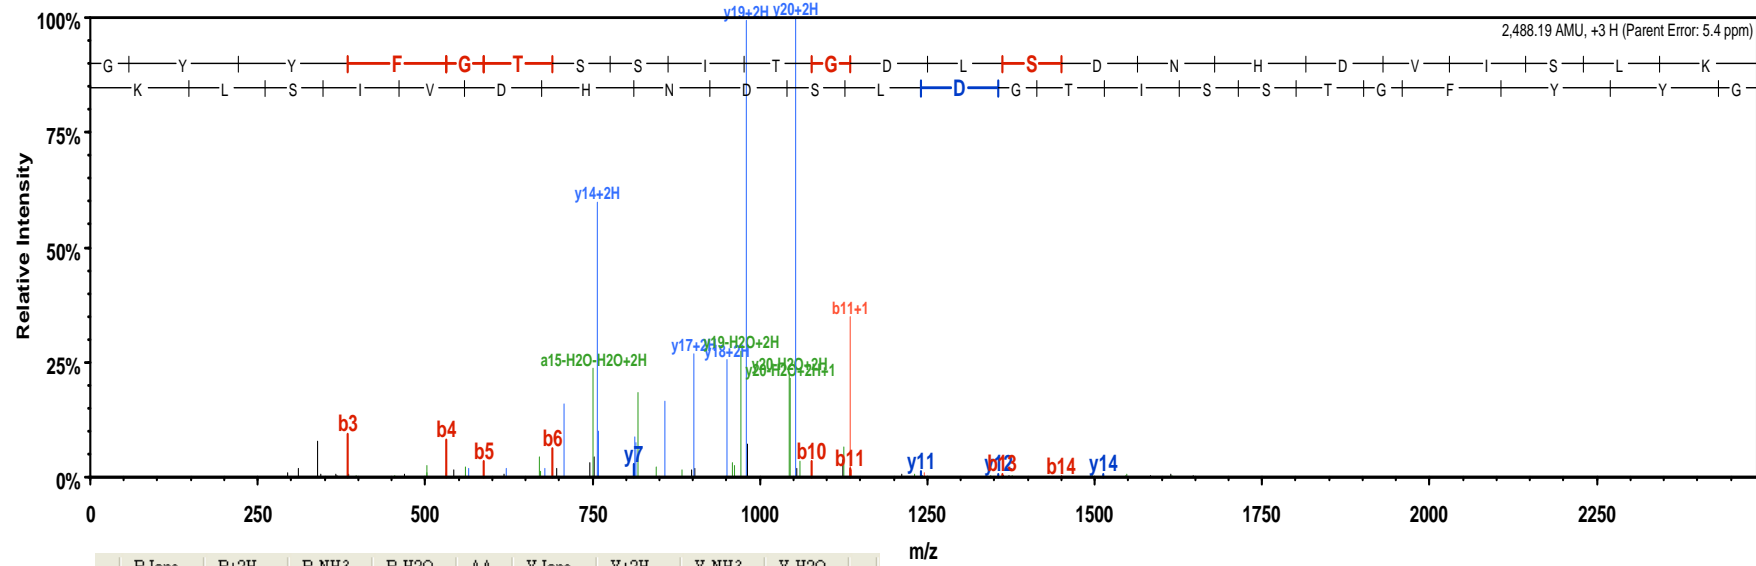

| ... | B Ions  | B+2H    | B-NH3   | B-H2O   | AA | Y Ions  | Y+2H    | Y-NH3   | Y-H2O   | ... |
|-----|---------|---------|---------|---------|----|---------|---------|---------|---------|-----|
| 1   | 58.0    |         |         |         | G  | 2,489.2 | 1,245.1 | 2,472.2 | 2,471.2 | 23  |
| 2   | 221.1   |         |         |         | Y  | 2,432.2 | 1,216.6 | 2,415.1 | 2,414.2 | 22  |
| 3   | 384.2   |         |         |         | Y  | 2,269.1 | 1,135.1 | 2,252.1 | 2,251.1 | 21  |
| 4   | 531.2   |         |         |         | F  | 2,106.0 | 1,053.5 | 2,089.0 | 2,088.0 | 20  |
| 5   | 588.2   |         |         |         | G  | 1,959.0 | 980.0   | 1,941.9 | 1,941.0 | 19  |
| 6   | 689.3   | 345.2   |         | 671.3   | T  | 1,901.9 | 951.5   | 1,884.9 | 1,883.9 | 18  |
| 7   | 776.3   | 388.7   |         | 758.3   | S  | 1,800.9 | 901.0   | 1,783.9 | 1,782.9 | 17  |
| 8   | 863.4   | 432.2   |         | 845.3   | S  | 1,713.9 | 857.4   | 1,696.8 | 1,695.9 | 16  |
| 9   | 976.4   | 488.7   |         | 958.4   | I  | 1,626.8 | 813.9   | 1,609.8 | 1,608.8 | 15  |
| 10  | 1,077.5 | 539.2   |         | 1,059.5 | T  | 1,513.7 | 757.4   | 1,496.7 | 1,495.7 | 14  |
| 11  | 1,134.5 | 567.8   |         | 1,116.5 | G  | 1,412.7 | 706.9   | 1,395.7 | 1,394.7 | 13  |
| 12  | 1,249.5 | 625.3   |         | 1,231.5 | D  | 1,355.7 | 678.3   | 1,338.7 | 1,337.7 | 12  |
| 13  | 1,362.6 | 681.8   |         | 1,344.6 | L  | 1,240.7 | 620.8   | 1,223.6 | 1,222.6 | 11  |
| 14  | 1,449.7 | 725.3   |         | 1,431.6 | S  | 1,127.6 | 564.3   | 1,110.5 | 1,109.6 | 10  |
| 15  | 1,564.7 | 782.8   |         | 1,546.7 | D  | 1,040.5 | 520.8   | 1,023.5 | 1,022.5 | 9   |
| 16  | 1,678.7 | 839.9   | 1,661.7 | 1,660.7 | N  | 925.5   | 463.3   | 908.5   | 907.5   | 8   |
| 17  | 1,815.8 | 908.4   | 1,798.8 | 1,797.8 | H  | 811.5   | 406.2   | 794.4   | 793.5   | 7   |
| 18  | 1,930.8 | 965.9   | 1,913.8 | 1,912.8 | D  | 674.4   | 337.7   | 657.4   | 656.4   | 6   |
| 19  | 2,029.9 | 1,015.4 | 2,012.9 | 2,011.9 | Y  | 559.4   |         | 542.4   | 541.4   | 5   |
| 20  | 2,143.0 | 1,072.0 | 2,125.9 | 2,125.0 | I  | 460.3   |         | 443.3   | 442.3   | 4   |
| 21  | 2,230.0 | 1,115.5 | 2,213.0 | 2,212.0 | S  | 347.2   |         | 330.2   | 329.2   | 3   |
| 22  | 2,343.1 | 1,172.0 | 2,326.1 | 2,325.1 | L  | 260.2   |         | 243.2   |         | 2   |
| 23  | 2,489.2 | 1,245.1 | 2,472.2 | 2,471.2 | K  | 147.1   |         | 130.1   |         | 1   |



# Nuclear proteome

| Protein No. | Leading protein name  | Sequence    | Mascot Score | Variable Modifications | SILAC State | Charge | m/z      |
|-------------|-----------------------|-------------|--------------|------------------------|-------------|--------|----------|
| N-48        | sp P82673 IRT35_HUMAN | NILETL LQMK | 66.82        | Unmodified             | Light       | 2      | 601.8443 |

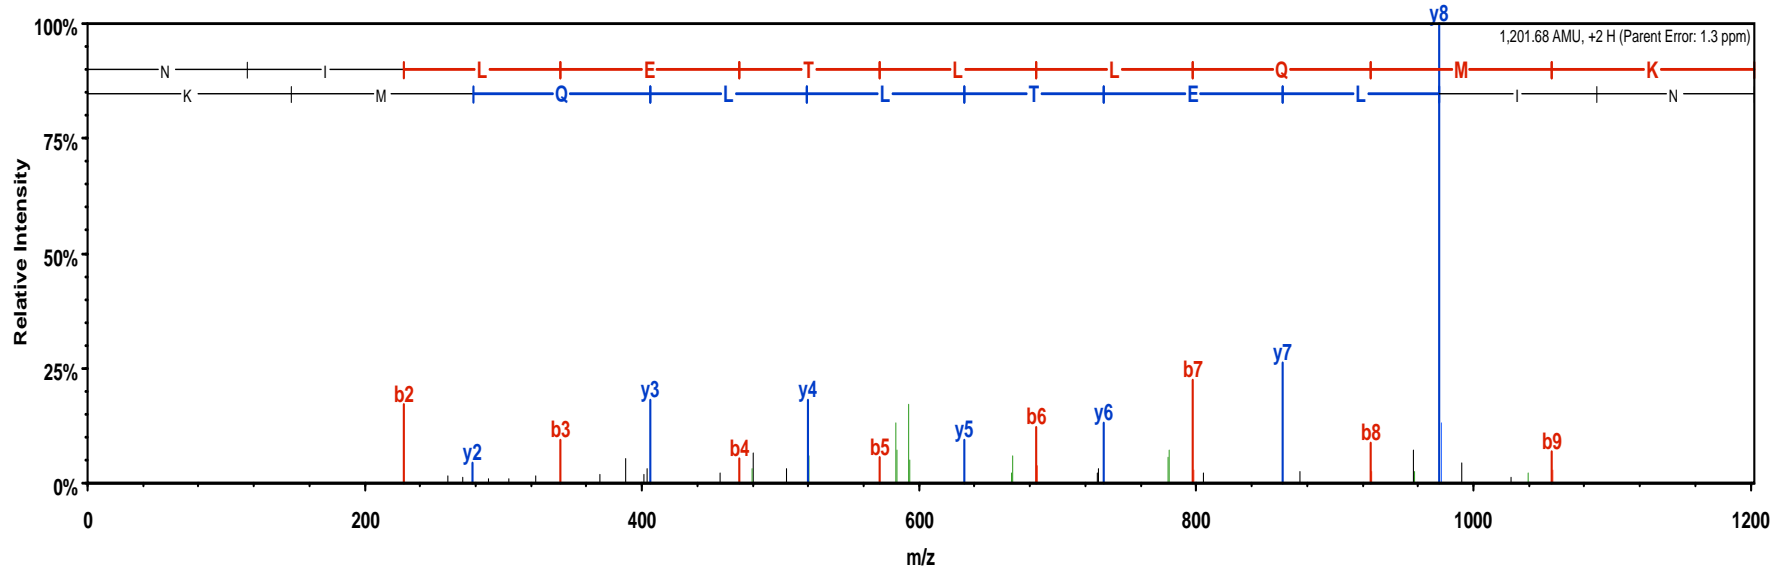

| ... | B Ions  | B+2H  | B-NH3   | B-H2O   | AA | Y Ions  | Y+2H  | Y-NH3   | Y-H2O   | ... |
|-----|---------|-------|---------|---------|----|---------|-------|---------|---------|-----|
| 1   | 115.1   |       | 98.0    |         | N  | 1,202.7 | 601.8 | 1,185.7 | 1,184.7 | 10  |
| 2   | 228.1   |       | 211.1   |         | I  | 1,088.6 | 544.8 | 1,071.6 | 1,070.6 | 9   |
| 3   | 341.2   |       | 324.2   |         | L  | 975.6   | 488.3 | 958.5   | 957.5   | 8   |
| 4   | 470.3   |       | 453.2   | 452.3   | E  | 862.5   | 431.7 | 845.4   | 844.5   | 7   |
| 5   | 571.3   |       | 554.3   | 553.3   | T  | 733.4   | 367.2 | 716.4   | 715.4   | 6   |
| 6   | 684.4   | 342.7 | 667.4   | 666.4   | L  | 632.4   |       | 615.4   |         | 5   |
| 7   | 797.5   | 399.2 | 780.5   | 779.5   | L  | 519.3   |       | 502.3   |         | 4   |
| 8   | 925.5   | 463.3 | 908.5   | 907.5   | Q  | 406.2   |       | 389.2   |         | 3   |
| 9   | 1,056.6 | 528.8 | 1,039.5 | 1,038.6 | M  | 278.2   |       | 261.1   |         | 2   |
| 10  | 1,202.7 | 601.8 | 1,185.7 | 1,184.7 | K  | 147.1   |       | 130.1   |         | 1   |

# Nuclear proteome

| Protein No. | Leading protein name | Sequence                   | Mascot Score | Variable Modifications | SILAC State | Charge | m/z       |
|-------------|----------------------|----------------------------|--------------|------------------------|-------------|--------|-----------|
| N-49        | sp P18846 ATF1_HUMAN | TTPSATSLPQTVVMTSPVTLTSQTTK | 65.43        | Unmodified             | Heavy       | 2      | 1339.2019 |

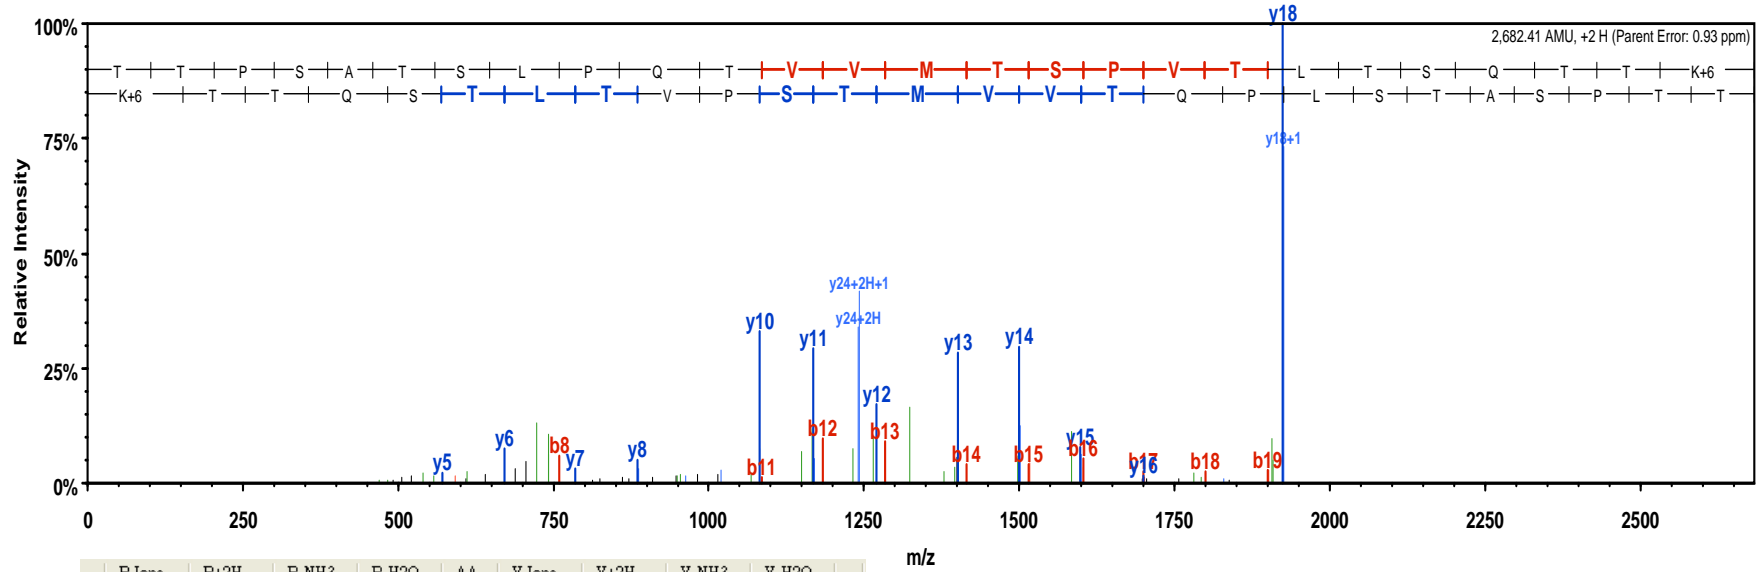

| ... | B Ions  | B+2H    | B-NH3   | B-H2O   | AA  | Y Ions  | Y+2H    | Y-NH3   | Y-H2O   | ... |
|-----|---------|---------|---------|---------|-----|---------|---------|---------|---------|-----|
| 1   | 102.1   |         |         | 84.0    | T   | 2,683.4 | 1,342.2 | 2,666.4 | 2,665.4 | 26  |
| 2   | 203.1   |         |         | 185.1   | T   | 2,582.4 | 1,291.7 | 2,565.3 | 2,564.4 | 25  |
| 3   | 300.2   |         |         | 282.1   | P   | 2,481.3 | 1,241.2 | 2,464.3 | 2,463.3 | 24  |
| 4   | 387.2   |         |         | 369.2   | S   | 2,384.3 | 1,192.6 | 2,367.2 | 2,366.3 | 23  |
| 5   | 458.2   |         |         | 440.2   | A   | 2,297.2 | 1,149.1 | 2,280.2 | 2,279.2 | 22  |
| 6   | 559.3   | 280.1   |         | 541.3   | T   | 2,226.2 | 1,113.6 | 2,209.2 | 2,208.2 | 21  |
| 7   | 646.3   | 323.7   |         | 628.3   | S   | 2,125.2 | 1,063.1 | 2,108.1 | 2,107.1 | 20  |
| 8   | 759.4   | 380.2   |         | 741.4   | L   | 2,038.1 | 1,019.6 | 2,021.1 | 2,020.1 | 19  |
| 9   | 856.4   | 428.7   |         | 838.4   | P   | 1,925.0 | 963.0   | 1,908.0 | 1,907.0 | 18  |
| 10  | 984.5   | 492.8   | 967.5   | 966.5   | Q   | 1,828.0 | 914.5   | 1,811.0 | 1,810.0 | 17  |
| 11  | 1,085.5 | 543.3   | 1,068.5 | 1,067.5 | T   | 1,699.9 | 850.5   | 1,682.9 | 1,681.9 | 16  |
| 12  | 1,184.6 | 592.8   | 1,167.6 | 1,166.6 | V   | 1,598.9 | 799.9   | 1,581.9 | 1,580.9 | 15  |
| 13  | 1,283.7 | 642.3   | 1,266.7 | 1,265.7 | V   | 1,499.8 | 750.4   | 1,482.8 | 1,481.8 | 14  |
| 14  | 1,414.7 | 707.9   | 1,397.7 | 1,396.7 | M   | 1,400.7 | 700.9   | 1,383.7 | 1,382.7 | 13  |
| 15  | 1,515.8 | 758.4   | 1,498.7 | 1,497.8 | T   | 1,269.7 | 635.4   | 1,252.7 | 1,251.7 | 12  |
| 16  | 1,602.8 | 801.9   | 1,585.8 | 1,584.8 | S   | 1,168.7 | 584.8   | 1,151.6 | 1,150.6 | 11  |
| 17  | 1,699.9 | 850.4   | 1,682.8 | 1,681.8 | P   | 1,081.6 | 541.3   | 1,064.6 | 1,063.6 | 10  |
| 18  | 1,798.9 | 900.5   | 1,781.9 | 1,780.9 | V   | 984.6   | 492.8   | 967.5   | 966.6   | 9   |
| 19  | 1,900.0 | 950.5   | 1,882.9 | 1,882.0 | T   | 885.5   | 443.3   | 868.5   | 867.5   | 8   |
| 20  | 2,013.1 | 1,007.0 | 1,996.0 | 1,995.0 | L   | 784.5   | 392.7   | 767.4   | 766.4   | 7   |
| 21  | 2,114.1 | 1,057.6 | 2,097.1 | 2,096.1 | T   | 671.4   | 336.2   | 654.3   | 653.4   | 6   |
| 22  | 2,201.1 | 1,101.1 | 2,184.1 | 2,183.1 | S   | 570.3   |         | 553.3   | 552.3   | 5   |
| 23  | 2,329.2 | 1,165.1 | 2,312.2 | 2,311.2 | Q   | 483.3   |         | 466.3   | 465.3   | 4   |
| 24  | 2,430.2 | 1,215.6 | 2,413.2 | 2,412.2 | T   | 355.2   |         | 338.2   | 337.2   | 3   |
| 25  | 2,531.3 | 1,266.1 | 2,514.3 | 2,513.3 | T   | 254.2   |         | 237.2   | 236.2   | 2   |
| 26  | 2,683.4 | 1,342.2 | 2,666.4 | 2,665.4 | K+6 | 153.1   |         | 136.1   |         | 1   |

# Nuclear proteome

| Protein No. | Leading protein name  | Sequence       | Mascot Score | Variable Modifications   | SILAC State | Charge | m/z      |
|-------------|-----------------------|----------------|--------------|--------------------------|-------------|--------|----------|
| N-50        | sp Q15853 IUSF2_HUMAN | QQIEELKNENALLR | 40.5         | Gln->pyro-Glu (N-term Q) | Heavy       | 2      | 840.9494 |

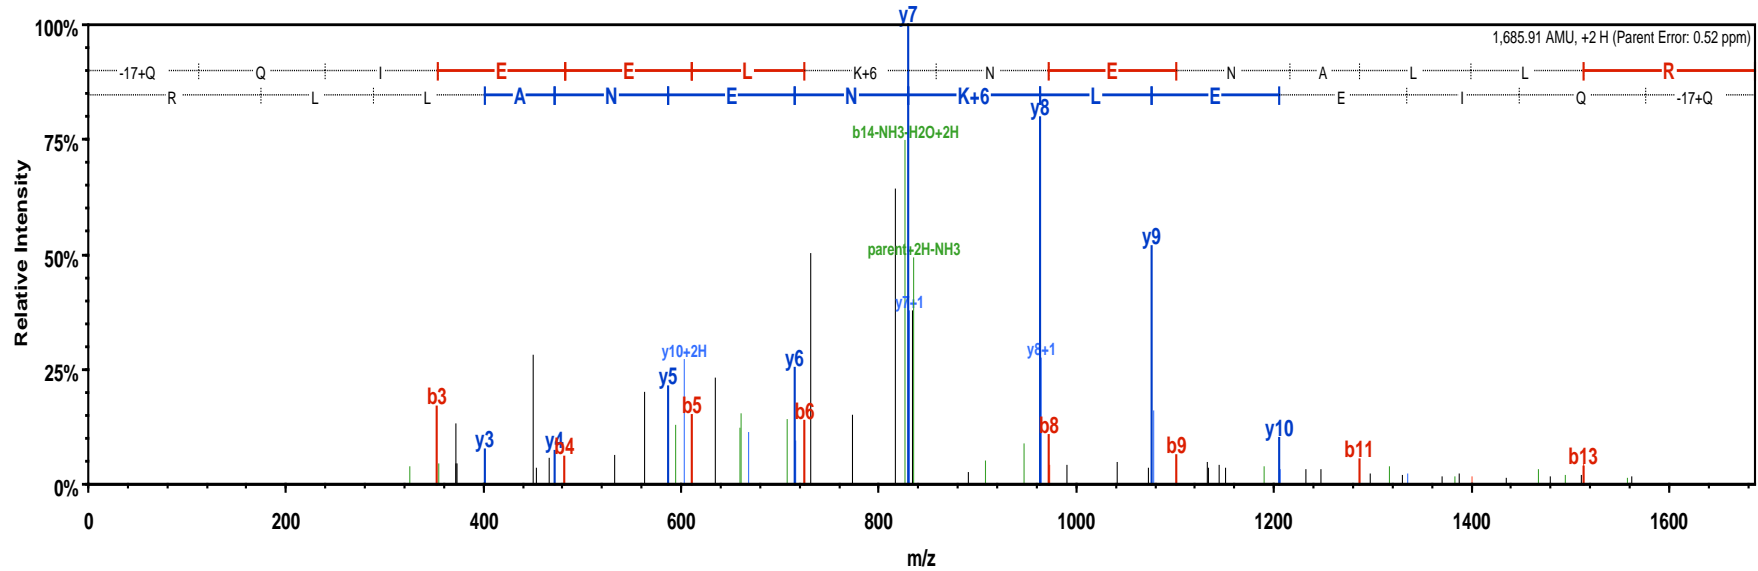

| ... | B Ions  | B+2H  | B-NH3   | B-H2O   | AA   | Y Ions  | Y+2H  | Y-NH3   | Y-H2O   | ... |
|-----|---------|-------|---------|---------|------|---------|-------|---------|---------|-----|
| 1   | 112.0   |       | 95.0    |         | Q-17 | 1,686.9 | 844.0 | 1,669.9 | 1,668.9 | 14  |
| 2   | 240.1   |       | 223.1   |         | Q    | 1,575.9 | 788.4 | 1,558.9 | 1,557.9 | 13  |
| 3   | 353.2   |       | 336.2   |         | I    | 1,447.8 | 724.4 | 1,430.8 | 1,429.8 | 12  |
| 4   | 482.2   |       | 465.2   | 464.2   | E    | 1,334.7 | 667.9 | 1,317.7 | 1,316.7 | 11  |
| 5   | 611.3   |       | 594.2   | 593.3   | E    | 1,205.7 | 603.4 | 1,188.7 | 1,187.7 | 10  |
| 6   | 724.4   | 362.7 | 707.3   | 706.3   | L    | 1,076.7 | 538.8 | 1,059.6 | 1,058.6 | 9   |
| 7   | 858.5   | 429.7 | 841.4   | 840.5   | K+6  | 963.6   | 482.3 | 946.5   | 945.6   | 8   |
| 8   | 972.5   | 486.8 | 955.5   | 954.5   | N    | 829.5   | 415.2 | 812.4   | 811.4   | 7   |
| 9   | 1,101.6 | 551.3 | 1,084.5 | 1,083.5 | E    | 715.4   | 358.2 | 698.4   | 697.4   | 6   |
| 10  | 1,215.6 | 608.3 | 1,198.6 | 1,197.6 | N    | 586.4   |       | 569.3   |         | 5   |
| 11  | 1,286.6 | 643.8 | 1,269.6 | 1,268.6 | A    | 472.3   |       | 455.3   |         | 4   |
| 12  | 1,399.7 | 700.4 | 1,382.7 | 1,381.7 | L    | 401.3   |       | 384.3   |         | 3   |
| 13  | 1,512.8 | 756.9 | 1,495.8 | 1,494.8 | L    | 288.2   |       | 271.2   |         | 2   |
| 14  | 1,686.9 | 844.0 | 1,669.9 | 1,668.9 | R    | 175.1   |       | 158.1   |         | 1   |

# Nuclear proteome

| Protein No. | Leading protein name   | Sequence          | Mascot Score | Variable Modifications | SILAC State | Charge | m/z       |
|-------------|------------------------|-------------------|--------------|------------------------|-------------|--------|-----------|
| N-51        | sp Q9NRL3 ISTRN4_HUMAN | APPGPAGLSGGESLLVK | 65.02        | Unmodified             | Heavy       | 2      | 775.43286 |

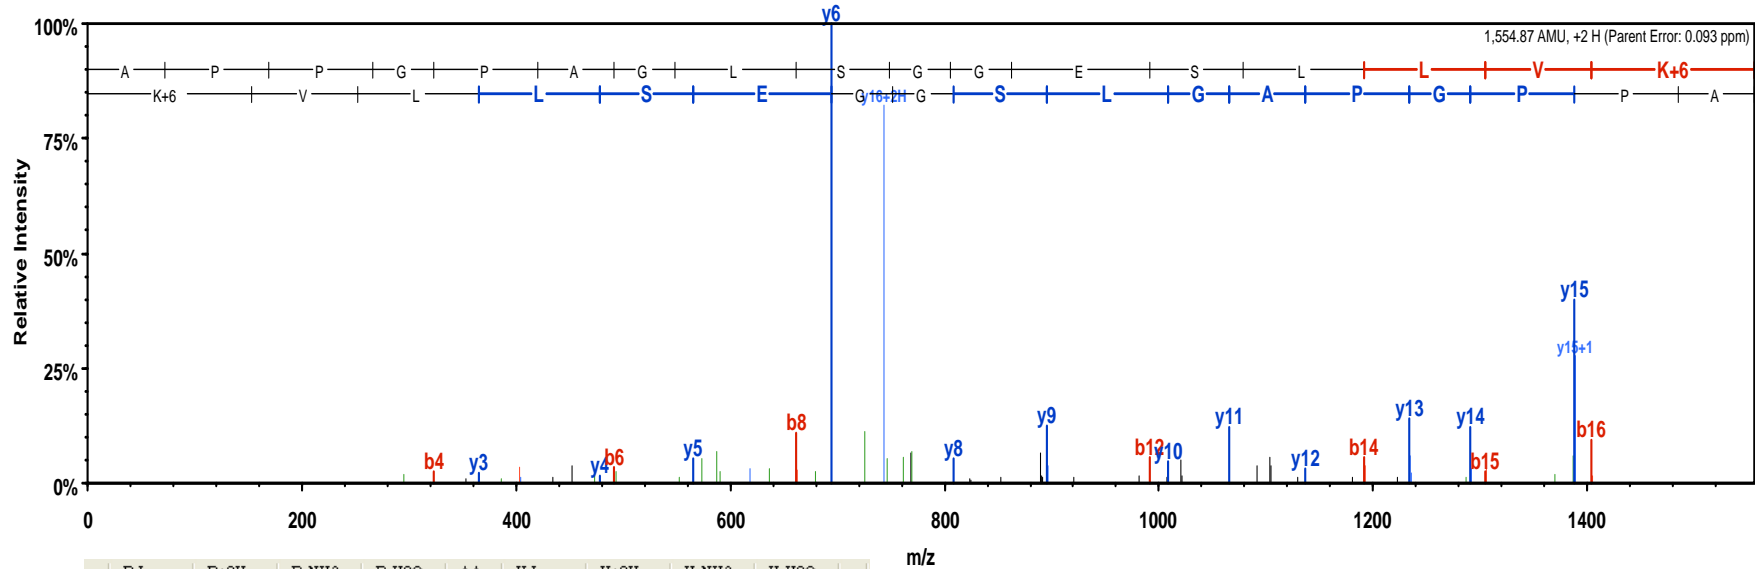

| ... | B Ions  | B+2H  | B-NH3   | B-H2O   | AA  | Y Ions  | Y+2H  | Y-NH3   | Y-H2O   | ... |
|-----|---------|-------|---------|---------|-----|---------|-------|---------|---------|-----|
| 1   | 72.0    |       |         |         | A   | 1,555.9 | 778.4 | 1,538.9 | 1,537.9 | 17  |
| 2   | 169.1   |       |         |         | P   | 1,484.8 | 742.9 | 1,467.8 | 1,466.8 | 16  |
| 3   | 266.1   |       |         |         | P   | 1,387.8 | 694.4 | 1,370.8 | 1,369.8 | 15  |
| 4   | 323.2   |       |         |         | G   | 1,290.7 | 645.9 | 1,273.7 | 1,272.7 | 14  |
| 5   | 420.2   |       |         |         | P   | 1,233.7 | 617.4 | 1,216.7 | 1,215.7 | 13  |
| 6   | 491.3   | 246.1 |         |         | A   | 1,136.7 | 568.8 | 1,119.6 | 1,118.7 | 12  |
| 7   | 548.3   | 274.6 |         |         | G   | 1,065.6 | 533.3 | 1,048.6 | 1,047.6 | 11  |
| 8   | 661.4   | 331.2 |         |         | L   | 1,008.6 | 504.8 | 991.6   | 990.6   | 10  |
| 9   | 748.4   | 374.7 |         | 730.4   | S   | 895.5   | 448.3 | 878.5   | 877.5   | 9   |
| 10  | 805.4   | 403.2 |         | 787.4   | G   | 808.5   | 404.7 | 791.5   | 790.5   | 8   |
| 11  | 862.4   | 431.7 |         | 844.4   | G   | 751.5   | 376.2 | 734.4   | 733.5   | 7   |
| 12  | 991.5   | 496.2 |         | 973.5   | E   | 694.4   | 347.7 | 677.4   | 676.4   | 6   |
| 13  | 1,078.5 | 539.8 |         | 1,060.5 | S   | 565.4   |       | 548.4   | 547.4   | 5   |
| 14  | 1,191.6 | 596.3 |         | 1,173.6 | L   | 478.4   |       | 461.3   |         | 4   |
| 15  | 1,304.7 | 652.8 |         | 1,286.7 | L   | 365.3   |       | 348.3   |         | 3   |
| 16  | 1,403.8 | 702.4 |         | 1,385.7 | V   | 252.2   |       | 235.2   |         | 2   |
| 17  | 1,555.9 | 778.4 | 1,538.9 | 1,537.9 | K+6 | 153.1   |       | 136.1   |         | 1   |

# Nuclear proteome

| Protein No. | Leading protein name   | Sequence                     | Mascot Score | Variable Modifications | SILAC State | Charge | m/z       |
|-------------|------------------------|------------------------------|--------------|------------------------|-------------|--------|-----------|
| N-52        | spIP21127/ICD2L1_HUMAN | EYSTAVDMWSVGCIFGELLTQKPLFPGK | 64.16        | Unmodified             | Light       | 3      | 1058.5277 |

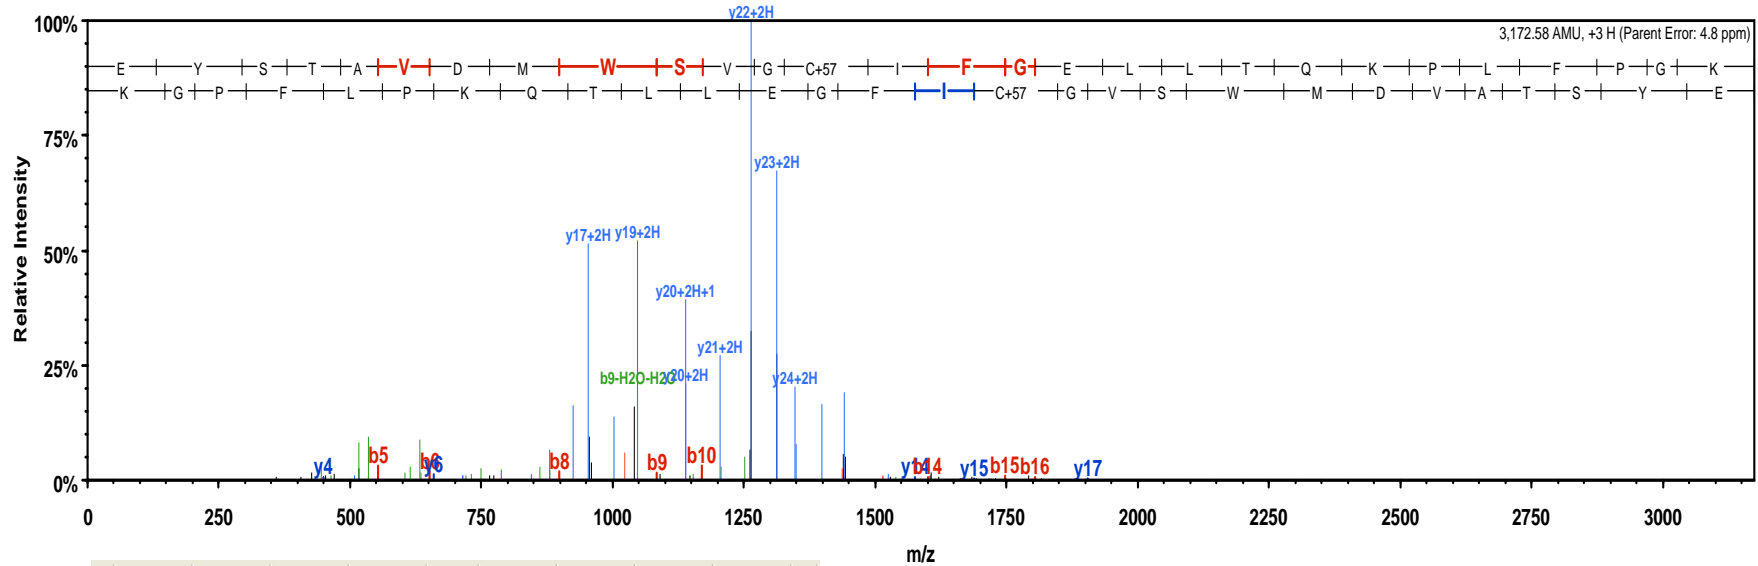

| ... | B Ions  | B+2H    | B-NH3   | B-H2O   | AA   | Y Ions  | Y+2H    | Y-NH3   | Y-H2O   | ... |
|-----|---------|---------|---------|---------|------|---------|---------|---------|---------|-----|
| 1   | 130.0   |         |         | 112.0   | E    | 3,173.6 | 1,587.3 | 3,156.5 | 3,155.6 | 28  |
| 2   | 293.1   |         |         | 275.1   | Y    | 3,044.5 | 1,522.8 | 3,027.5 | 3,026.5 | 27  |
| 3   | 380.1   |         |         | 362.1   | S    | 2,881.5 | 1,441.2 | 2,864.4 | 2,863.5 | 26  |
| 4   | 481.2   |         |         | 463.2   | T    | 2,794.4 | 1,397.7 | 2,777.4 | 2,776.4 | 25  |
| 5   | 552.2   |         |         | 534.2   | A    | 2,693.4 | 1,347.2 | 2,676.4 | 2,675.4 | 24  |
| 6   | 651.3   | 326.2   |         | 633.3   | V    | 2,622.3 | 1,311.7 | 2,605.3 | 2,604.3 | 23  |
| 7   | 766.3   | 383.7   |         | 748.3   | D    | 2,523.3 | 1,262.1 | 2,506.3 | 2,505.3 | 22  |
| 8   | 897.4   | 449.2   |         | 879.4   | M    | 2,408.3 | 1,204.6 | 2,391.2 | 2,390.2 | 21  |
| 9   | 1,083.4 | 542.2   |         | 1,065.4 | W    | 2,277.2 | 1,139.1 | 2,260.2 | 2,259.2 | 20  |
| 10  | 1,170.5 | 585.7   |         | 1,152.5 | S    | 2,091.1 | 1,046.1 | 2,074.1 | 2,073.1 | 19  |
| 11  | 1,269.5 | 635.3   |         | 1,251.5 | V    | 2,004.1 | 1,002.6 | 1,987.1 | 1,986.1 | 18  |
| 12  | 1,326.6 | 663.8   |         | 1,308.6 | G    | 1,905.0 | 953.0   | 1,888.0 | 1,887.0 | 17  |
| 13  | 1,486.6 | 743.8   |         | 1,468.6 | C+57 | 1,848.0 | 924.5   | 1,831.0 | 1,830.0 | 16  |
| 14  | 1,599.7 | 800.3   |         | 1,581.7 | I    | 1,688.0 | 844.5   | 1,671.0 | 1,670.0 | 15  |
| 15  | 1,746.8 | 873.9   |         | 1,728.7 | F    | 1,574.9 | 788.0   | 1,557.9 | 1,556.9 | 14  |
| 16  | 1,803.8 | 902.4   |         | 1,785.8 | G    | 1,427.8 | 714.4   | 1,410.8 | 1,409.8 | 13  |
| 17  | 1,932.8 | 966.9   |         | 1,914.8 | E    | 1,370.8 | 685.9   | 1,353.8 | 1,352.8 | 12  |
| 18  | 2,045.9 | 1,023.5 |         | 2,027.9 | L    | 1,241.8 | 621.4   | 1,224.7 | 1,223.8 | 11  |
| 19  | 2,159.0 | 1,080.0 |         | 2,141.0 | L    | 1,128.7 | 564.8   | 1,111.7 | 1,110.7 | 10  |
| 20  | 2,260.0 | 1,130.5 |         | 2,242.0 | T    | 1,015.6 | 508.3   | 998.6   | 997.6   | 9   |
| 21  | 2,388.1 | 1,194.5 | 2,371.1 | 2,370.1 | Q    | 914.5   | 457.8   | 897.5   |         | 8   |
| 22  | 2,516.2 | 1,258.6 | 2,499.2 | 2,498.2 | K    | 786.5   | 393.7   | 769.5   |         | 7   |
| 23  | 2,613.2 | 1,307.1 | 2,596.2 | 2,595.2 | P    | 658.4   | 329.7   | 641.4   |         | 6   |
| 24  | 2,726.3 | 1,363.7 | 2,709.3 | 2,708.3 | L    | 561.3   |         | 544.3   |         | 5   |
| 25  | 2,873.4 | 1,437.2 | 2,856.4 | 2,855.4 | F    | 448.3   |         | 431.2   |         | 4   |
| 26  | 2,970.4 | 1,485.7 | 2,953.4 | 2,952.4 | P    | 301.2   |         | 284.2   |         | 3   |
| 27  | 3,027.5 | 1,514.2 | 3,010.4 | 3,009.5 | G    | 204.1   |         | 187.1   |         | 2   |
| 28  | 3,173.6 | 1,587.3 | 3,156.5 | 3,155.6 | K    | 147.1   |         | 130.1   |         | 1   |

# Nuclear proteome

| Protein No. | Leading protein name  | Sequence     | Mascot Score | Variable Modifications | SILAC State | Charge | m/z       |
|-------------|-----------------------|--------------|--------------|------------------------|-------------|--------|-----------|
| N-53        | sp Q96GG9 DCNL1_HUMAN | TAVSCLSQNDWK | 64.13        | Unmodified             | Heavy       | 2      | 704.82991 |

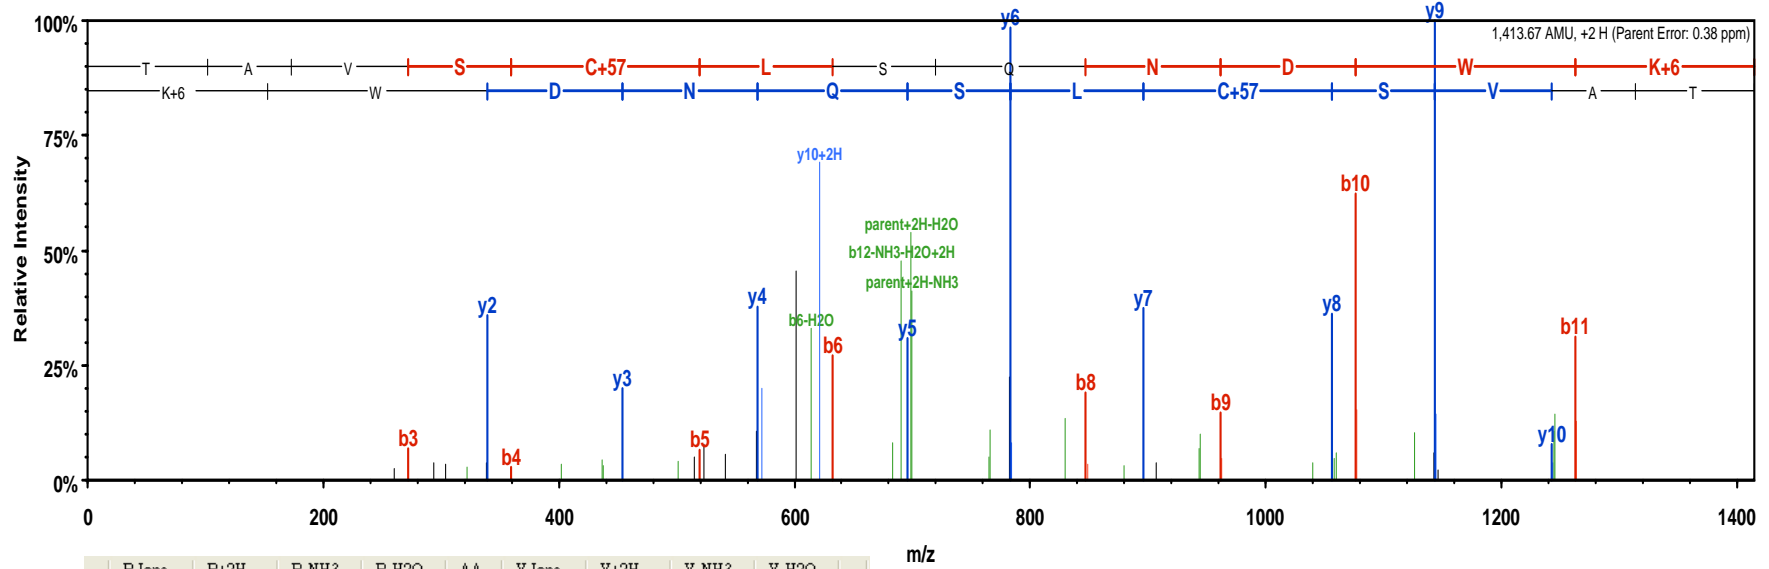

| ... | B Ions  | B+2H  | B-NH3   | B-H2O   | AA   | Y Ions  | Y+2H  | Y-NH3   | Y-H2O   | ... |
|-----|---------|-------|---------|---------|------|---------|-------|---------|---------|-----|
| 1   | 102.1   |       |         | 84.0    | T    | 1,414.7 | 707.8 | 1,397.6 | 1,396.7 | 12  |
| 2   | 173.1   |       |         | 155.1   | A    | 1,313.6 | 657.3 | 1,296.6 | 1,295.6 | 11  |
| 3   | 272.2   |       |         | 254.1   | V    | 1,242.6 | 621.8 | 1,225.6 | 1,224.6 | 10  |
| 4   | 359.2   |       |         | 341.2   | S    | 1,143.5 | 572.3 | 1,126.5 | 1,125.5 | 9   |
| 5   | 519.2   |       |         | 501.2   | C+57 | 1,056.5 | 528.7 | 1,039.5 | 1,038.5 | 8   |
| 6   | 632.3   | 316.7 |         | 614.3   | L    | 896.5   | 448.7 | 879.4   | 878.4   | 7   |
| 7   | 719.3   | 360.2 |         | 701.3   | S    | 783.4   | 392.2 | 766.3   | 765.4   | 6   |
| 8   | 847.4   | 424.2 | 830.4   | 829.4   | Q    | 696.3   |       | 679.3   | 678.3   | 5   |
| 9   | 961.4   | 481.2 | 944.4   | 943.4   | N    | 568.3   |       | 551.3   | 550.3   | 4   |
| 10  | 1,076.5 | 538.7 | 1,059.4 | 1,058.5 | D    | 454.2   |       | 437.2   | 436.2   | 3   |
| 11  | 1,262.5 | 631.8 | 1,245.5 | 1,244.5 | W    | 339.2   |       | 322.2   |         | 2   |
| 12  | 1,414.7 | 707.8 | 1,397.6 | 1,396.7 | K+6  | 153.1   |       | 136.1   |         | 1   |

# Nuclear proteome

| Protein No. | Leading protein name | Sequence        | Mascot Score | Variable Modifications | SILAC State | Charge | m/z      |
|-------------|----------------------|-----------------|--------------|------------------------|-------------|--------|----------|
| N-54        | sp Q16851 UGPA_HUMAN | ILTTASSHEFEHTKK | 63.61        | Unmodified             | Heavy       | 2      | 864.9494 |

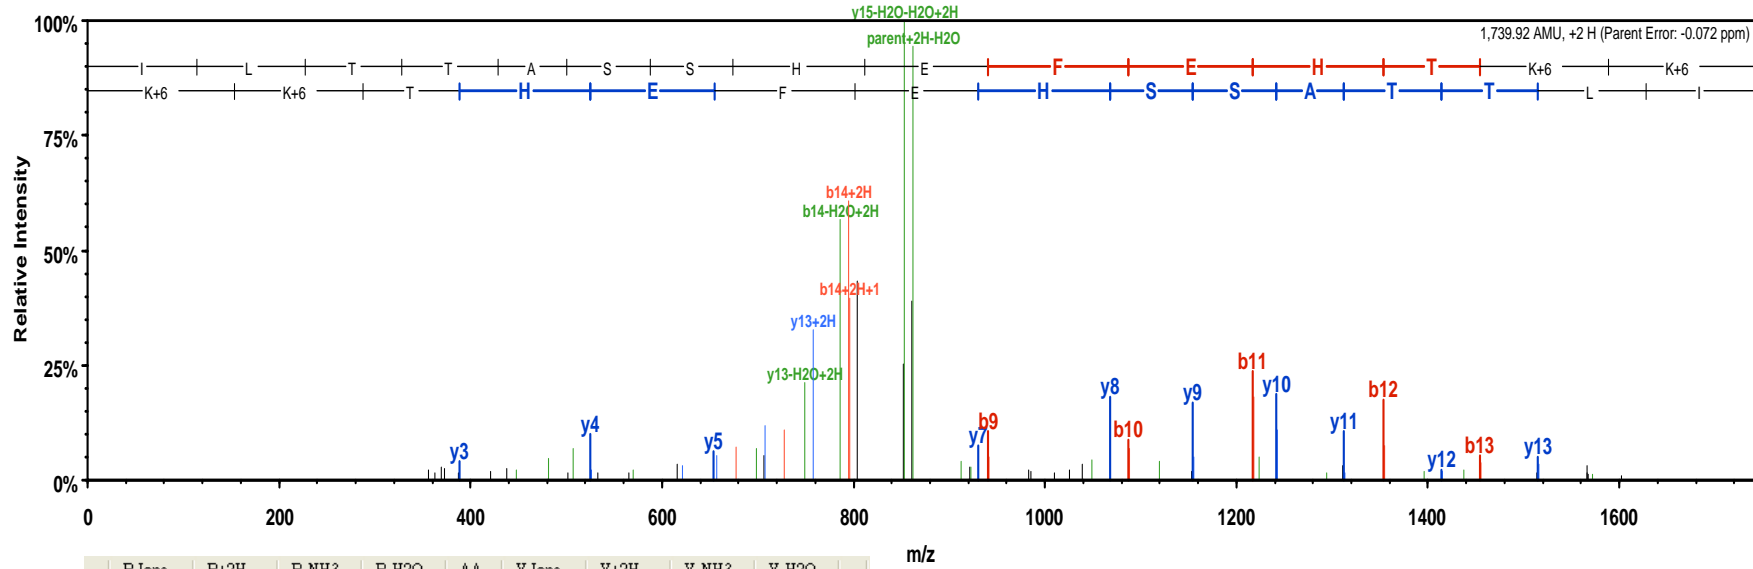

| ... | B Ions  | B+2H  | B-NH3   | B-H2O   | AA  | Y Ions  | Y+2H  | Y-NH3   | Y-H2O   | ... |
|-----|---------|-------|---------|---------|-----|---------|-------|---------|---------|-----|
| 1   | 114.1   |       |         |         | I   | 1,740.9 | 871.0 | 1,723.9 | 1,722.9 | 15  |
| 2   | 227.2   |       |         |         | L   | 1,627.8 | 814.4 | 1,610.8 | 1,609.8 | 14  |
| 3   | 328.2   |       |         | 310.2   | T   | 1,514.8 | 757.9 | 1,497.7 | 1,496.8 | 13  |
| 4   | 429.3   |       |         | 411.3   | T   | 1,413.7 | 707.4 | 1,396.7 | 1,395.7 | 12  |
| 5   | 500.3   |       |         | 482.3   | A   | 1,312.7 | 656.8 | 1,295.6 | 1,294.7 | 11  |
| 6   | 587.3   | 294.2 |         | 569.3   | S   | 1,241.6 | 621.3 | 1,224.6 | 1,223.6 | 10  |
| 7   | 674.4   | 337.7 |         | 656.4   | S   | 1,154.6 | 577.8 | 1,137.6 | 1,136.6 | 9   |
| 8   | 811.4   | 406.2 |         | 793.4   | H   | 1,067.6 | 534.3 | 1,050.5 | 1,049.6 | 8   |
| 9   | 940.5   | 470.7 |         | 922.5   | E   | 930.5   | 465.8 | 913.5   | 912.5   | 7   |
| 10  | 1,087.5 | 544.3 |         | 1,069.5 | F   | 801.5   | 401.2 | 784.4   | 783.5   | 6   |
| 11  | 1,216.6 | 608.8 |         | 1,198.6 | E   | 654.4   | 327.7 | 637.4   | 636.4   | 5   |
| 12  | 1,353.6 | 677.3 |         | 1,335.6 | H   | 525.4   | 263.2 | 508.3   | 507.3   | 4   |
| 13  | 1,454.7 | 727.8 |         | 1,436.7 | T   | 388.3   | 194.7 | 371.3   | 370.3   | 3   |
| 14  | 1,588.8 | 794.9 | 1,571.8 | 1,570.8 | K+6 | 287.2   | 144.1 | 270.2   |         | 2   |
| 15  | 1,740.9 | 871.0 | 1,723.9 | 1,722.9 | K+6 | 153.1   |       | 136.1   |         | 1   |

# Nuclear proteome

| Protein No. | Leading protein name | Sequence              | Mascot Score | Variable Modifications | SILAC State | Charge | m/z       |
|-------------|----------------------|-----------------------|--------------|------------------------|-------------|--------|-----------|
| N-55        | sp O60921 HUS1_HUMAN | DLQEPVVVDPDPVSIYLPVLK | 63.45        | Unmodified             | Light       | 2      | 1118.6092 |

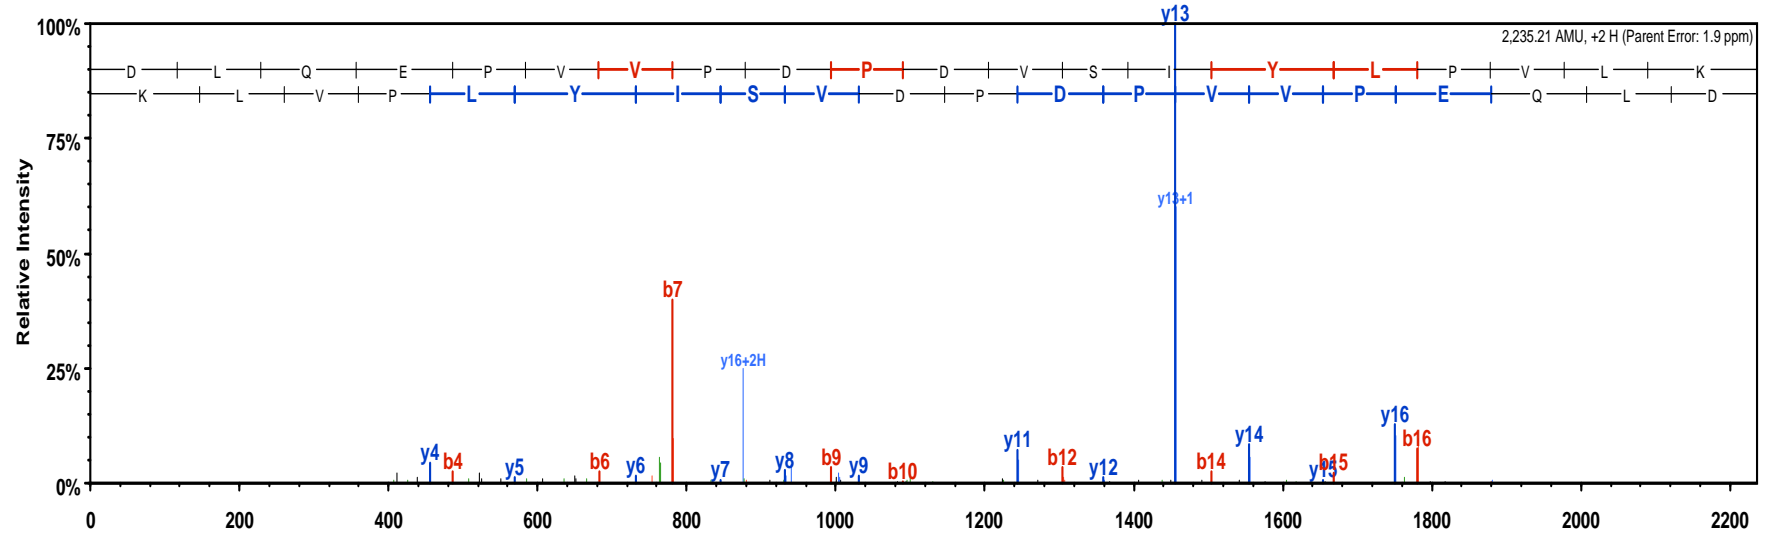

| ... | B Ions  | B+2H    | B-NH3   | B-H2O   | AA | Y Ions  | Y+2H    | Y-NH3   | Y-H2O   | ... |
|-----|---------|---------|---------|---------|----|---------|---------|---------|---------|-----|
| 1   | 116.0   |         |         | 98.0    | D  | 2,236.2 | 1,118.6 | 2,219.2 | 2,218.2 | 20  |
| 2   | 229.1   |         |         | 211.1   | L  | 2,121.2 | 1,061.1 | 2,104.2 | 2,103.2 | 19  |
| 3   | 357.2   |         | 340.2   | 339.2   | Q  | 2,008.1 | 1,004.6 | 1,991.1 | 1,990.1 | 18  |
| 4   | 486.2   |         | 469.2   | 468.2   | E  | 1,880.0 | 940.5   | 1,863.0 | 1,862.0 | 17  |
| 5   | 583.3   |         | 566.2   | 565.3   | P  | 1,751.0 | 876.0   | 1,734.0 | 1,733.0 | 16  |
| 6   | 682.3   | 341.7   | 665.3   | 664.3   | V  | 1,653.9 | 827.5   | 1,636.9 | 1,635.9 | 15  |
| 7   | 781.4   | 391.2   | 764.4   | 763.4   | V  | 1,554.9 | 777.9   | 1,537.9 | 1,536.9 | 14  |
| 8   | 878.5   | 439.7   | 861.4   | 860.5   | P  | 1,455.8 | 728.4   | 1,438.8 | 1,437.8 | 13  |
| 9   | 993.5   | 497.2   | 976.5   | 975.5   | D  | 1,358.8 | 679.9   | 1,341.7 | 1,340.7 | 12  |
| 10  | 1,090.5 | 545.8   | 1,073.5 | 1,072.5 | P  | 1,243.7 | 622.4   | 1,226.7 | 1,225.7 | 11  |
| 11  | 1,205.6 | 603.3   | 1,188.5 | 1,187.6 | D  | 1,146.7 | 573.8   | 1,129.7 | 1,128.7 | 10  |
| 12  | 1,304.6 | 652.8   | 1,287.6 | 1,286.6 | V  | 1,031.7 | 516.3   | 1,014.6 | 1,013.6 | 9   |
| 13  | 1,391.7 | 696.3   | 1,374.6 | 1,373.7 | S  | 932.6   | 466.8   | 915.6   | 914.6   | 8   |
| 14  | 1,504.8 | 752.9   | 1,487.7 | 1,486.7 | I  | 845.5   | 423.3   | 828.5   |         | 7   |
| 15  | 1,667.8 | 834.4   | 1,650.8 | 1,649.8 | Y  | 732.5   | 366.7   | 715.4   |         | 6   |
| 16  | 1,780.9 | 891.0   | 1,763.9 | 1,762.9 | L  | 569.4   |         | 552.4   |         | 5   |
| 17  | 1,878.0 | 939.5   | 1,860.9 | 1,859.9 | P  | 456.3   |         | 439.3   |         | 4   |
| 18  | 1,977.0 | 989.0   | 1,960.0 | 1,959.0 | V  | 359.3   |         | 342.2   |         | 3   |
| 19  | 2,090.1 | 1,045.6 | 2,073.1 | 2,072.1 | L  | 260.2   |         | 243.2   |         | 2   |
| 20  | 2,236.2 | 1,118.6 | 2,219.2 | 2,218.2 | K  | 147.1   |         | 130.1   |         | 1   |



# Nuclear proteome

| Protein No. | Leading protein name  | Sequence  | Mascot Score | Variable Modifications  | SILAC State | Charge | m/z       |
|-------------|-----------------------|-----------|--------------|-------------------------|-------------|--------|-----------|
| N-56        | sp Q9Y421 FA32A_HUMAN | MEAYEQVQK | 63.37        | Acetyl (Protein N-term) | Light       | 2      | 584.27116 |

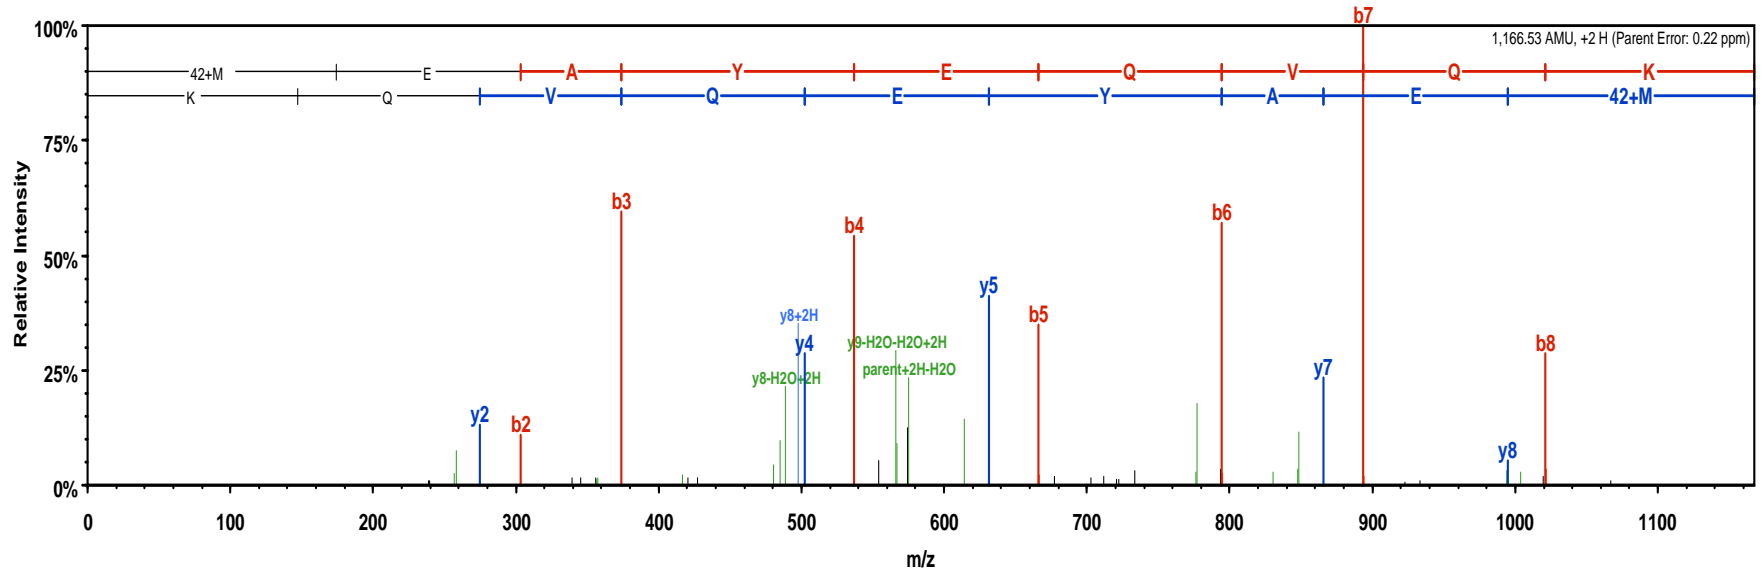

| ... | B Ions  | B+2H  | B-NH3   | B-H2O   | AA   | Y Ions  | Y+2H  | Y-NH3   | Y-H2O   | ... |
|-----|---------|-------|---------|---------|------|---------|-------|---------|---------|-----|
| 1   | 174.1   |       |         |         | M+42 | 1,167.5 | 584.3 | 1,150.5 | 1,149.5 | 9   |
| 2   | 303.1   |       |         | 285.1   | E    | 994.5   | 497.7 | 977.5   | 976.5   | 8   |
| 3   | 374.1   |       |         | 356.1   | A    | 865.4   | 433.2 | 848.4   | 847.4   | 7   |
| 4   | 537.2   |       |         | 519.2   | Y    | 794.4   | 397.7 | 777.4   | 776.4   | 6   |
| 5   | 666.2   |       |         | 648.2   | E    | 631.3   |       | 614.3   | 613.3   | 5   |
| 6   | 794.3   | 397.7 | 777.3   | 776.3   | Q    | 502.3   |       | 485.3   |         | 4   |
| 7   | 893.4   | 447.2 | 876.3   | 875.4   | Y    | 374.2   |       | 357.2   |         | 3   |
| 8   | 1,021.4 | 511.2 | 1,004.4 | 1,003.4 | Q    | 275.2   |       | 258.1   |         | 2   |
| 9   | 1,167.5 | 584.3 | 1,150.5 | 1,149.5 | K    | 147.1   |       | 130.1   |         | 1   |

# Nuclear proteome

| Protein No. | Leading protein name  | Sequence              | Mascot Score | Variable Modifications | SILAC State | Charge | m/z       |
|-------------|-----------------------|-----------------------|--------------|------------------------|-------------|--------|-----------|
| N-57        | sp P48739 PIPNB_HUMAN | SQVEPADYKADEDPALFQSVK | 62.78        | Unmodified             | Light       | 2      | 1169.0659 |

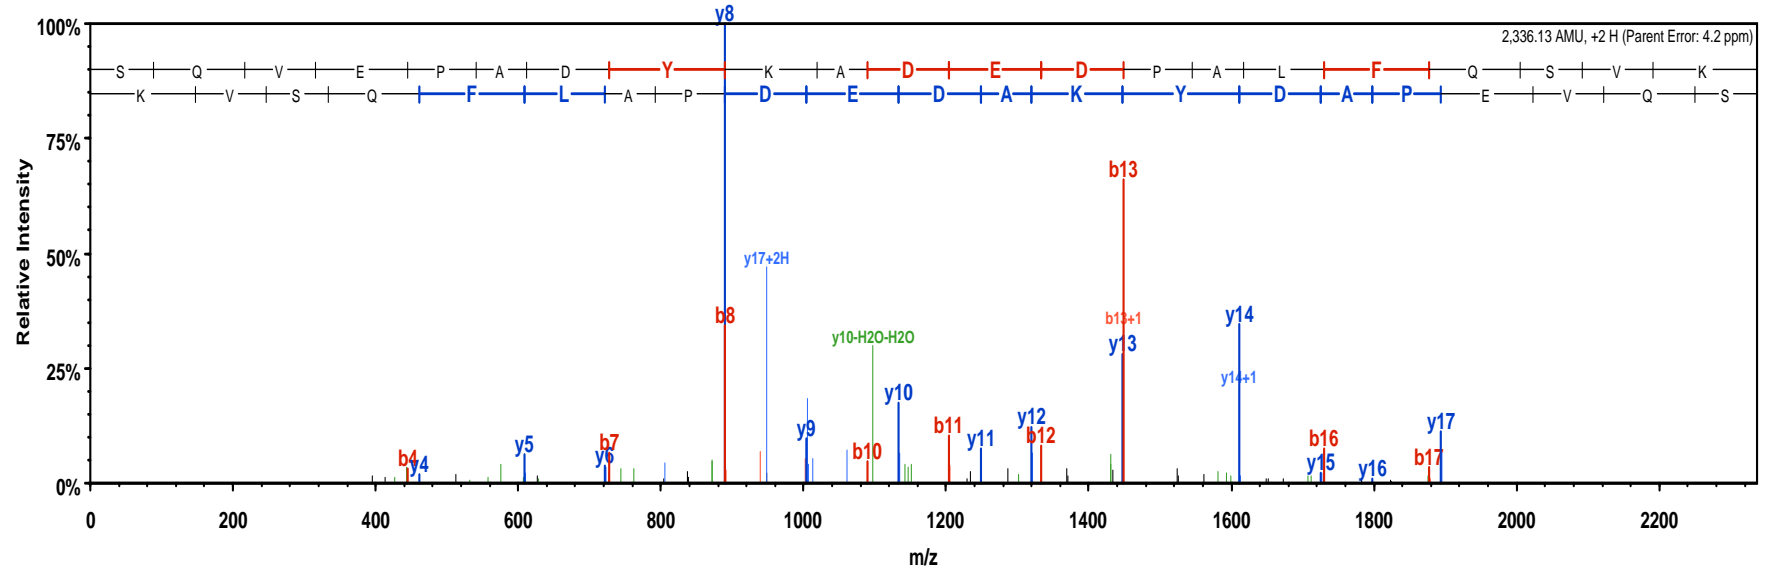

| ... | B Ions  | B+2H    | B-NH3   | B-H2O   | AA | Y Ions  | Y+2H    | Y-NH3   | Y-H2O   | ... |
|-----|---------|---------|---------|---------|----|---------|---------|---------|---------|-----|
| 1   | 88.0    |         |         | 70.0    | S  | 2,337.1 | 1,169.1 | 2,320.1 | 2,319.1 | 21  |
| 2   | 216.1   |         | 199.1   | 198.1   | Q  | 2,250.1 | 1,125.6 | 2,233.1 | 2,232.1 | 20  |
| 3   | 315.2   |         | 298.1   | 297.2   | V  | 2,122.0 | 1,061.5 | 2,105.0 | 2,104.0 | 19  |
| 4   | 444.2   |         | 427.2   | 426.2   | E  | 2,023.0 | 1,012.0 | 2,005.9 | 2,005.0 | 18  |
| 5   | 541.3   |         | 524.2   | 523.3   | P  | 1,893.9 | 947.5   | 1,876.9 | 1,875.9 | 17  |
| 6   | 612.3   | 306.7   | 595.3   | 594.3   | A  | 1,796.9 | 898.9   | 1,779.8 | 1,778.9 | 16  |
| 7   | 727.3   | 364.2   | 710.3   | 709.3   | D  | 1,725.8 | 863.4   | 1,708.8 | 1,707.8 | 15  |
| 8   | 890.4   | 445.7   | 873.4   | 872.4   | Y  | 1,610.8 | 805.9   | 1,593.8 | 1,592.8 | 14  |
| 9   | 1,018.5 | 509.7   | 1,001.5 | 1,000.5 | K  | 1,447.7 | 724.4   | 1,430.7 | 1,429.7 | 13  |
| 10  | 1,089.5 | 545.3   | 1,072.5 | 1,071.5 | A  | 1,319.6 | 660.3   | 1,302.6 | 1,301.6 | 12  |
| 11  | 1,204.5 | 602.8   | 1,187.5 | 1,186.5 | D  | 1,248.6 | 624.8   | 1,231.6 | 1,230.6 | 11  |
| 12  | 1,333.6 | 667.3   | 1,316.6 | 1,315.6 | E  | 1,133.6 | 567.3   | 1,116.6 | 1,115.6 | 10  |
| 13  | 1,448.6 | 724.8   | 1,431.6 | 1,430.6 | D  | 1,004.5 | 502.8   | 987.5   | 986.5   | 9   |
| 14  | 1,545.7 | 773.3   | 1,528.6 | 1,527.7 | P  | 889.5   | 445.3   | 872.5   | 871.5   | 8   |
| 15  | 1,616.7 | 808.9   | 1,599.7 | 1,598.7 | A  | 792.5   | 396.7   | 775.4   | 774.5   | 7   |
| 16  | 1,729.8 | 865.4   | 1,712.8 | 1,711.8 | L  | 721.4   | 361.2   | 704.4   | 703.4   | 6   |
| 17  | 1,876.9 | 938.9   | 1,859.8 | 1,858.8 | F  | 608.3   |         | 591.3   | 590.3   | 5   |
| 18  | 2,004.9 | 1,003.0 | 1,987.9 | 1,986.9 | Q  | 461.3   |         | 444.2   | 443.3   | 4   |
| 19  | 2,092.0 | 1,046.5 | 2,074.9 | 2,073.9 | S  | 333.2   |         | 316.2   | 315.2   | 3   |
| 20  | 2,191.0 | 1,096.0 | 2,174.0 | 2,173.0 | V  | 246.2   |         | 229.2   |         | 2   |
| 21  | 2,337.1 | 1,169.1 | 2,320.1 | 2,319.1 | K  | 147.1   |         | 130.1   |         | 1   |

# Nuclear proteome

| Protein No. | Leading protein name | Sequence           | Mascot Score | Variable Modifications | SILAC State | Charge | m/z       |
|-------------|----------------------|--------------------|--------------|------------------------|-------------|--------|-----------|
| N-58        | sp Q9Y639 NPTN_HUMAN | AEDSGEYHCVYHFVSAPK | 62.25        | Unmodified             | Heavy       | 2      | 1048.4625 |

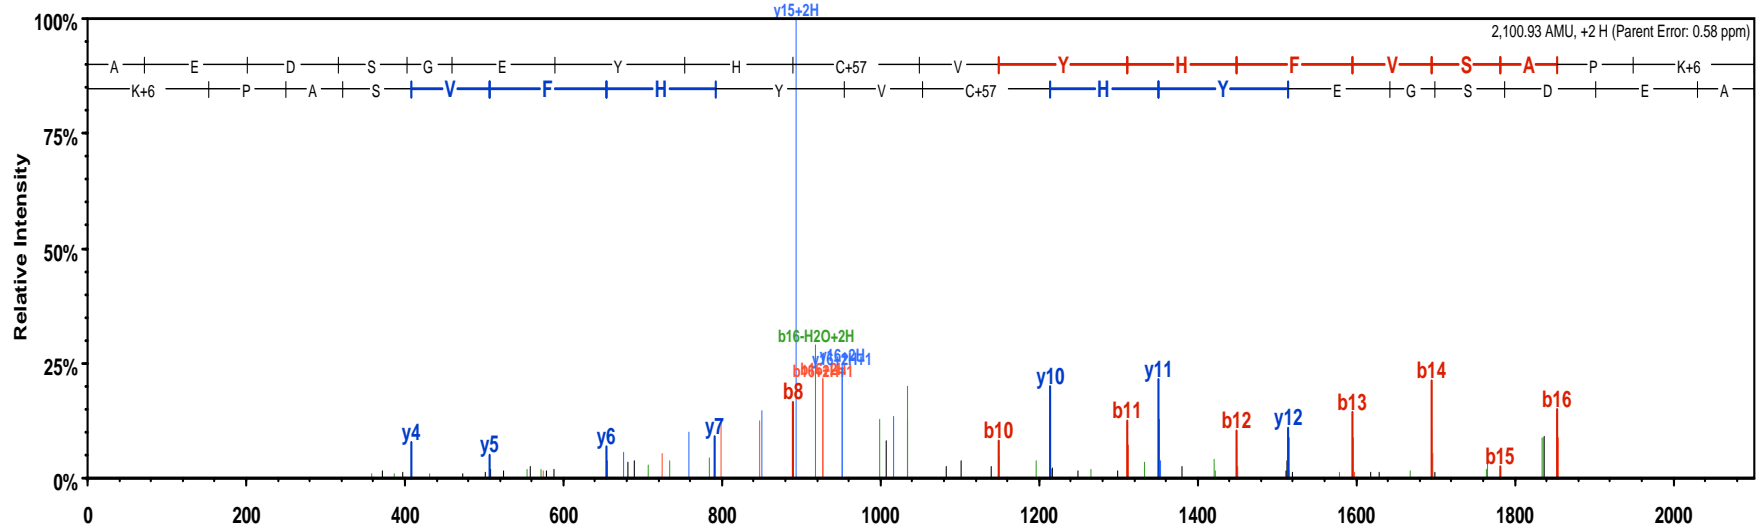

| ... | B Ions  | B+2H    | B-NH3   | B-H2O   | AA   | Y Ions  | Y+2H    | Y-NH3   | Y-H2O   | ... |
|-----|---------|---------|---------|---------|------|---------|---------|---------|---------|-----|
| 1   | 72.0    |         |         |         | A    | 2,101.9 | 1,051.5 | 2,084.9 | 2,083.9 | 18  |
| 2   | 201.1   |         |         | 183.1   | E    | 2,030.9 | 1,016.0 | 2,013.9 | 2,012.9 | 17  |
| 3   | 316.1   |         |         | 298.1   | D    | 1,901.9 | 951.4   | 1,884.8 | 1,883.8 | 16  |
| 4   | 403.1   |         |         | 385.1   | S    | 1,786.8 | 893.9   | 1,769.8 | 1,768.8 | 15  |
| 5   | 460.2   |         |         | 442.2   | G    | 1,699.8 | 850.4   | 1,682.8 | 1,681.8 | 14  |
| 6   | 589.2   | 295.1   |         | 571.2   | E    | 1,642.8 | 821.9   | 1,625.8 | 1,624.8 | 13  |
| 7   | 752.3   | 376.6   |         | 734.3   | Y    | 1,513.7 | 757.4   | 1,496.7 | 1,495.7 | 12  |
| 8   | 889.3   | 445.2   |         | 871.3   | H    | 1,350.7 | 675.8   | 1,333.6 | 1,332.7 | 11  |
| 9   | 1,049.4 | 525.2   |         | 1,031.4 | C+57 | 1,213.6 | 607.3   | 1,196.6 | 1,195.6 | 10  |
| 10  | 1,148.4 | 574.7   |         | 1,130.4 | V    | 1,053.6 | 527.3   | 1,036.6 | 1,035.6 | 9   |
| 11  | 1,311.5 | 656.3   |         | 1,293.5 | Y    | 954.5   | 477.8   | 937.5   | 936.5   | 8   |
| 12  | 1,448.6 | 724.8   |         | 1,430.5 | H    | 791.5   | 396.2   | 774.4   | 773.4   | 7   |
| 13  | 1,595.6 | 798.3   |         | 1,577.6 | F    | 654.4   | 327.7   | 637.4   | 636.4   | 6   |
| 14  | 1,694.7 | 847.8   |         | 1,676.7 | V    | 507.3   |         | 490.3   | 489.3   | 5   |
| 15  | 1,781.7 | 891.4   |         | 1,763.7 | S    | 408.3   |         | 391.2   | 390.2   | 4   |
| 16  | 1,852.8 | 926.9   |         | 1,834.7 | A    | 321.2   |         | 304.2   |         | 3   |
| 17  | 1,949.8 | 975.4   |         | 1,931.8 | P    | 250.2   |         | 233.2   |         | 2   |
| 18  | 2,101.9 | 1,051.5 | 2,084.9 | 2,083.9 | K+6  | 153.1   |         | 136.1   |         | 1   |

# Nuclear proteome

| Protein No. | Leading protein name | Sequence     | Mascot Score | Variable Modifications | SILAC State | Charge | m/z       |
|-------------|----------------------|--------------|--------------|------------------------|-------------|--------|-----------|
| N-59        | spIP57721PCBP3_HUMAN | QICVVMLESPPK | 53.6         | Unmodified             | Heavy       | 2      | 700.86745 |

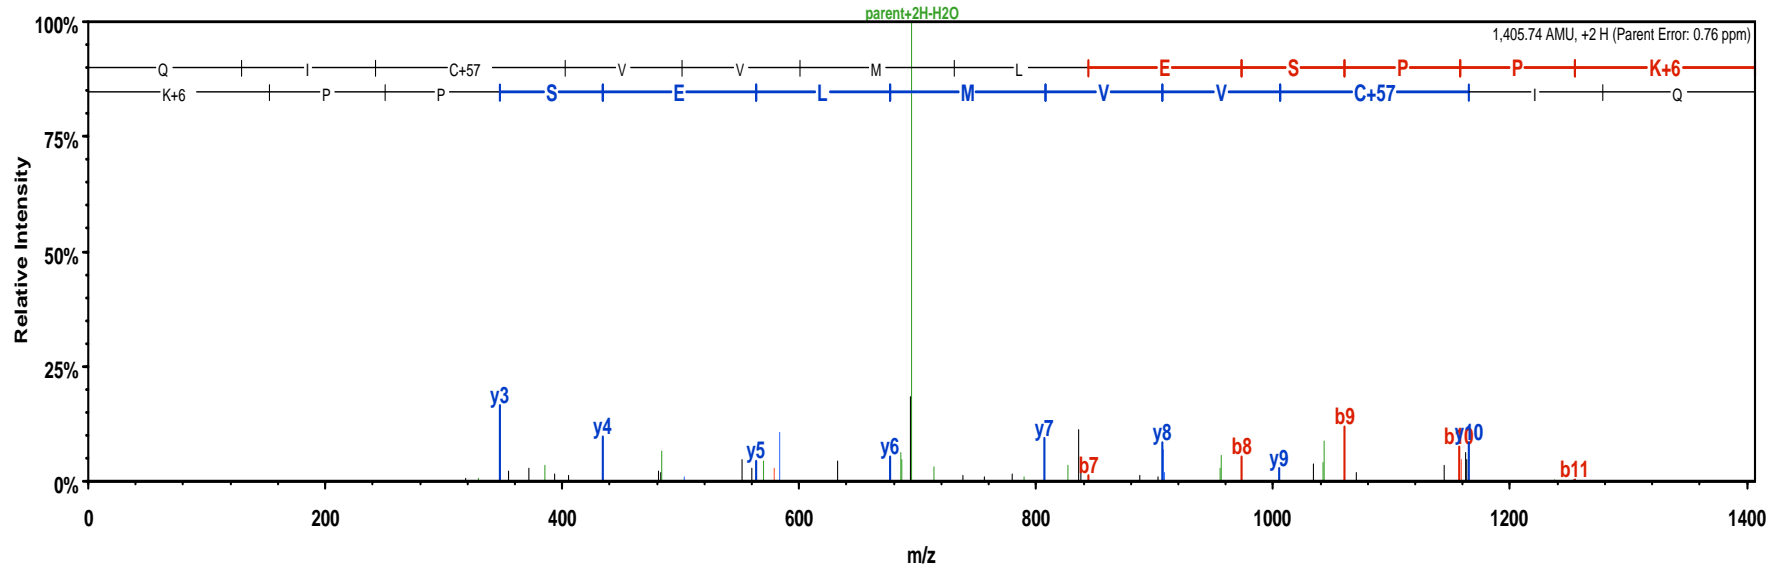

| ... | B Ions  | B+2H  | B-NH3   | B-H2O   | AA   | Y Ions  | Y+2H  | Y-NH3   | Y-H2O   | ... |
|-----|---------|-------|---------|---------|------|---------|-------|---------|---------|-----|
| 1   | 129.1   |       | 112.0   |         | Q    | 1,406.7 | 703.9 | 1,389.7 | 1,388.7 | 12  |
| 2   | 242.1   |       | 225.1   |         | I    | 1,278.7 | 639.8 | 1,261.7 | 1,260.7 | 11  |
| 3   | 402.2   |       | 385.2   |         | C+57 | 1,165.6 | 583.3 | 1,148.6 | 1,147.6 | 10  |
| 4   | 501.2   |       | 484.2   |         | V    | 1,005.6 | 503.3 | 988.5   | 987.6   | 9   |
| 5   | 600.3   |       | 583.3   |         | V    | 906.5   | 453.8 | 889.5   | 888.5   | 8   |
| 6   | 731.4   | 366.2 | 714.3   |         | M    | 807.4   | 404.2 | 790.4   | 789.4   | 7   |
| 7   | 844.4   | 422.7 | 827.4   |         | L    | 676.4   | 338.7 | 659.4   | 658.4   | 6   |
| 8   | 973.5   | 487.2 | 956.5   | 955.5   | E    | 563.3   |       | 546.3   | 545.3   | 5   |
| 9   | 1,060.5 | 530.8 | 1,043.5 | 1,042.5 | S    | 434.3   |       | 417.2   | 416.3   | 4   |
| 10  | 1,157.6 | 579.3 | 1,140.5 | 1,139.6 | P    | 347.2   |       | 330.2   |         | 3   |
| 11  | 1,254.6 | 627.8 | 1,237.6 | 1,236.6 | P    | 250.2   |       | 233.2   |         | 2   |
| 12  | 1,406.7 | 703.9 | 1,389.7 | 1,388.7 | K+6  | 153.1   |       | 136.1   |         | 1   |

# Nuclear proteome

| Protein No. | Leading protein name  | Sequence          | Mascot Score | Variable Modifications | SILAC State | Charge | m/z       |
|-------------|-----------------------|-------------------|--------------|------------------------|-------------|--------|-----------|
| N-60        | sp Q92520 FAM3C_HUMAN | YFDMWGGDVAPFIEFLK | 60.18        | Unmodified             | Light       | 2      | 1017.9871 |

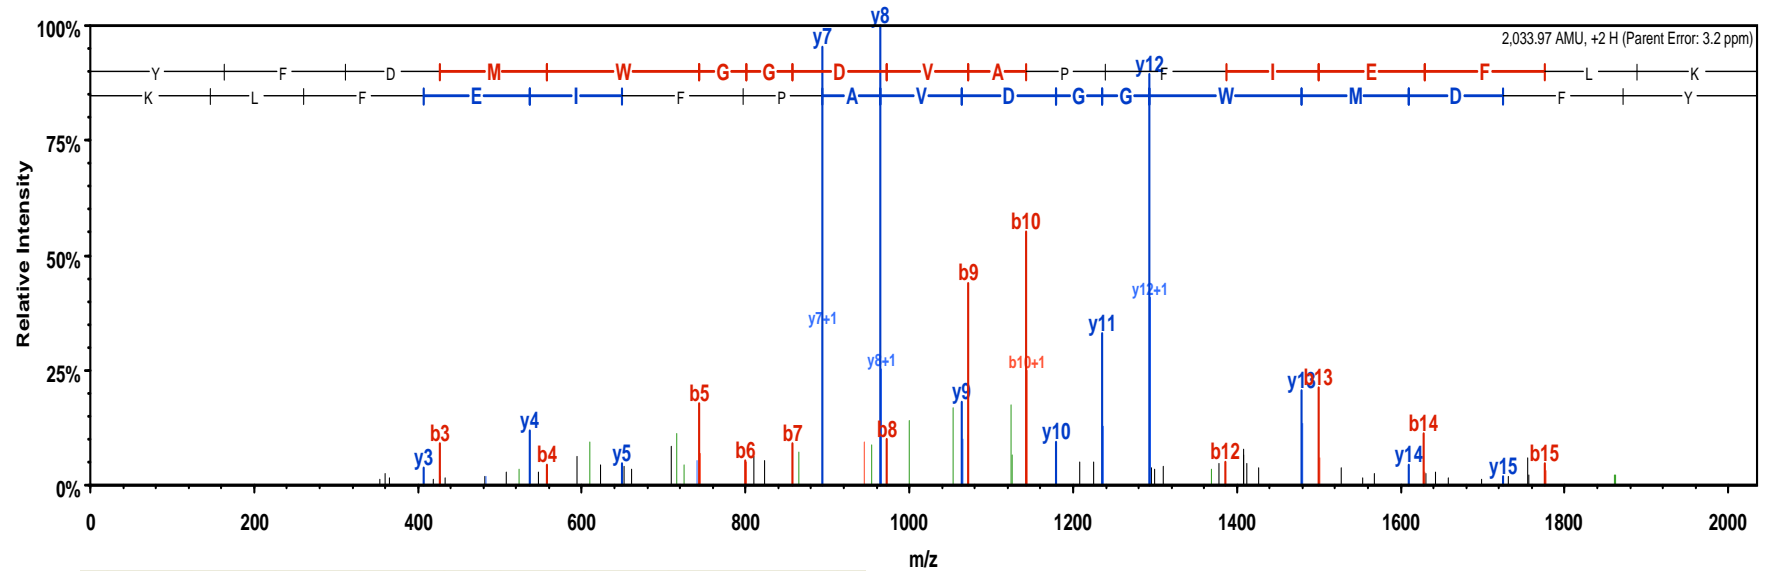

| ... | B Ions  | B+2H    | B-NH3   | B-H2O   | AA | Y Ions  | Y+2H    | Y-NH3   | Y-H2O   | ... |
|-----|---------|---------|---------|---------|----|---------|---------|---------|---------|-----|
| 1   | 164.1   |         |         |         | Y  | 2,035.0 | 1,018.0 | 2,017.9 | 2,017.0 | 17  |
| 2   | 311.1   |         |         |         | F  | 1,871.9 | 936.5   | 1,854.9 | 1,853.9 | 16  |
| 3   | 426.2   |         |         | 408.2   | D  | 1,724.8 | 862.9   | 1,707.8 | 1,706.8 | 15  |
| 4   | 557.2   |         |         | 539.2   | M  | 1,609.8 | 805.4   | 1,592.8 | 1,591.8 | 14  |
| 5   | 743.3   |         |         | 725.3   | W  | 1,478.8 | 739.9   | 1,461.7 | 1,460.8 | 13  |
| 6   | 800.3   | 400.7   |         | 782.3   | G  | 1,292.7 | 646.8   | 1,275.7 | 1,274.7 | 12  |
| 7   | 857.3   | 429.2   |         | 839.3   | G  | 1,235.7 | 618.3   | 1,218.6 | 1,217.7 | 11  |
| 8   | 972.4   | 486.7   |         | 954.3   | D  | 1,178.6 | 589.8   | 1,161.6 | 1,160.6 | 10  |
| 9   | 1,071.4 | 536.2   |         | 1,053.4 | Y  | 1,063.6 | 532.3   | 1,046.6 | 1,045.6 | 9   |
| 10  | 1,142.5 | 571.7   |         | 1,124.5 | A  | 964.6   | 482.8   | 947.5   | 946.5   | 8   |
| 11  | 1,239.5 | 620.3   |         | 1,221.5 | P  | 893.5   | 447.3   | 876.5   | 875.5   | 7   |
| 12  | 1,386.6 | 693.8   |         | 1,368.6 | F  | 796.5   | 398.7   | 779.4   | 778.4   | 6   |
| 13  | 1,499.7 | 750.3   |         | 1,481.7 | I  | 649.4   |         | 632.4   | 631.4   | 5   |
| 14  | 1,628.7 | 814.9   |         | 1,610.7 | E  | 536.3   |         | 519.3   | 518.3   | 4   |
| 15  | 1,775.8 | 888.4   |         | 1,757.8 | F  | 407.3   |         | 390.2   |         | 3   |
| 16  | 1,888.9 | 944.9   |         | 1,870.9 | L  | 260.2   |         | 243.2   |         | 2   |
| 17  | 2,035.0 | 1,018.0 | 2,017.9 | 2,017.0 | K  | 147.1   |         | 130.1   |         | 1   |

# Nuclear proteome

| Protein No. | Leading protein name | Sequence           | Mascot Score | Variable Modifications | SILAC State | Charge | m/z       |
|-------------|----------------------|--------------------|--------------|------------------------|-------------|--------|-----------|
| N-61        | sp O00257 CBX4_HUMAN | GYLGAVKPLAGAAGAPGK | 59.36        | Unmodified             | Light       | 3      | 533.30687 |

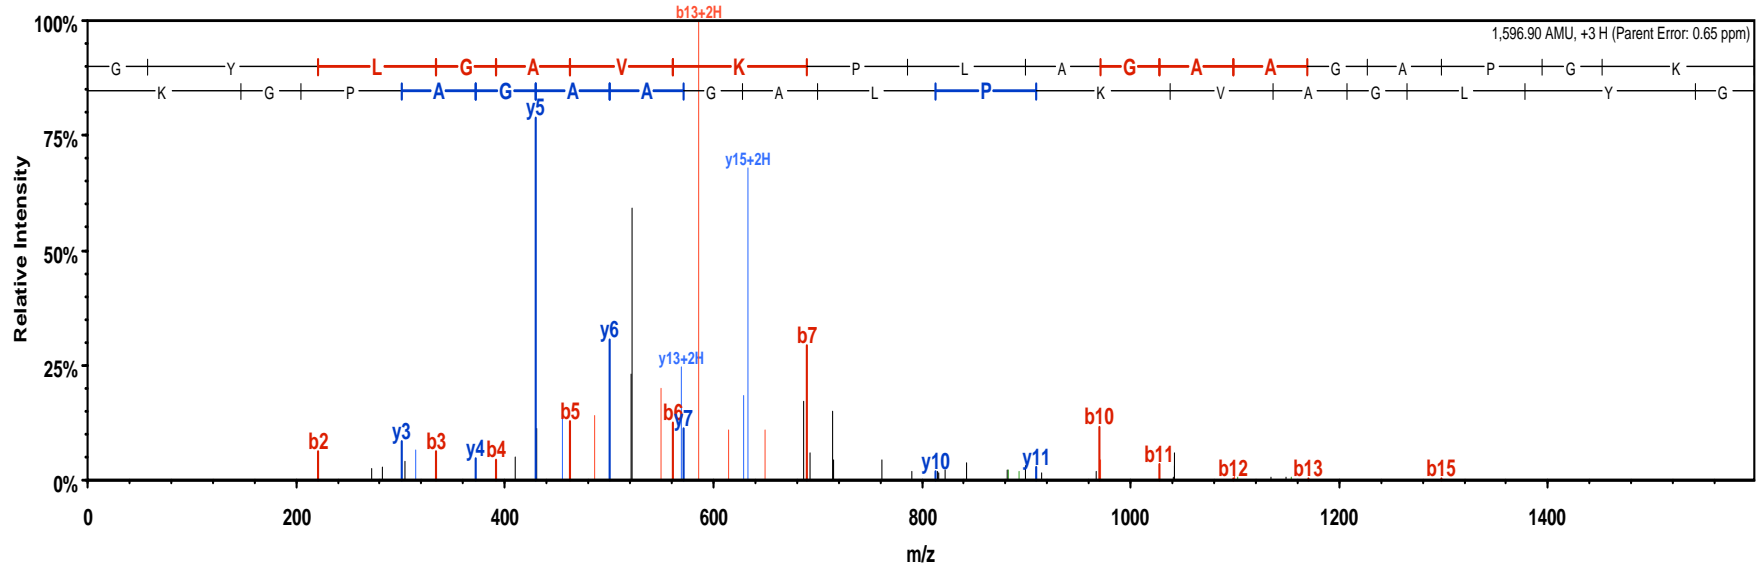

| ... | B Ions  | B+2H  | B-NH3   | B-H2O | AA | Y Ions  | Y+2H  | Y-NH3   | Y-H2O | ... |
|-----|---------|-------|---------|-------|----|---------|-------|---------|-------|-----|
| 1   | 58.0    |       |         |       | G  | 1,597.9 | 799.5 | 1,580.9 |       | 18  |
| 2   | 221.1   |       |         |       | Y  | 1,540.9 | 770.9 | 1,523.9 |       | 17  |
| 3   | 334.2   |       |         |       | L  | 1,377.8 | 689.4 | 1,360.8 |       | 16  |
| 4   | 391.2   |       |         |       | G  | 1,264.7 | 632.9 | 1,247.7 |       | 15  |
| 5   | 462.2   |       |         |       | A  | 1,207.7 | 604.4 | 1,190.7 |       | 14  |
| 6   | 561.3   | 281.2 |         |       | V  | 1,136.7 | 568.8 | 1,119.7 |       | 13  |
| 7   | 689.4   | 345.2 | 672.4   |       | K  | 1,037.6 | 519.3 | 1,020.6 |       | 12  |
| 8   | 786.5   | 393.7 | 769.4   |       | P  | 909.5   | 455.3 | 892.5   |       | 11  |
| 9   | 899.5   | 450.3 | 882.5   |       | L  | 812.5   | 406.7 | 795.4   |       | 10  |
| 10  | 970.6   | 485.8 | 953.5   |       | A  | 699.4   | 350.2 | 682.4   |       | 9   |
| 11  | 1,027.6 | 514.3 | 1,010.6 |       | G  | 628.3   | 314.7 | 611.3   |       | 8   |
| 12  | 1,098.6 | 549.8 | 1,081.6 |       | A  | 571.3   | 286.2 | 554.3   |       | 7   |
| 13  | 1,169.7 | 585.3 | 1,152.6 |       | A  | 500.3   | 250.6 | 483.3   |       | 6   |
| 14  | 1,226.7 | 613.8 | 1,209.7 |       | G  | 429.2   |       | 412.2   |       | 5   |
| 15  | 1,297.7 | 649.4 | 1,280.7 |       | A  | 372.2   |       | 355.2   |       | 4   |
| 16  | 1,394.8 | 697.9 | 1,377.8 |       | P  | 301.2   |       | 284.2   |       | 3   |
| 17  | 1,451.8 | 726.4 | 1,434.8 |       | G  | 204.1   |       | 187.1   |       | 2   |
| 18  | 1,597.9 | 799.5 | 1,580.9 |       | K  | 147.1   |       | 130.1   |       | 1   |

# Nuclear proteome

| Protein No. | Leading protein name  | Sequence    | Mascot Score | Variable Modifications   | SILAC State | Charge | m/z       |
|-------------|-----------------------|-------------|--------------|--------------------------|-------------|--------|-----------|
| N-62        | spIQ7Z7H5ITMED4_HUMAN | QLLDQVEQIQK | 59.26        | Gln->pyro-Glu (N-term Q) | Light       | 2      | 662.85899 |

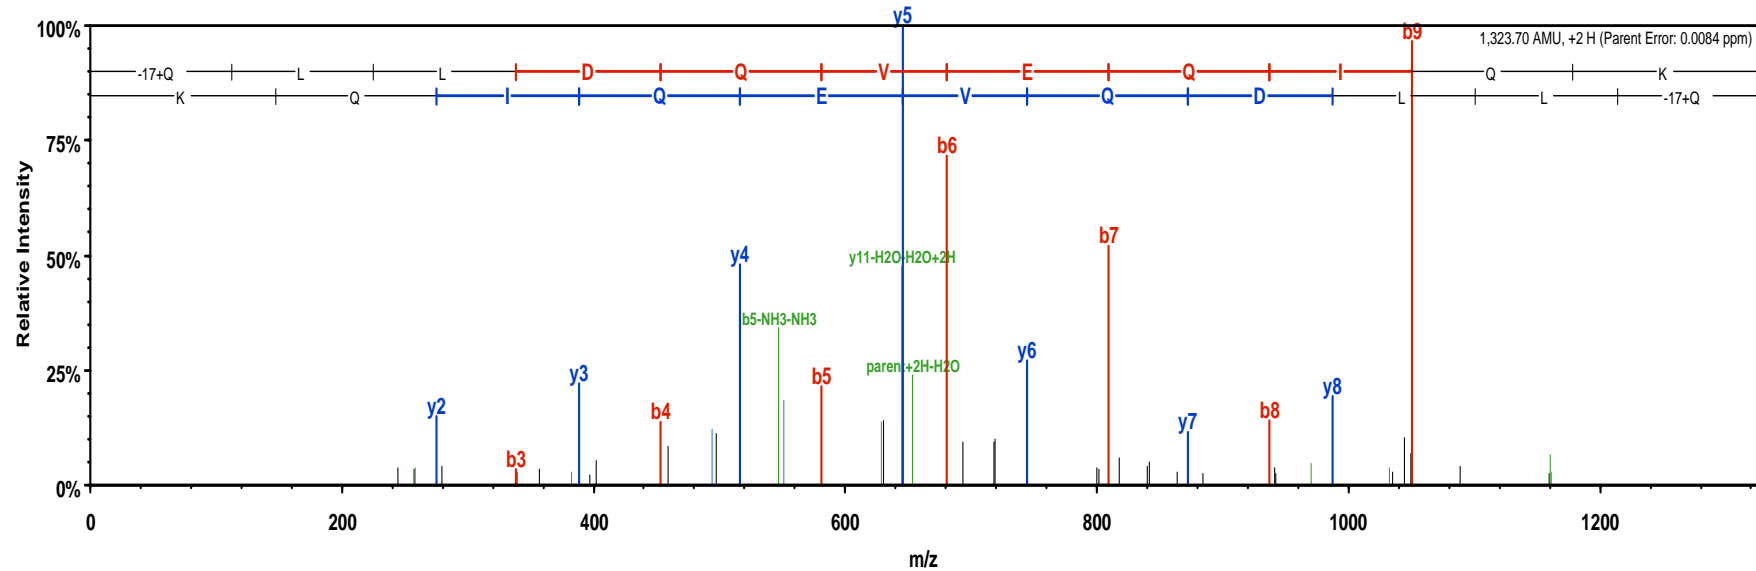

| ... | B Ions  | B+2H  | B-NH3   | B-H2O   | AA   | Y Ions  | Y+2H  | Y-NH3   | Y-H2O   | ... |
|-----|---------|-------|---------|---------|------|---------|-------|---------|---------|-----|
| 1   | 112.0   |       | 95.0    |         | Q-17 | 1,324.7 | 662.9 | 1,307.7 | 1,306.7 | 11  |
| 2   | 225.1   |       | 208.1   |         | L    | 1,213.7 | 607.3 | 1,196.7 | 1,195.7 | 10  |
| 3   | 338.2   |       | 321.2   |         | L    | 1,100.6 | 550.8 | 1,083.6 | 1,082.6 | 9   |
| 4   | 453.2   |       | 436.2   | 435.2   | D    | 987.5   | 494.3 | 970.5   | 969.5   | 8   |
| 5   | 581.3   |       | 564.3   | 563.3   | Q    | 872.5   | 436.7 | 855.5   | 854.5   | 7   |
| 6   | 680.4   | 340.7 | 663.3   | 662.4   | V    | 744.4   | 372.7 | 727.4   | 726.4   | 6   |
| 7   | 809.4   | 405.2 | 792.4   | 791.4   | E    | 645.4   |       | 628.3   | 627.3   | 5   |
| 8   | 937.5   | 469.2 | 920.4   | 919.5   | Q    | 516.3   |       | 499.3   |         | 4   |
| 9   | 1,050.5 | 525.8 | 1,033.5 | 1,032.5 | I    | 388.3   |       | 371.2   |         | 3   |
| 10  | 1,178.6 | 589.8 | 1,161.6 | 1,160.6 | Q    | 275.2   |       | 258.1   |         | 2   |
| 11  | 1,324.7 | 662.9 | 1,307.7 | 1,306.7 | K    | 147.1   |       | 130.1   |         | 1   |

# Nuclear proteome

| Protein No. | Leading protein name  | Sequence     | Mascot Score | Variable Modifications | SILAC State | Charge | m/z       |
|-------------|-----------------------|--------------|--------------|------------------------|-------------|--------|-----------|
| N-63        | sp Q15363 TMED2_HUMAN | YTFAAHMDGTYK | 58.82        | Unmodified             | Heavy       | 2      | 702.81627 |

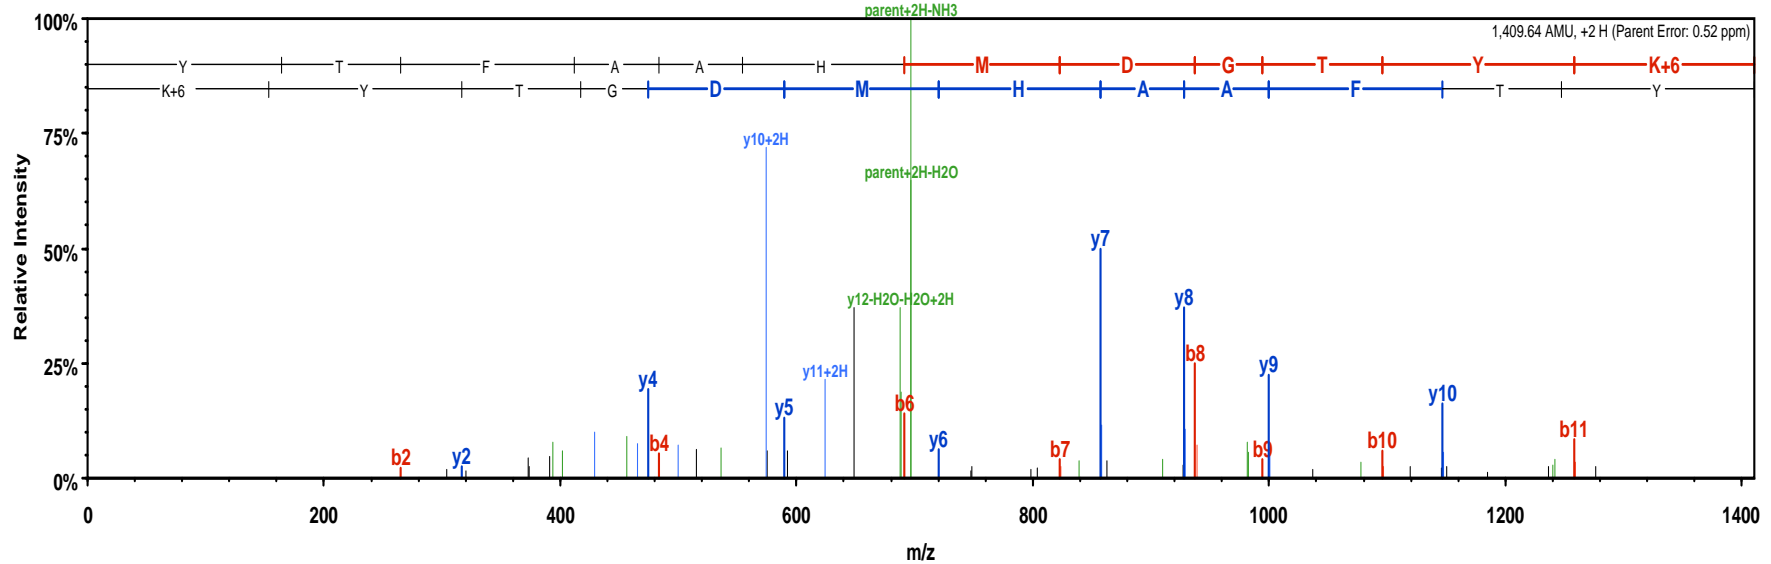

| ... | B Ions  | B+2H  | B-NH3   | B-H2O   | AA  | Y Ions  | Y+2H  | Y-NH3   | Y-H2O   | ... |
|-----|---------|-------|---------|---------|-----|---------|-------|---------|---------|-----|
| 1   | 164.1   |       |         |         | Y   | 1,410.6 | 705.8 | 1,393.6 | 1,392.6 | 12  |
| 2   | 265.1   |       |         | 247.1   | T   | 1,247.6 | 624.3 | 1,230.6 | 1,229.6 | 11  |
| 3   | 412.2   |       |         | 394.2   | F   | 1,146.5 | 573.8 | 1,129.5 | 1,128.5 | 10  |
| 4   | 483.2   |       |         | 465.2   | A   | 999.5   | 500.2 | 982.4   | 981.5   | 9   |
| 5   | 554.3   |       |         | 536.3   | A   | 928.4   | 464.7 | 911.4   | 910.4   | 8   |
| 6   | 691.3   | 346.2 |         | 673.3   | H   | 857.4   | 429.2 | 840.4   | 839.4   | 7   |
| 7   | 822.4   | 411.7 |         | 804.3   | M   | 720.3   | 360.7 | 703.3   | 702.3   | 6   |
| 8   | 937.4   | 469.2 |         | 919.4   | D   | 589.3   |       | 572.3   | 571.3   | 5   |
| 9   | 994.4   | 497.7 |         | 976.4   | G   | 474.3   |       | 457.2   | 456.3   | 4   |
| 10  | 1,095.5 | 548.2 |         | 1,077.4 | T   | 417.2   |       | 400.2   | 399.2   | 3   |
| 11  | 1,258.5 | 629.8 |         | 1,240.5 | Y   | 316.2   |       | 299.2   |         | 2   |
| 12  | 1,410.6 | 705.8 | 1,393.6 | 1,392.6 | K+6 | 153.1   |       | 136.1   |         | 1   |



# Nuclear proteome

| Protein No. | Leading protein name  | Sequence         | Mascot Score | Variable Modifications | SILAC State | Charge | m/z       |
|-------------|-----------------------|------------------|--------------|------------------------|-------------|--------|-----------|
| N-64        | sp Q969F1 TF3C6_HUMAN | EGEENIGGVVEWLQIK | 58.06        | Unmodified             | Light       | 2      | 850.92813 |

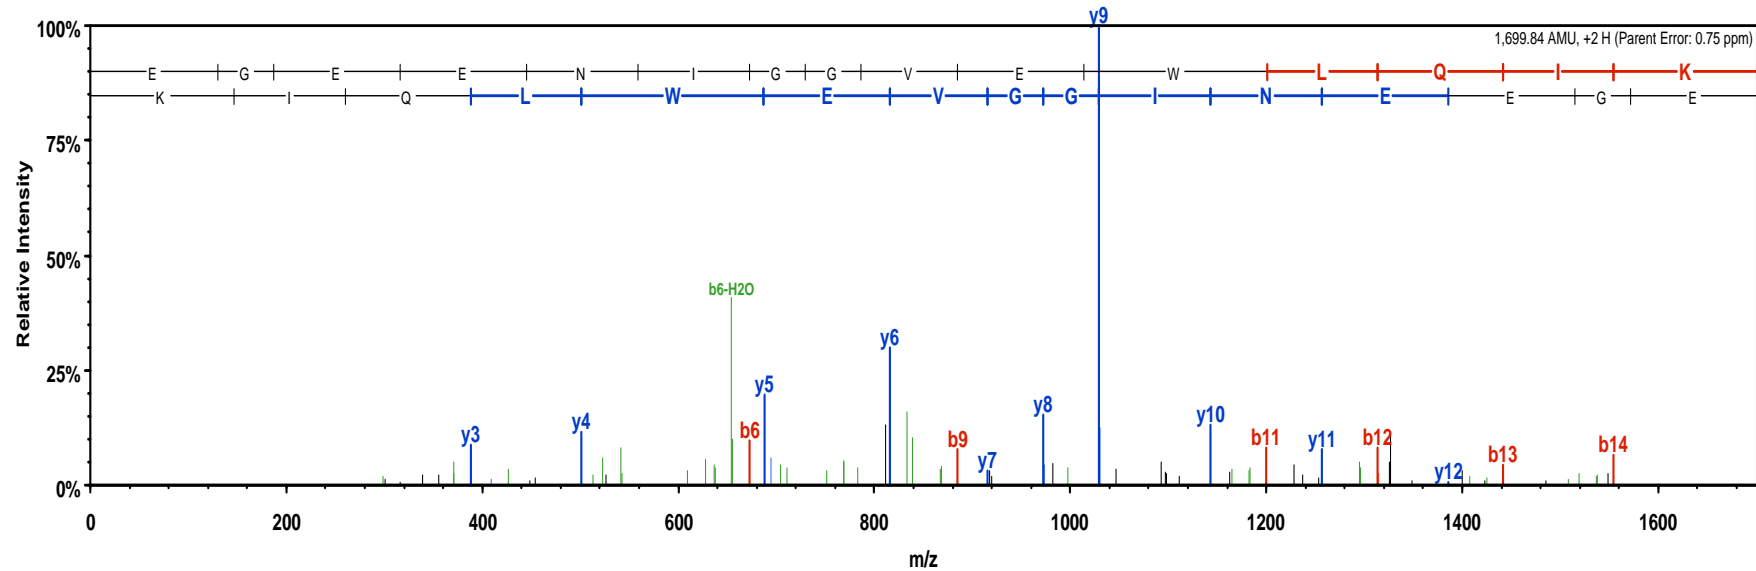

| ... | B Ions  | B+2H  | B-NH3   | B-H2O   | AA | Y Ions  | Y+2H  | Y-NH3   | Y-H2O   | ... |
|-----|---------|-------|---------|---------|----|---------|-------|---------|---------|-----|
| 1   | 130.0   |       |         | 112.0   | E  | 1,700.8 | 850.9 | 1,683.8 | 1,682.8 | 15  |
| 2   | 187.1   |       |         | 169.1   | G  | 1,571.8 | 786.4 | 1,554.8 | 1,553.8 | 14  |
| 3   | 316.1   |       |         | 298.1   | E  | 1,514.8 | 757.9 | 1,497.8 | 1,496.8 | 13  |
| 4   | 445.2   |       |         | 427.1   | E  | 1,385.7 | 693.4 | 1,368.7 | 1,367.7 | 12  |
| 5   | 559.2   |       | 542.2   | 541.2   | N  | 1,256.7 | 628.9 | 1,239.7 | 1,238.7 | 11  |
| 6   | 672.3   | 336.6 | 655.3   | 654.3   | I  | 1,142.7 | 571.8 | 1,125.6 | 1,124.6 | 10  |
| 7   | 729.3   | 365.2 | 712.3   | 711.3   | G  | 1,029.6 | 515.3 | 1,012.5 | 1,011.6 | 9   |
| 8   | 786.3   | 393.7 | 769.3   | 768.3   | G  | 972.6   | 486.8 | 955.5   | 954.5   | 8   |
| 9   | 885.4   | 443.2 | 868.4   | 867.4   | V  | 915.5   | 458.3 | 898.5   | 897.5   | 7   |
| 10  | 1,014.4 | 507.7 | 997.4   | 996.4   | E  | 816.5   | 408.7 | 799.4   | 798.5   | 6   |
| 11  | 1,200.5 | 600.8 | 1,183.5 | 1,182.5 | W  | 687.4   |       | 670.4   |         | 5   |
| 12  | 1,313.6 | 657.3 | 1,296.6 | 1,295.6 | L  | 501.3   |       | 484.3   |         | 4   |
| 13  | 1,441.7 | 721.3 | 1,424.6 | 1,423.6 | Q  | 388.3   |       | 371.2   |         | 3   |
| 14  | 1,554.7 | 777.9 | 1,537.7 | 1,536.7 | I  | 260.2   |       | 243.2   |         | 2   |
| 15  | 1,700.8 | 850.9 | 1,683.8 | 1,682.8 | K  | 147.1   |       | 130.1   |         | 1   |

# Nuclear proteome

| Protein No. | Leading protein name | Sequence          | Mascot Score | Variable Modifications | SILAC State | Charge | m/z      |
|-------------|----------------------|-------------------|--------------|------------------------|-------------|--------|----------|
| N-65        | spIP56270IMAZ_HUMAN  | LSHSDEKPYQCPVCQQR | 58           | Unmodified             | Light       | 2      | 1066.486 |

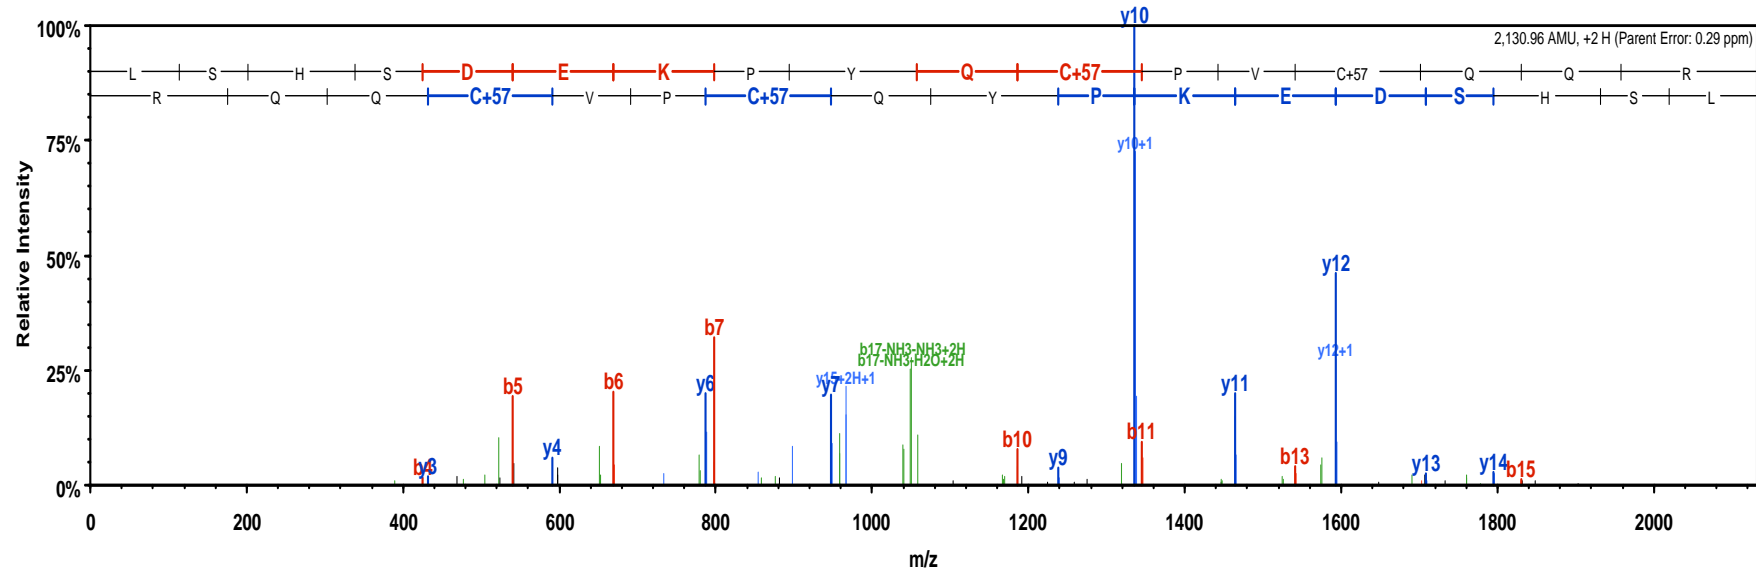

| ... | B Ions  | B+2H    | B-NH3   | B-H2O   | AA   | Y Ions  | Y+2H    | Y-NH3   | Y-H2O   | ... |
|-----|---------|---------|---------|---------|------|---------|---------|---------|---------|-----|
| 1   | 114.1   |         |         |         | L    | 2,132.0 | 1,066.5 | 2,114.9 | 2,114.0 | 17  |
| 2   | 201.1   |         |         | 183.1   | S    | 2,018.9 | 1,009.9 | 2,001.9 | 2,000.9 | 16  |
| 3   | 338.2   | 169.6   |         | 320.2   | H    | 1,931.8 | 966.4   | 1,914.8 | 1,913.8 | 15  |
| 4   | 425.2   | 213.1   |         | 407.2   | S    | 1,794.8 | 897.9   | 1,777.8 | 1,776.8 | 14  |
| 5   | 540.2   | 270.6   |         | 522.2   | D    | 1,707.8 | 854.4   | 1,690.7 | 1,689.7 | 13  |
| 6   | 669.3   | 335.1   |         | 651.3   | E    | 1,592.7 | 796.9   | 1,575.7 | 1,574.7 | 12  |
| 7   | 797.4   | 399.2   | 780.4   | 779.4   | K    | 1,463.7 | 732.3   | 1,446.7 |         | 11  |
| 8   | 894.4   | 447.7   | 877.4   | 876.4   | P    | 1,335.6 | 668.3   | 1,318.6 |         | 10  |
| 9   | 1,057.5 | 529.3   | 1,040.5 | 1,039.5 | Y    | 1,238.5 | 619.8   | 1,221.5 |         | 9   |
| 10  | 1,185.6 | 593.3   | 1,168.5 | 1,167.5 | Q    | 1,075.5 | 538.2   | 1,058.5 |         | 8   |
| 11  | 1,345.6 | 673.3   | 1,328.6 | 1,327.6 | C+57 | 947.4   | 474.2   | 930.4   |         | 7   |
| 12  | 1,442.6 | 721.8   | 1,425.6 | 1,424.6 | P    | 787.4   | 394.2   | 770.4   |         | 6   |
| 13  | 1,541.7 | 771.4   | 1,524.7 | 1,523.7 | V    | 690.3   |         | 673.3   |         | 5   |
| 14  | 1,701.7 | 851.4   | 1,684.7 | 1,683.7 | C+57 | 591.3   |         | 574.2   |         | 4   |
| 15  | 1,829.8 | 915.4   | 1,812.8 | 1,811.8 | Q    | 431.2   |         | 414.2   |         | 3   |
| 16  | 1,957.9 | 979.4   | 1,940.8 | 1,939.8 | Q    | 303.2   |         | 286.2   |         | 2   |
| 17  | 2,132.0 | 1,066.5 | 2,114.9 | 2,114.0 | R    | 175.1   |         | 158.1   |         | 1   |

# Nuclear proteome

| Protein No. | Leading protein name  | Sequence       | Mascot Score | Variable Modifications   | SILAC State | Charge | m/z       |
|-------------|-----------------------|----------------|--------------|--------------------------|-------------|--------|-----------|
| N-66        | spIP61020IRAB5B_HUMAN | QASPSIVIALAGNK | 57.67        | Gln->pyro-Glu (N-term Q) | Light       | 2      | 676.38263 |

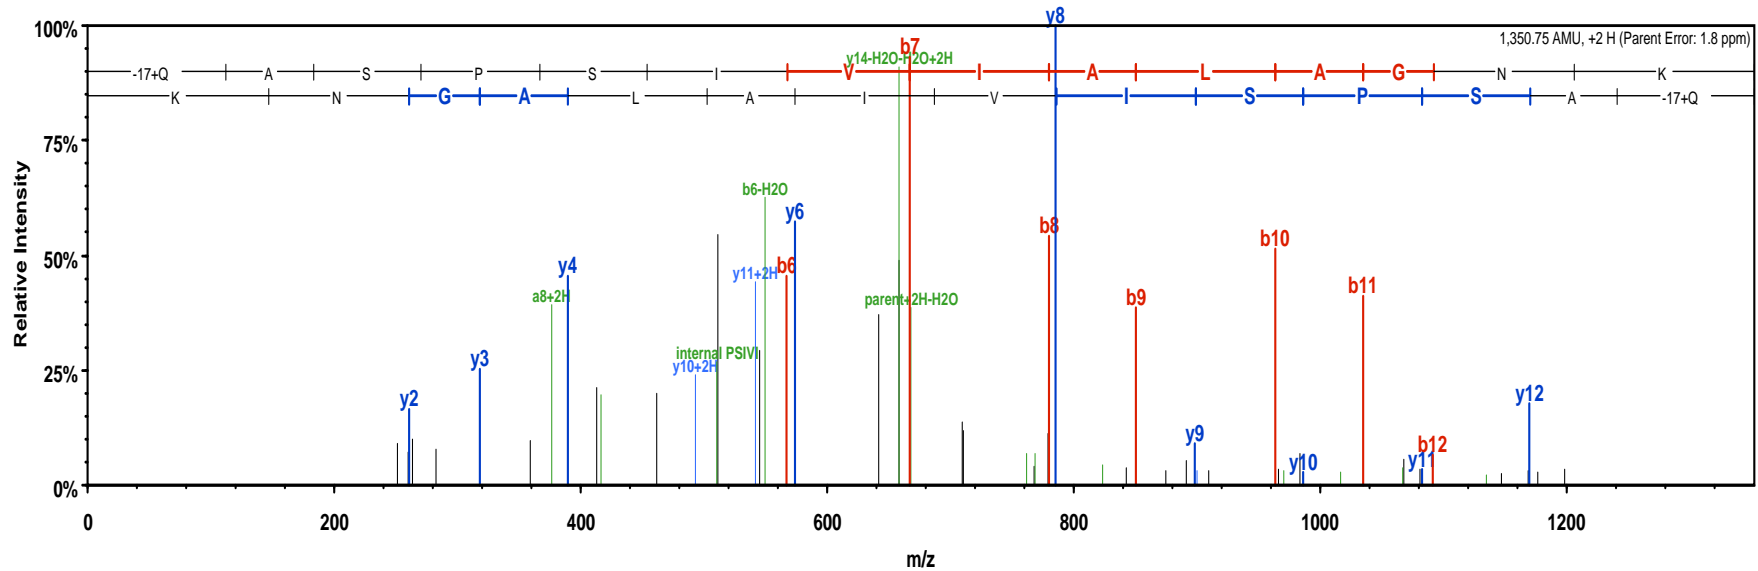

| ... | B Ions  | B+2H  | B-NH3   | B-H2O   | AA   | Y Ions  | Y+2H  | Y-NH3   | Y-H2O   | ... |
|-----|---------|-------|---------|---------|------|---------|-------|---------|---------|-----|
| 1   | 112.0   |       | 95.0    |         | Q-17 | 1,351.8 | 676.4 | 1,334.7 | 1,333.7 | 14  |
| 2   | 183.1   |       | 166.0   |         | A    | 1,240.7 | 620.9 | 1,223.7 | 1,222.7 | 13  |
| 3   | 270.1   |       | 253.1   | 252.1   | S    | 1,169.7 | 585.3 | 1,152.7 | 1,151.7 | 12  |
| 4   | 367.2   |       | 350.1   | 349.2   | P    | 1,082.7 | 541.8 | 1,065.6 | 1,064.6 | 11  |
| 5   | 454.2   |       | 437.2   | 436.2   | S    | 985.6   | 493.3 | 968.6   | 967.6   | 10  |
| 6   | 567.3   | 284.1 | 550.3   | 549.3   | I    | 898.6   | 449.8 | 881.5   |         | 9   |
| 7   | 666.3   | 333.7 | 649.3   | 648.3   | V    | 785.5   | 393.2 | 768.5   |         | 8   |
| 8   | 779.4   | 390.2 | 762.4   | 761.4   | I    | 686.4   | 343.7 | 669.4   |         | 7   |
| 9   | 850.5   | 425.7 | 833.4   | 832.5   | A    | 573.3   | 287.2 | 556.3   |         | 6   |
| 10  | 963.6   | 482.3 | 946.5   | 945.5   | L    | 502.3   |       | 485.3   |         | 5   |
| 11  | 1,034.6 | 517.8 | 1,017.6 | 1,016.6 | A    | 389.2   |       | 372.2   |         | 4   |
| 12  | 1,091.6 | 546.3 | 1,074.6 | 1,073.6 | G    | 318.2   |       | 301.2   |         | 3   |
| 13  | 1,205.7 | 603.3 | 1,188.6 | 1,187.6 | N    | 261.2   |       | 244.1   |         | 2   |
| 14  | 1,351.8 | 676.4 | 1,334.7 | 1,333.7 | K    | 147.1   |       | 130.1   |         | 1   |

# Nuclear proteome

| Protein No. | Leading protein name  | Sequence                              | Mascot Score | Variable Modifications | SILAC State | Charge | m/z       |
|-------------|-----------------------|---------------------------------------|--------------|------------------------|-------------|--------|-----------|
| N-67        | spIP53990IK0174_HUMAN | NYNVPYEPDSVVM AEAPPGVETDLIDVGF TDDVKK | 57.13        | Unmodified             | Light       | 3      | 1275.2801 |

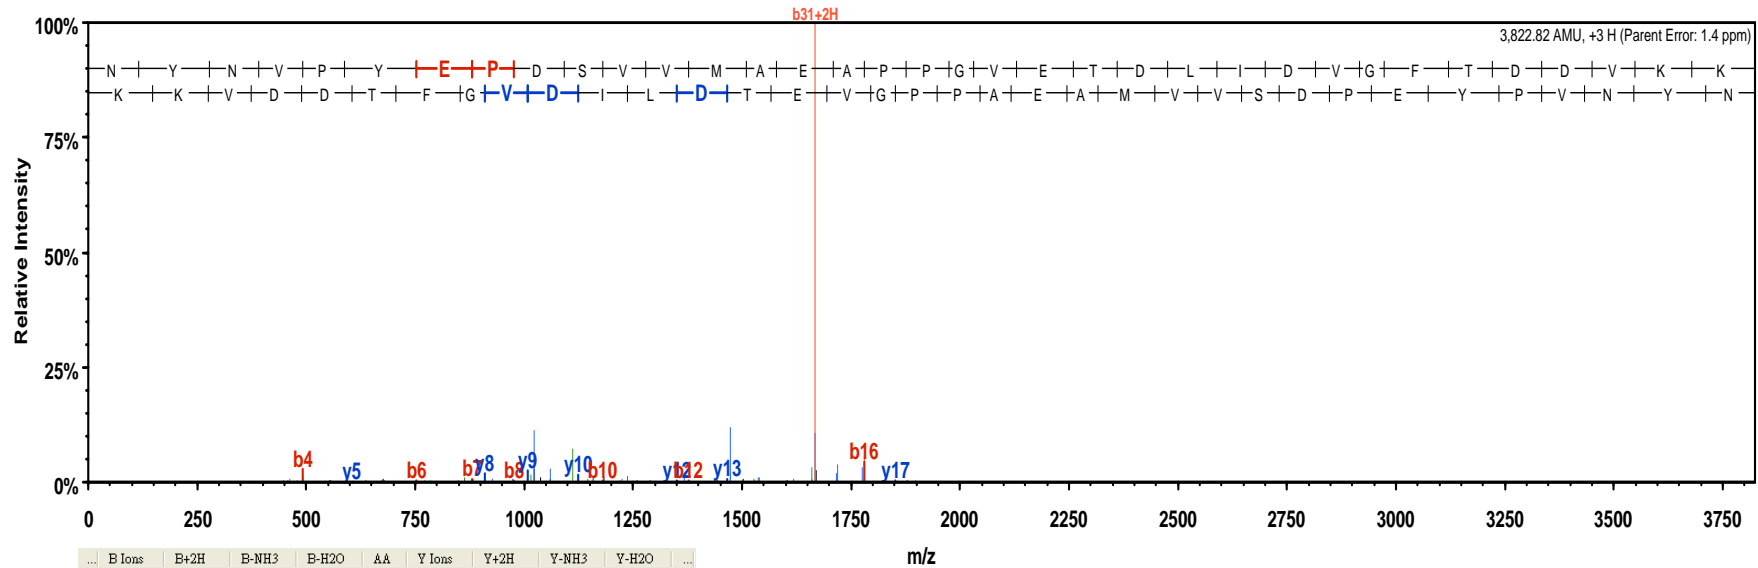

| ... | B Ions  | B+2H    | B-NH3   | B-H2O   | AA | Y Ions  | Y+2H    | Y-NH3   | Y-H2O   | ... |
|-----|---------|---------|---------|---------|----|---------|---------|---------|---------|-----|
| 1   | 115.1   |         | 98.0    |         | N  | 3,823.8 | 1,912.4 | 3,806.8 | 3,805.8 | 35  |
| 2   | 278.1   |         | 261.1   |         | Y  | 3,709.8 | 1,855.4 | 3,692.8 | 3,691.8 | 34  |
| 3   | 392.2   |         | 375.1   |         | N  | 3,546.7 | 1,773.9 | 3,529.7 | 3,528.7 | 33  |
| 4   | 491.2   |         | 474.2   |         | V  | 3,432.7 | 1,716.8 | 3,415.7 | 3,414.7 | 32  |
| 5   | 588.3   |         | 571.3   |         | P  | 3,333.6 | 1,667.3 | 3,316.6 | 3,315.6 | 31  |
| 6   | 751.3   | 376.2   | 734.3   |         | Y  | 3,236.6 | 1,618.8 | 3,219.5 | 3,218.5 | 30  |
| 7   | 880.4   | 440.7   | 863.4   | 862.4   | E  | 3,073.5 | 1,537.2 | 3,056.5 | 3,055.5 | 29  |
| 8   | 977.4   | 489.2   | 960.4   | 959.4   | P  | 2,944.5 | 1,472.7 | 2,927.4 | 2,926.4 | 28  |
| 9   | 1,092.5 | 546.7   | 1,075.4 | 1,074.5 | D  | 2,847.4 | 1,424.2 | 2,830.4 | 2,829.4 | 27  |
| 10  | 1,179.5 | 590.3   | 1,162.5 | 1,161.5 | S  | 2,732.4 | 1,366.7 | 2,715.3 | 2,714.4 | 26  |
| 11  | 1,278.6 | 639.8   | 1,261.5 | 1,260.6 | V  | 2,645.3 | 1,323.2 | 2,628.3 | 2,627.3 | 25  |
| 12  | 1,377.6 | 689.3   | 1,360.6 | 1,359.6 | V  | 2,546.3 | 1,273.6 | 2,529.2 | 2,528.3 | 24  |
| 13  | 1,508.7 | 754.8   | 1,491.6 | 1,490.7 | M  | 2,447.2 | 1,224.1 | 2,430.2 | 2,429.2 | 23  |
| 14  | 1,579.7 | 790.4   | 1,562.7 | 1,561.7 | A  | 2,316.2 | 1,158.6 | 2,299.1 | 2,298.2 | 22  |
| 15  | 1,708.8 | 854.9   | 1,691.7 | 1,690.7 | E  | 2,245.1 | 1,123.1 | 2,228.1 | 2,227.1 | 21  |
| 16  | 1,779.8 | 890.4   | 1,762.8 | 1,761.8 | A  | 2,116.1 | 1,058.5 | 2,099.1 | 2,098.1 | 20  |
| 17  | 1,876.8 | 938.9   | 1,859.8 | 1,858.8 | P  | 2,045.0 | 1,023.0 | 2,028.0 | 2,027.0 | 19  |
| 18  | 1,973.9 | 987.5   | 1,956.9 | 1,955.9 | P  | 1,948.0 | 974.5   | 1,931.0 | 1,930.0 | 18  |
| 19  | 2,030.9 | 1,016.0 | 2,013.9 | 2,012.9 | G  | 1,850.9 | 926.0   | 1,833.9 | 1,832.9 | 17  |
| 20  | 2,130.0 | 1,065.5 | 2,113.0 | 2,112.0 | V  | 1,793.9 | 897.5   | 1,776.9 | 1,775.9 | 16  |
| 21  | 2,259.0 | 1,130.0 | 2,242.0 | 2,241.0 | E  | 1,694.8 | 847.9   | 1,677.8 | 1,676.8 | 15  |
| 22  | 2,360.1 | 1,180.5 | 2,343.0 | 2,342.1 | T  | 1,565.8 | 783.4   | 1,548.8 | 1,547.8 | 14  |
| 23  | 2,475.1 | 1,238.1 | 2,458.1 | 2,457.1 | D  | 1,464.8 | 732.9   | 1,447.7 | 1,446.7 | 13  |
| 24  | 2,588.2 | 1,294.6 | 2,571.2 | 2,570.2 | L  | 1,349.7 | 675.4   | 1,332.7 | 1,331.7 | 12  |
| 25  | 2,701.3 | 1,351.1 | 2,684.2 | 2,683.3 | I  | 1,236.6 | 618.8   | 1,219.6 | 1,218.6 | 11  |
| 26  | 2,816.3 | 1,408.7 | 2,799.3 | 2,798.3 | D  | 1,123.6 | 562.3   | 1,106.5 | 1,105.6 | 10  |
| 27  | 2,915.4 | 1,458.2 | 2,898.3 | 2,897.4 | V  | 1,008.5 | 504.8   | 991.5   | 990.5   | 9   |
| 28  | 2,972.4 | 1,486.7 | 2,955.4 | 2,954.4 | G  | 909.5   | 455.2   | 892.4   | 891.5   | 8   |
| 29  | 3,119.5 | 1,560.2 | 3,102.4 | 3,101.4 | F  | 852.4   | 426.7   | 835.4   | 834.4   | 7   |
| 30  | 3,220.5 | 1,610.8 | 3,203.5 | 3,202.5 | T  | 705.4   | 353.2   | 688.4   | 687.4   | 6   |
| 31  | 3,335.5 | 1,668.3 | 3,318.5 | 3,317.5 | D  | 604.3   | 302.7   | 587.3   | 586.3   | 5   |
| 32  | 3,450.6 | 1,725.8 | 3,433.5 | 3,432.5 | D  | 489.3   | 245.2   | 472.3   | 471.3   | 4   |
| 33  | 3,549.6 | 1,775.3 | 3,532.6 | 3,531.6 | V  | 374.3   | 187.6   | 357.2   |         | 3   |
| 34  | 3,677.7 | 1,839.4 | 3,660.7 | 3,659.7 | K  | 275.2   | 138.1   | 258.2   |         | 2   |
| 35  | 3,823.8 | 1,912.4 | 3,806.8 | 3,805.8 | K  | 147.1   |         | 130.1   |         | 1   |

# Nuclear proteome

| Protein No. | Leading protein name  | Sequence                  | Mascot Score | Variable Modifications  | SILAC State | Charge | m/z      |
|-------------|-----------------------|---------------------------|--------------|-------------------------|-------------|--------|----------|
| N-68        | sp O75822 EIF3J_HUMAN | AAAAAAGDSDSWDADAFSVEDPVRK | 56.92        | Acetyl (Protein N-term) | Light       | 2      | 1318.099 |

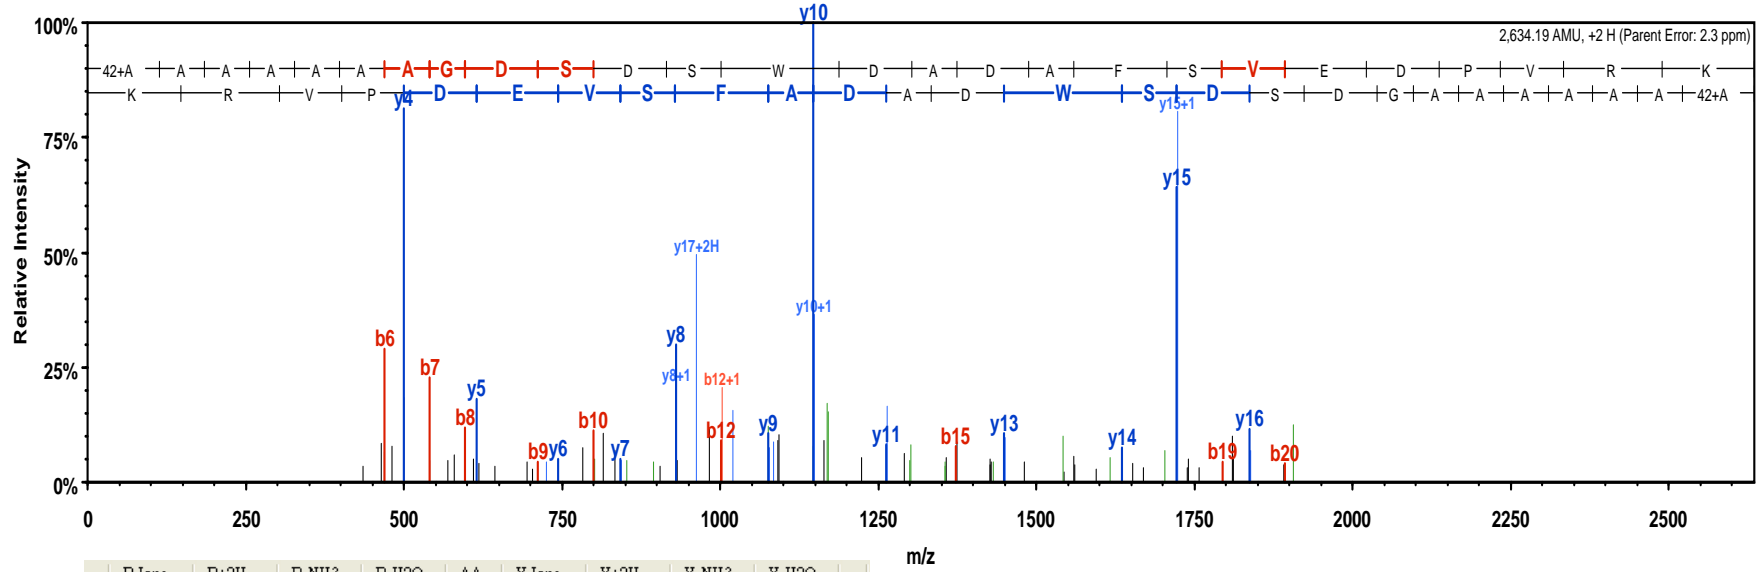

| ... | B Ions  | B+2H    | B-NH3   | B-H2O   | AA   | Y Ions  | Y+2H    | Y-NH3   | Y-H2O   | ... |
|-----|---------|---------|---------|---------|------|---------|---------|---------|---------|-----|
| 1   | 114.1   |         |         |         | A+42 | 2,635.2 | 1,318.1 | 2,618.2 | 2,617.2 | 26  |
| 2   | 185.1   |         |         |         | A    | 2,522.1 | 1,261.6 | 2,505.1 | 2,504.1 | 25  |
| 3   | 256.1   |         |         |         | A    | 2,451.1 | 1,226.1 | 2,434.1 | 2,433.1 | 24  |
| 4   | 327.2   |         |         |         | A    | 2,380.1 | 1,190.5 | 2,363.0 | 2,362.1 | 23  |
| 5   | 398.2   |         |         |         | A    | 2,309.0 | 1,155.0 | 2,292.0 | 2,291.0 | 22  |
| 6   | 469.2   | 235.1   |         |         | A    | 2,238.0 | 1,119.5 | 2,221.0 | 2,220.0 | 21  |
| 7   | 540.3   | 270.6   |         |         | A    | 2,167.0 | 1,084.0 | 2,149.9 | 2,148.9 | 20  |
| 8   | 597.3   | 299.2   |         |         | G    | 2,095.9 | 1,048.5 | 2,078.9 | 2,077.9 | 19  |
| 9   | 712.3   | 356.7   |         | 694.3   | D    | 2,038.9 | 1,020.0 | 2,021.9 | 2,020.9 | 18  |
| 10  | 799.4   | 400.2   |         | 781.3   | S    | 1,923.9 | 962.4   | 1,906.8 | 1,905.9 | 17  |
| 11  | 914.4   | 457.7   |         | 896.4   | D    | 1,836.8 | 918.9   | 1,819.8 | 1,818.8 | 16  |
| 12  | 1,001.4 | 501.2   |         | 983.4   | S    | 1,721.8 | 861.4   | 1,704.8 | 1,703.8 | 15  |
| 13  | 1,187.5 | 594.3   |         | 1,169.5 | W    | 1,634.8 | 817.9   | 1,617.8 | 1,616.8 | 14  |
| 14  | 1,302.5 | 651.8   |         | 1,284.5 | D    | 1,448.7 | 724.9   | 1,431.7 | 1,430.7 | 13  |
| 15  | 1,373.6 | 687.3   |         | 1,355.5 | A    | 1,333.7 | 667.3   | 1,316.6 | 1,315.7 | 12  |
| 16  | 1,488.6 | 744.8   |         | 1,470.6 | D    | 1,262.6 | 631.8   | 1,245.6 | 1,244.6 | 11  |
| 17  | 1,559.6 | 780.3   |         | 1,541.6 | A    | 1,147.6 | 574.3   | 1,130.6 | 1,129.6 | 10  |
| 18  | 1,706.7 | 853.9   |         | 1,688.7 | F    | 1,076.6 | 538.8   | 1,059.5 | 1,058.6 | 9   |
| 19  | 1,793.7 | 897.4   |         | 1,775.7 | S    | 929.5   | 465.3   | 912.5   | 911.5   | 8   |
| 20  | 1,892.8 | 946.9   |         | 1,874.8 | V    | 842.5   | 421.7   | 825.4   | 824.5   | 7   |
| 21  | 2,021.8 | 1,011.4 |         | 2,003.8 | E    | 743.4   | 372.2   | 726.4   | 725.4   | 6   |
| 22  | 2,136.9 | 1,068.9 |         | 2,118.9 | D    | 614.4   | 307.7   | 597.3   | 596.4   | 5   |
| 23  | 2,233.9 | 1,117.5 |         | 2,215.9 | P    | 499.3   | 250.2   | 482.3   |         | 4   |
| 24  | 2,333.0 | 1,167.0 |         | 2,315.0 | V    | 402.3   | 201.6   | 385.3   |         | 3   |
| 25  | 2,489.1 | 1,245.0 | 2,472.1 | 2,471.1 | R    | 303.2   | 152.1   | 286.2   |         | 2   |
| 26  | 2,635.2 | 1,318.1 | 2,618.2 | 2,617.2 | K    | 147.1   |         | 130.1   |         | 1   |

# Nuclear proteome

| Protein No. | Leading protein name  | Sequence         | Mascot Score | Variable Modifications   | SILAC State | Charge | m/z       |
|-------------|-----------------------|------------------|--------------|--------------------------|-------------|--------|-----------|
| N-69        | spIP56556INDUA6_HUMAN | QATSTASTFVKPIFSR | 56.84        | Gln->pyro-Glu (N-term Q) | Light       | 2      | 862.45432 |

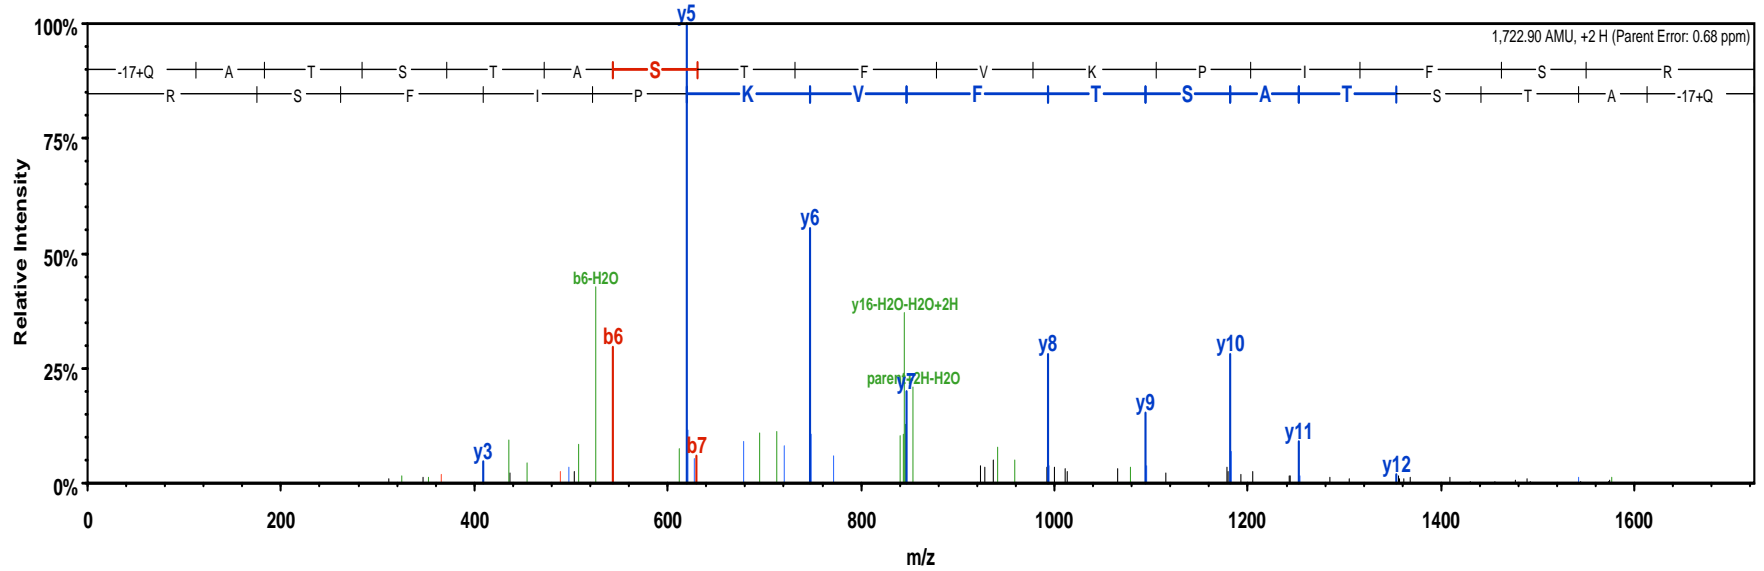

| ... | B Ions  | B+2H  | B-NH3   | B-H2O   | AA   | Y Ions  | Y+2H  | Y-MH3   | Y-H2O   | ... |
|-----|---------|-------|---------|---------|------|---------|-------|---------|---------|-----|
| 1   | 112.0   |       | 95.0    |         | Q-17 | 1,723.9 | 862.5 | 1,706.9 | 1,705.9 | 16  |
| 2   | 183.1   |       | 166.0   |         | A    | 1,612.9 | 806.9 | 1,595.8 | 1,594.9 | 15  |
| 3   | 284.1   |       | 267.1   | 266.1   | T    | 1,541.8 | 771.4 | 1,524.8 | 1,523.8 | 14  |
| 4   | 371.2   |       | 354.1   | 353.1   | S    | 1,440.8 | 720.9 | 1,423.8 | 1,422.8 | 13  |
| 5   | 472.2   |       | 455.2   | 454.2   | T    | 1,353.8 | 677.4 | 1,336.7 | 1,335.7 | 12  |
| 6   | 543.2   | 272.1 | 526.2   | 525.2   | A    | 1,252.7 | 626.9 | 1,235.7 | 1,234.7 | 11  |
| 7   | 630.3   | 315.6 | 613.2   | 612.3   | S    | 1,181.7 | 591.3 | 1,164.6 | 1,163.7 | 10  |
| 8   | 731.3   | 366.2 | 714.3   | 713.3   | T    | 1,094.6 | 547.8 | 1,077.6 | 1,076.6 | 9   |
| 9   | 878.4   | 439.7 | 861.4   | 860.4   | F    | 993.6   | 497.3 | 976.6   | 975.6   | 8   |
| 10  | 977.5   | 489.2 | 960.4   | 959.4   | V    | 846.5   | 423.8 | 829.5   | 828.5   | 7   |
| 11  | 1,105.6 | 553.3 | 1,088.5 | 1,087.5 | K    | 747.5   | 374.2 | 730.4   | 729.4   | 6   |
| 12  | 1,202.6 | 601.8 | 1,185.6 | 1,184.6 | P    | 619.4   |       | 602.3   | 601.3   | 5   |
| 13  | 1,315.7 | 658.3 | 1,298.7 | 1,297.7 | I    | 522.3   |       | 505.3   | 504.3   | 4   |
| 14  | 1,462.8 | 731.9 | 1,445.7 | 1,444.7 | F    | 409.2   |       | 392.2   | 391.2   | 3   |
| 15  | 1,549.8 | 775.4 | 1,532.8 | 1,531.8 | S    | 262.2   |       | 245.1   | 244.1   | 2   |
| 16  | 1,723.9 | 862.5 | 1,706.9 | 1,705.9 | R    | 175.1   |       | 158.1   |         | 1   |

# Nuclear proteome

| Protein No. | Leading protein name  | Sequence                       | Mascot Score | Variable Modifications | SILAC State | Charge | m/z      |
|-------------|-----------------------|--------------------------------|--------------|------------------------|-------------|--------|----------|
| N-70        | sp Q01581 HMCS1_HUMAN | DVGIVALEIYFPSQYVDQAELEKYDGVDAK | 56.18        | Unmodified             | Light       | 3      | 1144.568 |

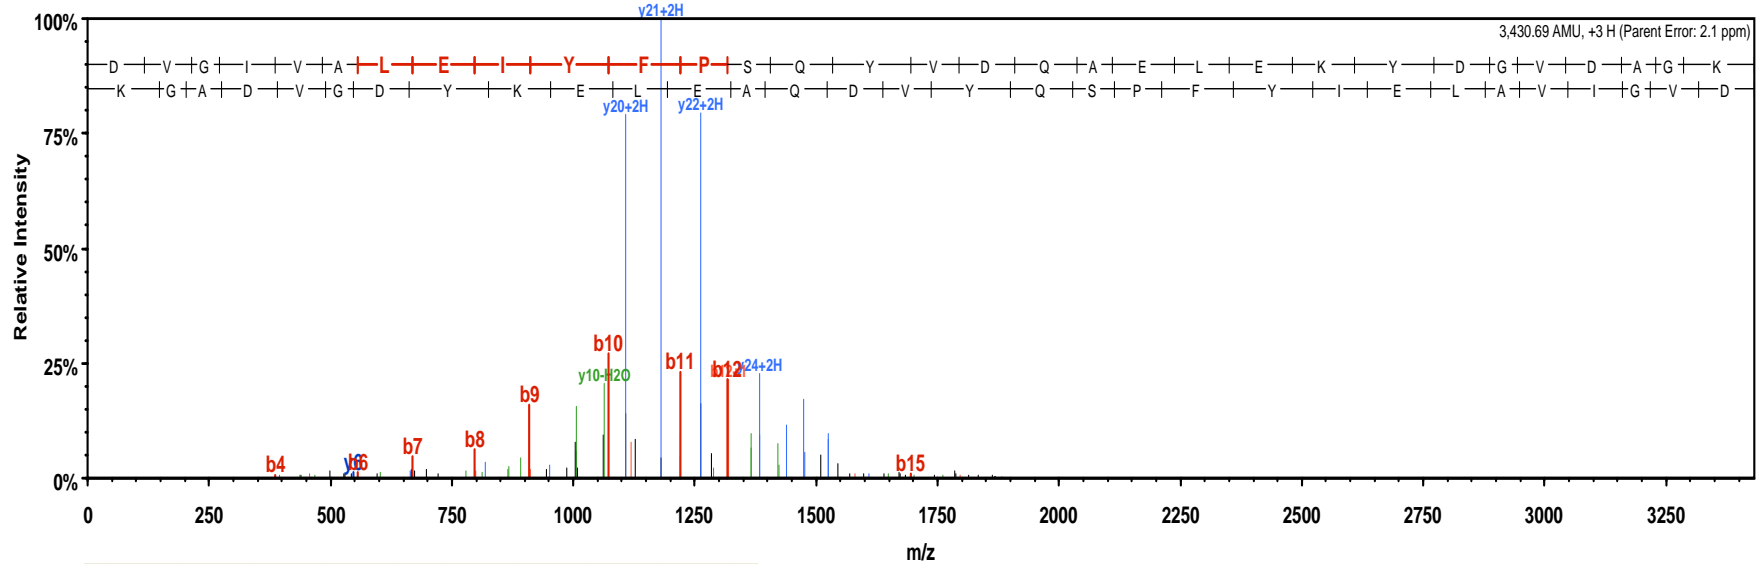

| ... | B Ions  | E+2H    | B-NH3   | B-H2O   | AA | Y Ions  | Y+2H    | Y-NH3   | Y-H2O   | ... |
|-----|---------|---------|---------|---------|----|---------|---------|---------|---------|-----|
| 1   | 116.0   |         |         | 98.0    | D  | 3,431.7 | 1,716.3 | 3,414.7 | 3,413.7 | 31  |
| 2   | 215.1   |         |         | 197.1   | V  | 3,316.7 | 1,658.8 | 3,299.6 | 3,298.7 | 30  |
| 3   | 272.1   |         |         | 254.1   | G  | 3,217.6 | 1,609.3 | 3,200.6 | 3,199.6 | 29  |
| 4   | 385.2   |         |         | 367.2   | I  | 3,160.6 | 1,580.8 | 3,143.5 | 3,142.6 | 28  |
| 5   | 484.3   |         |         | 466.3   | V  | 3,047.5 | 1,524.2 | 3,030.5 | 3,029.5 | 27  |
| 6   | 555.3   | 278.2   |         | 537.3   | A  | 2,948.4 | 1,474.7 | 2,931.4 | 2,930.4 | 26  |
| 7   | 668.4   | 334.7   |         | 650.4   | L  | 2,877.4 | 1,439.2 | 2,860.4 | 2,859.4 | 25  |
| 8   | 797.4   | 399.2   |         | 779.4   | E  | 2,764.3 | 1,382.7 | 2,747.3 | 2,746.3 | 24  |
| 9   | 910.5   | 455.8   |         | 892.5   | I  | 2,635.3 | 1,318.1 | 2,618.2 | 2,617.2 | 23  |
| 10  | 1,073.6 | 537.3   |         | 1,055.6 | Y  | 2,522.2 | 1,261.6 | 2,505.1 | 2,504.2 | 22  |
| 11  | 1,220.7 | 610.8   |         | 1,202.6 | F  | 2,359.1 | 1,180.1 | 2,342.1 | 2,341.1 | 21  |
| 12  | 1,317.7 | 659.4   |         | 1,299.7 | P  | 2,212.0 | 1,106.5 | 2,195.0 | 2,194.0 | 20  |
| 13  | 1,404.7 | 702.9   |         | 1,386.7 | S  | 2,115.0 | 1,058.0 | 2,098.0 | 2,097.0 | 19  |
| 14  | 1,532.8 | 766.9   | 1,515.8 | 1,514.8 | Q  | 2,028.0 | 1,014.5 | 2,010.9 | 2,009.9 | 18  |
| 15  | 1,695.9 | 848.4   | 1,678.8 | 1,677.9 | Y  | 1,899.9 | 950.5   | 1,882.9 | 1,881.9 | 17  |
| 16  | 1,794.9 | 898.0   | 1,777.9 | 1,776.9 | V  | 1,736.8 | 868.9   | 1,719.8 | 1,718.8 | 16  |
| 17  | 1,910.0 | 955.5   | 1,892.9 | 1,891.9 | D  | 1,637.8 | 819.4   | 1,620.7 | 1,619.8 | 15  |
| 18  | 2,038.0 | 1,019.5 | 2,021.0 | 2,020.0 | Q  | 1,522.7 | 761.9   | 1,505.7 | 1,504.7 | 14  |
| 19  | 2,109.1 | 1,055.0 | 2,092.0 | 2,091.0 | A  | 1,394.7 | 697.8   | 1,377.7 | 1,376.7 | 13  |
| 20  | 2,238.1 | 1,119.6 | 2,221.1 | 2,220.1 | E  | 1,323.6 | 662.3   | 1,306.6 | 1,305.6 | 12  |
| 21  | 2,351.2 | 1,176.1 | 2,334.2 | 2,333.2 | L  | 1,194.6 | 597.8   | 1,177.6 | 1,176.6 | 11  |
| 22  | 2,480.2 | 1,240.6 | 2,463.2 | 2,462.2 | E  | 1,081.5 | 541.3   | 1,064.5 | 1,063.5 | 10  |
| 23  | 2,608.3 | 1,304.7 | 2,591.3 | 2,590.3 | K  | 952.5   | 476.7   | 935.4   | 934.5   | 9   |
| 24  | 2,771.4 | 1,386.2 | 2,754.4 | 2,753.4 | Y  | 824.4   | 412.7   | 807.4   | 806.4   | 8   |
| 25  | 2,886.4 | 1,443.7 | 2,869.4 | 2,868.4 | D  | 661.3   | 331.2   | 644.3   | 643.3   | 7   |
| 26  | 2,943.4 | 1,472.2 | 2,926.4 | 2,925.4 | G  | 546.3   | 273.6   | 529.3   | 528.3   | 6   |
| 27  | 3,042.5 | 1,521.8 | 3,025.5 | 3,024.5 | V  | 489.3   |         | 472.2   | 471.3   | 5   |
| 28  | 3,157.5 | 1,579.3 | 3,140.5 | 3,139.5 | D  | 390.2   |         | 373.2   | 372.2   | 4   |
| 29  | 3,228.6 | 1,614.8 | 3,211.5 | 3,210.6 | A  | 275.2   |         | 258.1   |         | 3   |
| 30  | 3,285.6 | 1,643.3 | 3,268.6 | 3,267.6 | G  | 204.1   |         | 187.1   |         | 2   |
| 31  | 3,431.7 | 1,716.3 | 3,414.7 | 3,413.7 | K  | 147.1   |         | 130.1   |         | 1   |

# Nuclear proteome

| Protein No. | Leading protein name  | Sequence       | Mascot Score | Variable Modifications  | SILAC State | Charge | m/z       |
|-------------|-----------------------|----------------|--------------|-------------------------|-------------|--------|-----------|
| N-71        | sp P63313 TYB10_HUMAN | ADKPDMGEIASFDK | 55.89        | Acetyl (Protein N-term) | Heavy       | 2      | 783.36124 |

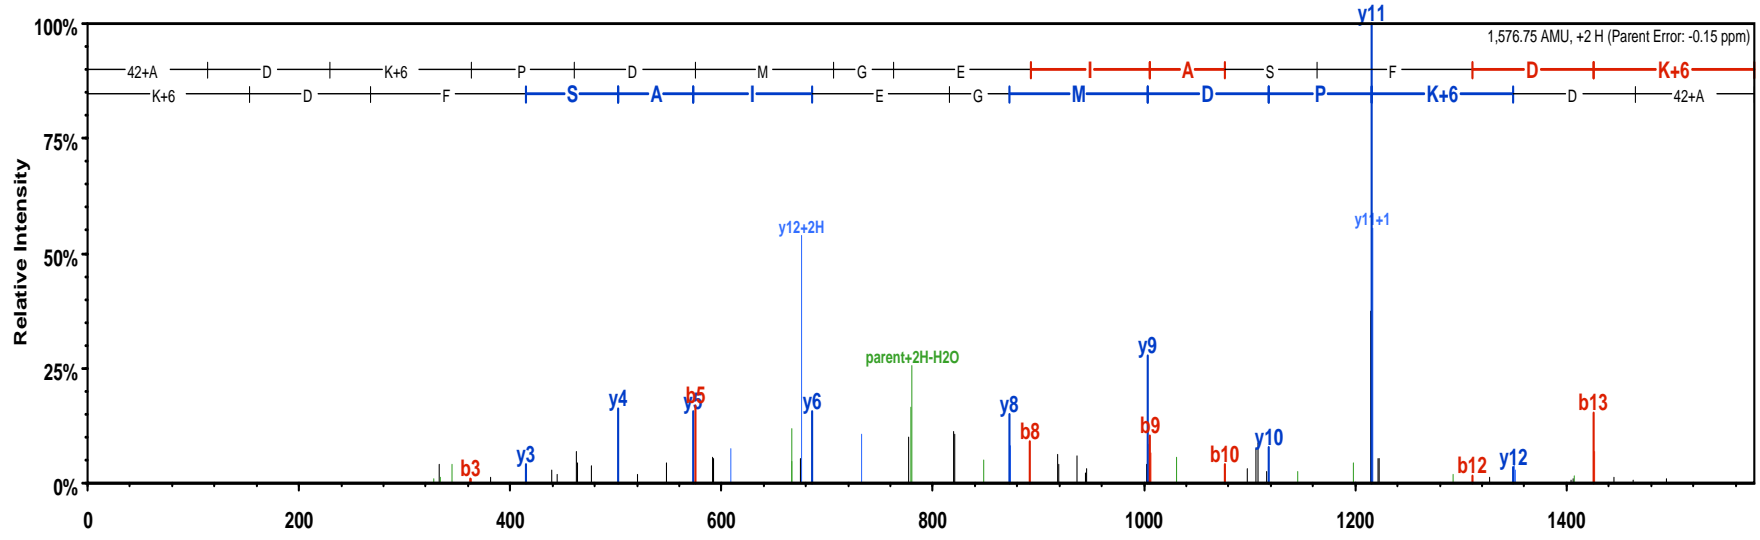

| ... | B Ions  | B+2H  | B-NH3   | B-H2O   | AA   | Y Ions  | Y+2H  | Y-NH3   | Y-H2O   | ... |
|-----|---------|-------|---------|---------|------|---------|-------|---------|---------|-----|
| 1   | 114.1   |       |         |         | A+42 | 1,577.8 | 789.4 | 1,560.7 | 1,559.7 | 14  |
| 2   | 229.1   |       |         | 211.1   | D    | 1,464.7 | 732.9 | 1,447.7 | 1,446.7 | 13  |
| 3   | 363.2   | 182.1 | 346.2   | 345.2   | K+6  | 1,349.7 | 675.3 | 1,332.7 | 1,331.7 | 12  |
| 4   | 460.2   | 230.6 | 443.2   | 442.2   | P    | 1,215.6 | 608.3 | 1,198.5 | 1,197.6 | 11  |
| 5   | 575.3   | 288.1 | 558.3   | 557.3   | D    | 1,118.5 | 559.8 | 1,101.5 | 1,100.5 | 10  |
| 6   | 706.3   | 353.7 | 689.3   | 688.3   | M    | 1,003.5 | 502.2 | 986.5   | 985.5   | 9   |
| 7   | 763.3   | 382.2 | 746.3   | 745.3   | G    | 872.4   | 436.7 | 855.4   | 854.4   | 8   |
| 8   | 892.4   | 446.7 | 875.4   | 874.4   | E    | 815.4   | 408.2 | 798.4   | 797.4   | 7   |
| 9   | 1,005.5 | 503.2 | 988.4   | 987.5   | I    | 686.4   | 343.7 | 669.4   | 668.4   | 6   |
| 10  | 1,076.5 | 538.8 | 1,059.5 | 1,058.5 | A    | 573.3   |       | 556.3   | 555.3   | 5   |
| 11  | 1,163.5 | 582.3 | 1,146.5 | 1,145.5 | S    | 502.3   |       | 485.2   | 484.2   | 4   |
| 12  | 1,310.6 | 655.8 | 1,293.6 | 1,292.6 | F    | 415.2   |       | 398.2   | 397.2   | 3   |
| 13  | 1,425.6 | 713.3 | 1,408.6 | 1,407.6 | D    | 268.2   |       | 251.1   | 250.1   | 2   |
| 14  | 1,577.8 | 789.4 | 1,560.7 | 1,559.7 | K+6  | 153.1   |       | 136.1   |         | 1   |



# Nuclear proteome

| Protein No. | Leading protein name  | Sequence           | Mascot Score | Variable Modifications | SILAC State | Charge | m/z    |
|-------------|-----------------------|--------------------|--------------|------------------------|-------------|--------|--------|
| N-72        | sp Q9NVA1 IUQCC_HUMAN | NPQSILKPHSPTYNDEGL | 55.83        | Unmodified             | Light       | 2      | 1005.5 |

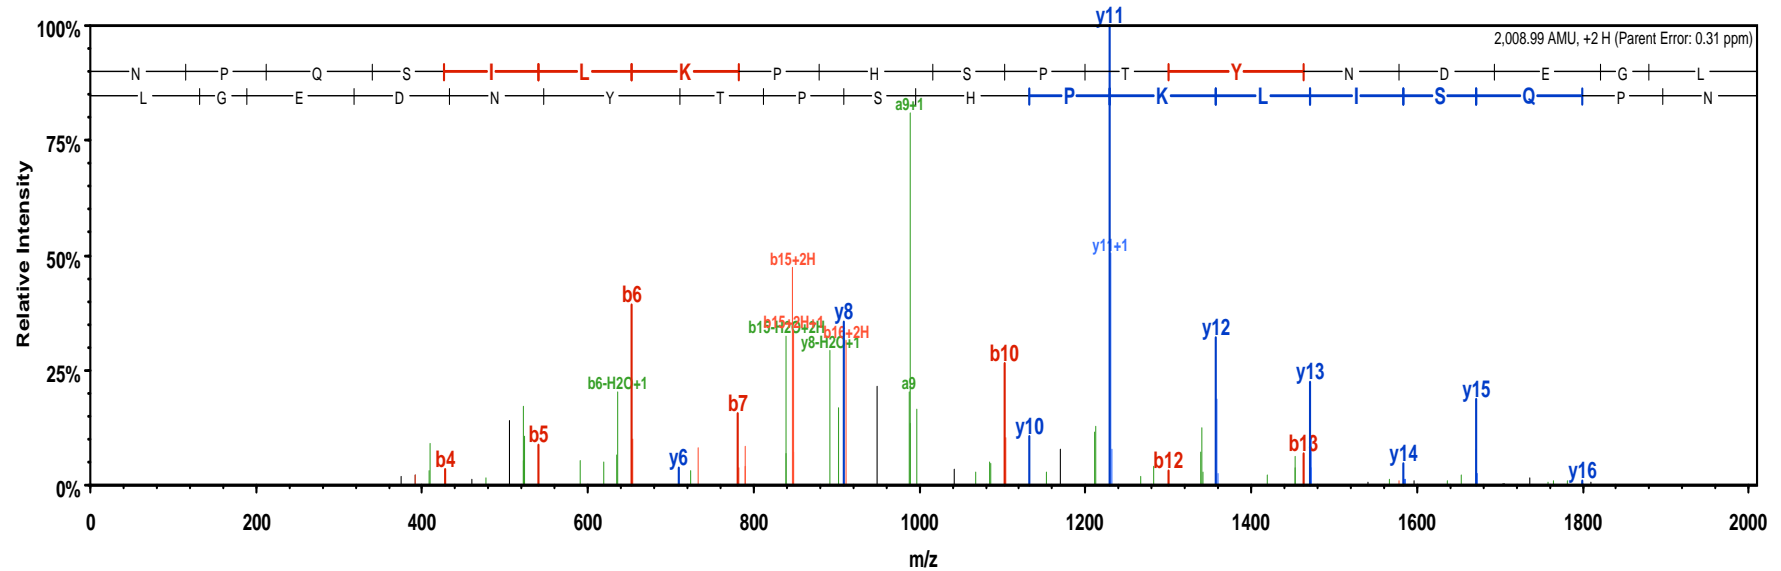

| ... | B Ions  | B+2H    | B-NH3   | B-H2O   | AA | Y Ions  | Y+2H    | Y-MH3   | Y-H2O   | ... |
|-----|---------|---------|---------|---------|----|---------|---------|---------|---------|-----|
| 1   | 115.1   |         | 98.0    |         | N  | 2,010.0 | 1,005.5 | 1,993.0 | 1,992.0 | 18  |
| 2   | 212.1   |         | 195.1   |         | P  | 1,896.0 | 948.5   | 1,878.9 | 1,877.9 | 17  |
| 3   | 340.2   |         | 323.1   |         | Q  | 1,798.9 | 900.0   | 1,781.9 | 1,780.9 | 16  |
| 4   | 427.2   |         | 410.2   | 409.2   | S  | 1,670.8 | 835.9   | 1,653.8 | 1,652.8 | 15  |
| 5   | 540.3   |         | 523.3   | 522.3   | I  | 1,583.8 | 792.4   | 1,566.8 | 1,565.8 | 14  |
| 6   | 653.4   | 327.2   | 636.3   | 635.4   | L  | 1,470.7 | 735.9   | 1,453.7 | 1,452.7 | 13  |
| 7   | 781.5   | 391.2   | 764.4   | 763.4   | K  | 1,357.6 | 679.3   | 1,340.6 | 1,339.6 | 12  |
| 8   | 878.5   | 439.8   | 861.5   | 860.5   | P  | 1,229.5 | 615.3   | 1,212.5 | 1,211.5 | 11  |
| 9   | 1,015.6 | 508.3   | 998.5   | 997.6   | H  | 1,132.5 | 566.7   | 1,115.5 | 1,114.5 | 10  |
| 10  | 1,102.6 | 551.8   | 1,085.6 | 1,084.6 | S  | 995.4   |         | 978.4   | 977.4   | 9   |
| 11  | 1,199.7 | 600.3   | 1,182.6 | 1,181.6 | P  | 908.4   |         | 891.4   | 890.4   | 8   |
| 12  | 1,300.7 | 650.9   | 1,283.7 | 1,282.7 | T  | 811.3   |         | 794.3   | 793.3   | 7   |
| 13  | 1,463.8 | 732.4   | 1,446.7 | 1,445.8 | Y  | 710.3   |         | 693.3   | 692.3   | 6   |
| 14  | 1,577.8 | 789.4   | 1,560.8 | 1,559.8 | N  | 547.2   |         | 530.2   | 529.2   | 5   |
| 15  | 1,692.8 | 846.9   | 1,675.8 | 1,674.8 | D  | 433.2   |         |         | 415.2   | 4   |
| 16  | 1,821.9 | 911.4   | 1,804.9 | 1,803.9 | E  | 318.2   |         |         | 300.2   | 3   |
| 17  | 1,878.9 | 940.0   | 1,861.9 | 1,860.9 | G  | 189.1   |         |         |         | 2   |
| 18  | 2,010.0 | 1,005.5 | 1,993.0 | 1,992.0 | L  | 132.1   |         |         |         | 1   |

# Nuclear proteome

| Protein No. | Leading protein name  | Sequence        | Mascot Score | Variable Modifications | SILAC State | Charge | m/z       |
|-------------|-----------------------|-----------------|--------------|------------------------|-------------|--------|-----------|
| N-73        | sp Q9BVG4 CX026_HUMAN | IDVLDPEELKSESAK | 55.57        | Unmodified             | Light       | 2      | 836.93562 |

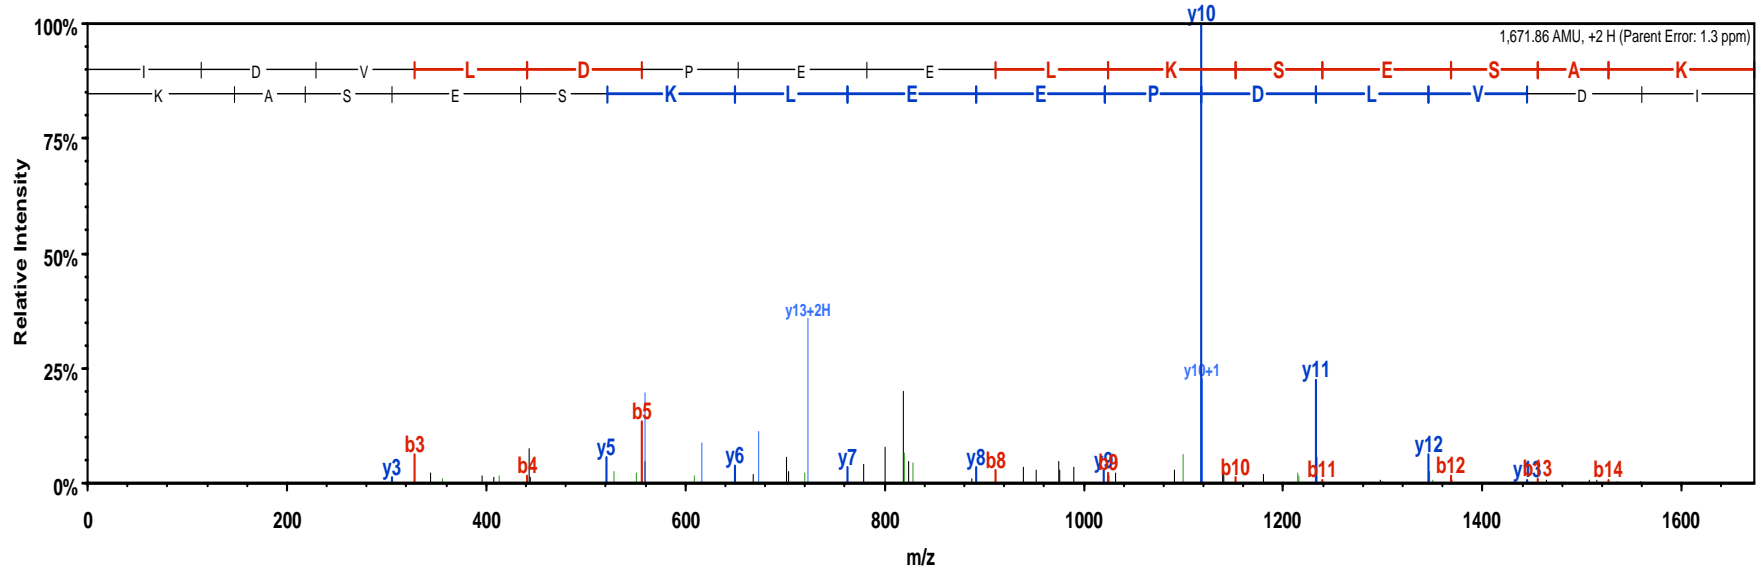

| ... | B Ions  | B+2H  | B-NH3   | B-H2O   | AA | Y Ions  | Y+2H  | Y-MH3   | Y-H2O   | ... |
|-----|---------|-------|---------|---------|----|---------|-------|---------|---------|-----|
| 1   | 114.1   |       |         |         | I  | 1,672.9 | 836.9 | 1,655.8 | 1,654.9 | 15  |
| 2   | 229.1   |       |         | 211.1   | D  | 1,559.8 | 780.4 | 1,542.8 | 1,541.8 | 14  |
| 3   | 328.2   |       |         | 310.2   | V  | 1,444.8 | 722.9 | 1,427.7 | 1,426.7 | 13  |
| 4   | 441.3   |       |         | 423.3   | L  | 1,345.7 | 673.3 | 1,328.7 | 1,327.7 | 12  |
| 5   | 556.3   |       |         | 538.3   | D  | 1,232.6 | 616.8 | 1,215.6 | 1,214.6 | 11  |
| 6   | 653.4   | 327.2 |         | 635.3   | P  | 1,117.6 | 559.3 | 1,100.5 | 1,099.6 | 10  |
| 7   | 782.4   | 391.7 |         | 764.4   | E  | 1,020.5 | 510.8 | 1,003.5 | 1,002.5 | 9   |
| 8   | 911.4   | 456.2 |         | 893.4   | E  | 891.5   | 446.2 | 874.5   | 873.5   | 8   |
| 9   | 1,024.5 | 512.8 |         | 1,006.5 | L  | 762.4   | 381.7 | 745.4   | 744.4   | 7   |
| 10  | 1,152.6 | 576.8 | 1,135.6 | 1,134.6 | K  | 649.4   | 325.2 | 632.3   | 631.3   | 6   |
| 11  | 1,239.6 | 620.3 | 1,222.6 | 1,221.6 | S  | 521.3   |       | 504.2   | 503.2   | 5   |
| 12  | 1,368.7 | 684.8 | 1,351.7 | 1,350.7 | E  | 434.2   |       | 417.2   | 416.2   | 4   |
| 13  | 1,455.7 | 728.4 | 1,438.7 | 1,437.7 | S  | 305.2   |       | 288.2   | 287.2   | 3   |
| 14  | 1,526.8 | 763.9 | 1,509.7 | 1,508.7 | A  | 218.1   |       | 201.1   |         | 2   |
| 15  | 1,672.9 | 836.9 | 1,655.8 | 1,654.9 | K  | 147.1   |       | 130.1   |         | 1   |

# Nuclear proteome

| Protein No. | Leading protein name | Sequence          | Mascot Score | Variable Modifications | SILAC State | Charge | m/z       |
|-------------|----------------------|-------------------|--------------|------------------------|-------------|--------|-----------|
| N-74        | sp P00749 UOK_HUMAN  | DYSADTLAHHNDIALLK | 54.07        | Unmodified             | Heavy       | 2      | 948.97615 |

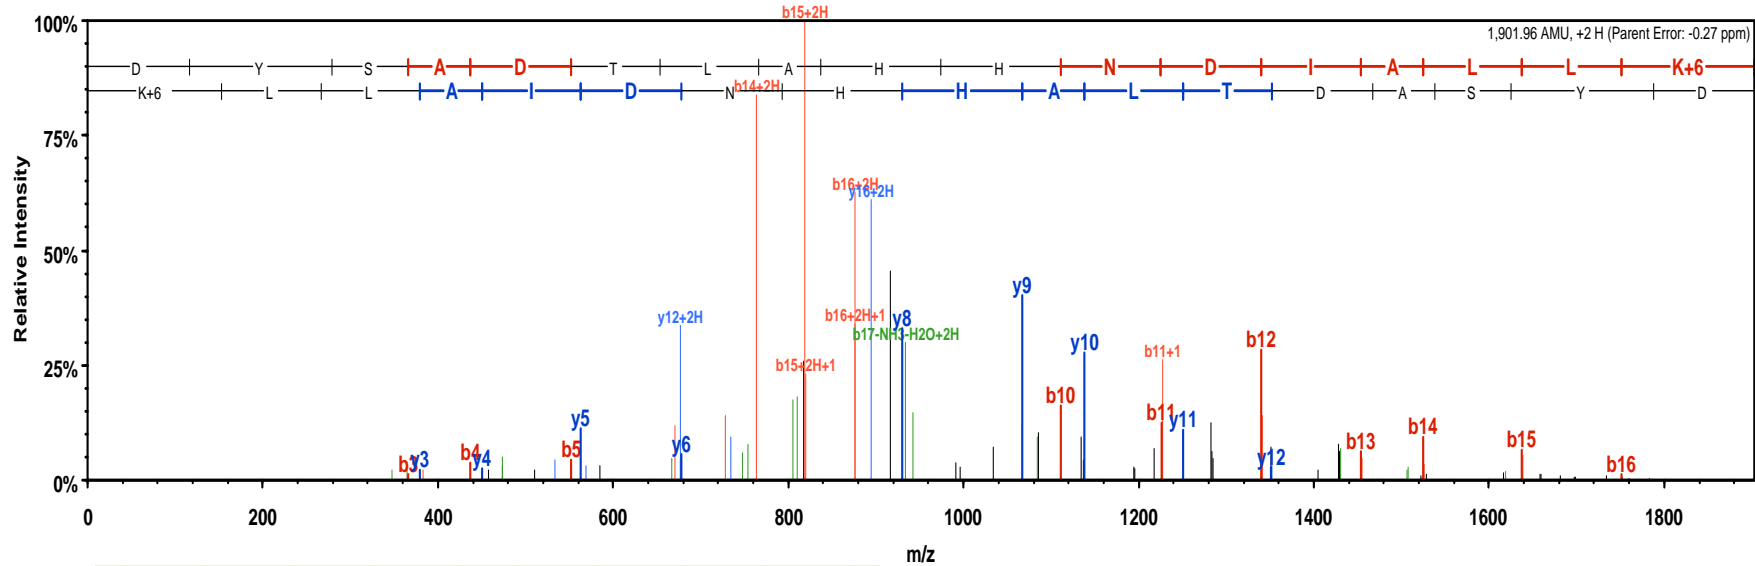

| ... | B Ions  | B+2H  | B-NH3   | B-H2O   | AA  | Y Ions  | Y+2H  | Y-NH3   | Y-H2O   | ... |
|-----|---------|-------|---------|---------|-----|---------|-------|---------|---------|-----|
| 1   | 116.0   |       |         | 98.0    | D   | 1,903.0 | 952.0 | 1,885.9 | 1,885.0 | 17  |
| 2   | 279.1   |       |         | 261.1   | Y   | 1,787.9 | 894.5 | 1,770.9 | 1,769.9 | 16  |
| 3   | 366.1   |       |         | 348.1   | S   | 1,624.9 | 812.9 | 1,607.8 | 1,606.9 | 15  |
| 4   | 437.2   |       |         | 419.2   | A   | 1,537.8 | 769.4 | 1,520.8 | 1,519.8 | 14  |
| 5   | 552.2   |       |         | 534.2   | D   | 1,466.8 | 733.9 | 1,449.8 | 1,448.8 | 13  |
| 6   | 653.2   | 327.1 |         | 635.2   | T   | 1,351.8 | 676.4 | 1,334.8 | 1,333.8 | 12  |
| 7   | 766.3   | 383.7 |         | 748.3   | L   | 1,250.7 | 625.9 | 1,233.7 | 1,232.7 | 11  |
| 8   | 837.4   | 419.2 |         | 819.4   | A   | 1,137.6 | 569.3 | 1,120.6 | 1,119.6 | 10  |
| 9   | 974.4   | 487.7 |         | 956.4   | H   | 1,066.6 | 533.8 | 1,049.6 | 1,048.6 | 9   |
| 10  | 1,111.5 | 556.2 |         | 1,093.5 | H   | 929.6   | 465.3 | 912.5   | 911.5   | 8   |
| 11  | 1,225.5 | 613.3 | 1,208.5 | 1,207.5 | N   | 792.5   | 396.7 | 775.5   | 774.5   | 7   |
| 12  | 1,340.6 | 670.8 | 1,323.5 | 1,322.5 | D   | 678.4   | 339.7 | 661.4   | 660.4   | 6   |
| 13  | 1,453.6 | 727.3 | 1,436.6 | 1,435.6 | I   | 563.4   |       | 546.4   |         | 5   |
| 14  | 1,524.7 | 762.8 | 1,507.6 | 1,506.7 | A   | 450.3   |       | 433.3   |         | 4   |
| 15  | 1,637.8 | 819.4 | 1,620.7 | 1,619.7 | L   | 379.3   |       | 362.3   |         | 3   |
| 16  | 1,750.8 | 875.9 | 1,733.8 | 1,732.8 | L   | 266.2   |       | 249.2   |         | 2   |
| 17  | 1,903.0 | 952.0 | 1,885.9 | 1,885.0 | K+6 | 153.1   |       | 136.1   |         | 1   |

# Nuclear proteome

| Protein No. | Leading protein name  | Sequence     | Mascot Score | Variable Modifications | SILAC State | Charge | m/z       |
|-------------|-----------------------|--------------|--------------|------------------------|-------------|--------|-----------|
| N-75        | sp P63165 SUMO1_HUMAN | VIGQDSSEIHFK | 54.03        | Unmodified             | Light       | 2      | 680.34879 |

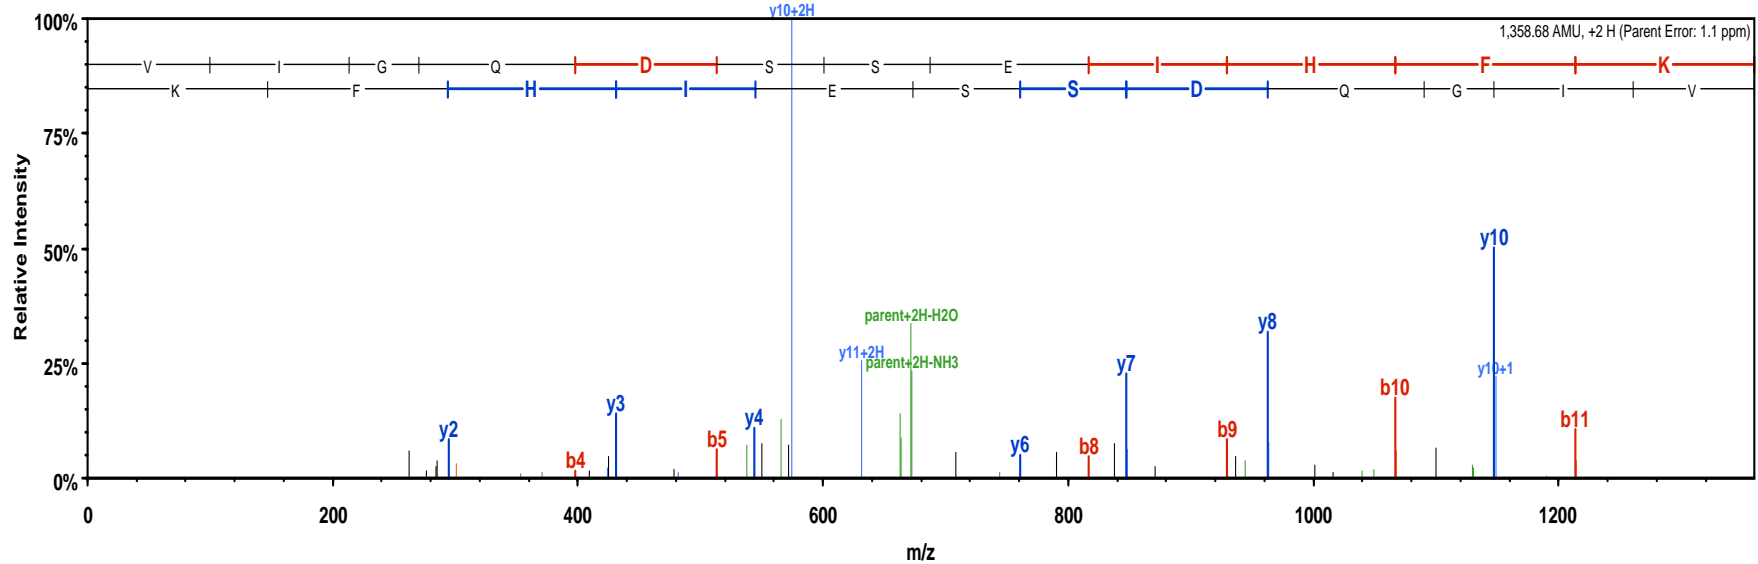

| ... | B Ions  | B+2H  | B-NH3   | B-H2O   | AA | Y Ions  | Y+2H  | Y-NH3   | Y-H2O   | ... |
|-----|---------|-------|---------|---------|----|---------|-------|---------|---------|-----|
| 1   | 100.1   |       |         |         | V  | 1,359.7 | 680.3 | 1,342.7 | 1,341.7 | 12  |
| 2   | 213.2   |       |         |         | I  | 1,260.6 | 630.8 | 1,243.6 | 1,242.6 | 11  |
| 3   | 270.2   |       |         |         | G  | 1,147.5 | 574.3 | 1,130.5 | 1,129.5 | 10  |
| 4   | 398.2   |       | 381.2   |         | Q  | 1,090.5 | 545.8 | 1,073.5 | 1,072.5 | 9   |
| 5   | 513.3   |       | 496.2   | 495.3   | D  | 962.5   | 481.7 | 945.4   | 944.4   | 8   |
| 6   | 600.3   | 300.7 | 583.3   | 582.3   | S  | 847.4   | 424.2 | 830.4   | 829.4   | 7   |
| 7   | 687.3   | 344.2 | 670.3   | 669.3   | S  | 760.4   | 380.7 | 743.4   | 742.4   | 6   |
| 8   | 816.4   | 408.7 | 799.3   | 798.4   | E  | 673.4   | 337.2 | 656.3   | 655.4   | 5   |
| 9   | 929.5   | 465.2 | 912.4   | 911.4   | I  | 544.3   | 272.7 | 527.3   |         | 4   |
| 10  | 1,066.5 | 533.8 | 1,049.5 | 1,048.5 | H  | 431.2   | 216.1 | 414.2   |         | 3   |
| 11  | 1,213.6 | 607.3 | 1,196.6 | 1,195.6 | F  | 294.2   |       | 277.2   |         | 2   |
| 12  | 1,359.7 | 680.3 | 1,342.7 | 1,341.7 | K  | 147.1   |       | 130.1   |         | 1   |

# Nuclear proteome

| Protein No. | Leading protein name | Sequence     | Mascot Score | Variable Modifications | SILAC State | Charge | m/z      |
|-------------|----------------------|--------------|--------------|------------------------|-------------|--------|----------|
| N-76        | sp Q9NRP0 U527_HUMAN | VPFLVLECPNLK | 53.58        | Unmodified             | Light       | 2      | 714.8996 |

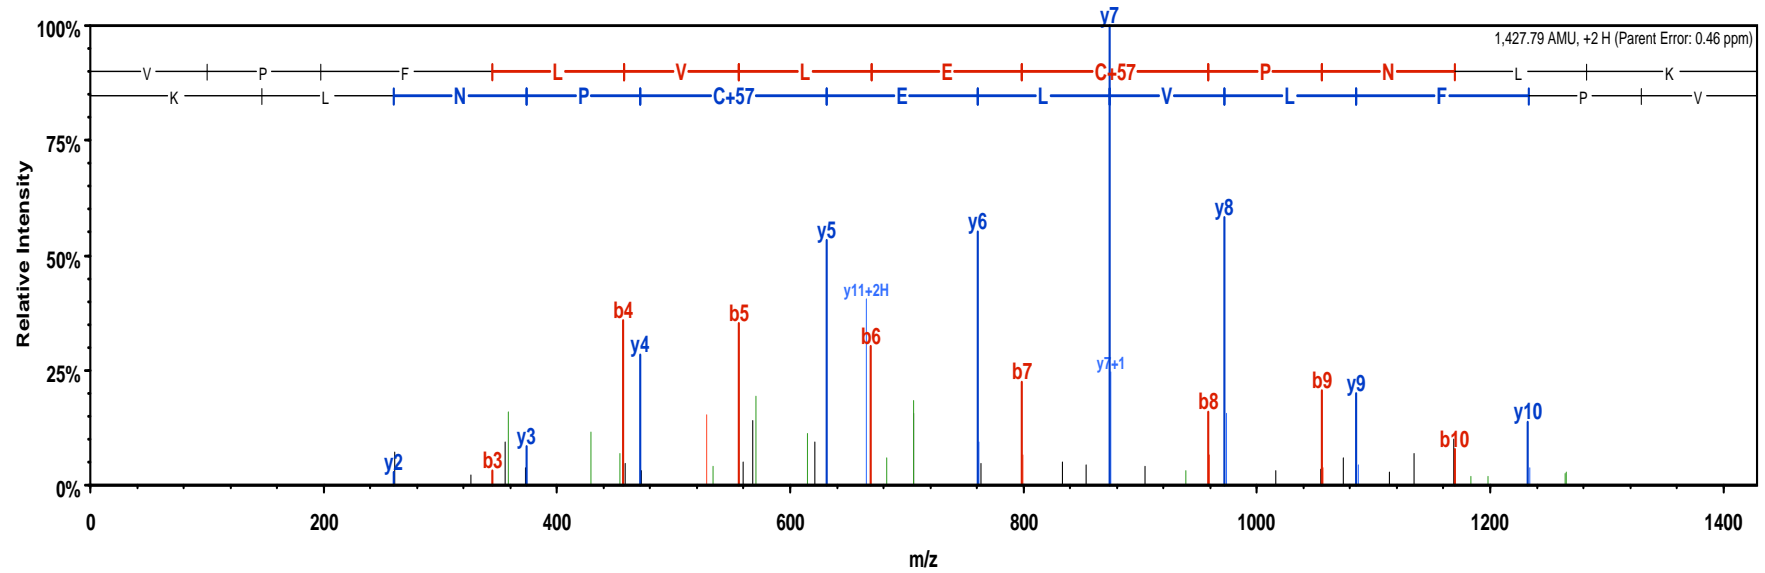

| ... | B Ions  | B+2H  | B-NH3   | B-H2O   | AA   | Y Ions  | Y+2H  | Y-NH3   | Y-H2O   | ... |
|-----|---------|-------|---------|---------|------|---------|-------|---------|---------|-----|
| 1   | 100.1   |       |         |         | V    | 1,428.8 | 714.9 | 1,411.8 | 1,410.8 | 12  |
| 2   | 197.1   |       |         |         | P    | 1,329.7 | 665.4 | 1,312.7 | 1,311.7 | 11  |
| 3   | 344.2   |       |         |         | F    | 1,232.7 | 616.8 | 1,215.6 | 1,214.7 | 10  |
| 4   | 457.3   |       |         |         | L    | 1,085.6 | 543.3 | 1,068.6 | 1,067.6 | 9   |
| 5   | 556.3   |       |         |         | V    | 972.5   | 486.8 | 955.5   | 954.5   | 8   |
| 6   | 669.4   | 335.2 |         |         | L    | 873.5   | 437.2 | 856.4   | 855.4   | 7   |
| 7   | 798.5   | 399.7 |         | 780.5   | E    | 760.4   | 380.7 | 743.3   | 742.4   | 6   |
| 8   | 958.5   | 479.8 |         | 940.5   | C+57 | 631.3   |       | 614.3   |         | 5   |
| 9   | 1,055.6 | 528.3 |         | 1,037.5 | P    | 471.3   |       | 454.3   |         | 4   |
| 10  | 1,169.6 | 585.3 | 1,152.6 | 1,151.6 | N    | 374.2   |       | 357.2   |         | 3   |
| 11  | 1,282.7 | 641.8 | 1,265.7 | 1,264.7 | L    | 260.2   |       | 243.2   |         | 2   |
| 12  | 1,428.8 | 714.9 | 1,411.8 | 1,410.8 | K    | 147.1   |       | 130.1   |         | 1   |

# Nuclear proteome

| Protein No. | Leading protein name  | Sequence        | Mascot Score | Variable Modifications | SILAC State | Charge | m/z       |
|-------------|-----------------------|-----------------|--------------|------------------------|-------------|--------|-----------|
| N-77        | sp Q9NZ45 CISD1_HUMAN | HNEETGDNVGPLIIK | 53.38        | Unmodified             | Light       | 2      | 818.42048 |

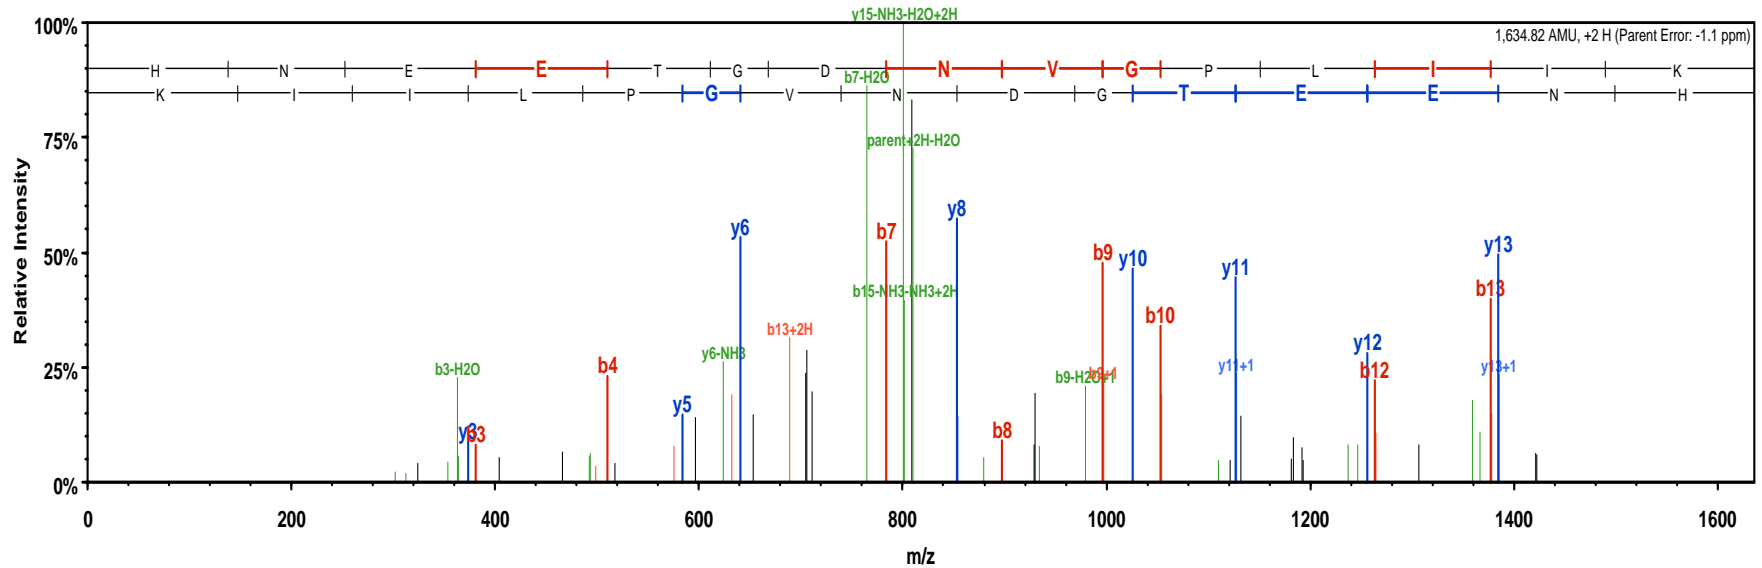

| ... | B Ions  | B+2H  | B-NH3   | B-H2O   | AA | Y Ions  | Y+2H  | Y-NH3   | Y-H2O   | ... |
|-----|---------|-------|---------|---------|----|---------|-------|---------|---------|-----|
| 1   | 138.1   | 69.5  |         |         | H  | 1,635.8 | 818.4 | 1,618.8 | 1,617.8 | 15  |
| 2   | 252.1   | 126.6 | 235.1   |         | N  | 1,498.8 | 749.9 | 1,481.7 | 1,480.8 | 14  |
| 3   | 381.2   | 191.1 | 364.1   | 363.1   | E  | 1,384.7 | 692.9 | 1,367.7 | 1,366.7 | 13  |
| 4   | 510.2   | 255.6 | 493.2   | 492.2   | E  | 1,255.7 | 628.3 | 1,238.7 | 1,237.7 | 12  |
| 5   | 611.2   | 306.1 | 594.2   | 593.2   | T  | 1,126.6 | 563.8 | 1,109.6 | 1,108.6 | 11  |
| 6   | 668.3   | 334.6 | 651.2   | 650.3   | G  | 1,025.6 | 513.3 | 1,008.6 | 1,007.6 | 10  |
| 7   | 783.3   | 392.1 | 766.3   | 765.3   | D  | 968.6   | 484.8 | 951.6   | 950.6   | 9   |
| 8   | 897.3   | 449.2 | 880.3   | 879.3   | N  | 853.6   | 427.3 | 836.5   |         | 8   |
| 9   | 996.4   | 498.7 | 979.4   | 978.4   | V  | 739.5   | 370.3 | 722.5   |         | 7   |
| 10  | 1,053.4 | 527.2 | 1,036.4 | 1,035.4 | G  | 640.4   | 320.7 | 623.4   |         | 6   |
| 11  | 1,150.5 | 575.7 | 1,133.4 | 1,132.5 | P  | 583.4   |       | 566.4   |         | 5   |
| 12  | 1,263.6 | 632.3 | 1,246.5 | 1,245.5 | L  | 486.4   |       | 469.3   |         | 4   |
| 13  | 1,376.6 | 688.8 | 1,359.6 | 1,358.6 | I  | 373.3   |       | 356.3   |         | 3   |
| 14  | 1,489.7 | 745.4 | 1,472.7 | 1,471.7 | I  | 260.2   |       | 243.2   |         | 2   |
| 15  | 1,635.8 | 818.4 | 1,618.8 | 1,617.8 | K  | 147.1   |       | 130.1   |         | 1   |

# Nuclear proteome

| Protein No. | Leading protein name  | Sequence                     | Mascot Score | Variable Modifications | SILAC State | Charge | m/z       |
|-------------|-----------------------|------------------------------|--------------|------------------------|-------------|--------|-----------|
| N-78        | sp Q9Y282 ERGI3_HUMAN | VEVTVDFPDSLDPDRCESCYGAEAEDIK | 53.1         | Unmodified             | Light       | 3      | 1072.8043 |

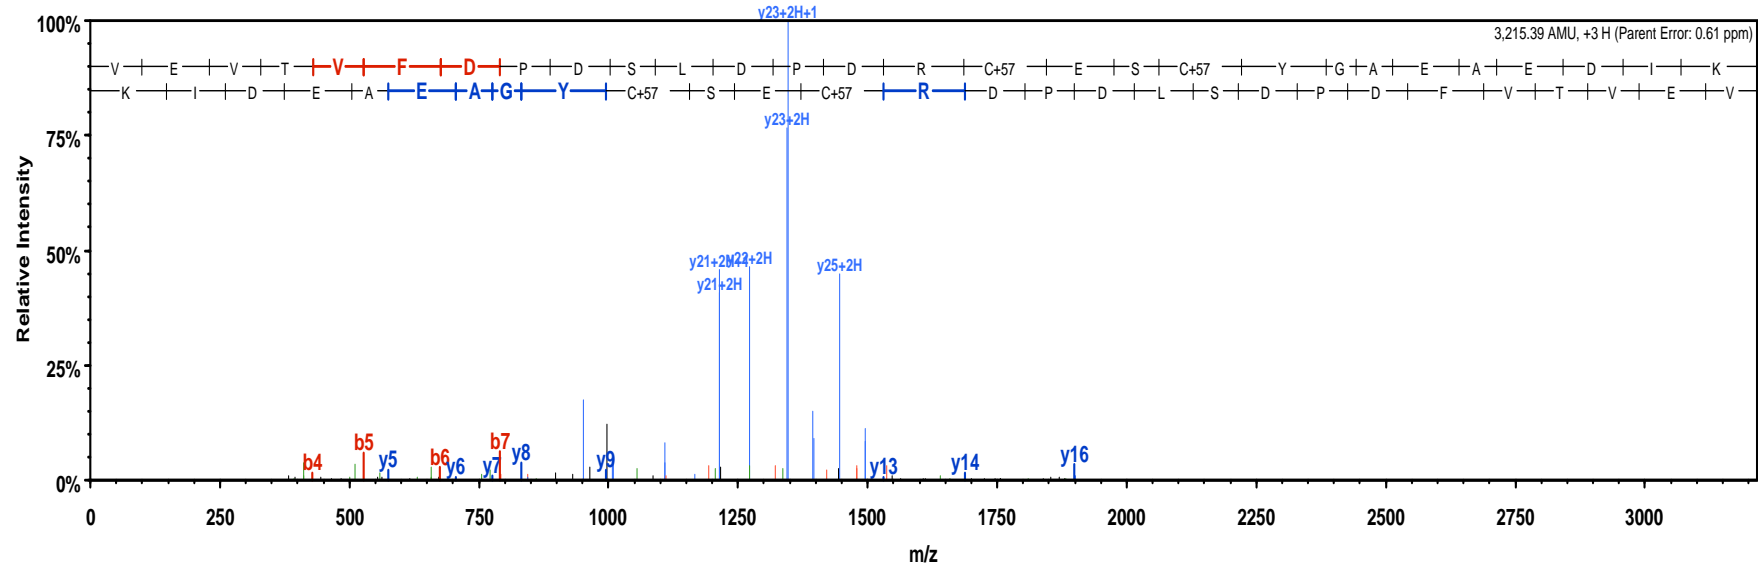

| ... | B Ions  | E+2H    | B-NH3   | B-H2O   | AA   | Y Ions  | Y+2H    | Y-NH3   | Y-H2O   | ... |
|-----|---------|---------|---------|---------|------|---------|---------|---------|---------|-----|
| 1   | 100.1   |         |         |         | V    | 3,216.4 | 1,608.7 | 3,199.4 | 3,198.4 | 28  |
| 2   | 229.1   |         |         | 211.1   | E    | 3,117.3 | 1,559.2 | 3,100.3 | 3,099.3 | 27  |
| 3   | 328.2   |         |         | 310.2   | V    | 2,988.3 | 1,494.6 | 2,971.3 | 2,970.3 | 26  |
| 4   | 429.2   |         |         | 411.2   | T    | 2,889.2 | 1,445.1 | 2,872.2 | 2,871.2 | 25  |
| 5   | 528.3   |         |         | 510.3   | V    | 2,788.2 | 1,394.6 | 2,771.1 | 2,770.2 | 24  |
| 6   | 675.4   | 338.2   |         | 657.4   | F    | 2,689.1 | 1,345.1 | 2,672.1 | 2,671.1 | 23  |
| 7   | 790.4   | 395.7   |         | 772.4   | D    | 2,542.0 | 1,271.5 | 2,525.0 | 2,524.0 | 22  |
| 8   | 887.5   | 444.2   |         | 869.4   | P    | 2,427.0 | 1,214.0 | 2,410.0 | 2,409.0 | 21  |
| 9   | 1,002.5 | 501.7   |         | 984.5   | D    | 2,330.0 | 1,165.5 | 2,312.9 | 2,311.9 | 20  |
| 10  | 1,089.5 | 545.3   |         | 1,071.5 | S    | 2,214.9 | 1,108.0 | 2,197.9 | 2,196.9 | 19  |
| 11  | 1,202.6 | 601.8   |         | 1,184.6 | L    | 2,127.9 | 1,064.5 | 2,110.9 | 2,109.9 | 18  |
| 12  | 1,317.6 | 659.3   |         | 1,299.6 | D    | 2,014.8 | 1,007.9 | 1,997.8 | 1,996.8 | 17  |
| 13  | 1,414.7 | 707.8   |         | 1,396.7 | P    | 1,899.8 | 950.4   | 1,882.8 | 1,881.8 | 16  |
| 14  | 1,529.7 | 765.4   |         | 1,511.7 | D    | 1,802.7 | 901.9   | 1,785.7 | 1,784.7 | 15  |
| 15  | 1,685.8 | 843.4   | 1,668.8 | 1,667.8 | R    | 1,687.7 | 844.4   | 1,670.7 | 1,669.7 | 14  |
| 16  | 1,845.8 | 923.4   | 1,828.8 | 1,827.8 | C+57 | 1,531.6 | 766.3   | 1,514.6 | 1,513.6 | 13  |
| 17  | 1,974.9 | 987.9   | 1,957.8 | 1,956.9 | E    | 1,371.6 | 686.3   | 1,354.5 | 1,353.6 | 12  |
| 18  | 2,061.9 | 1,031.5 | 2,044.9 | 2,043.9 | S    | 1,242.5 | 621.8   | 1,225.5 | 1,224.5 | 11  |
| 19  | 2,221.9 | 1,111.5 | 2,204.9 | 2,203.9 | C+57 | 1,155.5 | 578.3   | 1,138.5 | 1,137.5 | 10  |
| 20  | 2,385.0 | 1,193.0 | 2,368.0 | 2,367.0 | V    | 995.5   | 498.2   | 978.4   | 977.5   | 9   |
| 21  | 2,442.0 | 1,221.5 | 2,425.0 | 2,424.0 | G    | 832.4   | 416.7   | 815.4   | 814.4   | 8   |
| 22  | 2,513.1 | 1,257.0 | 2,496.0 | 2,495.0 | A    | 775.4   | 388.2   | 758.4   | 757.4   | 7   |
| 23  | 2,642.1 | 1,321.6 | 2,625.1 | 2,624.1 | E    | 704.3   | 352.7   | 687.3   | 686.3   | 6   |
| 24  | 2,713.1 | 1,357.1 | 2,696.1 | 2,695.1 | A    | 575.3   |         | 558.3   | 557.3   | 5   |
| 25  | 2,842.2 | 1,421.6 | 2,825.2 | 2,824.2 | E    | 504.3   |         | 487.2   | 486.3   | 4   |
| 26  | 2,957.2 | 1,479.1 | 2,940.2 | 2,939.2 | D    | 375.2   |         | 358.2   | 357.2   | 3   |
| 27  | 3,070.3 | 1,535.7 | 3,053.3 | 3,052.3 | I    | 260.2   |         | 243.2   |         | 2   |
| 28  | 3,216.4 | 1,608.7 | 3,199.4 | 3,198.4 | K    | 147.1   |         | 130.1   |         | 1   |

# Nuclear proteome

| Protein No. | Leading protein name | Sequence     | Mascot Score | Variable Modifications | SILAC State | Charge | m/z       |
|-------------|----------------------|--------------|--------------|------------------------|-------------|--------|-----------|
| N-79        | spIP48730IKC1D_HUMAN | MMQGGVGIPTIR | 53.08        | Oxidation (M)          |             | 2      | 638.33103 |

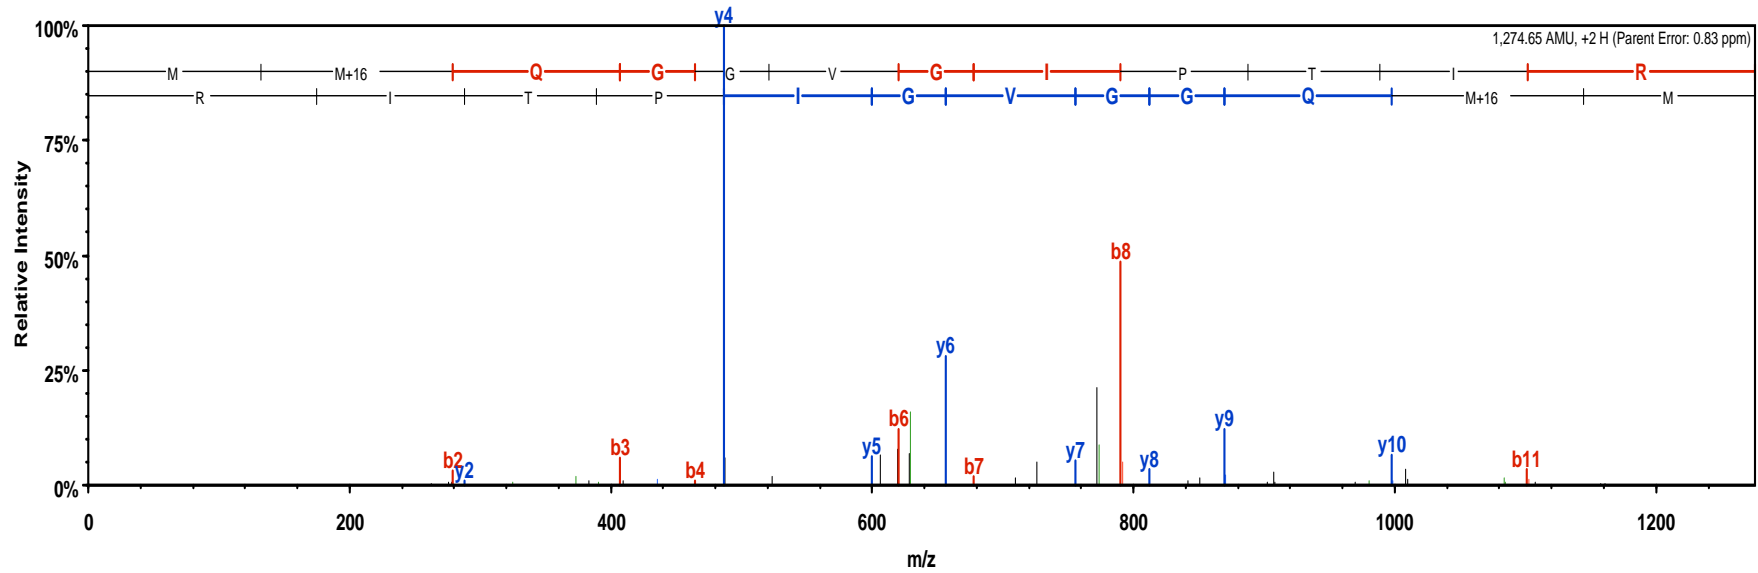

| ... | B Ions  | B+2H  | B-NH3   | B-H2O   | AA   | Y Ions  | Y+2H  | Y-NH3   | Y-H2O   | ... |
|-----|---------|-------|---------|---------|------|---------|-------|---------|---------|-----|
| 1   | 132.0   |       |         |         | M    | 1,275.7 | 638.3 | 1,258.6 | 1,257.6 | 12  |
| 2   | 279.1   |       |         |         | M+16 | 1,144.6 | 572.8 | 1,127.6 | 1,126.6 | 11  |
| 3   | 407.1   |       | 390.1   |         | Q    | 997.6   | 499.3 | 980.6   | 979.6   | 10  |
| 4   | 464.2   |       | 447.1   |         | G    | 869.5   | 435.3 | 852.5   | 851.5   | 9   |
| 5   | 521.2   |       | 504.2   |         | G    | 812.5   | 406.8 | 795.5   | 794.5   | 8   |
| 6   | 620.3   | 310.6 | 603.2   |         | V    | 755.5   | 378.2 | 738.5   | 737.5   | 7   |
| 7   | 677.3   | 339.1 | 660.2   |         | G    | 656.4   | 328.7 | 639.4   | 638.4   | 6   |
| 8   | 790.4   | 395.7 | 773.3   |         | I    | 599.4   |       | 582.4   | 581.4   | 5   |
| 9   | 887.4   | 444.2 | 870.4   |         | P    | 486.3   |       | 469.3   | 468.3   | 4   |
| 10  | 988.5   | 494.7 | 971.4   | 970.4   | T    | 389.3   |       | 372.2   | 371.2   | 3   |
| 11  | 1,101.5 | 551.3 | 1,084.5 | 1,083.5 | I    | 288.2   |       | 271.2   |         | 2   |
| 12  | 1,275.7 | 638.3 | 1,258.6 | 1,257.6 | R    | 175.1   |       | 158.1   |         | 1   |



# Nuclear proteome

| Protein No. | Leading protein name  | Sequence        | Mascot Score | Variable Modifications | SILAC State | Charge | m/z       |
|-------------|-----------------------|-----------------|--------------|------------------------|-------------|--------|-----------|
| N-80        | sp Q96DE5 CJ104_HUMAN | FKPIEQLLGFTPSSG | 53.01        | Unmodified             | Light       | 2      | 810.93523 |

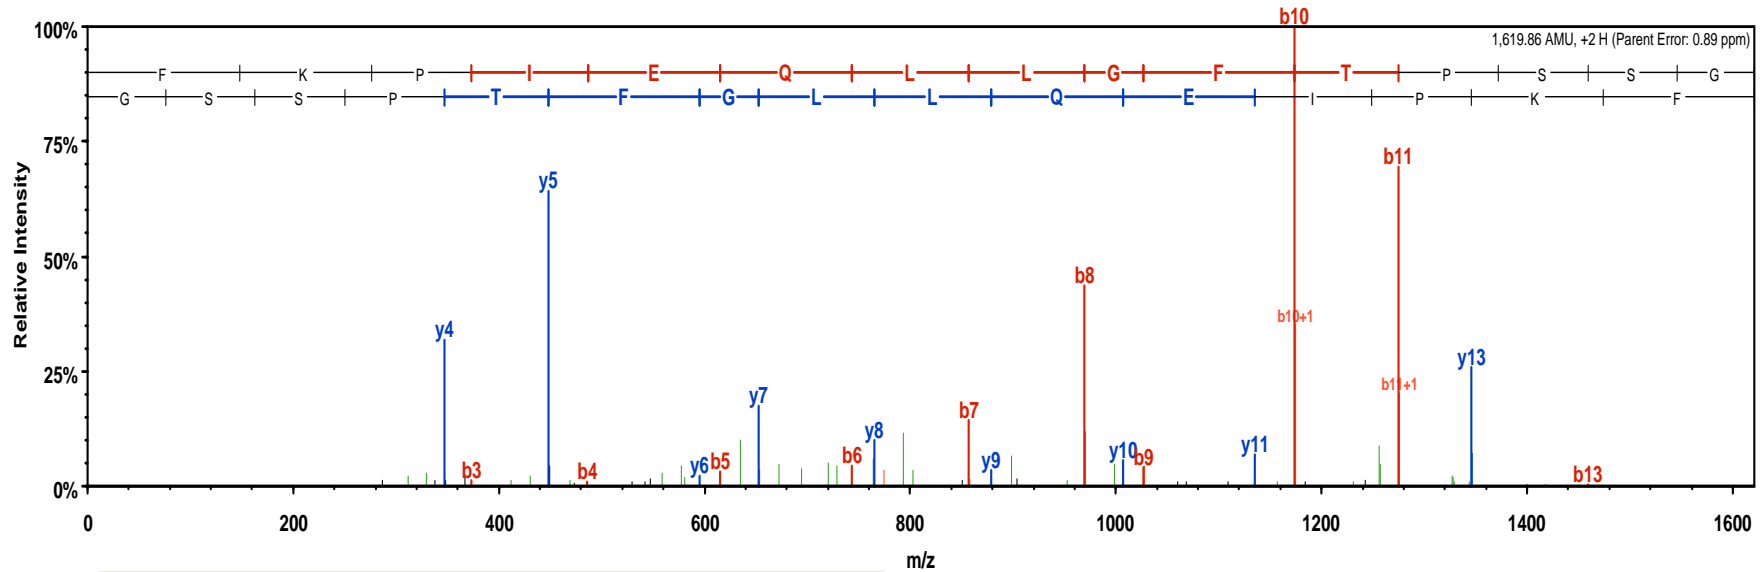

| ... | B Ions  | B+2H  | B-NH3   | B-H2O   | AA | Y Ions  | Y+2H  | Y-NH3   | Y-H2O   | ... |
|-----|---------|-------|---------|---------|----|---------|-------|---------|---------|-----|
| 1   | 148.1   |       |         |         | F  | 1,620.9 | 810.9 | 1,603.8 | 1,602.9 | 15  |
| 2   | 276.2   | 138.6 | 259.1   |         | K  | 1,473.8 | 737.4 | 1,456.8 | 1,455.8 | 14  |
| 3   | 373.2   | 187.1 | 356.2   |         | P  | 1,345.7 |       | 1,328.7 | 1,327.7 | 13  |
| 4   | 486.3   | 243.7 | 469.3   |         | I  | 1,248.6 |       | 1,231.6 | 1,230.6 | 12  |
| 5   | 615.4   | 308.2 | 598.3   | 597.3   | E  | 1,135.6 |       | 1,118.5 | 1,117.6 | 11  |
| 6   | 743.4   | 372.2 | 726.4   | 725.4   | Q  | 1,006.5 |       | 989.5   | 988.5   | 10  |
| 7   | 856.5   | 428.8 | 839.5   | 838.5   | L  | 878.5   |       |         | 860.5   | 9   |
| 8   | 969.6   | 485.3 | 952.6   | 951.6   | L  | 765.4   |       |         | 747.4   | 8   |
| 9   | 1,026.6 | 513.8 | 1,009.6 | 1,008.6 | G  | 652.3   |       |         | 634.3   | 7   |
| 10  | 1,173.7 | 587.3 | 1,156.6 | 1,155.7 | F  | 595.3   |       |         | 577.3   | 6   |
| 11  | 1,274.7 | 637.9 | 1,257.7 | 1,256.7 | T  | 448.2   |       |         | 430.2   | 5   |
| 12  | 1,371.8 | 686.4 | 1,354.7 | 1,353.8 | P  | 347.2   |       |         | 329.1   | 4   |
| 13  | 1,458.8 | 729.9 | 1,441.8 | 1,440.8 | S  | 250.1   |       |         | 232.1   | 3   |
| 14  | 1,545.8 | 773.4 | 1,528.8 | 1,527.8 | S  | 163.1   |       |         | 145.1   | 2   |
| 15  | 1,620.9 | 810.9 | 1,603.8 | 1,602.9 | G  | 76.0    |       |         |         | 1   |

# Nuclear proteome

| Protein No. | Leading protein name  | Sequence        | Mascot Score | Variable Modifications | SILAC State | Charge | m/z       |
|-------------|-----------------------|-----------------|--------------|------------------------|-------------|--------|-----------|
| N-81        | sp Q86WA8 LONP2_HUMAN | GPILCFVGPVGGVVK | 52.9         | Unmodified             | Light       | 2      | 699.38412 |

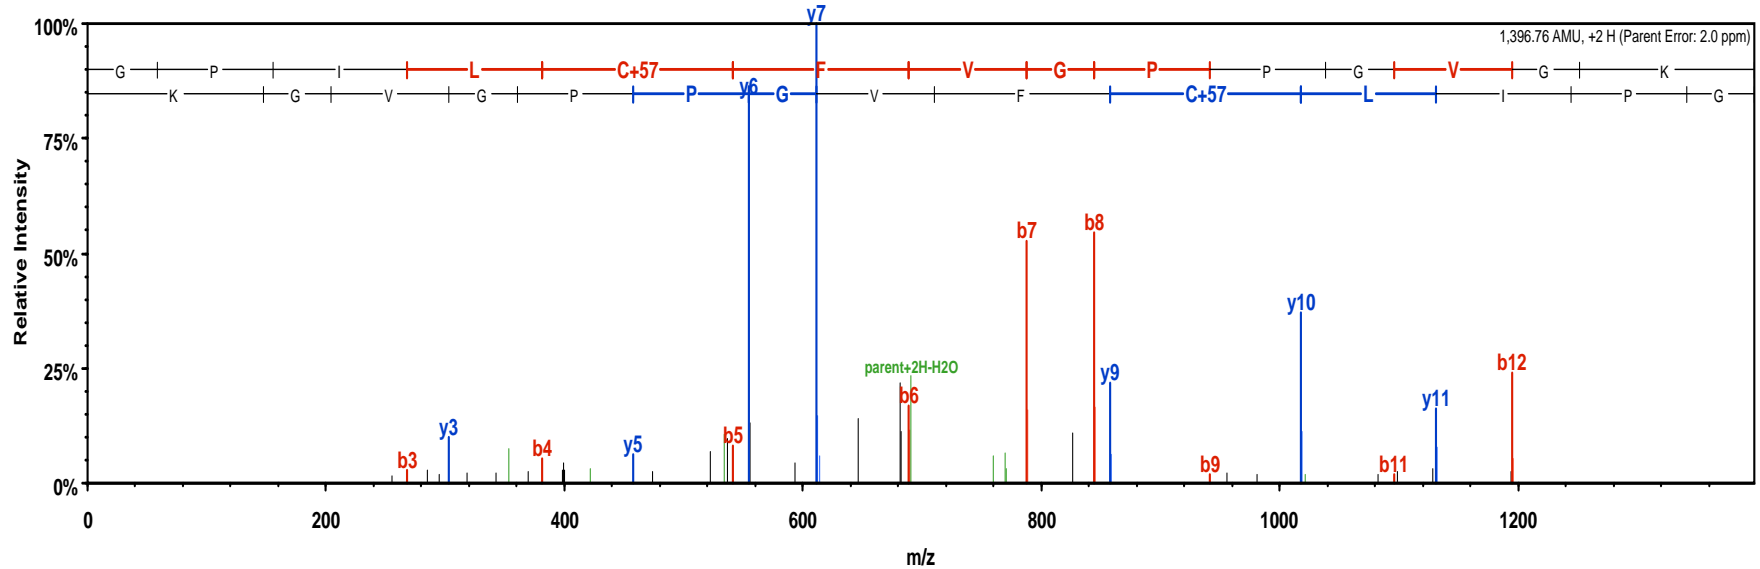

| ... | B Ions  | B+2H  | B-NH3   | B-H2O | AA   | Y Ions  | Y+2H  | Y-MH3   | Y-H2O | ... |
|-----|---------|-------|---------|-------|------|---------|-------|---------|-------|-----|
| 1   | 58.0    |       |         |       | G    | 1,397.8 | 699.4 | 1,380.7 |       | 14  |
| 2   | 155.1   |       |         |       | P    | 1,340.7 | 670.9 | 1,323.7 |       | 13  |
| 3   | 268.2   |       |         |       | I    | 1,243.7 | 622.3 | 1,226.7 |       | 12  |
| 4   | 381.2   |       |         |       | L    | 1,130.6 | 565.8 | 1,113.6 |       | 11  |
| 5   | 541.3   |       |         |       | C+57 | 1,017.5 | 509.3 | 1,000.5 |       | 10  |
| 6   | 688.3   | 344.7 |         |       | F    | 857.5   | 429.2 | 840.5   |       | 9   |
| 7   | 787.4   | 394.2 |         |       | V    | 710.4   | 355.7 | 693.4   |       | 8   |
| 8   | 844.4   | 422.7 |         |       | G    | 611.4   | 306.2 | 594.3   |       | 7   |
| 9   | 941.5   | 471.2 |         |       | P    | 554.3   | 277.7 | 537.3   |       | 6   |
| 10  | 1,038.5 | 519.8 |         |       | P    | 457.3   |       | 440.3   |       | 5   |
| 11  | 1,095.6 | 548.3 |         |       | G    | 360.2   |       | 343.2   |       | 4   |
| 12  | 1,194.6 | 597.8 |         |       | V    | 303.2   |       | 286.2   |       | 3   |
| 13  | 1,251.7 | 626.3 |         |       | G    | 204.1   |       | 187.1   |       | 2   |
| 14  | 1,397.8 | 699.4 | 1,380.7 |       | K    | 147.1   |       | 130.1   |       | 1   |

# Nuclear proteome

| Protein No. | Leading protein name  | Sequence            | Mascot Score | Variable Modifications | SILAC State | Charge | m/z      |
|-------------|-----------------------|---------------------|--------------|------------------------|-------------|--------|----------|
| N-82        | sp Q96C01 F136A_HUMAN | CHVPLAQAQALVTSELELK | 52.5         | Unmodified             | Light       | 2      | 997.5224 |

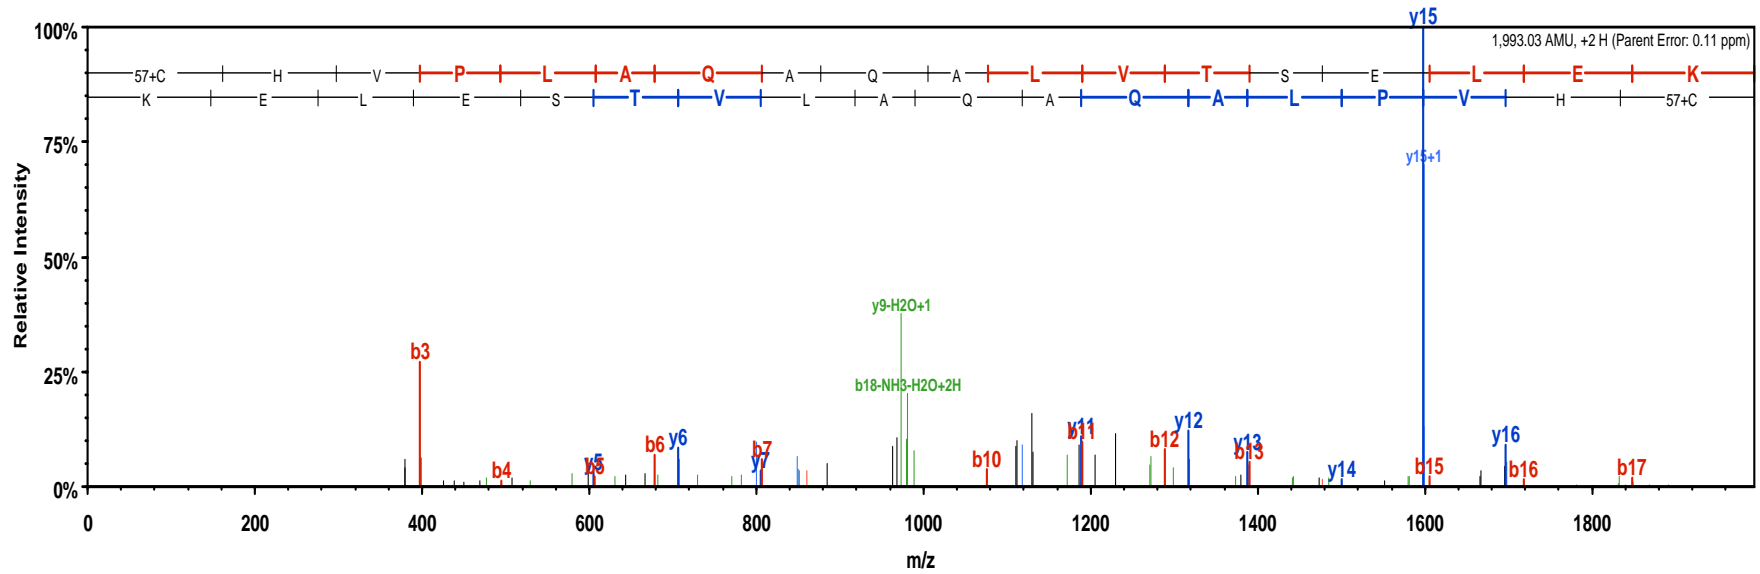

| ... | B Ions  | B+2H  | B-NH3   | B-H2O   | AA   | Y Ions  | Y+2H  | Y-NH3   | Y-H2O   | ... |
|-----|---------|-------|---------|---------|------|---------|-------|---------|---------|-----|
| 1   | 161.0   |       |         |         | C+57 | 1,994.0 | 997.5 | 1,977.0 | 1,976.0 | 18  |
| 2   | 298.1   | 149.6 |         |         | H    | 1,834.0 | 917.5 | 1,817.0 | 1,816.0 | 17  |
| 3   | 397.2   | 199.1 |         |         | V    | 1,696.9 | 849.0 | 1,679.9 | 1,678.9 | 16  |
| 4   | 494.2   | 247.6 |         |         | P    | 1,597.9 | 799.4 | 1,580.9 | 1,579.9 | 15  |
| 5   | 607.3   | 304.2 |         |         | L    | 1,500.8 | 750.9 | 1,483.8 | 1,482.8 | 14  |
| 6   | 678.3   | 339.7 |         |         | A    | 1,387.7 | 694.4 | 1,370.7 | 1,369.7 | 13  |
| 7   | 806.4   | 403.7 | 789.4   |         | Q    | 1,316.7 | 658.9 | 1,299.7 | 1,298.7 | 12  |
| 8   | 877.4   | 439.2 | 860.4   |         | A    | 1,188.6 | 594.8 | 1,171.6 | 1,170.6 | 11  |
| 9   | 1,005.5 | 503.3 | 988.5   |         | Q    | 1,117.6 | 559.3 | 1,100.6 | 1,099.6 | 10  |
| 10  | 1,076.5 | 538.8 | 1,059.5 |         | A    | 989.6   | 495.3 | 972.5   | 971.5   | 9   |
| 11  | 1,189.6 | 595.3 | 1,172.6 |         | L    | 918.5   | 459.8 | 901.5   | 900.5   | 8   |
| 12  | 1,288.7 | 644.8 | 1,271.7 |         | V    | 805.4   | 403.2 | 788.4   | 787.4   | 7   |
| 13  | 1,389.7 | 695.4 | 1,372.7 | 1,371.7 | T    | 706.4   | 353.7 | 689.3   | 688.4   | 6   |
| 14  | 1,476.8 | 738.9 | 1,459.7 | 1,458.8 | S    | 605.3   |       | 588.3   | 587.3   | 5   |
| 15  | 1,605.8 | 803.4 | 1,588.8 | 1,587.8 | E    | 518.3   |       | 501.3   | 500.3   | 4   |
| 16  | 1,718.9 | 859.9 | 1,701.9 | 1,700.9 | L    | 389.2   |       | 372.2   | 371.2   | 3   |
| 17  | 1,847.9 | 924.5 | 1,830.9 | 1,829.9 | E    | 276.2   |       | 259.1   | 258.1   | 2   |
| 18  | 1,994.0 | 997.5 | 1,977.0 | 1,976.0 | K    | 147.1   |       | 130.1   |         | 1   |

# Nuclear proteome

| Protein No. | Leading protein name  | Sequence     | Mascot Score | Variable Modifications | SILAC State | Charge | m/z       |
|-------------|-----------------------|--------------|--------------|------------------------|-------------|--------|-----------|
| N-83        | sp P68371 TBB2C_HUMAN | INVYYNEATGGK | 52.3         | Unmodified             | Heavy       | 2      | 664.82769 |

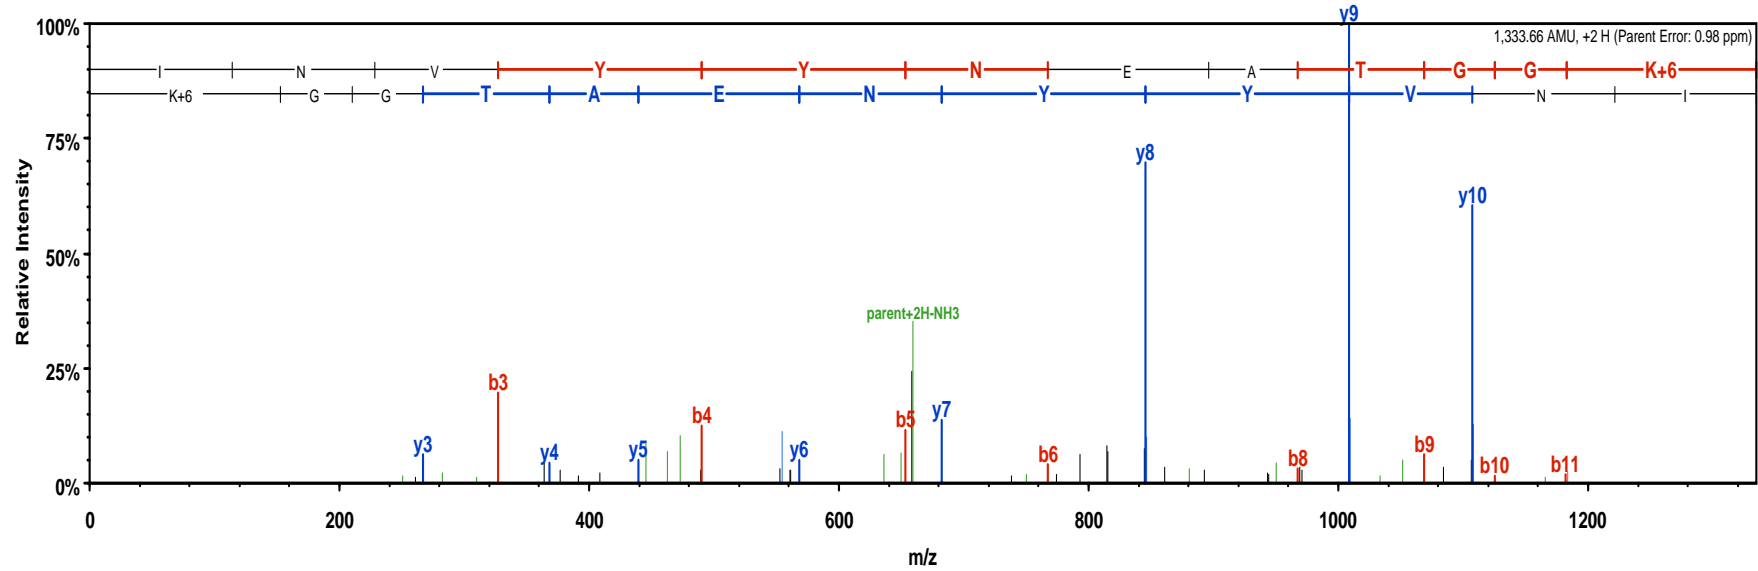

| ... | B Ions  | E+2H  | B-NH3   | B-H2O   | AA  | Y Ions  | Y+2H  | Y-NH3   | Y-H2O   | ... |
|-----|---------|-------|---------|---------|-----|---------|-------|---------|---------|-----|
| 1   | 114.1   |       |         |         | I   | 1,334.7 | 667.8 | 1,317.6 | 1,316.7 | 12  |
| 2   | 228.1   |       | 211.1   |         | N   | 1,221.6 | 611.3 | 1,204.6 | 1,203.6 | 11  |
| 3   | 327.2   |       | 310.2   |         | V   | 1,107.5 | 554.3 | 1,090.5 | 1,089.5 | 10  |
| 4   | 490.3   |       | 473.2   |         | Y   | 1,008.5 | 504.7 | 991.4   | 990.5   | 9   |
| 5   | 653.3   |       | 636.3   |         | Y   | 845.4   | 423.2 | 828.4   | 827.4   | 8   |
| 6   | 767.4   | 384.2 | 750.3   |         | N   | 682.3   | 341.7 | 665.3   | 664.3   | 7   |
| 7   | 896.4   | 448.7 | 879.4   | 878.4   | E   | 568.3   | 284.7 | 551.3   | 550.3   | 6   |
| 8   | 967.5   | 484.2 | 950.4   | 949.4   | A   | 439.3   |       | 422.2   | 421.3   | 5   |
| 9   | 1,068.5 | 534.8 | 1,051.5 | 1,050.5 | T   | 368.2   |       | 351.2   | 350.2   | 4   |
| 10  | 1,125.5 | 563.3 | 1,108.5 | 1,107.5 | G   | 267.2   |       | 250.1   |         | 3   |
| 11  | 1,182.5 | 591.8 | 1,165.5 | 1,164.5 | G   | 210.2   |       | 193.1   |         | 2   |
| 12  | 1,334.7 | 667.8 | 1,317.6 | 1,316.7 | K+6 | 153.1   |       | 136.1   |         | 1   |

# Nuclear proteome

| Protein No. | Leading protein name | Sequence        | Mascot Score | Variable Modifications | SILAC State | Charge | m/z       |
|-------------|----------------------|-----------------|--------------|------------------------|-------------|--------|-----------|
| N-84        | sp Q9UKY7 CDV3_HUMAN | AVTKDEDEWKELEQK | 52.19        | Unmodified             | Light       | 2      | 924.45471 |

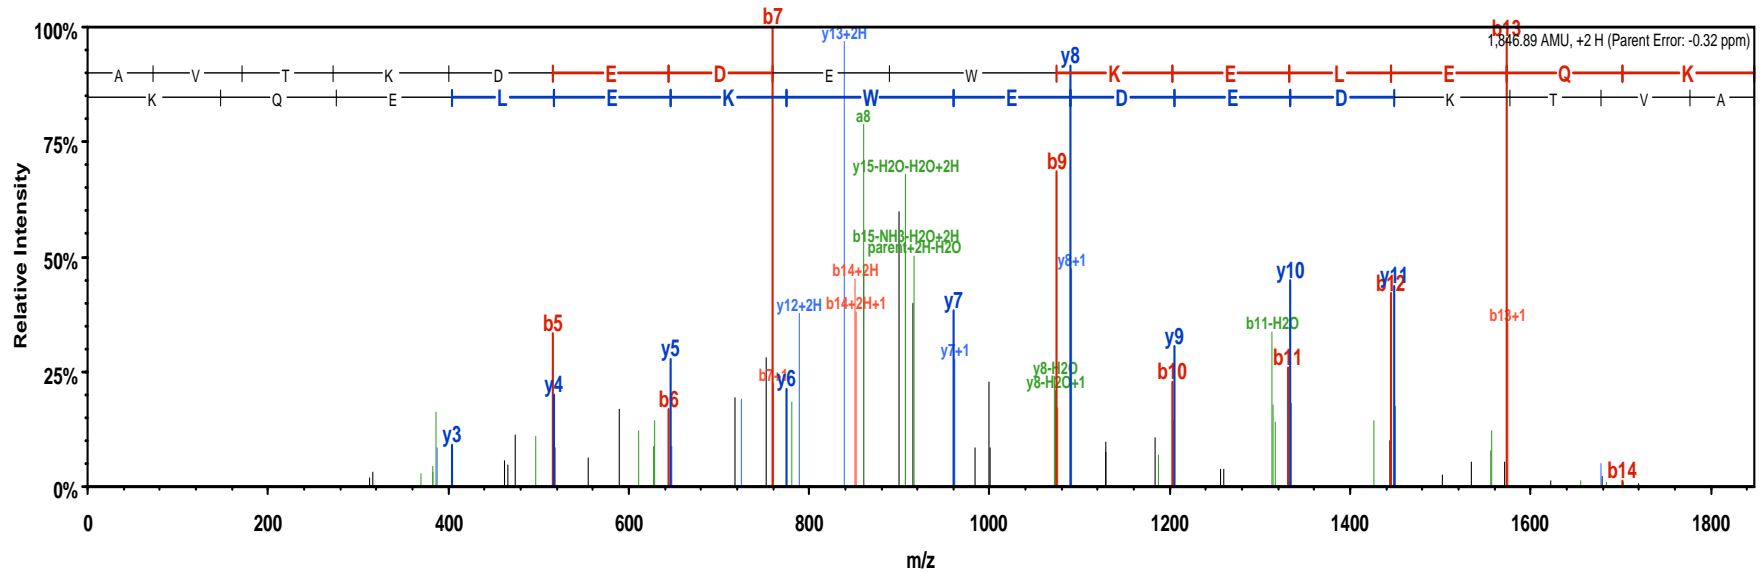

| ... | B Ions  | B+2H  | B-NH3   | B-H2O   | AA | Y Ions  | Y+2H  | Y-NH3   | Y-H2O   | ... |
|-----|---------|-------|---------|---------|----|---------|-------|---------|---------|-----|
| 1   | 72.0    |       |         |         | A  | 1,847.9 | 924.5 | 1,830.9 | 1,829.9 | 15  |
| 2   | 171.1   |       |         |         | V  | 1,776.9 | 888.9 | 1,759.8 | 1,758.9 | 14  |
| 3   | 272.2   |       |         | 254.1   | T  | 1,677.8 | 839.4 | 1,660.8 | 1,659.8 | 13  |
| 4   | 400.3   | 200.6 | 383.2   | 382.2   | K  | 1,576.7 | 788.9 | 1,559.7 | 1,558.7 | 12  |
| 5   | 515.3   | 258.1 | 498.3   | 497.3   | D  | 1,448.7 | 724.8 | 1,431.6 | 1,430.6 | 11  |
| 6   | 644.3   | 322.7 | 627.3   | 626.3   | E  | 1,333.6 | 667.3 | 1,316.6 | 1,315.6 | 10  |
| 7   | 759.4   | 380.2 | 742.3   | 741.3   | D  | 1,204.6 | 602.8 | 1,187.6 | 1,186.6 | 9   |
| 8   | 888.4   | 444.7 | 871.4   | 870.4   | E  | 1,089.6 | 545.3 | 1,072.5 | 1,071.5 | 8   |
| 9   | 1,074.5 | 537.7 | 1,057.4 | 1,056.5 | W  | 960.5   | 480.8 | 943.5   | 942.5   | 7   |
| 10  | 1,202.6 | 601.8 | 1,185.5 | 1,184.6 | K  | 774.4   | 387.7 | 757.4   | 756.4   | 6   |
| 11  | 1,331.6 | 666.3 | 1,314.6 | 1,313.6 | E  | 646.3   |       | 629.3   | 628.3   | 5   |
| 12  | 1,444.7 | 722.9 | 1,427.7 | 1,426.7 | L  | 517.3   |       | 500.3   | 499.3   | 4   |
| 13  | 1,573.7 | 787.4 | 1,556.7 | 1,555.7 | E  | 404.2   |       | 387.2   | 386.2   | 3   |
| 14  | 1,701.8 | 851.4 | 1,684.8 | 1,683.8 | Q  | 275.2   |       | 258.1   |         | 2   |
| 15  | 1,847.9 | 924.5 | 1,830.9 | 1,829.9 | K  | 147.1   |       | 130.1   |         | 1   |

# Nuclear proteome

| Protein No. | Leading protein name   | Sequence                    | Mascot Score | Variable Modifications | SILAC State | Charge | m/z       |
|-------------|------------------------|-----------------------------|--------------|------------------------|-------------|--------|-----------|
| N-85        | sp Q96CM8 IACSF2_HUMAN | DLVVAYGTTENSPVTFAHFPEDTVEQK | 51.41        | Unmodified             | Light       | 3      | 998.81709 |

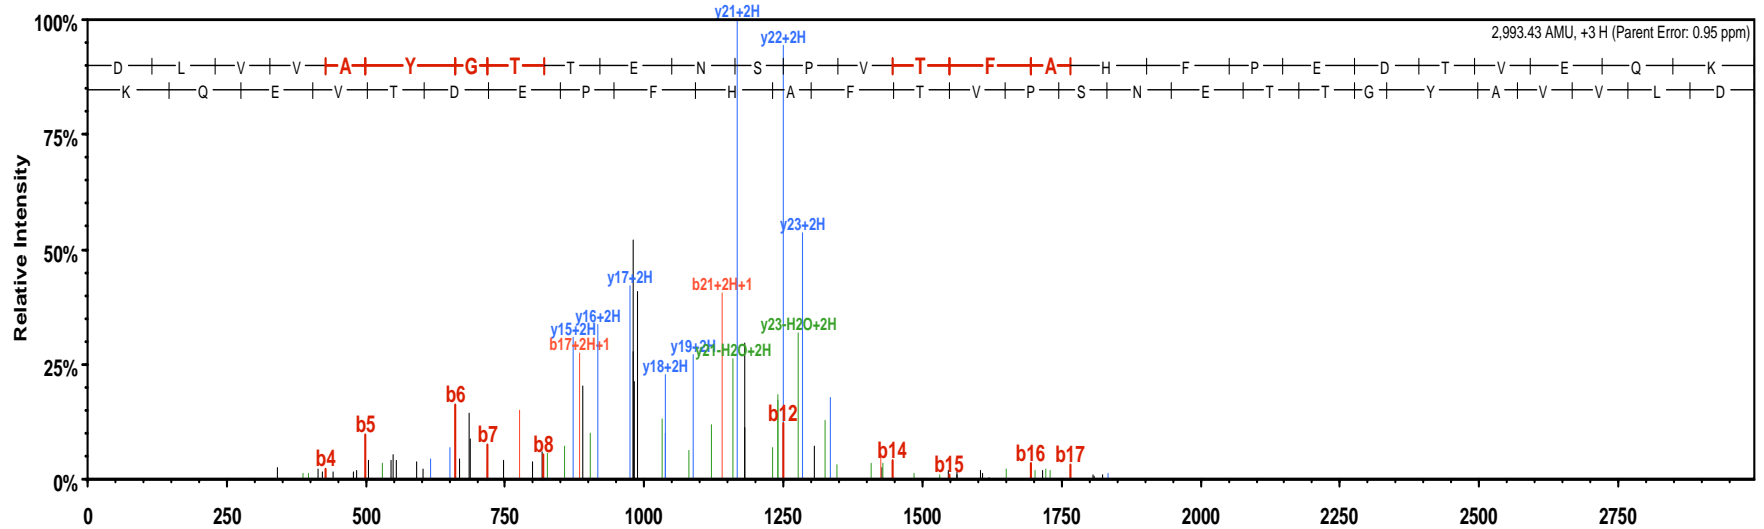

| ... | B Ions  | B+2H    | B-NH3   | B-H2O   | AA | Y Ions  | Y+2H    | Y-NH3   | Y-H2O   | ... | m/z |
|-----|---------|---------|---------|---------|----|---------|---------|---------|---------|-----|-----|
| 1   | 116.0   |         |         | 98.0    | D  | 2,994.4 | 1,497.7 | 2,977.4 | 2,976.4 | 27  |     |
| 2   | 229.1   |         |         | 211.1   | L  | 2,879.4 | 1,440.2 | 2,862.4 | 2,861.4 | 26  |     |
| 3   | 328.2   |         |         | 310.2   | V  | 2,766.3 | 1,383.7 | 2,749.3 | 2,748.3 | 25  |     |
| 4   | 427.3   |         |         | 409.2   | V  | 2,667.3 | 1,334.1 | 2,650.2 | 2,649.2 | 24  |     |
| 5   | 498.3   |         |         | 480.3   | A  | 2,568.2 | 1,284.6 | 2,551.2 | 2,550.2 | 23  |     |
| 6   | 661.4   | 331.2   |         | 643.3   | Y  | 2,497.2 | 1,249.1 | 2,480.1 | 2,479.1 | 22  |     |
| 7   | 718.4   | 359.7   |         | 700.4   | G  | 2,334.1 | 1,167.5 | 2,317.1 | 2,316.1 | 21  |     |
| 8   | 819.4   | 410.2   |         | 801.4   | T  | 2,277.1 | 1,139.0 | 2,260.0 | 2,259.1 | 20  |     |
| 9   | 920.5   | 460.7   |         | 902.5   | T  | 2,176.0 | 1,088.5 | 2,159.0 | 2,158.0 | 19  |     |
| 10  | 1,049.5 | 525.3   |         | 1,031.5 | E  | 2,075.0 | 1,038.0 | 2,057.9 | 2,057.0 | 18  |     |
| 11  | 1,163.6 | 582.3   | 1,146.5 | 1,145.5 | N  | 1,945.9 | 973.5   | 1,928.9 | 1,927.9 | 17  |     |
| 12  | 1,250.6 | 625.8   | 1,233.6 | 1,232.6 | S  | 1,831.9 | 916.4   | 1,814.9 | 1,813.9 | 16  |     |
| 13  | 1,347.6 | 674.3   | 1,330.6 | 1,329.6 | P  | 1,744.9 | 872.9   | 1,727.8 | 1,726.8 | 15  |     |
| 14  | 1,446.7 | 723.9   | 1,429.7 | 1,428.7 | V  | 1,647.8 | 824.4   | 1,630.8 | 1,629.8 | 14  |     |
| 15  | 1,547.8 | 774.4   | 1,530.7 | 1,529.7 | T  | 1,548.7 | 774.9   | 1,531.7 | 1,530.7 | 13  |     |
| 16  | 1,694.8 | 847.9   | 1,677.8 | 1,676.8 | F  | 1,447.7 | 724.3   | 1,430.7 | 1,429.7 | 12  |     |
| 17  | 1,765.9 | 883.4   | 1,748.8 | 1,747.9 | A  | 1,300.6 | 650.8   | 1,283.6 | 1,282.6 | 11  |     |
| 18  | 1,902.9 | 952.0   | 1,885.9 | 1,884.9 | H  | 1,229.6 | 615.3   | 1,212.6 | 1,211.6 | 10  |     |
| 19  | 2,050.0 | 1,025.5 | 2,033.0 | 2,032.0 | F  | 1,092.5 | 546.8   | 1,075.5 | 1,074.5 | 9   |     |
| 20  | 2,147.0 | 1,074.0 | 2,130.0 | 2,129.0 | P  | 945.5   | 473.2   | 928.4   | 927.4   | 8   |     |
| 21  | 2,276.1 | 1,138.5 | 2,259.1 | 2,258.1 | E  | 848.4   | 424.7   | 831.4   | 830.4   | 7   |     |
| 22  | 2,391.1 | 1,196.1 | 2,374.1 | 2,373.1 | D  | 719.4   | 360.2   | 702.3   | 701.3   | 6   |     |
| 23  | 2,492.2 | 1,246.6 | 2,475.1 | 2,474.2 | T  | 604.3   |         | 587.3   | 586.3   | 5   |     |
| 24  | 2,591.2 | 1,296.1 | 2,574.2 | 2,573.2 | V  | 503.3   |         | 486.3   | 485.3   | 4   |     |
| 25  | 2,720.3 | 1,360.6 | 2,703.2 | 2,702.3 | E  | 404.2   |         | 387.2   | 386.2   | 3   |     |
| 26  | 2,848.3 | 1,424.7 | 2,831.3 | 2,830.3 | Q  | 275.2   |         | 258.1   |         | 2   |     |
| 27  | 2,994.4 | 1,497.7 | 2,977.4 | 2,976.4 | K  | 147.1   |         | 130.1   |         | 1   |     |

# Nuclear proteome

| Protein No. | Leading protein name  | Sequence       | Mascot Score | Variable Modifications  | SILAC State | Charge | m/z       |
|-------------|-----------------------|----------------|--------------|-------------------------|-------------|--------|-----------|
| N-86        | sp A8MW06 TMSL3_HUMAN | SDKPDMAEIEKFDK | 51.06        | Acetyl (Protein N-term) | Light       | 3      | 565.60291 |

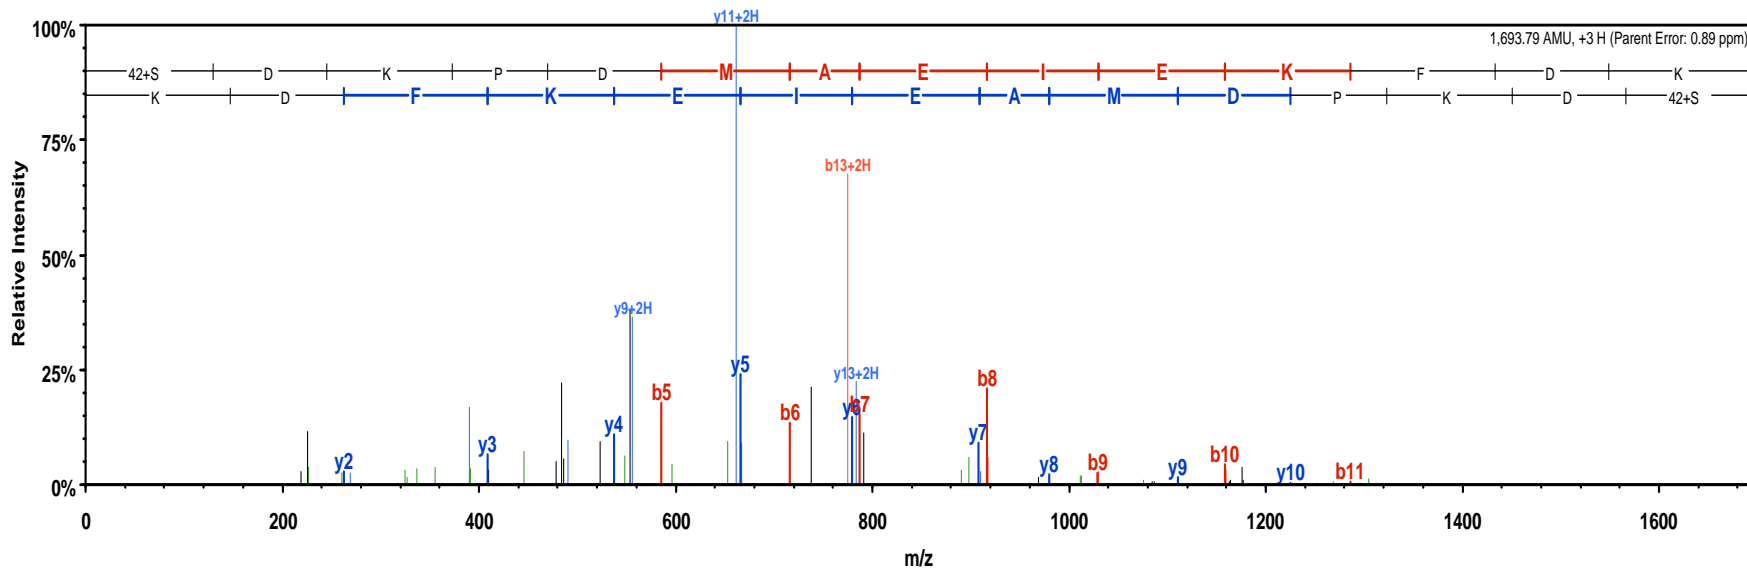

| ... | B Ions  | B+2H  | B-NH3   | B-H2O   | AA   | Y Ions  | Y+2H  | Y-NH3   | Y-H2O   | ... |
|-----|---------|-------|---------|---------|------|---------|-------|---------|---------|-----|
| 1   | 130.0   |       |         | 112.0   | S+42 | 1,694.8 | 847.9 | 1,677.8 | 1,676.8 | 14  |
| 2   | 245.1   |       |         | 227.1   | D    | 1,565.8 | 783.4 | 1,548.7 | 1,547.7 | 13  |
| 3   | 373.2   | 187.1 | 356.1   | 355.2   | K    | 1,450.7 | 725.9 | 1,433.7 | 1,432.7 | 12  |
| 4   | 470.2   | 235.6 | 453.2   | 452.2   | P    | 1,322.6 | 661.8 | 1,305.6 | 1,304.6 | 11  |
| 5   | 585.3   | 293.1 | 568.2   | 567.2   | D    | 1,225.6 | 613.3 | 1,208.6 | 1,207.6 | 10  |
| 6   | 716.3   | 358.6 | 699.3   | 698.3   | M    | 1,110.6 | 555.8 | 1,093.5 | 1,092.5 | 9   |
| 7   | 787.3   | 394.2 | 770.3   | 769.3   | A    | 979.5   | 490.3 | 962.5   | 961.5   | 8   |
| 8   | 916.4   | 458.7 | 899.3   | 898.4   | E    | 908.5   | 454.7 | 891.4   | 890.5   | 7   |
| 9   | 1,029.5 | 515.2 | 1,012.4 | 1,011.4 | I    | 779.4   | 390.2 | 762.4   | 761.4   | 6   |
| 10  | 1,158.5 | 579.8 | 1,141.5 | 1,140.5 | E    | 666.3   | 333.7 | 649.3   | 648.3   | 5   |
| 11  | 1,286.6 | 643.8 | 1,269.6 | 1,268.6 | K    | 537.3   | 269.2 | 520.3   | 519.3   | 4   |
| 12  | 1,433.7 | 717.3 | 1,416.6 | 1,415.7 | F    | 409.2   |       | 392.2   | 391.2   | 3   |
| 13  | 1,548.7 | 774.8 | 1,531.7 | 1,530.7 | D    | 262.1   |       | 245.1   | 244.1   | 2   |
| 14  | 1,694.8 | 847.9 | 1,677.8 | 1,676.8 | K    | 147.1   |       | 130.1   |         | 1   |

# Nuclear proteome

| Protein No. | Leading protein name | Sequence                     | Mascot Score | Variable Modifications | SILAC State | Charge | m/z       |
|-------------|----------------------|------------------------------|--------------|------------------------|-------------|--------|-----------|
| N-87        | sp O76024 WFS1_HUMAN | GVIPSSLFLQDDEDDDELAKSPEDLPLR | 50.5         | Unmodified             | Light       | 3      | 1057.5174 |

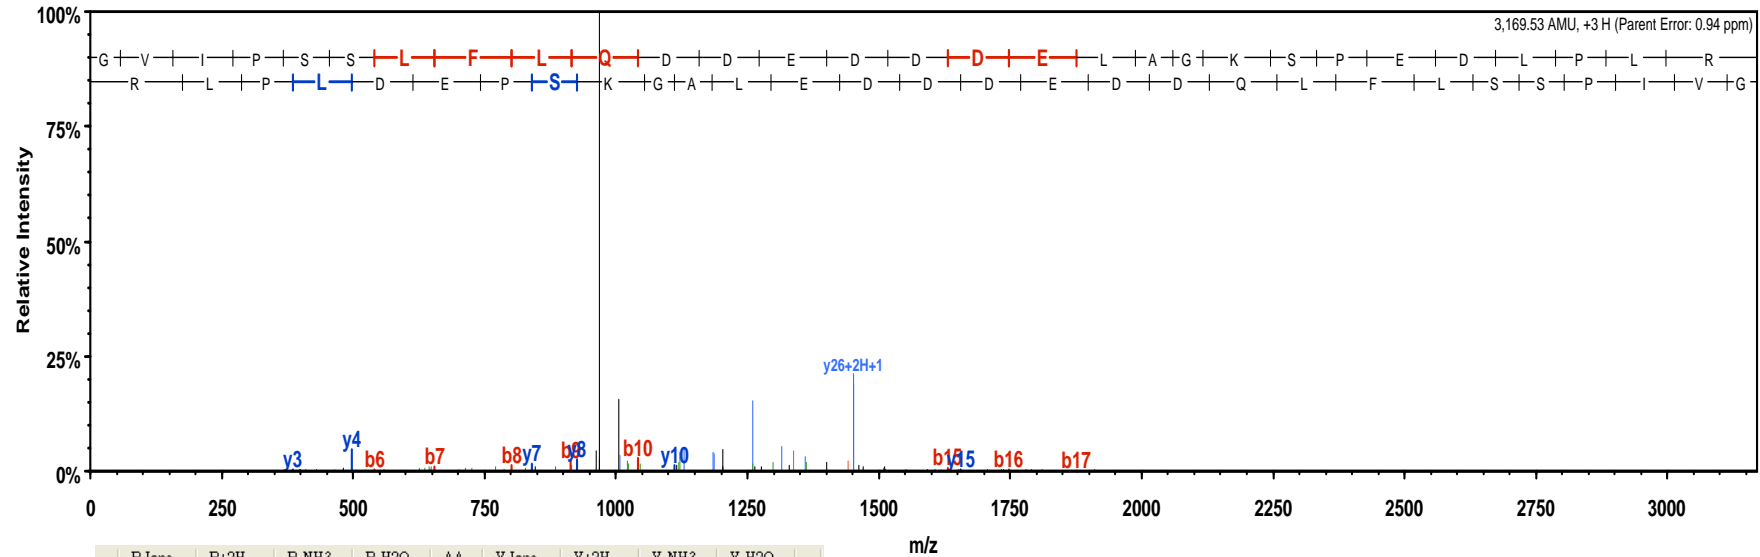

| ... | E Ions  | E+2H    | B-NH3   | B-H2O   | AA | Y Ions  | Y+2H    | Y-NH3   | Y-H2O   | ... |
|-----|---------|---------|---------|---------|----|---------|---------|---------|---------|-----|
| 1   | 58.0    |         |         |         | G  | 3,170.5 | 1,585.8 | 3,153.5 | 3,152.5 | 29  |
| 2   | 157.1   |         |         |         | V  | 3,113.5 | 1,557.3 | 3,096.5 | 3,095.5 | 28  |
| 3   | 270.2   |         |         |         | I  | 3,014.4 | 1,507.7 | 2,997.4 | 2,996.4 | 27  |
| 4   | 367.2   |         |         |         | P  | 2,901.4 | 1,451.2 | 2,884.3 | 2,883.4 | 26  |
| 5   | 454.3   |         |         | 436.3   | S  | 2,804.3 | 1,402.7 | 2,787.3 | 2,786.3 | 25  |
| 6   | 541.3   | 271.2   |         | 523.3   | S  | 2,717.3 | 1,359.1 | 2,700.3 | 2,699.3 | 24  |
| 7   | 654.4   | 327.7   |         | 636.4   | L  | 2,630.2 | 1,315.6 | 2,613.2 | 2,612.2 | 23  |
| 8   | 801.5   | 401.2   |         | 783.4   | F  | 2,517.2 | 1,259.1 | 2,500.1 | 2,499.2 | 22  |
| 9   | 914.5   | 457.8   |         | 896.5   | L  | 2,370.1 | 1,185.6 | 2,353.1 | 2,352.1 | 21  |
| 10  | 1,042.6 | 521.8   | 1,025.6 | 1,024.6 | Q  | 2,257.0 | 1,129.0 | 2,240.0 | 2,239.0 | 20  |
| 11  | 1,157.6 | 579.3   | 1,140.6 | 1,139.6 | D  | 2,129.0 | 1,065.0 | 2,111.9 | 2,110.9 | 19  |
| 12  | 1,272.6 | 636.8   | 1,255.6 | 1,254.6 | D  | 2,013.9 | 1,007.5 | 1,996.9 | 1,995.9 | 18  |
| 13  | 1,401.7 | 701.3   | 1,384.7 | 1,383.7 | E  | 1,898.9 | 950.0   | 1,881.9 | 1,880.9 | 17  |
| 14  | 1,516.7 | 758.9   | 1,499.7 | 1,498.7 | D  | 1,769.9 | 885.4   | 1,752.8 | 1,751.8 | 16  |
| 15  | 1,631.7 | 816.4   | 1,614.7 | 1,613.7 | D  | 1,654.8 | 827.9   | 1,637.8 | 1,636.8 | 15  |
| 16  | 1,746.8 | 873.9   | 1,729.7 | 1,728.8 | D  | 1,539.8 | 770.4   | 1,522.8 | 1,521.8 | 14  |
| 17  | 1,875.8 | 938.4   | 1,858.8 | 1,857.8 | E  | 1,424.8 | 712.9   | 1,407.7 | 1,406.8 | 13  |
| 18  | 1,988.9 | 995.0   | 1,971.9 | 1,970.9 | L  | 1,295.7 | 648.4   | 1,278.7 | 1,277.7 | 12  |
| 19  | 2,059.9 | 1,030.5 | 2,042.9 | 2,041.9 | A  | 1,182.6 | 591.8   | 1,165.6 | 1,164.6 | 11  |
| 20  | 2,117.0 | 1,059.0 | 2,099.9 | 2,098.9 | G  | 1,111.6 | 556.3   | 1,094.6 | 1,093.6 | 10  |
| 21  | 2,245.1 | 1,123.0 | 2,228.0 | 2,227.0 | K  | 1,054.6 | 527.8   | 1,037.6 | 1,036.6 | 9   |
| 22  | 2,332.1 | 1,166.5 | 2,315.1 | 2,314.1 | S  | 926.5   | 463.8   | 909.5   | 908.5   | 8   |
| 23  | 2,429.1 | 1,215.1 | 2,412.1 | 2,411.1 | P  | 839.5   | 420.2   | 822.4   | 821.5   | 7   |
| 24  | 2,558.2 | 1,279.6 | 2,541.2 | 2,540.2 | E  | 742.4   | 371.7   | 725.4   | 724.4   | 6   |
| 25  | 2,673.2 | 1,337.1 | 2,656.2 | 2,655.2 | D  | 613.4   |         | 596.3   | 595.4   | 5   |
| 26  | 2,786.3 | 1,393.6 | 2,769.3 | 2,768.3 | L  | 498.3   |         | 481.3   |         | 4   |
| 27  | 2,883.3 | 1,442.2 | 2,866.3 | 2,865.3 | P  | 385.3   |         | 368.2   |         | 3   |
| 28  | 2,996.4 | 1,498.7 | 2,979.4 | 2,978.4 | L  | 288.2   |         | 271.2   |         | 2   |
| 29  | 3,170.5 | 1,585.8 | 3,153.5 | 3,152.5 | R  | 175.1   |         | 158.1   |         | 1   |



# Nuclear proteome

| Protein No. | Leading protein name  | Sequence  | Mascot Score | Variable Modifications | SILAC State | Charge | m/z      |
|-------------|-----------------------|-----------|--------------|------------------------|-------------|--------|----------|
| N-88        | sp Q8TBQ9 T167A_HUMAN | TGLLGIFWK | 50.16        | Unmodified             | Heavy       | 2      | 517.8053 |

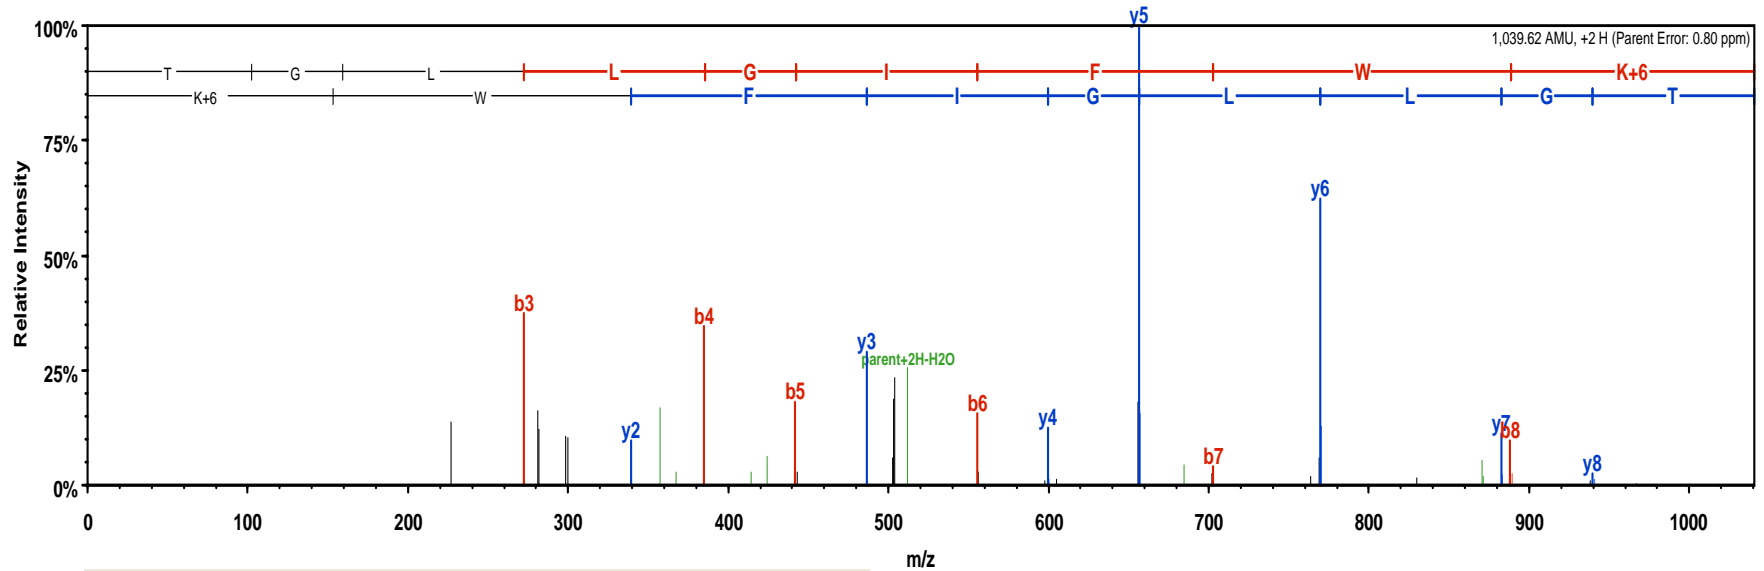

| ... | B Ions  | B+2H  | B-NH3   | B-H2O   | AA  | Y Ions  | Y+2H  | Y-NH3   | Y-H2O   | ... |
|-----|---------|-------|---------|---------|-----|---------|-------|---------|---------|-----|
| 1   | 102.1   |       |         | 84.0    | T   | 1,040.6 | 520.8 | 1,023.6 | 1,022.6 | 9   |
| 2   | 159.1   |       |         | 141.1   | G   | 939.6   | 470.3 | 922.5   |         | 8   |
| 3   | 272.2   |       |         | 254.2   | L   | 882.6   | 441.8 | 865.5   |         | 7   |
| 4   | 385.2   |       |         | 367.2   | L   | 769.5   | 385.2 | 752.4   |         | 6   |
| 5   | 442.3   |       |         | 424.3   | G   | 656.4   |       | 639.4   |         | 5   |
| 6   | 555.4   | 278.2 |         | 537.3   | I   | 599.4   |       | 582.3   |         | 4   |
| 7   | 702.4   | 351.7 |         | 684.4   | F   | 486.3   |       | 469.3   |         | 3   |
| 8   | 888.5   | 444.8 |         | 870.5   | W   | 339.2   |       | 322.2   |         | 2   |
| 9   | 1,040.6 | 520.8 | 1,023.6 | 1,022.6 | K+6 | 153.1   |       | 136.1   |         | 1   |

# Nuclear proteome

| Protein No. | Leading protein name | Sequence  | Mascot Score | Variable Modifications  | SILAC State | Charge | m/z       |
|-------------|----------------------|-----------|--------------|-------------------------|-------------|--------|-----------|
| N-89        | sp Q8NCE0ISEN2_HUMAN | AEAVFHAPK | 48.01        | Acetyl (Protein N-term) | Heavy       | 2      | 506.26654 |

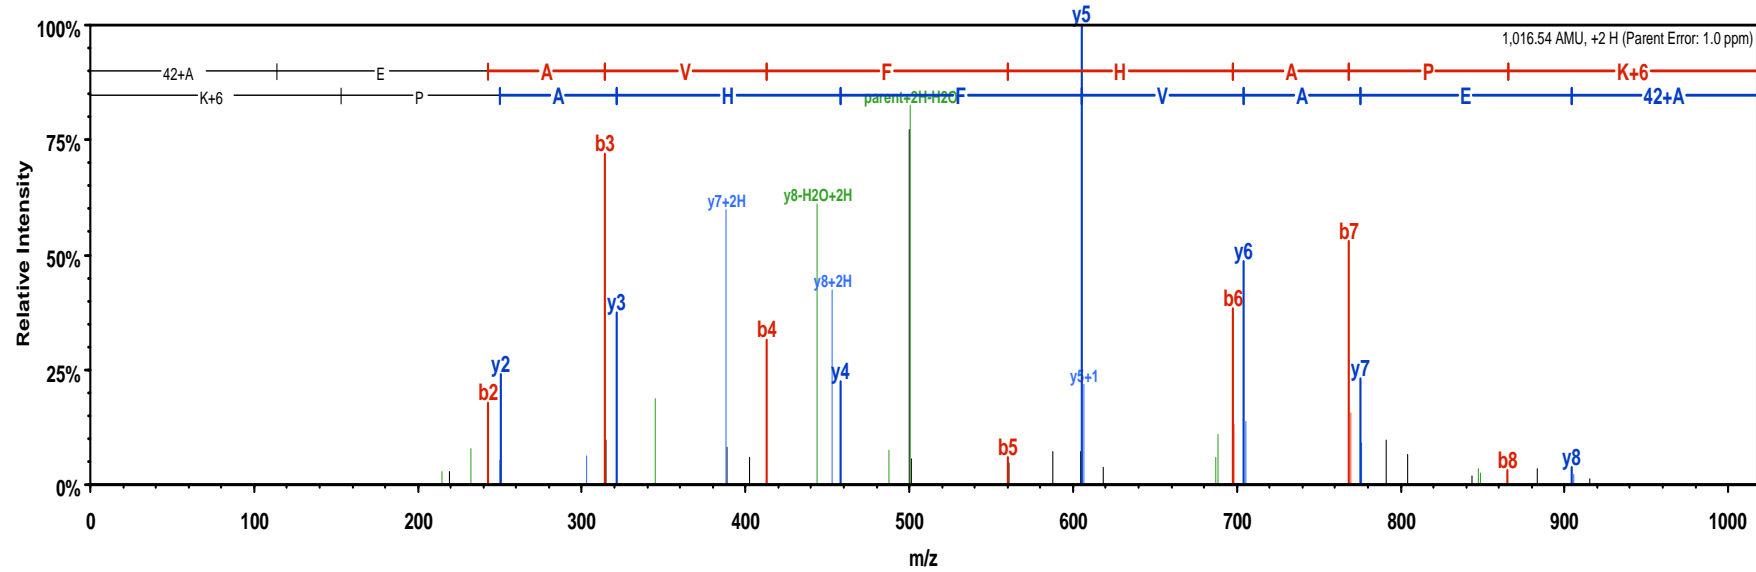

| ... | B Ions  | B+2H  | B-NH3   | B-H2O | AA   | Y Ions  | Y+2H  | Y-NH3   | Y-H2O | ... |
|-----|---------|-------|---------|-------|------|---------|-------|---------|-------|-----|
| 1   | 114.1   |       |         |       | A+42 | 1,017.5 | 509.3 | 1,000.5 | 999.5 | 9   |
| 2   | 243.1   |       |         | 225.1 | E    | 904.5   | 452.8 | 887.5   | 886.5 | 8   |
| 3   | 314.1   |       |         | 296.1 | A    | 775.5   | 388.2 | 758.4   |       | 7   |
| 4   | 413.2   |       |         | 395.2 | V    | 704.4   | 352.7 | 687.4   |       | 6   |
| 5   | 560.3   |       |         | 542.3 | F    | 605.4   | 303.2 | 588.3   |       | 5   |
| 6   | 697.3   | 349.2 |         | 679.3 | H    | 458.3   | 229.6 | 441.3   |       | 4   |
| 7   | 768.4   | 384.7 |         | 750.4 | A    | 321.2   |       | 304.2   |       | 3   |
| 8   | 865.4   | 433.2 |         | 847.4 | P    | 250.2   |       | 233.2   |       | 2   |
| 9   | 1,017.5 | 509.3 | 1,000.5 | 999.5 | K+6  | 153.1   |       | 136.1   |       | 1   |

# Nuclear proteome

| Protein No. | Leading protein name | Sequence     | Mascot Score | Variable Modifications  | SILAC State | Charge | m/z       |
|-------------|----------------------|--------------|--------------|-------------------------|-------------|--------|-----------|
| N-90        | splQ9Y281COF2_HUMAN  | ASGVTVNDEVIK | 47.76        | Acetyl (Protein N-term) | Light       | 2      | 637.33535 |

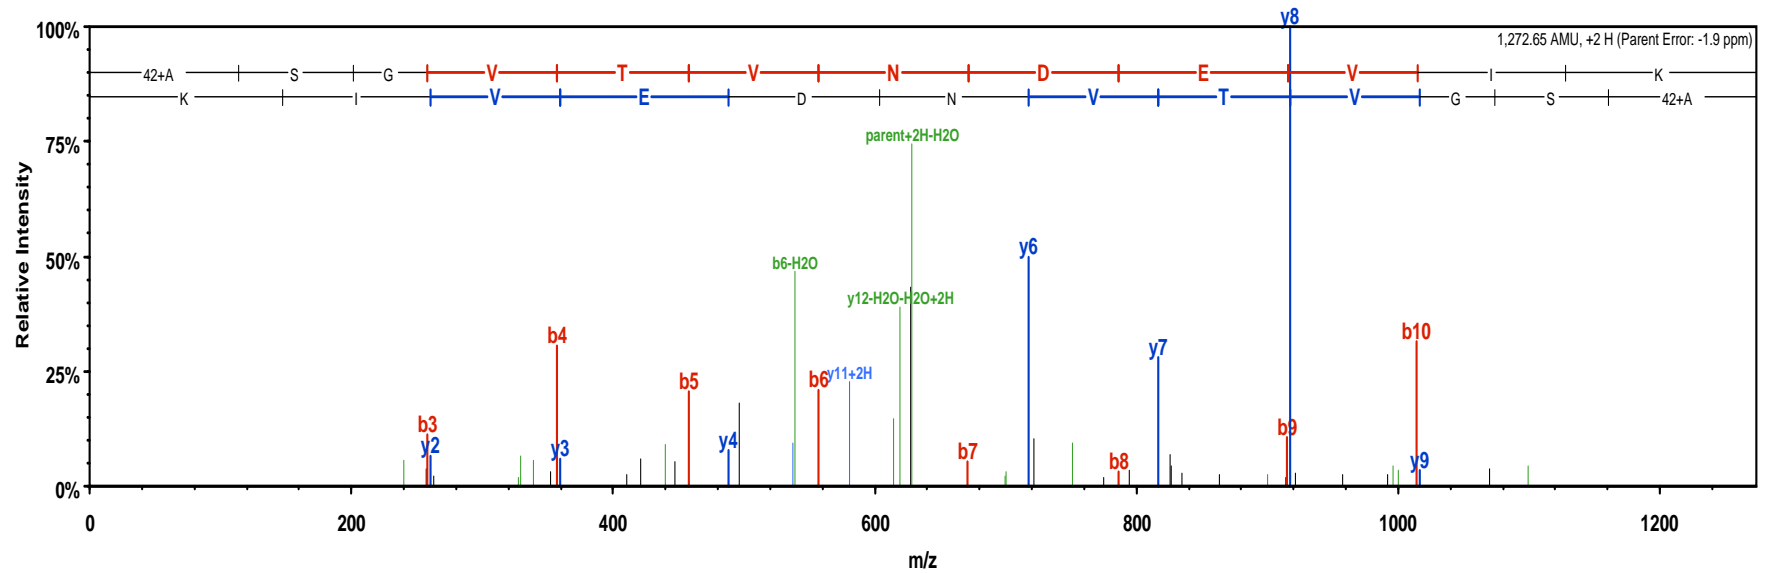

| ... | B Ions  | B+2H  | B-NH3   | B-H2O   | AA   | Y Ions  | Y+2H  | Y-NH3   | Y-H2O   | ... |
|-----|---------|-------|---------|---------|------|---------|-------|---------|---------|-----|
| 1   | 114.1   |       |         |         | A+42 | 1,273.7 | 637.3 | 1,256.6 | 1,255.7 | 12  |
| 2   | 201.1   |       |         | 183.1   | S    | 1,160.6 | 580.8 | 1,143.6 | 1,142.6 | 11  |
| 3   | 258.1   |       |         | 240.1   | G    | 1,073.6 | 537.3 | 1,056.6 | 1,055.6 | 10  |
| 4   | 357.2   |       |         | 339.2   | V    | 1,016.6 | 508.8 | 999.5   | 998.6   | 9   |
| 5   | 458.2   |       |         | 440.2   | T    | 917.5   | 459.3 | 900.5   | 899.5   | 8   |
| 6   | 557.3   | 279.2 |         | 539.3   | V    | 816.4   | 408.7 | 799.4   | 798.4   | 7   |
| 7   | 671.3   | 336.2 | 654.3   | 653.3   | N    | 717.4   | 359.2 | 700.4   | 699.4   | 6   |
| 8   | 786.4   | 393.7 | 769.3   | 768.4   | D    | 603.3   |       | 586.3   | 585.3   | 5   |
| 9   | 915.4   | 458.2 | 898.4   | 897.4   | E    | 488.3   |       | 471.3   | 470.3   | 4   |
| 10  | 1,014.5 | 507.7 | 997.4   | 996.5   | V    | 359.3   |       | 342.2   |         | 3   |
| 11  | 1,127.6 | 564.3 | 1,110.5 | 1,109.5 | I    | 260.2   |       | 243.2   |         | 2   |
| 12  | 1,273.7 | 637.3 | 1,256.6 | 1,255.7 | K    | 147.1   |       | 130.1   |         | 1   |

# Nuclear proteome

| Protein No. | Leading protein name  | Sequence      | Mascot Score | Variable Modifications | SILAC State | Charge | m/z       |
|-------------|-----------------------|---------------|--------------|------------------------|-------------|--------|-----------|
| N-91        | sp Q9BTL3 F103A_HUMAN | FTENDKEYQEYLK | 47.4         | Unmodified             | Light       | 2      | 853.89904 |

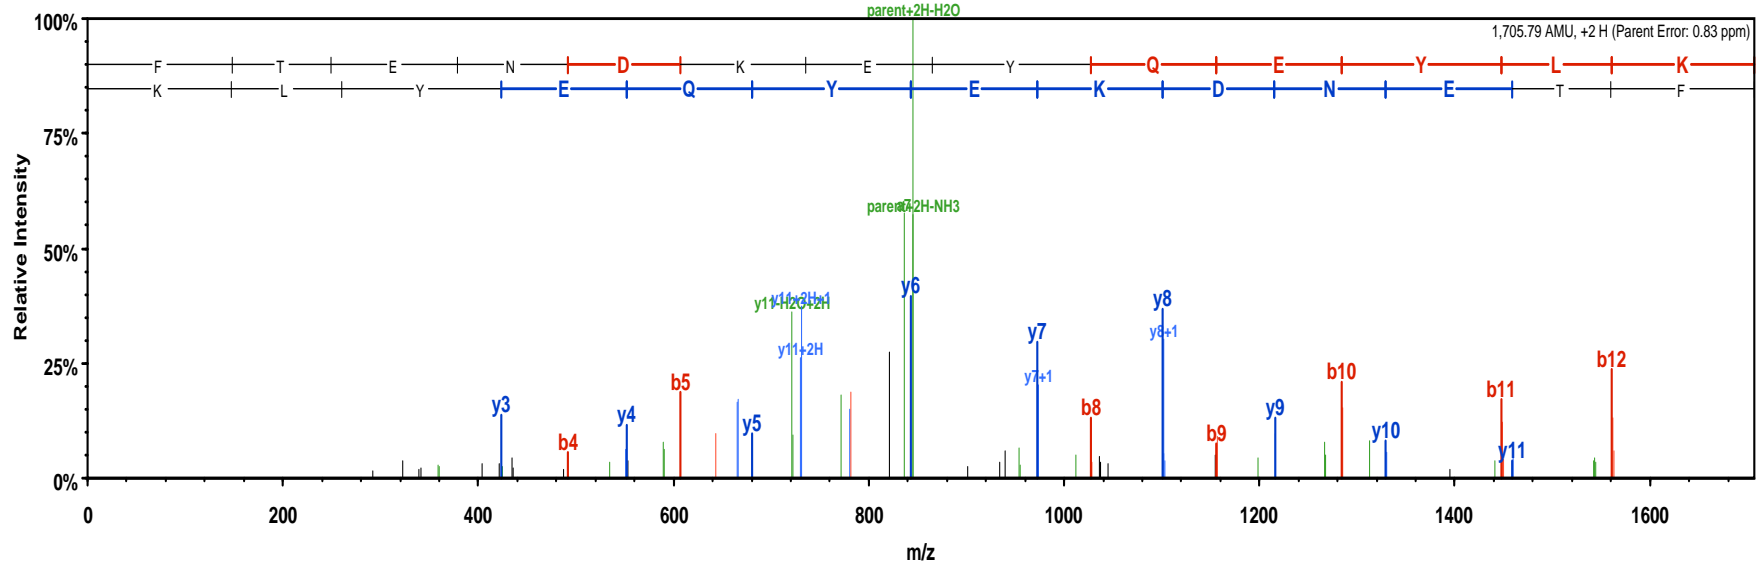

| ... | B Ions  | B+2H  | B-NH3   | B-H2O   | AA | Y Ions  | Y+2H  | Y-NH3   | Y-H2O   | ... |
|-----|---------|-------|---------|---------|----|---------|-------|---------|---------|-----|
| 1   | 148.1   |       |         |         | F  | 1,706.8 | 853.9 | 1,689.8 | 1,688.8 | 13  |
| 2   | 249.1   |       |         | 231.1   | T  | 1,559.7 | 780.4 | 1,542.7 | 1,541.7 | 12  |
| 3   | 378.2   |       |         | 360.2   | E  | 1,458.7 | 729.8 | 1,441.6 | 1,440.7 | 11  |
| 4   | 492.2   |       | 475.2   | 474.2   | N  | 1,329.6 | 665.3 | 1,312.6 | 1,311.6 | 10  |
| 5   | 607.2   |       | 590.2   | 589.2   | D  | 1,215.6 | 608.3 | 1,198.6 | 1,197.6 | 9   |
| 6   | 735.3   | 368.2 | 718.3   | 717.3   | K  | 1,100.6 | 550.8 | 1,083.5 | 1,082.6 | 8   |
| 7   | 864.4   | 432.7 | 847.3   | 846.4   | E  | 972.5   | 486.7 | 955.4   | 954.5   | 7   |
| 8   | 1,027.4 | 514.2 | 1,010.4 | 1,009.4 | Y  | 843.4   | 422.2 | 826.4   | 825.4   | 6   |
| 9   | 1,155.5 | 578.3 | 1,138.5 | 1,137.5 | Q  | 680.4   |       | 663.3   | 662.4   | 5   |
| 10  | 1,284.5 | 642.8 | 1,267.5 | 1,266.5 | E  | 552.3   |       | 535.3   | 534.3   | 4   |
| 11  | 1,447.6 | 724.3 | 1,430.6 | 1,429.6 | Y  | 423.3   |       | 406.2   |         | 3   |
| 12  | 1,560.7 | 780.8 | 1,543.7 | 1,542.7 | L  | 260.2   |       | 243.2   |         | 2   |
| 13  | 1,706.8 | 853.9 | 1,689.8 | 1,688.8 | K  | 147.1   |       | 130.1   |         | 1   |

# Nuclear proteome

| Protein No. | Leading protein name | Sequence      | Mascot Score | Variable Modifications | SILAC State | Charge | m/z      |
|-------------|----------------------|---------------|--------------|------------------------|-------------|--------|----------|
| N-92        | spIP63000RAC1_HUMAN  | HHCPNTPILVGTK | 37.04        | Unmodified             | Light       | 2      | 793.9274 |

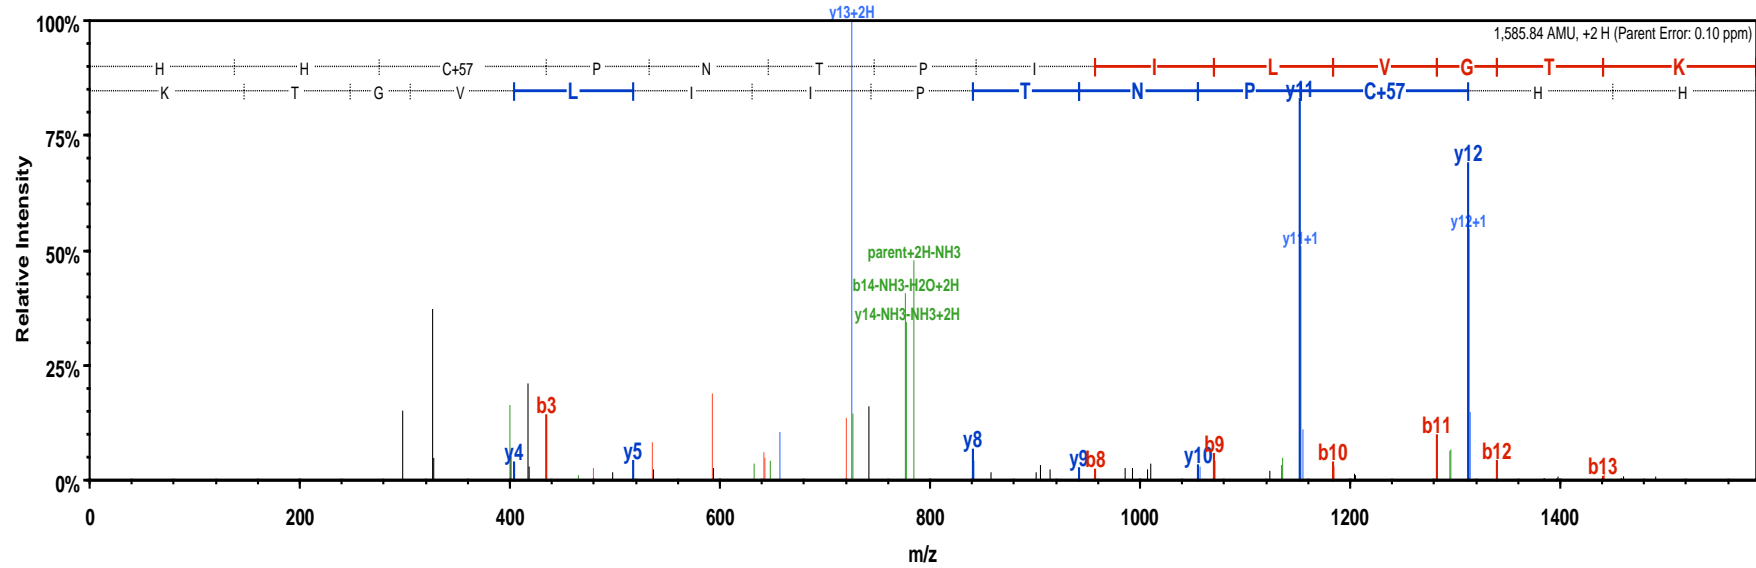

| ... | B Ions  | B+2H  | B-NH3   | B-H2O   | AA   | Y Ions  | Y+2H  | Y-NH3   | Y-H2O   | ... |
|-----|---------|-------|---------|---------|------|---------|-------|---------|---------|-----|
| 1   | 138.1   | 69.5  |         |         | H    | 1,586.8 | 793.9 | 1,569.8 | 1,568.8 | 14  |
| 2   | 275.1   | 138.1 |         |         | H    | 1,449.8 | 725.4 | 1,432.8 | 1,431.8 | 13  |
| 3   | 435.2   | 218.1 |         |         | C+57 | 1,312.7 | 656.9 | 1,295.7 | 1,294.7 | 12  |
| 4   | 532.2   | 266.6 |         |         | P    | 1,152.7 | 576.9 | 1,135.7 | 1,134.7 | 11  |
| 5   | 646.3   | 323.6 | 629.2   |         | N    | 1,055.6 | 528.3 | 1,038.6 | 1,037.6 | 10  |
| 6   | 747.3   | 374.2 | 730.3   | 729.3   | T    | 941.6   | 471.3 | 924.6   | 923.6   | 9   |
| 7   | 844.4   | 422.7 | 827.3   | 826.3   | P    | 840.6   | 420.8 | 823.5   | 822.5   | 8   |
| 8   | 957.4   | 479.2 | 940.4   | 939.4   | I    | 743.5   | 372.3 | 726.5   | 725.5   | 7   |
| 9   | 1,070.5 | 535.8 | 1,053.5 | 1,052.5 | I    | 630.4   | 315.7 | 613.4   | 612.4   | 6   |
| 10  | 1,183.6 | 592.3 | 1,166.6 | 1,165.6 | L    | 517.3   |       | 500.3   | 499.3   | 5   |
| 11  | 1,282.7 | 641.8 | 1,265.6 | 1,264.7 | V    | 404.3   |       | 387.2   | 386.2   | 4   |
| 12  | 1,339.7 | 670.4 | 1,322.7 | 1,321.7 | G    | 305.2   |       | 288.2   | 287.2   | 3   |
| 13  | 1,440.7 | 720.9 | 1,423.7 | 1,422.7 | T    | 248.2   |       | 231.1   | 230.1   | 2   |
| 14  | 1,586.8 | 793.9 | 1,569.8 | 1,568.8 | K    | 147.1   |       | 130.1   |         | 1   |

# Nuclear proteome

| Protein No. | Leading protein name  | Sequence                 | Mascot Score | Variable Modifications | SILAC State | Charge | m/z       |
|-------------|-----------------------|--------------------------|--------------|------------------------|-------------|--------|-----------|
| N-93        | spIQ9BQE3ITBA1C_HUMAN | AYHEQLTVAEITNACFEPANQMVK | 47.09        | Unmodified             | Light       | 3      | 922.10715 |

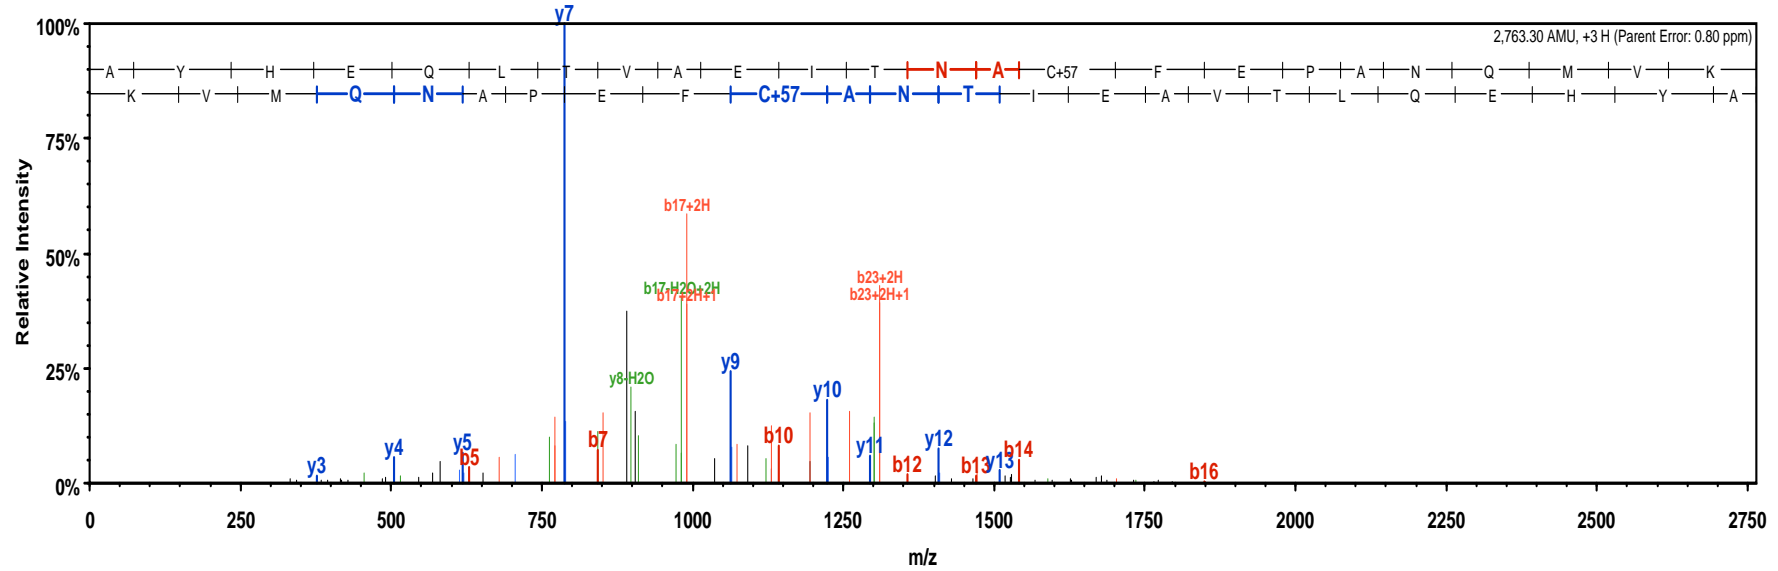

| ... | B Ions  | B+2H    | B-NH3   | B-H2O   | AA   | Y Ions  | Y+2H    | Y-NH3   | Y-H2O   | ... |
|-----|---------|---------|---------|---------|------|---------|---------|---------|---------|-----|
| 1   | 72.0    |         |         |         | A    | 2,764.3 | 1,382.7 | 2,747.3 | 2,746.3 | 24  |
| 2   | 235.1   |         |         |         | Y    | 2,693.3 | 1,347.1 | 2,676.2 | 2,675.3 | 23  |
| 3   | 372.2   | 186.6   |         |         | H    | 2,530.2 | 1,265.6 | 2,513.2 | 2,512.2 | 22  |
| 4   | 501.2   | 251.1   |         | 483.2   | E    | 2,393.1 | 1,197.1 | 2,376.1 | 2,375.1 | 21  |
| 5   | 629.3   | 315.1   | 612.2   | 611.3   | Q    | 2,264.1 | 1,132.6 | 2,247.1 | 2,246.1 | 20  |
| 6   | 742.4   | 371.7   | 725.3   | 724.3   | L    | 2,136.0 | 1,068.5 | 2,119.0 | 2,118.0 | 19  |
| 7   | 843.4   | 422.2   | 826.4   | 825.4   | T    | 2,023.0 | 1,012.0 | 2,005.9 | 2,005.0 | 18  |
| 8   | 942.5   | 471.7   | 925.4   | 924.5   | V    | 1,921.9 | 961.5   | 1,904.9 | 1,903.9 | 17  |
| 9   | 1,013.5 | 507.3   | 996.5   | 995.5   | A    | 1,822.8 | 911.9   | 1,805.8 | 1,804.8 | 16  |
| 10  | 1,142.5 | 571.8   | 1,125.5 | 1,124.5 | E    | 1,751.8 | 876.4   | 1,734.8 | 1,733.8 | 15  |
| 11  | 1,255.6 | 628.3   | 1,238.6 | 1,237.6 | I    | 1,622.8 | 811.9   | 1,605.7 | 1,604.8 | 14  |
| 12  | 1,356.7 | 678.8   | 1,339.7 | 1,338.7 | T    | 1,509.7 | 755.3   | 1,492.7 | 1,491.7 | 13  |
| 13  | 1,470.7 | 735.9   | 1,453.7 | 1,452.7 | N    | 1,408.6 | 704.8   | 1,391.6 | 1,390.6 | 12  |
| 14  | 1,541.8 | 771.4   | 1,524.7 | 1,523.7 | A    | 1,294.6 | 647.8   | 1,277.6 | 1,276.6 | 11  |
| 15  | 1,701.8 | 851.4   | 1,684.8 | 1,683.8 | C+57 | 1,223.6 | 612.3   | 1,206.5 | 1,205.5 | 10  |
| 16  | 1,848.9 | 924.9   | 1,831.8 | 1,830.8 | F    | 1,063.5 | 532.3   | 1,046.5 | 1,045.5 | 9   |
| 17  | 1,977.9 | 989.5   | 1,960.9 | 1,959.9 | E    | 916.5   | 458.7   | 899.4   | 898.4   | 8   |
| 18  | 2,075.0 | 1,038.0 | 2,057.9 | 2,056.9 | P    | 787.4   | 394.2   | 770.4   |         | 7   |
| 19  | 2,146.0 | 1,073.5 | 2,129.0 | 2,128.0 | A    | 690.4   | 345.7   | 673.3   |         | 6   |
| 20  | 2,260.0 | 1,130.5 | 2,243.0 | 2,242.0 | N    | 619.3   |         | 602.3   |         | 5   |
| 21  | 2,388.1 | 1,194.5 | 2,371.1 | 2,370.1 | Q    | 505.3   |         | 488.3   |         | 4   |
| 22  | 2,519.1 | 1,260.1 | 2,502.1 | 2,501.1 | M    | 377.2   |         | 360.2   |         | 3   |
| 23  | 2,618.2 | 1,309.6 | 2,601.2 | 2,600.2 | V    | 246.2   |         | 229.2   |         | 2   |
| 24  | 2,764.3 | 1,382.7 | 2,747.3 | 2,746.3 | K    | 147.1   |         | 130.1   |         | 1   |

# Nuclear proteome

| Protein No. | Leading protein name  | Sequence                  | Mascot Score | Variable Modifications | SILAC State | Charge | m/z       |
|-------------|-----------------------|---------------------------|--------------|------------------------|-------------|--------|-----------|
| N-94        | sp Q99584 S10AD_HUMAN | ELVTQQLP <sup>H</sup> LLK | 46.64        | Unmodified             | Light       | 2      | 709.92193 |

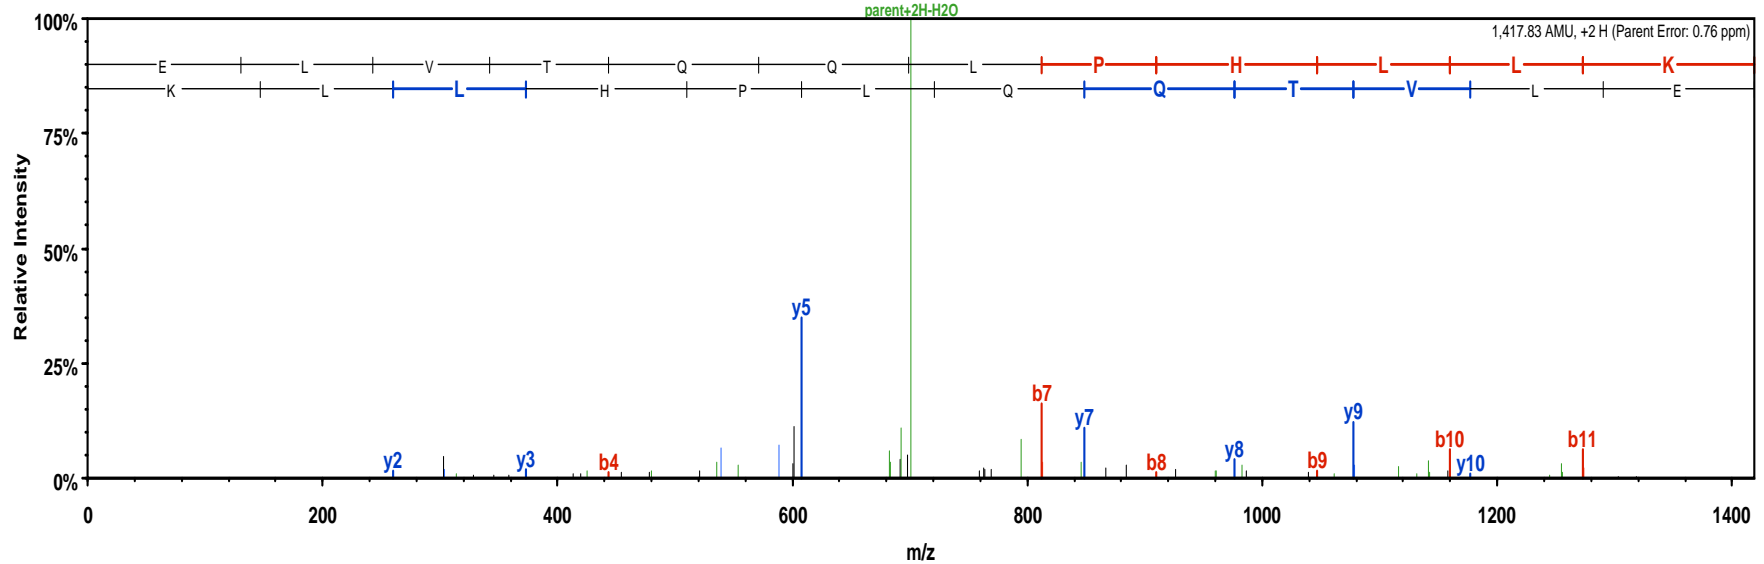

| ... | B Ions  | B+2H  | B-NH3   | B-H2O   | AA | Y Ions  | Y+2H  | Y-NH3   | Y-H2O   | ... |
|-----|---------|-------|---------|---------|----|---------|-------|---------|---------|-----|
| 1   | 130.0   |       |         | 112.0   | E  | 1,418.8 | 709.9 | 1,401.8 | 1,400.8 | 12  |
| 2   | 243.1   |       |         | 225.1   | L  | 1,289.8 | 645.4 | 1,272.8 | 1,271.8 | 11  |
| 3   | 342.2   |       |         | 324.2   | V  | 1,176.7 | 588.9 | 1,159.7 | 1,158.7 | 10  |
| 4   | 443.3   |       |         | 425.2   | T  | 1,077.6 | 539.3 | 1,060.6 | 1,059.6 | 9   |
| 5   | 571.3   |       | 554.3   | 553.3   | Q  | 976.6   | 488.8 | 959.6   |         | 8   |
| 6   | 699.4   | 350.2 | 682.3   | 681.4   | Q  | 848.5   | 424.8 | 831.5   |         | 7   |
| 7   | 812.5   | 406.7 | 795.4   | 794.4   | L  | 720.5   | 360.7 | 703.5   |         | 6   |
| 8   | 909.5   | 455.3 | 892.5   | 891.5   | P  | 607.4   | 304.2 | 590.4   |         | 5   |
| 9   | 1,046.6 | 523.8 | 1,029.5 | 1,028.6 | H  | 510.3   | 255.7 | 493.3   |         | 4   |
| 10  | 1,159.6 | 580.3 | 1,142.6 | 1,141.6 | L  | 373.3   |       | 356.3   |         | 3   |
| 11  | 1,272.7 | 636.9 | 1,255.7 | 1,254.7 | L  | 260.2   |       | 243.2   |         | 2   |
| 12  | 1,418.8 | 709.9 | 1,401.8 | 1,400.8 | K  | 147.1   |       | 130.1   |         | 1   |

# Nuclear proteome

| Protein No. | Leading protein name  | Sequence        | Mascot Score | Variable Modifications  | SILAC State | Charge | m/z       |
|-------------|-----------------------|-----------------|--------------|-------------------------|-------------|--------|-----------|
| N-95        | sp O60518 RNBP6_HUMAN | AATASAGVPATVSEK | 46.4         | Acetyl (Protein N-term) | Heavy       | 2      | 701.36464 |

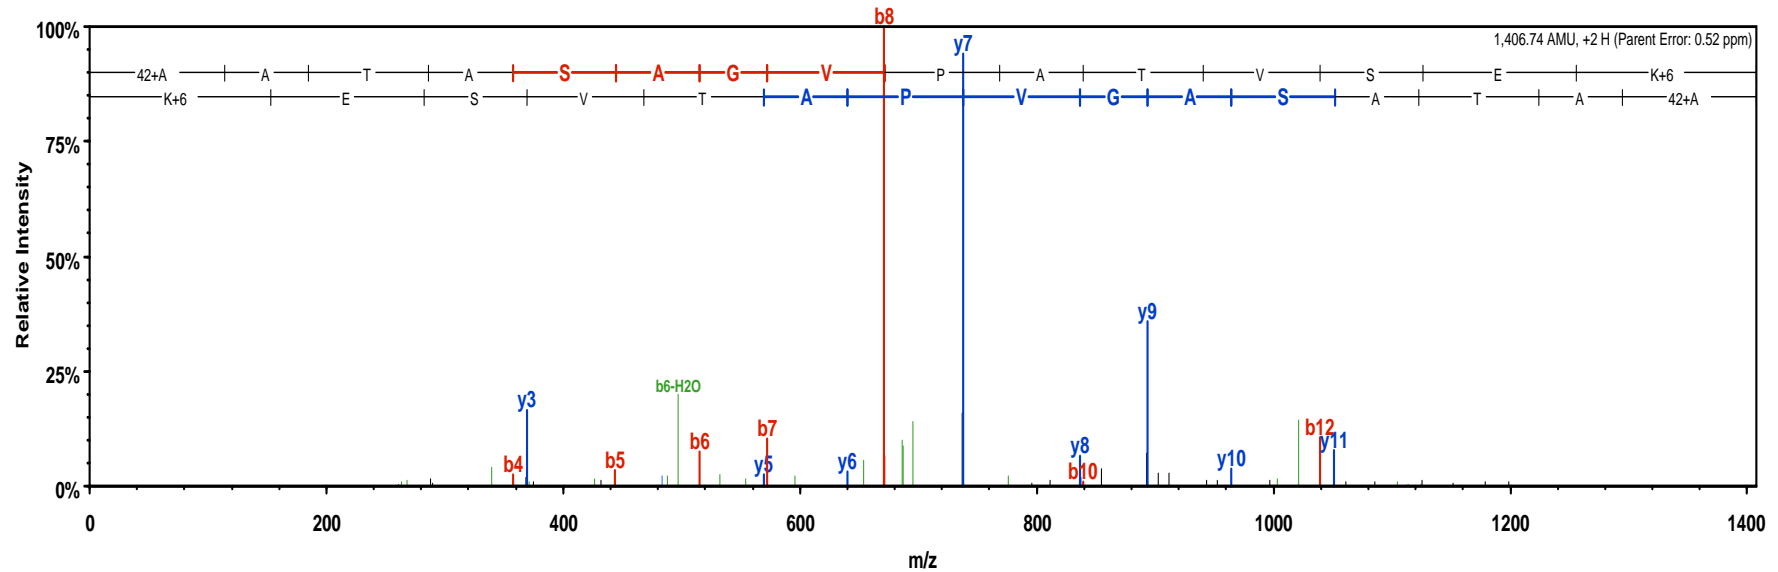

| ... | B Ions  | B+2H  | B-NH3   | B-H2O   | AA   | Y Ions  | Y+2H  | Y-NH3   | Y-H2O   | ... |
|-----|---------|-------|---------|---------|------|---------|-------|---------|---------|-----|
| 1   | 114.1   |       |         |         | A+42 | 1,407.7 | 704.4 | 1,390.7 | 1,389.7 | 15  |
| 2   | 185.1   |       |         |         | A    | 1,294.7 | 647.9 | 1,277.7 | 1,276.7 | 14  |
| 3   | 286.1   |       |         | 268.1   | T    | 1,223.7 | 612.3 | 1,206.6 | 1,205.6 | 13  |
| 4   | 357.2   |       |         | 339.2   | A    | 1,122.6 | 561.8 | 1,105.6 | 1,104.6 | 12  |
| 5   | 444.2   |       |         | 426.2   | S    | 1,051.6 | 526.3 | 1,034.5 | 1,033.6 | 11  |
| 6   | 515.2   | 258.1 |         | 497.2   | A    | 964.5   | 482.8 | 947.5   | 946.5   | 10  |
| 7   | 572.3   | 286.6 |         | 554.3   | G    | 893.5   | 447.3 | 876.5   | 875.5   | 9   |
| 8   | 671.3   | 336.2 |         | 653.3   | V    | 836.5   | 418.7 | 819.5   | 818.5   | 8   |
| 9   | 768.4   | 384.7 |         | 750.4   | P    | 737.4   | 369.2 | 720.4   | 719.4   | 7   |
| 10  | 839.4   | 420.2 |         | 821.4   | A    | 640.4   | 320.7 | 623.3   | 622.4   | 6   |
| 11  | 940.5   | 470.7 |         | 922.5   | T    | 569.3   |       | 552.3   | 551.3   | 5   |
| 12  | 1,039.5 | 520.3 |         | 1,021.5 | V    | 468.3   |       | 451.2   | 450.3   | 4   |
| 13  | 1,126.6 | 563.8 |         | 1,108.6 | S    | 369.2   |       | 352.2   | 351.2   | 3   |
| 14  | 1,255.6 | 628.3 |         | 1,237.6 | E    | 282.2   |       | 265.1   | 264.2   | 2   |
| 15  | 1,407.7 | 704.4 | 1,390.7 | 1,389.7 | K+6  | 153.1   |       | 136.1   |         | 1   |



# Nuclear proteome

| Protein No. | Leading protein name  | Sequence    | Mascot Score | Variable Modifications  | SILAC State | Charge | m/z       |
|-------------|-----------------------|-------------|--------------|-------------------------|-------------|--------|-----------|
| N-96        | sp Q9Y277 VDAC3_HUMAN | CNTPTYCDLGK | 45.65        | Acetyl (Protein N-term) | Heavy       | 2      | 685.78939 |

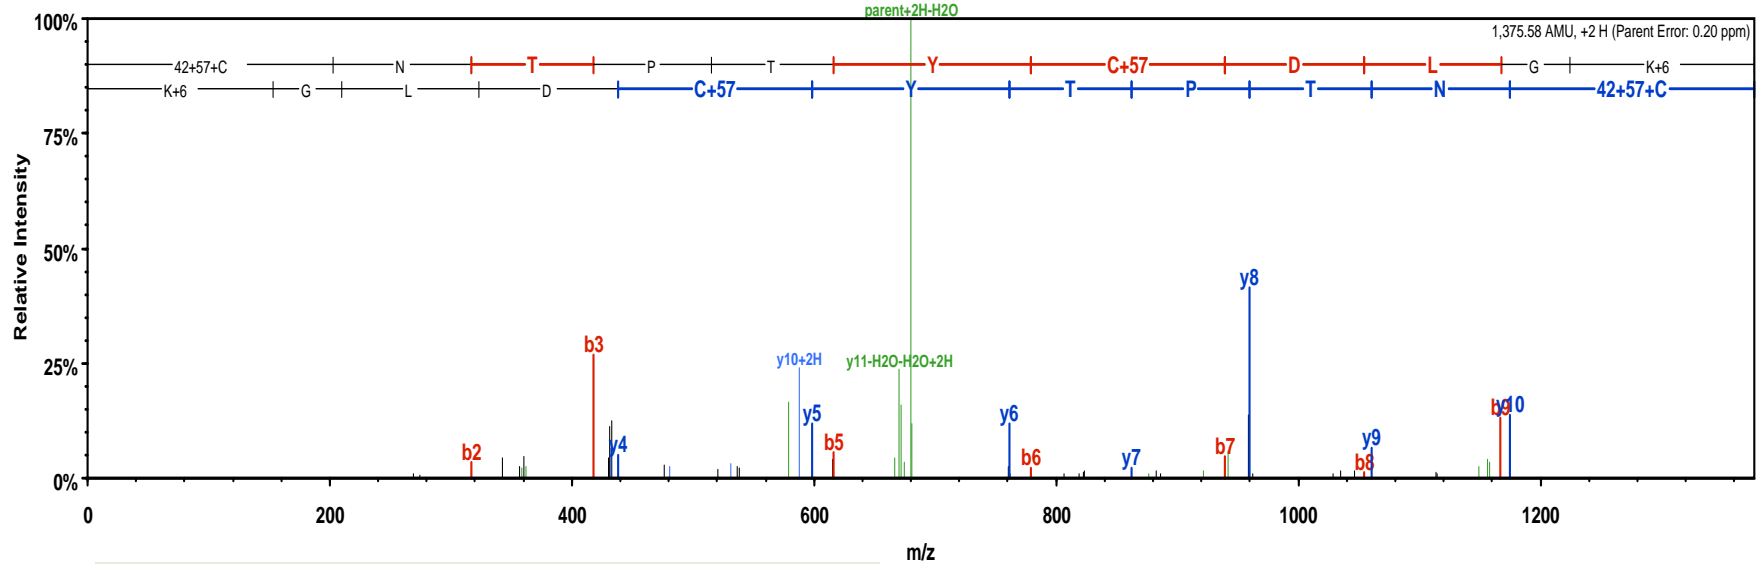

| ... | B Ions  | B+2H  | B-NH3   | B-H2O   | AA   | Y Ions  | Y+2H  | Y-NH3   | Y-H2O   | ... |
|-----|---------|-------|---------|---------|------|---------|-------|---------|---------|-----|
| 1   | 203.0   |       |         |         | C+99 | 1,376.6 | 688.8 | 1,359.6 | 1,358.6 | 11  |
| 2   | 317.1   |       | 300.1   |         | N    | 1,174.6 | 587.8 | 1,157.5 | 1,156.5 | 10  |
| 3   | 418.1   |       | 401.1   | 400.1   | T    | 1,060.5 | 530.8 | 1,043.5 | 1,042.5 | 9   |
| 4   | 515.2   |       | 498.2   | 497.2   | P    | 959.5   | 480.2 | 942.4   | 941.4   | 8   |
| 5   | 616.2   |       | 599.2   | 598.2   | T    | 862.4   | 431.7 | 845.4   | 844.4   | 7   |
| 6   | 779.3   | 390.2 | 762.3   | 761.3   | Y    | 761.4   | 381.2 | 744.3   | 743.3   | 6   |
| 7   | 939.3   | 470.2 | 922.3   | 921.3   | C+57 | 598.3   |       | 581.3   | 580.3   | 5   |
| 8   | 1,054.4 | 527.7 | 1,037.3 | 1,036.3 | D    | 438.3   |       | 421.2   | 420.3   | 4   |
| 9   | 1,167.4 | 584.2 | 1,150.4 | 1,149.4 | L    | 323.2   |       | 306.2   |         | 3   |
| 10  | 1,224.5 | 612.7 | 1,207.4 | 1,206.5 | G    | 210.2   |       | 193.1   |         | 2   |
| 11  | 1,376.6 | 688.8 | 1,359.6 | 1,358.6 | K+6  | 153.1   |       | 136.1   |         | 1   |

# Nuclear proteome

| Protein No. | Leading protein name   | Sequence         | Mascot Score | Variable Modifications | SILAC State | Charge | m/z       |
|-------------|------------------------|------------------|--------------|------------------------|-------------|--------|-----------|
| N-97        | sp Q56NI9 IESCO2_HUMAN | SEVIEDSDVETVSEKK | 44.81        | Unmodified             | Light       | 2      | 897.43619 |

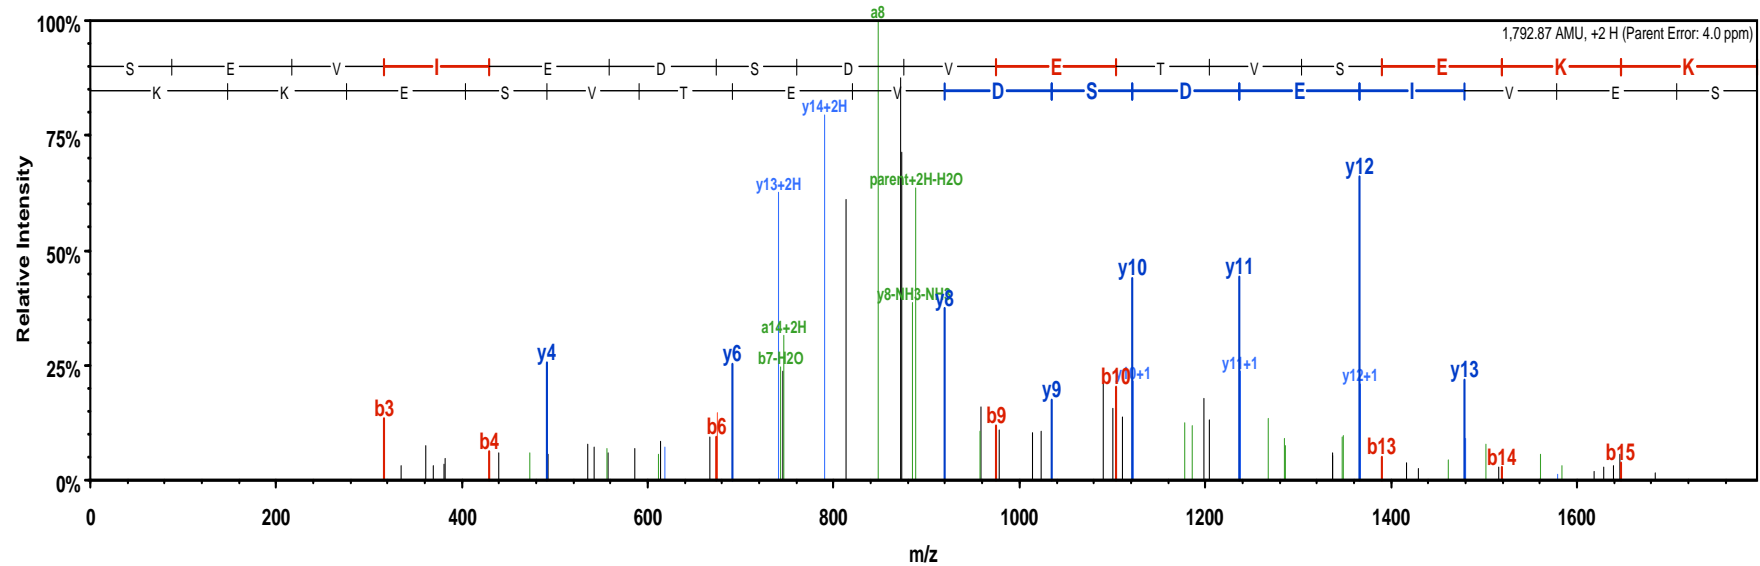

| ... | B Ions  | B+2H  | B-NH3   | B-H2O   | AA | Y Ions  | Y+2H  | Y-NH3   | Y-H2O   | ... |
|-----|---------|-------|---------|---------|----|---------|-------|---------|---------|-----|
| 1   | 88.0    |       |         | 70.0    | S  | 1,793.9 | 897.4 | 1,776.8 | 1,775.9 | 16  |
| 2   | 217.1   |       |         | 199.1   | E  | 1,706.8 | 853.9 | 1,689.8 | 1,688.8 | 15  |
| 3   | 316.2   |       |         | 298.1   | V  | 1,577.8 | 789.4 | 1,560.8 | 1,559.8 | 14  |
| 4   | 429.2   |       |         | 411.2   | I  | 1,478.7 | 739.9 | 1,461.7 | 1,460.7 | 13  |
| 5   | 558.3   |       |         | 540.3   | E  | 1,365.6 | 683.3 | 1,348.6 | 1,347.6 | 12  |
| 6   | 673.3   | 337.2 |         | 655.3   | D  | 1,236.6 | 618.8 | 1,219.6 | 1,218.6 | 11  |
| 7   | 760.3   | 380.7 |         | 742.3   | S  | 1,121.6 | 561.3 | 1,104.5 | 1,103.6 | 10  |
| 8   | 875.4   | 438.2 |         | 857.4   | D  | 1,034.5 | 517.8 | 1,017.5 | 1,016.5 | 9   |
| 9   | 974.4   | 487.7 |         | 956.4   | V  | 919.5   | 460.3 | 902.5   | 901.5   | 8   |
| 10  | 1,103.5 | 552.2 |         | 1,085.5 | E  | 820.4   | 410.7 | 803.4   | 802.4   | 7   |
| 11  | 1,204.5 | 602.8 |         | 1,186.5 | T  | 691.4   | 346.2 | 674.4   | 673.4   | 6   |
| 12  | 1,303.6 | 652.3 |         | 1,285.6 | V  | 590.4   | 295.7 | 573.3   | 572.3   | 5   |
| 13  | 1,390.6 | 695.8 |         | 1,372.6 | S  | 491.3   | 246.1 | 474.3   | 473.3   | 4   |
| 14  | 1,519.7 | 760.3 |         | 1,501.7 | E  | 404.3   | 202.6 | 387.2   | 386.2   | 3   |
| 15  | 1,647.8 | 824.4 | 1,630.7 | 1,629.7 | K  | 275.2   | 138.1 | 258.2   |         | 2   |
| 16  | 1,793.9 | 897.4 | 1,776.8 | 1,775.9 | K  | 147.1   |       | 130.1   |         | 1   |

# Nuclear proteome

| Protein No. | Leading protein name | Sequence          | Mascot Score | Variable Modifications | SILAC State | Charge | m/z       |
|-------------|----------------------|-------------------|--------------|------------------------|-------------|--------|-----------|
| N-98        | sp Q9NWA0 MED9_HUMAN | CMDKDSPEVHQDLNALK | 44.77        | Unmodified             | Heavy       | 2      | 1000.4642 |

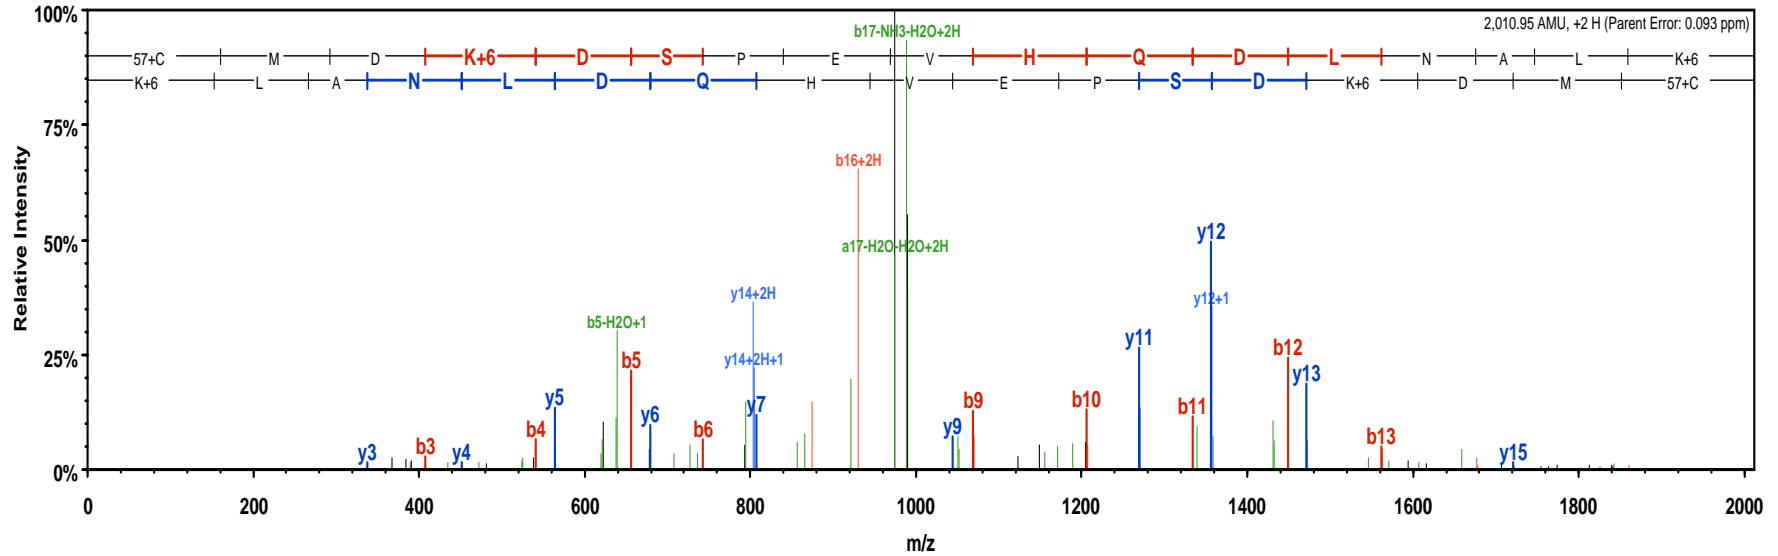

| ... | B Ions  | B+2H    | B-NH3   | B-H2O   | AA   | Y Ions  | Y+2H    | Y-NH3   | Y-H2O   | ... |
|-----|---------|---------|---------|---------|------|---------|---------|---------|---------|-----|
| 1   | 161.0   |         |         |         | C+57 | 2,012.0 | 1,006.5 | 1,994.9 | 1,994.0 | 17  |
| 2   | 292.1   |         |         |         | M    | 1,851.9 | 926.5   | 1,834.9 | 1,833.9 | 16  |
| 3   | 407.1   |         |         | 389.1   | D    | 1,720.9 | 860.9   | 1,703.9 | 1,702.9 | 15  |
| 4   | 541.2   | 271.1   | 524.2   | 523.2   | K+6  | 1,605.9 | 803.4   | 1,588.8 | 1,587.9 | 14  |
| 5   | 656.2   | 328.6   | 639.2   | 638.2   | D    | 1,471.7 | 736.4   | 1,454.7 | 1,453.7 | 13  |
| 6   | 743.3   | 372.1   | 726.3   | 725.3   | S    | 1,356.7 | 678.9   | 1,339.7 | 1,338.7 | 12  |
| 7   | 840.3   | 420.7   | 823.3   | 822.3   | P    | 1,269.7 | 635.3   | 1,252.7 | 1,251.7 | 11  |
| 8   | 969.4   | 485.2   | 952.3   | 951.4   | E    | 1,172.6 | 586.8   | 1,155.6 | 1,154.6 | 10  |
| 9   | 1,068.4 | 534.7   | 1,051.4 | 1,050.4 | V    | 1,043.6 | 522.3   | 1,026.6 | 1,025.6 | 9   |
| 10  | 1,205.5 | 603.3   | 1,188.5 | 1,187.5 | H    | 944.5   | 472.8   | 927.5   | 926.5   | 8   |
| 11  | 1,333.6 | 667.3   | 1,316.5 | 1,315.6 | Q    | 807.5   | 404.2   | 790.4   | 789.5   | 7   |
| 12  | 1,448.6 | 724.8   | 1,431.6 | 1,430.6 | D    | 679.4   | 340.2   | 662.4   | 661.4   | 6   |
| 13  | 1,561.7 | 781.3   | 1,544.6 | 1,543.7 | L    | 564.4   |         | 547.4   |         | 5   |
| 14  | 1,675.7 | 838.4   | 1,658.7 | 1,657.7 | N    | 451.3   |         | 434.3   |         | 4   |
| 15  | 1,746.8 | 873.9   | 1,729.7 | 1,728.7 | A    | 337.3   |         | 320.2   |         | 3   |
| 16  | 1,859.8 | 930.4   | 1,842.8 | 1,841.8 | L    | 266.2   |         | 249.2   |         | 2   |
| 17  | 2,012.0 | 1,006.5 | 1,994.9 | 1,994.0 | K+6  | 153.1   |         | 136.1   |         | 1   |

# Nuclear proteome

| Protein No. | Leading protein name  | Sequence      | Mascot Score | Variable Modifications | SILAC State | Charge | m/z       |
|-------------|-----------------------|---------------|--------------|------------------------|-------------|--------|-----------|
| N-99        | sp P62834 RAP1A_HUMAN | QWCNCAFLESSAK | 44.6         | Unmodified             | Light       | 2      | 800.84777 |

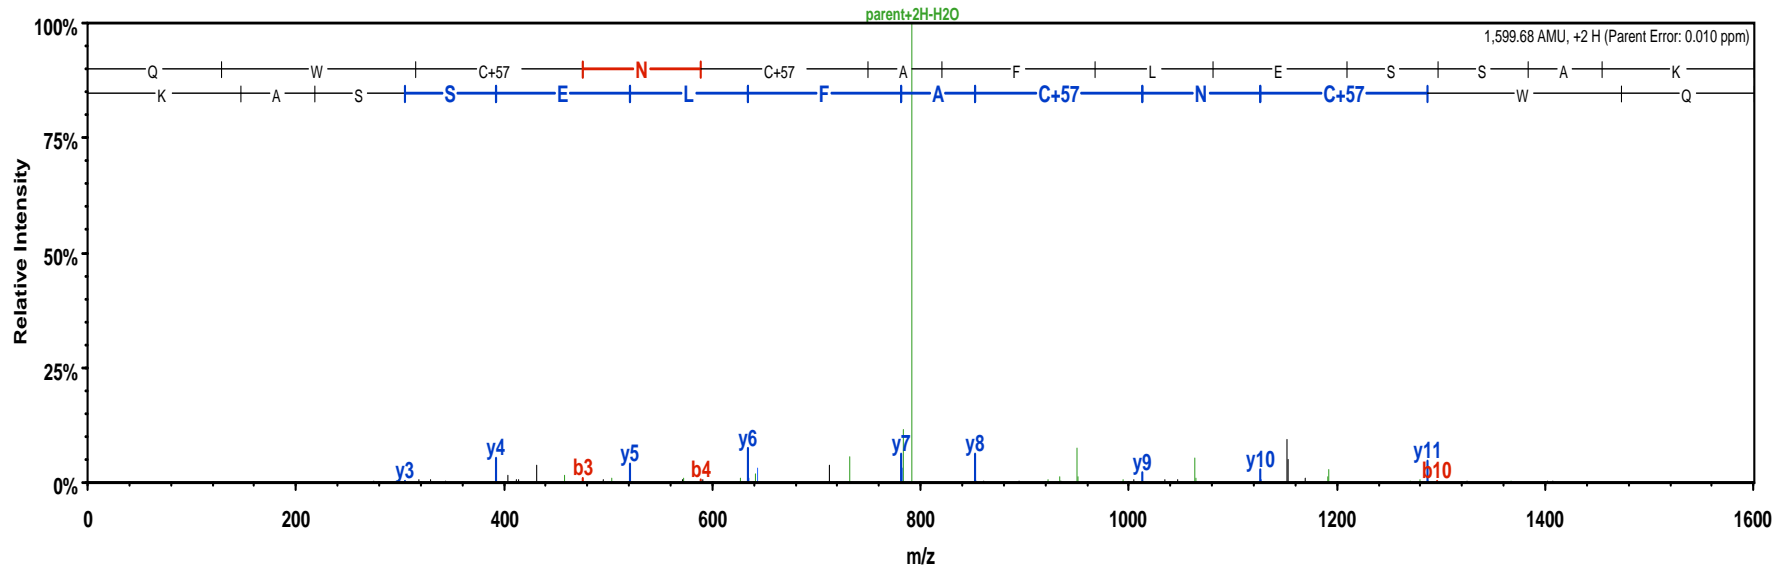

| ... | B Ions  | B+2H  | B-NH3   | B-H2O   | AA   | Y Ions  | Y+2H  | Y-NH3   | Y-H2O   | ... |
|-----|---------|-------|---------|---------|------|---------|-------|---------|---------|-----|
| 1   | 129.1   |       | 112.0   |         | Q    | 1,600.7 | 800.8 | 1,583.7 | 1,582.7 | 13  |
| 2   | 315.1   |       | 298.1   |         | W    | 1,472.6 | 736.8 | 1,455.6 | 1,454.6 | 12  |
| 3   | 475.2   |       | 458.1   |         | C+57 | 1,286.6 | 643.8 | 1,269.5 | 1,268.5 | 11  |
| 4   | 589.2   |       | 572.2   |         | N    | 1,126.5 | 563.8 | 1,109.5 | 1,108.5 | 10  |
| 5   | 749.2   |       | 732.2   |         | C+57 | 1,012.5 | 506.7 | 995.5   | 994.5   | 9   |
| 6   | 820.3   | 410.6 | 803.3   |         | A    | 852.4   | 426.7 | 835.4   | 834.4   | 8   |
| 7   | 967.4   | 484.2 | 950.3   |         | F    | 781.4   | 391.2 | 764.4   | 763.4   | 7   |
| 8   | 1,080.4 | 540.7 | 1,063.4 |         | L    | 634.3   | 317.7 | 617.3   | 616.3   | 6   |
| 9   | 1,209.5 | 605.2 | 1,192.5 | 1,191.5 | E    | 521.3   |       | 504.2   | 503.2   | 5   |
| 10  | 1,296.5 | 648.8 | 1,279.5 | 1,278.5 | S    | 392.2   |       | 375.2   | 374.2   | 4   |
| 11  | 1,383.5 | 692.3 | 1,366.5 | 1,365.5 | S    | 305.2   |       | 288.2   | 287.2   | 3   |
| 12  | 1,454.6 | 727.8 | 1,437.6 | 1,436.6 | A    | 218.1   |       | 201.1   |         | 2   |
| 13  | 1,600.7 | 800.8 | 1,583.7 | 1,582.7 | K    | 147.1   |       | 130.1   |         | 1   |

# Nuclear proteome

| Protein No. | Leading protein name  | Sequence                   | Mascot Score | Variable Modifications | SILAC State | Charge | m/z       |
|-------------|-----------------------|----------------------------|--------------|------------------------|-------------|--------|-----------|
| N-100       | sp Q9NX62 HMPA3_HUMAN | EVPAESVTVWIDPLDATQEYTEDLRK | 44.26        | Unmodified             | Light       | 3      | 1002.1644 |

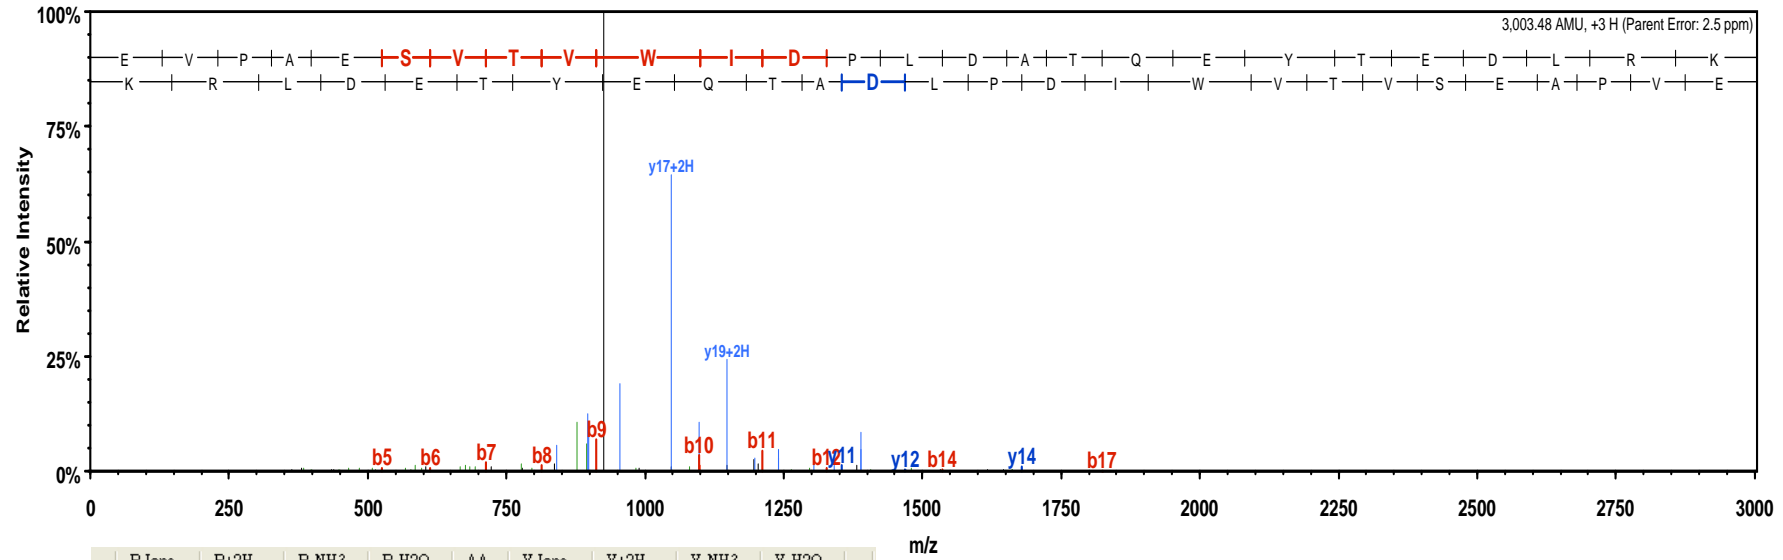

| ... | B Ions  | B+2H    | B-NH3   | B-H2O   | AA | Y Ions  | Y+2H    | Y-NH3   | Y-H2O   | ... |
|-----|---------|---------|---------|---------|----|---------|---------|---------|---------|-----|
| 1   | 130.0   |         |         | 112.0   | E  | 3,004.5 | 1,502.7 | 2,987.5 | 2,986.5 | 26  |
| 2   | 229.1   |         |         | 211.1   | V  | 2,875.4 | 1,438.2 | 2,858.4 | 2,857.4 | 25  |
| 3   | 326.2   |         |         | 308.2   | P  | 2,776.4 | 1,388.7 | 2,759.3 | 2,758.4 | 24  |
| 4   | 397.2   |         |         | 379.2   | A  | 2,679.3 | 1,340.2 | 2,662.3 | 2,661.3 | 23  |
| 5   | 526.3   |         |         | 508.2   | E  | 2,608.3 | 1,304.6 | 2,591.3 | 2,590.3 | 22  |
| 6   | 613.3   | 307.1   |         | 595.3   | S  | 2,479.2 | 1,240.1 | 2,462.2 | 2,461.2 | 21  |
| 7   | 712.4   | 356.7   |         | 694.3   | V  | 2,392.2 | 1,196.6 | 2,375.2 | 2,374.2 | 20  |
| 8   | 813.4   | 407.2   |         | 795.4   | T  | 2,293.1 | 1,147.1 | 2,276.1 | 2,275.1 | 19  |
| 9   | 912.5   | 456.7   |         | 894.5   | V  | 2,192.1 | 1,096.5 | 2,175.1 | 2,174.1 | 18  |
| 10  | 1,098.5 | 549.8   |         | 1,080.5 | W  | 2,093.0 | 1,047.0 | 2,076.0 | 2,075.0 | 17  |
| 11  | 1,211.6 | 606.3   |         | 1,193.6 | I  | 1,906.9 | 954.0   | 1,889.9 | 1,888.9 | 16  |
| 12  | 1,326.7 | 663.8   |         | 1,308.6 | D  | 1,793.9 | 897.4   | 1,776.8 | 1,775.8 | 15  |
| 13  | 1,423.7 | 712.4   |         | 1,405.7 | P  | 1,678.8 | 839.9   | 1,661.8 | 1,660.8 | 14  |
| 14  | 1,536.8 | 768.9   |         | 1,518.8 | L  | 1,581.8 | 791.4   | 1,564.7 | 1,563.8 | 13  |
| 15  | 1,651.8 | 826.4   |         | 1,633.8 | D  | 1,468.7 | 734.8   | 1,451.7 | 1,450.7 | 12  |
| 16  | 1,722.9 | 861.9   |         | 1,704.8 | A  | 1,353.7 | 677.3   | 1,336.6 | 1,335.7 | 11  |
| 17  | 1,823.9 | 912.5   |         | 1,805.9 | T  | 1,282.6 | 641.8   | 1,265.6 | 1,264.6 | 10  |
| 18  | 1,952.0 | 976.5   | 1,934.9 | 1,934.0 | Q  | 1,181.6 | 591.3   | 1,164.6 | 1,163.6 | 9   |
| 19  | 2,081.0 | 1,041.0 | 2,064.0 | 2,063.0 | E  | 1,053.5 | 527.3   | 1,036.5 | 1,035.5 | 8   |
| 20  | 2,244.1 | 1,122.5 | 2,227.0 | 2,226.1 | Y  | 924.5   | 462.7   | 907.5   | 906.5   | 7   |
| 21  | 2,345.1 | 1,173.1 | 2,328.1 | 2,327.1 | T  | 761.4   | 381.2   | 744.4   | 743.4   | 6   |
| 22  | 2,474.2 | 1,237.6 | 2,457.1 | 2,456.2 | E  | 660.4   | 330.7   | 643.3   | 642.4   | 5   |
| 23  | 2,589.2 | 1,295.1 | 2,572.2 | 2,571.2 | D  | 531.3   | 266.2   | 514.3   | 513.3   | 4   |
| 24  | 2,702.3 | 1,351.6 | 2,685.2 | 2,684.3 | L  | 416.3   | 208.7   | 399.3   |         | 3   |
| 25  | 2,858.4 | 1,429.7 | 2,841.3 | 2,840.4 | R  | 303.2   | 152.1   | 286.2   |         | 2   |
| 26  | 3,004.5 | 1,502.7 | 2,987.5 | 2,986.5 | K  | 147.1   |         | 130.1   |         | 1   |

# Nuclear proteome

| Protein No. | Leading protein name  | Sequence  | Mascot Score | Variable Modifications | SILAC State | Charge | m/z       |
|-------------|-----------------------|-----------|--------------|------------------------|-------------|--------|-----------|
| N-101       | sp Q96HC4 PDLI5_HUMAN | GPFLVALGK | 43.67        | Unmodified             | Heavy       | 2      | 451.27892 |

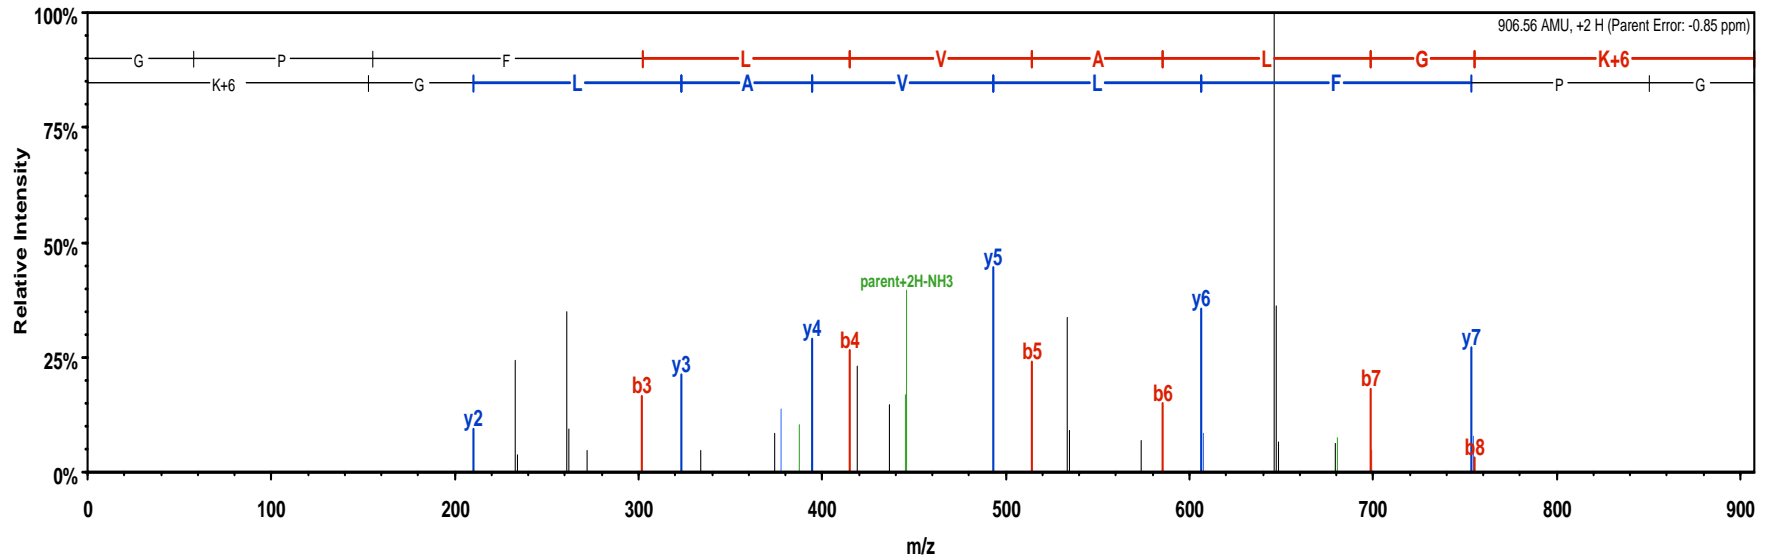

| ... | B Ions | B+2H  | B-NH3 | B-H2O | AA  | Y Ions | Y+2H  | Y-NH3 | Y-H2O | ... |
|-----|--------|-------|-------|-------|-----|--------|-------|-------|-------|-----|
| 1   | 58.0   |       |       |       | G   | 907.6  | 454.3 | 890.5 |       | 9   |
| 2   | 155.1  |       |       |       | P   | 850.5  | 425.8 | 833.5 |       | 8   |
| 3   | 302.1  |       |       |       | F   | 753.5  | 377.3 | 736.5 |       | 7   |
| 4   | 415.2  |       |       |       | L   | 606.4  | 303.7 | 589.4 |       | 6   |
| 5   | 514.3  |       |       |       | V   | 493.3  |       | 476.3 |       | 5   |
| 6   | 585.3  | 293.2 |       |       | A   | 394.3  |       | 377.2 |       | 4   |
| 7   | 698.4  | 349.7 |       |       | L   | 323.2  |       | 306.2 |       | 3   |
| 8   | 755.4  | 378.2 |       |       | G   | 210.2  |       | 193.1 |       | 2   |
| 9   | 907.6  | 454.3 | 890.5 |       | K+6 | 153.1  |       | 136.1 |       | 1   |

# Nuclear proteome

| Protein No. | Leading protein name  | Sequence                         | Mascot Score | Variable Modifications | SILAC State | Charge | m/z      |
|-------------|-----------------------|----------------------------------|--------------|------------------------|-------------|--------|----------|
| N-102       | sp P49770 EI2BB_HUMAN | FVAPEEVL <sup>+</sup> PFTEGDILEK | 42.18        | Unmodified             | Heavy       | 3      | 678.3541 |

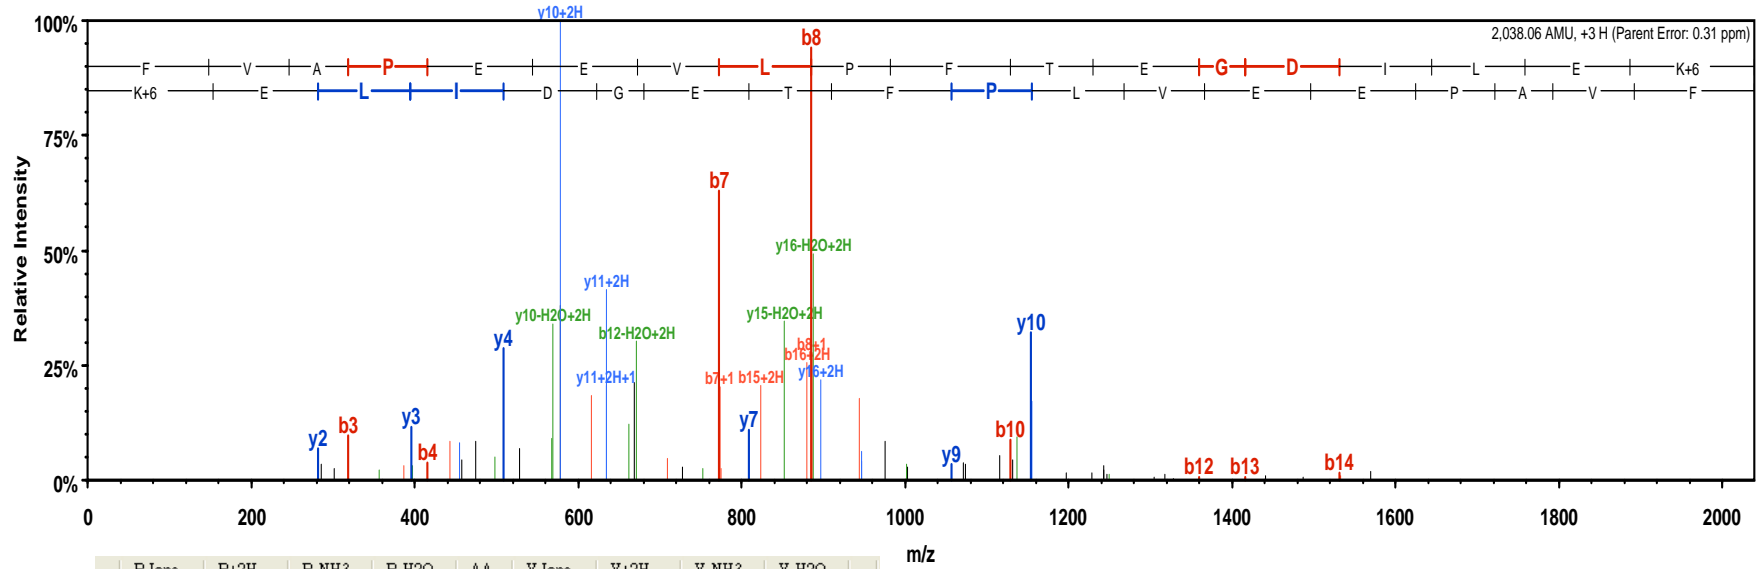

| ... | B Ions  | B+2H    | B-NH3   | B-H2O   | AA  | Y Ions  | Y+2H    | Y-NH3   | Y-H2O   | ... |
|-----|---------|---------|---------|---------|-----|---------|---------|---------|---------|-----|
| 1   | 148.1   |         |         |         | F   | 2,039.1 | 1,020.0 | 2,022.0 | 2,021.1 | 18  |
| 2   | 247.1   |         |         |         | V   | 1,892.0 | 946.5   | 1,875.0 | 1,874.0 | 17  |
| 3   | 318.2   |         |         |         | A   | 1,792.9 | 897.0   | 1,775.9 | 1,774.9 | 16  |
| 4   | 415.2   |         |         |         | P   | 1,721.9 | 861.5   | 1,704.9 | 1,703.9 | 15  |
| 5   | 544.3   |         |         | 526.3   | E   | 1,624.8 | 812.9   | 1,607.8 | 1,606.8 | 14  |
| 6   | 673.3   | 337.2   |         | 655.3   | E   | 1,495.8 | 748.4   | 1,478.8 | 1,477.8 | 13  |
| 7   | 772.4   | 386.7   |         | 754.4   | V   | 1,366.8 | 683.9   | 1,349.7 | 1,348.7 | 12  |
| 8   | 885.5   | 443.2   |         | 867.5   | L   | 1,267.7 | 634.3   | 1,250.7 | 1,249.7 | 11  |
| 9   | 982.5   | 491.8   |         | 964.5   | P   | 1,154.6 | 577.8   | 1,137.6 | 1,136.6 | 10  |
| 10  | 1,129.6 | 565.3   |         | 1,111.6 | F   | 1,057.6 | 529.3   | 1,040.5 | 1,039.5 | 9   |
| 11  | 1,230.6 | 615.8   |         | 1,212.6 | T   | 910.5   | 455.7   | 893.5   | 892.5   | 8   |
| 12  | 1,359.7 | 680.3   |         | 1,341.7 | E   | 809.4   | 405.2   | 792.4   | 791.4   | 7   |
| 13  | 1,416.7 | 708.9   |         | 1,398.7 | G   | 680.4   | 340.7   | 663.4   | 662.4   | 6   |
| 14  | 1,531.7 | 766.4   |         | 1,513.7 | D   | 623.4   |         | 606.3   | 605.4   | 5   |
| 15  | 1,644.8 | 822.9   |         | 1,626.8 | I   | 508.3   |         | 491.3   | 490.3   | 4   |
| 16  | 1,757.9 | 879.5   |         | 1,739.9 | L   | 395.3   |         | 378.2   | 377.2   | 3   |
| 17  | 1,886.9 | 944.0   |         | 1,868.9 | E   | 282.2   |         | 265.1   | 264.2   | 2   |
| 18  | 2,039.1 | 1,020.0 | 2,022.0 | 2,021.1 | K+6 | 153.1   |         | 136.1   |         | 1   |

# Nuclear proteome

| Protein No. | Leading protein name  | Sequence                      | Mascot Score | Variable Modifications | SILAC State | Charge | m/z      |
|-------------|-----------------------|-------------------------------|--------------|------------------------|-------------|--------|----------|
| N-103       | sp P50238 CRIP1_HUMAN | TLTSGGHAEEHEGKPYCNHPCYAAMFGPK | 41.9         | Unmodified             | Light       | 3      | 1039.797 |

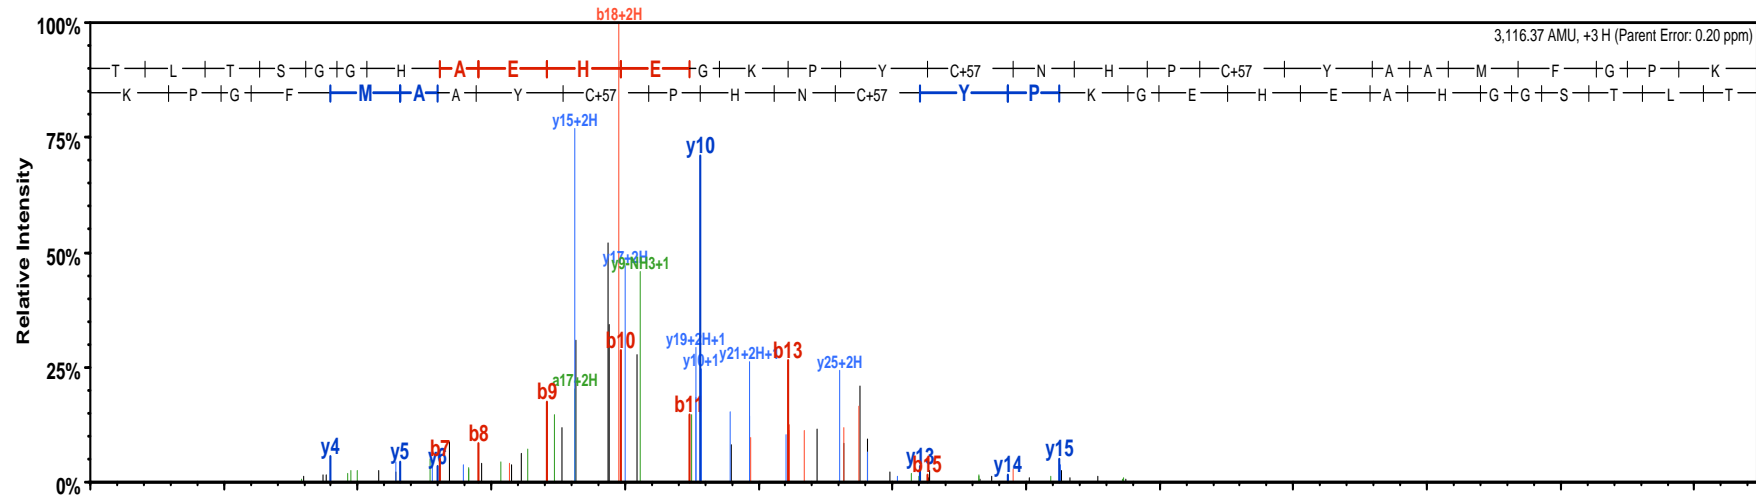

| ... | B Ions  | B+2H    | B-NH3   | B-H2O   | AA   | Y Ions  | Y+2H    | Y-NH3   | Y-H2O   | ... |
|-----|---------|---------|---------|---------|------|---------|---------|---------|---------|-----|
| 1   | 102.1   |         |         | 84.0    | T    | 3,117.4 | 1,559.2 | 3,100.3 | 3,099.4 | 28  |
| 2   | 215.1   |         |         | 197.1   | L    | 3,016.3 | 1,508.7 | 2,999.3 | 2,998.3 | 27  |
| 3   | 316.2   |         |         | 298.2   | T    | 2,903.2 | 1,452.1 | 2,886.2 | 2,885.2 | 26  |
| 4   | 403.2   |         |         | 385.2   | S    | 2,802.2 | 1,401.6 | 2,785.2 | 2,784.2 | 25  |
| 5   | 460.2   |         |         | 442.2   | G    | 2,715.2 | 1,358.1 | 2,698.1 | 2,697.2 | 24  |
| 6   | 517.3   | 259.1   |         | 499.3   | G    | 2,658.1 | 1,329.6 | 2,641.1 | 2,640.1 | 23  |
| 7   | 654.3   | 327.7   |         | 636.3   | H    | 2,601.1 | 1,301.1 | 2,584.1 | 2,583.1 | 22  |
| 8   | 725.4   | 363.2   |         | 707.3   | A    | 2,464.1 | 1,232.5 | 2,447.0 | 2,446.1 | 21  |
| 9   | 854.4   | 427.7   |         | 836.4   | E    | 2,393.0 | 1,197.0 | 2,376.0 | 2,375.0 | 20  |
| 10  | 991.5   | 496.2   |         | 973.4   | H    | 2,264.0 | 1,132.5 | 2,247.0 | 2,246.0 | 19  |
| 11  | 1,120.5 | 560.8   |         | 1,102.5 | E    | 2,126.9 | 1,064.0 | 2,109.9 | 2,108.9 | 18  |
| 12  | 1,177.5 | 589.3   |         | 1,159.5 | G    | 1,997.9 | 999.4   | 1,980.9 |         | 17  |
| 13  | 1,305.6 | 653.3   | 1,288.6 | 1,287.6 | K    | 1,940.9 | 970.9   | 1,923.8 |         | 16  |
| 14  | 1,402.7 | 701.8   | 1,385.6 | 1,384.7 | P    | 1,812.8 | 906.9   | 1,795.7 |         | 15  |
| 15  | 1,565.7 | 783.4   | 1,548.7 | 1,547.7 | Y    | 1,715.7 | 858.4   | 1,698.7 |         | 14  |
| 16  | 1,725.8 | 863.4   | 1,708.7 | 1,707.8 | C+57 | 1,552.6 | 776.8   | 1,535.6 |         | 13  |
| 17  | 1,839.8 | 920.4   | 1,822.8 | 1,821.8 | N    | 1,392.6 | 696.8   | 1,375.6 |         | 12  |
| 18  | 1,976.9 | 988.9   | 1,959.8 | 1,958.9 | H    | 1,278.6 | 639.8   | 1,261.5 |         | 11  |
| 19  | 2,073.9 | 1,037.5 | 2,056.9 | 2,055.9 | P    | 1,141.5 | 571.3   | 1,124.5 |         | 10  |
| 20  | 2,234.0 | 1,117.5 | 2,216.9 | 2,215.9 | C+57 | 1,044.5 | 522.7   | 1,027.4 |         | 9   |
| 21  | 2,397.0 | 1,199.0 | 2,380.0 | 2,379.0 | Y    | 884.4   | 442.7   | 867.4   |         | 8   |
| 22  | 2,468.1 | 1,234.5 | 2,451.0 | 2,450.0 | A    | 721.4   | 361.2   | 704.3   |         | 7   |
| 23  | 2,539.1 | 1,270.0 | 2,522.1 | 2,521.1 | A    | 650.3   | 325.7   | 633.3   |         | 6   |
| 24  | 2,670.1 | 1,335.6 | 2,653.1 | 2,652.1 | M    | 579.3   |         | 562.3   |         | 5   |
| 25  | 2,817.2 | 1,409.1 | 2,800.2 | 2,799.2 | F    | 448.3   |         | 431.2   |         | 4   |
| 26  | 2,874.2 | 1,437.6 | 2,857.2 | 2,856.2 | G    | 301.2   |         | 284.2   |         | 3   |
| 27  | 2,971.3 | 1,486.1 | 2,954.2 | 2,953.3 | P    | 244.2   |         | 227.1   |         | 2   |
| 28  | 3,117.4 | 1,559.2 | 3,100.3 | 3,099.4 | K    | 147.1   |         | 130.1   |         | 1   |



# Nuclear proteome

| Protein No. | Leading protein name | Sequence                             | Mascot Score | Variable Modifications | SILAC State | Charge | m/z       |
|-------------|----------------------|--------------------------------------|--------------|------------------------|-------------|--------|-----------|
| N-104       | splP30049 ATPD_HUMAN | YFVSSGSIAVNADSSVQLLAEEAVTLDMMLDLGAAK | 41.39        | Unmodified             | Light       | 3      | 1195.6062 |

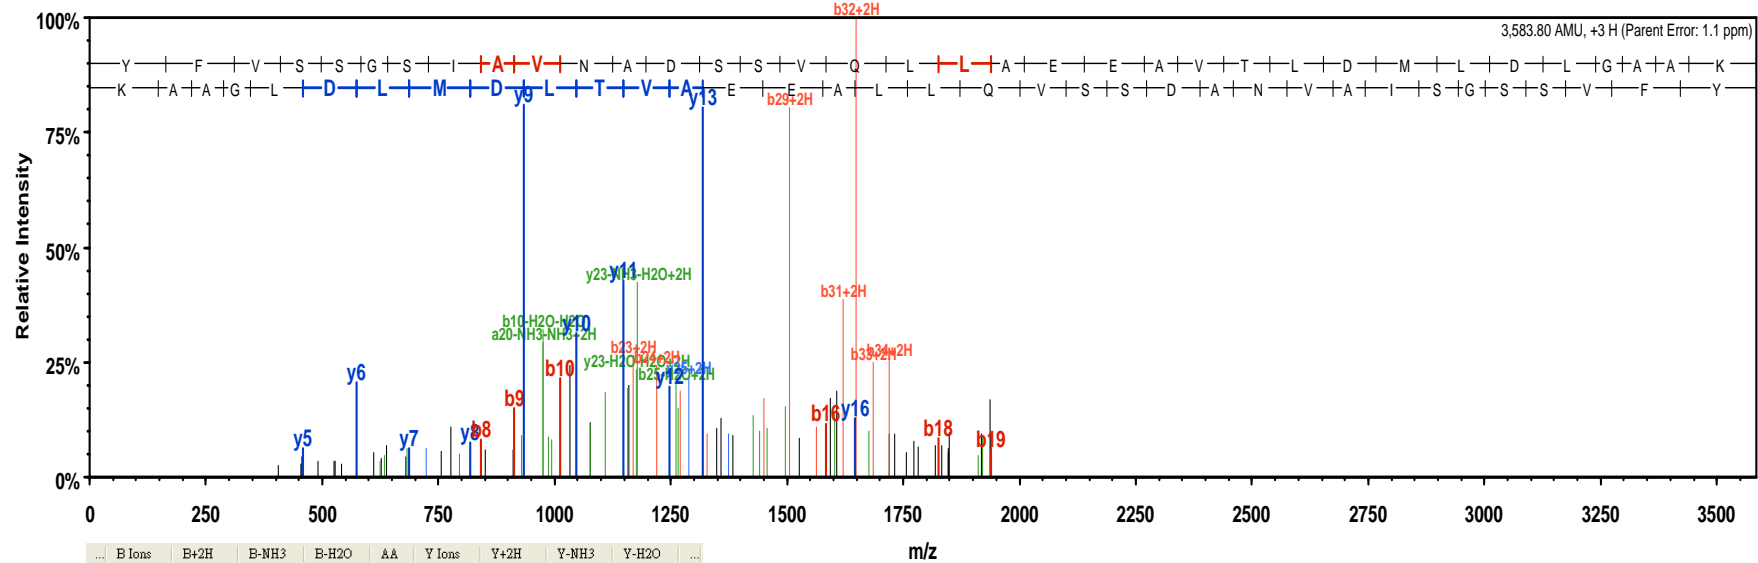

| ... | B Ions  | B+2H    | B-NH3   | B-H2O   | AA | Y Ions  | Y+2H    | Y-NH3   | Y-H2O   | ... |
|-----|---------|---------|---------|---------|----|---------|---------|---------|---------|-----|
| 1   | 164.1   |         |         |         | Y  | 3,584.8 | 1,792.9 | 3,567.8 | 3,566.8 | 35  |
| 2   | 311.1   |         |         |         | F  | 3,421.7 | 1,711.4 | 3,404.7 | 3,403.7 | 34  |
| 3   | 410.2   |         |         |         | V  | 3,274.7 | 1,637.8 | 3,257.6 | 3,256.7 | 33  |
| 4   | 497.2   |         |         | 479.2   | S  | 3,175.6 | 1,588.3 | 3,158.6 | 3,157.6 | 32  |
| 5   | 584.3   |         |         | 566.3   | S  | 3,088.6 | 1,544.8 | 3,071.5 | 3,070.6 | 31  |
| 6   | 641.3   | 321.2   |         | 623.3   | G  | 3,001.5 | 1,501.3 | 2,984.5 | 2,983.5 | 30  |
| 7   | 728.3   | 364.7   |         | 710.3   | S  | 2,944.5 | 1,472.8 | 2,927.5 | 2,926.5 | 29  |
| 8   | 841.4   | 421.2   |         | 823.4   | I  | 2,857.5 | 1,429.2 | 2,840.5 | 2,839.5 | 28  |
| 9   | 912.4   | 456.7   |         | 894.4   | A  | 2,744.4 | 1,372.7 | 2,727.4 | 2,726.4 | 27  |
| 10  | 1,011.5 | 506.3   |         | 993.5   | V  | 2,673.4 | 1,337.2 | 2,656.3 | 2,655.4 | 26  |
| 11  | 1,125.6 | 563.3   | 1,108.5 | 1,107.5 | N  | 2,574.3 | 1,287.7 | 2,557.3 | 2,556.3 | 25  |
| 12  | 1,196.6 | 598.8   | 1,179.6 | 1,178.6 | A  | 2,460.3 | 1,230.6 | 2,443.2 | 2,442.2 | 24  |
| 13  | 1,311.6 | 656.3   | 1,294.6 | 1,293.6 | D  | 2,389.2 | 1,195.1 | 2,372.2 | 2,371.2 | 23  |
| 14  | 1,398.7 | 699.8   | 1,381.6 | 1,380.6 | S  | 2,274.2 | 1,137.6 | 2,257.2 | 2,256.2 | 22  |
| 15  | 1,485.7 | 743.3   | 1,468.7 | 1,467.7 | S  | 2,187.2 | 1,094.1 | 2,170.1 | 2,169.1 | 21  |
| 16  | 1,584.8 | 792.9   | 1,567.7 | 1,566.7 | V  | 2,100.1 | 1,050.6 | 2,083.1 | 2,082.1 | 20  |
| 17  | 1,712.8 | 856.9   | 1,695.8 | 1,694.8 | Q  | 2,001.1 | 1,001.0 | 1,984.0 | 1,983.0 | 19  |
| 18  | 1,825.9 | 913.5   | 1,808.9 | 1,807.9 | L  | 1,873.0 | 937.0   | 1,856.0 | 1,855.0 | 18  |
| 19  | 1,939.0 | 970.0   | 1,922.0 | 1,921.0 | L  | 1,759.9 | 880.5   | 1,742.9 | 1,741.9 | 17  |
| 20  | 2,010.0 | 1,005.5 | 1,993.0 | 1,992.0 | A  | 1,646.8 | 823.9   | 1,629.8 | 1,628.8 | 16  |
| 21  | 2,139.1 | 1,070.0 | 2,122.0 | 2,121.0 | E  | 1,575.8 | 788.4   | 1,558.8 | 1,557.8 | 15  |
| 22  | 2,268.1 | 1,134.6 | 2,251.1 | 2,250.1 | E  | 1,446.8 | 723.9   | 1,429.7 | 1,428.7 | 14  |
| 23  | 2,339.1 | 1,170.1 | 2,322.1 | 2,321.1 | A  | 1,317.7 | 659.4   | 1,300.7 | 1,299.7 | 13  |
| 24  | 2,438.2 | 1,219.6 | 2,421.2 | 2,420.2 | V  | 1,246.7 | 623.8   | 1,229.6 | 1,228.6 | 12  |
| 25  | 2,539.3 | 1,270.1 | 2,522.2 | 2,521.2 | T  | 1,147.6 | 574.3   | 1,130.6 | 1,129.6 | 11  |
| 26  | 2,652.3 | 1,326.7 | 2,635.3 | 2,634.3 | L  | 1,046.6 | 523.8   | 1,029.5 | 1,028.5 | 10  |
| 27  | 2,767.4 | 1,384.2 | 2,750.3 | 2,749.4 | D  | 933.5   | 467.2   | 916.4   | 915.4   | 9   |
| 28  | 2,898.4 | 1,449.7 | 2,881.4 | 2,880.4 | M  | 818.4   | 409.7   | 801.4   | 800.4   | 8   |
| 29  | 3,011.5 | 1,506.2 | 2,994.5 | 2,993.5 | L  | 687.4   | 344.2   | 670.4   | 669.4   | 7   |
| 30  | 3,126.5 | 1,563.8 | 3,109.5 | 3,108.5 | D  | 574.3   | 287.7   | 557.3   | 556.3   | 6   |
| 31  | 3,239.6 | 1,620.3 | 3,222.6 | 3,221.6 | L  | 459.3   |         | 442.3   |         | 5   |
| 32  | 3,296.6 | 1,648.8 | 3,279.6 | 3,278.6 | G  | 346.2   |         | 329.2   |         | 4   |
| 33  | 3,367.7 | 1,684.3 | 3,350.6 | 3,349.7 | A  | 289.2   |         | 272.2   |         | 3   |
| 34  | 3,438.7 | 1,719.9 | 3,421.7 | 3,420.7 | A  | 218.1   |         | 201.1   |         | 2   |
| 35  | 3,584.8 | 1,792.9 | 3,567.8 | 3,566.8 | K  | 147.1   |         | 130.1   |         | 1   |

# Nuclear proteome

| Protein No. | Leading protein name  | Sequence  | Mascot Score | Variable Modifications  | SILAC State | Charge | m/z       |
|-------------|-----------------------|-----------|--------------|-------------------------|-------------|--------|-----------|
| N-105       | sp Q9HD42 CHM1A_HUMAN | MDDTLFQLK | 40.97        | Acetyl (Protein N-term) | Heavy       | 2      | 576.78391 |

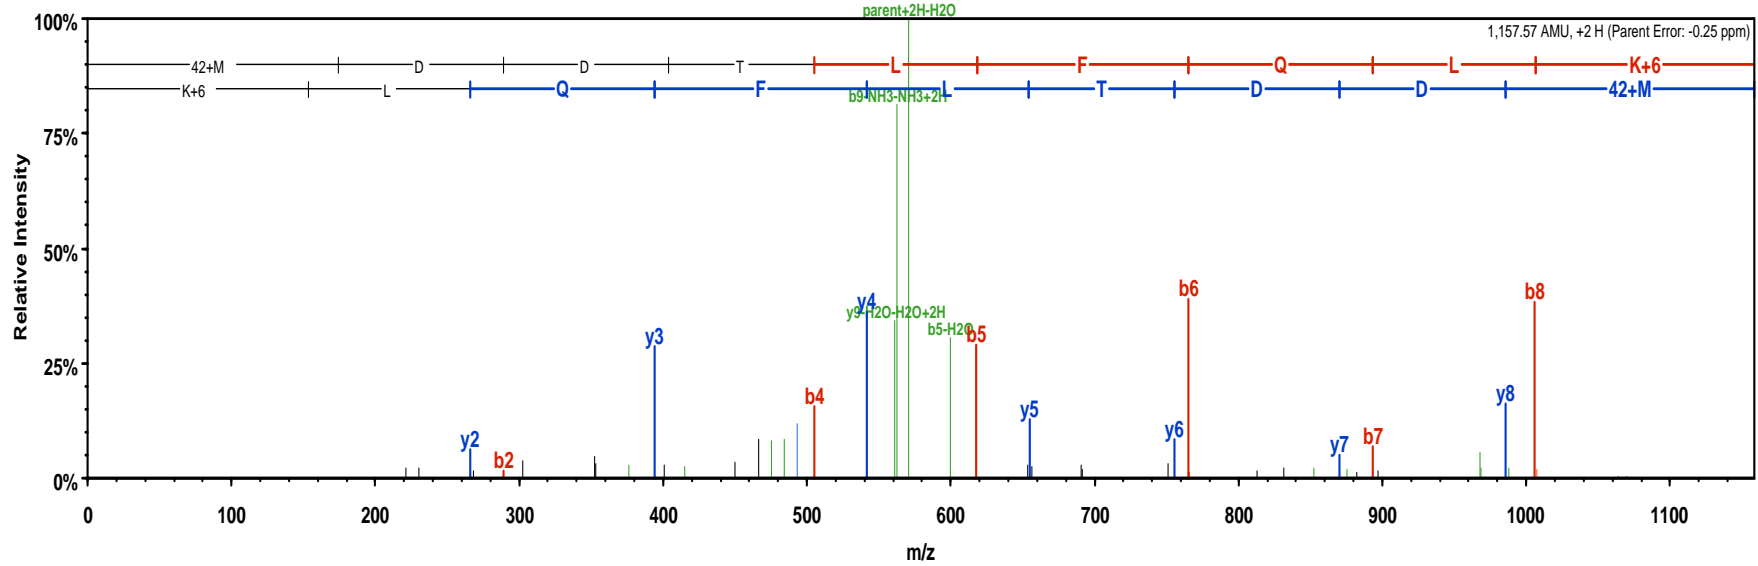

| ... | B Ions  | B+2H  | B-NH3   | B-H2O   | AA   | Y Ions  | Y+2H  | Y-NH3   | Y-H2O   | ... |
|-----|---------|-------|---------|---------|------|---------|-------|---------|---------|-----|
| 1   | 174.1   |       |         |         | M+42 | 1,158.6 | 579.8 | 1,141.6 | 1,140.6 | 9   |
| 2   | 289.1   |       |         | 271.1   | D    | 985.5   | 493.3 | 968.5   | 967.5   | 8   |
| 3   | 404.1   |       |         | 386.1   | D    | 870.5   | 435.8 | 853.5   | 852.5   | 7   |
| 4   | 505.2   |       |         | 487.1   | T    | 755.5   | 378.2 | 738.4   | 737.5   | 6   |
| 5   | 618.2   |       |         | 600.2   | L    | 654.4   |       | 637.4   |         | 5   |
| 6   | 765.3   | 383.2 |         | 747.3   | F    | 541.3   |       | 524.3   |         | 4   |
| 7   | 893.4   | 447.2 | 876.3   | 875.4   | Q    | 394.3   |       | 377.2   |         | 3   |
| 8   | 1,006.5 | 503.7 | 989.4   | 988.4   | L    | 266.2   |       | 249.2   |         | 2   |
| 9   | 1,158.6 | 579.8 | 1,141.6 | 1,140.6 | K+6  | 153.1   |       | 136.1   |         | 1   |

# Nuclear proteome

| Protein No. | Leading protein name   | Sequence                        | Mascot Score | Variable Modifications | SILAC State | Charge | m/z       |
|-------------|------------------------|---------------------------------|--------------|------------------------|-------------|--------|-----------|
| N-106       | sp Q9UBU7 IDBF4A_HUMAN | DCQEDD <sup>+</sup> TTVKEQNFLYK | 40.53        | Unmodified             | Light       | 2      | 1066.9757 |

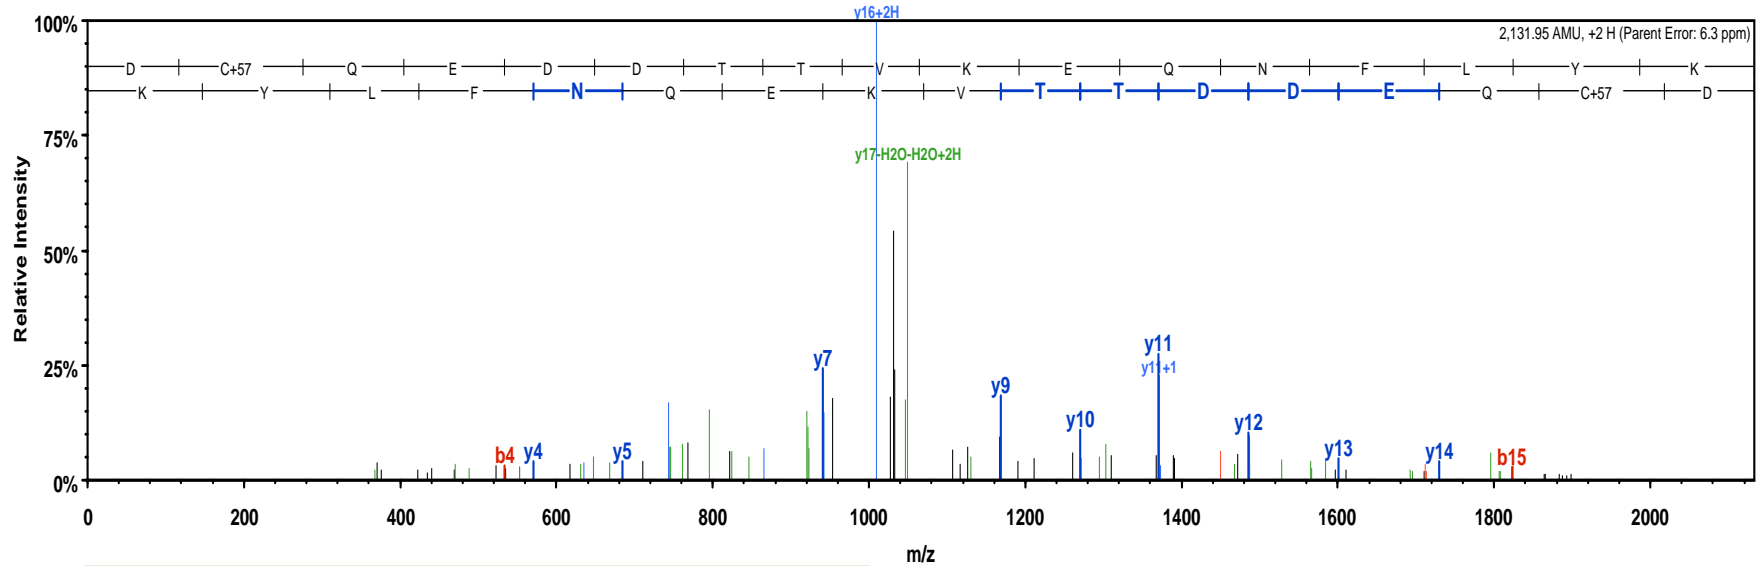

| ... | B Ions  | B+2H    | B-NH3   | B-H2O   | AA   | Y Ions  | Y+2H    | Y-NH3   | Y-H2O   | ... |
|-----|---------|---------|---------|---------|------|---------|---------|---------|---------|-----|
| 1   | 116.0   |         |         | 98.0    | D    | 2,132.9 | 1,067.0 | 2,115.9 | 2,114.9 | 17  |
| 2   | 276.1   |         |         | 258.1   | C+57 | 2,017.9 | 1,009.5 | 2,000.9 | 1,999.9 | 16  |
| 3   | 404.1   |         | 387.1   | 386.1   | Q    | 1,857.9 | 929.4   | 1,840.9 | 1,839.9 | 15  |
| 4   | 533.2   |         | 516.1   | 515.2   | E    | 1,729.8 | 865.4   | 1,712.8 | 1,711.8 | 14  |
| 5   | 648.2   |         | 631.2   | 630.2   | D    | 1,600.8 | 800.9   | 1,583.8 | 1,582.8 | 13  |
| 6   | 763.2   | 382.1   | 746.2   | 745.2   | D    | 1,485.8 | 743.4   | 1,468.7 | 1,467.7 | 12  |
| 7   | 864.3   | 432.6   | 847.2   | 846.3   | T    | 1,370.7 | 685.9   | 1,353.7 | 1,352.7 | 11  |
| 8   | 965.3   | 483.2   | 948.3   | 947.3   | T    | 1,269.7 | 635.3   | 1,252.7 | 1,251.7 | 10  |
| 9   | 1,064.4 | 532.7   | 1,047.4 | 1,046.4 | V    | 1,168.6 | 584.8   | 1,151.6 | 1,150.6 | 9   |
| 10  | 1,192.5 | 596.7   | 1,175.5 | 1,174.5 | K    | 1,069.6 | 535.3   | 1,052.5 | 1,051.6 | 8   |
| 11  | 1,321.5 | 661.3   | 1,304.5 | 1,303.5 | E    | 941.5   | 471.2   | 924.4   | 923.5   | 7   |
| 12  | 1,449.6 | 725.3   | 1,432.6 | 1,431.6 | Q    | 812.4   | 406.7   | 795.4   |         | 6   |
| 13  | 1,563.6 | 782.3   | 1,546.6 | 1,545.6 | N    | 684.4   |         | 667.3   |         | 5   |
| 14  | 1,710.7 | 855.8   | 1,693.7 | 1,692.7 | F    | 570.3   |         | 553.3   |         | 4   |
| 15  | 1,823.8 | 912.4   | 1,806.7 | 1,805.8 | L    | 423.3   |         | 406.2   |         | 3   |
| 16  | 1,986.8 | 993.9   | 1,969.8 | 1,968.8 | V    | 310.2   |         | 293.1   |         | 2   |
| 17  | 2,132.9 | 1,067.0 | 2,115.9 | 2,114.9 | K    | 147.1   |         | 130.1   |         | 1   |

# Nuclear proteome

| Protein No. | Leading protein name | Sequence          | Mascot Score | Variable Modifications | SILAC State | Charge | m/z       |
|-------------|----------------------|-------------------|--------------|------------------------|-------------|--------|-----------|
| N-107       | spIP30085IKCY_HUMAN  | SVDEVFDEVVQIFDKEG | 40.05        | Unmodified             | Light       | 2      | 977.96765 |

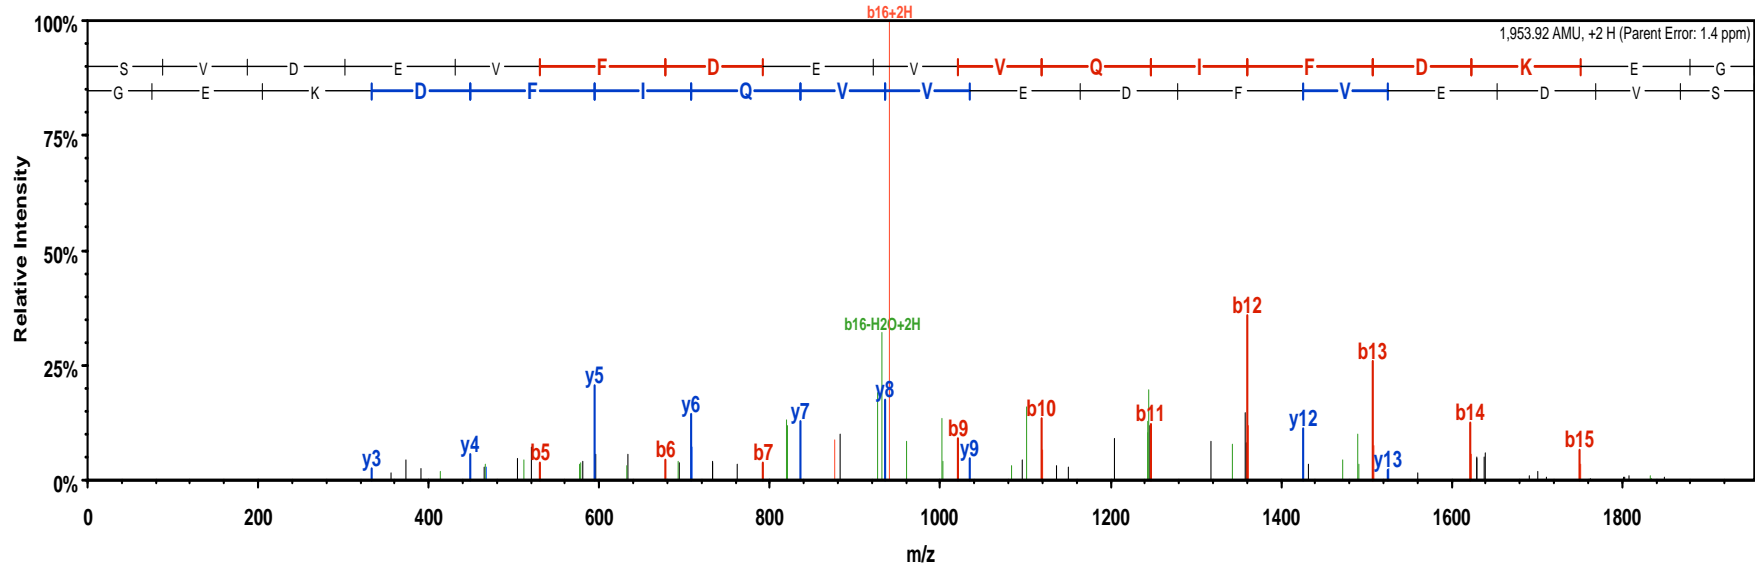

| ... | B Ions  | B+2H  | B-NH3   | B-H2O   | AA | Y Ions  | Y+2H  | Y-MH3   | Y-H2O   | ... |
|-----|---------|-------|---------|---------|----|---------|-------|---------|---------|-----|
| 1   | 88.0    |       |         | 70.0    | S  | 1,954.9 | 978.0 | 1,937.9 | 1,936.9 | 17  |
| 2   | 187.1   |       |         | 169.1   | V  | 1,867.9 | 934.5 | 1,850.9 | 1,849.9 | 16  |
| 3   | 302.1   |       |         | 284.1   | D  | 1,768.8 | 884.9 | 1,751.8 | 1,750.8 | 15  |
| 4   | 431.2   |       |         | 413.2   | E  | 1,653.8 | 827.4 | 1,636.8 | 1,635.8 | 14  |
| 5   | 530.2   |       |         | 512.2   | V  | 1,524.8 | 762.9 | 1,507.7 | 1,506.7 | 13  |
| 6   | 677.3   | 339.2 |         | 659.3   | F  | 1,425.7 | 713.3 | 1,408.7 | 1,407.7 | 12  |
| 7   | 792.3   | 396.7 |         | 774.3   | D  | 1,278.6 | 639.8 | 1,261.6 | 1,260.6 | 11  |
| 8   | 921.4   | 461.2 |         | 903.4   | E  | 1,163.6 | 582.3 | 1,146.6 | 1,145.6 | 10  |
| 9   | 1,020.5 | 510.7 |         | 1,002.4 | V  | 1,034.6 | 517.8 | 1,017.5 | 1,016.5 | 9   |
| 10  | 1,119.5 | 560.3 |         | 1,101.5 | V  | 935.5   | 468.2 | 918.5   | 917.5   | 8   |
| 11  | 1,247.6 | 624.3 | 1,230.6 | 1,229.6 | Q  | 836.4   | 418.7 | 819.4   | 818.4   | 7   |
| 12  | 1,360.7 | 680.8 | 1,343.6 | 1,342.7 | I  | 708.4   | 354.7 | 691.3   | 690.3   | 6   |
| 13  | 1,507.7 | 754.4 | 1,490.7 | 1,489.7 | F  | 595.3   |       | 578.2   | 577.3   | 5   |
| 14  | 1,622.8 | 811.9 | 1,605.7 | 1,604.7 | D  | 448.2   |       | 431.2   | 430.2   | 4   |
| 15  | 1,750.9 | 875.9 | 1,733.8 | 1,732.8 | K  | 333.2   |       | 316.2   | 315.2   | 3   |
| 16  | 1,879.9 | 940.5 | 1,862.9 | 1,861.9 | E  | 205.1   |       |         | 187.1   | 2   |
| 17  | 1,954.9 | 978.0 | 1,937.9 | 1,936.9 | G  | 76.0    |       |         |         | 1   |

# Nuclear proteome

| Protein No. | Leading protein name | Sequence         | Mascot Score | Variable Modifications | SILAC State | Charge | m/z       |
|-------------|----------------------|------------------|--------------|------------------------|-------------|--------|-----------|
| N-108       | sp P68032 ACTC_HUMAN | YPIEHGIITNWDDMEK | 38.71        | Unmodified             | Heavy       | 2      | 980.95911 |

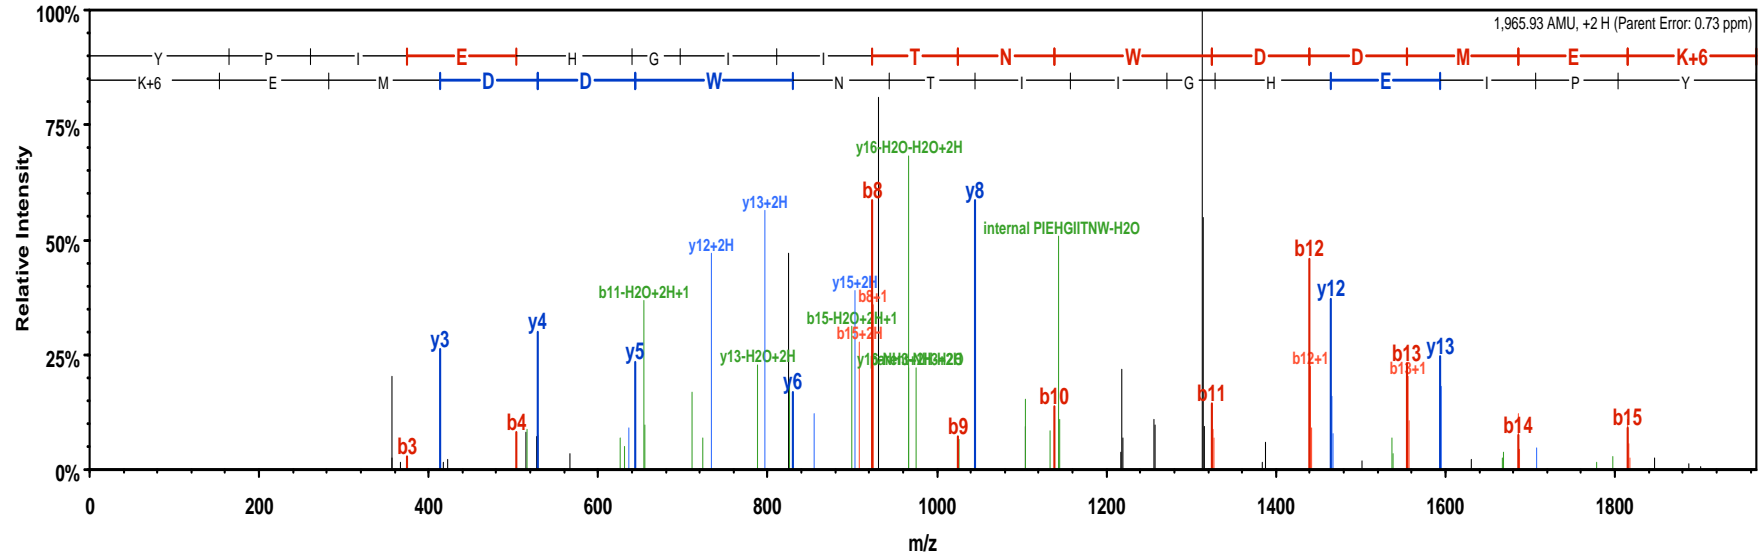

| ... | B Ions  | B+2H  | B-NH3   | B-H2O   | AA  | Y Ions  | Y+2H  | Y-NH3   | Y-H2O   | ... |
|-----|---------|-------|---------|---------|-----|---------|-------|---------|---------|-----|
| 1   | 164.1   |       |         |         | Y   | 1,966.9 | 984.0 | 1,949.9 | 1,948.9 | 16  |
| 2   | 261.1   |       |         |         | P   | 1,803.9 | 902.4 | 1,786.8 | 1,785.9 | 15  |
| 3   | 374.2   |       |         |         | I   | 1,706.8 | 853.9 | 1,689.8 | 1,688.8 | 14  |
| 4   | 503.3   |       |         | 485.2   | E   | 1,593.7 | 797.4 | 1,576.7 | 1,575.7 | 13  |
| 5   | 640.3   | 320.7 |         | 622.3   | H   | 1,464.7 | 732.8 | 1,447.7 | 1,446.7 | 12  |
| 6   | 697.3   | 349.2 |         | 679.3   | G   | 1,327.6 | 664.3 | 1,310.6 | 1,309.6 | 11  |
| 7   | 810.4   | 405.7 |         | 792.4   | I   | 1,270.6 | 635.8 | 1,253.6 | 1,252.6 | 10  |
| 8   | 923.5   | 462.3 |         | 905.5   | I   | 1,157.5 | 579.3 | 1,140.5 | 1,139.5 | 9   |
| 9   | 1,024.5 | 512.8 |         | 1,006.5 | T   | 1,044.4 | 522.7 | 1,027.4 | 1,026.4 | 8   |
| 10  | 1,138.6 | 569.8 | 1,121.6 | 1,120.6 | N   | 943.4   | 472.2 | 926.4   | 925.4   | 7   |
| 11  | 1,324.7 | 662.8 | 1,307.6 | 1,306.7 | W   | 829.3   | 415.2 | 812.3   | 811.3   | 6   |
| 12  | 1,439.7 | 720.4 | 1,422.7 | 1,421.7 | D   | 643.3   |       | 626.2   | 625.3   | 5   |
| 13  | 1,554.7 | 777.9 | 1,537.7 | 1,536.7 | D   | 528.2   |       | 511.2   | 510.2   | 4   |
| 14  | 1,685.8 | 843.4 | 1,668.7 | 1,667.8 | M   | 413.2   |       | 396.2   | 395.2   | 3   |
| 15  | 1,814.8 | 907.9 | 1,797.8 | 1,796.8 | E   | 282.2   |       | 265.1   | 264.2   | 2   |
| 16  | 1,966.9 | 984.0 | 1,949.9 | 1,948.9 | K+6 | 153.1   |       | 136.1   |         | 1   |

# Nuclear proteome

| Protein No. | Leading protein name | Sequence   | Mascot Score | Variable Modifications  | SILAC State | Charge | m/z       |
|-------------|----------------------|------------|--------------|-------------------------|-------------|--------|-----------|
| N-109       | sp P12235 ADT1_HUMAN | GDHAWSFLLK | 37.23        | Acetyl (Protein N-term) | Heavy       | 2      | 551.76945 |

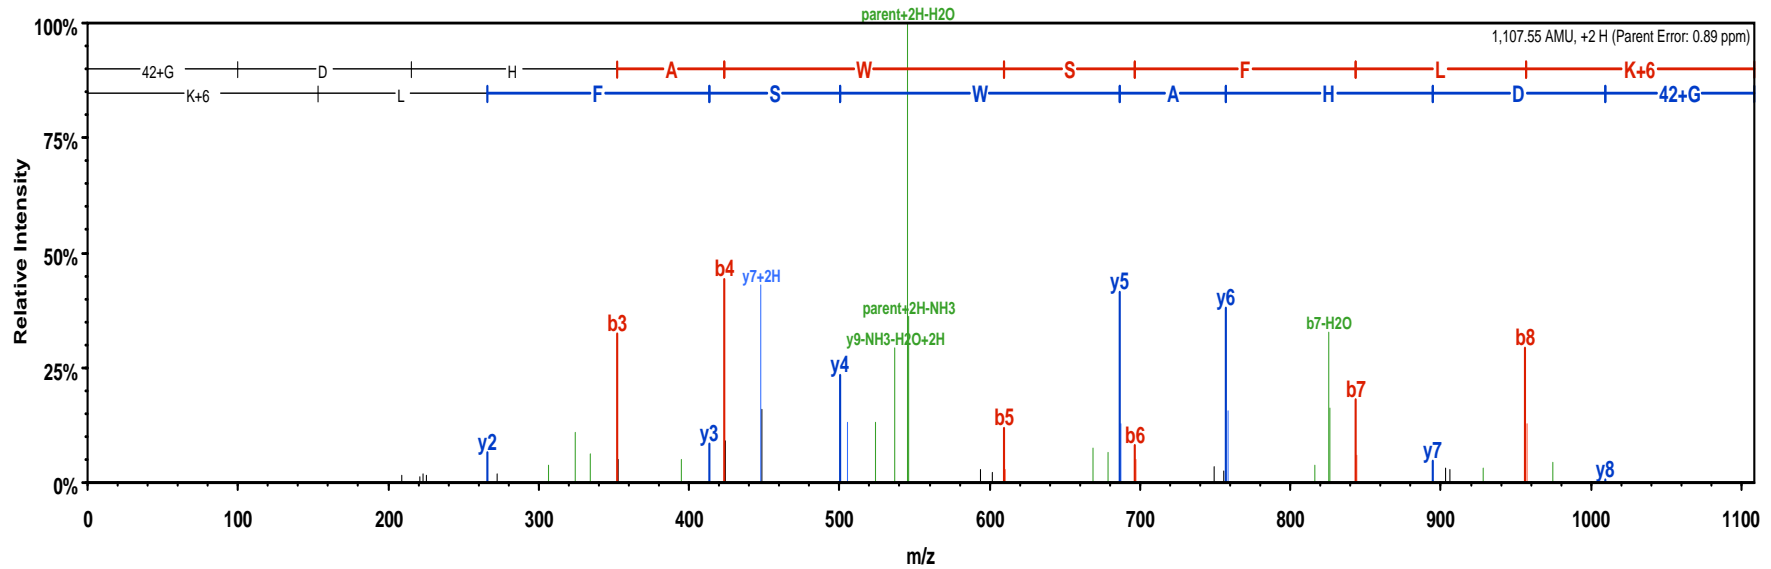

| ... | B Ions  | B+2H  | B-NH3   | B-H2O   | AA   | Y Ions  | Y+2H  | Y-NH3   | Y-H2O   | ... |
|-----|---------|-------|---------|---------|------|---------|-------|---------|---------|-----|
| 1   | 100.0   |       |         |         | G+42 | 1,108.6 | 554.8 | 1,091.5 | 1,090.5 | 9   |
| 2   | 215.1   |       |         | 197.1   | D    | 1,009.5 | 505.3 | 992.5   | 991.5   | 8   |
| 3   | 352.1   | 176.6 |         | 334.1   | H    | 894.5   | 447.8 | 877.5   | 876.5   | 7   |
| 4   | 423.2   | 212.1 |         | 405.2   | A    | 757.4   | 379.2 | 740.4   | 739.4   | 6   |
| 5   | 609.2   | 305.1 |         | 591.2   | W    | 686.4   |       | 669.4   | 668.4   | 5   |
| 6   | 696.3   | 348.6 |         | 678.3   | S    | 500.3   |       | 483.3   | 482.3   | 4   |
| 7   | 843.3   | 422.2 |         | 825.3   | F    | 413.3   |       | 396.3   |         | 3   |
| 8   | 956.4   | 478.7 |         | 938.4   | L    | 266.2   |       | 249.2   |         | 2   |
| 9   | 1,108.6 | 554.8 | 1,091.5 | 1,090.5 | K+6  | 153.1   |       | 136.1   |         | 1   |

# Nuclear proteome

| Protein No. | Leading protein name | Sequence         | Mascot Score | Variable Modifications | SILAC State | Charge | m/z       |
|-------------|----------------------|------------------|--------------|------------------------|-------------|--------|-----------|
| N-110       | sp Q14781 CBX2_HUMAN | LPPPLSAPVAGLAALK | 36.68        | Unmodified             | Heavy       | 2      | 757.96888 |

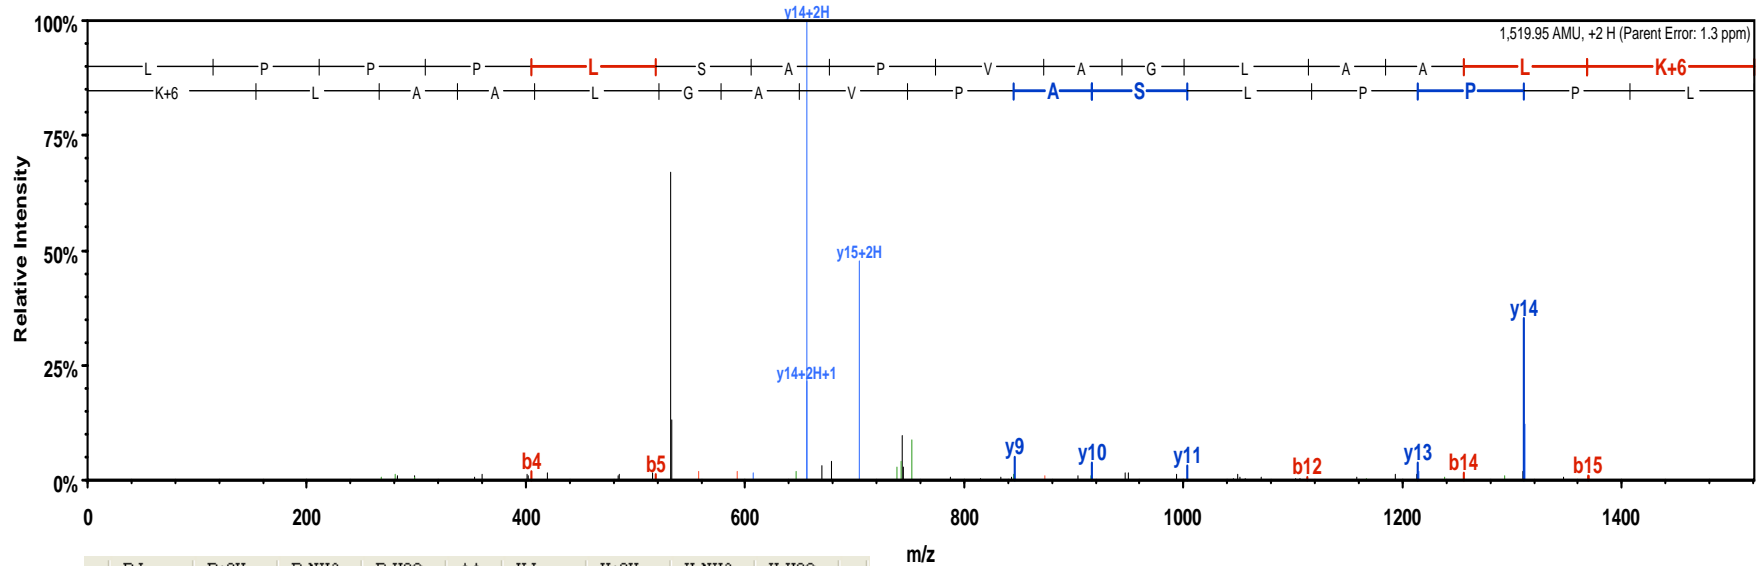

| ... | B Ions  | B+2H  | B-NH3   | B-H2O   | AA  | Y Ions  | Y+2H  | Y-NH3   | Y-H2O   | ... |
|-----|---------|-------|---------|---------|-----|---------|-------|---------|---------|-----|
| 1   | 114.1   |       |         |         | L   | 1,521.0 | 761.0 | 1,503.9 | 1,502.9 | 16  |
| 2   | 211.1   |       |         |         | P   | 1,407.9 | 704.4 | 1,390.8 | 1,389.9 | 15  |
| 3   | 308.2   |       |         |         | P   | 1,310.8 | 655.9 | 1,293.8 | 1,292.8 | 14  |
| 4   | 405.2   |       |         |         | P   | 1,213.8 | 607.4 | 1,196.7 | 1,195.8 | 13  |
| 5   | 518.3   |       |         |         | L   | 1,116.7 | 558.9 | 1,099.7 | 1,098.7 | 12  |
| 6   | 605.4   | 303.2 |         | 587.4   | S   | 1,003.6 | 502.3 | 986.6   | 985.6   | 11  |
| 7   | 676.4   | 338.7 |         | 658.4   | A   | 916.6   | 458.8 | 899.6   |         | 10  |
| 8   | 773.5   | 387.2 |         | 755.4   | P   | 845.6   | 423.3 | 828.5   |         | 9   |
| 9   | 872.5   | 436.8 |         | 854.5   | V   | 748.5   | 374.8 | 731.5   |         | 8   |
| 10  | 943.6   | 472.3 |         | 925.6   | A   | 649.4   | 325.2 | 632.4   |         | 7   |
| 11  | 1,000.6 | 500.8 |         | 982.6   | G   | 578.4   | 289.7 | 561.4   |         | 6   |
| 12  | 1,113.7 | 557.3 |         | 1,095.7 | L   | 521.4   |       | 504.3   |         | 5   |
| 13  | 1,184.7 | 592.9 |         | 1,166.7 | A   | 408.3   |       | 391.3   |         | 4   |
| 14  | 1,255.7 | 628.4 |         | 1,237.7 | A   | 337.3   |       | 320.2   |         | 3   |
| 15  | 1,368.8 | 684.9 |         | 1,350.8 | L   | 266.2   |       | 249.2   |         | 2   |
| 16  | 1,521.0 | 761.0 | 1,503.9 | 1,502.9 | K+6 | 153.1   |       | 136.1   |         | 1   |

# Nuclear proteome

| Protein No. | Leading protein name | Sequence          | Mascot Score | Variable Modifications  | SILAC State | Charge | m/z       |
|-------------|----------------------|-------------------|--------------|-------------------------|-------------|--------|-----------|
| N-111       | spP16402IH13_HUMAN   | SETAPLAPTIPAPAEEK | 36.53        | Acetyl (Protein N-term) | Heavy       | 2      | 817.93543 |

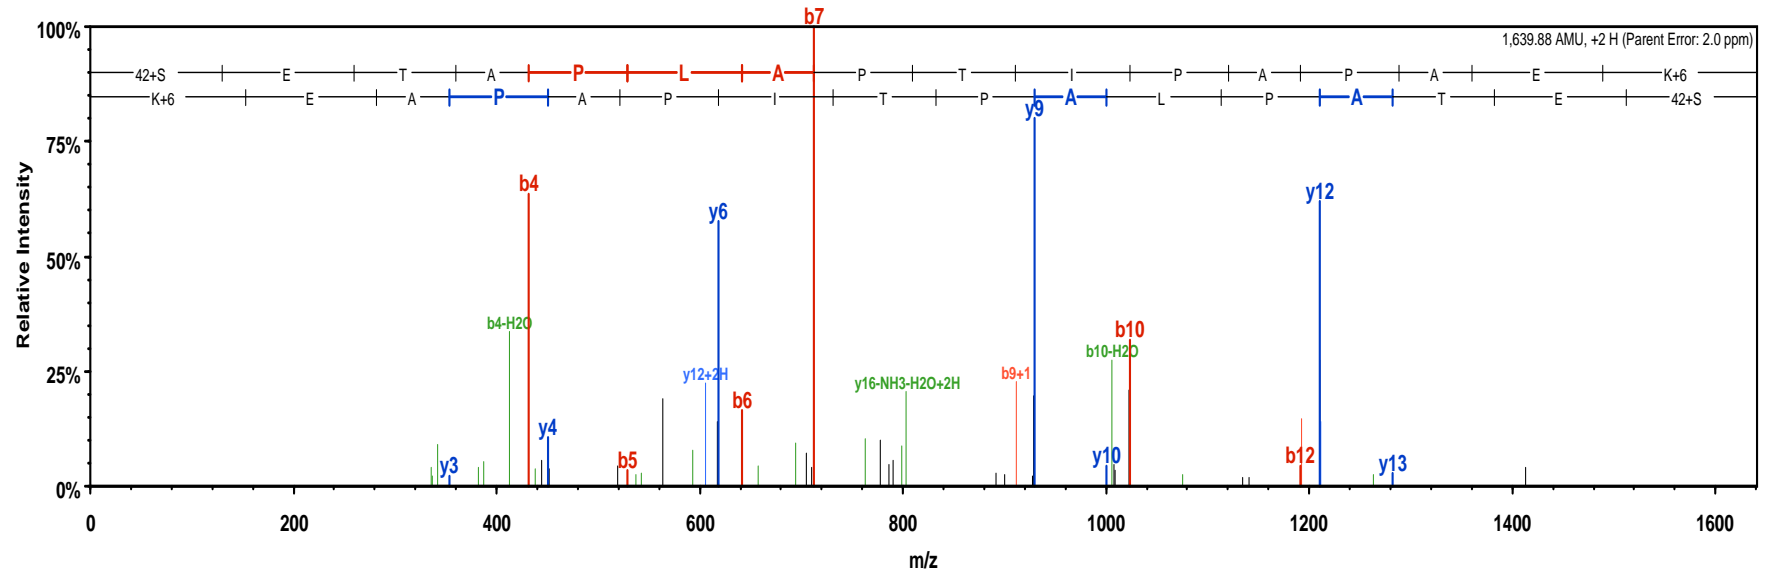

| ... | B Ions  | B+2H  | B-NH3   | B-H2O   | AA   | Y Ions  | Y+2H  | Y-NH3   | Y-H2O   | ... |
|-----|---------|-------|---------|---------|------|---------|-------|---------|---------|-----|
| 1   | 130.0   |       |         | 112.0   | S+42 | 1,640.9 | 820.9 | 1,623.9 | 1,622.9 | 16  |
| 2   | 259.1   |       |         | 241.1   | E    | 1,511.8 | 756.4 | 1,494.8 | 1,493.8 | 15  |
| 3   | 360.1   |       |         | 342.1   | T    | 1,382.8 | 691.9 | 1,365.8 | 1,364.8 | 14  |
| 4   | 431.2   |       |         | 413.2   | A    | 1,281.8 | 641.4 | 1,264.7 | 1,263.7 | 13  |
| 5   | 528.2   |       |         | 510.2   | P    | 1,210.7 | 605.9 | 1,193.7 | 1,192.7 | 12  |
| 6   | 641.3   | 321.2 |         | 623.3   | L    | 1,113.7 | 557.3 | 1,096.6 | 1,095.7 | 11  |
| 7   | 712.4   | 356.7 |         | 694.3   | A    | 1,000.6 | 500.8 | 983.6   | 982.6   | 10  |
| 8   | 809.4   | 405.2 |         | 791.4   | P    | 929.5   | 465.3 | 912.5   | 911.5   | 9   |
| 9   | 910.5   | 455.7 |         | 892.4   | T    | 832.5   | 416.7 | 815.5   | 814.5   | 8   |
| 10  | 1,023.5 | 512.3 |         | 1,005.5 | I    | 731.4   | 366.2 | 714.4   | 713.4   | 7   |
| 11  | 1,120.6 | 560.8 |         | 1,102.6 | P    | 618.4   | 309.7 | 601.3   | 600.3   | 6   |
| 12  | 1,191.6 | 596.3 |         | 1,173.6 | A    | 521.3   |       | 504.3   | 503.3   | 5   |
| 13  | 1,288.7 | 644.8 |         | 1,270.7 | P    | 450.3   |       | 433.2   | 432.3   | 4   |
| 14  | 1,359.7 | 680.4 |         | 1,341.7 | A    | 353.2   |       | 336.2   | 335.2   | 3   |
| 15  | 1,488.8 | 744.9 |         | 1,470.7 | E    | 282.2   |       | 265.1   | 264.2   | 2   |
| 16  | 1,640.9 | 820.9 | 1,623.9 | 1,622.9 | K+6  | 153.1   |       | 136.1   |         | 1   |



# Nuclear proteome

| Protein No. | Leading protein name  | Sequence    | Mascot Score | Variable Modifications | SILAC State | Charge | m/z       |
|-------------|-----------------------|-------------|--------------|------------------------|-------------|--------|-----------|
| N-112       | sp Q86W50 MET10_HUMAN | LPGVAGQYLFK | 36.3         | Unmodified             | Light       | 2      | 596.83987 |

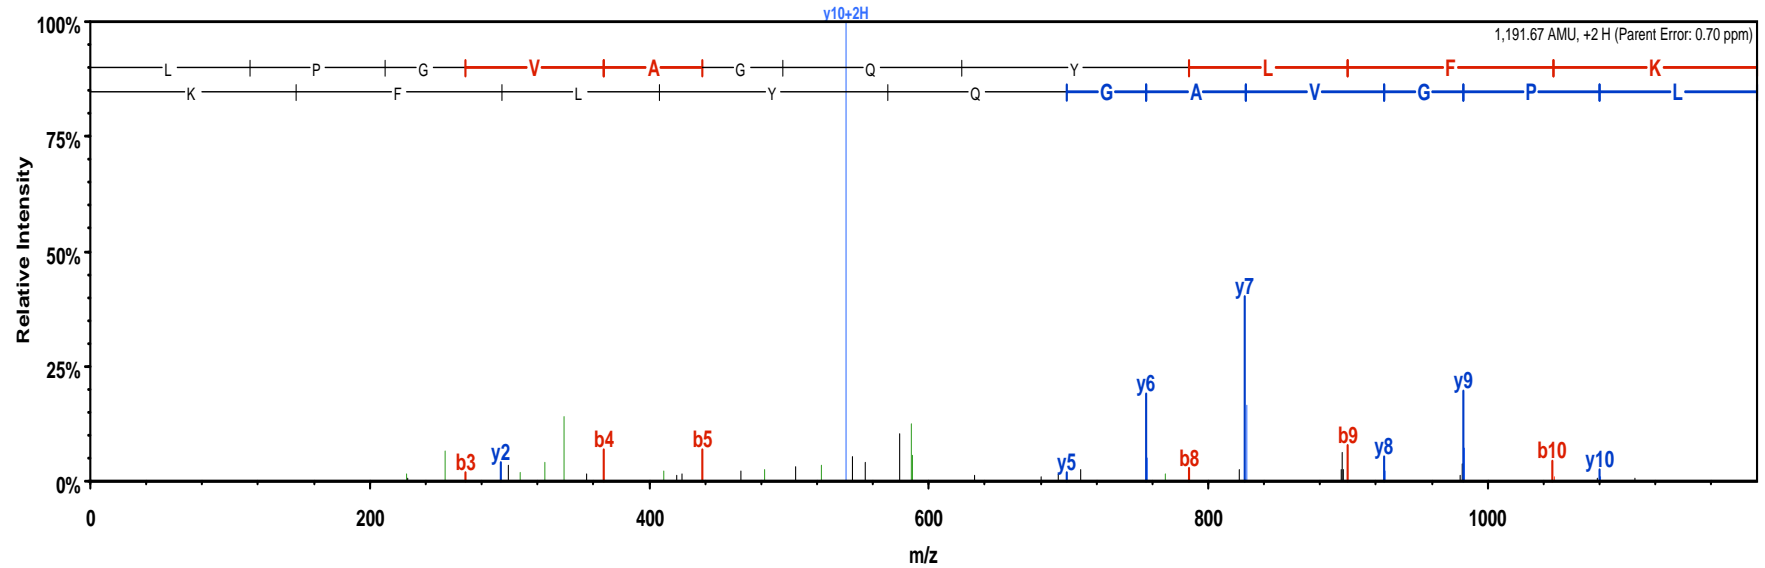

| ... | B Ions  | B+2H  | B-NH3   | B-H2O | AA | Y Ions  | Y+2H  | Y-NH3   | Y-H2O | ... |
|-----|---------|-------|---------|-------|----|---------|-------|---------|-------|-----|
| 1   | 114.1   |       |         |       | L  | 1,192.7 | 596.8 | 1,175.6 |       | 11  |
| 2   | 211.1   |       |         |       | P  | 1,079.6 | 540.3 | 1,062.6 |       | 10  |
| 3   | 268.2   |       |         |       | G  | 982.5   | 491.8 | 965.5   |       | 9   |
| 4   | 367.2   |       |         |       | V  | 925.5   | 463.3 | 908.5   |       | 8   |
| 5   | 438.3   |       |         |       | A  | 826.4   | 413.7 | 809.4   |       | 7   |
| 6   | 495.3   | 248.1 |         |       | G  | 755.4   | 378.2 | 738.4   |       | 6   |
| 7   | 623.4   | 312.2 | 606.3   |       | Q  | 698.4   |       | 681.4   |       | 5   |
| 8   | 786.4   | 393.7 | 769.4   |       | Y  | 570.3   |       | 553.3   |       | 4   |
| 9   | 899.5   | 450.3 | 882.5   |       | L  | 407.3   |       | 390.2   |       | 3   |
| 10  | 1,046.6 | 523.8 | 1,029.5 |       | F  | 294.2   |       | 277.2   |       | 2   |
| 11  | 1,192.7 | 596.8 | 1,175.6 |       | K  | 147.1   |       | 130.1   |       | 1   |

# Nuclear proteome

| Protein No. | Leading protein name   | Sequence        | Mascot Score | Variable Modifications | SILAC State | Charge | m/z       |
|-------------|------------------------|-----------------|--------------|------------------------|-------------|--------|-----------|
| N-113       | sp A6NCE7 IMP3B2_HUMAN | FLVPDHSVNMSELIK | 34.47        | Unmodified             | Light       | 2      | 821.43708 |

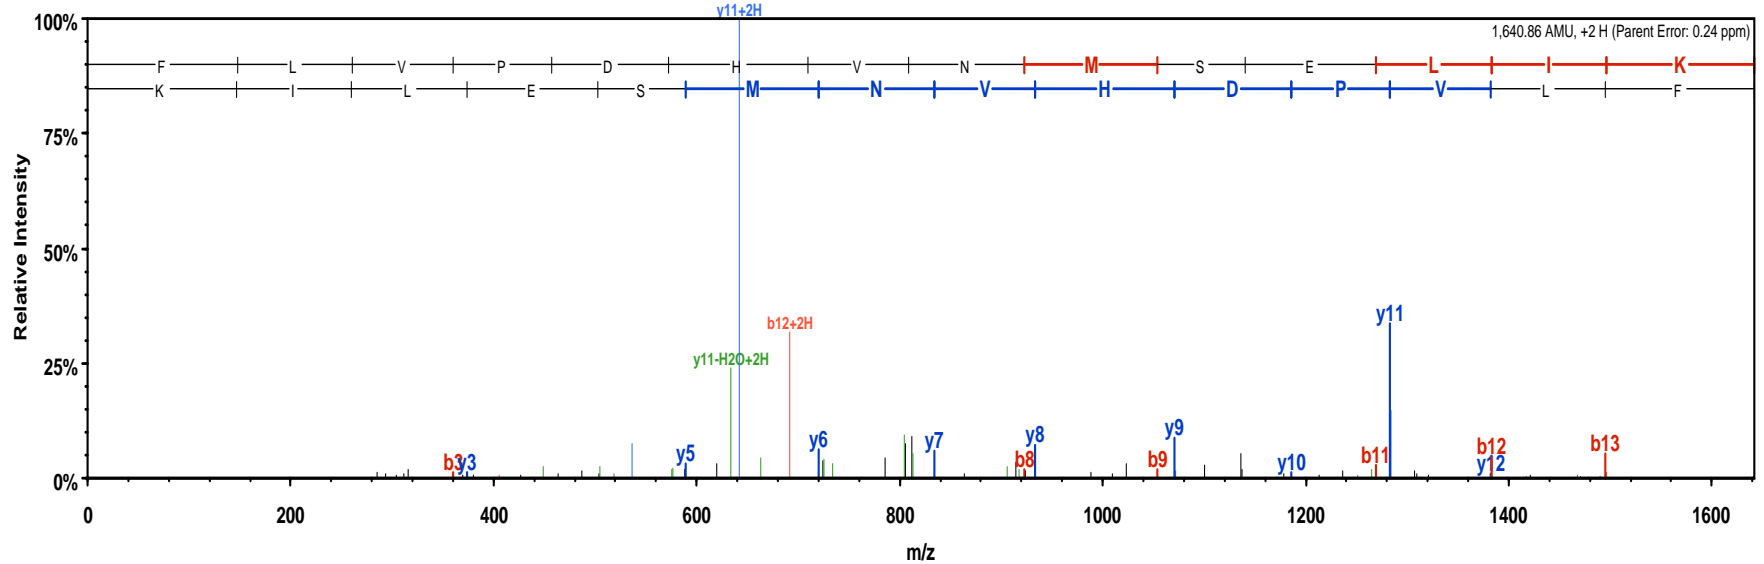

| ... | B Ions  | B+2H  | B-NH3   | B-H2O   | AA | Y Ions  | Y+2H  | Y-NH3   | Y-H2O   | ... |
|-----|---------|-------|---------|---------|----|---------|-------|---------|---------|-----|
| 1   | 148.1   |       |         |         | F  | 1,641.9 | 821.4 | 1,624.8 | 1,623.9 | 14  |
| 2   | 261.2   |       |         |         | L  | 1,494.8 | 747.9 | 1,477.8 | 1,476.8 | 13  |
| 3   | 360.2   |       |         |         | V  | 1,381.7 | 691.4 | 1,364.7 | 1,363.7 | 12  |
| 4   | 457.3   |       |         |         | P  | 1,282.6 | 641.8 | 1,265.6 | 1,264.6 | 11  |
| 5   | 572.3   |       |         | 554.3   | D  | 1,185.6 | 593.3 | 1,168.6 | 1,167.6 | 10  |
| 6   | 709.4   | 355.2 |         | 691.4   | H  | 1,070.6 | 535.8 | 1,053.5 | 1,052.6 | 9   |
| 7   | 808.4   | 404.7 |         | 790.4   | V  | 933.5   | 467.3 | 916.5   | 915.5   | 8   |
| 8   | 922.5   | 461.7 | 905.5   | 904.5   | N  | 834.4   | 417.7 | 817.4   | 816.4   | 7   |
| 9   | 1,053.5 | 527.3 | 1,036.5 | 1,035.5 | M  | 720.4   | 360.7 | 703.4   | 702.4   | 6   |
| 10  | 1,140.6 | 570.8 | 1,123.5 | 1,122.5 | S  | 589.4   |       | 572.3   | 571.3   | 5   |
| 11  | 1,269.6 | 635.3 | 1,252.6 | 1,251.6 | E  | 502.3   |       | 485.3   | 484.3   | 4   |
| 12  | 1,382.7 | 691.8 | 1,365.7 | 1,364.7 | L  | 373.3   |       | 356.3   |         | 3   |
| 13  | 1,495.8 | 748.4 | 1,478.7 | 1,477.8 | I  | 260.2   |       | 243.2   |         | 2   |
| 14  | 1,641.9 | 821.4 | 1,624.8 | 1,623.9 | K  | 147.1   |       | 130.1   |         | 1   |

# Nuclear proteome

| Protein No. | Leading protein name  | Sequence         | Mascot Score | Variable Modifications | SILAC State | Charge | m/z       |
|-------------|-----------------------|------------------|--------------|------------------------|-------------|--------|-----------|
| N-114       | sp Q86VZ2 WDR5B_HUMAN | LVSASDDKTLKLWDVR | 33.99        | Unmodified             | Light       | 2      | 923.50708 |

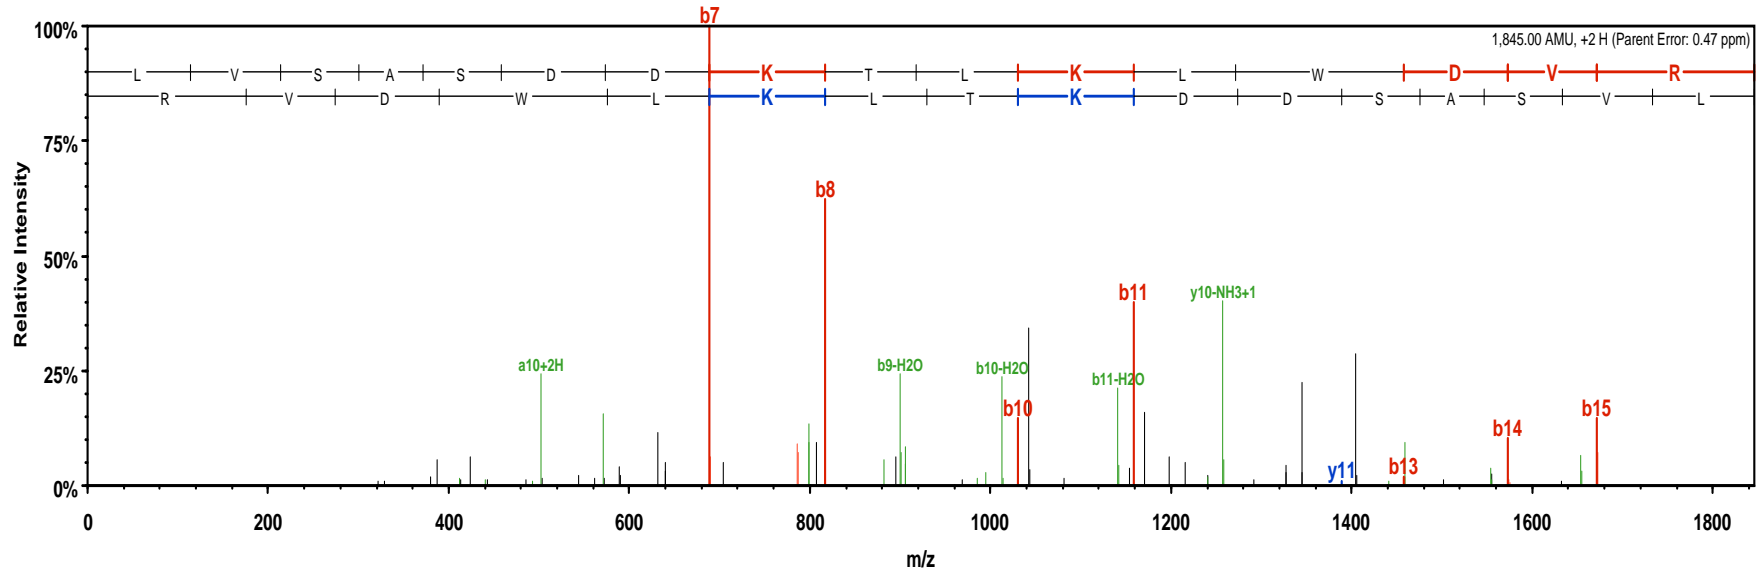

| ... | B Ions  | B+2H  | B-NH3   | B-H2O   | AA | Y Ions  | Y+2H  | Y-NH3   | Y-H2O   | ... |
|-----|---------|-------|---------|---------|----|---------|-------|---------|---------|-----|
| 1   | 114.1   |       |         |         | L  | 1,846.0 | 923.5 | 1,829.0 | 1,828.0 | 16  |
| 2   | 213.2   |       |         |         | V  | 1,732.9 | 867.0 | 1,715.9 | 1,714.9 | 15  |
| 3   | 300.2   |       |         | 282.2   | S  | 1,633.9 | 817.4 | 1,616.8 | 1,615.8 | 14  |
| 4   | 371.2   |       |         | 353.2   | A  | 1,546.8 | 773.9 | 1,529.8 | 1,528.8 | 13  |
| 5   | 458.3   |       |         | 440.3   | S  | 1,475.8 | 738.4 | 1,458.8 | 1,457.8 | 12  |
| 6   | 573.3   | 287.1 |         | 555.3   | D  | 1,388.8 | 694.9 | 1,371.7 | 1,370.7 | 11  |
| 7   | 688.3   | 344.7 |         | 670.3   | D  | 1,273.7 | 637.4 | 1,256.7 | 1,255.7 | 10  |
| 8   | 816.4   | 408.7 | 799.4   | 798.4   | K  | 1,158.7 | 579.9 | 1,141.7 | 1,140.7 | 9   |
| 9   | 917.5   | 459.2 | 900.4   | 899.4   | T  | 1,030.6 | 515.8 | 1,013.6 | 1,012.6 | 8   |
| 10  | 1,030.5 | 515.8 | 1,013.5 | 1,012.5 | L  | 929.6   | 465.3 | 912.5   | 911.5   | 7   |
| 11  | 1,158.6 | 579.8 | 1,141.6 | 1,140.6 | K  | 816.5   | 408.7 | 799.4   | 798.5   | 6   |
| 12  | 1,271.7 | 636.4 | 1,254.7 | 1,253.7 | L  | 688.4   |       | 671.4   | 670.4   | 5   |
| 13  | 1,457.8 | 729.4 | 1,440.8 | 1,439.8 | W  | 575.3   |       | 558.3   | 557.3   | 4   |
| 14  | 1,572.8 | 786.9 | 1,555.8 | 1,554.8 | D  | 389.2   |       | 372.2   | 371.2   | 3   |
| 15  | 1,671.9 | 836.5 | 1,654.9 | 1,653.9 | V  | 274.2   |       | 257.2   |         | 2   |
| 16  | 1,846.0 | 923.5 | 1,829.0 | 1,828.0 | R  | 175.1   |       | 158.1   |         | 1   |

# Nuclear proteome

| Protein No. | Leading protein name   | Sequence         | Mascot Score | Variable Modifications | SILAC State | Charge | m/z       |
|-------------|------------------------|------------------|--------------|------------------------|-------------|--------|-----------|
| N-115       | sp A4D1E1 HZ804B_HUMAN | HQEFDNHINSYDHAHK | 33.53        | Unmodified             | Heavy       | 3      | 664.62962 |

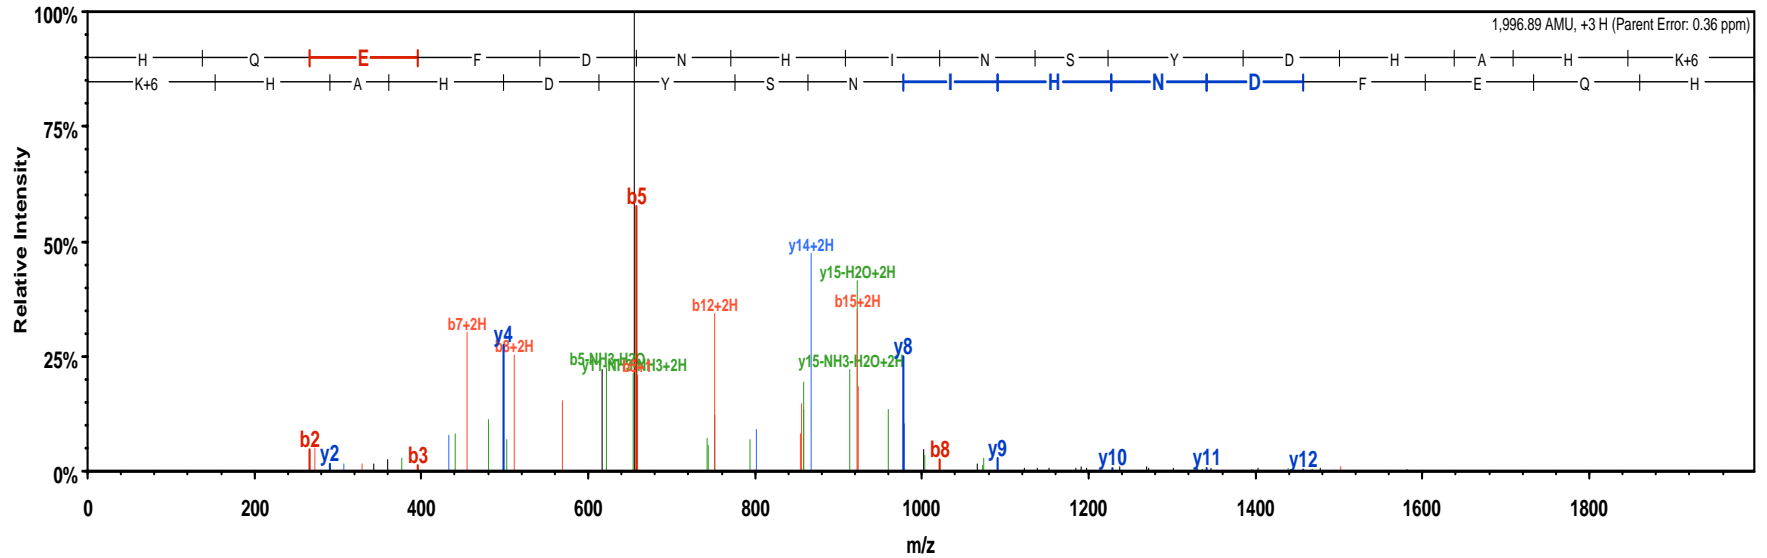

| ... | B Ions  | B+2H  | B-NH3   | B-H2O   | AA  | Y Ions  | Y+2H  | Y-NH3   | Y-H2O   | ... |
|-----|---------|-------|---------|---------|-----|---------|-------|---------|---------|-----|
| 1   | 138.1   | 69.5  |         |         | H   | 1,997.9 | 999.5 | 1,980.9 | 1,979.9 | 16  |
| 2   | 266.1   | 133.6 | 249.1   |         | Q   | 1,860.8 | 930.9 | 1,843.8 | 1,842.8 | 15  |
| 3   | 395.2   | 198.1 | 378.1   | 377.2   | E   | 1,732.8 | 866.9 | 1,715.8 | 1,714.8 | 14  |
| 4   | 542.2   | 271.6 | 525.2   | 524.2   | F   | 1,603.7 | 802.4 | 1,586.7 | 1,585.7 | 13  |
| 5   | 657.3   | 329.1 | 640.2   | 639.3   | D   | 1,456.7 | 728.8 | 1,439.6 | 1,438.7 | 12  |
| 6   | 771.3   | 386.2 | 754.3   | 753.3   | N   | 1,341.6 | 671.3 | 1,324.6 | 1,323.6 | 11  |
| 7   | 908.4   | 454.7 | 891.3   | 890.4   | H   | 1,227.6 | 614.3 | 1,210.6 | 1,209.6 | 10  |
| 8   | 1,021.4 | 511.2 | 1,004.4 | 1,003.4 | I   | 1,090.5 | 545.8 | 1,073.5 | 1,072.5 | 9   |
| 9   | 1,135.5 | 568.2 | 1,118.5 | 1,117.5 | N   | 977.5   | 489.2 | 960.4   | 959.4   | 8   |
| 10  | 1,222.5 | 611.8 | 1,205.5 | 1,204.5 | S   | 863.4   | 432.2 | 846.4   | 845.4   | 7   |
| 11  | 1,385.6 | 693.3 | 1,368.6 | 1,367.6 | Y   | 776.4   | 388.7 | 759.4   | 758.4   | 6   |
| 12  | 1,500.6 | 750.8 | 1,483.6 | 1,482.6 | D   | 613.3   | 307.2 | 596.3   | 595.3   | 5   |
| 13  | 1,637.7 | 819.3 | 1,620.6 | 1,619.7 | H   | 498.3   | 249.6 | 481.3   |         | 4   |
| 14  | 1,708.7 | 854.9 | 1,691.7 | 1,690.7 | A   | 361.2   | 181.1 | 344.2   |         | 3   |
| 15  | 1,845.8 | 923.4 | 1,828.7 | 1,827.8 | H   | 290.2   | 145.6 | 273.2   |         | 2   |
| 16  | 1,997.9 | 999.5 | 1,980.9 | 1,979.9 | K+6 | 153.1   |       | 136.1   |         | 1   |

# Nuclear proteome

| Protein No. | Leading protein name   | Sequence   | Mascot Score | Variable Modifications  | SILAC State | Charge | m/z       |
|-------------|------------------------|------------|--------------|-------------------------|-------------|--------|-----------|
| N-116       | sp Q5HYJ3 IFA76B_HUMAN | AASALYACTK | 33.12        | Acetyl (Protein N-term) | Heavy       | 2      | 549.26842 |

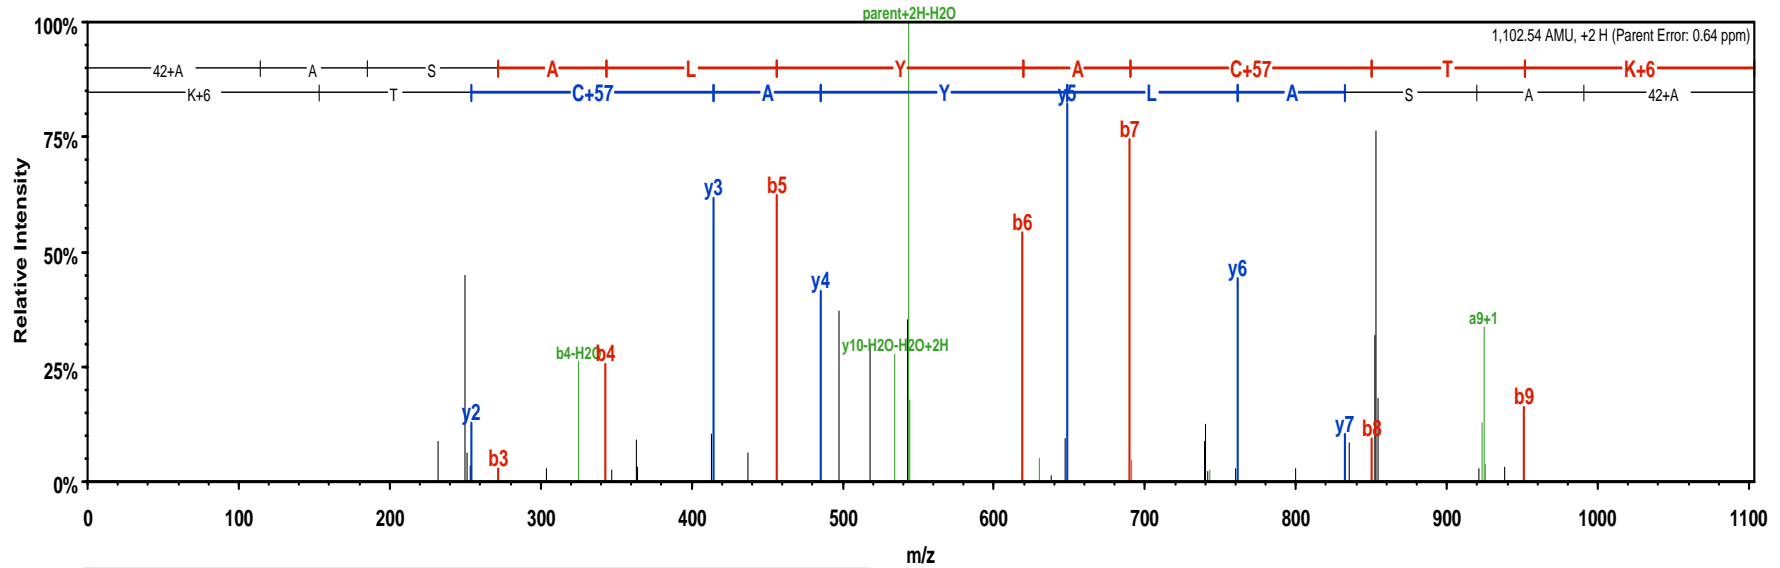

| ... | B Ions  | B+2H  | B-NH3   | B-H2O   | AA   | Y Ions  | Y+2H  | Y-NH3   | Y-H2O   | ... |
|-----|---------|-------|---------|---------|------|---------|-------|---------|---------|-----|
| 1   | 114.1   |       |         |         | A+42 | 1,103.5 | 552.3 | 1,086.5 | 1,085.5 | 10  |
| 2   | 185.1   |       |         |         | A    | 990.5   | 495.8 | 973.5   | 972.5   | 9   |
| 3   | 272.1   |       |         | 254.1   | S    | 919.5   | 460.2 | 902.4   | 901.5   | 8   |
| 4   | 343.2   |       |         | 325.2   | A    | 832.4   | 416.7 | 815.4   | 814.4   | 7   |
| 5   | 456.2   |       |         | 438.2   | L    | 761.4   | 381.2 | 744.4   | 743.4   | 6   |
| 6   | 619.3   | 310.2 |         | 601.3   | Y    | 648.3   |       | 631.3   | 630.3   | 5   |
| 7   | 690.3   | 345.7 |         | 672.3   | A    | 485.2   |       | 468.2   | 467.2   | 4   |
| 8   | 850.4   | 425.7 |         | 832.4   | C+57 | 414.2   |       | 397.2   | 396.2   | 3   |
| 9   | 951.4   | 476.2 |         | 933.4   | T    | 254.2   |       | 237.2   | 236.2   | 2   |
| 10  | 1,103.5 | 552.3 | 1,086.5 | 1,085.5 | K+6  | 153.1   |       | 136.1   |         | 1   |

# Nuclear proteome

| Protein No. | Leading protein name  | Sequence      | Mascot Score | Variable Modifications | SILAC State | Charge | m/z       |
|-------------|-----------------------|---------------|--------------|------------------------|-------------|--------|-----------|
| N-117       | sp Q5RI15 FA36A_HUMAN | ILYEGTHLDPERK | 32.87        | Unmodified             | Heavy       | 2      | 785.91483 |

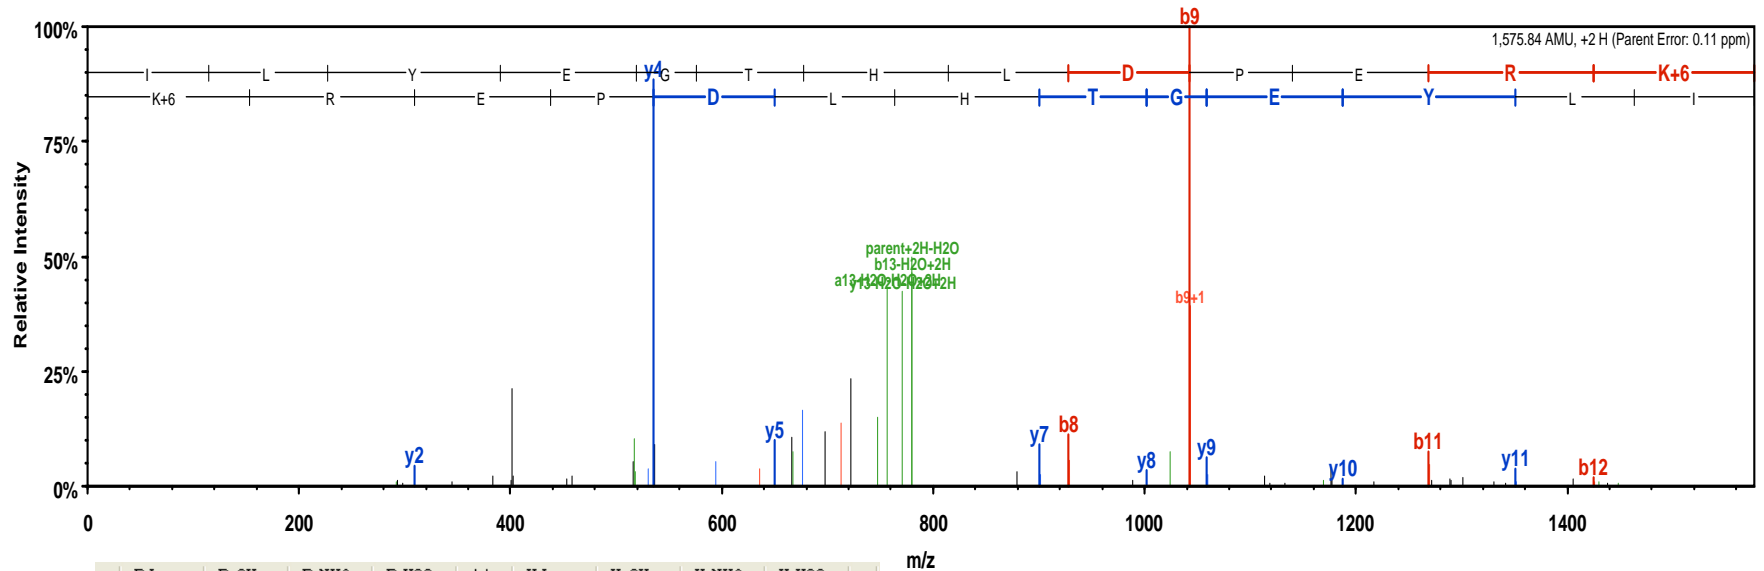

| ... | B Ions  | B+2H  | B-NH3   | B-H2O   | AA  | Y Ions  | Y+2H  | Y-MH3   | Y-H2O   | ... |
|-----|---------|-------|---------|---------|-----|---------|-------|---------|---------|-----|
| 1   | 114.1   |       |         |         | I   | 1,576.8 | 788.9 | 1,559.8 | 1,558.8 | 13  |
| 2   | 227.2   |       |         |         | L   | 1,463.8 | 732.4 | 1,446.7 | 1,445.7 | 12  |
| 3   | 390.2   |       |         |         | Y   | 1,350.7 | 675.8 | 1,333.6 | 1,332.7 | 11  |
| 4   | 519.3   |       |         | 501.3   | E   | 1,187.6 | 594.3 | 1,170.6 | 1,169.6 | 10  |
| 5   | 576.3   |       |         | 558.3   | G   | 1,058.6 | 529.8 | 1,041.5 | 1,040.6 | 9   |
| 6   | 677.4   | 339.2 |         | 659.3   | T   | 1,001.5 | 501.3 | 984.5   | 983.5   | 8   |
| 7   | 814.4   | 407.7 |         | 796.4   | H   | 900.5   | 450.8 | 883.5   | 882.5   | 7   |
| 8   | 927.5   | 464.3 |         | 909.5   | L   | 763.4   | 382.2 | 746.4   | 745.4   | 6   |
| 9   | 1,042.5 | 521.8 |         | 1,024.5 | D   | 650.4   | 325.7 | 633.3   | 632.3   | 5   |
| 10  | 1,139.6 | 570.3 |         | 1,121.6 | P   | 535.3   | 268.2 | 518.3   | 517.3   | 4   |
| 11  | 1,268.6 | 634.8 |         | 1,250.6 | E   | 438.3   | 219.6 | 421.3   | 420.3   | 3   |
| 12  | 1,424.7 | 712.9 | 1,407.7 | 1,406.7 | R   | 309.2   | 155.1 | 292.2   |         | 2   |
| 13  | 1,576.8 | 788.9 | 1,559.8 | 1,558.8 | K+6 | 153.1   |       | 136.1   |         | 1   |

# Nuclear proteome

| Protein No. | Leading protein name  | Sequence       | Mascot Score | Variable Modifications | SILAC State | Charge | m/z       |
|-------------|-----------------------|----------------|--------------|------------------------|-------------|--------|-----------|
| N-118       | sp Q9H1X3 DJC25_HUMAN | SKEEIRDEEENIIK | 31.92        | Unmodified             | Light       | 2      | 866.44161 |

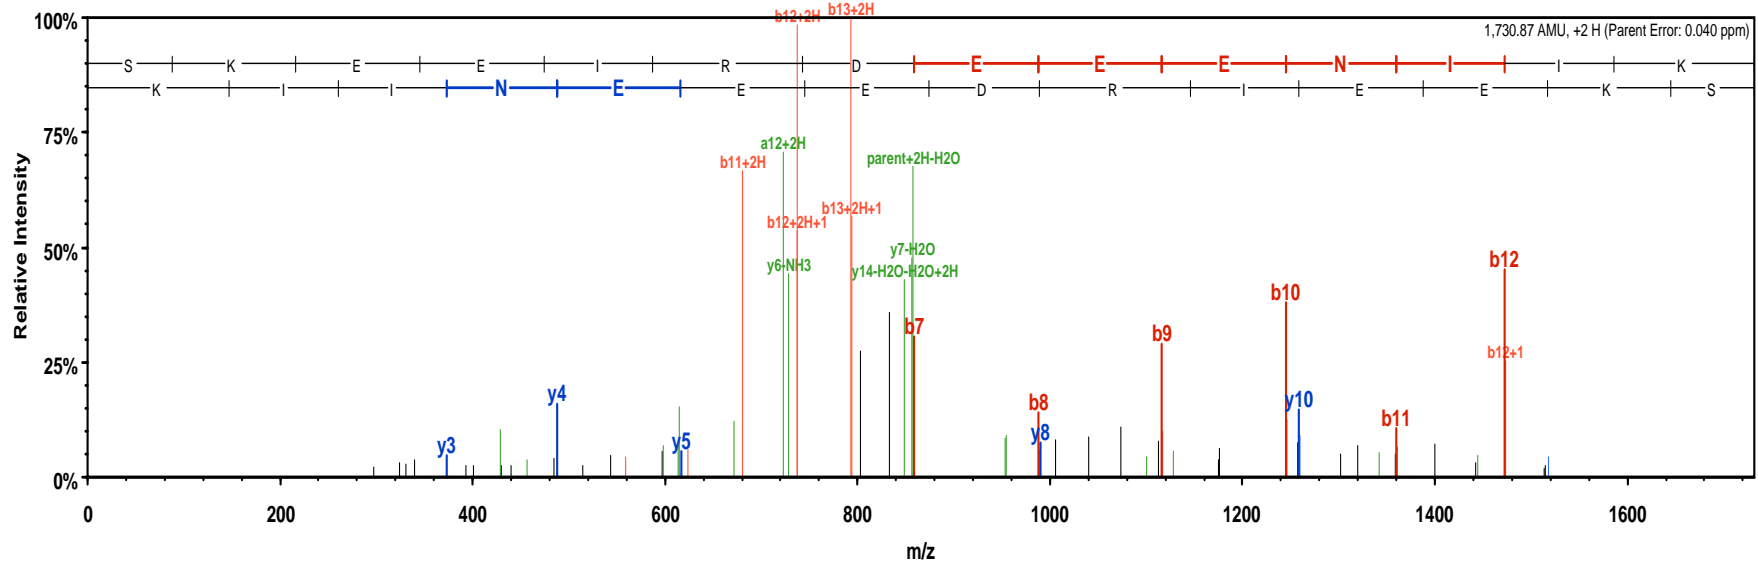

| ... | B Ions  | B+2H  | B-NH3   | B-H2O   | AA | Y Ions  | Y+2H  | Y-NH3   | Y-H2O   | ... |
|-----|---------|-------|---------|---------|----|---------|-------|---------|---------|-----|
| 1   | 88.0    |       |         | 70.0    | S  | 1,731.9 | 866.4 | 1,714.8 | 1,713.9 | 14  |
| 2   | 216.1   | 108.6 | 199.1   | 198.1   | K  | 1,644.8 | 822.9 | 1,627.8 | 1,626.8 | 13  |
| 3   | 345.2   | 173.1 | 328.2   | 327.2   | E  | 1,516.7 | 758.9 | 1,499.7 | 1,498.7 | 12  |
| 4   | 474.2   | 237.6 | 457.2   | 456.2   | E  | 1,387.7 | 694.4 | 1,370.7 | 1,369.7 | 11  |
| 5   | 587.3   | 294.2 | 570.3   | 569.3   | I  | 1,258.7 | 629.8 | 1,241.6 | 1,240.7 | 10  |
| 6   | 743.4   | 372.2 | 726.4   | 725.4   | R  | 1,145.6 | 573.3 | 1,128.6 | 1,127.6 | 9   |
| 7   | 858.4   | 429.7 | 841.4   | 840.4   | D  | 989.5   | 495.2 | 972.5   | 971.5   | 8   |
| 8   | 987.5   | 494.2 | 970.4   | 969.5   | E  | 874.5   | 437.7 | 857.4   | 856.4   | 7   |
| 9   | 1,116.5 | 558.8 | 1,099.5 | 1,098.5 | E  | 745.4   | 373.2 | 728.4   | 727.4   | 6   |
| 10  | 1,245.6 | 623.3 | 1,228.5 | 1,227.5 | E  | 616.4   |       | 599.3   | 598.4   | 5   |
| 11  | 1,359.6 | 680.3 | 1,342.6 | 1,341.6 | N  | 487.3   |       | 470.3   |         | 4   |
| 12  | 1,472.7 | 736.8 | 1,455.7 | 1,454.7 | I  | 373.3   |       | 356.3   |         | 3   |
| 13  | 1,585.8 | 793.4 | 1,568.7 | 1,567.8 | I  | 260.2   |       | 243.2   |         | 2   |
| 14  | 1,731.9 | 866.4 | 1,714.8 | 1,713.9 | K  | 147.1   |       | 130.1   |         | 1   |

# Nuclear proteome

| Protein No. | Leading protein name | Sequence              | Mascot Score | Variable Modifications | SILAC State | Charge | m/z       |
|-------------|----------------------|-----------------------|--------------|------------------------|-------------|--------|-----------|
| N-119       | sp O43314 VIP2_HUMAN | ASSKPATSGPSSAVVPNTSSR | 31.91        | Unmodified             | Light       | 3      | 663.33963 |

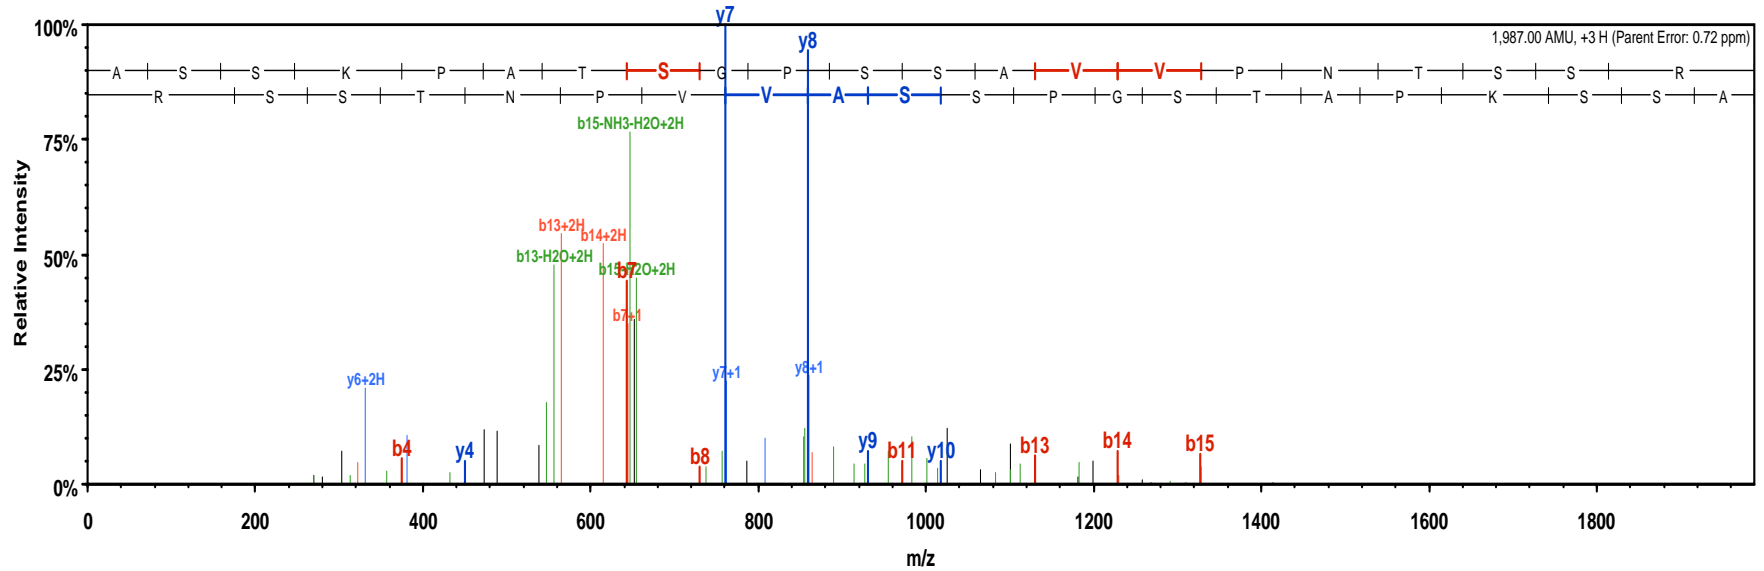

| ... | B Ions  | B+2H  | B-NH3   | B-H2O   | AA | Y Ions  | Y+2H  | Y-NH3   | Y-H2O   | ... |
|-----|---------|-------|---------|---------|----|---------|-------|---------|---------|-----|
| 1   | 72.0    |       |         |         | A  | 1,988.0 | 994.5 | 1,971.0 | 1,970.0 | 21  |
| 2   | 159.1   |       |         | 141.1   | S  | 1,917.0 | 959.0 | 1,899.9 | 1,899.0 | 20  |
| 3   | 246.1   |       |         | 228.1   | S  | 1,829.9 | 915.5 | 1,812.9 | 1,811.9 | 19  |
| 4   | 374.2   | 187.6 | 357.2   | 356.2   | K  | 1,742.9 | 872.0 | 1,725.9 | 1,724.9 | 18  |
| 5   | 471.3   | 236.1 | 454.2   | 453.2   | P  | 1,614.8 | 807.9 | 1,597.8 | 1,596.8 | 17  |
| 6   | 542.3   | 271.7 | 525.3   | 524.3   | A  | 1,517.8 | 759.4 | 1,500.7 | 1,499.7 | 16  |
| 7   | 643.3   | 322.2 | 626.3   | 625.3   | T  | 1,446.7 | 723.9 | 1,429.7 | 1,428.7 | 15  |
| 8   | 730.4   | 365.7 | 713.3   | 712.4   | S  | 1,345.7 | 673.3 | 1,328.6 | 1,327.7 | 14  |
| 9   | 787.4   | 394.2 | 770.4   | 769.4   | G  | 1,258.6 | 629.8 | 1,241.6 | 1,240.6 | 13  |
| 10  | 884.4   | 442.7 | 867.4   | 866.4   | P  | 1,201.6 | 601.3 | 1,184.6 | 1,183.6 | 12  |
| 11  | 971.5   | 486.2 | 954.5   | 953.5   | S  | 1,104.6 | 552.8 | 1,087.5 | 1,086.6 | 11  |
| 12  | 1,058.5 | 529.8 | 1,041.5 | 1,040.5 | S  | 1,017.5 | 509.3 | 1,000.5 | 999.5   | 10  |
| 13  | 1,129.5 | 565.3 | 1,112.5 | 1,111.5 | A  | 930.5   | 465.8 | 913.5   | 912.5   | 9   |
| 14  | 1,228.6 | 614.8 | 1,211.6 | 1,210.6 | V  | 859.5   | 430.2 | 842.4   | 841.5   | 8   |
| 15  | 1,327.7 | 664.3 | 1,310.7 | 1,309.7 | V  | 760.4   | 380.7 | 743.4   | 742.4   | 7   |
| 16  | 1,424.7 | 712.9 | 1,407.7 | 1,406.7 | P  | 661.3   | 331.2 | 644.3   | 643.3   | 6   |
| 17  | 1,538.8 | 769.9 | 1,521.8 | 1,520.8 | N  | 564.3   |       | 547.2   | 546.3   | 5   |
| 18  | 1,639.8 | 820.4 | 1,622.8 | 1,621.8 | T  | 450.2   |       | 433.2   | 432.2   | 4   |
| 19  | 1,726.9 | 863.9 | 1,709.8 | 1,708.8 | S  | 349.2   |       | 332.2   | 331.2   | 3   |
| 20  | 1,813.9 | 907.4 | 1,796.9 | 1,795.9 | S  | 262.2   |       | 245.1   | 244.1   | 2   |
| 21  | 1,988.0 | 994.5 | 1,971.0 | 1,970.0 | R  | 175.1   |       | 158.1   |         | 1   |



# Nuclear proteome

| Protein No. | Leading protein name | Sequence | Mascot Score | Variable Modifications | SILAC State | Charge | m/z       |
|-------------|----------------------|----------|--------------|------------------------|-------------|--------|-----------|
| N-120       | sp P15882 CHIN_HUMAN | LVVELLIK | 31.91        | Unmodified             | Heavy       | 2      | 463.81788 |

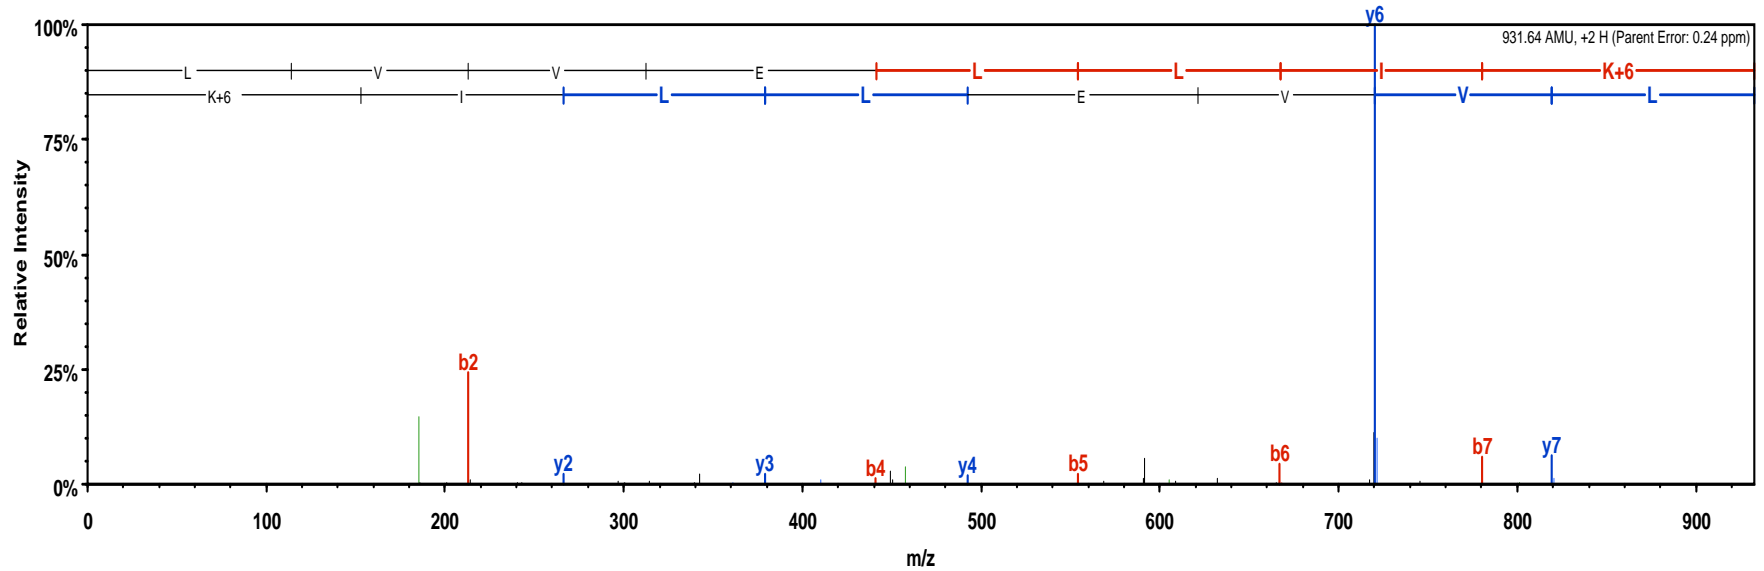

| ... | B Ions | B+2H  | B-NH3 | B-H2O | AA  | Y Ions | Y+2H  | Y-NH3 | Y-H2O | ... |
|-----|--------|-------|-------|-------|-----|--------|-------|-------|-------|-----|
| 1   | 114.1  |       |       |       | L   | 932.6  | 466.8 | 915.6 | 914.6 | 8   |
| 2   | 213.2  |       |       |       | V   | 819.6  | 410.3 | 802.5 | 801.6 | 7   |
| 3   | 312.2  |       |       |       | V   | 720.5  | 360.8 | 703.5 | 702.5 | 6   |
| 4   | 441.3  |       |       | 423.3 | E   | 621.4  |       | 604.4 | 603.4 | 5   |
| 5   | 554.4  |       |       | 536.3 | L   | 492.4  |       | 475.4 |       | 4   |
| 6   | 667.4  | 334.2 |       | 649.4 | L   | 379.3  |       | 362.3 |       | 3   |
| 7   | 780.5  | 390.8 |       | 762.5 | I   | 266.2  |       | 249.2 |       | 2   |
| 8   | 932.6  | 466.8 | 915.6 | 914.6 | K+6 | 153.1  |       | 136.1 |       | 1   |

# Nuclear proteome

| Protein No. | Leading protein name | Sequence    | Mascot Score | Variable Modifications | SILAC State | Charge | m/z       |
|-------------|----------------------|-------------|--------------|------------------------|-------------|--------|-----------|
| N-121       | sp Q8N9N5 BANP_HUMAN | IPCLLAPSVFK | 31.54        | Unmodified             | Light       | 2      | 622.85721 |

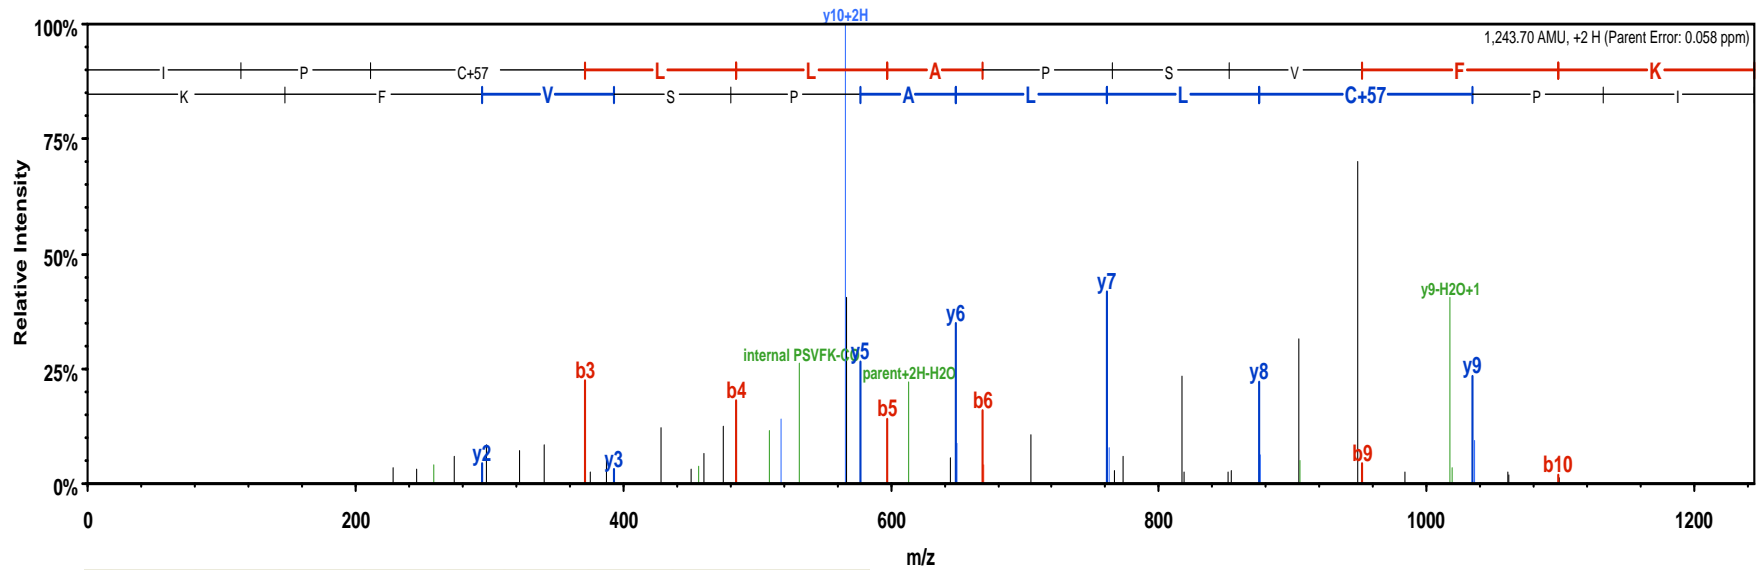

| ... | B Ions  | B+2H  | B-NH3   | B-H2O   | AA   | Y Ions  | Y+2H  | Y-NH3   | Y-H2O   | ... |
|-----|---------|-------|---------|---------|------|---------|-------|---------|---------|-----|
| 1   | 114.1   |       |         |         | I    | 1,244.7 | 622.9 | 1,227.7 | 1,226.7 | 11  |
| 2   | 211.1   |       |         |         | P    | 1,131.6 | 566.3 | 1,114.6 | 1,113.6 | 10  |
| 3   | 371.2   |       |         |         | C+57 | 1,034.6 | 517.8 | 1,017.5 | 1,016.6 | 9   |
| 4   | 484.3   |       |         |         | L    | 874.5   | 437.8 | 857.5   | 856.5   | 8   |
| 5   | 597.3   |       |         |         | L    | 761.5   | 381.2 | 744.4   | 743.4   | 7   |
| 6   | 668.4   | 334.7 |         |         | A    | 648.4   | 324.7 | 631.3   | 630.4   | 6   |
| 7   | 765.4   | 383.2 |         |         | P    | 577.3   |       | 560.3   | 559.3   | 5   |
| 8   | 852.5   | 426.7 |         | 834.5   | S    | 480.3   |       | 463.3   | 462.3   | 4   |
| 9   | 951.5   | 476.3 |         | 933.5   | V    | 393.2   |       | 376.2   |         | 3   |
| 10  | 1,098.6 | 549.8 |         | 1,080.6 | F    | 294.2   |       | 277.2   |         | 2   |
| 11  | 1,244.7 | 622.9 | 1,227.7 | 1,226.7 | K    | 147.1   |       | 130.1   |         | 1   |

# Nuclear proteome

| Protein No. | Leading protein name  | Sequence           | Mascot Score | Variable Modifications  | SILAC State | Charge | m/z       |
|-------------|-----------------------|--------------------|--------------|-------------------------|-------------|--------|-----------|
| N-122       | sp Q9Y241 HIG1A_HUMAN | STDTGVSLPSYEEDQGSK | 30.56        | Acetyl (Protein N-term) | Light       | 2      | 971.43163 |

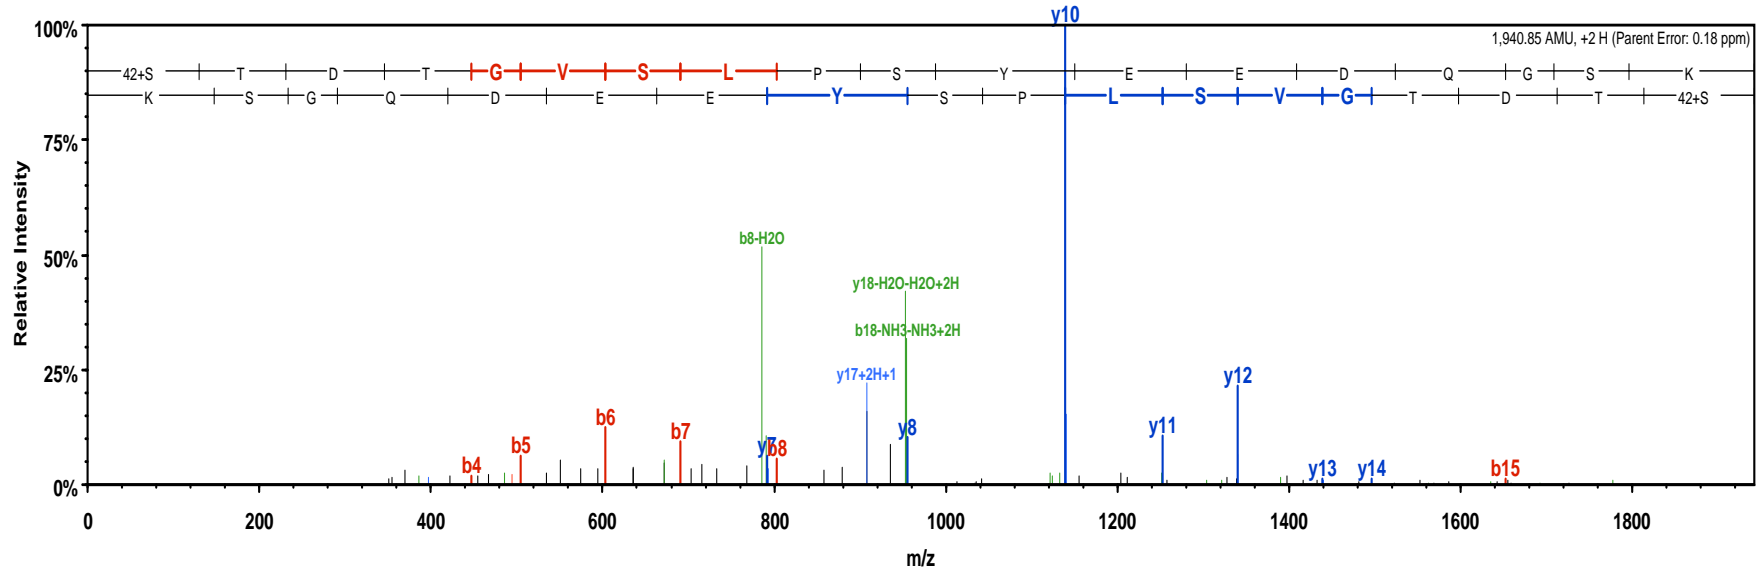

| ... | B Ions  | B+2H  | B-NH3   | B-H2O   | AA   | Y Ions  | Y+2H  | Y-NH3   | Y-H2O   | ... |
|-----|---------|-------|---------|---------|------|---------|-------|---------|---------|-----|
| 1   | 130.0   |       |         | 112.0   | S+42 | 1,941.9 | 971.4 | 1,924.8 | 1,923.8 | 18  |
| 2   | 231.1   |       |         | 213.1   | T    | 1,812.8 | 906.9 | 1,795.8 | 1,794.8 | 17  |
| 3   | 346.1   |       |         | 328.1   | D    | 1,711.8 | 856.4 | 1,694.7 | 1,693.8 | 16  |
| 4   | 447.2   |       |         | 429.2   | T    | 1,596.7 | 798.9 | 1,579.7 | 1,578.7 | 15  |
| 5   | 504.2   |       |         | 486.2   | G    | 1,495.7 | 748.3 | 1,478.7 | 1,477.7 | 14  |
| 6   | 603.3   | 302.1 |         | 585.3   | V    | 1,438.7 | 719.8 | 1,421.6 | 1,420.7 | 13  |
| 7   | 690.3   | 345.7 |         | 672.3   | S    | 1,339.6 | 670.3 | 1,322.6 | 1,321.6 | 12  |
| 8   | 803.4   | 402.2 |         | 785.4   | L    | 1,252.6 | 626.8 | 1,235.5 | 1,234.6 | 11  |
| 9   | 900.4   | 450.7 |         | 882.4   | P    | 1,139.5 | 570.2 | 1,122.5 | 1,121.5 | 10  |
| 10  | 987.5   | 494.2 |         | 969.5   | S    | 1,042.4 | 521.7 | 1,025.4 | 1,024.4 | 9   |
| 11  | 1,150.5 | 575.8 |         | 1,132.5 | Y    | 955.4   | 478.2 | 938.4   | 937.4   | 8   |
| 12  | 1,279.6 | 640.3 |         | 1,261.6 | E    | 792.3   | 396.7 | 775.3   | 774.3   | 7   |
| 13  | 1,408.6 | 704.8 |         | 1,390.6 | E    | 663.3   | 332.2 | 646.3   | 645.3   | 6   |
| 14  | 1,523.6 | 762.3 |         | 1,505.6 | D    | 534.3   |       | 517.2   | 516.2   | 5   |
| 15  | 1,651.7 | 826.4 | 1,634.7 | 1,633.7 | Q    | 419.2   |       | 402.2   | 401.2   | 4   |
| 16  | 1,708.7 | 854.9 | 1,691.7 | 1,690.7 | G    | 291.2   |       | 274.1   | 273.2   | 3   |
| 17  | 1,795.8 | 898.4 | 1,778.7 | 1,777.7 | S    | 234.1   |       | 217.1   | 216.1   | 2   |
| 18  | 1,941.9 | 971.4 | 1,924.8 | 1,923.8 | K    | 147.1   |       | 130.1   |         | 1   |

# Nuclear proteome

| Protein No. | Leading protein name  | Sequence   | Mascot Score | Variable Modifications | SILAC State | Charge | m/z       |
|-------------|-----------------------|------------|--------------|------------------------|-------------|--------|-----------|
| N-123       | sp P62861 IRS30_HUMAN | FNVVVPTFGK | 30.3         | Unmodified             | Light       | 2      | 554.31349 |

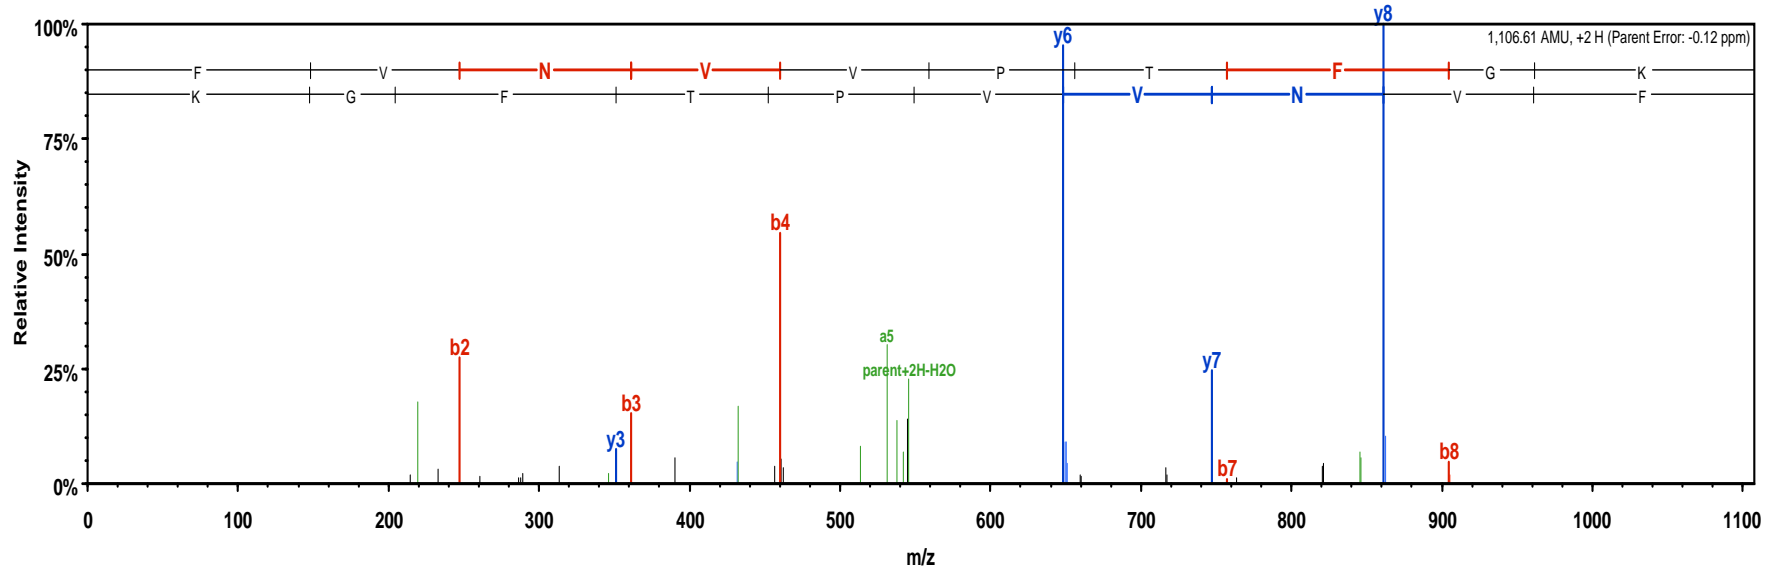

| ... | B Ions  | B+2H  | B-NH3   | B-H2O   | AA | Y Ions  | Y+2H  | Y-NH3   | Y-H2O   | ... |
|-----|---------|-------|---------|---------|----|---------|-------|---------|---------|-----|
| 1   | 148.1   |       |         |         | F  | 1,107.6 | 554.3 | 1,090.6 | 1,089.6 | 10  |
| 2   | 247.1   |       |         |         | V  | 960.6   | 480.8 | 943.5   | 942.5   | 9   |
| 3   | 361.2   |       | 344.2   |         | N  | 861.5   | 431.2 | 844.5   | 843.5   | 8   |
| 4   | 460.3   |       | 443.2   |         | V  | 747.4   | 374.2 | 730.4   | 729.4   | 7   |
| 5   | 559.3   |       | 542.3   |         | V  | 648.4   | 324.7 | 631.3   | 630.4   | 6   |
| 6   | 656.4   | 328.7 | 639.4   |         | P  | 549.3   |       | 532.3   | 531.3   | 5   |
| 7   | 757.4   | 379.2 | 740.4   | 739.4   | T  | 452.3   |       | 435.2   | 434.2   | 4   |
| 8   | 904.5   | 452.8 | 887.5   | 886.5   | F  | 351.2   |       | 334.2   |         | 3   |
| 9   | 961.5   | 481.3 | 944.5   | 943.5   | G  | 204.1   |       | 187.1   |         | 2   |
| 10  | 1,107.6 | 554.3 | 1,090.6 | 1,089.6 | K  | 147.1   |       | 130.1   |         | 1   |

# Nuclear proteome

| Protein No. | Leading protein name  | Sequence  | Mascot Score | Variable Modifications | SILAC State | Charge | m/z       |
|-------------|-----------------------|-----------|--------------|------------------------|-------------|--------|-----------|
| N-124       | sp Q96K76 UBP47_HUMAN | FLLDAVFAK | 30.29        | Unmodified             | Light       | 2      | 512.29731 |

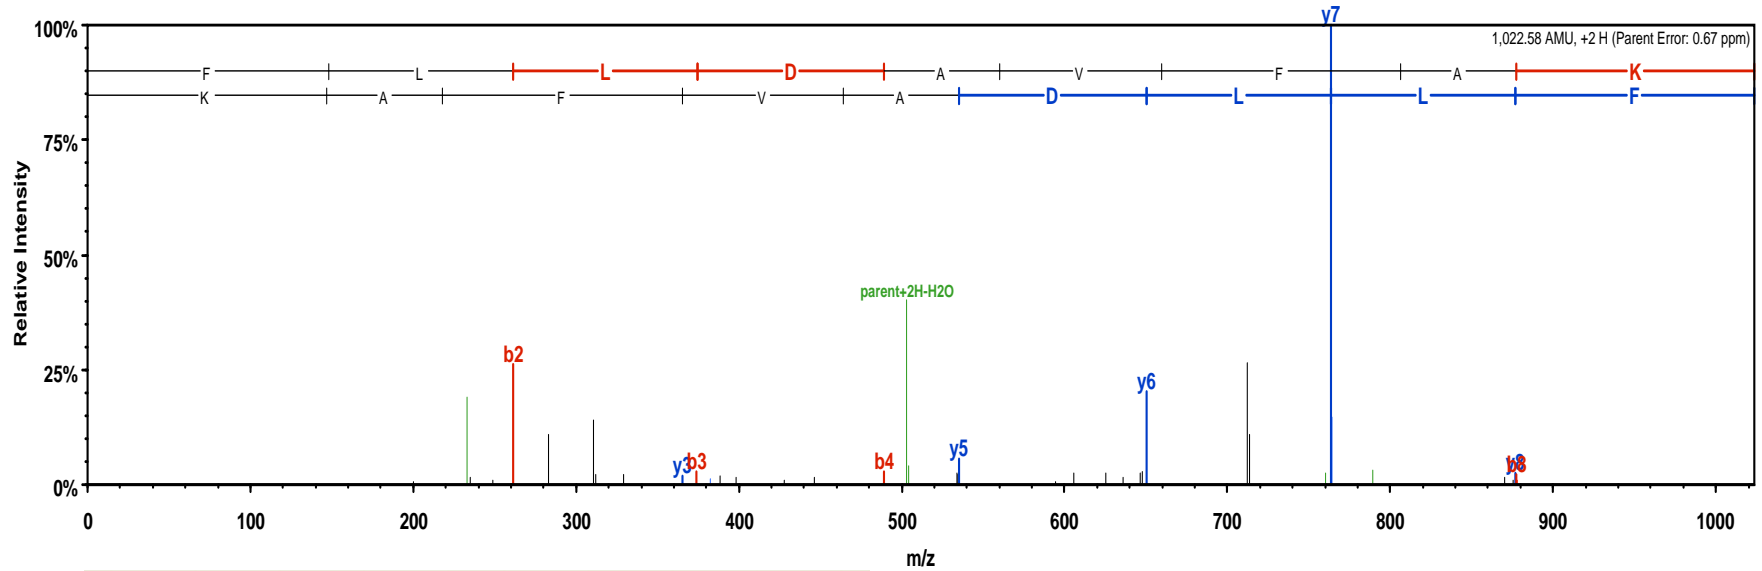

| ... | B Ions  | B+2H  | B-NH3   | B-H2O   | AA | Y Ions  | Y+2H  | Y-NH3   | Y-H2O   | ... |
|-----|---------|-------|---------|---------|----|---------|-------|---------|---------|-----|
| 1   | 148.1   |       |         |         | F  | 1,023.6 | 512.3 | 1,006.6 | 1,005.6 | 9   |
| 2   | 261.2   |       |         |         | L  | 876.5   | 438.8 | 859.5   | 858.5   | 8   |
| 3   | 374.2   |       |         |         | L  | 763.4   | 382.2 | 746.4   | 745.4   | 7   |
| 4   | 489.3   |       |         | 471.3   | D  | 650.4   | 325.7 | 633.3   | 632.3   | 6   |
| 5   | 560.3   |       |         | 542.3   | A  | 535.3   |       | 518.3   |         | 5   |
| 6   | 659.4   | 330.2 |         | 641.4   | V  | 464.3   |       | 447.3   |         | 4   |
| 7   | 806.4   | 403.7 |         | 788.4   | F  | 365.2   |       | 348.2   |         | 3   |
| 8   | 877.5   | 439.2 |         | 859.5   | A  | 218.1   |       | 201.1   |         | 2   |
| 9   | 1,023.6 | 512.3 | 1,006.6 | 1,005.6 | K  | 147.1   |       | 130.1   |         | 1   |

# Nuclear proteome

| Protein No. | Leading protein name  | Sequence | Mascot Score | Variable Modifications   | SILAC State | Charge | m/z       |
|-------------|-----------------------|----------|--------------|--------------------------|-------------|--------|-----------|
| N-125       | sp Q9UQN3 CHM2B_HUMAN | QLELEIKK | 29.07        | Gln->pyro-Glu (N-term Q) | Light       | 2      | 492.29223 |

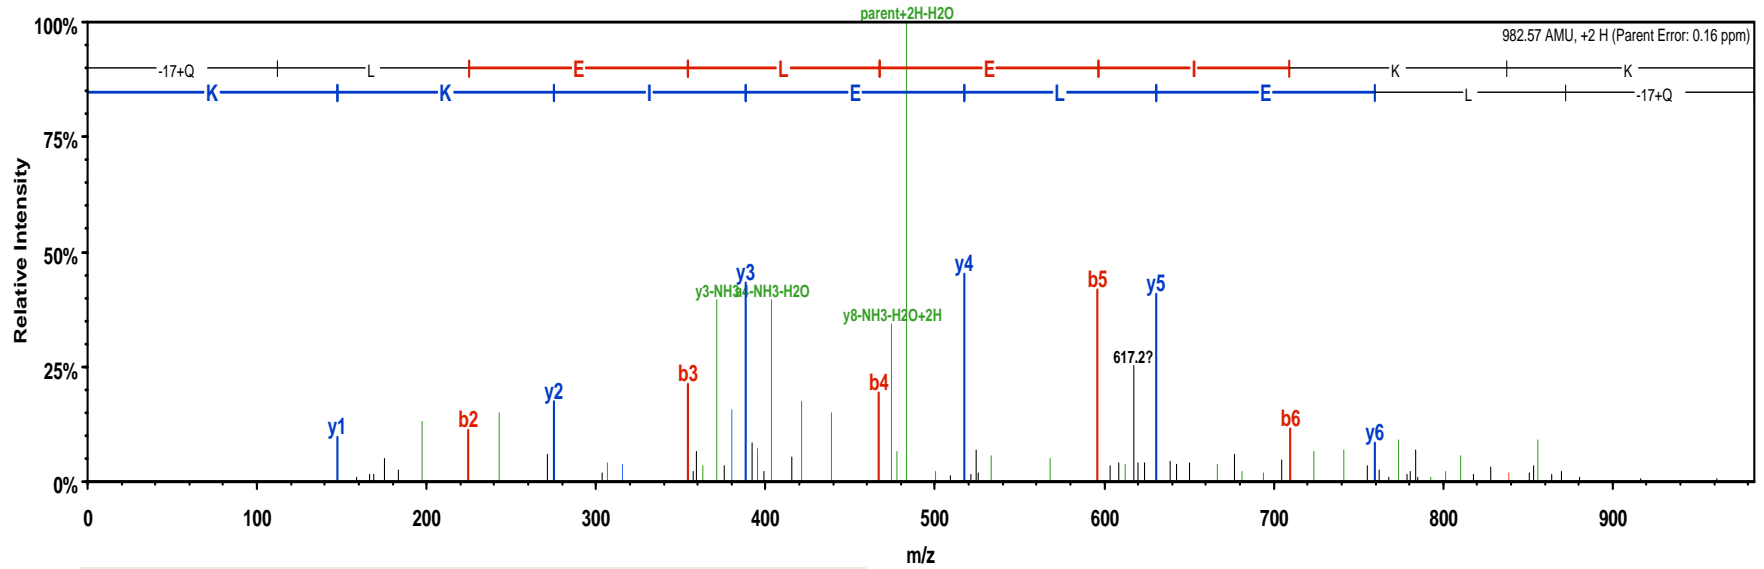

| ... | B Ions | B+2H  | B-NH3 | B-H2O | AA   | Y Ions | Y+2H  | Y-NH3 | Y-H2O | ... |
|-----|--------|-------|-------|-------|------|--------|-------|-------|-------|-----|
| 1   | 112.0  |       | 95.0  |       | Q-17 | 983.6  | 492.3 | 966.6 | 965.6 | 8   |
| 2   | 225.1  |       | 208.1 |       | L    | 872.5  | 436.8 | 855.5 | 854.5 | 7   |
| 3   | 354.2  |       | 337.1 | 336.2 | E    | 759.5  | 380.2 | 742.4 | 741.5 | 6   |
| 4   | 467.3  |       | 450.2 | 449.2 | L    | 630.4  | 315.7 | 613.4 | 612.4 | 5   |
| 5   | 596.3  |       | 579.3 | 578.3 | E    | 517.3  | 259.2 | 500.3 | 499.3 | 4   |
| 6   | 709.4  | 355.2 | 692.4 | 691.4 | I    | 388.3  | 194.6 | 371.3 |       | 3   |
| 7   | 837.5  | 419.2 | 820.4 | 819.5 | K    | 275.2  | 138.1 | 258.2 |       | 2   |
| 8   | 983.6  | 492.3 | 966.6 | 965.6 | K    | 147.1  |       | 130.1 |       | 1   |

# Nuclear proteome

| Protein No. | Leading protein name | Sequence  | Mascot Score | Variable Modifications | SILAC State | Charge | m/z       |
|-------------|----------------------|-----------|--------------|------------------------|-------------|--------|-----------|
| N-126       | splQ9Y2Z9 COQ6_HUMAN | ILLLEAGPK | 28.19        | Unmodified             | Light       | 2      | 477.30514 |

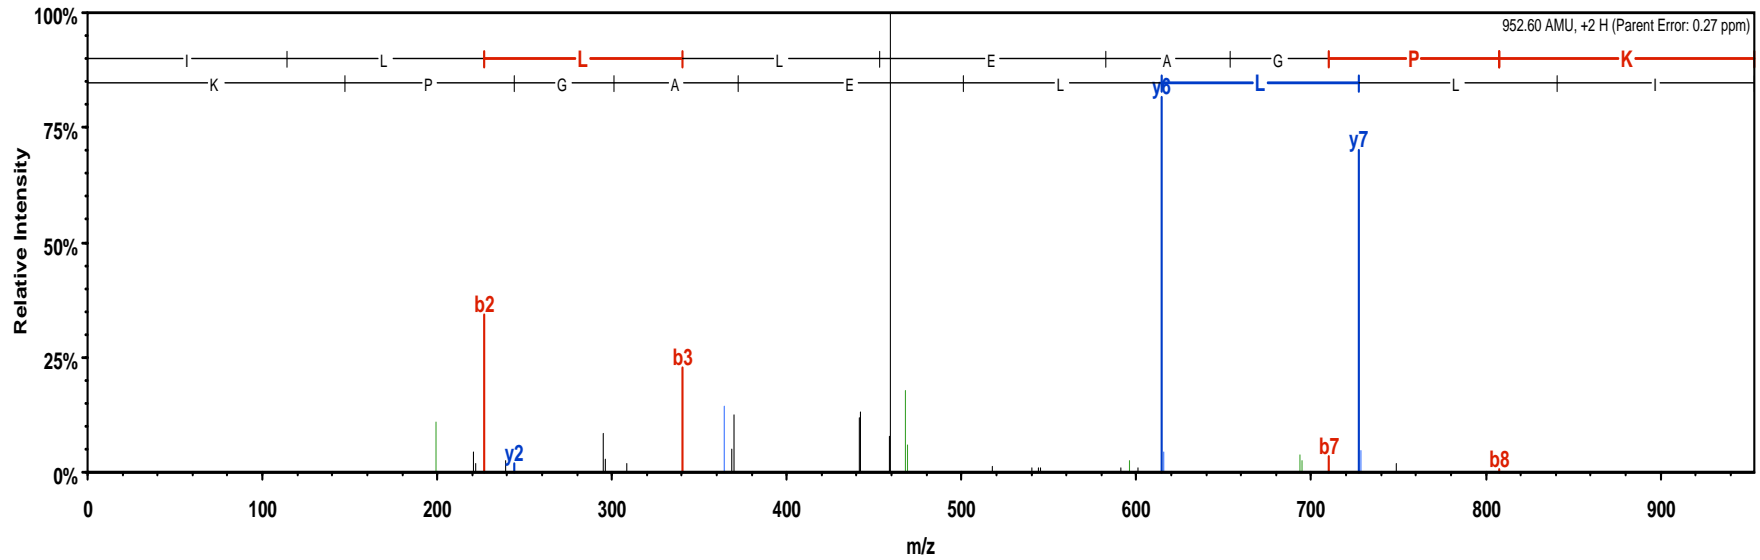

| ... | B Ions | B+2H  | B-NH3 | B-H2O | AA | Y Ions | Y+2H  | Y-NH3 | Y-H2O | ... |
|-----|--------|-------|-------|-------|----|--------|-------|-------|-------|-----|
| 1   | 114.1  |       |       |       | I  | 953.6  | 477.3 | 936.6 | 935.6 | 9   |
| 2   | 227.2  |       |       |       | L  | 840.5  | 420.8 | 823.5 | 822.5 | 8   |
| 3   | 340.3  |       |       |       | L  | 727.4  | 364.2 | 710.4 | 709.4 | 7   |
| 4   | 453.3  |       |       |       | L  | 614.4  | 307.7 | 597.3 | 596.3 | 6   |
| 5   | 582.4  |       |       | 564.4 | E  | 501.3  |       | 484.2 | 483.3 | 5   |
| 6   | 653.4  | 327.2 |       | 635.4 | A  | 372.2  |       | 355.2 |       | 4   |
| 7   | 710.4  | 355.7 |       | 692.4 | G  | 301.2  |       | 284.2 |       | 3   |
| 8   | 807.5  | 404.3 |       | 789.5 | P  | 244.2  |       | 227.1 |       | 2   |
| 9   | 953.6  | 477.3 | 936.6 | 935.6 | K  | 147.1  |       | 130.1 |       | 1   |

# Nuclear proteome

| Protein No. | Leading protein name  | Sequence   | Mascot Score | Variable Modifications | SILAC State | Charge | m/z       |
|-------------|-----------------------|------------|--------------|------------------------|-------------|--------|-----------|
| N-127       | sp Q15573 TAF1A_HUMAN | IPGVWDPFVK | 26.92        | Unmodified             | Light       | 2      | 579.32132 |

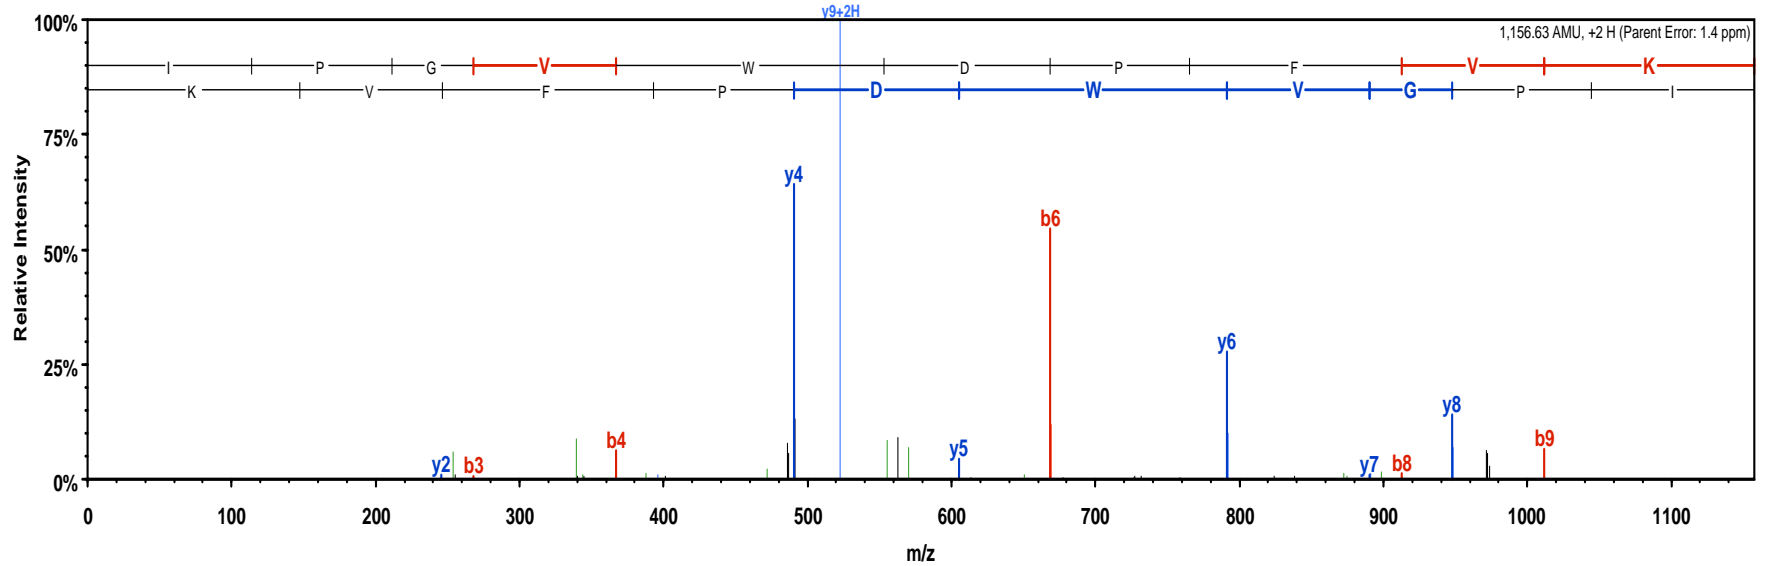

| ... | B Ions  | B+2H  | B-NH3   | B-H2O   | AA | Y Ions  | Y+2H  | Y-NH3   | Y-H2O   | ... |
|-----|---------|-------|---------|---------|----|---------|-------|---------|---------|-----|
| 1   | 114.1   |       |         |         | I  | 1,157.6 | 579.3 | 1,140.6 | 1,139.6 | 10  |
| 2   | 211.1   |       |         |         | P  | 1,044.6 | 522.8 | 1,027.5 | 1,026.5 | 9   |
| 3   | 268.2   |       |         |         | G  | 947.5   | 474.3 | 930.5   | 929.5   | 8   |
| 4   | 367.2   |       |         |         | V  | 890.5   | 445.7 | 873.5   | 872.5   | 7   |
| 5   | 553.3   |       |         |         | W  | 791.4   | 396.2 | 774.4   | 773.4   | 6   |
| 6   | 668.3   | 334.7 |         | 650.3   | D  | 605.3   |       | 588.3   | 587.3   | 5   |
| 7   | 765.4   | 383.2 |         | 747.4   | P  | 490.3   |       | 473.3   |         | 4   |
| 8   | 912.5   | 456.7 |         | 894.5   | F  | 393.2   |       | 376.2   |         | 3   |
| 9   | 1,011.5 | 506.3 |         | 993.5   | V  | 246.2   |       | 229.2   |         | 2   |
| 10  | 1,157.6 | 579.3 | 1,140.6 | 1,139.6 | K  | 147.1   |       | 130.1   |         | 1   |



# Nuclear proteome

| Protein No. | Leading protein name | Sequence           | Mascot Score | Variable Modifications | SILAC State | Charge | m/z       |
|-------------|----------------------|--------------------|--------------|------------------------|-------------|--------|-----------|
| N-128       | sp P04439 A03_HUMAN  | QDAYDGGKDYIALNEDLR | 26.56        | Unmodified             | Light       | 3      | 666.98496 |

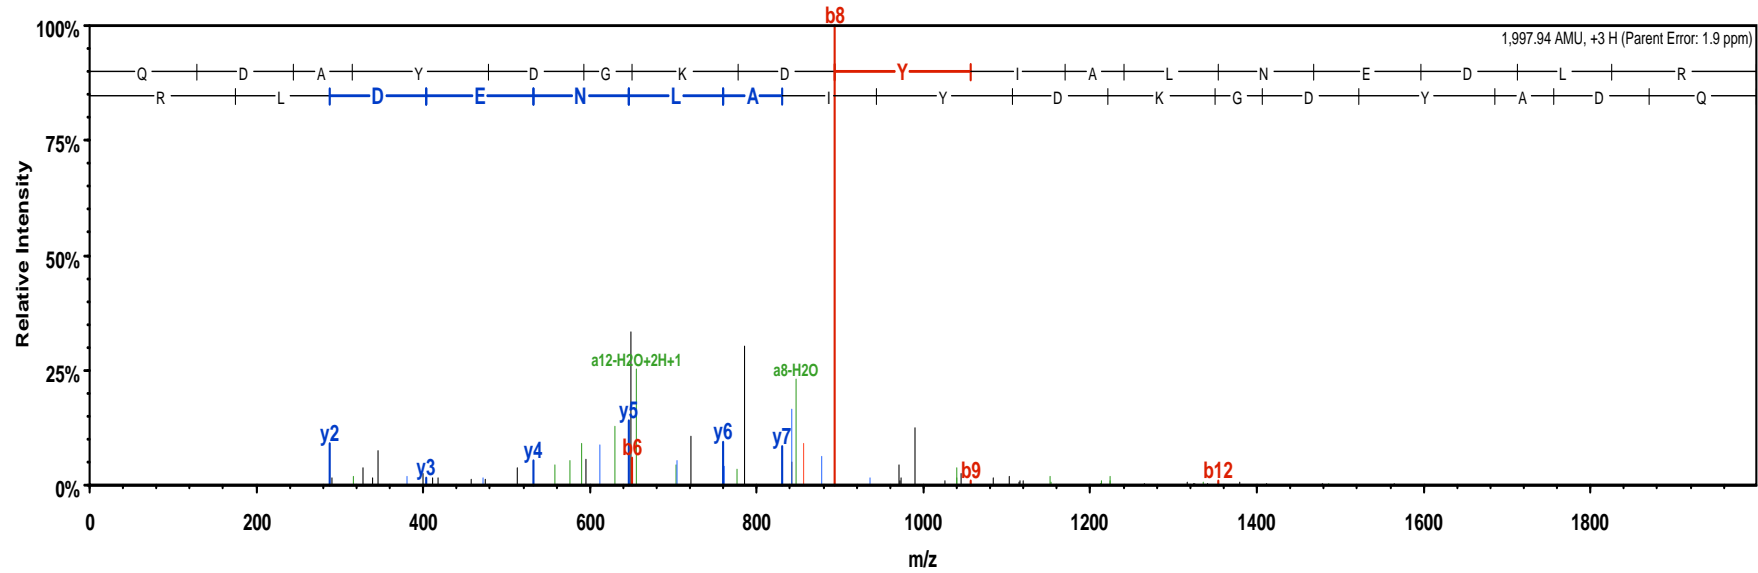

| ... | B Ions  | B+2H    | B-NH3   | B-H2O   | AA | Y Ions  | Y+2H    | Y-NH3   | Y-H2O   | ... |
|-----|---------|---------|---------|---------|----|---------|---------|---------|---------|-----|
| 1   | 129.1   |         | 112.0   |         | Q  | 1,998.9 | 1,000.0 | 1,981.9 | 1,980.9 | 17  |
| 2   | 244.1   |         | 227.1   | 226.1   | D  | 1,870.9 | 935.9   | 1,853.9 | 1,852.9 | 16  |
| 3   | 315.1   |         | 298.1   | 297.1   | A  | 1,755.9 | 878.4   | 1,738.8 | 1,737.8 | 15  |
| 4   | 478.2   |         | 461.2   | 460.2   | Y  | 1,684.8 | 842.9   | 1,667.8 | 1,666.8 | 14  |
| 5   | 593.2   |         | 576.2   | 575.2   | D  | 1,521.8 | 761.4   | 1,504.7 | 1,503.7 | 13  |
| 6   | 650.2   | 325.6   | 633.2   | 632.2   | G  | 1,406.7 | 703.9   | 1,389.7 | 1,388.7 | 12  |
| 7   | 778.3   | 389.7   | 761.3   | 760.3   | K  | 1,349.7 | 675.4   | 1,332.7 | 1,331.7 | 11  |
| 8   | 893.4   | 447.2   | 876.3   | 875.4   | D  | 1,221.6 | 611.3   | 1,204.6 | 1,203.6 | 10  |
| 9   | 1,056.4 | 528.7   | 1,039.4 | 1,038.4 | Y  | 1,106.6 | 553.8   | 1,089.6 | 1,088.6 | 9   |
| 10  | 1,169.5 | 585.3   | 1,152.5 | 1,151.5 | I  | 943.5   | 472.3   | 926.5   | 925.5   | 8   |
| 11  | 1,240.5 | 620.8   | 1,223.5 | 1,222.5 | A  | 830.4   | 415.7   | 813.4   | 812.4   | 7   |
| 12  | 1,353.6 | 677.3   | 1,336.6 | 1,335.6 | L  | 759.4   | 380.2   | 742.4   | 741.4   | 6   |
| 13  | 1,467.7 | 734.3   | 1,450.6 | 1,449.7 | N  | 646.3   |         | 629.3   | 628.3   | 5   |
| 14  | 1,596.7 | 798.9   | 1,579.7 | 1,578.8 | E  | 532.3   |         | 515.2   | 514.3   | 4   |
| 15  | 1,711.7 | 856.4   | 1,694.7 | 1,693.7 | D  | 403.2   |         | 386.2   | 385.2   | 3   |
| 16  | 1,824.8 | 912.9   | 1,807.8 | 1,806.8 | L  | 288.2   |         | 271.2   |         | 2   |
| 17  | 1,998.9 | 1,000.0 | 1,981.9 | 1,980.9 | R  | 175.1   |         | 158.1   |         | 1   |

# Nuclear proteome

| Protein No. | Leading protein name   | Sequence       | Mascot Score | Variable Modifications   | SILAC State | Charge | m/z       |
|-------------|------------------------|----------------|--------------|--------------------------|-------------|--------|-----------|
| N-129       | sp P20339 IRAB5A_HUMAN | QASPNIVIALSGNK | 26.43        | Gln->pyro-Glu (N-term Q) | Light       | 2      | 697.88554 |

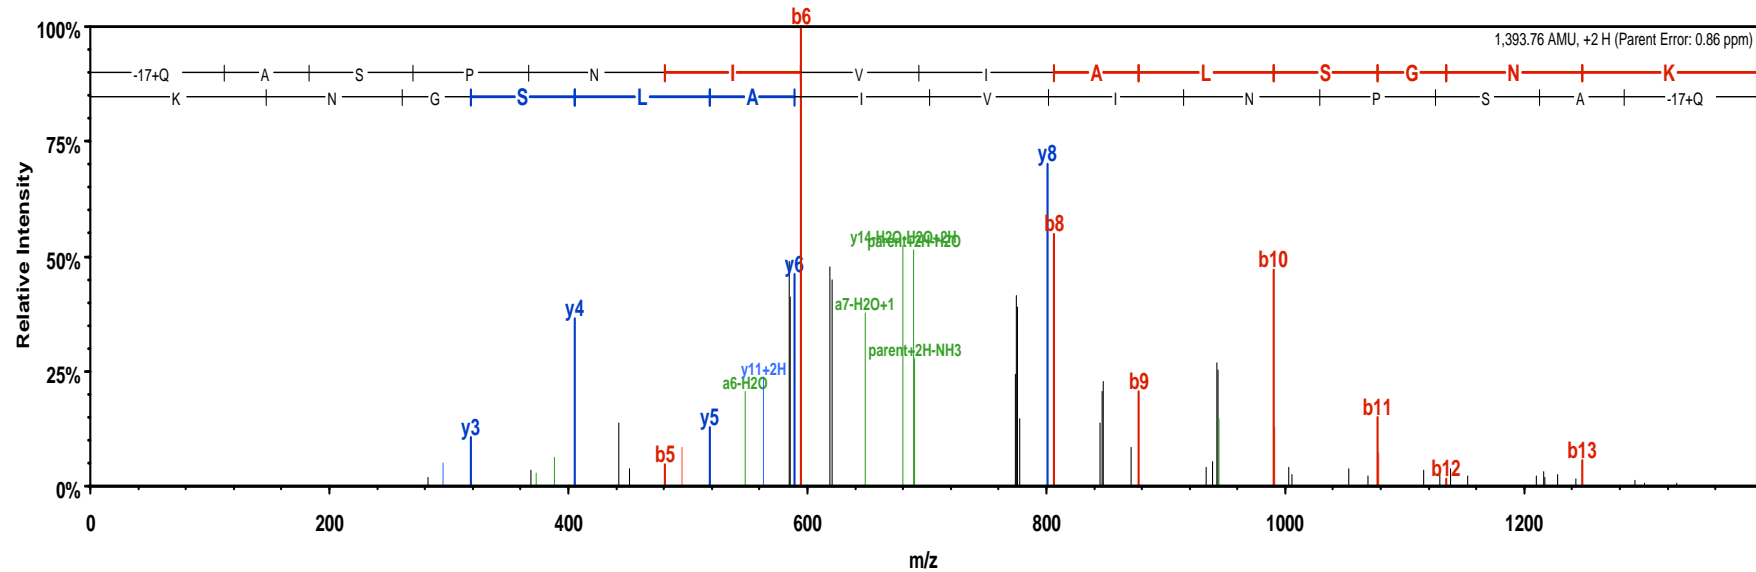

| ... | B Ions  | B+2H  | B-NH3   | B-H2O   | AA   | Y Ions  | Y+2H  | Y-NH3   | Y-H2O   | ... |
|-----|---------|-------|---------|---------|------|---------|-------|---------|---------|-----|
| 1   | 112.0   |       | 95.0    |         | Q-17 | 1,394.8 | 697.9 | 1,377.7 | 1,376.8 | 14  |
| 2   | 183.1   |       | 166.0   |         | A    | 1,283.7 | 642.4 | 1,266.7 | 1,265.7 | 13  |
| 3   | 270.1   |       | 253.1   | 252.1   | S    | 1,212.7 | 606.9 | 1,195.7 | 1,194.7 | 12  |
| 4   | 367.2   |       | 350.1   | 349.2   | P    | 1,125.7 | 563.3 | 1,108.6 | 1,107.7 | 11  |
| 5   | 481.2   |       | 464.2   | 463.2   | N    | 1,028.6 | 514.8 | 1,011.6 | 1,010.6 | 10  |
| 6   | 594.3   | 297.6 | 577.3   | 576.3   | I    | 914.6   | 457.8 | 897.5   | 896.6   | 9   |
| 7   | 693.4   | 347.2 | 676.3   | 675.3   | V    | 801.5   | 401.2 | 784.5   | 783.5   | 8   |
| 8   | 806.4   | 403.7 | 789.4   | 788.4   | I    | 702.4   | 351.7 | 685.4   | 684.4   | 7   |
| 9   | 877.5   | 439.2 | 860.5   | 859.5   | A    | 589.3   | 295.2 | 572.3   | 571.3   | 6   |
| 10  | 990.6   | 495.8 | 973.5   | 972.6   | L    | 518.3   |       | 501.3   | 500.3   | 5   |
| 11  | 1,077.6 | 539.3 | 1,060.6 | 1,059.6 | S    | 405.2   |       | 388.2   | 387.2   | 4   |
| 12  | 1,134.6 | 567.8 | 1,117.6 | 1,116.6 | G    | 318.2   |       | 301.2   |         | 3   |
| 13  | 1,248.7 | 624.8 | 1,231.6 | 1,230.6 | N    | 261.2   |       | 244.1   |         | 2   |
| 14  | 1,394.8 | 697.9 | 1,377.7 | 1,376.8 | K    | 147.1   |       | 130.1   |         | 1   |

# Nuclear proteome

| Protein No. | Leading protein name  | Sequence      | Mascot Score | Variable Modifications | SILAC State | Charge | m/z       |
|-------------|-----------------------|---------------|--------------|------------------------|-------------|--------|-----------|
| N-130       | sp P09669 COX6C_HUMAN | NYDVMKDFEEMRK | 26.36        | Unmodified             | Light       | 3      | 568.92885 |

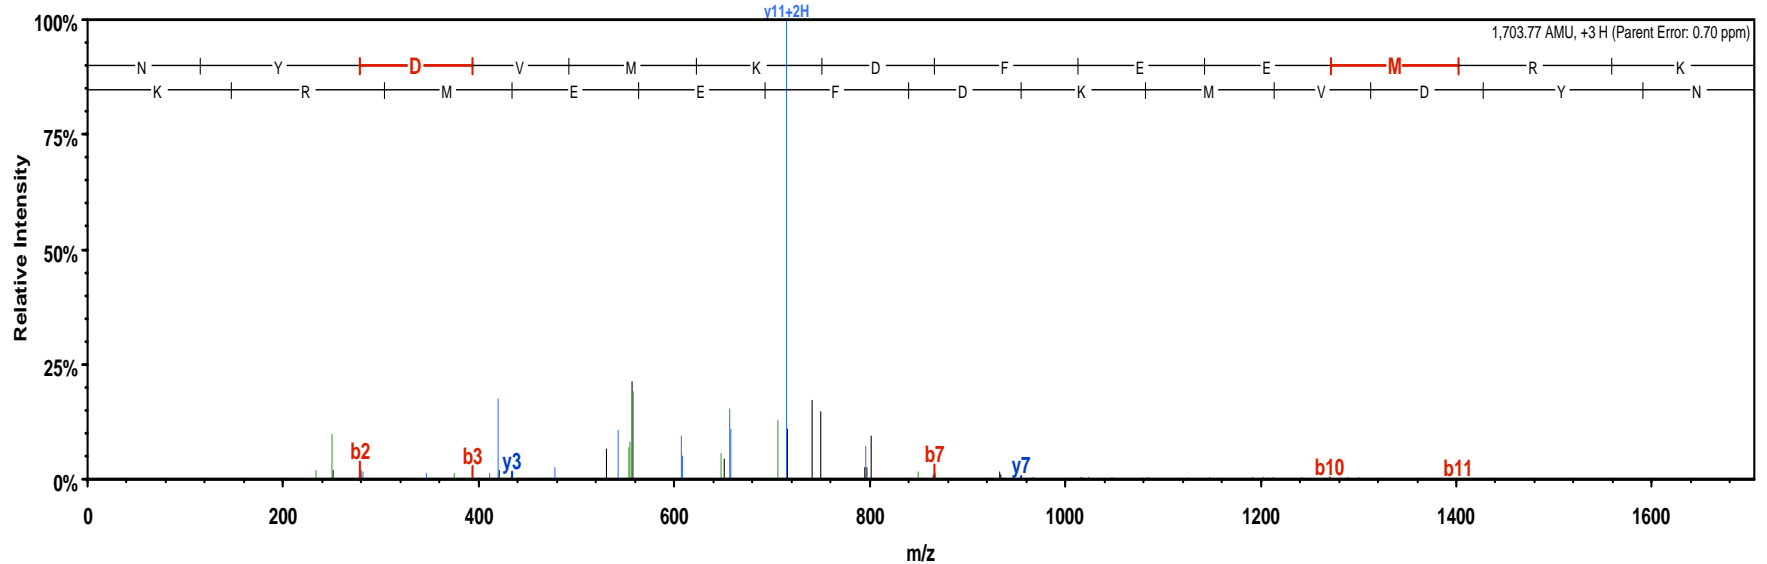

| ... | B Ions  | B+2H  | B-NH3   | B-H2O   | AA | Y Ions  | Y+2H  | Y-NH3   | Y-H2O   | ... |
|-----|---------|-------|---------|---------|----|---------|-------|---------|---------|-----|
| 1   | 115.1   |       | 98.0    |         | N  | 1,704.8 | 852.9 | 1,687.7 | 1,686.8 | 13  |
| 2   | 278.1   |       | 261.1   |         | Y  | 1,590.7 | 795.9 | 1,573.7 | 1,572.7 | 12  |
| 3   | 393.1   |       | 376.1   | 375.1   | D  | 1,427.7 | 714.3 | 1,410.6 | 1,409.7 | 11  |
| 4   | 492.2   |       | 475.2   | 474.2   | Y  | 1,312.6 | 656.8 | 1,295.6 | 1,294.6 | 10  |
| 5   | 623.2   |       | 606.2   | 605.2   | M  | 1,213.6 | 607.3 | 1,196.5 | 1,195.6 | 9   |
| 6   | 751.3   | 376.2 | 734.3   | 733.3   | K  | 1,082.5 | 541.8 | 1,065.5 | 1,064.5 | 8   |
| 7   | 866.4   | 433.7 | 849.3   | 848.4   | D  | 954.4   | 477.7 | 937.4   | 936.4   | 7   |
| 8   | 1,013.4 | 507.2 | 996.4   | 995.4   | F  | 839.4   | 420.2 | 822.4   | 821.4   | 6   |
| 9   | 1,142.5 | 571.7 | 1,125.5 | 1,124.5 | E  | 692.3   | 346.7 | 675.3   | 674.3   | 5   |
| 10  | 1,271.5 | 636.3 | 1,254.5 | 1,253.5 | E  | 563.3   | 282.2 | 546.3   | 545.3   | 4   |
| 11  | 1,402.6 | 701.8 | 1,385.5 | 1,384.6 | M  | 434.3   | 217.6 | 417.2   |         | 3   |
| 12  | 1,558.7 | 779.8 | 1,541.6 | 1,540.7 | R  | 303.2   | 152.1 | 286.2   |         | 2   |
| 13  | 1,704.8 | 852.9 | 1,687.7 | 1,686.8 | K  | 147.1   |       | 130.1   |         | 1   |

# Nuclear proteome

| Protein No. | Leading protein name  | Sequence       | Mascot Score | Variable Modifications  | SILAC State | Charge | m/z       |
|-------------|-----------------------|----------------|--------------|-------------------------|-------------|--------|-----------|
| N-131       | sp Q8WWH5 TRUB1_HUMAN | AASEAAVVSSPSLK | 25.04        | Acetyl (Protein N-term) | Heavy       | 2      | 679.86173 |

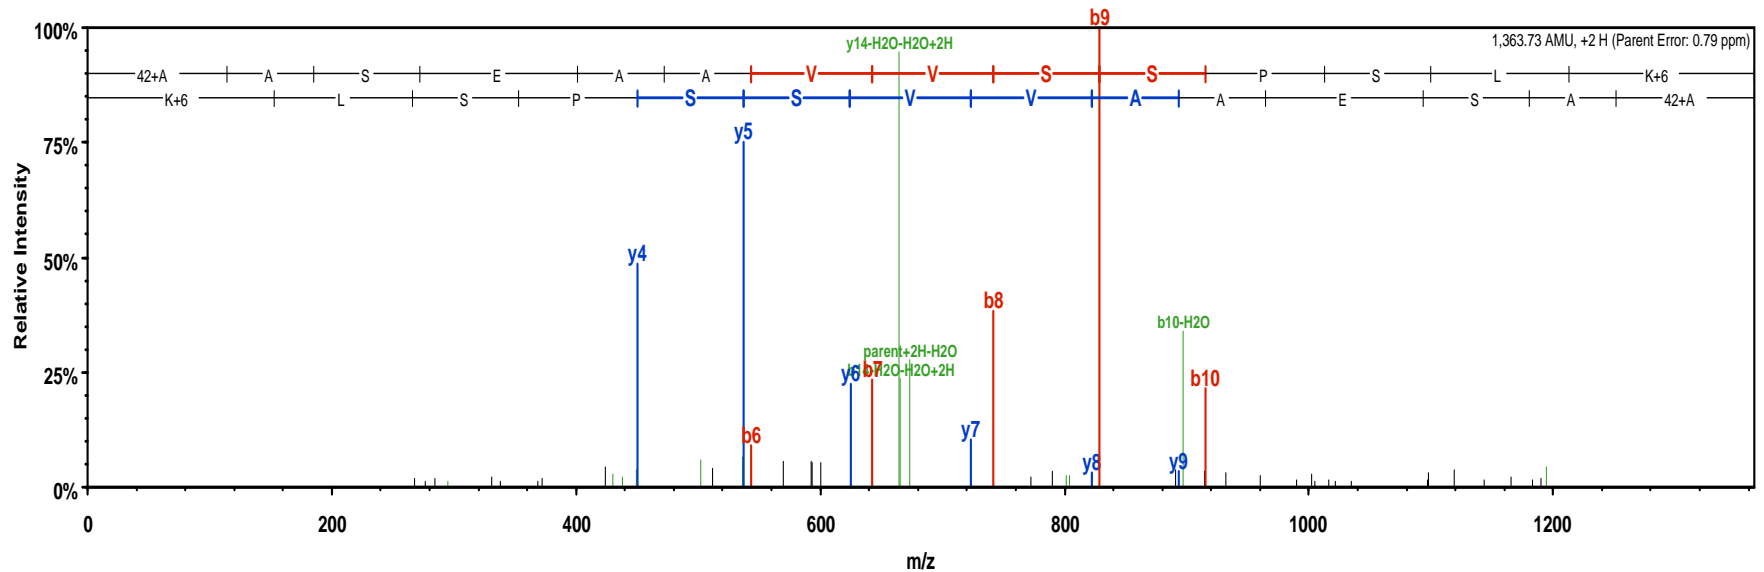

| ... | B Ions  | B+2H  | B-NH3   | B-H2O   | AA   | Y Ions  | Y+2H  | Y-NH3   | Y-H2O   | ... |
|-----|---------|-------|---------|---------|------|---------|-------|---------|---------|-----|
| 1   | 114.1   |       |         |         | A+42 | 1,364.7 | 682.9 | 1,347.7 | 1,346.7 | 14  |
| 2   | 185.1   |       |         |         | A    | 1,251.7 | 626.3 | 1,234.7 | 1,233.7 | 13  |
| 3   | 272.1   |       |         | 254.1   | S    | 1,180.7 | 590.8 | 1,163.6 | 1,162.6 | 12  |
| 4   | 401.2   |       |         | 383.2   | E    | 1,093.6 | 547.3 | 1,076.6 | 1,075.6 | 11  |
| 5   | 472.2   |       |         | 454.2   | A    | 964.6   | 482.8 | 947.6   | 946.6   | 10  |
| 6   | 543.2   | 272.1 |         | 525.2   | A    | 893.5   | 447.3 | 876.5   | 875.5   | 9   |
| 7   | 642.3   | 321.7 |         | 624.3   | V    | 822.5   | 411.8 | 805.5   | 804.5   | 8   |
| 8   | 741.4   | 371.2 |         | 723.4   | V    | 723.4   | 362.2 | 706.4   | 705.4   | 7   |
| 9   | 828.4   | 414.7 |         | 810.4   | S    | 624.4   | 312.7 | 607.3   | 606.4   | 6   |
| 10  | 915.4   | 458.2 |         | 897.4   | S    | 537.3   |       | 520.3   | 519.3   | 5   |
| 11  | 1,012.5 | 506.8 |         | 994.5   | P    | 450.3   |       | 433.3   | 432.3   | 4   |
| 12  | 1,099.5 | 550.3 |         | 1,081.5 | S    | 353.2   |       | 336.2   | 335.2   | 3   |
| 13  | 1,212.6 | 606.8 |         | 1,194.6 | L    | 266.2   |       | 249.2   |         | 2   |
| 14  | 1,364.7 | 682.9 | 1,347.7 | 1,346.7 | K+6  | 153.1   |       | 136.1   |         | 1   |

# Nuclear proteome

| Protein No. | Leading protein name  | Sequence          | Mascot Score | Variable Modifications | SILAC State | Charge | m/z       |
|-------------|-----------------------|-------------------|--------------|------------------------|-------------|--------|-----------|
| N-132       | sp Q4J6C6 PPCEL_HUMAN | LPPWACGFIMDTNSDPK | 22.54        | Unmodified             | Light       | 2      | 974.95023 |

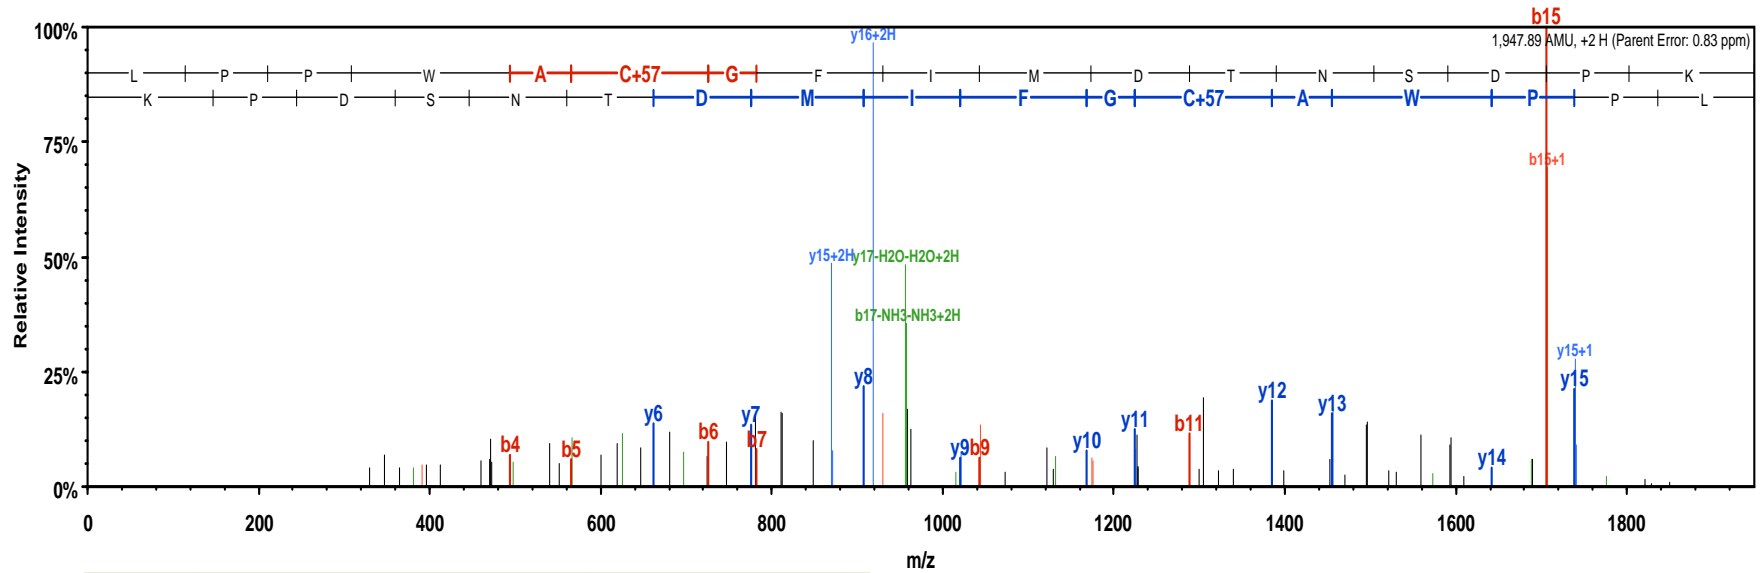

| ... | B Ions  | B+2H  | B-NH3   | B-H2O   | AA   | Y Ions  | Y+2H  | Y-NH3   | Y-H2O   | ... |
|-----|---------|-------|---------|---------|------|---------|-------|---------|---------|-----|
| 1   | 114.1   |       |         |         | L    | 1,948.9 | 975.0 | 1,931.9 | 1,930.9 | 17  |
| 2   | 211.1   |       |         |         | P    | 1,835.8 | 918.4 | 1,818.8 | 1,817.8 | 16  |
| 3   | 308.2   |       |         |         | P    | 1,738.8 | 869.9 | 1,721.7 | 1,720.7 | 15  |
| 4   | 494.3   |       |         |         | W    | 1,641.7 | 821.4 | 1,624.7 | 1,623.7 | 14  |
| 5   | 565.3   |       |         |         | A    | 1,455.6 | 728.3 | 1,438.6 | 1,437.6 | 13  |
| 6   | 725.3   | 363.2 |         |         | C+57 | 1,384.6 | 692.8 | 1,367.6 | 1,366.6 | 12  |
| 7   | 782.4   | 391.7 |         |         | G    | 1,224.6 | 612.8 | 1,207.5 | 1,206.5 | 11  |
| 8   | 929.4   | 465.2 |         |         | F    | 1,167.5 | 584.3 | 1,150.5 | 1,149.5 | 10  |
| 9   | 1,042.5 | 521.8 |         |         | I    | 1,020.5 | 510.7 | 1,003.4 | 1,002.5 | 9   |
| 10  | 1,173.6 | 587.3 |         |         | M    | 907.4   | 454.2 | 890.4   | 889.4   | 8   |
| 11  | 1,288.6 | 644.8 |         | 1,270.6 | D    | 776.3   | 388.7 | 759.3   | 758.3   | 7   |
| 12  | 1,389.6 | 695.3 |         | 1,371.6 | T    | 661.3   | 331.2 | 644.3   | 643.3   | 6   |
| 13  | 1,503.7 | 752.3 | 1,486.6 | 1,485.7 | N    | 560.3   |       | 543.2   | 542.3   | 5   |
| 14  | 1,590.7 | 795.9 | 1,573.7 | 1,572.7 | S    | 446.2   |       | 429.2   | 428.2   | 4   |
| 15  | 1,705.7 | 853.4 | 1,688.7 | 1,687.7 | D    | 359.2   |       | 342.2   | 341.2   | 3   |
| 16  | 1,802.8 | 901.9 | 1,785.8 | 1,784.8 | P    | 244.2   |       | 227.1   |         | 2   |
| 17  | 1,948.9 | 975.0 | 1,931.9 | 1,930.9 | K    | 147.1   |       | 130.1   |         | 1   |

# Nuclear proteome

| Protein No. | Leading protein name  | Sequence   | Mascot Score | Variable Modifications | SILAC State | Charge | m/z       |
|-------------|-----------------------|------------|--------------|------------------------|-------------|--------|-----------|
| N-133       | sp Q6NUS6 TECT3_HUMAN | WPFDFDFPFK | 21.83        | Unmodified             | Light       | 2      | 615.80276 |

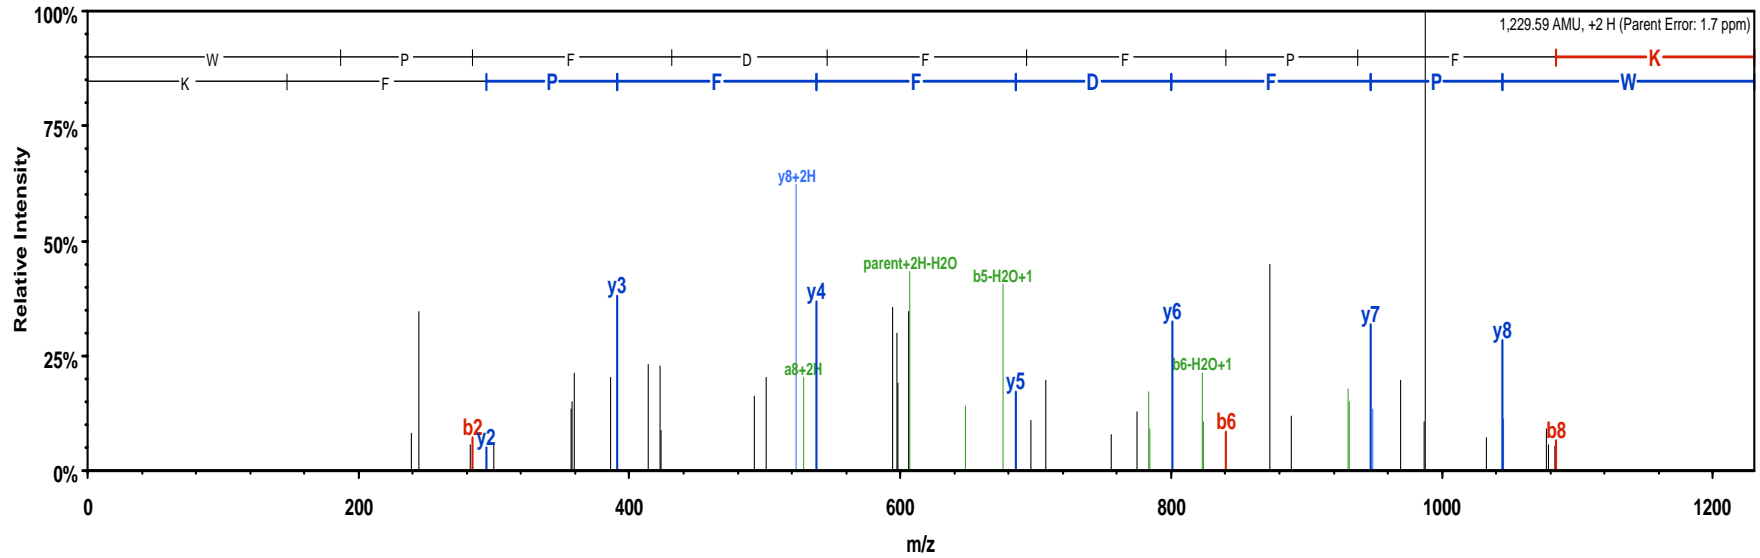

| ... | B Ions  | B+2H  | B-NH3   | B-H2O   | AA | Y Ions  | Y+2H  | Y-NH3   | Y-H2O   | ... |
|-----|---------|-------|---------|---------|----|---------|-------|---------|---------|-----|
| 1   | 187.1   |       |         |         | W  | 1,230.6 | 615.8 | 1,213.6 | 1,212.6 | 9   |
| 2   | 284.1   |       |         |         | P  | 1,044.5 | 522.8 | 1,027.5 | 1,026.5 | 8   |
| 3   | 431.2   |       |         |         | F  | 947.5   | 474.2 | 930.4   | 929.5   | 7   |
| 4   | 546.2   |       |         | 528.2   | D  | 800.4   | 400.7 | 783.4   | 782.4   | 6   |
| 5   | 693.3   |       |         | 675.3   | F  | 685.4   |       | 668.3   |         | 5   |
| 6   | 840.4   | 420.7 |         | 822.4   | F  | 538.3   |       | 521.3   |         | 4   |
| 7   | 937.4   | 469.2 |         | 919.4   | P  | 391.2   |       | 374.2   |         | 3   |
| 8   | 1,084.5 | 542.8 |         | 1,066.5 | F  | 294.2   |       | 277.2   |         | 2   |
| 9   | 1,230.6 | 615.8 | 1,213.6 | 1,212.6 | K  | 147.1   |       | 130.1   |         | 1   |

# Nuclear proteome

| Protein No. | Leading protein name | Sequence      | Mascot Score | Variable Modifications | SILAC State | Charge | m/z      |
|-------------|----------------------|---------------|--------------|------------------------|-------------|--------|----------|
| N-134       | sp O14607 UTY_HUMAN  | PSKNRSLVPETSR | 18.64        | Unmodified             | Light       | 2      | 735.9048 |

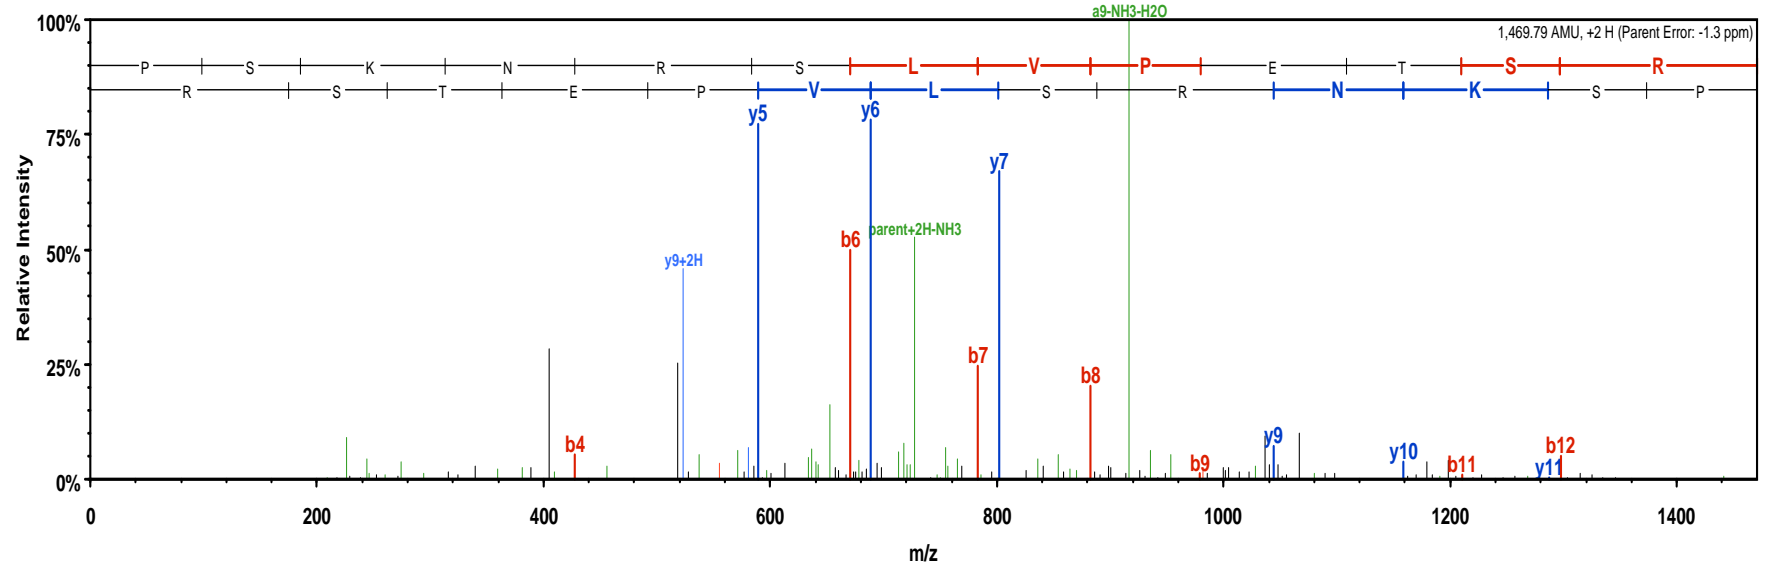

|    |         |       |         |   |         |       |         |         |    |
|----|---------|-------|---------|---|---------|-------|---------|---------|----|
| 1  | 98.1    |       |         | P | 1,470.8 | 735.9 | 1,453.8 | 1,452.8 | 13 |
| 2  | 185.1   |       | 167.1   | S | 1,373.7 | 687.4 | 1,356.7 | 1,355.7 | 12 |
| 3  | 313.2   | 157.1 | 296.2   | K | 1,286.7 | 643.9 | 1,269.7 | 1,268.7 | 11 |
| 4  | 427.2   | 214.1 | 410.2   | N | 1,158.6 | 579.8 | 1,141.6 | 1,140.6 | 10 |
| 5  | 583.3   | 292.2 | 566.3   | R | 1,044.6 | 522.8 | 1,027.6 | 1,026.6 | 9  |
| 6  | 670.4   | 335.7 | 653.3   | S | 888.5   | 444.7 | 871.5   | 870.5   | 8  |
| 7  | 783.4   | 392.2 | 766.4   | L | 801.4   | 401.2 | 784.4   | 783.4   | 7  |
| 8  | 882.5   | 441.8 | 865.5   | V | 688.4   | 344.7 | 671.3   | 670.4   | 6  |
| 9  | 979.6   | 490.3 | 962.5   | P | 589.3   |       | 572.3   | 571.3   | 5  |
| 10 | 1,108.6 | 554.8 | 1,091.6 | E | 492.2   |       | 475.2   | 474.2   | 4  |
| 11 | 1,209.7 | 605.3 | 1,192.6 | T | 363.2   |       | 346.2   | 345.2   | 3  |
| 12 | 1,296.7 | 648.8 | 1,279.7 | S | 262.2   |       | 245.1   | 244.1   | 2  |
| 13 | 1,470.8 | 735.9 | 1,453.8 | R | 175.1   |       | 158.1   |         | 1  |

# Nuclear proteome

| Protein No. | Leading protein name   | Sequence  | Mascot Score | Variable Modifications | SILAC State | Charge | m/z     |
|-------------|------------------------|-----------|--------------|------------------------|-------------|--------|---------|
| N-135       | sp Q6NUQ1 IRINT1_HUMAN | IFWQMLVEK | 15.95        | Unmodified             | Light       | 2      | 597.323 |

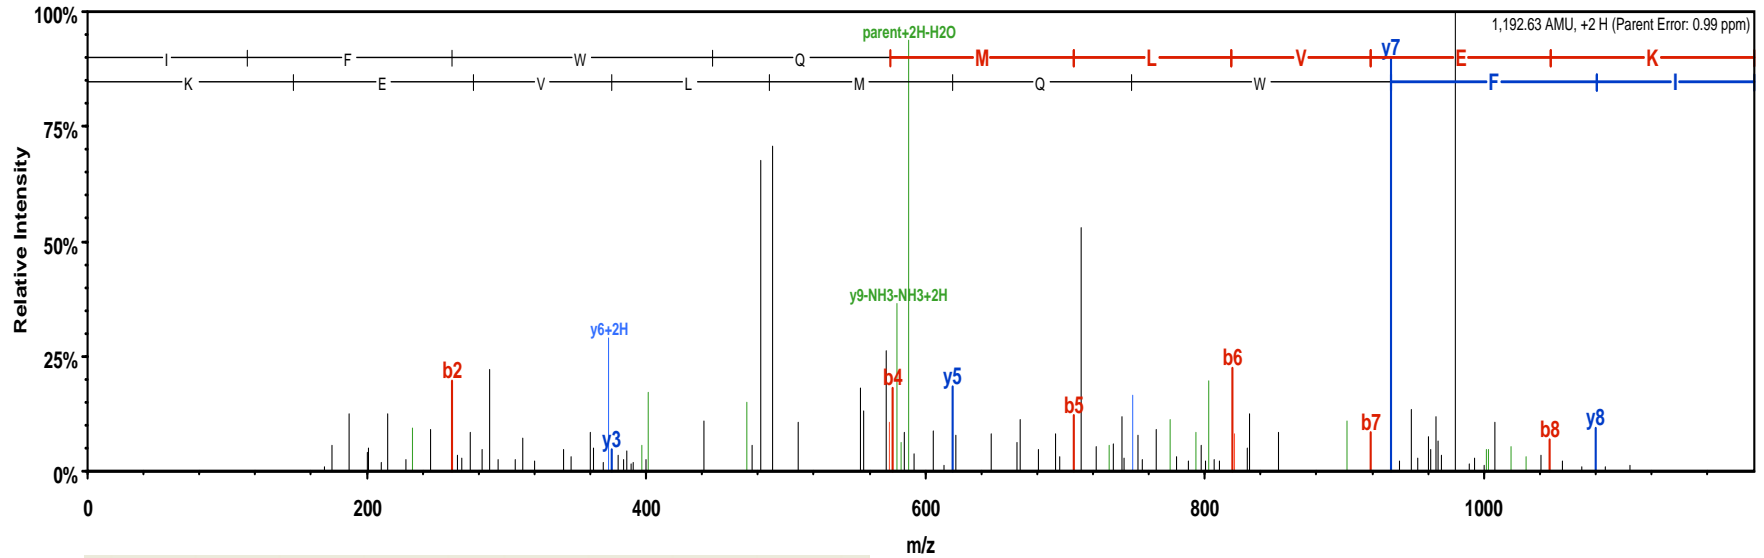

| ... | B Ions  | B+2H  | B-NH3   | B-H2O   | AA | Y Ions  | Y+2H  | Y-NH3   | Y-H2O   | ... |
|-----|---------|-------|---------|---------|----|---------|-------|---------|---------|-----|
| 1   | 114.1   |       |         |         | I  | 1,193.6 | 597.3 | 1,176.6 | 1,175.6 | 9   |
| 2   | 261.2   |       |         |         | F  | 1,080.6 | 540.8 | 1,063.5 | 1,062.5 | 8   |
| 3   | 447.2   |       |         |         | W  | 933.5   | 467.2 | 916.5   | 915.5   | 7   |
| 4   | 575.3   |       | 558.3   |         | Q  | 747.4   | 374.2 | 730.4   | 729.4   | 6   |
| 5   | 706.3   |       | 689.3   |         | M  | 619.3   |       | 602.3   | 601.3   | 5   |
| 6   | 819.4   | 410.2 | 802.4   |         | L  | 488.3   |       | 471.3   | 470.3   | 4   |
| 7   | 918.5   | 459.7 | 901.5   |         | V  | 375.2   |       | 358.2   | 357.2   | 3   |
| 8   | 1,047.5 | 524.3 | 1,030.5 | 1,029.5 | E  | 276.2   |       | 259.1   | 258.1   | 2   |
| 9   | 1,193.6 | 597.3 | 1,176.6 | 1,175.6 | K  | 147.1   |       | 130.1   |         | 1   |



# Nuclear proteome

| Protein No. | Leading protein name  | Sequence          | Mascot Score | Variable Modifications | SILAC State | Charge | m/z       |
|-------------|-----------------------|-------------------|--------------|------------------------|-------------|--------|-----------|
| N-136       | spIQ96F07ICYFP2_HUMAN | YMKSVETDSSTVEHVHR | 6.99         | Unmodified             | Heavy       | 2      | 934.44636 |

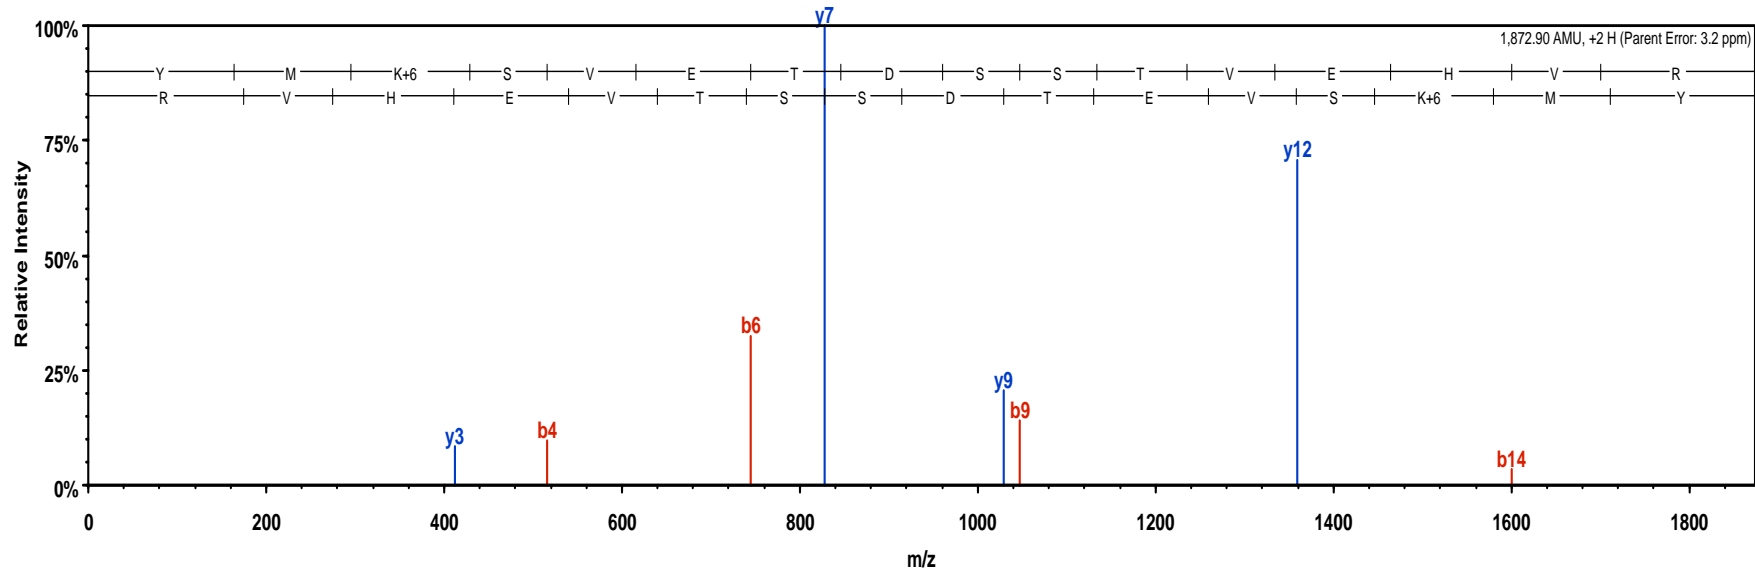

| ... | B Ions  | B+2H  | B-NH3   | B-H2O   | AA  | Y Ions  | Y+2H  | Y-NH3   | Y-H2O   | ... |
|-----|---------|-------|---------|---------|-----|---------|-------|---------|---------|-----|
| 1   | 164.1   |       |         |         | Y   | 1,873.9 | 937.5 | 1,856.9 | 1,855.9 | 16  |
| 2   | 295.1   |       |         |         | M   | 1,710.8 | 855.9 | 1,693.8 | 1,692.8 | 15  |
| 3   | 429.2   | 215.1 | 412.2   |         | K+6 | 1,579.8 | 790.4 | 1,562.8 | 1,561.8 | 14  |
| 4   | 516.3   | 258.6 | 499.2   | 498.2   | S   | 1,445.7 | 723.3 | 1,428.7 | 1,427.7 | 13  |
| 5   | 615.3   | 308.2 | 598.3   | 597.3   | V   | 1,358.7 | 679.8 | 1,341.6 | 1,340.6 | 12  |
| 6   | 744.4   | 372.7 | 727.3   | 726.4   | E   | 1,259.6 | 630.3 | 1,242.6 | 1,241.6 | 11  |
| 7   | 845.4   | 423.2 | 828.4   | 827.4   | T   | 1,130.5 | 565.8 | 1,113.5 | 1,112.5 | 10  |
| 8   | 960.4   | 480.7 | 943.4   | 942.4   | D   | 1,029.5 | 515.3 | 1,012.5 | 1,011.5 | 9   |
| 9   | 1,047.5 | 524.2 | 1,030.4 | 1,029.5 | S   | 914.5   | 457.7 | 897.4   | 896.5   | 8   |
| 10  | 1,134.5 | 567.8 | 1,117.5 | 1,116.5 | S   | 827.4   | 414.2 | 810.4   | 809.4   | 7   |
| 11  | 1,235.6 | 618.3 | 1,218.5 | 1,217.5 | T   | 740.4   | 370.7 | 723.4   | 722.4   | 6   |
| 12  | 1,334.6 | 667.8 | 1,317.6 | 1,316.6 | V   | 639.4   | 320.2 | 622.3   | 621.3   | 5   |
| 13  | 1,463.7 | 732.3 | 1,446.6 | 1,445.7 | E   | 540.3   | 270.6 | 523.3   | 522.3   | 4   |
| 14  | 1,600.7 | 800.9 | 1,583.7 | 1,582.7 | H   | 411.2   | 206.1 | 394.2   |         | 3   |
| 15  | 1,699.8 | 850.4 | 1,682.8 | 1,681.8 | V   | 274.2   |       | 257.2   |         | 2   |
| 16  | 1,873.9 | 937.5 | 1,856.9 | 1,855.9 | R   | 175.1   |       | 158.1   |         | 1   |

# Nuclear proteome

| Protein No. | Leading protein name  | Sequence          | Mascot Score | Variable Modifications | SILAC State | Charge | m/z       |
|-------------|-----------------------|-------------------|--------------|------------------------|-------------|--------|-----------|
| N-137       | sp Q6ZRS4 CC129_HUMAN | MAQKSQGSNDLQEGQEK | 6.16         | Oxidation (M)          | Light       | 2      | 947.43399 |

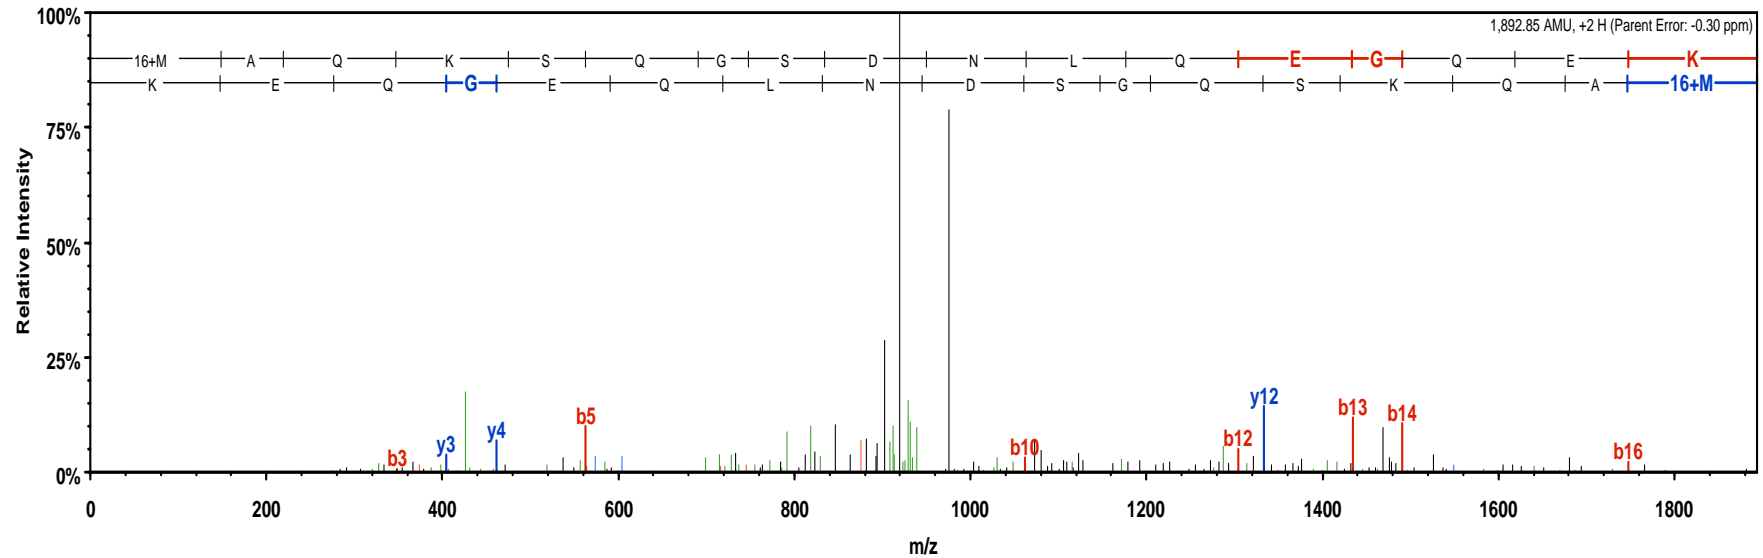

| ... | B Ions  | B+2H  | B-NH3   | B-H2O   | AA   | Y Ions  | Y+2H  | Y-NH3   | Y-H2O   | ... |
|-----|---------|-------|---------|---------|------|---------|-------|---------|---------|-----|
| 1   | 148.0   |       |         |         | M+16 | 1,893.9 | 947.4 | 1,876.8 | 1,875.9 | 17  |
| 2   | 219.1   |       |         |         | A    | 1,746.8 | 873.9 | 1,729.8 | 1,728.8 | 16  |
| 3   | 347.1   |       | 330.1   |         | Q    | 1,675.8 | 838.4 | 1,658.8 | 1,657.8 | 15  |
| 4   | 475.2   | 238.1 | 458.2   |         | K    | 1,547.7 | 774.4 | 1,530.7 | 1,529.7 | 14  |
| 5   | 562.3   | 281.6 | 545.2   | 544.3   | S    | 1,419.6 | 710.3 | 1,402.6 | 1,401.6 | 13  |
| 6   | 690.3   | 345.7 | 673.3   | 672.3   | Q    | 1,332.6 | 666.8 | 1,315.6 | 1,314.6 | 12  |
| 7   | 747.3   | 374.2 | 730.3   | 729.3   | G    | 1,204.5 | 602.8 | 1,187.5 | 1,186.5 | 11  |
| 8   | 834.4   | 417.7 | 817.4   | 816.4   | S    | 1,147.5 | 574.3 | 1,130.5 | 1,129.5 | 10  |
| 9   | 949.4   | 475.2 | 932.4   | 931.4   | D    | 1,060.5 | 530.7 | 1,043.5 | 1,042.5 | 9   |
| 10  | 1,063.4 | 532.2 | 1,046.4 | 1,045.4 | N    | 945.5   | 473.2 | 928.4   | 927.5   | 8   |
| 11  | 1,176.5 | 588.8 | 1,159.5 | 1,158.5 | L    | 831.4   | 416.2 | 814.4   | 813.4   | 7   |
| 12  | 1,304.6 | 652.8 | 1,287.6 | 1,286.6 | Q    | 718.3   | 359.7 | 701.3   | 700.3   | 6   |
| 13  | 1,433.6 | 717.3 | 1,416.6 | 1,415.6 | E    | 590.3   |       | 573.3   | 572.3   | 5   |
| 14  | 1,490.7 | 745.8 | 1,473.6 | 1,472.6 | G    | 461.2   |       | 444.2   | 443.2   | 4   |
| 15  | 1,618.7 | 809.9 | 1,601.7 | 1,600.7 | Q    | 404.2   |       | 387.2   | 386.2   | 3   |
| 16  | 1,747.8 | 874.4 | 1,730.7 | 1,729.7 | E    | 276.2   |       | 259.1   | 258.1   | 2   |
| 17  | 1,893.9 | 947.4 | 1,876.8 | 1,875.9 | K    | 147.1   |       | 130.1   |         | 1   |
